# Supplementary material for: Cell cycle arrest explains the observed bulk 3D genomic alterations in response to long-term heat shock in K562 cells
Source: HighWire-hosted journal article supplement (doi:10.1101/gr.276554.122), 2022-07-01
Supplement: Supplemental_Table_S2.xlsx [file Supplemental_Table_S2.xlsx]

## Sheet: NHS
Table S2. GO enrichment results of genes, the promoters of which lie in the anchors of LHS-specific loops in mixed cells. Results of comparison between LHS and both NHS and SHS were listed in different sheets, respectively.
ONTOLOGY	ID	Description	GeneRatio	BgRatio	pvalue	p.adjust	qvalue	geneID	Count
BP	GO:0000082	G1/S transition of mitotic cell cycle	19/451	211/10468	0.00190139	0.954419	0.954419	PLK3/ORC1/ECD/CUL5/NPAT/ATM/CCND2/PKD1/BRD7/CDT1/CRLF3/CDC6/RPTOR/ARID3A/SPDYA/ACVR1/HYAL1/PRIM2/MYC	19
BP	GO:0044843	cell cycle G1/S phase transition	19/451	224/10468	0.00372413	0.954419	0.954419	PLK3/ORC1/ECD/CUL5/NPAT/ATM/CCND2/PKD1/BRD7/CDT1/CRLF3/CDC6/RPTOR/ARID3A/SPDYA/ACVR1/HYAL1/PRIM2/MYC	19
BP	GO:0000076	DNA replication checkpoint	4/451	16/10468	0.00409278	0.954419	0.954419	CLSPN/ORC1/CDT1/CDC6	4
BP	GO:0046660	female sex differentiation	9/451	74/10468	0.00434039	0.954419	0.954419	ATM/TYRO3/CEBPB/TIPARP/VEGFA/FOXO3/IMMP2L/GNRH1/ZFPM2	9
BP	GO:0030514	negative regulation of BMP signaling pathway	5/451	26/10468	0.00450804	0.954419	0.954419	NBL1/SMURF2/DAND5/DLX1/HIPK2	5
BP	GO:0001541	ovarian follicle development	6/451	37/10468	0.0046153	0.954419	0.954419	ATM/CEBPB/VEGFA/FOXO3/IMMP2L/GNRH1	6
BP	GO:2000736	regulation of stem cell differentiation	10/451	91/10468	0.0056411	0.954419	0.954419	PWP1/SETD1A/PSMD3/ZFP36L2/PSME4/RUNX1/HES1/HSPA9/PSMB8/MYB	10
BP	GO:0008585	female gonad development	8/451	64/10468	0.00593692	0.954419	0.954419	ATM/CEBPB/TIPARP/VEGFA/FOXO3/IMMP2L/GNRH1/ZFPM2	8
BP	GO:0035459	cargo loading into vesicle	4/451	18/10468	0.00642729	0.954419	0.954419	TMED2/SEC23A/SEC13/SEC24B	4
BP	GO:0046545	development of primary female sexual characteristics	8/451	66/10468	0.00715083	0.954419	0.954419	ATM/CEBPB/TIPARP/VEGFA/FOXO3/IMMP2L/GNRH1/ZFPM2	8
BP	GO:0033314	mitotic DNA replication checkpoint	3/451	10/10468	0.00759969	0.954419	0.954419	CLSPN/ORC1/CDC6	3
BP	GO:0072170	metanephric tubule development	3/451	10/10468	0.00759969	0.954419	0.954419	ACAT1/PKD1/HES1	3
BP	GO:0072234	metanephric nephron tubule development	3/451	10/10468	0.00759969	0.954419	0.954419	ACAT1/PKD1/HES1	3
BP	GO:1900409	positive regulation of cellular response to oxidative stress	3/451	10/10468	0.00759969	0.954419	0.954419	SFPQ/MCL1/FOXO3	3
BP	GO:1902884	positive regulation of response to oxidative stress	3/451	10/10468	0.00759969	0.954419	0.954419	SFPQ/MCL1/FOXO3	3
BP	GO:1903209	positive regulation of oxidative stress-induced cell death	3/451	10/10468	0.00759969	0.954419	0.954419	SFPQ/MCL1/FOXO3	3
BP	GO:0090101	negative regulation of transmembrane receptor protein serine/threonine kinase signaling pathway	8/451	69/10468	0.00931102	0.954419	0.954419	NBL1/BAMBI/SMURF2/DAND5/LTBP1/ACVR1/DLX1/HIPK2	8
BP	GO:0009154	purine ribonucleotide catabolic process	4/451	20/10468	0.00950726	0.954419	0.954419	ACOT7/ACAT1/HDDC3/HINT1	4
BP	GO:0003151	outflow tract morphogenesis	6/451	43/10468	0.00974501	0.954419	0.954419	DHRS3/HES1/SEC24B/VEGFA/CITED2/ZFPM2	6
BP	GO:0051168	nuclear export	15/451	178/10468	0.00994795	0.954419	0.954419	SRRM1/AHCYL1/PKD1/SMG1/YWHAE/NUP85/ANKLE1/POLDIP3/SEC13/LSG1/SDAD1/HSPA9/RBM22/CCHCR1/XPO7	15
BP	GO:0050926	regulation of positive chemotaxis	3/451	11/10468	0.0101192	0.954419	0.954419	ARTN/AGER/VEGFA	3
BP	GO:0050927	positive regulation of positive chemotaxis	3/451	11/10468	0.0101192	0.954419	0.954419	ARTN/AGER/VEGFA	3
BP	GO:0072243	metanephric nephron epithelium development	3/451	11/10468	0.0101192	0.954419	0.954419	ACAT1/PKD1/HES1	3
BP	GO:1905939	regulation of gonad development	3/451	11/10468	0.0101192	0.954419	0.954419	CITED2/GNRH1/ZFPM2	3
BP	GO:0030510	regulation of BMP signaling pathway	6/451	44/10468	0.0108848	0.954419	0.954419	NBL1/SMURF2/DAND5/DLX1/HES1/HIPK2	6
BP	GO:0006611	protein export from nucleus	14/451	164/10468	0.011262	0.954419	0.954419	SRRM1/AHCYL1/PKD1/SMG1/YWHAE/NUP85/ANKLE1/POLDIP3/SEC13/SDAD1/HSPA9/RBM22/CCHCR1/XPO7	14
BP	GO:0009261	ribonucleotide catabolic process	4/451	21/10468	0.0113524	0.954419	0.954419	ACOT7/ACAT1/HDDC3/HINT1	4
BP	GO:0031058	positive regulation of histone modification	8/451	72/10468	0.0119238	0.954419	0.954419	ATM/SART3/BRD7/KAT7/C6orf89/VEGFA/MYB/PHF19	8
BP	GO:0038066	p38MAPK cascade	5/451	33/10468	0.0127109	0.954419	0.954419	ZFP36/AGER/MAPK14/VEGFA/GADD45G	5
BP	GO:0051705	multi-organism behavior	5/451	33/10468	0.0127109	0.954419	0.954419	UBE2Q1/EIF4EBP2/EN1/GAD1/PCM1	5
BP	GO:0009100	glycoprotein metabolic process	20/451	270/10468	0.0128356	0.954419	0.954419	FBXO2/FBXO44/EXT2/TMEM258/ALG9/DPAGT1/ALG10/CHSY1/ST6GALNAC1/UGGT1/HS6ST1/GALNT5/SDF2L1/TRAK1/HYAL1/PXYLP1/XXYLT1/EGFLAM/MAN1A1/RNF139	20
BP	GO:0007498	mesoderm development	8/451	73/10468	0.012904	0.954419	0.954419	EXT2/GDF11/TBX6/DAND5/ACVR1/VEGFA/CITED2/ZFPM2	8
BP	GO:0008209	androgen metabolic process	3/451	12/10468	0.0130667	0.954419	0.954419	CYP17A1/HSD17B6/TIPARP	3
BP	GO:0009954	proximal/distal pattern formation	3/451	12/10468	0.0130667	0.954419	0.954419	CHSY1/EN1/DLX1	3
BP	GO:0072207	metanephric epithelium development	3/451	12/10468	0.0130667	0.954419	0.954419	ACAT1/PKD1/HES1	3
BP	GO:0086013	membrane repolarization during cardiac muscle cell action potential	3/451	12/10468	0.0130667	0.954419	0.954419	RNF207/NOS1AP/YWHAE	3
BP	GO:2000027	regulation of animal organ morphogenesis	13/451	151/10468	0.0133902	0.954419	0.954419	RNF207/GPC6/PSMD3/SMURF2/AP2S1/PSME4/ACVR1/HES1/SEC24B/PSMB8/VEGFA/CITED2/MYC	13
BP	GO:0060674	placenta blood vessel development	4/451	22/10468	0.013413	0.954419	0.954419	TMED2/PKD1/HS6ST1/HES1	4
BP	GO:0003281	ventricular septum development	6/451	46/10468	0.0134415	0.954419	0.954419	DAND5/LTBP1/ACVR1/HES1/CITED2/ZFPM2	6
BP	GO:0035050	embryonic heart tube development	6/451	46/10468	0.0134415	0.954419	0.954419	RNF207/TMED2/TBX6/ACVR1/HES1/CITED2	6
BP	GO:0008333	endosome to lysosome transport	6/451	47/10468	0.0148654	0.954419	0.954419	SORT1/VPS18/EPG5/AP3D1/RHOB/TRAK1	6
BP	GO:1901136	carbohydrate derivative catabolic process	11/451	122/10468	0.0160393	0.954419	0.954419	ACOT7/FBXO2/FBXO44/NPL/ACAT1/UNG/GPC6/NEIL1/HDDC3/HYAL1/HINT1	11
BP	GO:0045598	regulation of fat cell differentiation	8/451	76/10468	0.0161986	0.954419	0.954419	SORT1/ZFP36/TRIB2/ZFP36L2/CEBPB/HES1/MAPK14/ZFPM2	8
BP	GO:1901532	regulation of hematopoietic progenitor cell differentiation	8/451	76/10468	0.0161986	0.954419	0.954419	SETD1A/PSMD3/PSME4/RUNX1/HES1/HSPA9/PSMB8/MYB	8
BP	GO:0051315	attachment of mitotic spindle microtubules to kinetochore	3/451	13/10468	0.0164521	0.954419	0.954419	CDT1/CENPC/BOD1	3
BP	GO:0086011	membrane repolarization during action potential	3/451	13/10468	0.0164521	0.954419	0.954419	RNF207/NOS1AP/YWHAE	3
BP	GO:0044818	mitotic G2/M transition checkpoint	4/451	24/10468	0.0182109	0.954419	0.954419	CLSPN/ORC1/ATM/CDC6	4
BP	GO:0050654	chondroitin sulfate proteoglycan metabolic process	4/451	24/10468	0.0182109	0.954419	0.954419	CHSY1/HYAL1/PXYLP1/EGFLAM	4
BP	GO:0050918	positive chemotaxis	4/451	24/10468	0.0182109	0.954419	0.954419	ARTN/ROBO3/AGER/VEGFA	4
BP	GO:0061458	reproductive system development	19/451	262/10468	0.0184356	0.954419	0.954419	UBE2Q1/ARID4B/ATM/TMED2/TYRO3/PKD1/BPTF/EPOR/HS6ST1/CEBPB/TIPARP/HES1/MAPK14/VEGFA/FOXO3/CITED2/IMMP2L/GNRH1/ZFPM2	19
BP	GO:0006029	proteoglycan metabolic process	6/451	50/10468	0.0197585	0.954419	0.954419	EXT2/CHSY1/HS6ST1/HYAL1/PXYLP1/EGFLAM	6
BP	GO:0016446	somatic hypermutation of immunoglobulin genes	3/451	14/10468	0.0202816	0.954419	0.954419	UNG/PMS2/PMS2P1	3
BP	GO:0045823	positive regulation of heart contraction	3/451	14/10468	0.0202816	0.954419	0.954419	RNF207/NOS1AP/TPM1	3
BP	GO:0060716	labyrinthine layer blood vessel development	3/451	14/10468	0.0202816	0.954419	0.954419	TMED2/HS6ST1/HES1	3
BP	GO:0090110	cargo loading into COPII-coated vesicle	3/451	14/10468	0.0202816	0.954419	0.954419	SEC23A/SEC13/SEC24B	3
BP	GO:0006913	nucleocytoplasmic transport	20/451	283/10468	0.0204055	0.954419	0.954419	SRRM1/AHCYL1/PKD1/SMG1/YWHAE/NUP85/ANKLE1/SNRPG/POLDIP3/SEC13/LSG1/SDAD1/SMN1/SMN2/HSPA9/RBM22/CCHCR1/MAPK14/XPO7/GEMIN8	20
BP	GO:0045737	positive regulation of cyclin-dependent protein serine/threonine kinase activity	4/451	25/10468	0.0209612	0.954419	0.954419	CCND2/PKD1/CDC6/SPDYA	4
BP	GO:0051984	positive regulation of chromosome segregation	4/451	25/10468	0.0209612	0.954419	0.954419	SFPQ/FEN1/CDT1/CDC6	4
BP	GO:0090092	regulation of transmembrane receptor protein serine/threonine kinase signaling pathway	11/451	127/10468	0.0210307	0.954419	0.954419	NBL1/BAMBI/GDF11/SMURF2/DAND5/LTBP1/ACVR1/DLX1/HES1/CITED2/HIPK2	11
BP	GO:0006024	glycosaminoglycan biosynthetic process	7/451	65/10468	0.0212441	0.954419	0.954419	EXT2/GPC6/CHSY1/HS6ST1/GALNT5/HYAL1/PXYLP1	7
BP	GO:1902036	regulation of hematopoietic stem cell differentiation	7/451	65/10468	0.0212441	0.954419	0.954419	SETD1A/PSMD3/PSME4/RUNX1/HSPA9/PSMB8/MYB	7
BP	GO:0007548	sex differentiation	13/451	161/10468	0.0217157	0.954419	0.954419	ARID4B/CYP17A1/ATM/TYRO3/PKD1/CEBPB/TIPARP/VEGFA/FOXO3/CITED2/IMMP2L/GNRH1/ZFPM2	13
BP	GO:0045787	positive regulation of cell cycle	20/451	285/10468	0.0218262	0.954419	0.954419	SFPQ/PLK3/DTL/FEN1/ATM/CCND2/MEIS2/NUSAP1/PKD1/CDT1/CRLF3/ATAD5/CDC6/RPTOR/ARID3A/SPDYA/HYAL1/HES1/C6orf89/CITED2	20
BP	GO:0051169	nuclear transport	20/451	286/10468	0.0225646	0.954419	0.954419	SRRM1/AHCYL1/PKD1/SMG1/YWHAE/NUP85/ANKLE1/SNRPG/POLDIP3/SEC13/LSG1/SDAD1/SMN1/SMN2/HSPA9/RBM22/CCHCR1/MAPK14/XPO7/GEMIN8	20
BP	GO:0000387	spliceosomal snRNP assembly	5/451	38/10468	0.0225713	0.954419	0.954419	SART3/SNRPG/SMN1/SMN2/GEMIN8	5
BP	GO:0061326	renal tubule development	5/451	38/10468	0.0225713	0.954419	0.954419	ACAT1/PKD1/HES1/VEGFA/MYC	5
BP	GO:0072080	nephron tubule development	5/451	38/10468	0.0225713	0.954419	0.954419	ACAT1/PKD1/HES1/VEGFA/MYC	5
BP	GO:0003279	cardiac septum development	7/451	66/10468	0.0229162	0.954419	0.954419	DHRS3/DAND5/LTBP1/ACVR1/HES1/CITED2/ZFPM2	7
BP	GO:0003205	cardiac chamber development	9/451	97/10468	0.0236925	0.954419	0.954419	DHRS3/TPM1/TBX6/DAND5/LTBP1/ACVR1/HES1/CITED2/ZFPM2	9
BP	GO:0035176	social behavior	4/451	26/10468	0.0239526	0.954419	0.954419	EIF4EBP2/EN1/GAD1/PCM1	4
BP	GO:0051703	intraspecies interaction between organisms	4/451	26/10468	0.0239526	0.954419	0.954419	EIF4EBP2/EN1/GAD1/PCM1	4
BP	GO:0060412	ventricular septum morphogenesis	4/451	26/10468	0.0239526	0.954419	0.954419	ACVR1/HES1/CITED2/ZFPM2	4
BP	GO:0002566	somatic diversification of immune receptors via somatic mutation	3/451	15/10468	0.0245579	0.954419	0.954419	UNG/PMS2/PMS2P1	3
BP	GO:0006555	methionine metabolic process	3/451	15/10468	0.0245579	0.954419	0.954419	MTHFR/AHCYL1/AHCYL2	3
BP	GO:0046500	S-adenosylmethionine metabolic process	3/451	15/10468	0.0245579	0.954419	0.954419	MTHFR/AHCYL1/AHCYL2	3
BP	GO:0060306	regulation of membrane repolarization	3/451	15/10468	0.0245579	0.954419	0.954419	RNF207/NOS1AP/YWHAE	3
BP	GO:0099116	tRNA 5'-end processing	3/451	15/10468	0.0245579	0.954419	0.954419	THG1L/RPP21/POP7	3
BP	GO:0060411	cardiac septum morphogenesis	5/451	39/10468	0.0250045	0.954419	0.954419	DHRS3/ACVR1/HES1/CITED2/ZFPM2	5
BP	GO:1905269	positive regulation of chromatin organization	8/451	83/10468	0.0261749	0.954419	0.954419	ATM/SART3/BRD7/KAT7/C6orf89/VEGFA/MYB/PHF19	8
BP	GO:0006023	aminoglycan biosynthetic process	7/451	68/10468	0.0265284	0.954419	0.954419	EXT2/GPC6/CHSY1/HS6ST1/GALNT5/HYAL1/PXYLP1	7
BP	GO:0000083	regulation of transcription involved in G1/S transition of mitotic cell cycle	4/451	27/10468	0.0271896	0.954419	0.954419	ORC1/NPAT/CDT1/CDC6	4
BP	GO:0001656	metanephros development	5/451	40/10468	0.0276	0.954419	0.954419	ACAT1/GDF11/PKD1/HES1/MYC	5
BP	GO:0003143	embryonic heart tube morphogenesis	5/451	40/10468	0.0276	0.954419	0.954419	RNF207/TMED2/TBX6/ACVR1/HES1	5
BP	GO:0034035	purine ribonucleoside bisphosphate metabolic process	3/451	16/10468	0.0292807	0.954419	0.954419	HDDC3/SULT1A3/SULT1A4	3
BP	GO:0097150	neuronal stem cell population maintenance	3/451	16/10468	0.0292807	0.954419	0.954419	HES1/FOXO3/PCM1	3
BP	GO:2000737	negative regulation of stem cell differentiation	3/451	16/10468	0.0292807	0.954419	0.954419	ZFP36L2/HES1/HSPA9	3
BP	GO:0002200	somatic diversification of immune receptors	6/451	55/10468	0.030159	0.954419	0.954419	ATM/UNG/EXOSC6/ATAD5/PMS2/PMS2P1	6
BP	GO:0007389	pattern specification process	17/451	240/10468	0.0303569	0.954419	0.954419	RNF207/NBL1/GPR161/ATM/GDF11/TMED2/CHSY1/TBX6/BPTF/DAND5/EN1/ACVR1/DLX1/HES1/CITED2/HIPK2/EFNB1	17
BP	GO:0045599	negative regulation of fat cell differentiation	4/451	28/10468	0.0306752	0.954419	0.954419	SORT1/TRIB2/ZFP36L2/ZFPM2	4
BP	GO:1904031	positive regulation of cyclin-dependent protein kinase activity	4/451	28/10468	0.0306752	0.954419	0.954419	CCND2/PKD1/CDC6/SPDYA	4
BP	GO:0048608	reproductive structure development	18/451	259/10468	0.0310901	0.954419	0.954419	ARID4B/ATM/TMED2/TYRO3/PKD1/BPTF/EPOR/HS6ST1/CEBPB/TIPARP/HES1/MAPK14/VEGFA/FOXO3/CITED2/IMMP2L/GNRH1/ZFPM2	18
BP	GO:0044772	mitotic cell cycle phase transition	30/451	488/10468	0.0312168	0.954419	0.954419	CLSPN/PLK3/ORC1/ENSA/DTL/ECD/CUL5/NPAT/ATM/CCND2/AJUBA/PKD1/BRD7/CDT1/YWHAE/CRLF3/ATAD5/PSMD3/CDC6/RPTOR/ARID3A/SPDYA/ZFP36L2/PSME4/ACVR1/HYAL1/PSMB8/PRIM2/PCM1/MYC	30
BP	GO:0001892	embryonic placenta development	6/451	56/10468	0.0325985	0.954419	0.954419	TMED2/PKD1/BPTF/HS6ST1/CEBPB/HES1	6
BP	GO:1902750	negative regulation of cell cycle G2/M phase transition	8/451	87/10468	0.0334789	0.954419	0.954419	CLSPN/ORC1/DTL/ATM/PSMD3/CDC6/PSME4/PSMB8	8
BP	GO:0016226	iron-sulfur cluster assembly	3/451	17/10468	0.0344467	0.954419	0.954419	ISCU/NUBP1/HSPA9	3
BP	GO:0031163	metallo-sulfur cluster assembly	3/451	17/10468	0.0344467	0.954419	0.954419	ISCU/NUBP1/HSPA9	3
BP	GO:0099622	cardiac muscle cell membrane repolarization	3/451	17/10468	0.0344467	0.954419	0.954419	RNF207/NOS1AP/YWHAE	3
BP	GO:0060218	hematopoietic stem cell differentiation	7/451	72/10468	0.0348759	0.954419	0.954419	SETD1A/PSMD3/PSME4/RUNX1/HSPA9/PSMB8/MYB	7
BP	GO:0072006	nephron development	6/451	57/10468	0.0351627	0.954419	0.954419	ACAT1/PKD1/NUP85/HES1/VEGFA/MYC	6
BP	GO:0003002	regionalization	14/451	190/10468	0.03517	0.954419	0.954419	NBL1/GPR161/ATM/GDF11/TMED2/CHSY1/TBX6/BPTF/EN1/ACVR1/DLX1/HES1/CITED2/HIPK2	14
BP	GO:0045444	fat cell differentiation	11/451	138/10468	0.0358912	0.954419	0.954419	SORT1/GRK5/ZFP36/TRIB2/ZFP36L2/CEBPB/HES1/PSMB8/MAPK14/ARL4A/ZFPM2	11
BP	GO:0003006	developmental process involved in reproduction	24/451	377/10468	0.0359132	0.954419	0.954419	ARID4B/CYP17A1/ATM/TMED2/TYRO3/CATSPER2/PKD1/BPTF/PCSK4/EPOR/PSME4/HS6ST1/ACVR1/CEBPB/TIPARP/HES1/MAPK14/VEGFA/FOXO3/CITED2/IMMP2L/TTC26/GNRH1/ZFPM2	24
BP	GO:0048568	embryonic organ development	17/451	246/10468	0.0371336	0.954419	0.954419	RNF207/TMED2/PKD1/TBX6/BPTF/EN1/HS6ST1/ACVR1/CEBPB/HYAL1/TBC1D23/HES1/SEC24B/VEGFA/CITED2/HIPK2/ZFPM2	17
BP	GO:0034754	cellular hormone metabolic process	6/451	58/10468	0.0378533	0.954419	0.954419	DHRS3/HSD17B7/CYP17A1/HSD17B6/CYP2S1/TIPARP	6
BP	GO:0006195	purine nucleotide catabolic process	4/451	30/10468	0.0384014	0.954419	0.954419	ACOT7/ACAT1/HDDC3/HINT1	4
BP	GO:1900087	positive regulation of G1/S transition of mitotic cell cycle	4/451	30/10468	0.0384014	0.954419	0.954419	CCND2/CDC6/RPTOR/HYAL1	4
BP	GO:0031570	DNA integrity checkpoint	11/451	140/10468	0.03923	0.954419	0.954419	CLSPN/PLK3/ORC1/DTL/INTS7/ATM/CDT1/CDC6/ARID3A/CLOCK/MAPK14	11
BP	GO:0022407	regulation of cell-cell adhesion	15/451	211/10468	0.0392311	0.954419	0.954419	AP3D1/LRFN3/CEBPB/RUNX1/PPM1F/HES1/AGER/HLA-DPB1/MAPK14/VEGFA/TNFRSF21/MYB/CITED2/GNRH1/EFNB1	15
BP	GO:0072009	nephron epithelium development	5/451	44/10468	0.0396557	0.954419	0.954419	ACAT1/PKD1/HES1/VEGFA/MYC	5
BP	GO:0006488	dolichol-linked oligosaccharide biosynthetic process	3/451	18/10468	0.0400506	0.954419	0.954419	ALG9/DPAGT1/ALG10	3
BP	GO:0032799	low-density lipoprotein receptor particle metabolic process	3/451	18/10468	0.0400506	0.954419	0.954419	AP2S1/SCAP/MYLIP	3
BP	GO:0034471	ncRNA 5'-end processing	3/451	18/10468	0.0400506	0.954419	0.954419	THG1L/RPP21/POP7	3
BP	GO:0036507	protein demannosylation	3/451	18/10468	0.0400506	0.954419	0.954419	UGGT1/MAN1A1/RNF139	3
BP	GO:0036508	protein alpha-1,2-demannosylation	3/451	18/10468	0.0400506	0.954419	0.954419	UGGT1/MAN1A1/RNF139	3
BP	GO:1901099	negative regulation of signal transduction in absence of ligand	3/451	18/10468	0.0400506	0.954419	0.954419	IFI6/MCL1/UNC5B	3
BP	GO:2001240	negative regulation of extrinsic apoptotic signaling pathway in absence of ligand	3/451	18/10468	0.0400506	0.954419	0.954419	IFI6/MCL1/UNC5B	3
BP	GO:0036294	cellular response to decreased oxygen levels	12/451	158/10468	0.0402163	0.954419	0.954419	PLK3/AJUBA/PSMD3/NPEPPS/PSME4/CPEB4/PSMB8/VEGFA/FOXO3/CITED2/HIPK2/MYC	12
BP	GO:0001890	placenta development	8/451	91/10468	0.0420587	0.954419	0.954419	TMED2/PKD1/BPTF/EPOR/HS6ST1/CEBPB/HES1/MAPK14	8
BP	GO:0003231	cardiac ventricle development	7/451	75/10468	0.0421689	0.954419	0.954419	TPM1/DAND5/LTBP1/ACVR1/HES1/CITED2/ZFPM2	7
BP	GO:0036293	response to decreased oxygen levels	17/451	250/10468	0.0422262	0.954419	0.954419	MTHFR/PLK3/ATM/AJUBA/PSMD3/NPEPPS/PSME4/SCAP/CPEB4/AGER/PSMB8/VEGFA/FOXO3/MYB/CITED2/HIPK2/MYC	17
BP	GO:0072078	nephron tubule morphogenesis	4/451	31/10468	0.0426442	0.954419	0.954419	PKD1/HES1/VEGFA/MYC	4
BP	GO:0003007	heart morphogenesis	11/451	142/10468	0.0427793	0.954419	0.954419	RNF207/DHRS3/TMED2/TPM1/TBX6/ACVR1/HES1/SEC24B/VEGFA/CITED2/ZFPM2	11
BP	GO:0009166	nucleotide catabolic process	11/451	142/10468	0.0427793	0.954419	0.954419	ACOT7/HKDC1/ECD/ACAT1/UNG/NEIL1/HDDC3/ALDOC/NUP85/SEC13/HINT1	11
BP	GO:1902275	regulation of chromatin organization	11/451	142/10468	0.0427793	0.954419	0.954419	MTHFR/MKI67/ATM/SART3/SETD1A/BRD7/KAT7/C6orf89/VEGFA/MYB/PHF19	11
BP	GO:0072163	mesonephric epithelium development	5/451	45/10468	0.0430982	0.954419	0.954419	GDF11/PKD1/HES1/VEGFA/MYC	5
BP	GO:0072164	mesonephric tubule development	5/451	45/10468	0.0430982	0.954419	0.954419	GDF11/PKD1/HES1/VEGFA/MYC	5
BP	GO:0002244	hematopoietic progenitor cell differentiation	10/451	125/10468	0.0432573	0.954419	0.954419	SETD1A/PSMD3/EEF2/SIPA1L3/PSME4/RUNX1/HES1/HSPA9/PSMB8/MYB	10
BP	GO:0071479	cellular response to ionizing radiation	6/451	60/10468	0.0436198	0.954419	0.954419	INTS7/ATM/RAD51/RHOB/CLOCK/MAPK14	6
BP	GO:0030203	glycosaminoglycan metabolic process	8/451	92/10468	0.0444115	0.954419	0.954419	EXT2/GPC6/CHSY1/HS6ST1/GALNT5/HYAL1/PXYLP1/EGFLAM	8
BP	GO:0009799	specification of symmetry	7/451	76/10468	0.0448036	0.954419	0.954419	RNF207/NBL1/TMED2/TBX6/DAND5/ACVR1/CITED2	7
BP	GO:0009855	determination of bilateral symmetry	7/451	76/10468	0.0448036	0.954419	0.954419	RNF207/NBL1/TMED2/TBX6/DAND5/ACVR1/CITED2	7
BP	GO:0050670	regulation of lymphocyte proliferation	9/451	109/10468	0.0452919	0.954419	0.954419	ATM/ATAD5/CEBPB/HES1/AGER/HLA-DPB1/TNFRSF21/GNRH1/EFNB1	9
BP	GO:1903706	regulation of hemopoiesis	20/451	309/10468	0.0453929	0.954419	0.954419	ZNF683/AGO1/MEIS2/SETD1A/PSMD3/AP3D1/ZFP36/ZFP36L2/PSME4/CEBPB/RUNX1/HES1/HSPA9/AGER/PSMB8/MAPK14/FOXO3/MYB/TRIB1/MYC	20
BP	GO:0000966	RNA 5'-end processing	3/451	19/10468	0.0460847	0.954419	0.954419	THG1L/RPP21/POP7	3
BP	GO:0006490	oligosaccharide-lipid intermediate biosynthetic process	3/451	19/10468	0.0460847	0.954419	0.954419	ALG9/DPAGT1/ALG10	3
BP	GO:0034472	snRNA 3'-end processing	3/451	19/10468	0.0460847	0.954419	0.954419	INTS7/EXOSC6/EXOSC2	3
BP	GO:1900745	positive regulation of p38MAPK cascade	3/451	19/10468	0.0460847	0.954419	0.954419	AGER/VEGFA/GADD45G	3
BP	GO:0043523	regulation of neuron apoptotic process	11/451	144/10468	0.0465442	0.954419	0.954419	MCL1/UNC5B/ATM/TYRO3/EN1/DLX1/CEBPB/CPEB4/FOXO3/MYB/HIPK2	11
BP	GO:0045785	positive regulation of cell adhesion	15/451	216/10468	0.0465592	0.954419	0.954419	ATM/TPM1/AP3D1/RUNX1/PPM1F/HYAL1/HES1/EGFLAM/AGER/HLA-DPB1/VEGFA/MYB/CITED2/COL26A1/EFNB1	15
BP	GO:0072073	kidney epithelium development	6/451	61/10468	0.0466982	0.954419	0.954419	ACAT1/GDF11/PKD1/HES1/VEGFA/MYC	6
BP	GO:0001823	mesonephros development	5/451	46/10468	0.0467149	0.954419	0.954419	GDF11/PKD1/HES1/VEGFA/MYC	5
BP	GO:0061333	renal tubule morphogenesis	4/451	32/10468	0.0471405	0.954419	0.954419	PKD1/HES1/VEGFA/MYC	4
BP	GO:2000045	regulation of G1/S transition of mitotic cell cycle	10/451	127/10468	0.0473379	0.954419	0.954419	PLK3/ECD/ATM/CCND2/PKD1/BRD7/CDC6/RPTOR/ARID3A/HYAL1	10
BP	GO:0032944	regulation of mononuclear cell proliferation	9/451	110/10468	0.0475398	0.954419	0.954419	ATM/ATAD5/CEBPB/HES1/AGER/HLA-DPB1/TNFRSF21/GNRH1/EFNB1	9
BP	GO:0018209	peptidyl-serine modification	15/451	217/10468	0.0481332	0.954419	0.954419	CLSPN/MARK2/ATM/PWP1/PKD1/SMG1/RPTOR/SPTBN4/PLCL1/PPM1F/EGFLAM/MAPK14/MAPK13/VEGFA/HIPK2	15
BP	GO:0090287	regulation of cellular response to growth factor stimulus	11/451	145/10468	0.0485089	0.954419	0.954419	NBL1/BAMBI/SMURF2/DAND5/LTBP1/DLX1/HES1/FGF18/VEGFA/CITED2/HIPK2	11
BP	GO:0070085	glycosylation	13/451	181/10468	0.0490656	0.954419	0.954419	EXT2/TMEM258/ALG9/DPAGT1/ALG10/ST6GALNAC1/UGGT1/GALNT5/SDF2L1/TRAK1/XXYLT1/PIGZ/MAN1A1	13
BP	GO:0010972	negative regulation of G2/M transition of mitotic cell cycle	7/451	78/10468	0.0503847	0.954419	0.954419	CLSPN/ORC1/ATM/PSMD3/CDC6/PSME4/PSMB8	7
BP	GO:0030509	BMP signaling pathway	7/451	78/10468	0.0503847	0.954419	0.954419	NBL1/SMURF2/DAND5/ACVR1/DLX1/HES1/HIPK2	7
BP	GO:1903844	regulation of cellular response to transforming growth factor beta stimulus	7/451	78/10468	0.0503847	0.954419	0.954419	BAMBI/SMURF2/DAND5/LTBP1/DLX1/CITED2/HIPK2	7
BP	GO:0007062	sister chromatid cohesion	5/451	47/10468	0.0505065	0.954419	0.954419	SFPQ/FEN1/STAG1/BOD1/STAG3L2	5
BP	GO:0016445	somatic diversification of immunoglobulins	5/451	47/10468	0.0505065	0.954419	0.954419	UNG/EXOSC6/ATAD5/PMS2/PMS2P1	5
BP	GO:0072088	nephron epithelium morphogenesis	4/451	33/10468	0.0518894	0.954419	0.954419	PKD1/HES1/VEGFA/MYC	4
BP	GO:0072523	purine-containing compound catabolic process	4/451	33/10468	0.0518894	0.954419	0.954419	ACOT7/ACAT1/HDDC3/HINT1	4
BP	GO:1901292	nucleoside phosphate catabolic process	11/451	147/10468	0.0526056	0.954419	0.954419	ACOT7/HKDC1/ECD/ACAT1/UNG/NEIL1/HDDC3/ALDOC/NUP85/SEC13/HINT1	11
BP	GO:2001252	positive regulation of chromosome organization	11/451	147/10468	0.0526056	0.954419	0.954419	SFPQ/FEN1/ATM/SART3/BRD7/CDT1/KAT7/C6orf89/VEGFA/MYB/PHF19	11
BP	GO:0048863	stem cell differentiation	12/451	165/10468	0.0528996	0.954419	0.954419	PWP1/SETD1A/PSMD3/ZFP36L2/PSME4/ACVR1/RUNX1/HES1/HSPA9/PSMB8/MYB/EFNB1	12
BP	GO:1901989	positive regulation of cell cycle phase transition	7/451	79/10468	0.0533328	0.954419	0.954419	DTL/CCND2/CDT1/ATAD5/CDC6/RPTOR/HYAL1	7
BP	GO:0010817	regulation of hormone levels	17/451	258/10468	0.0538852	0.954419	0.954419	DHRS3/ENSA/UBE2Q1/HSD17B7/MPC2/GLUL/CYP17A1/CYP2R1/C2CD2L/HSD17B6/SNAP23/MIDN/PCSK4/CYP2S1/TIPARP/CLOCK/MYB	17
BP	GO:0030324	lung development	8/451	96/10468	0.0546809	0.954419	0.954419	PKD1/HS6ST1/HES1/SEC24B/FGF18/VEGFA/AIMP2/ZFPM2	8
BP	GO:1905330	regulation of morphogenesis of an epithelium	9/451	113/10468	0.0547234	0.954419	0.954419	RNF207/GPC6/PSMD3/SMURF2/AP2S1/PSME4/SEC24B/PSMB8/VEGFA	9
BP	GO:0071456	cellular response to hypoxia	11/451	148/10468	0.0547386	0.954419	0.954419	PLK3/AJUBA/PSMD3/NPEPPS/PSME4/PSMB8/VEGFA/FOXO3/CITED2/HIPK2/MYC	11
BP	GO:0009101	glycoprotein biosynthetic process	15/451	221/10468	0.0548026	0.954419	0.954419	EXT2/TMEM258/ALG9/DPAGT1/ALG10/CHSY1/ST6GALNAC1/UGGT1/HS6ST1/GALNT5/SDF2L1/TRAK1/PXYLP1/XXYLT1/MAN1A1	15
BP	GO:0098609	cell-cell adhesion	24/451	394/10468	0.0548078	0.954419	0.954419	PTPRF/CD58/ROBO3/AJUBA/TYRO3/PKD1/AP3D1/PIP5K1C/LRFN3/PAK4/ACVR1/CEBPB/RUNX1/PPM1F/HES1/AGER/HLA-DPB1/MAPK14/VEGFA/TNFRSF21/MYB/CITED2/GNRH1/EFNB1	24
BP	GO:0001666	response to hypoxia	16/451	240/10468	0.0552858	0.954419	0.954419	MTHFR/PLK3/ATM/AJUBA/PSMD3/NPEPPS/PSME4/SCAP/AGER/PSMB8/VEGFA/FOXO3/MYB/CITED2/HIPK2/MYC	16
BP	GO:0051249	regulation of lymphocyte activation	16/451	240/10468	0.0552858	0.954419	0.954419	ZNF683/ATM/TYRO3/EXOSC6/ATAD5/AP3D1/ZFP36L2/CEBPB/RUNX1/HES1/AGER/HLA-DPB1/TNFRSF21/MYB/GNRH1/EFNB1	16
BP	GO:0002474	antigen processing and presentation of peptide antigen via MHC class I	7/451	80/10468	0.0563868	0.954419	0.954419	SEC23A/SNAP23/PSMD3/PSME4/SEC13/SEC24B/PSMB8	7
BP	GO:0007601	visual perception	7/451	80/10468	0.0563868	0.954419	0.954419	DHRS3/BBS10/REEP6/OLFM2/ATXN7/CRYGS/RRH	7
BP	GO:0006270	DNA replication initiation	4/451	34/10468	0.0568895	0.954419	0.954419	ORC1/CDT1/CDC6/PRIM2	4
BP	GO:0072028	nephron morphogenesis	4/451	34/10468	0.0568895	0.954419	0.954419	PKD1/HES1/VEGFA/MYC	4
BP	GO:0051402	neuron apoptotic process	12/451	167/10468	0.0569711	0.954419	0.954419	MCL1/UNC5B/ATM/TYRO3/EN1/DLX1/CEBPB/CPEB4/TNFRSF21/FOXO3/MYB/HIPK2	12
BP	GO:0006022	aminoglycan metabolic process	8/451	97/10468	0.0574663	0.954419	0.954419	EXT2/GPC6/CHSY1/HS6ST1/GALNT5/HYAL1/PXYLP1/EGFLAM	8
BP	GO:0018105	peptidyl-serine phosphorylation	14/451	204/10468	0.0576724	0.954419	0.954419	CLSPN/MARK2/ATM/PWP1/PKD1/SMG1/RPTOR/SPTBN4/PLCL1/PPM1F/MAPK14/MAPK13/VEGFA/HIPK2	14
BP	GO:0031098	stress-activated protein kinase signaling cascade	14/451	204/10468	0.0576724	0.954419	0.954419	MAP4K5/KAT7/PAK4/ZFP36/TNIK/AGER/MAPK14/MAPK13/VEGFA/KLHDC10/HIPK2/TRIB1/MYC/GADD45G	14
BP	GO:0045638	negative regulation of myeloid cell differentiation	5/451	49/10468	0.0586158	0.954419	0.954419	MEIS2/ZFP36/HSPA9/TRIB1/MYC	5
BP	GO:0071453	cellular response to oxygen levels	12/451	168/10468	0.0590837	0.954419	0.954419	PLK3/AJUBA/PSMD3/NPEPPS/PSME4/CPEB4/PSMB8/VEGFA/FOXO3/CITED2/HIPK2/MYC	12
BP	GO:0015012	heparan sulfate proteoglycan biosynthetic process	3/451	21/10468	0.0594041	0.954419	0.954419	EXT2/HS6ST1/PXYLP1	3
BP	GO:0030204	chondroitin sulfate metabolic process	3/451	21/10468	0.0594041	0.954419	0.954419	CHSY1/HYAL1/EGFLAM	3
BP	GO:0032924	activin receptor signaling pathway	3/451	21/10468	0.0594041	0.954419	0.954419	DAND5/ACVR1/CITED2	3
BP	GO:0050873	brown fat cell differentiation	3/451	21/10468	0.0594041	0.954419	0.954419	CEBPB/MAPK14/ARL4A	3
BP	GO:0071675	regulation of mononuclear cell migration	3/451	21/10468	0.0594041	0.954419	0.954419	NBL1/AGER/MAPK14	3
BP	GO:0086009	membrane repolarization	3/451	21/10468	0.0594041	0.954419	0.954419	RNF207/NOS1AP/YWHAE	3
BP	GO:2000826	regulation of heart morphogenesis	3/451	21/10468	0.0594041	0.954419	0.954419	RNF207/ACVR1/HES1	3
BP	GO:0042129	regulation of T cell proliferation	7/451	81/10468	0.0595473	0.954419	0.954419	CEBPB/HES1/AGER/HLA-DPB1/TNFRSF21/GNRH1/EFNB1	7
BP	GO:0050953	sensory perception of light stimulus	7/451	81/10468	0.0595473	0.954419	0.954419	DHRS3/BBS10/REEP6/OLFM2/ATXN7/CRYGS/RRH	7
BP	GO:0031056	regulation of histone modification	9/451	115/10468	0.0598849	0.954419	0.954419	MTHFR/ATM/SART3/BRD7/KAT7/C6orf89/VEGFA/MYB/PHF19	9
BP	GO:0070663	regulation of leukocyte proliferation	9/451	115/10468	0.0598849	0.954419	0.954419	ATM/ATAD5/CEBPB/HES1/AGER/HLA-DPB1/TNFRSF21/GNRH1/EFNB1	9
BP	GO:0003206	cardiac chamber morphogenesis	6/451	65/10468	0.0603334	0.954419	0.954419	DHRS3/TPM1/ACVR1/HES1/CITED2/ZFPM2	6
BP	GO:0031016	pancreas development	4/451	35/10468	0.0621384	0.954419	0.954419	GDF11/MEIS2/HES1/CLOCK	4
BP	GO:0051145	smooth muscle cell differentiation	4/451	35/10468	0.0621384	0.954419	0.954419	OLFM2/ACVR1/HES1/VEGFA	4
BP	GO:0006903	vesicle targeting	7/451	82/10468	0.0628148	0.954419	0.954419	TMED2/SEC23A/SNAP23/GOSR1/SEC13/TBC1D23/SEC24B	7
BP	GO:0006397	mRNA processing	26/451	440/10468	0.0631326	0.954419	0.954419	CDK11A/CDK11B/SRRM1/SFPQ/PRPF38A/AHCYL1/TTF2/ECD/ZC3H10/SART3/ZC3H14/SNRPA1/NSRP1/SUPT5H/SF3B6/SNRNP27/PCBP1/SNRPG/USP39/POLDIP3/SMN1/SMN2/RBM22/PRKRIP1/TRUB2/GEMIN8	26
BP	GO:0030323	respiratory tube development	8/451	99/10468	0.0633029	0.954419	0.954419	PKD1/HS6ST1/HES1/SEC24B/FGF18/VEGFA/AIMP2/ZFPM2	8
BP	GO:0032103	positive regulation of response to external stimulus	11/451	152/10468	0.0638449	0.954419	0.954419	ARTN/PTGER3/GPRC5B/CEBPB/PPM1F/CLOCK/FGF18/AGER/MAPK14/MAPK13/VEGFA	11
BP	GO:0050921	positive regulation of chemotaxis	6/451	66/10468	0.0640751	0.954419	0.954419	ARTN/PPM1F/FGF18/AGER/MAPK14/VEGFA	6
BP	GO:1901992	positive regulation of mitotic cell cycle phase transition	6/451	66/10468	0.0640751	0.954419	0.954419	DTL/CCND2/CDT1/CDC6/RPTOR/HYAL1	6
BP	GO:0000956	nuclear-transcribed mRNA catabolic process	13/451	189/10468	0.0647833	0.954419	0.954419	RPL22/MRTO4/RPL11/AGO1/RPS27/ATM/RPL41/RPS29/SMG1/EXOSC6/ZFP36/ZFP36L2/EXOSC2	13
BP	GO:0006486	protein glycosylation	12/451	171/10468	0.0657326	0.954419	0.954419	EXT2/TMEM258/ALG9/DPAGT1/ALG10/ST6GALNAC1/UGGT1/GALNT5/SDF2L1/TRAK1/XXYLT1/MAN1A1	12
BP	GO:0043413	macromolecule glycosylation	12/451	171/10468	0.0657326	0.954419	0.954419	EXT2/TMEM258/ALG9/DPAGT1/ALG10/ST6GALNAC1/UGGT1/GALNT5/SDF2L1/TRAK1/XXYLT1/MAN1A1	12
BP	GO:0071772	response to BMP	7/451	83/10468	0.0661896	0.954419	0.954419	NBL1/SMURF2/DAND5/ACVR1/DLX1/HES1/HIPK2	7
BP	GO:0071773	cellular response to BMP stimulus	7/451	83/10468	0.0661896	0.954419	0.954419	NBL1/SMURF2/DAND5/ACVR1/DLX1/HES1/HIPK2	7
BP	GO:0090175	regulation of establishment of planar polarity	7/451	83/10468	0.0661896	0.954419	0.954419	GPC6/PSMD3/SMURF2/AP2S1/PSME4/SEC24B/PSMB8	7
BP	GO:0008406	gonad development	10/451	135/10468	0.0662191	0.954419	0.954419	ARID4B/ATM/CEBPB/TIPARP/VEGFA/FOXO3/CITED2/IMMP2L/GNRH1/ZFPM2	10
BP	GO:0006285	base-excision repair, AP site formation	2/451	10/10468	0.0662836	0.954419	0.954419	UNG/NEIL1	2
BP	GO:0007263	nitric oxide mediated signal transduction	2/451	10/10468	0.0662836	0.954419	0.954419	NOS1AP/VEGFA	2
BP	GO:0010842	retina layer formation	2/451	10/10468	0.0662836	0.954419	0.954419	FJX1/HIPK2	2
BP	GO:0015937	coenzyme A biosynthetic process	2/451	10/10468	0.0662836	0.954419	0.954419	ACOT7/ACAT1	2
BP	GO:0030852	regulation of granulocyte differentiation	2/451	10/10468	0.0662836	0.954419	0.954419	RUNX1/TRIB1	2
BP	GO:0031126	snoRNA 3'-end processing	2/451	10/10468	0.0662836	0.954419	0.954419	EXOSC6/EXOSC2	2
BP	GO:0034427	nuclear-transcribed mRNA catabolic process, exonucleolytic, 3'-5'	2/451	10/10468	0.0662836	0.954419	0.954419	EXOSC6/EXOSC2	2
BP	GO:0046498	S-adenosylhomocysteine metabolic process	2/451	10/10468	0.0662836	0.954419	0.954419	AHCYL1/AHCYL2	2
BP	GO:0048715	negative regulation of oligodendrocyte differentiation	2/451	10/10468	0.0662836	0.954419	0.954419	DLX1/HES1	2
BP	GO:0072574	hepatocyte proliferation	2/451	10/10468	0.0662836	0.954419	0.954419	RPS6KA1/CEBPB	2
BP	GO:0072575	epithelial cell proliferation involved in liver morphogenesis	2/451	10/10468	0.0662836	0.954419	0.954419	RPS6KA1/CEBPB	2
BP	GO:0098911	regulation of ventricular cardiac muscle cell action potential	2/451	10/10468	0.0662836	0.954419	0.954419	RNF207/NOS1AP	2
BP	GO:0099188	postsynaptic cytoskeleton organization	2/451	10/10468	0.0662836	0.954419	0.954419	NOS1AP/POTEKP	2
BP	GO:1900120	regulation of receptor binding	2/451	10/10468	0.0662836	0.954419	0.954419	PTPRF/PLCL1	2
BP	GO:2000194	regulation of female gonad development	2/451	10/10468	0.0662836	0.954419	0.954419	GNRH1/ZFPM2	2
BP	GO:2001026	regulation of endothelial cell chemotaxis	2/451	10/10468	0.0662836	0.954419	0.954419	FGF18/VEGFA	2
BP	GO:0006730	one-carbon metabolic process	3/451	22/10468	0.0666658	0.954419	0.954419	MTHFR/AHCYL1/AHCYL2	3
BP	GO:0016578	histone deubiquitination	3/451	22/10468	0.0666658	0.954419	0.954419	SART3/ATXN7L3/ATXN7	3
BP	GO:1903524	positive regulation of blood circulation	3/451	22/10468	0.0666658	0.954419	0.954419	RNF207/NOS1AP/TPM1	3
BP	GO:0002027	regulation of heart rate	4/451	36/10468	0.0676335	0.954419	0.954419	NOS1AP/TPM1/YWHAE/SPTBN4	4
BP	GO:0030166	proteoglycan biosynthetic process	4/451	36/10468	0.0676335	0.954419	0.954419	EXT2/CHSY1/HS6ST1/PXYLP1	4
BP	GO:0051236	establishment of RNA localization	12/451	172/10468	0.0680537	0.954419	0.954419	SRRM1/SFPQ/TOMM20/ATM/NPIPA1/SMG1/NUP85/ZFP36/POLDIP3/SEC13/SDAD1/XPO7	12
BP	GO:0045931	positive regulation of mitotic cell cycle	9/451	118/10468	0.0681951	0.954419	0.954419	DTL/CCND2/MEIS2/NUSAP1/CDT1/CDC6/RPTOR/HYAL1/HES1	9
BP	GO:0070482	response to oxygen levels	17/451	267/10468	0.0695001	0.954419	0.954419	MTHFR/PLK3/ATM/AJUBA/PSMD3/NPEPPS/PSME4/SCAP/CPEB4/AGER/PSMB8/VEGFA/FOXO3/MYB/CITED2/HIPK2/MYC	17
BP	GO:0010634	positive regulation of epithelial cell migration	7/451	84/10468	0.0696717	0.954419	0.954419	RHOB/AAMP/PPM1F/CAPN7/HYAL1/FGF18/VEGFA	7
BP	GO:0045637	regulation of myeloid cell differentiation	11/451	155/10468	0.0712879	0.954419	0.954419	AGO1/MEIS2/SETD1A/ZFP36/CEBPB/RUNX1/HSPA9/MAPK14/FOXO3/TRIB1/MYC	11
BP	GO:0048729	tissue morphogenesis	23/451	386/10468	0.071796	0.954419	0.954419	RNF207/MTHFR/ARTN/EXT2/TMED2/GPC6/AJUBA/TPM1/PKD1/TBX6/PSMD3/SMURF2/AP2S1/RHOB/PSME4/ACVR1/CRYGS/HES1/SEC24B/PSMB8/VEGFA/ZFPM2/MYC	23
BP	GO:0002683	negative regulation of immune system process	16/451	249/10468	0.0718661	0.954419	0.954419	NBL1/ATM/MEIS2/TYRO3/ZFP36/CEBPB/RUNX1/PARP14/HES1/HSPA9/MICB/TNFRSF21/GNRH1/TRIB1/MYC/LRRC14	16
BP	GO:0048469	cell maturation	8/451	102/10468	0.0727275	0.954419	0.954419	GDF11/CATSPER2/TBX6/PCSK4/SPTBN4/HES1/VEGFA/FOXO3	8
BP	GO:0090288	negative regulation of cellular response to growth factor stimulus	7/451	85/10468	0.0732614	0.954419	0.954419	NBL1/BAMBI/SMURF2/DAND5/LTBP1/DLX1/HIPK2	7
BP	GO:1903707	negative regulation of hemopoiesis	7/451	85/10468	0.0732614	0.954419	0.954419	MEIS2/ZFP36/RUNX1/HES1/HSPA9/TRIB1/MYC	7
BP	GO:0035735	intraciliary transport involved in cilium assembly	4/451	37/10468	0.0733713	0.954419	0.954419	IFT46/DYNLRB1/TTC26/PCM1	4
BP	GO:0030201	heparan sulfate proteoglycan metabolic process	3/451	23/10468	0.0743111	0.954419	0.954419	EXT2/HS6ST1/PXYLP1	3
BP	GO:0031572	G2 DNA damage checkpoint	3/451	23/10468	0.0743111	0.954419	0.954419	CLSPN/DTL/ATM	3
BP	GO:0019884	antigen processing and presentation of exogenous antigen	10/451	138/10468	0.0743868	0.954419	0.954419	SEC23A/SNAP23/PSMD3/AP3D1/AP2S1/PSME4/SEC13/SEC24B/PSMB8/HLA-DPB1	10
BP	GO:0045137	development of primary sexual characteristics	10/451	138/10468	0.0743868	0.954419	0.954419	ARID4B/ATM/CEBPB/TIPARP/VEGFA/FOXO3/CITED2/IMMP2L/GNRH1/ZFPM2	10
BP	GO:1902806	regulation of cell cycle G1/S phase transition	10/451	139/10468	0.0772436	0.954419	0.954419	PLK3/ECD/ATM/CCND2/PKD1/BRD7/CDC6/RPTOR/ARID3A/HYAL1	10
BP	GO:0001682	tRNA 5'-leader removal	2/451	11/10468	0.0787646	0.954419	0.954419	RPP21/POP7	2
BP	GO:0009109	coenzyme catabolic process	2/451	11/10468	0.0787646	0.954419	0.954419	ACOT7/ACAT1	2
BP	GO:0009650	UV protection	2/451	11/10468	0.0787646	0.954419	0.954419	FEN1/ERCC5	2
BP	GO:0023019	signal transduction involved in regulation of gene expression	2/451	11/10468	0.0787646	0.954419	0.954419	TBX6/DAND5	2
BP	GO:0036303	lymph vessel morphogenesis	2/451	11/10468	0.0787646	0.954419	0.954419	PKD1/VEGFA	2
BP	GO:0043144	snoRNA processing	2/451	11/10468	0.0787646	0.954419	0.954419	EXOSC6/EXOSC2	2
BP	GO:0048240	sperm capacitation	2/451	11/10468	0.0787646	0.954419	0.954419	CATSPER2/PCSK4	2
BP	GO:0060307	regulation of ventricular cardiac muscle cell membrane repolarization	2/451	11/10468	0.0787646	0.954419	0.954419	RNF207/NOS1AP	2
BP	GO:0060977	coronary vasculature morphogenesis	2/451	11/10468	0.0787646	0.954419	0.954419	SEC24B/VEGFA	2
BP	GO:0071712	ER-associated misfolded protein catabolic process	2/451	11/10468	0.0787646	0.954419	0.954419	UGGT1/SDF2L1	2
BP	GO:0072273	metanephric nephron morphogenesis	2/451	11/10468	0.0787646	0.954419	0.954419	PKD1/HES1	2
BP	GO:0072425	signal transduction involved in G2 DNA damage checkpoint	2/451	11/10468	0.0787646	0.954419	0.954419	DTL/ATM	2
BP	GO:0072576	liver morphogenesis	2/451	11/10468	0.0787646	0.954419	0.954419	RPS6KA1/CEBPB	2
BP	GO:2000047	regulation of cell-cell adhesion mediated by cadherin	2/451	11/10468	0.0787646	0.954419	0.954419	PPM1F/VEGFA	2
BP	GO:0045646	regulation of erythrocyte differentiation	4/451	38/10468	0.0793478	0.954419	0.954419	ZFP36/HSPA9/MAPK14/FOXO3	4
BP	GO:0061371	determination of heart left/right asymmetry	4/451	38/10468	0.0793478	0.954419	0.954419	RNF207/TMED2/TBX6/DAND5	4
BP	GO:1990089	response to nerve growth factor	4/451	38/10468	0.0793478	0.954419	0.954419	SORT1/ARPC3/EEF2/FOXO3	4
BP	GO:1990090	cellular response to nerve growth factor stimulus	4/451	38/10468	0.0793478	0.954419	0.954419	SORT1/ARPC3/EEF2/FOXO3	4
BP	GO:0030155	regulation of cell adhesion	22/451	371/10468	0.0801079	0.954419	0.954419	ATM/TPM1/PKD1/AP3D1/LRFN3/CEBPB/RUNX1/PPM1F/PLXNB1/HYAL1/HES1/EGFLAM/AGER/HLA-DPB1/MAPK14/VEGFA/TNFRSF21/MYB/CITED2/COL26A1/GNRH1/EFNB1	22
BP	GO:0006720	isoprenoid metabolic process	6/451	70/10468	0.0803745	0.954419	0.954419	DHRS3/GGPS1/DPAGT1/GPC6/CYP2S1/COQ2	6
BP	GO:0007368	determination of left/right symmetry	6/451	70/10468	0.0803745	0.954419	0.954419	RNF207/TMED2/TBX6/DAND5/ACVR1/CITED2	6
BP	GO:0034404	nucleobase-containing small molecule biosynthetic process	12/451	177/10468	0.0804563	0.954419	0.954419	ACOT7/HKDC1/ECD/ACAT1/UNG/NEIL1/HDDC3/APRT/ALDOC/NUP85/SEC13/HINT1	12
BP	GO:0090068	positive regulation of cell cycle process	14/451	215/10468	0.0810928	0.954419	0.954419	SFPQ/PLK3/DTL/FEN1/ATM/CCND2/NUSAP1/CDT1/CRLF3/ATAD5/CDC6/RPTOR/ARID3A/HYAL1	14
BP	GO:0033260	nuclear DNA replication	5/451	54/10468	0.0819376	0.954419	0.954419	FEN1/RAD51/CDT1/ATAD5/PRIM2	5
BP	GO:0016180	snRNA processing	3/451	24/10468	0.0823254	0.954419	0.954419	INTS7/EXOSC6/EXOSC2	3
BP	GO:0030851	granulocyte differentiation	3/451	24/10468	0.0823254	0.954419	0.954419	LBR/RUNX1/TRIB1	3
BP	GO:0048713	regulation of oligodendrocyte differentiation	3/451	24/10468	0.0823254	0.954419	0.954419	DLX1/HES1/TNFRSF21	3
BP	GO:0006790	sulfur compound metabolic process	16/451	254/10468	0.0823766	0.954419	0.954419	ACOT7/MTHFR/GSTM3/AHCYL1/MPC2/ACAT1/ISCU/CHSY1/NUBP1/ACSM3/SULT1A3/SULT1A4/HYAL1/EGFLAM/HSPA9/AHCYL2	16
BP	GO:0042445	hormone metabolic process	8/451	105/10468	0.08296	0.954419	0.954419	DHRS3/HSD17B7/CYP17A1/CYP2R1/HSD17B6/PCSK4/CYP2S1/TIPARP	8
BP	GO:0009314	response to radiation	19/451	313/10468	0.0830359	0.954419	0.954419	PLK3/DTL/INTS7/CYP2R1/FEN1/ATM/ERCC5/MEIS2/RAD51/REEP6/RHOB/DYNLRB1/HYAL1/CLOCK/RRH/MAPK14/MAPK13/MYC/GNAQ	19
BP	GO:0006626	protein targeting to mitochondrion	7/451	88/10468	0.0846746	0.954419	0.954419	TOMM20/TIMM8B/NPEPPS/TIMM44/SAE1/CHCHD4/IMMP2L	7
BP	GO:0030101	natural killer cell activation	4/451	39/10468	0.0855585	0.954419	0.954419	ZNF683/TYRO3/MICB/ULBP2	4
BP	GO:1902808	positive regulation of cell cycle G1/S phase transition	4/451	39/10468	0.0855585	0.954419	0.954419	CCND2/CDC6/RPTOR/HYAL1	4
BP	GO:1903845	negative regulation of cellular response to transforming growth factor beta stimulus	5/451	55/10468	0.0871155	0.954419	0.954419	BAMBI/SMURF2/DAND5/LTBP1/DLX1	5
BP	GO:0045766	positive regulation of angiogenesis	7/451	89/10468	0.0886928	0.954419	0.954419	PAK4/RHOB/RUNX1/HYAL1/FGF18/VEGFA/HIPK2	7
BP	GO:0032653	regulation of interleukin-10 production	3/451	25/10468	0.0906933	0.954419	0.954419	TRIB2/AGER/TNFRSF21	3
BP	GO:2001239	regulation of extrinsic apoptotic signaling pathway in absence of ligand	3/451	25/10468	0.0906933	0.954419	0.954419	IFI6/MCL1/UNC5B	3
BP	GO:0006596	polyamine biosynthetic process	2/451	12/10468	0.0919042	0.954419	0.954419	SRM/ODC1	2
BP	GO:0008298	intracellular mRNA localization	2/451	12/10468	0.0919042	0.954419	0.954419	ZFP36/EXOSC2	2
BP	GO:0009223	pyrimidine deoxyribonucleotide catabolic process	2/451	12/10468	0.0919042	0.954419	0.954419	UNG/NEIL1	2
BP	GO:0014912	negative regulation of smooth muscle cell migration	2/451	12/10468	0.0919042	0.954419	0.954419	TPM1/TRIB1	2
BP	GO:0030728	ovulation	2/451	12/10468	0.0919042	0.954419	0.954419	FOXO3/IMMP2L	2
BP	GO:0032802	low-density lipoprotein particle receptor catabolic process	2/451	12/10468	0.0919042	0.954419	0.954419	AP2S1/MYLIP	2
BP	GO:0035883	enteroendocrine cell differentiation	2/451	12/10468	0.0919042	0.954419	0.954419	HES1/CLOCK	2
BP	GO:0043649	dicarboxylic acid catabolic process	2/451	12/10468	0.0919042	0.954419	0.954419	GLUL/GAD1	2
BP	GO:0045408	regulation of interleukin-6 biosynthetic process	2/451	12/10468	0.0919042	0.954419	0.954419	CEBPB/AGER	2
BP	GO:0045954	positive regulation of natural killer cell mediated cytotoxicity	2/451	12/10468	0.0919042	0.954419	0.954419	MICB/ULBP2	2
BP	GO:0048311	mitochondrion distribution	2/451	12/10468	0.0919042	0.954419	0.954419	MSTO1/TRAK1	2
BP	GO:0099623	regulation of cardiac muscle cell membrane repolarization	2/451	12/10468	0.0919042	0.954419	0.954419	RNF207/NOS1AP	2
BP	GO:0099625	ventricular cardiac muscle cell membrane repolarization	2/451	12/10468	0.0919042	0.954419	0.954419	RNF207/NOS1AP	2
BP	GO:1901018	positive regulation of potassium ion transmembrane transporter activity	2/451	12/10468	0.0919042	0.954419	0.954419	RNF207/NOS1AP	2
BP	GO:0032945	negative regulation of mononuclear cell proliferation	4/451	40/10468	0.0919983	0.954419	0.954419	ATM/CEBPB/TNFRSF21/GNRH1	4
BP	GO:0050672	negative regulation of lymphocyte proliferation	4/451	40/10468	0.0919983	0.954419	0.954419	ATM/CEBPB/TNFRSF21/GNRH1	4
BP	GO:0060993	kidney morphogenesis	4/451	40/10468	0.0919983	0.954419	0.954419	PKD1/HES1/VEGFA/MYC	4
BP	GO:0071478	cellular response to radiation	10/451	144/10468	0.0925391	0.954419	0.954419	INTS7/ATM/RAD51/RHOB/HYAL1/CLOCK/RRH/MAPK14/MAPK13/MYC	10
BP	GO:0034728	nucleosome organization	7/451	90/10468	0.0928171	0.954419	0.954419	SMARCC2/SART3/OIP5/ASF1B/PSME4/CENPC/SHPRH	7
BP	GO:0060964	regulation of gene silencing by miRNA	6/451	73/10468	0.0939838	0.954419	0.954419	AGO1/ZC3H10/AJUBA/NUP85/ZFP36/SEC13	6
BP	GO:0051403	stress-activated MAPK cascade	12/451	182/10468	0.0942018	0.954419	0.954419	MAP4K5/ZFP36/TNIK/AGER/MAPK14/MAPK13/VEGFA/KLHDC10/HIPK2/TRIB1/MYC/GADD45G	12
BP	GO:0098742	cell-cell adhesion via plasma-membrane adhesion molecules	7/451	91/10468	0.0970469	0.954419	0.954419	PTPRF/ROBO3/AJUBA/PKD1/LRFN3/ACVR1/MAPK14	7
BP	GO:0016055	Wnt signaling pathway	20/451	340/10468	0.0976605	0.954419	0.954419	AGO1/BAMBI/GRK5/MARK2/GPC6/TYRO3/PKD1/GPRC5B/BRD7/PSMD3/SMURF2/AP2S1/PSME4/USP34/RUNX1/TNIK/PSMB8/MAPK14/FOXO3/GNAQ	20
BP	GO:0001764	neuron migration	6/451	74/10468	0.0987791	0.954419	0.954419	MARK2/YWHAE/IGSF10/VEGFA/PCM1/GNRH1	6
BP	GO:0001913	T cell mediated cytotoxicity	3/451	26/10468	0.0993986	0.954419	0.954419	AGER/MICB/ULBP2	3
BP	GO:0006418	tRNA aminoacylation for protein translation	3/451	26/10468	0.0993986	0.954419	0.954419	YARS2/PPA2/AIMP2	3
BP	GO:0006517	protein deglycosylation	3/451	26/10468	0.0993986	0.954419	0.954419	UGGT1/MAN1A1/RNF139	3
BP	GO:0009584	detection of visible light	3/451	26/10468	0.0993986	0.954419	0.954419	REEP6/RRH/GNAQ	3
BP	GO:0060563	neuroepithelial cell differentiation	3/451	26/10468	0.0993986	0.954419	0.954419	CEBPB/HES1/SEC24B	3
BP	GO:0060675	ureteric bud morphogenesis	3/451	26/10468	0.0993986	0.954419	0.954419	HES1/VEGFA/MYC	3
BP	GO:0060711	labyrinthine layer development	3/451	26/10468	0.0993986	0.954419	0.954419	TMED2/HS6ST1/HES1	3
BP	GO:0072171	mesonephric tubule morphogenesis	3/451	26/10468	0.0993986	0.954419	0.954419	HES1/VEGFA/MYC	3
BP	GO:0097502	mannosylation	3/451	26/10468	0.0993986	0.954419	0.954419	ALG9/SDF2L1/PIGZ	3
BP	GO:0198738	cell-cell signaling by wnt	20/451	341/10468	0.0998099	0.954419	0.954419	AGO1/BAMBI/GRK5/MARK2/GPC6/TYRO3/PKD1/GPRC5B/BRD7/PSMD3/SMURF2/AP2S1/PSME4/USP34/RUNX1/TNIK/PSMB8/MAPK14/FOXO3/GNAQ	20
BP	GO:0000819	sister chromatid segregation	11/451	165/10468	0.0999728	0.954419	0.954419	SFPQ/MSTO1/FEN1/ATM/NUSAP1/CDT1/CDC6/STAG1/CENPC/BOD1/STAG3L2	11
BP	GO:0071824	protein-DNA complex subunit organization	12/451	184/10468	0.100078	0.954419	0.954419	SMARCC2/SART3/ERCC5/RAD51/OIP5/CDT1/ASF1B/PSME4/CENPC/SHPRH/MYC/POLR1E	12
BP	GO:0006614	SRP-dependent cotranslational protein targeting to membrane	7/451	92/10468	0.101382	0.954419	0.954419	RPL22/RPL11/RPS27/SRP9/RPL41/RPS29/SRP14	7
BP	GO:0006399	tRNA metabolic process	11/451	166/10468	0.103171	0.954419	0.954419	YARS2/ELP6/TRMT10A/PPA2/THG1L/RPP21/CDKAL1/AIMP2/POP7/METTL2B/EXOSC2	11
BP	GO:0030856	regulation of epithelial cell differentiation	6/451	75/10468	0.103702	0.954419	0.954419	ZFP36/CEBPB/RUNX1/HES1/CLOCK/VEGFA	6
BP	GO:1901990	regulation of mitotic cell cycle phase transition	21/451	363/10468	0.103794	0.954419	0.954419	CLSPN/PLK3/ORC1/DTL/ECD/ATM/CCND2/PKD1/BRD7/CDT1/YWHAE/ATAD5/PSMD3/CDC6/RPTOR/ARID3A/ZFP36L2/PSME4/HYAL1/PSMB8/PCM1	21
BP	GO:0006403	RNA localization	13/451	205/10468	0.105399	0.954419	0.954419	SRRM1/SFPQ/TOMM20/ATM/NPIPA1/SMG1/NUP85/ZFP36/POLDIP3/SEC13/SDAD1/XPO7/EXOSC2	13
BP	GO:0008089	anterograde axonal transport	4/451	42/10468	0.105543	0.954419	0.954419	AP3S2/SPG7/AP3D1/TRAK1	4
BP	GO:0042446	hormone biosynthetic process	4/451	42/10468	0.105543	0.954419	0.954419	HSD17B7/CYP17A1/CYP2R1/HSD17B6	4
BP	GO:0001779	natural killer cell differentiation	2/451	13/10468	0.105623	0.954419	0.954419	ZNF683/TYRO3	2
BP	GO:0002053	positive regulation of mesenchymal cell proliferation	2/451	13/10468	0.105623	0.954419	0.954419	VEGFA/MYC	2
BP	GO:0002717	positive regulation of natural killer cell mediated immunity	2/451	13/10468	0.105623	0.954419	0.954419	MICB/ULBP2	2
BP	GO:0003338	metanephros morphogenesis	2/451	13/10468	0.105623	0.954419	0.954419	PKD1/HES1	2
BP	GO:0006244	pyrimidine nucleotide catabolic process	2/451	13/10468	0.105623	0.954419	0.954419	UNG/NEIL1	2
BP	GO:0006268	DNA unwinding involved in DNA replication	2/451	13/10468	0.105623	0.954419	0.954419	RAD51/RECQL4	2
BP	GO:0007530	sex determination	2/451	13/10468	0.105623	0.954419	0.954419	CITED2/GNRH1	2
BP	GO:0009084	glutamine family amino acid biosynthetic process	2/451	13/10468	0.105623	0.954419	0.954419	GLUL/PYCR2	2
BP	GO:0010984	regulation of lipoprotein particle clearance	2/451	13/10468	0.105623	0.954419	0.954419	LRPAP1/MYLIP	2
BP	GO:0030033	microvillus assembly	2/451	13/10468	0.105623	0.954419	0.954419	RAP1GAP/TNIK	2
BP	GO:0035278	miRNA mediated inhibition of translation	2/451	13/10468	0.105623	0.954419	0.954419	AGO1/ZFP36	2
BP	GO:0040033	negative regulation of translation, ncRNA-mediated	2/451	13/10468	0.105623	0.954419	0.954419	AGO1/ZFP36	2
BP	GO:0042226	interleukin-6 biosynthetic process	2/451	13/10468	0.105623	0.954419	0.954419	CEBPB/AGER	2
BP	GO:0042559	pteridine-containing compound biosynthetic process	2/451	13/10468	0.105623	0.954419	0.954419	SPR/PCBD2	2
BP	GO:0042790	nucleolar large rRNA transcription by RNA polymerase I	2/451	13/10468	0.105623	0.954419	0.954419	PWP1/POLR1E	2
BP	GO:0045056	transcytosis	2/451	13/10468	0.105623	0.954419	0.954419	LRPAP1/AGER	2
BP	GO:0045686	negative regulation of glial cell differentiation	2/451	13/10468	0.105623	0.954419	0.954419	DLX1/HES1	2
BP	GO:0045974	regulation of translation, ncRNA-mediated	2/451	13/10468	0.105623	0.954419	0.954419	AGO1/ZFP36	2
BP	GO:0060037	pharyngeal system development	2/451	13/10468	0.105623	0.954419	0.954419	ACVR1/HES1	2
BP	GO:0060628	regulation of ER to Golgi vesicle-mediated transport	2/451	13/10468	0.105623	0.954419	0.954419	SEC24B/RNF139	2
BP	GO:0061158	3'-UTR-mediated mRNA destabilization	2/451	13/10468	0.105623	0.954419	0.954419	ZFP36/ZFP36L2	2
BP	GO:0070935	3'-UTR-mediated mRNA stabilization	2/451	13/10468	0.105623	0.954419	0.954419	ZFP36/MAPK14	2
BP	GO:0071027	nuclear RNA surveillance	2/451	13/10468	0.105623	0.954419	0.954419	EXOSC6/EXOSC2	2
BP	GO:0071028	nuclear mRNA surveillance	2/451	13/10468	0.105623	0.954419	0.954419	EXOSC6/EXOSC2	2
BP	GO:0032874	positive regulation of stress-activated MAPK cascade	7/451	93/10468	0.10582	0.954419	0.954419	MAP4K5/TNIK/AGER/VEGFA/KLHDC10/HIPK2/GADD45G	7
BP	GO:0042770	signal transduction in response to DNA damage	8/451	111/10468	0.105838	0.954419	0.954419	PLK3/DTL/ATM/ATAD5/ARID3A/MAPK14/FOXO3/HIPK2	8
BP	GO:0033044	regulation of chromosome organization	17/451	284/10468	0.1067	0.954419	0.954419	MTHFR/SFPQ/MKI67/FEN1/ATM/SART3/SMG1/SETD1A/BRD7/CDT1/CDC6/KAT7/C6orf89/VEGFA/MYB/MYC/PHF19	17
BP	GO:0002009	morphogenesis of an epithelium	19/451	324/10468	0.106742	0.954419	0.954419	RNF207/MTHFR/TMED2/GPC6/AJUBA/PKD1/TBX6/PSMD3/SMURF2/AP2S1/RHOB/PSME4/ACVR1/CRYGS/HES1/SEC24B/PSMB8/VEGFA/MYC	19
BP	GO:0009880	embryonic pattern specification	3/451	27/10468	0.108425	0.954419	0.954419	TMED2/TBX6/EFNB1	3
BP	GO:0031440	regulation of mRNA 3'-end processing	3/451	27/10468	0.108425	0.954419	0.954419	AHCYL1/ZC3H14/SUPT5H	3
BP	GO:0032613	interleukin-10 production	3/451	27/10468	0.108425	0.954419	0.954419	TRIB2/AGER/TNFRSF21	3
BP	GO:0042558	pteridine-containing compound metabolic process	3/451	27/10468	0.108425	0.954419	0.954419	MTHFR/SPR/PCBD2	3
BP	GO:0051084	'de novo' posttranslational protein folding	3/451	27/10468	0.108425	0.954419	0.954419	UGGT1/CHCHD4/HSPA9	3
BP	GO:1900744	regulation of p38MAPK cascade	3/451	27/10468	0.108425	0.954419	0.954419	AGER/VEGFA/GADD45G	3
BP	GO:0017015	regulation of transforming growth factor beta receptor signaling pathway	6/451	76/10468	0.10875	0.954419	0.954419	BAMBI/SMURF2/DAND5/LTBP1/CITED2/HIPK2	6
BP	GO:0060147	regulation of posttranscriptional gene silencing	6/451	76/10468	0.10875	0.954419	0.954419	AGO1/ZC3H10/AJUBA/NUP85/ZFP36/SEC13	6
BP	GO:0060966	regulation of gene silencing by RNA	6/451	76/10468	0.10875	0.954419	0.954419	AGO1/ZC3H10/AJUBA/NUP85/ZFP36/SEC13	6
BP	GO:0046634	regulation of alpha-beta T cell activation	5/451	59/10468	0.109472	0.954419	0.954419	ZNF683/AP3D1/RUNX1/AGER/MYB	5
BP	GO:0060541	respiratory system development	8/451	112/10468	0.10996	0.954419	0.954419	PKD1/HS6ST1/HES1/SEC24B/FGF18/VEGFA/AIMP2/ZFPM2	8
BP	GO:0070304	positive regulation of stress-activated protein kinase signaling cascade	7/451	94/10468	0.110362	0.954419	0.954419	MAP4K5/TNIK/AGER/VEGFA/KLHDC10/HIPK2/GADD45G	7
BP	GO:1901988	negative regulation of cell cycle phase transition	13/451	207/10468	0.111356	0.954419	0.954419	CLSPN/PLK3/ORC1/DTL/ATM/BRD7/CDT1/PSMD3/CDC6/ARID3A/ZFP36L2/PSME4/PSMB8	13
BP	GO:0009953	dorsal/ventral pattern formation	4/451	43/10468	0.112636	0.954419	0.954419	NBL1/GPR161/EN1/ACVR1	4
BP	GO:0043525	positive regulation of neuron apoptotic process	4/451	43/10468	0.112636	0.954419	0.954419	MCL1/ATM/FOXO3/MYB	4
BP	GO:0070664	negative regulation of leukocyte proliferation	4/451	43/10468	0.112636	0.954419	0.954419	ATM/CEBPB/TNFRSF21/GNRH1	4
BP	GO:0050657	nucleic acid transport	11/451	169/10468	0.113122	0.954419	0.954419	SRRM1/SFPQ/TOMM20/NPIPA1/SMG1/NUP85/ZFP36/POLDIP3/SEC13/SDAD1/XPO7	11
BP	GO:0050658	RNA transport	11/451	169/10468	0.113122	0.954419	0.954419	SRRM1/SFPQ/TOMM20/NPIPA1/SMG1/NUP85/ZFP36/POLDIP3/SEC13/SDAD1/XPO7	11
BP	GO:0002377	immunoglobulin production	6/451	77/10468	0.113923	0.954419	0.954419	ATM/UNG/EXOSC6/ATAD5/PMS2/PMS2P1	6
BP	GO:0001736	establishment of planar polarity	7/451	95/10468	0.115006	0.954419	0.954419	GPC6/PSMD3/SMURF2/AP2S1/PSME4/SEC24B/PSMB8	7
BP	GO:0007164	establishment of tissue polarity	7/451	95/10468	0.115006	0.954419	0.954419	GPC6/PSMD3/SMURF2/AP2S1/PSME4/SEC24B/PSMB8	7
BP	GO:0006334	nucleosome assembly	5/451	60/10468	0.115458	0.954419	0.954419	SART3/OIP5/ASF1B/CENPC/SHPRH	5
BP	GO:0008088	axo-dendritic transport	5/451	60/10468	0.115458	0.954419	0.954419	SFPQ/AP3S2/SPG7/AP3D1/TRAK1	5
BP	GO:1901214	regulation of neuron death	13/451	209/10468	0.117508	0.954419	0.954419	MCL1/UNC5B/ATM/TYRO3/SULT1A3/EN1/DLX1/CEBPB/CPEB4/FOXO3/MYB/AIMP2/HIPK2	13
BP	GO:0021532	neural tube patterning	3/451	28/10468	0.117755	0.954419	0.954419	GPR161/EN1/HES1	3
BP	GO:0051693	actin filament capping	3/451	28/10468	0.117755	0.954419	0.954419	LMOD1/SPTBN4/CAPG	3
BP	GO:1901016	regulation of potassium ion transmembrane transporter activity	3/451	28/10468	0.117755	0.954419	0.954419	RNF207/NOS1AP/YWHAE	3
BP	GO:0010608	posttranscriptional regulation of gene expression	27/451	493/10468	0.118083	0.954419	0.954419	RPL22/RPS6KA1/AGO1/NSUN4/SRP9/DNAJC1/EIF4EBP2/ZC3H10/AJUBA/ZC3H14/EXOSC6/PSMD3/NUP85/EEF2/CDC37/ZFP36/ZFP36L2/PSME4/POLDIP3/SEC13/CPEB4/PSMB8/MAPK14/FOXO3/RNF139/TRUB2/EXOSC2	27
BP	GO:0006613	cotranslational protein targeting to membrane	7/451	96/10468	0.11975	0.954419	0.954419	RPL22/RPL11/RPS27/SRP9/RPL41/RPS29/SRP14	7
BP	GO:0006595	polyamine metabolic process	2/451	14/10468	0.119846	0.954419	0.954419	SRM/ODC1	2
BP	GO:0007095	mitotic G2 DNA damage checkpoint	2/451	14/10468	0.119846	0.954419	0.954419	CLSPN/ATM	2
BP	GO:0007628	adult walking behavior	2/451	14/10468	0.119846	0.954419	0.954419	SPTBN4/HIPK2	2
BP	GO:0032925	regulation of activin receptor signaling pathway	2/451	14/10468	0.119846	0.954419	0.954419	DAND5/ACVR1	2
BP	GO:0035767	endothelial cell chemotaxis	2/451	14/10468	0.119846	0.954419	0.954419	FGF18/VEGFA	2
BP	GO:0042401	cellular biogenic amine biosynthetic process	2/451	14/10468	0.119846	0.954419	0.954419	SRM/ODC1	2
BP	GO:0001657	ureteric bud development	4/451	44/10468	0.119934	0.954419	0.954419	GDF11/HES1/VEGFA/MYC	4
BP	GO:0046637	regulation of alpha-beta T cell differentiation	4/451	44/10468	0.119934	0.954419	0.954419	ZNF683/AP3D1/RUNX1/MYB	4
BP	GO:0030336	negative regulation of cell migration	9/451	133/10468	0.120099	0.954419	0.954419	NBL1/TPM1/RHOB/FOXO3/CITED2/GNRH1/TRIB1/SCAI/RAP2C	9
BP	GO:0001568	blood vessel development	21/451	372/10468	0.12434	0.954419	0.954419	AGO1/GLUL/UNC5B/TMED2/PKD1/PAK4/RHOB/LTBP1/HS6ST1/ACVR1/AAMP/RUNX1/HYAL1/TIPARP/HES1/SEC24B/FGF18/MAPK14/VEGFA/HIPK2/ZFPM2	21
BP	GO:0001944	vasculature development	22/451	393/10468	0.125483	0.954419	0.954419	AGO1/GLUL/UNC5B/TMED2/PKD1/PAK4/RHOB/LTBP1/HS6ST1/ACVR1/AAMP/RUNX1/HYAL1/TIPARP/HES1/SEC24B/FGF18/MAPK14/VEGFA/IMMP2L/HIPK2/ZFPM2	22
BP	GO:0046165	alcohol biosynthetic process	8/451	116/10468	0.127307	0.954419	0.954419	HSD17B7/LBR/GGPS1/CYP2R1/SPR/PLCL1/SCAP/PCBD2	8
BP	GO:0003407	neural retina development	3/451	29/10468	0.127371	0.954419	0.954419	FJX1/DLX1/HIPK2	3
BP	GO:0008608	attachment of spindle microtubules to kinetochore	3/451	29/10468	0.127371	0.954419	0.954419	CDT1/CENPC/BOD1	3
BP	GO:0009583	detection of light stimulus	3/451	29/10468	0.127371	0.954419	0.954419	REEP6/RRH/GNAQ	3
BP	GO:0043039	tRNA aminoacylation	3/451	29/10468	0.127371	0.954419	0.954419	YARS2/PPA2/AIMP2	3
BP	GO:0071674	mononuclear cell migration	3/451	29/10468	0.127371	0.954419	0.954419	NBL1/AGER/MAPK14	3
BP	GO:0002562	somatic diversification of immune receptors via germline recombination within a single locus	4/451	45/10468	0.127431	0.954419	0.954419	ATM/UNG/EXOSC6/ATAD5	4
BP	GO:0016444	somatic cell DNA recombination	4/451	45/10468	0.127431	0.954419	0.954419	ATM/UNG/EXOSC6/ATAD5	4
BP	GO:0038034	signal transduction in absence of ligand	4/451	45/10468	0.127431	0.954419	0.954419	IFI6/MCL1/UNC5B/FOXO3	4
BP	GO:0097192	extrinsic apoptotic signaling pathway in absence of ligand	4/451	45/10468	0.127431	0.954419	0.954419	IFI6/MCL1/UNC5B/FOXO3	4
BP	GO:1904035	regulation of epithelial cell apoptotic process	4/451	45/10468	0.127431	0.954419	0.954419	SORT1/PAK4/ZFP36/FOXO3	4
BP	GO:0034605	cellular response to heat	7/451	98/10468	0.129537	0.954419	0.954419	CLPB/ATM/YWHAE/NUP85/RPTOR/SEC13/HSPA9	7
BP	GO:0043524	negative regulation of neuron apoptotic process	7/451	98/10468	0.129537	0.954419	0.954419	UNC5B/TYRO3/EN1/DLX1/CEBPB/CPEB4/HIPK2	7
BP	GO:0033135	regulation of peptidyl-serine phosphorylation	6/451	80/10468	0.130166	0.954419	0.954419	PWP1/RPTOR/SPTBN4/PLCL1/PPM1F/VEGFA	6
BP	GO:0097529	myeloid leukocyte migration	6/451	80/10468	0.130166	0.954419	0.954419	NBL1/NUP85/PIP5K1C/AGER/MAPK14/VEGFA	6
BP	GO:0050863	regulation of T cell activation	11/451	174/10468	0.130884	0.954419	0.954419	ZNF683/AP3D1/CEBPB/RUNX1/HES1/AGER/HLA-DPB1/TNFRSF21/MYB/GNRH1/EFNB1	11
BP	GO:0045927	positive regulation of growth	10/451	155/10468	0.132074	0.954419	0.954419	RPS6KA1/RPTOR/SPTBN4/PPM1F/HYAL1/ZNF639/MAPK14/VEGFA/ZFPM2/EXOSC2	10
BP	GO:0030334	regulation of cell migration	25/451	458/10468	0.132208	0.954419	0.954419	NBL1/GLUL/ATM/AJUBA/TPM1/SMURF2/RHOB/ACVR1/AAMP/PPM1F/CAPN7/ELP6/PLXNB1/HYAL1/IGSF10/FGF18/AGER/MAPK14/VEGFA/FOXO3/CITED2/GNRH1/TRIB1/SCAI/RAP2C	25
BP	GO:0002478	antigen processing and presentation of exogenous peptide antigen	9/451	136/10468	0.132515	0.954419	0.954419	SEC23A/SNAP23/PSMD3/AP2S1/PSME4/SEC13/SEC24B/PSMB8/HLA-DPB1	9
BP	GO:0007178	transmembrane receptor protein serine/threonine kinase signaling pathway	12/451	194/10468	0.13267	0.954419	0.954419	NBL1/BAMBI/GDF11/SMURF2/DAND5/LTBP1/ACVR1/DLX1/HES1/MAPK14/CITED2/HIPK2	12
BP	GO:0034333	adherens junction assembly	5/451	63/10468	0.13432	0.954419	0.954419	TESK2/AJUBA/PIP5K1C/PPM1F/VEGFA	5
BP	GO:0090100	positive regulation of transmembrane receptor protein serine/threonine kinase signaling pathway	5/451	63/10468	0.13432	0.954419	0.954419	GDF11/ACVR1/HES1/CITED2/HIPK2	5
BP	GO:0001709	cell fate determination	2/451	15/10468	0.134506	0.954419	0.954419	MCL1/HES1	2
BP	GO:0001945	lymph vessel development	2/451	15/10468	0.134506	0.954419	0.954419	PKD1/VEGFA	2
BP	GO:0003156	regulation of animal organ formation	2/451	15/10468	0.134506	0.954419	0.954419	HES1/CITED2	2
BP	GO:0006744	ubiquinone biosynthetic process	2/451	15/10468	0.134506	0.954419	0.954419	COQ2/COQ4	2
BP	GO:0009309	amine biosynthetic process	2/451	15/10468	0.134506	0.954419	0.954419	SRM/ODC1	2
BP	GO:0015936	coenzyme A metabolic process	2/451	15/10468	0.134506	0.954419	0.954419	ACOT7/ACAT1	2
BP	GO:0016074	snoRNA metabolic process	2/451	15/10468	0.134506	0.954419	0.954419	EXOSC6/EXOSC2	2
BP	GO:0031065	positive regulation of histone deacetylation	2/451	15/10468	0.134506	0.954419	0.954419	C6orf89/VEGFA	2
BP	GO:0048246	macrophage chemotaxis	2/451	15/10468	0.134506	0.954419	0.954419	NUP85/MAPK14	2
BP	GO:0050427	3'-phosphoadenosine 5'-phosphosulfate metabolic process	2/451	15/10468	0.134506	0.954419	0.954419	SULT1A3/SULT1A4	2
BP	GO:0050650	chondroitin sulfate proteoglycan biosynthetic process	2/451	15/10468	0.134506	0.954419	0.954419	CHSY1/PXYLP1	2
BP	GO:0051894	positive regulation of focal adhesion assembly	2/451	15/10468	0.134506	0.954419	0.954419	PPM1F/VEGFA	2
BP	GO:0071025	RNA surveillance	2/451	15/10468	0.134506	0.954419	0.954419	EXOSC6/EXOSC2	2
BP	GO:0072210	metanephric nephron development	2/451	15/10468	0.134506	0.954419	0.954419	PKD1/HES1	2
BP	GO:1901663	quinone biosynthetic process	2/451	15/10468	0.134506	0.954419	0.954419	COQ2/COQ4	2
BP	GO:1904380	endoplasmic reticulum mannose trimming	2/451	15/10468	0.134506	0.954419	0.954419	UGGT1/RNF139	2
BP	GO:0060071	Wnt signaling pathway, planar cell polarity pathway	6/451	81/10468	0.135816	0.954419	0.954419	GPC6/PSMD3/SMURF2/AP2S1/PSME4/PSMB8	6
BP	GO:0050684	regulation of mRNA processing	8/451	118/10468	0.136484	0.954419	0.954419	CDK11A/CDK11B/AHCYL1/ZC3H10/SART3/ZC3H14/NSRP1/SUPT5H	8
BP	GO:0006261	DNA-dependent DNA replication	9/451	137/10468	0.136798	0.954419	0.954419	ORC1/FEN1/CDK2AP1/RAD51/CDT1/ATAD5/CDC6/PRIM2/RECQL4	9
BP	GO:0071902	positive regulation of protein serine/threonine kinase activity	13/451	215/10468	0.13712	0.954419	0.954419	CCND2/AJUBA/MAP4K5/PKD1/CDC6/RPTOR/SPDYA/TNIK/FGF18/AGER/MAPK14/VEGFA/GADD45G	13
BP	GO:0014009	glial cell proliferation	3/451	30/10468	0.137257	0.954419	0.954419	EEF2/HES1/MYB	3
BP	GO:0043038	amino acid activation	3/451	30/10468	0.137257	0.954419	0.954419	YARS2/PPA2/AIMP2	3
BP	GO:0044839	cell cycle G2/M phase transition	14/451	235/10468	0.137472	0.954419	0.954419	CLSPN/PLK3/ORC1/ENSA/DTL/ATM/AJUBA/YWHAE/ATAD5/PSMD3/CDC6/PSME4/PSMB8/PCM1	14
BP	GO:0072358	cardiovascular system development	22/451	399/10468	0.140119	0.954419	0.954419	AGO1/GLUL/UNC5B/TMED2/PKD1/PAK4/RHOB/LTBP1/HS6ST1/ACVR1/AAMP/RUNX1/HYAL1/TIPARP/HES1/SEC24B/FGF18/MAPK14/VEGFA/IMMP2L/HIPK2/ZFPM2	22
BP	GO:0070997	neuron death	14/451	236/10468	0.140756	0.954419	0.954419	MCL1/UNC5B/ATM/TYRO3/SULT1A3/EN1/DLX1/CEBPB/CPEB4/TNFRSF21/FOXO3/MYB/AIMP2/HIPK2	14
BP	GO:0044786	cell cycle DNA replication	5/451	64/10468	0.140896	0.954419	0.954419	FEN1/RAD51/CDT1/ATAD5/PRIM2	5
BP	GO:0046632	alpha-beta T cell differentiation	5/451	64/10468	0.140896	0.954419	0.954419	RPL22/ZNF683/AP3D1/RUNX1/MYB	5
BP	GO:0007411	axon guidance	9/451	138/10468	0.141152	0.954419	0.954419	RAP1GAP/ARTN/UNC5B/ROBO3/SPTBN4/PLXNB1/VEGFA/DOK2/EFNB1	9
BP	GO:0097485	neuron projection guidance	9/451	138/10468	0.141152	0.954419	0.954419	RAP1GAP/ARTN/UNC5B/ROBO3/SPTBN4/PLXNB1/VEGFA/DOK2/EFNB1	9
BP	GO:0051250	negative regulation of lymphocyte activation	6/451	82/10468	0.141579	0.954419	0.954419	ATM/TYRO3/CEBPB/RUNX1/TNFRSF21/GNRH1	6
BP	GO:0019080	viral gene expression	11/451	177/10468	0.142231	0.954419	0.954419	RPL22/RPL11/RPS27/EIF2D/RPL41/RPS29/NUP85/ZFP36/SUPT5H/SEC13/ZNF639	11
BP	GO:0042102	positive regulation of T cell proliferation	4/451	47/10468	0.142989	0.954419	0.954419	HES1/AGER/HLA-DPB1/EFNB1	4
BP	GO:1903311	regulation of mRNA metabolic process	16/451	277/10468	0.143051	0.954419	0.954419	CDK11A/CDK11B/AHCYL1/ZC3H10/SART3/ZC3H14/EXOSC6/NSRP1/PSMD3/ZFP36/SUPT5H/ZFP36L2/PSME4/PSMB8/MAPK14/EXOSC2	16
BP	GO:1901991	negative regulation of mitotic cell cycle phase transition	12/451	197/10468	0.143469	0.954419	0.954419	CLSPN/PLK3/ORC1/ATM/BRD7/CDT1/PSMD3/CDC6/ARID3A/ZFP36L2/PSME4/PSMB8	12
BP	GO:0006402	mRNA catabolic process	18/451	318/10468	0.143849	0.954419	0.954419	RPL22/MRTO4/RPL11/AGO1/RPS27/ATM/RPL41/RPS29/ZC3H14/SMG1/EXOSC6/PSMD3/ZFP36/ZFP36L2/PSME4/PSMB8/MAPK14/EXOSC2	18
BP	GO:0022618	ribonucleoprotein complex assembly	13/451	217/10468	0.144036	0.954419	0.954419	MRTO4/RPL11/AGO1/NSUN4/RPS27/EIF2D/ATM/SART3/SNRPG/USP39/SMN1/SMN2/GEMIN8	13
BP	GO:1904018	positive regulation of vasculature development	7/451	101/10468	0.144941	0.954419	0.954419	PAK4/RHOB/RUNX1/HYAL1/FGF18/VEGFA/HIPK2	7
BP	GO:0009952	anterior/posterior pattern specification	8/451	120/10468	0.145986	0.954419	0.954419	ATM/GDF11/TMED2/TBX6/BPTF/EN1/HES1/HIPK2	8
BP	GO:0006458	'de novo' protein folding	3/451	31/10468	0.147394	0.954419	0.954419	UGGT1/CHCHD4/HSPA9	3
BP	GO:0030835	negative regulation of actin filament depolymerization	3/451	31/10468	0.147394	0.954419	0.954419	LMOD1/SPTBN4/CAPG	3
BP	GO:0044273	sulfur compound catabolic process	3/451	31/10468	0.147394	0.954419	0.954419	ACOT7/ACAT1/HYAL1	3
BP	GO:0060976	coronary vasculature development	3/451	31/10468	0.147394	0.954419	0.954419	LTBP1/SEC24B/VEGFA	3
BP	GO:0031503	protein-containing complex localization	14/451	238/10468	0.147453	0.954419	0.954419	SRRM1/SFPQ/ATM/IFT46/GPC6/SMG1/NUP85/AP3D1/DYNLRB1/POLDIP3/SEC13/SDAD1/TTC26/PCM1	14
BP	GO:0034332	adherens junction organization	6/451	83/10468	0.147453	0.954419	0.954419	TESK2/AJUBA/PIP5K1C/PPM1F/CADM2/VEGFA	6
BP	GO:0003230	cardiac atrium development	2/451	16/10468	0.149538	0.954419	0.954419	DAND5/ACVR1	2
BP	GO:0006516	glycoprotein catabolic process	2/451	16/10468	0.149538	0.954419	0.954419	FBXO2/FBXO44	2
BP	GO:0006534	cysteine metabolic process	2/451	16/10468	0.149538	0.954419	0.954419	AHCYL1/AHCYL2	2
BP	GO:0006743	ubiquinone metabolic process	2/451	16/10468	0.149538	0.954419	0.954419	COQ2/COQ4	2
BP	GO:0008210	estrogen metabolic process	2/451	16/10468	0.149538	0.954419	0.954419	HSD17B7/TIPARP	2
BP	GO:0032897	negative regulation of viral transcription	2/451	16/10468	0.149538	0.954419	0.954419	ZFP36/ZNF639	2
BP	GO:0034312	diol biosynthetic process	2/451	16/10468	0.149538	0.954419	0.954419	SPR/PCBD2	2
BP	GO:0042491	inner ear auditory receptor cell differentiation	2/451	16/10468	0.149538	0.954419	0.954419	HES1/SEC24B	2
BP	GO:0043981	histone H4-K5 acetylation	2/451	16/10468	0.149538	0.954419	0.954419	KANSL2/KAT7	2
BP	GO:0043982	histone H4-K8 acetylation	2/451	16/10468	0.149538	0.954419	0.954419	KANSL2/KAT7	2
BP	GO:0044331	cell-cell adhesion mediated by cadherin	2/451	16/10468	0.149538	0.954419	0.954419	PPM1F/VEGFA	2
BP	GO:0045830	positive regulation of isotype switching	2/451	16/10468	0.149538	0.954419	0.954419	EXOSC6/ATAD5	2
BP	GO:0060045	positive regulation of cardiac muscle cell proliferation	2/451	16/10468	0.149538	0.954419	0.954419	MAPK14/ZFPM2	2
BP	GO:0060122	inner ear receptor cell stereocilium organization	2/451	16/10468	0.149538	0.954419	0.954419	HES1/SEC24B	2
BP	GO:0070131	positive regulation of mitochondrial translation	2/451	16/10468	0.149538	0.954419	0.954419	NSUN4/TRUB2	2
BP	GO:0086005	ventricular cardiac muscle cell action potential	2/451	16/10468	0.149538	0.954419	0.954419	RNF207/NOS1AP	2
BP	GO:0090659	walking behavior	2/451	16/10468	0.149538	0.954419	0.954419	SPTBN4/HIPK2	2
BP	GO:1900363	regulation of mRNA polyadenylation	2/451	16/10468	0.149538	0.954419	0.954419	ZC3H14/SUPT5H	2
BP	GO:1903523	negative regulation of blood circulation	2/451	16/10468	0.149538	0.954419	0.954419	SPTBN4/AGER	2
BP	GO:1904385	cellular response to angiotensin	2/451	16/10468	0.149538	0.954419	0.954419	AHCYL1/CDC6	2
BP	GO:0048514	blood vessel morphogenesis	18/451	320/10468	0.149665	0.954419	0.954419	AGO1/GLUL/UNC5B/PAK4/RHOB/HS6ST1/ACVR1/AAMP/RUNX1/HYAL1/TIPARP/HES1/SEC24B/FGF18/MAPK14/VEGFA/HIPK2/ZFPM2	18
BP	GO:0001822	kidney development	9/451	140/10468	0.15007	0.954419	0.954419	ACAT1/GDF11/PKD1/NUP85/ODC1/TIPARP/HES1/VEGFA/MYC	9
BP	GO:0010970	transport along microtubule	9/451	140/10468	0.15007	0.954419	0.954419	SFPQ/IFT46/AP3S2/SPG7/AP3D1/DYNLRB1/TRAK1/TTC26/PCM1	9
BP	GO:0099111	microtubule-based transport	9/451	140/10468	0.15007	0.954419	0.954419	SFPQ/IFT46/AP3S2/SPG7/AP3D1/DYNLRB1/TRAK1/TTC26/PCM1	9
BP	GO:2000146	negative regulation of cell motility	9/451	140/10468	0.15007	0.954419	0.954419	NBL1/TPM1/RHOB/FOXO3/CITED2/GNRH1/TRIB1/SCAI/RAP2C	9
BP	GO:0046631	alpha-beta T cell activation	6/451	84/10468	0.153437	0.954419	0.954419	RPL22/ZNF683/AP3D1/RUNX1/AGER/MYB	6
BP	GO:0006401	RNA catabolic process	19/451	342/10468	0.153776	0.954419	0.954419	RPL22/MRTO4/RPL11/AGO1/RPS27/FEN1/ATM/RPL41/RPS29/ZC3H14/SMG1/EXOSC6/PSMD3/ZFP36/ZFP36L2/PSME4/PSMB8/MAPK14/EXOSC2	19
BP	GO:0006487	protein N-linked glycosylation	5/451	66/10468	0.154456	0.954419	0.954419	TMEM258/ALG9/DPAGT1/ALG10/UGGT1	5
BP	GO:0048199	vesicle targeting, to, from or within Golgi	5/451	66/10468	0.154456	0.954419	0.954419	TMED2/SEC23A/GOSR1/SEC13/SEC24B	5
BP	GO:0050671	positive regulation of lymphocyte proliferation	5/451	66/10468	0.154456	0.954419	0.954419	ATAD5/HES1/AGER/HLA-DPB1/EFNB1	5
BP	GO:0000086	G2/M transition of mitotic cell cycle	13/451	220/10468	0.154756	0.954419	0.954419	CLSPN/PLK3/ORC1/ENSA/DTL/ATM/AJUBA/YWHAE/PSMD3/CDC6/PSME4/PSMB8/PCM1	13
BP	GO:0002694	regulation of leukocyte activation	16/451	281/10468	0.155646	0.954419	0.954419	ZNF683/ATM/TYRO3/EXOSC6/ATAD5/AP3D1/ZFP36L2/CEBPB/RUNX1/HES1/AGER/HLA-DPB1/TNFRSF21/MYB/GNRH1/EFNB1	16
BP	GO:0033865	nucleoside bisphosphate metabolic process	7/451	103/10468	0.155673	0.954419	0.954419	ACOT7/MPC2/ACAT1/HDDC3/ACSM3/SULT1A3/SULT1A4	7
BP	GO:0033875	ribonucleoside bisphosphate metabolic process	7/451	103/10468	0.155673	0.954419	0.954419	ACOT7/MPC2/ACAT1/HDDC3/ACSM3/SULT1A3/SULT1A4	7
BP	GO:0034032	purine nucleoside bisphosphate metabolic process	7/451	103/10468	0.155673	0.954419	0.954419	ACOT7/MPC2/ACAT1/HDDC3/ACSM3/SULT1A3/SULT1A4	7
BP	GO:0050920	regulation of chemotaxis	7/451	103/10468	0.155673	0.954419	0.954419	NBL1/ARTN/PPM1F/FGF18/AGER/MAPK14/VEGFA	7
BP	GO:0010212	response to ionizing radiation	8/451	122/10468	0.155804	0.954419	0.954419	INTS7/CYP2R1/ATM/RAD51/RHOB/CLOCK/MAPK14/MYC	8
BP	GO:0070848	response to growth factor	23/451	426/10468	0.155953	0.954419	0.954419	NBL1/SORT1/BAMBI/ARPC3/MEIS2/SMURF2/EEF2/DAND5/ZFP36/LTBP1/ZFP36L2/ACVR1/DLX1/HYAL1/HES1/FGF18/MAPK14/FRS3/VEGFA/FOXO3/CITED2/HIPK2/MYC	23
BP	GO:0000096	sulfur amino acid metabolic process	3/451	32/10468	0.157765	0.954419	0.954419	MTHFR/AHCYL1/AHCYL2	3
BP	GO:0042130	negative regulation of T cell proliferation	3/451	32/10468	0.157765	0.954419	0.954419	CEBPB/TNFRSF21/GNRH1	3
BP	GO:0048146	positive regulation of fibroblast proliferation	3/451	32/10468	0.157765	0.954419	0.954419	CDC6/MYB/MYC	3
BP	GO:0086001	cardiac muscle cell action potential	3/451	32/10468	0.157765	0.954419	0.954419	RNF207/NOS1AP/YWHAE	3
BP	GO:1901987	regulation of cell cycle phase transition	21/451	385/10468	0.158042	0.954419	0.954419	CLSPN/PLK3/ORC1/DTL/ECD/ATM/CCND2/PKD1/BRD7/CDT1/YWHAE/ATAD5/PSMD3/CDC6/RPTOR/ARID3A/ZFP36L2/PSME4/HYAL1/PSMB8/PCM1	21
BP	GO:0042073	intraciliary transport	4/451	49/10468	0.15925	0.954419	0.954419	IFT46/DYNLRB1/TTC26/PCM1	4
BP	GO:0009408	response to heat	8/451	123/10468	0.160829	0.954419	0.954419	CLPB/ATM/YWHAE/NUP85/RPTOR/SEC13/HSPA9/MICB	8
BP	GO:0072655	establishment of protein localization to mitochondrion	8/451	123/10468	0.160829	0.954419	0.954419	TOMM20/TIMM8B/YWHAE/NPEPPS/TIMM44/SAE1/CHCHD4/IMMP2L	8
BP	GO:0045047	protein targeting to ER	7/451	104/10468	0.161173	0.954419	0.954419	RPL22/RPL11/RPS27/SRP9/RPL41/RPS29/SRP14	7
BP	GO:0090263	positive regulation of canonical Wnt signaling pathway	7/451	104/10468	0.161173	0.954419	0.954419	BAMBI/GPRC5B/PSMD3/SMURF2/PSME4/USP34/PSMB8	7
BP	GO:1903037	regulation of leukocyte cell-cell adhesion	10/451	162/10468	0.161275	0.954419	0.954419	AP3D1/CEBPB/RUNX1/HES1/AGER/HLA-DPB1/TNFRSF21/MYB/GNRH1/EFNB1	10
BP	GO:0032946	positive regulation of mononuclear cell proliferation	5/451	67/10468	0.161433	0.954419	0.954419	ATAD5/HES1/AGER/HLA-DPB1/EFNB1	5
BP	GO:0050729	positive regulation of inflammatory response	5/451	67/10468	0.161433	0.954419	0.954419	PTGER3/GPRC5B/CEBPB/CLOCK/MAPK13	5
BP	GO:1901216	positive regulation of neuron death	5/451	67/10468	0.161433	0.954419	0.954419	MCL1/ATM/FOXO3/MYB/AIMP2	5
BP	GO:0050865	regulation of cell activation	17/451	304/10468	0.163644	0.954419	0.954419	ZNF683/RPS6KA1/ATM/TYRO3/EXOSC6/ATAD5/AP3D1/ZFP36L2/CEBPB/RUNX1/HES1/AGER/HLA-DPB1/TNFRSF21/MYB/GNRH1/EFNB1	17
BP	GO:0009743	response to carbohydrate	9/451	143/10468	0.163958	0.954419	0.954419	ENSA/MPC2/GLUL/C2CD2L/CDT1/KAT7/AGER/MAPK13/FOXO3	9
BP	GO:0006953	acute-phase response	2/451	17/10468	0.164884	0.954419	0.954419	PTGER3/CEBPB	2
BP	GO:0009065	glutamine family amino acid catabolic process	2/451	17/10468	0.164884	0.954419	0.954419	GLUL/GAD1	2
BP	GO:0016075	rRNA catabolic process	2/451	17/10468	0.164884	0.954419	0.954419	EXOSC6/EXOSC2	2
BP	GO:0031954	positive regulation of protein autophosphorylation	2/451	17/10468	0.164884	0.954419	0.954419	VEGFA/RAP2C	2
BP	GO:0035886	vascular smooth muscle cell differentiation	2/451	17/10468	0.164884	0.954419	0.954419	HES1/VEGFA	2
BP	GO:0042269	regulation of natural killer cell mediated cytotoxicity	2/451	17/10468	0.164884	0.954419	0.954419	MICB/ULBP2	2
BP	GO:0048490	anterograde synaptic vesicle transport	2/451	17/10468	0.164884	0.954419	0.954419	AP3S2/AP3D1	2
BP	GO:0070262	peptidyl-serine dephosphorylation	2/451	17/10468	0.164884	0.954419	0.954419	YWHAE/PPM1F	2
BP	GO:0098901	regulation of cardiac muscle cell action potential	2/451	17/10468	0.164884	0.954419	0.954419	RNF207/NOS1AP	2
BP	GO:0099514	synaptic vesicle cytoskeletal transport	2/451	17/10468	0.164884	0.954419	0.954419	AP3S2/AP3D1	2
BP	GO:0099517	synaptic vesicle transport along microtubule	2/451	17/10468	0.164884	0.954419	0.954419	AP3S2/AP3D1	2
BP	GO:1900151	regulation of nuclear-transcribed mRNA catabolic process, deadenylation-dependent decay	2/451	17/10468	0.164884	0.954419	0.954419	ZFP36/ZFP36L2	2
BP	GO:1900153	positive regulation of nuclear-transcribed mRNA catabolic process, deadenylation-dependent decay	2/451	17/10468	0.164884	0.954419	0.954419	ZFP36/ZFP36L2	2
BP	GO:1904646	cellular response to amyloid-beta	2/451	17/10468	0.164884	0.954419	0.954419	AGER/FOXO3	2
BP	GO:0019083	viral transcription	10/451	163/10468	0.165688	0.954419	0.954419	RPL22/RPL11/RPS27/RPL41/RPS29/NUP85/ZFP36/SUPT5H/SEC13/ZNF639	10
BP	GO:0007041	lysosomal transport	6/451	86/10468	0.165718	0.954419	0.954419	SORT1/VPS18/EPG5/AP3D1/RHOB/TRAK1	6
BP	GO:0031146	SCF-dependent proteasomal ubiquitin-dependent protein catabolic process	6/451	86/10468	0.165718	0.954419	0.954419	FBXO2/FBXO44/CUL5/PSMD3/PSME4/PSMB8	6
BP	GO:0016579	protein deubiquitination	13/451	223/10468	0.165883	0.954419	0.954419	CLSPN/TOMM20/DESI2/SART3/PSMD3/ATXN7L3/SMURF2/PSME4/USP34/USP39/ATXN7/PSMB8/MYC	13
BP	GO:0006323	DNA packaging	7/451	105/10468	0.16676	0.954419	0.954419	SART3/OIP5/NUSAP1/ASF1B/PSME4/CENPC/SHPRH	7
BP	GO:0042098	T cell proliferation	7/451	105/10468	0.16676	0.954419	0.954419	CEBPB/HES1/AGER/HLA-DPB1/TNFRSF21/GNRH1/EFNB1	7
BP	GO:0048232	male gamete generation	17/451	305/10468	0.166854	0.954419	0.954419	TESK2/ARID4B/DUSP13/ATM/HERC2/TYRO3/CATSPER2/SNRPA1/SPATA20/PCSK4/ASF1B/SPDYA/PSME4/CLOCK/IMMP2L/TTC26/SPATA31C1	17
BP	GO:0060840	artery development	4/451	50/10468	0.167626	0.954419	0.954419	LTBP1/HES1/SEC24B/VEGFA	4
BP	GO:0001910	regulation of leukocyte mediated cytotoxicity	3/451	33/10468	0.168352	0.954419	0.954419	AGER/MICB/ULBP2	3
BP	GO:0002204	somatic recombination of immunoglobulin genes involved in immune response	3/451	33/10468	0.168352	0.954419	0.954419	UNG/EXOSC6/ATAD5	3
BP	GO:0002208	somatic diversification of immunoglobulins involved in immune response	3/451	33/10468	0.168352	0.954419	0.954419	UNG/EXOSC6/ATAD5	3
BP	GO:0045190	isotype switching	3/451	33/10468	0.168352	0.954419	0.954419	UNG/EXOSC6/ATAD5	3
BP	GO:0032092	positive regulation of protein binding	5/451	68/10468	0.168534	0.954419	0.954419	RPL11/BAMBI/PKD1/PLCL1/HIPK2	5
BP	GO:1900034	regulation of cellular response to heat	5/451	68/10468	0.168534	0.954419	0.954419	ATM/YWHAE/NUP85/RPTOR/SEC13	5
BP	GO:0046651	lymphocyte proliferation	9/451	144/10468	0.168719	0.954419	0.954419	ATM/ATAD5/CEBPB/HES1/AGER/HLA-DPB1/TNFRSF21/GNRH1/EFNB1	9
BP	GO:0048002	antigen processing and presentation of peptide antigen	9/451	144/10468	0.168719	0.954419	0.954419	SEC23A/SNAP23/PSMD3/AP2S1/PSME4/SEC13/SEC24B/PSMB8/HLA-DPB1	9
BP	GO:0021700	developmental maturation	10/451	164/10468	0.170159	0.954419	0.954419	GDF11/CATSPER2/TBX6/PCSK4/AP3D1/SPTBN4/PLXNB1/HES1/VEGFA/FOXO3	10
BP	GO:0060562	epithelial tube morphogenesis	11/451	184/10468	0.170639	0.954419	0.954419	RNF207/MTHFR/TMED2/PKD1/TBX6/RHOB/ACVR1/HES1/SEC24B/VEGFA/MYC	11
BP	GO:0070585	protein localization to mitochondrion	8/451	125/10468	0.171101	0.954419	0.954419	TOMM20/TIMM8B/YWHAE/NPEPPS/TIMM44/SAE1/CHCHD4/IMMP2L	8
BP	GO:0007224	smoothened signaling pathway	6/451	87/10468	0.172011	0.954419	0.954419	GPR161/IFT46/CHSY1/HES1/TTC26/HIPK2	6
BP	GO:0015931	nucleobase-containing compound transport	12/451	205/10468	0.174462	0.954419	0.954419	SRRM1/SFPQ/TOMM20/NPIPA1/SMG1/NUP85/EPG5/ZFP36/POLDIP3/SEC13/SDAD1/XPO7	12
BP	GO:0051650	establishment of vesicle localization	12/451	205/10468	0.174462	0.954419	0.954419	TMED2/SEC23A/VPS18/SNAP23/AP3S2/GOSR1/AP3D1/PIP5K1C/SEC13/TRAK1/TBC1D23/SEC24B	12
BP	GO:0046649	lymphocyte activation	21/451	391/10468	0.175153	0.954419	0.954419	RPL22/ZNF683/IRF2BP2/ATM/UNG/TYRO3/EXOSC6/ATAD5/AP3D1/ZFP36L2/CEBPB/RUNX1/HES1/AGER/HLA-DPB1/MICB/TNFRSF21/MYB/ULBP2/GNRH1/EFNB1	21
BP	GO:0070665	positive regulation of leukocyte proliferation	5/451	69/10468	0.175755	0.954419	0.954419	ATAD5/HES1/AGER/HLA-DPB1/EFNB1	5
BP	GO:0009581	detection of external stimulus	4/451	51/10468	0.176154	0.954419	0.954419	PKD1/REEP6/RRH/GNAQ	4
BP	GO:0046173	polyol biosynthetic process	4/451	51/10468	0.176154	0.954419	0.954419	CYP2R1/SPR/PLCL1/PCBD2	4
BP	GO:0048593	camera-type eye morphogenesis	4/451	51/10468	0.176154	0.954419	0.954419	FJX1/GDF11/VEGFA/HIPK2	4
BP	GO:0098930	axonal transport	4/451	51/10468	0.176154	0.954419	0.954419	AP3S2/SPG7/AP3D1/TRAK1	4
BP	GO:0043620	regulation of DNA-templated transcription in response to stress	7/451	107/10468	0.178185	0.954419	0.954419	RPS6KA1/PSMD3/PSME4/CEBPB/PSMB8/VEGFA/CITED2	7
BP	GO:0072599	establishment of protein localization to endoplasmic reticulum	7/451	107/10468	0.178185	0.954419	0.954419	RPL22/RPL11/RPS27/SRP9/RPL41/RPS29/SRP14	7
BP	GO:0032943	mononuclear cell proliferation	9/451	146/10468	0.178433	0.954419	0.954419	ATM/ATAD5/CEBPB/HES1/AGER/HLA-DPB1/TNFRSF21/GNRH1/EFNB1	9
BP	GO:0072001	renal system development	9/451	146/10468	0.178433	0.954419	0.954419	ACAT1/GDF11/PKD1/NUP85/ODC1/TIPARP/HES1/VEGFA/MYC	9
BP	GO:0014909	smooth muscle cell migration	3/451	34/10468	0.179139	0.954419	0.954419	TPM1/AAMP/TRIB1	3
BP	GO:0035904	aorta development	3/451	34/10468	0.179139	0.954419	0.954419	LTBP1/HES1/SEC24B	3
BP	GO:0038202	TORC1 signaling	3/451	34/10468	0.179139	0.954419	0.954419	ATM/RPTOR/SEC13	3
BP	GO:0046638	positive regulation of alpha-beta T cell differentiation	3/451	34/10468	0.179139	0.954419	0.954419	AP3D1/RUNX1/MYB	3
BP	GO:0048844	artery morphogenesis	3/451	34/10468	0.179139	0.954419	0.954419	HES1/SEC24B/VEGFA	3
BP	GO:0051031	tRNA transport	3/451	34/10468	0.179139	0.954419	0.954419	TOMM20/NUP85/SEC13	3
BP	GO:0071385	cellular response to glucocorticoid stimulus	3/451	34/10468	0.179139	0.954419	0.954419	ZFP36/ZFP36L2/FOXO3	3
BP	GO:0008202	steroid metabolic process	11/451	186/10468	0.179229	0.954419	0.954419	HSD17B7/LBR/GGPS1/CYP17A1/CYP2R1/ACAT1/HSD17B6/SULT1A3/SULT1A4/SCAP/TIPARP	11
BP	GO:0006520	cellular amino acid metabolic process	14/451	247/10468	0.179649	0.954419	0.954419	MTHFR/AHCYL1/GLUL/PYCR2/ACAT1/YARS2/PSMD3/ODC1/PSME4/GAD1/PPA2/PSMB8/AIMP2/AHCYL2	14
BP	GO:0000578	embryonic axis specification	2/451	18/10468	0.180488	0.954419	0.954419	TMED2/TBX6	2
BP	GO:0002715	regulation of natural killer cell mediated immunity	2/451	18/10468	0.180488	0.954419	0.954419	MICB/ULBP2	2
BP	GO:0007063	regulation of sister chromatid cohesion	2/451	18/10468	0.180488	0.954419	0.954419	SFPQ/FEN1	2
BP	GO:0009264	deoxyribonucleotide catabolic process	2/451	18/10468	0.180488	0.954419	0.954419	UNG/NEIL1	2
BP	GO:0010464	regulation of mesenchymal cell proliferation	2/451	18/10468	0.180488	0.954419	0.954419	VEGFA/MYC	2
BP	GO:0032528	microvillus organization	2/451	18/10468	0.180488	0.954419	0.954419	RAP1GAP/TNIK	2
BP	GO:0032986	protein-DNA complex disassembly	2/451	18/10468	0.180488	0.954419	0.954419	SMARCC2/MYC	2
BP	GO:0033137	negative regulation of peptidyl-serine phosphorylation	2/451	18/10468	0.180488	0.954419	0.954419	PWP1/PPM1F	2
BP	GO:0034311	diol metabolic process	2/451	18/10468	0.180488	0.954419	0.954419	SPR/PCBD2	2
BP	GO:0090184	positive regulation of kidney development	2/451	18/10468	0.180488	0.954419	0.954419	VEGFA/MYC	2
BP	GO:0090312	positive regulation of protein deacetylation	2/451	18/10468	0.180488	0.954419	0.954419	C6orf89/VEGFA	2
BP	GO:1901890	positive regulation of cell junction assembly	2/451	18/10468	0.180488	0.954419	0.954419	PPM1F/VEGFA	2
BP	GO:1904645	response to amyloid-beta	2/451	18/10468	0.180488	0.954419	0.954419	AGER/FOXO3	2
BP	GO:1990776	response to angiotensin	2/451	18/10468	0.180488	0.954419	0.954419	AHCYL1/CDC6	2
BP	GO:2000637	positive regulation of gene silencing by miRNA	2/451	18/10468	0.180488	0.954419	0.954419	AJUBA/ZFP36	2
BP	GO:0002440	production of molecular mediator of immune response	8/451	127/10468	0.181662	0.954419	0.954419	ATM/UNG/GPRC5B/EXOSC6/ATAD5/MAPK14/PMS2/PMS2P1	8
BP	GO:0003158	endothelium development	5/451	70/10468	0.183092	0.954419	0.954419	GSTM3/RHOB/ACVR1/VEGFA/RAP2C	5
BP	GO:0035335	peptidyl-tyrosine dephosphorylation	5/451	70/10468	0.183092	0.954419	0.954419	PTPRF/DUSP23/DUSP13/PTPN21/SSH2	5
BP	GO:0061418	regulation of transcription from RNA polymerase II promoter in response to hypoxia	5/451	70/10468	0.183092	0.954419	0.954419	PSMD3/PSME4/PSMB8/VEGFA/CITED2	5
BP	GO:1902749	regulation of cell cycle G2/M phase transition	11/451	187/10468	0.1836	0.954419	0.954419	CLSPN/ORC1/DTL/ATM/YWHAE/ATAD5/PSMD3/CDC6/PSME4/PSMB8/PCM1	11
BP	GO:0019882	antigen processing and presentation	10/451	167/10468	0.183911	0.954419	0.954419	SEC23A/SNAP23/PSMD3/AP3D1/AP2S1/PSME4/SEC13/SEC24B/PSMB8/HLA-DPB1	10
BP	GO:0001738	morphogenesis of a polarized epithelium	7/451	108/10468	0.18402	0.954419	0.954419	GPC6/PSMD3/SMURF2/AP2S1/PSME4/SEC24B/PSMB8	7
BP	GO:0006521	regulation of cellular amino acid metabolic process	4/451	52/10468	0.184825	0.954419	0.954419	PSMD3/ODC1/PSME4/PSMB8	4
BP	GO:0000077	DNA damage checkpoint	8/451	128/10468	0.187047	0.954419	0.954419	CLSPN/PLK3/DTL/INTS7/ATM/ARID3A/CLOCK/MAPK14	8
BP	GO:0007507	heart development	18/451	332/10468	0.187217	0.954419	0.954419	RNF207/DHRS3/ATM/TMED2/TPM1/PKD1/TBX6/EPOR/DAND5/LTBP1/ACVR1/HES1/SEC24B/MAPK14/PRICKLE4/VEGFA/CITED2/ZFPM2	18
BP	GO:0006935	chemotaxis	16/451	291/10468	0.189621	0.954419	0.954419	NBL1/RAP1GAP/ARTN/UNC5B/ROBO3/NUP85/PIP5K1C/SPTBN4/PPM1F/PLXNB1/FGF18/AGER/MAPK14/VEGFA/DOK2/EFNB1	16
BP	GO:0001707	mesoderm formation	3/451	35/10468	0.190108	0.954419	0.954419	EXT2/TBX6/ACVR1	3
BP	GO:0006336	DNA replication-independent nucleosome assembly	3/451	35/10468	0.190108	0.954419	0.954419	OIP5/ASF1B/CENPC	3
BP	GO:0018198	peptidyl-cysteine modification	3/451	35/10468	0.190108	0.954419	0.954419	NOS1AP/CHCHD4/ZDHHC19	3
BP	GO:0030888	regulation of B cell proliferation	3/451	35/10468	0.190108	0.954419	0.954419	ATM/ATAD5/TNFRSF21	3
BP	GO:0043628	ncRNA 3'-end processing	3/451	35/10468	0.190108	0.954419	0.954419	INTS7/EXOSC6/EXOSC2	3
BP	GO:0045604	regulation of epidermal cell differentiation	3/451	35/10468	0.190108	0.954419	0.954419	ZFP36/RUNX1/HES1	3
BP	GO:0019935	cyclic-nucleotide-mediated signaling	5/451	71/10468	0.19054	0.954419	0.954419	PTGER3/GPR161/EIF4EBP2/PRKAR2A/GNAQ	5
BP	GO:0051983	regulation of chromosome segregation	6/451	90/10468	0.191463	0.954419	0.954419	SFPQ/MKI67/FEN1/ATM/CDT1/CDC6	6
BP	GO:0071826	ribonucleoprotein complex subunit organization	13/451	230/10468	0.193358	0.954419	0.954419	MRTO4/RPL11/AGO1/NSUN4/RPS27/EIF2D/ATM/SART3/SNRPG/USP39/SMN1/SMN2/GEMIN8	13
BP	GO:0000245	spliceosomal complex assembly	4/451	53/10468	0.193633	0.954419	0.954419	SNRPG/USP39/SMN1/SMN2	4
BP	GO:0009582	detection of abiotic stimulus	4/451	53/10468	0.193633	0.954419	0.954419	PKD1/REEP6/RRH/GNAQ	4
BP	GO:0030512	negative regulation of transforming growth factor beta receptor signaling pathway	4/451	53/10468	0.193633	0.954419	0.954419	BAMBI/SMURF2/DAND5/LTBP1	4
BP	GO:0042255	ribosome assembly	4/451	53/10468	0.193633	0.954419	0.954419	MRTO4/RPL11/NSUN4/RPS27	4
BP	GO:0097006	regulation of plasma lipoprotein particle levels	4/451	53/10468	0.193633	0.954419	0.954419	AP2S1/LRPAP1/MTTP/MYLIP	4
BP	GO:0035567	non-canonical Wnt signaling pathway	7/451	110/10468	0.195922	0.954419	0.954419	AGO1/GPC6/PSMD3/SMURF2/AP2S1/PSME4/PSMB8	7
BP	GO:0006085	acetyl-CoA biosynthetic process	2/451	19/10468	0.1963	0.954419	0.954419	MPC2/ACAT1	2
BP	GO:0008038	neuron recognition	2/451	19/10468	0.1963	0.954419	0.954419	ROBO3/TNFRSF21	2
BP	GO:0009219	pyrimidine deoxyribonucleotide metabolic process	2/451	19/10468	0.1963	0.954419	0.954419	UNG/NEIL1	2
BP	GO:0030150	protein import into mitochondrial matrix	2/451	19/10468	0.1963	0.954419	0.954419	TOMM20/TIMM44	2
BP	GO:0030857	negative regulation of epithelial cell differentiation	2/451	19/10468	0.1963	0.954419	0.954419	HES1/VEGFA	2
BP	GO:0030947	regulation of vascular endothelial growth factor receptor signaling pathway	2/451	19/10468	0.1963	0.954419	0.954419	FGF18/VEGFA	2
BP	GO:0035909	aorta morphogenesis	2/451	19/10468	0.1963	0.954419	0.954419	HES1/SEC24B	2
BP	GO:0044346	fibroblast apoptotic process	2/451	19/10468	0.1963	0.954419	0.954419	STK17A/MYC	2
BP	GO:0046386	deoxyribose phosphate catabolic process	2/451	19/10468	0.1963	0.954419	0.954419	UNG/NEIL1	2
BP	GO:0051383	kinetochore organization	2/451	19/10468	0.1963	0.954419	0.954419	CDT1/CENPC	2
BP	GO:0060042	retina morphogenesis in camera-type eye	2/451	19/10468	0.1963	0.954419	0.954419	FJX1/HIPK2	2
BP	GO:0060148	positive regulation of posttranscriptional gene silencing	2/451	19/10468	0.1963	0.954419	0.954419	AJUBA/ZFP36	2
BP	GO:0060330	regulation of response to interferon-gamma	2/451	19/10468	0.1963	0.954419	0.954419	CDC37/PARP14	2
BP	GO:0060334	regulation of interferon-gamma-mediated signaling pathway	2/451	19/10468	0.1963	0.954419	0.954419	CDC37/PARP14	2
BP	GO:0071459	protein localization to chromosome, centromeric region	2/451	19/10468	0.1963	0.954419	0.954419	CDT1/BOD1	2
BP	GO:0071542	dopaminergic neuron differentiation	2/451	19/10468	0.1963	0.954419	0.954419	EN1/VEGFA	2
BP	GO:0086004	regulation of cardiac muscle cell contraction	2/451	19/10468	0.1963	0.954419	0.954419	RNF207/NOS1AP	2
BP	GO:1901381	positive regulation of potassium ion transmembrane transport	2/451	19/10468	0.1963	0.954419	0.954419	RNF207/NOS1AP	2
BP	GO:1901798	positive regulation of signal transduction by p53 class mediator	2/451	19/10468	0.1963	0.954419	0.954419	RPL11/ATM	2
BP	GO:0042330	taxis	16/451	293/10468	0.196822	0.954419	0.954419	NBL1/RAP1GAP/ARTN/UNC5B/ROBO3/NUP85/PIP5K1C/SPTBN4/PPM1F/PLXNB1/FGF18/AGER/MAPK14/VEGFA/DOK2/EFNB1	16
BP	GO:0010632	regulation of epithelial cell migration	8/451	130/10468	0.198018	0.954419	0.954419	GLUL/RHOB/AAMP/PPM1F/CAPN7/HYAL1/FGF18/VEGFA	8
BP	GO:0031123	RNA 3'-end processing	8/451	130/10468	0.198018	0.954419	0.954419	SRRM1/AHCYL1/INTS7/ZC3H14/EXOSC6/SUPT5H/POLDIP3/EXOSC2	8
BP	GO:0033045	regulation of sister chromatid segregation	5/451	72/10468	0.198094	0.954419	0.954419	SFPQ/FEN1/ATM/CDT1/CDC6	5
BP	GO:0002181	cytoplasmic translation	6/451	91/10468	0.198128	0.954419	0.954419	RPL11/EIF2D/RPL41/RPS29/EEF2/CPEB4	6
BP	GO:0009108	coenzyme biosynthetic process	12/451	211/10468	0.199672	0.954419	0.954419	ACOT7/MPC2/HKDC1/ECD/ACAT1/ALDOC/NUP85/SPR/SEC13/COQ2/PCBD2/COQ4	12
BP	GO:0035239	tube morphogenesis	24/451	463/10468	0.199802	0.954419	0.954419	RNF207/MTHFR/AGO1/GLUL/UNC5B/TMED2/PKD1/TBX6/PAK4/RHOB/HS6ST1/ACVR1/AAMP/RUNX1/HYAL1/TIPARP/HES1/SEC24B/FGF18/MAPK14/VEGFA/HIPK2/ZFPM2/MYC	24
BP	GO:0001947	heart looping	3/451	36/10468	0.201242	0.954419	0.954419	RNF207/TMED2/TBX6	3
BP	GO:0034724	DNA replication-independent nucleosome organization	3/451	36/10468	0.201242	0.954419	0.954419	OIP5/ASF1B/CENPC	3
BP	GO:0045600	positive regulation of fat cell differentiation	3/451	36/10468	0.201242	0.954419	0.954419	ZFP36/CEBPB/MAPK14	3
BP	GO:0051646	mitochondrion localization	3/451	36/10468	0.201242	0.954419	0.954419	MSTO1/MARK2/TRAK1	3
BP	GO:0071384	cellular response to corticosteroid stimulus	3/451	36/10468	0.201242	0.954419	0.954419	ZFP36/ZFP36L2/FOXO3	3
BP	GO:0006695	cholesterol biosynthetic process	4/451	54/10468	0.202569	0.954419	0.954419	HSD17B7/LBR/GGPS1/SCAP	4
BP	GO:0006721	terpenoid metabolic process	4/451	54/10468	0.202569	0.954419	0.954419	DHRS3/GGPS1/GPC6/CYP2S1	4
BP	GO:1902653	secondary alcohol biosynthetic process	4/451	54/10468	0.202569	0.954419	0.954419	HSD17B7/LBR/GGPS1/SCAP	4
BP	GO:0071356	cellular response to tumor necrosis factor	10/451	171/10468	0.203004	0.954419	0.954419	CD58/PSMD3/ZFP36/ZFP36L2/PSME4/HYAL1/PSMB8/MAPK14/TNFRSF21/FOXO3	10
BP	GO:0043488	regulation of mRNA stability	9/451	151/10468	0.203781	0.954419	0.954419	ZC3H14/EXOSC6/PSMD3/ZFP36/ZFP36L2/PSME4/PSMB8/MAPK14/EXOSC2	9
BP	GO:0045765	regulation of angiogenesis	9/451	151/10468	0.203781	0.954419	0.954419	AGO1/GLUL/PAK4/RHOB/RUNX1/HYAL1/FGF18/VEGFA/HIPK2	9
BP	GO:0009416	response to light stimulus	12/451	212/10468	0.204027	0.954419	0.954419	DTL/FEN1/ERCC5/MEIS2/REEP6/DYNLRB1/HYAL1/CLOCK/RRH/MAPK13/MYC/GNAQ	12
BP	GO:0042737	drug catabolic process	5/451	73/10468	0.205749	0.954419	0.954419	NPL/CYP2R1/ACAT1/SULT1A3/CYP2S1	5
BP	GO:0043200	response to amino acid	5/451	73/10468	0.205749	0.954419	0.954419	MTHFR/TOMM20/RPTOR/CEBPB/CPEB4	5
BP	GO:0046434	organophosphate catabolic process	11/451	192/10468	0.206178	0.954419	0.954419	ACOT7/HKDC1/ECD/ACAT1/UNG/NEIL1/HDDC3/ALDOC/NUP85/SEC13/HINT1	11
BP	GO:0021915	neural tube development	7/451	112/10468	0.208121	0.954419	0.954419	MTHFR/GPR161/TMED2/PKD1/EN1/HES1/SEC24B	7
BP	GO:0006605	protein targeting	19/451	360/10468	0.21054	0.954419	0.954419	RPL22/RPL11/RPS27/SRP9/TOMM20/TIMM8B/RPL41/RPS29/SRP14/YWHAE/NPEPPS/AP3D1/TIMM44/CDC37/SAE1/CHCHD4/TRAK1/ZDHHC19/IMMP2L	19
BP	GO:0008652	cellular amino acid biosynthetic process	4/451	55/10468	0.211624	0.954419	0.954419	MTHFR/GLUL/PYCR2/GAD1	4
BP	GO:0001889	liver development	6/451	93/10468	0.211709	0.954419	0.954419	RPS6KA1/ACAT1/PKD1/CEBPB/HES1/CITED2	6
BP	GO:0022408	negative regulation of cell-cell adhesion	6/451	93/10468	0.211709	0.954419	0.954419	CEBPB/RUNX1/PPM1F/VEGFA/TNFRSF21/GNRH1	6
BP	GO:0008299	isoprenoid biosynthetic process	2/451	20/10468	0.212273	0.954419	0.954419	GGPS1/COQ2	2
BP	GO:0010499	proteasomal ubiquitin-independent protein catabolic process	2/451	20/10468	0.212273	0.954419	0.954419	PSME4/PSMB8	2
BP	GO:0019369	arachidonic acid metabolic process	2/451	20/10468	0.212273	0.954419	0.954419	CYP2S1/TBXAS1	2
BP	GO:0035315	hair cell differentiation	2/451	20/10468	0.212273	0.954419	0.954419	HES1/SEC24B	2
BP	GO:0035774	positive regulation of insulin secretion involved in cellular response to glucose stimulus	2/451	20/10468	0.212273	0.954419	0.954419	MPC2/C2CD2L	2
BP	GO:0042036	negative regulation of cytokine biosynthetic process	2/451	20/10468	0.212273	0.954419	0.954419	ZFP36/TRIB2	2
BP	GO:0046827	positive regulation of protein export from nucleus	2/451	20/10468	0.212273	0.954419	0.954419	YWHAE/RBM22	2
BP	GO:0050869	negative regulation of B cell activation	2/451	20/10468	0.212273	0.954419	0.954419	ATM/TNFRSF21	2
BP	GO:0060428	lung epithelium development	2/451	20/10468	0.212273	0.954419	0.954419	PKD1/AIMP2	2
BP	GO:1904037	positive regulation of epithelial cell apoptotic process	2/451	20/10468	0.212273	0.954419	0.954419	SORT1/FOXO3	2
BP	GO:0007189	adenylate cyclase-activating G protein-coupled receptor signaling pathway	3/451	37/10468	0.212525	0.954419	0.954419	PTGER3/GPR161/GNAQ	3
BP	GO:0009066	aspartate family amino acid metabolic process	3/451	37/10468	0.212525	0.954419	0.954419	MTHFR/AHCYL1/AHCYL2	3
BP	GO:0048332	mesoderm morphogenesis	3/451	37/10468	0.212525	0.954419	0.954419	EXT2/TBX6/ACVR1	3
BP	GO:0051187	cofactor catabolic process	3/451	37/10468	0.212525	0.954419	0.954419	ACOT7/ACAT1/BLVRB	3
BP	GO:0051648	vesicle localization	12/451	214/10468	0.21286	0.954419	0.954419	TMED2/SEC23A/VPS18/SNAP23/AP3S2/GOSR1/AP3D1/PIP5K1C/SEC13/TRAK1/TBC1D23/SEC24B	12
BP	GO:0051656	establishment of organelle localization	20/451	382/10468	0.213117	0.954419	0.954419	ATM/TMED2/SEC23A/VPS18/NUSAP1/SNAP23/AP3S2/CDT1/LLGL1/GOSR1/AP3D1/PIP5K1C/SEC13/TRAK1/TBC1D23/CENPC/SDAD1/SEC24B/BOD1/PCM1	20
BP	GO:0002495	antigen processing and presentation of peptide antigen via MHC class II	5/451	74/10468	0.2135	0.954419	0.954419	SEC23A/AP2S1/SEC13/SEC24B/HLA-DPB1	5
BP	GO:0006353	DNA-templated transcription, termination	5/451	74/10468	0.2135	0.954419	0.954419	TTF2/SNRPG/SMN1/SMN2/POLR1E	5
BP	GO:0019886	antigen processing and presentation of exogenous peptide antigen via MHC class II	5/451	74/10468	0.2135	0.954419	0.954419	SEC23A/AP2S1/SEC13/SEC24B/HLA-DPB1	5
BP	GO:0031497	chromatin assembly	5/451	74/10468	0.2135	0.954419	0.954419	SART3/OIP5/ASF1B/CENPC/SHPRH	5
BP	GO:0050864	regulation of B cell activation	5/451	74/10468	0.2135	0.954419	0.954419	ATM/EXOSC6/ATAD5/ZFP36L2/TNFRSF21	5
BP	GO:0065004	protein-DNA complex assembly	9/451	153/10468	0.214317	0.954419	0.954419	SART3/ERCC5/RAD51/OIP5/CDT1/ASF1B/CENPC/SHPRH/POLR1E	9
BP	GO:0000075	cell cycle checkpoint	11/451	194/10468	0.21553	0.954419	0.954419	CLSPN/PLK3/ORC1/DTL/INTS7/ATM/CDT1/CDC6/ARID3A/CLOCK/MAPK14	11
BP	GO:0048609	multicellular organismal reproductive process	24/451	469/10468	0.217659	0.954419	0.954419	TESK2/UBE2Q1/ARID4B/DUSP13/ATM/TMED2/HERC2/TYRO3/CATSPER2/SNRPA1/SPATA20/PCSK4/EPOR/ASF1B/SPDYA/PSME4/ACVR1/CLOCK/FOXO3/IMMP2L/TTC26/GNRH1/SPATA31C1/NR6A1	24
BP	GO:0010389	regulation of G2/M transition of mitotic cell cycle	10/451	174/10468	0.217853	0.954419	0.954419	CLSPN/ORC1/DTL/ATM/YWHAE/PSMD3/CDC6/PSME4/PSMB8/PCM1	10
BP	GO:0044774	mitotic DNA integrity checkpoint	6/451	94/10468	0.218619	0.954419	0.954419	CLSPN/PLK3/ORC1/ATM/CDC6/ARID3A	6
BP	GO:0050796	regulation of insulin secretion	6/451	94/10468	0.218619	0.954419	0.954419	ENSA/MPC2/GLUL/C2CD2L/MIDN/CLOCK	6
BP	GO:0051251	positive regulation of lymphocyte activation	9/451	154/10468	0.219665	0.954419	0.954419	EXOSC6/ATAD5/AP3D1/RUNX1/HES1/AGER/HLA-DPB1/MYB/EFNB1	9
BP	GO:0070661	leukocyte proliferation	9/451	154/10468	0.219665	0.954419	0.954419	ATM/ATAD5/CEBPB/HES1/AGER/HLA-DPB1/TNFRSF21/GNRH1/EFNB1	9
BP	GO:0071560	cellular response to transforming growth factor beta stimulus	9/451	154/10468	0.219665	0.954419	0.954419	BAMBI/SMURF2/DAND5/LTBP1/ZFP36L2/ACVR1/DLX1/CITED2/HIPK2	9
BP	GO:0140053	mitochondrial gene expression	9/451	154/10468	0.219665	0.954419	0.954419	NSUN4/DAP3/MRPL49/YARS2/MRPL38/TRMT10A/FOXO3/MRPS33/TRUB2	9
BP	GO:0017148	negative regulation of translation	7/451	114/10468	0.220597	0.954419	0.954419	AGO1/SRP9/EIF4EBP2/ZFP36/ZFP36L2/CPEB4/RNF139	7
BP	GO:0050870	positive regulation of T cell activation	7/451	114/10468	0.220597	0.954419	0.954419	AP3D1/RUNX1/HES1/AGER/HLA-DPB1/MYB/EFNB1	7
BP	GO:0022409	positive regulation of cell-cell adhesion	8/451	134/10468	0.220715	0.954419	0.954419	AP3D1/RUNX1/HES1/AGER/HLA-DPB1/MYB/CITED2/EFNB1	8
BP	GO:0007045	cell-substrate adherens junction assembly	4/451	56/10468	0.220791	0.954419	0.954419	TESK2/AJUBA/PPM1F/VEGFA	4
BP	GO:0048041	focal adhesion assembly	4/451	56/10468	0.220791	0.954419	0.954419	TESK2/AJUBA/PPM1F/VEGFA	4
BP	GO:0002504	antigen processing and presentation of peptide or polysaccharide antigen via MHC class II	5/451	75/10468	0.221343	0.954419	0.954419	SEC23A/AP2S1/SEC13/SEC24B/HLA-DPB1	5
BP	GO:0046330	positive regulation of JNK cascade	5/451	75/10468	0.221343	0.954419	0.954419	MAP4K5/TNIK/AGER/HIPK2/GADD45G	5
BP	GO:0045860	positive regulation of protein kinase activity	18/451	342/10468	0.221765	0.954419	0.954419	CLSPN/MARK2/CCND2/AJUBA/MAP4K5/PKD1/GPRC5B/CDC6/RPTOR/PAK4/SPDYA/PRKAR2A/TNIK/FGF18/AGER/MAPK14/VEGFA/GADD45G	18
BP	GO:0051961	negative regulation of nervous system development	10/451	175/10468	0.222898	0.954419	0.954419	GPR161/GDF11/TBX6/DLX1/HES1/MYLIP/TNFRSF21/FOXO3/PCM1/GNRH1	10
BP	GO:0008380	RNA splicing	20/451	385/10468	0.2232	0.954419	0.954419	SRRM1/SFPQ/PRPF38A/TTF2/IVNS1ABP/ECD/ZC3H10/SART3/SNRPA1/NSRP1/SF3B6/SNRNP27/PCBP1/SNRPG/USP39/SMN1/SMN2/RBM22/PRKRIP1/GEMIN8	20
BP	GO:1905114	cell surface receptor signaling pathway involved in cell-cell signaling	20/451	385/10468	0.2232	0.954419	0.954419	AGO1/BAMBI/GRK5/MARK2/GPC6/TYRO3/PKD1/GPRC5B/BRD7/PSMD3/SMURF2/AP2S1/PSME4/USP34/RUNX1/TNIK/PSMB8/MAPK14/FOXO3/GNAQ	20
BP	GO:0032504	multicellular organism reproduction	24/451	471/10468	0.223775	0.954419	0.954419	TESK2/UBE2Q1/ARID4B/DUSP13/ATM/TMED2/HERC2/TYRO3/CATSPER2/SNRPA1/SPATA20/PCSK4/EPOR/ASF1B/SPDYA/PSME4/ACVR1/CLOCK/FOXO3/IMMP2L/TTC26/GNRH1/SPATA31C1/NR6A1	24
BP	GO:0002381	immunoglobulin production involved in immunoglobulin mediated immune response	3/451	38/10468	0.22394	0.954419	0.954419	UNG/EXOSC6/ATAD5	3
BP	GO:0016447	somatic recombination of immunoglobulin gene segments	3/451	38/10468	0.22394	0.954419	0.954419	UNG/EXOSC6/ATAD5	3
BP	GO:0030834	regulation of actin filament depolymerization	3/451	38/10468	0.22394	0.954419	0.954419	LMOD1/SPTBN4/CAPG	3
BP	GO:0034381	plasma lipoprotein particle clearance	3/451	38/10468	0.22394	0.954419	0.954419	AP2S1/LRPAP1/MYLIP	3
BP	GO:0042698	ovulation cycle	3/451	38/10468	0.22394	0.954419	0.954419	TYRO3/FOXO3/GNRH1	3
BP	GO:0043486	histone exchange	3/451	38/10468	0.22394	0.954419	0.954419	OIP5/PSME4/CENPC	3
BP	GO:0047496	vesicle transport along microtubule	3/451	38/10468	0.22394	0.954419	0.954419	AP3S2/AP3D1/TRAK1	3
BP	GO:2000243	positive regulation of reproductive process	3/451	38/10468	0.22394	0.954419	0.954419	SMURF2/CITED2/ZFPM2	3
BP	GO:0030705	cytoskeleton-dependent intracellular transport	9/451	155/10468	0.225065	0.954419	0.954419	SFPQ/IFT46/AP3S2/SPG7/AP3D1/DYNLRB1/TRAK1/TTC26/PCM1	9
BP	GO:2000145	regulation of cell motility	25/451	493/10468	0.225083	0.954419	0.954419	NBL1/GLUL/ATM/AJUBA/TPM1/SMURF2/RHOB/ACVR1/AAMP/PPM1F/CAPN7/ELP6/PLXNB1/HYAL1/IGSF10/FGF18/AGER/MAPK14/VEGFA/FOXO3/CITED2/GNRH1/TRIB1/SCAI/RAP2C	25
BP	GO:0061008	hepaticobiliary system development	6/451	95/10468	0.225604	0.954419	0.954419	RPS6KA1/ACAT1/PKD1/CEBPB/HES1/CITED2	6
BP	GO:0051028	mRNA transport	8/451	135/10468	0.226536	0.954419	0.954419	SRRM1/NPIPA1/SMG1/NUP85/ZFP36/POLDIP3/SEC13/XPO7	8
BP	GO:0010948	negative regulation of cell cycle process	15/451	280/10468	0.227298	0.954419	0.954419	CLSPN/PLK3/ORC1/DTL/ATM/RAD51/NUBP1/BRD7/CDT1/PSMD3/CDC6/ARID3A/ZFP36L2/PSME4/PSMB8	15
BP	GO:0001774	microglial cell activation	2/451	21/10468	0.228365	0.954419	0.954419	ATM/AGER	2
BP	GO:0001893	maternal placenta development	2/451	21/10468	0.228365	0.954419	0.954419	TMED2/EPOR	2
BP	GO:0002063	chondrocyte development	2/451	21/10468	0.228365	0.954419	0.954419	CHSY1/FGF18	2
BP	GO:0002269	leukocyte activation involved in inflammatory response	2/451	21/10468	0.228365	0.954419	0.954419	ATM/AGER	2
BP	GO:0006536	glutamate metabolic process	2/451	21/10468	0.228365	0.954419	0.954419	GLUL/GAD1	2
BP	GO:0006692	prostanoid metabolic process	2/451	21/10468	0.228365	0.954419	0.954419	CYP2S1/TBXAS1	2
BP	GO:0006693	prostaglandin metabolic process	2/451	21/10468	0.228365	0.954419	0.954419	CYP2S1/TBXAS1	2
BP	GO:0007602	phototransduction	2/451	21/10468	0.228365	0.954419	0.954419	RRH/GNAQ	2
BP	GO:0010463	mesenchymal cell proliferation	2/451	21/10468	0.228365	0.954419	0.954419	VEGFA/MYC	2
BP	GO:0032735	positive regulation of interleukin-12 production	2/451	21/10468	0.228365	0.954419	0.954419	AGER/MAPK14	2
BP	GO:0035066	positive regulation of histone acetylation	2/451	21/10468	0.228365	0.954419	0.954419	BRD7/KAT7	2
BP	GO:0045933	positive regulation of muscle contraction	2/451	21/10468	0.228365	0.954419	0.954419	RNF207/NOS1AP	2
BP	GO:0048662	negative regulation of smooth muscle cell proliferation	2/451	21/10468	0.228365	0.954419	0.954419	TPM1/TRIB1	2
BP	GO:0055023	positive regulation of cardiac muscle tissue growth	2/451	21/10468	0.228365	0.954419	0.954419	MAPK14/ZFPM2	2
BP	GO:0086002	cardiac muscle cell action potential involved in contraction	2/451	21/10468	0.228365	0.954419	0.954419	RNF207/NOS1AP	2
BP	GO:1903393	positive regulation of adherens junction organization	2/451	21/10468	0.228365	0.954419	0.954419	PPM1F/VEGFA	2
BP	GO:1905517	macrophage migration	2/451	21/10468	0.228365	0.954419	0.954419	NUP85/MAPK14	2
BP	GO:2001222	regulation of neuron migration	2/451	21/10468	0.228365	0.954419	0.954419	IGSF10/GNRH1	2
BP	GO:0001508	action potential	4/451	57/10468	0.23006	0.954419	0.954419	RNF207/NOS1AP/YWHAE/GNAQ	4
BP	GO:0002065	columnar/cuboidal epithelial cell differentiation	4/451	57/10468	0.23006	0.954419	0.954419	CEBPB/HES1/CLOCK/SEC24B	4
BP	GO:0043487	regulation of RNA stability	9/451	156/10468	0.230514	0.954419	0.954419	ZC3H14/EXOSC6/PSMD3/ZFP36/ZFP36L2/PSME4/PSMB8/MAPK14/EXOSC2	9
BP	GO:0070646	protein modification by small protein removal	13/451	239/10468	0.231537	0.954419	0.954419	CLSPN/TOMM20/DESI2/SART3/PSMD3/ATXN7L3/SMURF2/PSME4/USP34/USP39/ATXN7/PSMB8/MYC	13
BP	GO:0071363	cellular response to growth factor stimulus	21/451	409/10468	0.231932	0.954419	0.954419	NBL1/SORT1/BAMBI/ARPC3/SMURF2/EEF2/DAND5/ZFP36/LTBP1/ZFP36L2/ACVR1/DLX1/HYAL1/HES1/FGF18/MAPK14/FRS3/VEGFA/FOXO3/CITED2/HIPK2	21
BP	GO:0002695	negative regulation of leukocyte activation	6/451	96/10468	0.232661	0.954419	0.954419	ATM/TYRO3/CEBPB/RUNX1/TNFRSF21/GNRH1	6
BP	GO:0030218	erythrocyte differentiation	6/451	96/10468	0.232661	0.954419	0.954419	ZFP36/HSPA9/MAPK14/VEGFA/FOXO3/HIPK2	6
BP	GO:0050867	positive regulation of cell activation	10/451	177/10468	0.233124	0.954419	0.954419	RPS6KA1/EXOSC6/ATAD5/AP3D1/RUNX1/HES1/AGER/HLA-DPB1/MYB/EFNB1	10
BP	GO:0030837	negative regulation of actin filament polymerization	3/451	39/10468	0.235471	0.954419	0.954419	LMOD1/SPTBN4/CAPG	3
BP	GO:0044743	protein transmembrane import into intracellular organelle	3/451	39/10468	0.235471	0.954419	0.954419	TOMM20/TIMM44/CHCHD4	3
BP	GO:0045685	regulation of glial cell differentiation	3/451	39/10468	0.235471	0.954419	0.954419	DLX1/HES1/TNFRSF21	3
BP	GO:1901379	regulation of potassium ion transmembrane transport	3/451	39/10468	0.235471	0.954419	0.954419	RNF207/NOS1AP/YWHAE	3
BP	GO:2000514	regulation of CD4-positive, alpha-beta T cell activation	3/451	39/10468	0.235471	0.954419	0.954419	RUNX1/AGER/MYB	3
BP	GO:0032147	activation of protein kinase activity	12/451	219/10468	0.235632	0.954419	0.954419	CLSPN/MARK2/MAP4K5/GPRC5B/RPTOR/PAK4/SPDYA/PRKAR2A/TNIK/MAPK14/VEGFA/GADD45G	12
BP	GO:0097193	intrinsic apoptotic signaling pathway	12/451	219/10468	0.235632	0.954419	0.954419	RPL11/IFI6/SFPQ/MCL1/IVNS1ABP/CUL5/ATM/ATAD5/CEBPB/PPM1F/HINT1/HIPK2	12
BP	GO:0046879	hormone secretion	9/451	157/10468	0.236012	0.954419	0.954419	ENSA/UBE2Q1/MPC2/GLUL/C2CD2L/SNAP23/MIDN/CLOCK/MYB	9
BP	GO:0071559	response to transforming growth factor beta	9/451	157/10468	0.236012	0.954419	0.954419	BAMBI/SMURF2/DAND5/LTBP1/ZFP36L2/ACVR1/DLX1/CITED2/HIPK2	9
BP	GO:0046718	viral entry into host cell	5/451	77/10468	0.237283	0.954419	0.954419	VPS18/TYRO3/HYAL1/ZNF639/GYPA	5
BP	GO:0007610	behavior	16/451	304/10468	0.238641	0.954419	0.954419	UBE2Q1/EIF4EBP2/FEN1/ZFHX2/MEIS2/APRT/OLFM2/SPTBN4/EN1/GAD1/DYNLRB1/CEBPB/AGER/HIPK2/PCM1/VDAC3	16
BP	GO:0006805	xenobiotic metabolic process	4/451	58/10468	0.239425	0.954419	0.954419	GSTM3/CYP2R1/SULT1A3/CYP2S1	4
BP	GO:0016126	sterol biosynthetic process	4/451	58/10468	0.239425	0.954419	0.954419	HSD17B7/LBR/GGPS1/SCAP	4
BP	GO:0048207	vesicle targeting, rough ER to cis-Golgi	4/451	58/10468	0.239425	0.954419	0.954419	TMED2/SEC23A/SEC13/SEC24B	4
BP	GO:0048208	COPII vesicle coating	4/451	58/10468	0.239425	0.954419	0.954419	TMED2/SEC23A/SEC13/SEC24B	4
BP	GO:0071806	protein transmembrane transport	4/451	58/10468	0.239425	0.954419	0.954419	MCL1/TOMM20/TIMM44/CHCHD4	4
BP	GO:0001101	response to acid chemical	11/451	199/10468	0.23965	0.954419	0.954419	MTHFR/TOMM20/ATM/RPTOR/EEF2/CEBPB/CPEB4/MICB/VEGFA/MYB/GNRH1	11
BP	GO:0006333	chromatin assembly or disassembly	6/451	97/10468	0.239787	0.954419	0.954419	SMARCC2/SART3/OIP5/ASF1B/CENPC/SHPRH	6
BP	GO:0032872	regulation of stress-activated MAPK cascade	8/451	138/10468	0.244323	0.954419	0.954419	MAP4K5/TNIK/AGER/VEGFA/KLHDC10/HIPK2/MYC/GADD45G	8
BP	GO:1901215	negative regulation of neuron death	8/451	138/10468	0.244323	0.954419	0.954419	UNC5B/TYRO3/SULT1A3/EN1/DLX1/CEBPB/CPEB4/HIPK2	8
BP	GO:0001569	branching involved in blood vessel morphogenesis	2/451	22/10468	0.244535	0.954419	0.954419	ACVR1/VEGFA	2
BP	GO:0008334	histone mRNA metabolic process	2/451	22/10468	0.244535	0.954419	0.954419	ATM/SNRPG	2
BP	GO:0021879	forebrain neuron differentiation	2/451	22/10468	0.244535	0.954419	0.954419	DLX1/HES1	2
BP	GO:0030511	positive regulation of transforming growth factor beta receptor signaling pathway	2/451	22/10468	0.244535	0.954419	0.954419	CITED2/HIPK2	2
BP	GO:0031063	regulation of histone deacetylation	2/451	22/10468	0.244535	0.954419	0.954419	C6orf89/VEGFA	2
BP	GO:0038128	ERBB2 signaling pathway	2/451	22/10468	0.244535	0.954419	0.954419	CUL5/CDC37	2
BP	GO:0043268	positive regulation of potassium ion transport	2/451	22/10468	0.244535	0.954419	0.954419	RNF207/NOS1AP	2
BP	GO:0048806	genitalia development	2/451	22/10468	0.244535	0.954419	0.954419	TYRO3/PKD1	2
BP	GO:0060119	inner ear receptor cell development	2/451	22/10468	0.244535	0.954419	0.954419	HES1/SEC24B	2
BP	GO:0060251	regulation of glial cell proliferation	2/451	22/10468	0.244535	0.954419	0.954419	HES1/MYB	2
BP	GO:0070169	positive regulation of biomineral tissue development	2/451	22/10468	0.244535	0.954419	0.954419	ACVR1/CEBPB	2
BP	GO:0071218	cellular response to misfolded protein	2/451	22/10468	0.244535	0.954419	0.954419	UGGT1/SDF2L1	2
BP	GO:0090183	regulation of kidney development	2/451	22/10468	0.244535	0.954419	0.954419	VEGFA/MYC	2
BP	GO:0097028	dendritic cell differentiation	2/451	22/10468	0.244535	0.954419	0.954419	CEBPB/AGER	2
BP	GO:1902175	regulation of oxidative stress-induced intrinsic apoptotic signaling pathway	2/451	22/10468	0.244535	0.954419	0.954419	SFPQ/MCL1	2
BP	GO:1902253	regulation of intrinsic apoptotic signaling pathway by p53 class mediator	2/451	22/10468	0.244535	0.954419	0.954419	RPL11/ATAD5	2
BP	GO:1903115	regulation of actin filament-based movement	2/451	22/10468	0.244535	0.954419	0.954419	RNF207/NOS1AP	2
BP	GO:1903846	positive regulation of cellular response to transforming growth factor beta stimulus	2/451	22/10468	0.244535	0.954419	0.954419	CITED2/HIPK2	2
BP	GO:2000758	positive regulation of peptidyl-lysine acetylation	2/451	22/10468	0.244535	0.954419	0.954419	BRD7/KAT7	2
BP	GO:0043009	chordate embryonic development	22/451	435/10468	0.2469	0.954419	0.954419	MTHFR/HSD17B7/GPR161/NPAT/ATM/TMED2/TPM1/PKD1/TBX6/BPTF/ASF1B/SF3B6/EN1/HS6ST1/ACVR1/DLX1/CEBPB/HYAL1/HES1/SEC24B/VEGFA/ZFPM2	22
BP	GO:0000959	mitochondrial RNA metabolic process	3/451	40/10468	0.247104	0.954419	0.954419	YARS2/TRMT10A/FOXO3	3
BP	GO:0001885	endothelial cell development	3/451	40/10468	0.247104	0.954419	0.954419	GSTM3/VEGFA/RAP2C	3
BP	GO:0006284	base-excision repair	3/451	40/10468	0.247104	0.954419	0.954419	FEN1/UNG/NEIL1	3
BP	GO:0007059	chromosome segregation	14/451	264/10468	0.248749	0.954419	0.954419	SFPQ/MSTO1/MKI67/FEN1/ATM/OIP5/NUSAP1/CDT1/CDC6/TOP3B/STAG1/CENPC/BOD1/STAG3L2	14
BP	GO:0042110	T cell activation	14/451	264/10468	0.248749	0.954419	0.954419	RPL22/ZNF683/AP3D1/ZFP36L2/CEBPB/RUNX1/HES1/AGER/HLA-DPB1/MICB/TNFRSF21/MYB/GNRH1/EFNB1	14
BP	GO:0007159	leukocyte cell-cell adhesion	10/451	180/10468	0.248784	0.954419	0.954419	AP3D1/CEBPB/RUNX1/HES1/AGER/HLA-DPB1/TNFRSF21/MYB/GNRH1/EFNB1	10
BP	GO:0002702	positive regulation of production of molecular mediator of immune response	4/451	59/10468	0.248876	0.954419	0.954419	GPRC5B/EXOSC6/ATAD5/MAPK14	4
BP	GO:0010595	positive regulation of endothelial cell migration	4/451	59/10468	0.248876	0.954419	0.954419	RHOB/AAMP/FGF18/VEGFA	4
BP	GO:0019933	cAMP-mediated signaling	4/451	59/10468	0.248876	0.954419	0.954419	PTGER3/GPR161/EIF4EBP2/GNAQ	4
BP	GO:0042035	regulation of cytokine biosynthetic process	4/451	59/10468	0.248876	0.954419	0.954419	ZFP36/TRIB2/CEBPB/AGER	4
BP	GO:0046128	purine ribonucleoside metabolic process	4/451	59/10468	0.248876	0.954419	0.954419	AHCYL1/HDDC3/APRT/AHCYL2	4
BP	GO:0050868	negative regulation of T cell activation	4/451	59/10468	0.248876	0.954419	0.954419	CEBPB/RUNX1/TNFRSF21/GNRH1	4
BP	GO:0000377	RNA splicing, via transesterification reactions with bulged adenosine as nucleophile	16/451	307/10468	0.250644	0.954419	0.954419	SRRM1/SFPQ/PRPF38A/ZC3H10/SART3/SNRPA1/NSRP1/SF3B6/SNRNP27/PCBP1/SNRPG/USP39/SMN1/SMN2/RBM22/GEMIN8	16
BP	GO:0000398	mRNA splicing, via spliceosome	16/451	307/10468	0.250644	0.954419	0.954419	SRRM1/SFPQ/PRPF38A/ZC3H10/SART3/SNRPA1/NSRP1/SF3B6/SNRNP27/PCBP1/SNRPG/USP39/SMN1/SMN2/RBM22/GEMIN8	16
BP	GO:0002521	leukocyte differentiation	16/451	307/10468	0.250644	0.954419	0.954419	RPL22/ZNF683/LBR/IRF2BP2/ATM/TYRO3/AP3D1/ZFP36L2/CEBPB/RUNX1/AGER/MAPK14/VEGFA/MYB/TRIB1/MYC	16
BP	GO:0007276	gamete generation	20/451	393/10468	0.251099	0.954419	0.954419	TESK2/ARID4B/DUSP13/ATM/HERC2/TYRO3/CATSPER2/SNRPA1/SPATA20/PCSK4/ASF1B/SPDYA/PSME4/ACVR1/CLOCK/FOXO3/IMMP2L/TTC26/SPATA31C1/NR6A1	20
BP	GO:0009914	hormone transport	9/451	160/10468	0.25278	0.954419	0.954419	ENSA/UBE2Q1/MPC2/GLUL/C2CD2L/SNAP23/MIDN/CLOCK/MYB	9
BP	GO:0008033	tRNA processing	7/451	119/10468	0.252872	0.954419	0.954419	ELP6/TRMT10A/THG1L/RPP21/CDKAL1/POP7/METTL2B	7
BP	GO:1903039	positive regulation of leukocyte cell-cell adhesion	7/451	119/10468	0.252872	0.954419	0.954419	AP3D1/RUNX1/HES1/AGER/HLA-DPB1/MYB/EFNB1	7
BP	GO:0006400	tRNA modification	5/451	79/10468	0.253527	0.954419	0.954419	ELP6/TRMT10A/THG1L/CDKAL1/METTL2B	5
BP	GO:0060968	regulation of gene silencing	6/451	99/10468	0.254228	0.954419	0.954419	AGO1/ZC3H10/AJUBA/NUP85/ZFP36/SEC13	6
BP	GO:0070302	regulation of stress-activated protein kinase signaling cascade	8/451	140/10468	0.256431	0.954419	0.954419	MAP4K5/TNIK/AGER/VEGFA/KLHDC10/HIPK2/MYC/GADD45G	8
BP	GO:0002479	antigen processing and presentation of exogenous peptide antigen via MHC class I, TAP-dependent	4/451	60/10468	0.258406	0.954419	0.954419	SNAP23/PSMD3/PSME4/PSMB8	4
BP	GO:0002708	positive regulation of lymphocyte mediated immunity	4/451	60/10468	0.258406	0.954419	0.954419	EXOSC6/ATAD5/MICB/ULBP2	4
BP	GO:0043154	negative regulation of cysteine-type endopeptidase activity involved in apoptotic process	4/451	60/10468	0.258406	0.954419	0.954419	RPS6KA1/IFI6/YWHAE/VEGFA	4
BP	GO:0072332	intrinsic apoptotic signaling pathway by p53 class mediator	4/451	60/10468	0.258406	0.954419	0.954419	RPL11/ATAD5/HINT1/HIPK2	4
BP	GO:1903312	negative regulation of mRNA metabolic process	4/451	60/10468	0.258406	0.954419	0.954419	ZC3H14/ZFP36/SUPT5H/MAPK14	4
BP	GO:0006260	DNA replication	13/451	245/10468	0.258556	0.954419	0.954419	CLSPN/ORC1/DTL/FEN1/ATM/CDK2AP1/RAD51/CDT1/ATAD5/CDC6/KAT7/PRIM2/RECQL4	13
BP	GO:0006378	mRNA polyadenylation	3/451	41/10468	0.258824	0.954419	0.954419	AHCYL1/ZC3H14/SUPT5H	3
BP	GO:0009798	axis specification	3/451	41/10468	0.258824	0.954419	0.954419	TMED2/TBX6/CITED2	3
BP	GO:0030042	actin filament depolymerization	3/451	41/10468	0.258824	0.954419	0.954419	LMOD1/SPTBN4/CAPG	3
BP	GO:0032024	positive regulation of insulin secretion	3/451	41/10468	0.258824	0.954419	0.954419	MPC2/GLUL/C2CD2L	3
BP	GO:0043631	RNA polyadenylation	3/451	41/10468	0.258824	0.954419	0.954419	AHCYL1/ZC3H14/SUPT5H	3
BP	GO:0046635	positive regulation of alpha-beta T cell activation	3/451	41/10468	0.258824	0.954419	0.954419	AP3D1/RUNX1/MYB	3
BP	GO:0006694	steroid biosynthetic process	7/451	120/10468	0.259493	0.954419	0.954419	HSD17B7/LBR/GGPS1/CYP17A1/CYP2R1/HSD17B6/SCAP	7
BP	GO:0006417	regulation of translation	15/451	288/10468	0.260426	0.954419	0.954419	RPL22/RPS6KA1/AGO1/NSUN4/SRP9/DNAJC1/EIF4EBP2/EEF2/ZFP36/ZFP36L2/POLDIP3/CPEB4/FOXO3/RNF139/TRUB2	15
BP	GO:0002067	glandular epithelial cell differentiation	2/451	23/10468	0.260747	0.954419	0.954419	HES1/CLOCK	2
BP	GO:0006471	protein ADP-ribosylation	2/451	23/10468	0.260747	0.954419	0.954419	PARP14/TIPARP	2
BP	GO:0030224	monocyte differentiation	2/451	23/10468	0.260747	0.954419	0.954419	VEGFA/MYC	2
BP	GO:0031018	endocrine pancreas development	2/451	23/10468	0.260747	0.954419	0.954419	HES1/CLOCK	2
BP	GO:0034122	negative regulation of toll-like receptor signaling pathway	2/451	23/10468	0.260747	0.954419	0.954419	TYRO3/LRRC14	2
BP	GO:0045191	regulation of isotype switching	2/451	23/10468	0.260747	0.954419	0.954419	EXOSC6/ATAD5	2
BP	GO:0045616	regulation of keratinocyte differentiation	2/451	23/10468	0.260747	0.954419	0.954419	ZFP36/RUNX1	2
BP	GO:0051788	response to misfolded protein	2/451	23/10468	0.260747	0.954419	0.954419	UGGT1/SDF2L1	2
BP	GO:0060421	positive regulation of heart growth	2/451	23/10468	0.260747	0.954419	0.954419	MAPK14/ZFPM2	2
BP	GO:0071634	regulation of transforming growth factor beta production	2/451	23/10468	0.260747	0.954419	0.954419	LTBP1/MYB	2
BP	GO:0090162	establishment of epithelial cell polarity	2/451	23/10468	0.260747	0.954419	0.954419	SIPA1L3/HES1	2
BP	GO:1903131	mononuclear cell differentiation	2/451	23/10468	0.260747	0.954419	0.954419	VEGFA/MYC	2
BP	GO:0000375	RNA splicing, via transesterification reactions	16/451	310/10468	0.262877	0.954419	0.954419	SRRM1/SFPQ/PRPF38A/ZC3H10/SART3/SNRPA1/NSRP1/SF3B6/SNRNP27/PCBP1/SNRPG/USP39/SMN1/SMN2/RBM22/GEMIN8	16
BP	GO:0033238	regulation of cellular amine metabolic process	4/451	61/10468	0.268006	0.954419	0.954419	PSMD3/ODC1/PSME4/PSMB8	4
BP	GO:0042278	purine nucleoside metabolic process	4/451	61/10468	0.268006	0.954419	0.954419	AHCYL1/HDDC3/APRT/AHCYL2	4
BP	GO:0045446	endothelial cell differentiation	4/451	61/10468	0.268006	0.954419	0.954419	GSTM3/ACVR1/VEGFA/RAP2C	4
BP	GO:0045639	positive regulation of myeloid cell differentiation	4/451	61/10468	0.268006	0.954419	0.954419	RUNX1/MAPK14/FOXO3/TRIB1	4
BP	GO:0022900	electron transport chain	8/451	142/10468	0.268721	0.954419	0.954419	DHRS3/SDHC/SDHD/HSD17B6/ISCU/NDUFB7/GLRX/IMMP2L	8
BP	GO:0051271	negative regulation of cellular component movement	9/451	163/10468	0.269927	0.954419	0.954419	NBL1/TPM1/RHOB/FOXO3/CITED2/GNRH1/TRIB1/SCAI/RAP2C	9
BP	GO:0007259	JAK-STAT cascade	5/451	81/10468	0.270037	0.954419	0.954419	PWP1/PKD1/CRLF3/PARP14/HES1	5
BP	GO:0045185	maintenance of protein location	5/451	81/10468	0.270037	0.954419	0.954419	NBL1/PKD1/DAND5/SPTBN4/LTBP1	5
BP	GO:0034612	response to tumor necrosis factor	10/451	184/10468	0.270212	0.954419	0.954419	CD58/PSMD3/ZFP36/ZFP36L2/PSME4/HYAL1/PSMB8/MAPK14/TNFRSF21/FOXO3	10
BP	GO:0001756	somitogenesis	3/451	42/10468	0.270614	0.954419	0.954419	ATM/TMED2/TBX6	3
BP	GO:0007422	peripheral nervous system development	3/451	42/10468	0.270614	0.954419	0.954419	ARTN/GSTM3/RUNX1	3
BP	GO:0099518	vesicle cytoskeletal trafficking	3/451	42/10468	0.270614	0.954419	0.954419	AP3S2/AP3D1/TRAK1	3
BP	GO:0110110	positive regulation of animal organ morphogenesis	3/451	42/10468	0.270614	0.954419	0.954419	ACVR1/VEGFA/MYC	3
BP	GO:0048705	skeletal system morphogenesis	7/451	122/10468	0.272881	0.954419	0.954419	DHRS3/CHSY1/PKD1/HYAL1/TIPARP/FGF18/MAPK14	7
BP	GO:0051170	import into nucleus	7/451	122/10468	0.272881	0.954419	0.954419	NUP85/SNRPG/SMN1/SMN2/RBM22/MAPK14/GEMIN8	7
BP	GO:0006066	alcohol metabolic process	12/451	227/10468	0.273894	0.954419	0.954419	DHRS3/HSD17B7/LBR/GGPS1/CYP2R1/DPAGT1/SULT1A3/SPR/PLCL1/SCAP/COQ2/PCBD2	12
BP	GO:1901605	alpha-amino acid metabolic process	8/451	143/10468	0.274929	0.954419	0.954419	MTHFR/AHCYL1/GLUL/PYCR2/ACAT1/ODC1/GAD1/AHCYL2	8
BP	GO:0006732	coenzyme metabolic process	16/451	313/10468	0.275325	0.954419	0.954419	ACOT7/MTHFR/AHCYL1/MPC2/HKDC1/ECD/ACAT1/ACSM3/ALDOC/NUP85/SPR/SEC13/COQ2/PCBD2/AHCYL2/COQ4	16
BP	GO:1902105	regulation of leukocyte differentiation	9/451	164/10468	0.27572	0.954419	0.954419	ZNF683/AP3D1/ZFP36L2/CEBPB/RUNX1/AGER/MYB/TRIB1/MYC	9
BP	GO:0034101	erythrocyte homeostasis	6/451	102/10468	0.276317	0.954419	0.954419	ZFP36/HSPA9/MAPK14/VEGFA/FOXO3/HIPK2	6
BP	GO:0043618	regulation of transcription from RNA polymerase II promoter in response to stress	6/451	102/10468	0.276317	0.954419	0.954419	PSMD3/PSME4/CEBPB/PSMB8/VEGFA/CITED2	6
BP	GO:0001658	branching involved in ureteric bud morphogenesis	2/451	24/10468	0.276967	0.954419	0.954419	VEGFA/MYC	2
BP	GO:0001912	positive regulation of leukocyte mediated cytotoxicity	2/451	24/10468	0.276967	0.954419	0.954419	MICB/ULBP2	2
BP	GO:0002714	positive regulation of B cell mediated immunity	2/451	24/10468	0.276967	0.954419	0.954419	EXOSC6/ATAD5	2
BP	GO:0002891	positive regulation of immunoglobulin mediated immune response	2/451	24/10468	0.276967	0.954419	0.954419	EXOSC6/ATAD5	2
BP	GO:0007140	male meiotic nuclear division	2/451	24/10468	0.276967	0.954419	0.954419	ATM/SPDYA	2
BP	GO:0007566	embryo implantation	2/451	24/10468	0.276967	0.954419	0.954419	UBE2Q1/SMURF2	2
BP	GO:0009948	anterior/posterior axis specification	2/451	24/10468	0.276967	0.954419	0.954419	TMED2/TBX6	2
BP	GO:0014014	negative regulation of gliogenesis	2/451	24/10468	0.276967	0.954419	0.954419	DLX1/HES1	2
BP	GO:0034113	heterotypic cell-cell adhesion	2/451	24/10468	0.276967	0.954419	0.954419	CD58/AGER	2
BP	GO:0034405	response to fluid shear stress	2/451	24/10468	0.276967	0.954419	0.954419	PKD1/CITED2	2
BP	GO:0034661	ncRNA catabolic process	2/451	24/10468	0.276967	0.954419	0.954419	EXOSC6/EXOSC2	2
BP	GO:0036003	positive regulation of transcription from RNA polymerase II promoter in response to stress	2/451	24/10468	0.276967	0.954419	0.954419	CEBPB/VEGFA	2
BP	GO:0045648	positive regulation of erythrocyte differentiation	2/451	24/10468	0.276967	0.954419	0.954419	MAPK14/FOXO3	2
BP	GO:0070129	regulation of mitochondrial translation	2/451	24/10468	0.276967	0.954419	0.954419	NSUN4/TRUB2	2
BP	GO:1901661	quinone metabolic process	2/451	24/10468	0.276967	0.954419	0.954419	COQ2/COQ4	2
BP	GO:2000765	regulation of cytoplasmic translation	2/451	24/10468	0.276967	0.954419	0.954419	EEF2/CPEB4	2
BP	GO:0000380	alternative mRNA splicing, via spliceosome	4/451	62/10468	0.27767	0.954419	0.954419	SFPQ/ZC3H10/SART3/NSRP1	4
BP	GO:0006493	protein O-linked glycosylation	4/451	62/10468	0.27767	0.954419	0.954419	GALNT5/SDF2L1/TRAK1/XXYLT1	4
BP	GO:0006901	vesicle coating	4/451	62/10468	0.27767	0.954419	0.954419	TMED2/SEC23A/SEC13/SEC24B	4
BP	GO:0090502	RNA phosphodiester bond hydrolysis, endonucleolytic	4/451	62/10468	0.27767	0.954419	0.954419	AGO1/FEN1/RPP21/POP7	4
BP	GO:1904019	epithelial cell apoptotic process	4/451	62/10468	0.27767	0.954419	0.954419	SORT1/PAK4/ZFP36/FOXO3	4
BP	GO:0009792	embryo development ending in birth or egg hatching	22/451	444/10468	0.277986	0.954419	0.954419	MTHFR/HSD17B7/GPR161/NPAT/ATM/TMED2/TPM1/PKD1/TBX6/BPTF/ASF1B/SF3B6/EN1/HS6ST1/ACVR1/DLX1/CEBPB/HYAL1/HES1/SEC24B/VEGFA/ZFPM2	22
BP	GO:0044344	cellular response to fibroblast growth factor stimulus	5/451	82/10468	0.278378	0.954419	0.954419	ZFP36/ZFP36L2/HYAL1/FGF18/FRS3	5
BP	GO:0030177	positive regulation of Wnt signaling pathway	7/451	123/10468	0.279643	0.954419	0.954419	BAMBI/GPRC5B/PSMD3/SMURF2/PSME4/USP34/PSMB8	7
BP	GO:1903708	positive regulation of hemopoiesis	7/451	123/10468	0.279643	0.954419	0.954419	AP3D1/RUNX1/AGER/MAPK14/FOXO3/MYB/TRIB1	7
BP	GO:0051186	cofactor metabolic process	22/451	445/10468	0.281528	0.954419	0.954419	ACOT7/MTHFR/UROD/GSTM3/AHCYL1/MPC2/HKDC1/ECD/ACAT1/ISCU/NUBP1/ACSM3/ALDOC/NUP85/BLVRB/SPR/SEC13/COQ2/PCBD2/HSPA9/AHCYL2/COQ4	22
BP	GO:0007283	spermatogenesis	15/451	293/10468	0.281988	0.954419	0.954419	TESK2/ARID4B/DUSP13/HERC2/TYRO3/CATSPER2/SNRPA1/SPATA20/PCSK4/ASF1B/PSME4/CLOCK/IMMP2L/TTC26/SPATA31C1	15
BP	GO:0031349	positive regulation of defense response	15/451	293/10468	0.281988	0.954419	0.954419	SFPQ/PTGER3/PSPC1/TYRO3/GPRC5B/PSMD3/EPG5/PSME4/CEBPB/CLOCK/PSMB8/MICB/MAPK13/ULBP2/LRRC14	15
BP	GO:0007080	mitotic metaphase plate congression	3/451	43/10468	0.282463	0.954419	0.954419	CDT1/CENPC/BOD1	3
BP	GO:0008344	adult locomotory behavior	3/451	43/10468	0.282463	0.954419	0.954419	SPTBN4/EN1/HIPK2	3
BP	GO:0014812	muscle cell migration	3/451	43/10468	0.282463	0.954419	0.954419	TPM1/AAMP/TRIB1	3
BP	GO:0032755	positive regulation of interleukin-6 production	3/451	43/10468	0.282463	0.954419	0.954419	TBC1D23/AGER/MAPK13	3
BP	GO:0035308	negative regulation of protein dephosphorylation	3/451	43/10468	0.282463	0.954419	0.954419	ENSA/YWHAE/BOD1	3
BP	GO:0042632	cholesterol homeostasis	3/451	43/10468	0.282463	0.954419	0.954419	ACSM3/MTTP/MYLIP	3
BP	GO:1903201	regulation of oxidative stress-induced cell death	3/451	43/10468	0.282463	0.954419	0.954419	SFPQ/MCL1/FOXO3	3
BP	GO:2001244	positive regulation of intrinsic apoptotic signaling pathway	3/451	43/10468	0.282463	0.954419	0.954419	RPL11/SFPQ/MCL1	3
BP	GO:0008360	regulation of cell shape	6/451	103/10468	0.283779	0.954419	0.954419	BAMBI/MARK2/TPM1/RHOB/PLXNB1/VEGFA	6
BP	GO:0090316	positive regulation of intracellular protein transport	7/451	124/10468	0.286447	0.954419	0.954419	PLK3/YWHAE/NPEPPS/SAE1/RBM22/MAPK14/PCM1	7
BP	GO:0060828	regulation of canonical Wnt signaling pathway	10/451	187/10468	0.286647	0.954419	0.954419	BAMBI/GPRC5B/PSMD3/SMURF2/PSME4/USP34/PSMB8/MAPK14/FOXO3/GNAQ	10
BP	GO:0000079	regulation of cyclin-dependent protein serine/threonine kinase activity	5/451	83/10468	0.286771	0.954419	0.954419	CCND2/PKD1/CDC6/CDC37/SPDYA	5
BP	GO:0097696	STAT cascade	5/451	83/10468	0.286771	0.954419	0.954419	PWP1/PKD1/CRLF3/PARP14/HES1	5
BP	GO:0042089	cytokine biosynthetic process	4/451	63/10468	0.287388	0.954419	0.954419	ZFP36/TRIB2/CEBPB/AGER	4
BP	GO:0042107	cytokine metabolic process	4/451	63/10468	0.287388	0.954419	0.954419	ZFP36/TRIB2/CEBPB/AGER	4
BP	GO:0043044	ATP-dependent chromatin remodeling	4/451	63/10468	0.287388	0.954419	0.954419	SMARCC2/OIP5/PSME4/CENPC	4
BP	GO:0046887	positive regulation of hormone secretion	4/451	63/10468	0.287388	0.954419	0.954419	MPC2/GLUL/C2CD2L/MYB	4
BP	GO:0001525	angiogenesis	14/451	273/10468	0.288937	0.954419	0.954419	AGO1/GLUL/UNC5B/PAK4/RHOB/HS6ST1/ACVR1/AAMP/RUNX1/HYAL1/FGF18/MAPK14/VEGFA/HIPK2	14
BP	GO:0051348	negative regulation of transferase activity	11/451	209/10468	0.290622	0.954419	0.954419	RPL11/AJUBA/RPTOR/MIDN/ZFP36/TRIB2/PPM1F/PRKAR2A/PRKRIP1/TRIB1/GNAQ	11
BP	GO:0030307	positive regulation of cell growth	6/451	104/10468	0.291286	0.954419	0.954419	RPS6KA1/RPTOR/HYAL1/ZNF639/VEGFA/EXOSC2	6
BP	GO:0050727	regulation of inflammatory response	10/451	188/10468	0.292188	0.954419	0.954419	PTGER3/ATM/TYRO3/GPRC5B/CEBPB/TBC1D23/CLOCK/AGER/MAPK14/MAPK13	10
BP	GO:0018345	protein palmitoylation	2/451	25/10468	0.293164	0.954419	0.954419	GLUL/ZDHHC19	2
BP	GO:0034383	low-density lipoprotein particle clearance	2/451	25/10468	0.293164	0.954419	0.954419	AP2S1/MYLIP	2
BP	GO:0060043	regulation of cardiac muscle cell proliferation	2/451	25/10468	0.293164	0.954419	0.954419	MAPK14/ZFPM2	2
BP	GO:0061900	glial cell activation	2/451	25/10468	0.293164	0.954419	0.954419	ATM/AGER	2
BP	GO:0071604	transforming growth factor beta production	2/451	25/10468	0.293164	0.954419	0.954419	LTBP1/MYB	2
BP	GO:0086003	cardiac muscle cell contraction	2/451	25/10468	0.293164	0.954419	0.954419	RNF207/NOS1AP	2
BP	GO:2000058	regulation of ubiquitin-dependent protein catabolic process	7/451	125/10468	0.293289	0.954419	0.954419	RPL11/PLK3/TRIB2/CAMLG/HIPK2/RNF139/TRIB1	7
BP	GO:0001523	retinoid metabolic process	3/451	44/10468	0.294355	0.954419	0.954419	DHRS3/GPC6/CYP2S1	3
BP	GO:0014032	neural crest cell development	3/451	44/10468	0.294355	0.954419	0.954419	ACVR1/HES1/EFNB1	3
BP	GO:0031341	regulation of cell killing	3/451	44/10468	0.294355	0.954419	0.954419	AGER/MICB/ULBP2	3
BP	GO:0042100	B cell proliferation	3/451	44/10468	0.294355	0.954419	0.954419	ATM/ATAD5/TNFRSF21	3
BP	GO:0055092	sterol homeostasis	3/451	44/10468	0.294355	0.954419	0.954419	ACSM3/MTTP/MYLIP	3
BP	GO:2000059	negative regulation of ubiquitin-dependent protein catabolic process	3/451	44/10468	0.294355	0.954419	0.954419	RPL11/CAMLG/HIPK2	3
BP	GO:0051272	positive regulation of cellular component movement	15/451	296/10468	0.2952	0.954419	0.954419	RNF207/NOS1AP/ATM/SMURF2/RHOB/ACVR1/AAMP/PPM1F/CAPN7/ELP6/HYAL1/FGF18/AGER/MAPK14/VEGFA	15
BP	GO:0002706	regulation of lymphocyte mediated immunity	5/451	84/10468	0.295209	0.954419	0.954419	EXOSC6/ATAD5/AGER/MICB/ULBP2	5
BP	GO:0030595	leukocyte chemotaxis	5/451	84/10468	0.295209	0.954419	0.954419	NBL1/NUP85/PIP5K1C/MAPK14/VEGFA	5
BP	GO:0071774	response to fibroblast growth factor	5/451	84/10468	0.295209	0.954419	0.954419	ZFP36/ZFP36L2/HYAL1/FGF18/FRS3	5
BP	GO:0098813	nuclear chromosome segregation	11/451	210/10468	0.295888	0.954419	0.954419	SFPQ/MSTO1/FEN1/ATM/NUSAP1/CDT1/CDC6/STAG1/CENPC/BOD1/STAG3L2	11
BP	GO:0007044	cell-substrate junction assembly	4/451	64/10468	0.297154	0.954419	0.954419	TESK2/AJUBA/PPM1F/VEGFA	4
BP	GO:0010811	positive regulation of cell-substrate adhesion	4/451	64/10468	0.297154	0.954419	0.954419	PPM1F/EGFLAM/VEGFA/COL26A1	4
BP	GO:0042273	ribosomal large subunit biogenesis	4/451	64/10468	0.297154	0.954419	0.954419	MRTO4/RPL11/AAMP/SDAD1	4
BP	GO:0042590	antigen processing and presentation of exogenous peptide antigen via MHC class I	4/451	64/10468	0.297154	0.954419	0.954419	SNAP23/PSMD3/PSME4/PSMB8	4
BP	GO:0090114	COPII-coated vesicle budding	4/451	64/10468	0.297154	0.954419	0.954419	TMED2/SEC23A/SEC13/SEC24B	4
BP	GO:0031347	regulation of defense response	22/451	450/10468	0.299474	0.954419	0.954419	SFPQ/PTGER3/ATM/PSPC1/TYRO3/GPRC5B/PSMD3/EPG5/CDC37/PSME4/CEBPB/TBC1D23/PARP14/CLOCK/ELMOD2/AGER/PSMB8/MICB/MAPK14/MAPK13/ULBP2/LRRC14	22
BP	GO:0043393	regulation of protein binding	8/451	147/10468	0.300136	0.954419	0.954419	RPL11/PTPRF/BAMBI/MARK2/PKD1/PLCL1/LRPAP1/HIPK2	8
BP	GO:0002064	epithelial cell development	7/451	126/10468	0.300168	0.954419	0.954419	GSTM3/ARID4B/SIPA1L3/CLOCK/SEC24B/VEGFA/RAP2C	7
BP	GO:0070972	protein localization to endoplasmic reticulum	7/451	126/10468	0.300168	0.954419	0.954419	RPL22/RPL11/RPS27/SRP9/RPL41/RPS29/SRP14	7
BP	GO:1903522	regulation of blood circulation	7/451	126/10468	0.300168	0.954419	0.954419	RNF207/AHCYL1/NOS1AP/TPM1/YWHAE/SPTBN4/AGER	7
BP	GO:0045596	negative regulation of cell differentiation	19/451	385/10468	0.302753	0.954419	0.954419	SORT1/GDF11/MEIS2/TBX6/ZFP36/TRIB2/ZFP36L2/DLX1/RUNX1/HES1/HSPA9/MYLIP/VEGFA/FOXO3/PCM1/GNRH1/ZFPM2/TRIB1/MYC	19
BP	GO:0044106	cellular amine metabolic process	5/451	85/10468	0.30369	0.954419	0.954419	SRM/PSMD3/ODC1/PSME4/PSMB8	5
BP	GO:0001655	urogenital system development	9/451	169/10468	0.30519	0.954419	0.954419	ACAT1/GDF11/PKD1/NUP85/ODC1/TIPARP/HES1/VEGFA/MYC	9
BP	GO:0001570	vasculogenesis	3/451	45/10468	0.306278	0.954419	0.954419	TIPARP/VEGFA/ZFPM2	3
BP	GO:0045652	regulation of megakaryocyte differentiation	3/451	45/10468	0.306278	0.954419	0.954419	AGO1/SETD1A/RUNX1	3
BP	GO:0071230	cellular response to amino acid stimulus	3/451	45/10468	0.306278	0.954419	0.954419	RPTOR/CEBPB/CPEB4	3
BP	GO:0090276	regulation of peptide hormone secretion	6/451	106/10468	0.306417	0.954419	0.954419	ENSA/MPC2/GLUL/C2CD2L/MIDN/CLOCK	6
BP	GO:0030534	adult behavior	4/451	65/10468	0.306961	0.954419	0.954419	ZFHX2/SPTBN4/EN1/HIPK2	4
BP	GO:0061337	cardiac conduction	4/451	65/10468	0.306961	0.954419	0.954419	RNF207/AHCYL1/YWHAE/SPTBN4	4
BP	GO:0072395	signal transduction involved in cell cycle checkpoint	4/451	65/10468	0.306961	0.954419	0.954419	PLK3/DTL/ATM/ARID3A	4
BP	GO:0072401	signal transduction involved in DNA integrity checkpoint	4/451	65/10468	0.306961	0.954419	0.954419	PLK3/DTL/ATM/ARID3A	4
BP	GO:0072422	signal transduction involved in DNA damage checkpoint	4/451	65/10468	0.306961	0.954419	0.954419	PLK3/DTL/ATM/ARID3A	4
BP	GO:2000117	negative regulation of cysteine-type endopeptidase activity	4/451	65/10468	0.306961	0.954419	0.954419	RPS6KA1/IFI6/YWHAE/VEGFA	4
BP	GO:2001237	negative regulation of extrinsic apoptotic signaling pathway	4/451	65/10468	0.306961	0.954419	0.954419	IFI6/MCL1/UNC5B/ACVR1	4
BP	GO:0051099	positive regulation of binding	7/451	127/10468	0.307081	0.954419	0.954419	RPL11/BAMBI/PKD1/CDT1/PLCL1/HES1/HIPK2	7
BP	GO:0000027	ribosomal large subunit assembly	2/451	26/10468	0.309311	0.954419	0.954419	MRTO4/RPL11	2
BP	GO:0002762	negative regulation of myeloid leukocyte differentiation	2/451	26/10468	0.309311	0.954419	0.954419	TRIB1/MYC	2
BP	GO:0006040	amino sugar metabolic process	2/451	26/10468	0.309311	0.954419	0.954419	NPL/DPAGT1	2
BP	GO:0006515	protein quality control for misfolded or incompletely synthesized proteins	2/451	26/10468	0.309311	0.954419	0.954419	UGGT1/SDF2L1	2
BP	GO:0006584	catecholamine metabolic process	2/451	26/10468	0.309311	0.954419	0.954419	SULT1A3/SULT1A4	2
BP	GO:0009712	catechol-containing compound metabolic process	2/451	26/10468	0.309311	0.954419	0.954419	SULT1A3/SULT1A4	2
BP	GO:0010518	positive regulation of phospholipase activity	2/451	26/10468	0.309311	0.954419	0.954419	ARL1/GNAQ	2
BP	GO:0010765	positive regulation of sodium ion transport	2/451	26/10468	0.309311	0.954419	0.954419	AHCYL1/GLRX	2
BP	GO:0010862	positive regulation of pathway-restricted SMAD protein phosphorylation	2/451	26/10468	0.309311	0.954419	0.954419	GDF11/ACVR1	2
BP	GO:0032201	telomere maintenance via semi-conservative replication	2/451	26/10468	0.309311	0.954419	0.954419	FEN1/PRIM2	2
BP	GO:0042168	heme metabolic process	2/451	26/10468	0.309311	0.954419	0.954419	UROD/BLVRB	2
BP	GO:0042181	ketone biosynthetic process	2/451	26/10468	0.309311	0.954419	0.954419	COQ2/COQ4	2
BP	GO:0042551	neuron maturation	2/451	26/10468	0.309311	0.954419	0.954419	TBX6/SPTBN4	2
BP	GO:0050686	negative regulation of mRNA processing	2/451	26/10468	0.309311	0.954419	0.954419	ZC3H14/SUPT5H	2
BP	GO:0060113	inner ear receptor cell differentiation	2/451	26/10468	0.309311	0.954419	0.954419	HES1/SEC24B	2
BP	GO:0061157	mRNA destabilization	2/451	26/10468	0.309311	0.954419	0.954419	ZFP36/ZFP36L2	2
BP	GO:0072529	pyrimidine-containing compound catabolic process	2/451	26/10468	0.309311	0.954419	0.954419	UNG/NEIL1	2
BP	GO:0098900	regulation of action potential	2/451	26/10468	0.309311	0.954419	0.954419	RNF207/NOS1AP	2
BP	GO:1902751	positive regulation of cell cycle G2/M phase transition	2/451	26/10468	0.309311	0.954419	0.954419	DTL/ATAD5	2
BP	GO:2000351	regulation of endothelial cell apoptotic process	2/451	26/10468	0.309311	0.954419	0.954419	PAK4/FOXO3	2
BP	GO:0002696	positive regulation of leukocyte activation	9/451	170/10468	0.311174	0.954419	0.954419	EXOSC6/ATAD5/AP3D1/RUNX1/HES1/AGER/HLA-DPB1/MYB/EFNB1	9
BP	GO:0061013	regulation of mRNA catabolic process	9/451	170/10468	0.311174	0.954419	0.954419	ZC3H14/EXOSC6/PSMD3/ZFP36/ZFP36L2/PSME4/PSMB8/MAPK14/EXOSC2	9
BP	GO:1901342	regulation of vasculature development	9/451	170/10468	0.311174	0.954419	0.954419	AGO1/GLUL/PAK4/RHOB/RUNX1/HYAL1/FGF18/VEGFA/HIPK2	9
BP	GO:0006304	DNA modification	5/451	86/10468	0.312206	0.954419	0.954419	ALKBH2/UNG/NEIL1/EXOSC6/MYC	5
BP	GO:0014065	phosphatidylinositol 3-kinase signaling	5/451	86/10468	0.312206	0.954419	0.954419	UNC5B/TYRO3/PIP5K1C/EPOR/PLXNB1	5
BP	GO:0019751	polyol metabolic process	5/451	86/10468	0.312206	0.954419	0.954419	CYP2R1/SPR/PLCL1/COQ2/PCBD2	5
BP	GO:1904029	regulation of cyclin-dependent protein kinase activity	5/451	86/10468	0.312206	0.954419	0.954419	CCND2/PKD1/CDC6/CDC37/SPDYA	5
BP	GO:0002573	myeloid leukocyte differentiation	7/451	128/10468	0.314025	0.954419	0.954419	LBR/CEBPB/RUNX1/MAPK14/VEGFA/TRIB1/MYC	7
BP	GO:0002699	positive regulation of immune effector process	7/451	128/10468	0.314025	0.954419	0.954419	GPRC5B/EXOSC6/ATAD5/MICB/MAPK14/MYB/ULBP2	7
BP	GO:0007179	transforming growth factor beta receptor signaling pathway	7/451	128/10468	0.314025	0.954419	0.954419	BAMBI/SMURF2/DAND5/LTBP1/ACVR1/CITED2/HIPK2	7
BP	GO:0030072	peptide hormone secretion	7/451	128/10468	0.314025	0.954419	0.954419	ENSA/UBE2Q1/MPC2/GLUL/C2CD2L/MIDN/CLOCK	7
BP	GO:0034249	negative regulation of cellular amide metabolic process	7/451	128/10468	0.314025	0.954419	0.954419	AGO1/SRP9/EIF4EBP2/ZFP36/ZFP36L2/CPEB4/RNF139	7
BP	GO:0016571	histone methylation	6/451	107/10468	0.314035	0.954419	0.954419	MTHFR/ARID4B/PWP1/SETD1A/MYB/PHF19	6
BP	GO:0000288	nuclear-transcribed mRNA catabolic process, deadenylation-dependent decay	4/451	66/10468	0.3168	0.954419	0.954419	EXOSC6/ZFP36/ZFP36L2/EXOSC2	4
BP	GO:0007188	adenylate cyclase-modulating G protein-coupled receptor signaling pathway	4/451	66/10468	0.3168	0.954419	0.954419	PTGER3/GPR161/GRK5/GNAQ	4
BP	GO:0008037	cell recognition	4/451	66/10468	0.3168	0.954419	0.954419	ROBO3/CATSPER2/PCSK4/TNFRSF21	4
BP	GO:0051303	establishment of chromosome localization	4/451	66/10468	0.3168	0.954419	0.954419	ATM/CDT1/CENPC/BOD1	4
BP	GO:1903038	negative regulation of leukocyte cell-cell adhesion	4/451	66/10468	0.3168	0.954419	0.954419	CEBPB/RUNX1/TNFRSF21/GNRH1	4
BP	GO:0007215	glutamate receptor signaling pathway	3/451	46/10468	0.31822	0.954419	0.954419	SULT1A3/CPEB4/GNAQ	3
BP	GO:0009064	glutamine family amino acid metabolic process	3/451	46/10468	0.31822	0.954419	0.954419	GLUL/PYCR2/GAD1	3
BP	GO:0014031	mesenchymal cell development	3/451	46/10468	0.31822	0.954419	0.954419	ACVR1/HES1/EFNB1	3
BP	GO:0042136	neurotransmitter biosynthetic process	3/451	46/10468	0.31822	0.954419	0.954419	NOS1AP/SPR/GAD1	3
BP	GO:0043266	regulation of potassium ion transport	3/451	46/10468	0.31822	0.954419	0.954419	RNF207/NOS1AP/YWHAE	3
BP	GO:0046427	positive regulation of JAK-STAT cascade	3/451	46/10468	0.31822	0.954419	0.954419	CRLF3/PARP14/HES1	3
BP	GO:0046854	phosphatidylinositol phosphorylation	3/451	46/10468	0.31822	0.954419	0.954419	PI4KB/SMG1/PIP5K1C	3
BP	GO:0006470	protein dephosphorylation	12/451	236/10468	0.31911	0.954419	0.954419	PTPRF/CTTNBP2NL/ENSA/DUSP23/DUSP13/PTPN21/YWHAE/SSH2/PPM1F/PPA2/BOD1/PPP1R3B	12
BP	GO:0048562	embryonic organ morphogenesis	8/451	150/10468	0.319377	0.954419	0.954419	RNF207/TMED2/TBX6/ACVR1/HYAL1/HES1/SEC24B/HIPK2	8
BP	GO:0030260	entry into host cell	5/451	87/10468	0.320755	0.954419	0.954419	VPS18/TYRO3/HYAL1/ZNF639/GYPA	5
BP	GO:0044409	entry into host	5/451	87/10468	0.320755	0.954419	0.954419	VPS18/TYRO3/HYAL1/ZNF639/GYPA	5
BP	GO:0051806	entry into cell of other organism involved in symbiotic interaction	5/451	87/10468	0.320755	0.954419	0.954419	VPS18/TYRO3/HYAL1/ZNF639/GYPA	5
BP	GO:0051828	entry into other organism involved in symbiotic interaction	5/451	87/10468	0.320755	0.954419	0.954419	VPS18/TYRO3/HYAL1/ZNF639/GYPA	5
BP	GO:0032543	mitochondrial translation	7/451	129/10468	0.320998	0.954419	0.954419	NSUN4/DAP3/MRPL49/YARS2/MRPL38/MRPS33/TRUB2	7
BP	GO:0030099	myeloid cell differentiation	14/451	280/10468	0.321497	0.954419	0.954419	AGO1/LBR/MEIS2/SETD1A/ZFP36/CEBPB/RUNX1/HSPA9/MAPK14/VEGFA/FOXO3/HIPK2/TRIB1/MYC	14
BP	GO:0071900	regulation of protein serine/threonine kinase activity	17/451	346/10468	0.322754	0.954419	0.954419	CCND2/AJUBA/MAP4K5/PKD1/CDC6/RPTOR/CDC37/TRIB2/SPDYA/PRKAR2A/TNIK/FGF18/AGER/MAPK14/VEGFA/TRIB1/GADD45G	17
BP	GO:0023061	signal release	12/451	237/10468	0.324246	0.954419	0.954419	ENSA/UBE2Q1/MPC2/GLUL/C2CD2L/VPS18/SNAP23/MIDN/PIP5K1C/GAD1/CLOCK/MYB	12
BP	GO:0007218	neuropeptide signaling pathway	2/451	27/10468	0.325382	0.954419	0.954419	SORT1/TYRO3	2
BP	GO:0007632	visual behavior	2/451	27/10468	0.325382	0.954419	0.954419	MEIS2/DYNLRB1	2
BP	GO:0009303	rRNA transcription	2/451	27/10468	0.325382	0.954419	0.954419	PWP1/POLR1E	2
BP	GO:0034080	CENP-A containing nucleosome assembly	2/451	27/10468	0.325382	0.954419	0.954419	OIP5/CENPC	2
BP	GO:0042267	natural killer cell mediated cytotoxicity	2/451	27/10468	0.325382	0.954419	0.954419	MICB/ULBP2	2
BP	GO:0045911	positive regulation of DNA recombination	2/451	27/10468	0.325382	0.954419	0.954419	EXOSC6/ATAD5	2
BP	GO:0055010	ventricular cardiac muscle tissue morphogenesis	2/451	27/10468	0.325382	0.954419	0.954419	TPM1/ZFPM2	2
BP	GO:0055025	positive regulation of cardiac muscle tissue development	2/451	27/10468	0.325382	0.954419	0.954419	MAPK14/ZFPM2	2
BP	GO:0061641	CENP-A containing chromatin organization	2/451	27/10468	0.325382	0.954419	0.954419	OIP5/CENPC	2
BP	GO:0071108	protein K48-linked deubiquitination	2/451	27/10468	0.325382	0.954419	0.954419	DESI2/USP34	2
BP	GO:0150076	neuroinflammatory response	2/451	27/10468	0.325382	0.954419	0.954419	ATM/AGER	2
BP	GO:1903428	positive regulation of reactive oxygen species biosynthetic process	2/451	27/10468	0.325382	0.954419	0.954419	NOS1AP/FOXO3	2
BP	GO:0010498	proteasomal protein catabolic process	20/451	413/10468	0.32625	0.954419	0.954419	FBXO2/FBXO44/RPL11/PLK3/HECTD3/CUL5/HERC2/PKD1/PSMD3/SMURF2/TRIB2/PSME4/UGGT1/SDF2L1/CLOCK/CAMLG/PSMB8/RNF139/TRIB1/UBE2R2	20
BP	GO:0032675	regulation of interleukin-6 production	4/451	67/10468	0.326664	0.954419	0.954419	CEBPB/TBC1D23/AGER/MAPK13	4
BP	GO:0050000	chromosome localization	4/451	67/10468	0.326664	0.954419	0.954419	ATM/CDT1/CENPC/BOD1	4
BP	GO:0070301	cellular response to hydrogen peroxide	4/451	67/10468	0.326664	0.954419	0.954419	RHOB/MAPK13/FOXO3/MYB	4
BP	GO:0033674	positive regulation of kinase activity	18/451	369/10468	0.326893	0.954419	0.954419	CLSPN/MARK2/CCND2/AJUBA/MAP4K5/PKD1/GPRC5B/CDC6/RPTOR/PAK4/SPDYA/PRKAR2A/TNIK/FGF18/AGER/MAPK14/VEGFA/GADD45G	18
BP	GO:0070555	response to interleukin-1	7/451	130/10468	0.327997	0.954419	0.954419	MTHFR/PSMD3/PSME4/CEBPB/HYAL1/PSMB8/MAPK13	7
BP	GO:0040013	negative regulation of locomotion	9/451	173/10468	0.329274	0.954419	0.954419	NBL1/TPM1/RHOB/FOXO3/CITED2/GNRH1/TRIB1/SCAI/RAP2C	9
BP	GO:0034968	histone lysine methylation	5/451	88/10468	0.32933	0.954419	0.954419	ARID4B/PWP1/SETD1A/MYB/PHF19	5
BP	GO:0048015	phosphatidylinositol-mediated signaling	6/451	109/10468	0.329357	0.954419	0.954419	PI4KB/UNC5B/TYRO3/PIP5K1C/EPOR/PLXNB1	6
BP	GO:0050866	negative regulation of cell activation	6/451	109/10468	0.329357	0.954419	0.954419	ATM/TYRO3/CEBPB/RUNX1/TNFRSF21/GNRH1	6
BP	GO:0006879	cellular iron ion homeostasis	3/451	47/10468	0.330167	0.954419	0.954419	ISCU/NUBP1/MYC	3
BP	GO:0014068	positive regulation of phosphatidylinositol 3-kinase signaling	3/451	47/10468	0.330167	0.954419	0.954419	UNC5B/EPOR/PLXNB1	3
BP	GO:0016101	diterpenoid metabolic process	3/451	47/10468	0.330167	0.954419	0.954419	DHRS3/GPC6/CYP2S1	3
BP	GO:0043507	positive regulation of JUN kinase activity	3/451	47/10468	0.330167	0.954419	0.954419	MAP4K5/TNIK/AGER	3
BP	GO:0045682	regulation of epidermis development	3/451	47/10468	0.330167	0.954419	0.954419	ZFP36/RUNX1/HES1	3
BP	GO:0048864	stem cell development	3/451	47/10468	0.330167	0.954419	0.954419	ACVR1/HES1/EFNB1	3
BP	GO:0060333	interferon-gamma-mediated signaling pathway	3/451	47/10468	0.330167	0.954419	0.954419	CDC37/PARP14/HLA-DPB1	3
BP	GO:1904894	positive regulation of STAT cascade	3/451	47/10468	0.330167	0.954419	0.954419	CRLF3/PARP14/HES1	3
BP	GO:0030041	actin filament polymerization	7/451	131/10468	0.335019	0.954419	0.954419	LMOD1/ARPC3/COTL1/PSTPIP2/PLEKHG2/SPTBN4/CAPG	7
BP	GO:0016570	histone modification	18/451	371/10468	0.3352	0.954419	0.954419	MTHFR/SFPQ/ARID4B/ATM/KANSL2/PWP1/SART3/SETD1A/BRD7/ATXN7L3/KAT7/PPM1F/ATXN7/CLOCK/C6orf89/VEGFA/MYB/PHF19	18
BP	GO:0007187	G protein-coupled receptor signaling pathway, coupled to cyclic nucleotide second messenger	4/451	68/10468	0.336547	0.954419	0.954419	PTGER3/GPR161/GRK5/GNAQ	4
BP	GO:0014013	regulation of gliogenesis	4/451	68/10468	0.336547	0.954419	0.954419	DLX1/HES1/TNFRSF21/MYB	4
BP	GO:0071158	positive regulation of cell cycle arrest	4/451	68/10468	0.336547	0.954419	0.954419	PLK3/ATM/CRLF3/ARID3A	4
BP	GO:0008016	regulation of heart contraction	6/451	110/10468	0.337055	0.954419	0.954419	RNF207/AHCYL1/NOS1AP/TPM1/YWHAE/SPTBN4	6
BP	GO:0006900	vesicle budding from membrane	5/451	89/10468	0.337928	0.954419	0.954419	TMED2/SEC23A/AP3D1/SEC13/SEC24B	5
BP	GO:0009308	amine metabolic process	5/451	89/10468	0.337928	0.954419	0.954419	SRM/PSMD3/ODC1/PSME4/PSMB8	5
BP	GO:0036503	ERAD pathway	5/451	89/10468	0.337928	0.954419	0.954419	FBXO2/FBXO44/UGGT1/SDF2L1/RNF139	5
BP	GO:0061351	neural precursor cell proliferation	5/451	89/10468	0.337928	0.954419	0.954419	ARTN/PSMG1/VEGFA/FOXO3/PCM1	5
BP	GO:0071322	cellular response to carbohydrate stimulus	5/451	89/10468	0.337928	0.954419	0.954419	MPC2/C2CD2L/AGER/MAPK13/FOXO3	5
BP	GO:0060485	mesenchyme development	8/451	153/10468	0.338845	0.954419	0.954419	BAMBI/DAND5/ACVR1/HES1/CITED2/ZFPM2/MYC/EFNB1	8
BP	GO:0007600	sensory perception	11/451	218/10468	0.338856	0.954419	0.954419	DHRS3/TIMM8B/BBS10/ZFHX2/REEP6/OLFM2/SPTBN4/FBXO11/ATXN7/CRYGS/RRH	11
BP	GO:0034248	regulation of cellular amide metabolic process	16/451	328/10468	0.34026	0.954419	0.954419	RPL22/RPS6KA1/AGO1/PLK3/NSUN4/SRP9/DNAJC1/EIF4EBP2/EEF2/ZFP36/ZFP36L2/POLDIP3/CPEB4/FOXO3/RNF139/TRUB2	16
BP	GO:0051188	cofactor biosynthetic process	13/451	262/10468	0.340287	0.954419	0.954419	ACOT7/UROD/MPC2/HKDC1/ECD/ACAT1/ALDOC/NUP85/SPR/SEC13/COQ2/PCBD2/COQ4	13
BP	GO:0001755	neural crest cell migration	2/451	28/10468	0.341354	0.954419	0.954419	ACVR1/EFNB1	2
BP	GO:0002228	natural killer cell mediated immunity	2/451	28/10468	0.341354	0.954419	0.954419	MICB/ULBP2	2
BP	GO:0002832	negative regulation of response to biotic stimulus	2/451	28/10468	0.341354	0.954419	0.954419	MICB/TRIB1	2
BP	GO:0009394	2'-deoxyribonucleotide metabolic process	2/451	28/10468	0.341354	0.954419	0.954419	UNG/NEIL1	2
BP	GO:0030225	macrophage differentiation	2/451	28/10468	0.341354	0.954419	0.954419	VEGFA/TRIB1	2
BP	GO:0035924	cellular response to vascular endothelial growth factor stimulus	2/451	28/10468	0.341354	0.954419	0.954419	MAPK14/VEGFA	2
BP	GO:0042490	mechanoreceptor differentiation	2/451	28/10468	0.341354	0.954419	0.954419	HES1/SEC24B	2
BP	GO:0046622	positive regulation of organ growth	2/451	28/10468	0.341354	0.954419	0.954419	MAPK14/ZFPM2	2
BP	GO:0048599	oocyte development	2/451	28/10468	0.341354	0.954419	0.954419	ATM/FOXO3	2
BP	GO:0050779	RNA destabilization	2/451	28/10468	0.341354	0.954419	0.954419	ZFP36/ZFP36L2	2
BP	GO:0072132	mesenchyme morphogenesis	2/451	28/10468	0.341354	0.954419	0.954419	ACVR1/MYC	2
BP	GO:1903432	regulation of TORC1 signaling	2/451	28/10468	0.341354	0.954419	0.954419	ATM/SEC13	2
BP	GO:0046883	regulation of hormone secretion	7/451	132/10468	0.342062	0.954419	0.954419	ENSA/MPC2/GLUL/C2CD2L/MIDN/CLOCK/MYB	7
BP	GO:0002312	B cell activation involved in immune response	3/451	48/10468	0.342109	0.954419	0.954419	UNG/EXOSC6/ATAD5	3
BP	GO:0014033	neural crest cell differentiation	3/451	48/10468	0.342109	0.954419	0.954419	ACVR1/HES1/EFNB1	3
BP	GO:0042440	pigment metabolic process	3/451	48/10468	0.342109	0.954419	0.954419	UROD/APRT/BLVRB	3
BP	GO:0060191	regulation of lipase activity	3/451	48/10468	0.342109	0.954419	0.954419	SORT1/ARL1/GNAQ	3
BP	GO:0090277	positive regulation of peptide hormone secretion	3/451	48/10468	0.342109	0.954419	0.954419	MPC2/GLUL/C2CD2L	3
BP	GO:0030073	insulin secretion	6/451	111/10468	0.344774	0.954419	0.954419	ENSA/MPC2/GLUL/C2CD2L/MIDN/CLOCK	6
BP	GO:0061564	axon development	14/451	285/10468	0.345293	0.954419	0.954419	RAP1GAP/PTPRF/ARTN/UNC5B/MARK2/ROBO3/LLGL1/SPTBN4/TRAK1/PLXNB1/VEGFA/TNFRSF21/DOK2/EFNB1	14
BP	GO:0042147	retrograde transport, endosome to Golgi	4/451	69/10468	0.346442	0.954419	0.954419	ARL1/GOSR1/TMEM87B/TBC1D23	4
BP	GO:0046425	regulation of JAK-STAT cascade	4/451	69/10468	0.346442	0.954419	0.954419	PWP1/CRLF3/PARP14/HES1	4
BP	GO:0030330	DNA damage response, signal transduction by p53 class mediator	5/451	90/10468	0.346544	0.954419	0.954419	PLK3/ATM/ARID3A/FOXO3/HIPK2	5
BP	GO:0019953	sexual reproduction	22/451	463/10468	0.347728	0.954419	0.954419	TESK2/UBE2Q1/ARID4B/DUSP13/ATM/HERC2/TYRO3/CATSPER2/SNRPA1/SPATA20/PCSK4/ASF1B/SPTBN4/SPDYA/PSME4/ACVR1/CLOCK/FOXO3/IMMP2L/TTC26/SPATA31C1/NR6A1	22
BP	GO:0006479	protein methylation	7/451	133/10468	0.349124	0.954419	0.954419	MTHFR/ARID4B/PWP1/SETD1A/FBXO11/MYB/PHF19	7
BP	GO:0008213	protein alkylation	7/451	133/10468	0.349124	0.954419	0.954419	MTHFR/ARID4B/PWP1/SETD1A/FBXO11/MYB/PHF19	7
BP	GO:1901796	regulation of signal transduction by p53 class mediator	8/451	155/10468	0.351923	0.954419	0.954419	RPL11/PLK3/ATM/BRD7/ATAD5/TAF15/MAPK14/HIPK2	8
BP	GO:0007030	Golgi organization	6/451	112/10468	0.352509	0.954419	0.954419	PLK3/PDE4DIP/ARL1/TMED2/TMED7/TMED4	6
BP	GO:0035195	gene silencing by miRNA	6/451	112/10468	0.352509	0.954419	0.954419	AGO1/ZC3H10/AJUBA/NUP85/ZFP36/SEC13	6
BP	GO:0048017	inositol lipid-mediated signaling	6/451	112/10468	0.352509	0.954419	0.954419	PI4KB/UNC5B/TYRO3/PIP5K1C/EPOR/PLXNB1	6
BP	GO:0032272	negative regulation of protein polymerization	3/451	49/10468	0.354035	0.954419	0.954419	LMOD1/SPTBN4/CAPG	3
BP	GO:1901607	alpha-amino acid biosynthetic process	3/451	49/10468	0.354035	0.954419	0.954419	MTHFR/GLUL/PYCR2	3
BP	GO:0001731	formation of translation preinitiation complex	1/451	10/10468	0.356342	0.954419	0.954419	EIF2D	1
BP	GO:0002043	blood vessel endothelial cell proliferation involved in sprouting angiogenesis	1/451	10/10468	0.356342	0.954419	0.954419	VEGFA	1
BP	GO:0002091	negative regulation of receptor internalization	1/451	10/10468	0.356342	0.954419	0.954419	LRPAP1	1
BP	GO:0002693	positive regulation of cellular extravasation	1/451	10/10468	0.356342	0.954419	0.954419	AGER	1
BP	GO:0003215	cardiac right ventricle morphogenesis	1/451	10/10468	0.356342	0.954419	0.954419	ZFPM2	1
BP	GO:0006465	signal peptide processing	1/451	10/10468	0.356342	0.954419	0.954419	IMMP2L	1
BP	GO:0006646	phosphatidylethanolamine biosynthetic process	1/451	10/10468	0.356342	0.954419	0.954419	LPIN3	1
BP	GO:0007213	G protein-coupled acetylcholine receptor signaling pathway	1/451	10/10468	0.356342	0.954419	0.954419	GNAQ	1
BP	GO:0009312	oligosaccharide biosynthetic process	1/451	10/10468	0.356342	0.954419	0.954419	ST6GALNAC1	1
BP	GO:0010934	macrophage cytokine production	1/451	10/10468	0.356342	0.954419	0.954419	GPRC5B	1
BP	GO:0015669	gas transport	1/451	10/10468	0.356342	0.954419	0.954419	MYC	1
BP	GO:0016339	calcium-dependent cell-cell adhesion via plasma membrane cell adhesion molecules	1/451	10/10468	0.356342	0.954419	0.954419	AJUBA	1
BP	GO:0019896	axonal transport of mitochondrion	1/451	10/10468	0.356342	0.954419	0.954419	TRAK1	1
BP	GO:0021511	spinal cord patterning	1/451	10/10468	0.356342	0.954419	0.954419	GDF11	1
BP	GO:0030950	establishment or maintenance of actin cytoskeleton polarity	1/451	10/10468	0.356342	0.954419	0.954419	RHOB	1
BP	GO:0032332	positive regulation of chondrocyte differentiation	1/451	10/10468	0.356342	0.954419	0.954419	FGF18	1
BP	GO:0034114	regulation of heterotypic cell-cell adhesion	1/451	10/10468	0.356342	0.954419	0.954419	AGER	1
BP	GO:0034199	activation of protein kinase A activity	1/451	10/10468	0.356342	0.954419	0.954419	PRKAR2A	1
BP	GO:0035246	peptidyl-arginine N-methylation	1/451	10/10468	0.356342	0.954419	0.954419	FBXO11	1
BP	GO:0035627	ceramide transport	1/451	10/10468	0.356342	0.954419	0.954419	MTTP	1
BP	GO:0035646	endosome to melanosome transport	1/451	10/10468	0.356342	0.954419	0.954419	AP3D1	1
BP	GO:0035994	response to muscle stretch	1/451	10/10468	0.356342	0.954419	0.954419	MAPK14	1
BP	GO:0035999	tetrahydrofolate interconversion	1/451	10/10468	0.356342	0.954419	0.954419	MTHFR	1
BP	GO:0042044	fluid transport	1/451	10/10468	0.356342	0.954419	0.954419	AHCYL1	1
BP	GO:0042094	interleukin-2 biosynthetic process	1/451	10/10468	0.356342	0.954419	0.954419	ZFP36	1
BP	GO:0042249	establishment of planar polarity of embryonic epithelium	1/451	10/10468	0.356342	0.954419	0.954419	SEC24B	1
BP	GO:0042754	negative regulation of circadian rhythm	1/451	10/10468	0.356342	0.954419	0.954419	SFPQ	1
BP	GO:0043476	pigment accumulation	1/451	10/10468	0.356342	0.954419	0.954419	AP3D1	1
BP	GO:0043482	cellular pigment accumulation	1/451	10/10468	0.356342	0.954419	0.954419	AP3D1	1
BP	GO:0043485	endosome to pigment granule transport	1/451	10/10468	0.356342	0.954419	0.954419	AP3D1	1
BP	GO:0046033	AMP metabolic process	1/451	10/10468	0.356342	0.954419	0.954419	APRT	1
BP	GO:0048569	post-embryonic animal organ development	1/451	10/10468	0.356342	0.954419	0.954419	VEGFA	1
BP	GO:0048757	pigment granule maturation	1/451	10/10468	0.356342	0.954419	0.954419	AP3D1	1
BP	GO:0051409	response to nitrosative stress	1/451	10/10468	0.356342	0.954419	0.954419	ATM	1
BP	GO:0051450	myoblast proliferation	1/451	10/10468	0.356342	0.954419	0.954419	MEIS2	1
BP	GO:0060117	auditory receptor cell development	1/451	10/10468	0.356342	0.954419	0.954419	SEC24B	1
BP	GO:0060192	negative regulation of lipase activity	1/451	10/10468	0.356342	0.954419	0.954419	SORT1	1
BP	GO:0060253	negative regulation of glial cell proliferation	1/451	10/10468	0.356342	0.954419	0.954419	HES1	1
BP	GO:0061213	positive regulation of mesonephros development	1/451	10/10468	0.356342	0.954419	0.954419	VEGFA	1
BP	GO:0061217	regulation of mesonephros development	1/451	10/10468	0.356342	0.954419	0.954419	VEGFA	1
BP	GO:0061323	cell proliferation involved in heart morphogenesis	1/451	10/10468	0.356342	0.954419	0.954419	HES1	1
BP	GO:0070213	protein auto-ADP-ribosylation	1/451	10/10468	0.356342	0.954419	0.954419	TIPARP	1
BP	GO:0070977	bone maturation	1/451	10/10468	0.356342	0.954419	0.954419	PLXNB1	1
BP	GO:0072215	regulation of metanephros development	1/451	10/10468	0.356342	0.954419	0.954419	MYC	1
BP	GO:0072697	protein localization to cell cortex	1/451	10/10468	0.356342	0.954419	0.954419	NUBP1	1
BP	GO:0075522	IRES-dependent viral translational initiation	1/451	10/10468	0.356342	0.954419	0.954419	EIF2D	1
BP	GO:0090050	positive regulation of cell migration involved in sprouting angiogenesis	1/451	10/10468	0.356342	0.954419	0.954419	VEGFA	1
BP	GO:0099174	regulation of presynapse organization	1/451	10/10468	0.356342	0.954419	0.954419	LRFN3	1
BP	GO:1900221	regulation of amyloid-beta clearance	1/451	10/10468	0.356342	0.954419	0.954419	LRPAP1	1
BP	GO:1901741	positive regulation of myoblast fusion	1/451	10/10468	0.356342	0.954419	0.954419	MAPK14	1
BP	GO:1902101	positive regulation of metaphase/anaphase transition of cell cycle	1/451	10/10468	0.356342	0.954419	0.954419	CDT1	1
BP	GO:1904706	negative regulation of vascular smooth muscle cell proliferation	1/451	10/10468	0.356342	0.954419	0.954419	TPM1	1
BP	GO:1990440	positive regulation of transcription from RNA polymerase II promoter in response to endoplasmic reticulum stress	1/451	10/10468	0.356342	0.954419	0.954419	CEBPB	1
BP	GO:2000353	positive regulation of endothelial cell apoptotic process	1/451	10/10468	0.356342	0.954419	0.954419	FOXO3	1
BP	GO:2001185	regulation of CD8-positive, alpha-beta T cell activation	1/451	10/10468	0.356342	0.954419	0.954419	RUNX1	1
BP	GO:0043470	regulation of carbohydrate catabolic process	4/451	70/10468	0.356342	0.954419	0.954419	ECD/NUP85/SEC13/PPP1R3B	4
BP	GO:0048592	eye morphogenesis	4/451	70/10468	0.356342	0.954419	0.954419	FJX1/GDF11/VEGFA/HIPK2	4
BP	GO:1904892	regulation of STAT cascade	4/451	70/10468	0.356342	0.954419	0.954419	PWP1/CRLF3/PARP14/HES1	4
BP	GO:0001954	positive regulation of cell-matrix adhesion	2/451	29/10468	0.357204	0.954419	0.954419	PPM1F/VEGFA	2
BP	GO:0002639	positive regulation of immunoglobulin production	2/451	29/10468	0.357204	0.954419	0.954419	EXOSC6/ATAD5	2
BP	GO:0002931	response to ischemia	2/451	29/10468	0.357204	0.954419	0.954419	EEF2/CPEB4	2
BP	GO:0006084	acetyl-CoA metabolic process	2/451	29/10468	0.357204	0.954419	0.954419	MPC2/ACAT1	2
BP	GO:0006891	intra-Golgi vesicle-mediated transport	2/451	29/10468	0.357204	0.954419	0.954419	GOSR1/NAPG	2
BP	GO:0007595	lactation	2/451	29/10468	0.357204	0.954419	0.954419	APRT/VEGFA	2
BP	GO:0014910	regulation of smooth muscle cell migration	2/451	29/10468	0.357204	0.954419	0.954419	TPM1/TRIB1	2
BP	GO:0031055	chromatin remodeling at centromere	2/451	29/10468	0.357204	0.954419	0.954419	OIP5/CENPC	2
BP	GO:0031343	positive regulation of cell killing	2/451	29/10468	0.357204	0.954419	0.954419	MICB/ULBP2	2
BP	GO:0035036	sperm-egg recognition	2/451	29/10468	0.357204	0.954419	0.954419	CATSPER2/PCSK4	2
BP	GO:0042307	positive regulation of protein import into nucleus	2/451	29/10468	0.357204	0.954419	0.954419	RBM22/MAPK14	2
BP	GO:0045740	positive regulation of DNA replication	2/451	29/10468	0.357204	0.954419	0.954419	CDT1/ATAD5	2
BP	GO:0048255	mRNA stabilization	2/451	29/10468	0.357204	0.954419	0.954419	ZFP36/MAPK14	2
BP	GO:0048538	thymus development	2/451	29/10468	0.357204	0.954419	0.954419	ATM/HES1	2
BP	GO:0048645	animal organ formation	2/451	29/10468	0.357204	0.954419	0.954419	HES1/CITED2	2
BP	GO:0072577	endothelial cell apoptotic process	2/451	29/10468	0.357204	0.954419	0.954419	PAK4/FOXO3	2
BP	GO:1901985	positive regulation of protein acetylation	2/451	29/10468	0.357204	0.954419	0.954419	BRD7/KAT7	2
BP	GO:1903955	positive regulation of protein targeting to mitochondrion	2/451	29/10468	0.357204	0.954419	0.954419	NPEPPS/SAE1	2
BP	GO:2001259	positive regulation of cation channel activity	2/451	29/10468	0.357204	0.954419	0.954419	RNF207/NOS1AP	2
BP	GO:0006888	ER to Golgi vesicle-mediated transport	9/451	178/10468	0.359838	0.954419	0.954419	TMED2/SEC23A/GOSR1/SPTBN4/SEC13/SEC24B/TMED7/TMED4/RNF139	9
BP	GO:0050900	leukocyte migration	10/451	200/10468	0.360543	0.954419	0.954419	NBL1/ARTN/CD58/NUP85/PIP5K1C/GYPA/AGER/MAPK14/VEGFA/DOK2	10
BP	GO:0006096	glycolytic process	5/451	92/10468	0.36381	0.954419	0.954419	HKDC1/ECD/ALDOC/NUP85/SEC13	5
BP	GO:0031929	TOR signaling	5/451	92/10468	0.36381	0.954419	0.954419	EIF4EBP2/ATM/RPTOR/SEC13/EPM2A	5
BP	GO:0048489	synaptic vesicle transport	5/451	92/10468	0.36381	0.954419	0.954419	VPS18/SNAP23/AP3S2/AP3D1/PIP5K1C	5
BP	GO:0097480	establishment of synaptic vesicle localization	5/451	92/10468	0.36381	0.954419	0.954419	VPS18/SNAP23/AP3S2/AP3D1/PIP5K1C	5
BP	GO:0045786	negative regulation of cell cycle	23/451	490/10468	0.365161	0.954419	0.954419	CLSPN/PLK3/ORC1/DTL/INTS7/ATM/RAD51/PKD1/NUBP1/BRD7/CDT1/CRLF3/PSMD3/CDC6/RPTOR/ARID3A/RHOB/ZFP36L2/PSME4/CLOCK/PSMB8/MAPK14/MYC	23
BP	GO:0002688	regulation of leukocyte chemotaxis	3/451	50/10468	0.365933	0.954419	0.954419	NBL1/MAPK14/VEGFA	3
BP	GO:0030071	regulation of mitotic metaphase/anaphase transition	3/451	50/10468	0.365933	0.954419	0.954419	ATM/CDT1/CDC6	3
BP	GO:0030901	midbrain development	3/451	50/10468	0.365933	0.954419	0.954419	YWHAE/EN1/HES1	3
BP	GO:1900407	regulation of cellular response to oxidative stress	3/451	50/10468	0.365933	0.954419	0.954419	SFPQ/MCL1/FOXO3	3
BP	GO:1901880	negative regulation of protein depolymerization	3/451	50/10468	0.365933	0.954419	0.954419	LMOD1/SPTBN4/CAPG	3
BP	GO:0022613	ribonucleoprotein complex biogenesis	20/451	423/10468	0.365961	0.954419	0.954419	MRTO4/RPL11/AGO1/NSUN4/RPS27/GLUL/EIF2D/ATM/PWP1/SART3/EXOSC6/SNRPG/USP39/AAMP/SDAD1/SMN1/SMN2/POP7/EXOSC2/GEMIN8	20
BP	GO:0002761	regulation of myeloid leukocyte differentiation	4/451	71/10468	0.366241	0.954419	0.954419	CEBPB/RUNX1/TRIB1/MYC	4
BP	GO:0014066	regulation of phosphatidylinositol 3-kinase signaling	4/451	71/10468	0.366241	0.954419	0.954419	UNC5B/PIP5K1C/EPOR/PLXNB1	4
BP	GO:0097327	response to antineoplastic agent	4/451	71/10468	0.366241	0.954419	0.954419	RAD51/KAT7/MAPK13/FOXO3	4
BP	GO:0071347	cellular response to interleukin-1	6/451	114/10468	0.368016	0.954419	0.954419	PSMD3/PSME4/CEBPB/HYAL1/PSMB8/MAPK13	6
BP	GO:0043406	positive regulation of MAP kinase activity	8/451	158/10468	0.371649	0.954419	0.954419	AJUBA/MAP4K5/TNIK/FGF18/AGER/MAPK14/VEGFA/GADD45G	8
BP	GO:0006757	ATP generation from ADP	5/451	93/10468	0.372453	0.954419	0.954419	HKDC1/ECD/ALDOC/NUP85/SEC13	5
BP	GO:0010508	positive regulation of autophagy	5/451	93/10468	0.372453	0.954419	0.954419	PLK3/CDC37/SUPT5H/FOXO3/EPM2A	5
BP	GO:0031124	mRNA 3'-end processing	5/451	93/10468	0.372453	0.954419	0.954419	SRRM1/AHCYL1/ZC3H14/SUPT5H/POLDIP3	5
BP	GO:0042866	pyruvate biosynthetic process	5/451	93/10468	0.372453	0.954419	0.954419	HKDC1/ECD/ALDOC/NUP85/SEC13	5
BP	GO:0002066	columnar/cuboidal epithelial cell development	2/451	30/10468	0.372915	0.954419	0.954419	CLOCK/SEC24B	2
BP	GO:0006576	cellular biogenic amine metabolic process	2/451	30/10468	0.372915	0.954419	0.954419	SRM/ODC1	2
BP	GO:0016266	O-glycan processing	2/451	30/10468	0.372915	0.954419	0.954419	GALNT5/XXYLT1	2
BP	GO:0019692	deoxyribose phosphate metabolic process	2/451	30/10468	0.372915	0.954419	0.954419	UNG/NEIL1	2
BP	GO:0021872	forebrain generation of neurons	2/451	30/10468	0.372915	0.954419	0.954419	DLX1/HES1	2
BP	GO:0032008	positive regulation of TOR signaling	2/451	30/10468	0.372915	0.954419	0.954419	RPTOR/SEC13	2
BP	GO:0035082	axoneme assembly	2/451	30/10468	0.372915	0.954419	0.954419	TEKT2/TTC26	2
BP	GO:0035329	hippo signaling	2/451	30/10468	0.372915	0.954419	0.954419	AJUBA/YWHAE	2
BP	GO:0050999	regulation of nitric-oxide synthase activity	2/451	30/10468	0.372915	0.954419	0.954419	NOS1AP/SPR	2
BP	GO:0051496	positive regulation of stress fiber assembly	2/451	30/10468	0.372915	0.954419	0.954419	TPM1/PPM1F	2
BP	GO:0060038	cardiac muscle cell proliferation	2/451	30/10468	0.372915	0.954419	0.954419	MAPK14/ZFPM2	2
BP	GO:0061028	establishment of endothelial barrier	2/451	30/10468	0.372915	0.954419	0.954419	VEGFA/RAP2C	2
BP	GO:1904591	positive regulation of protein import	2/451	30/10468	0.372915	0.954419	0.954419	RBM22/MAPK14	2
BP	GO:0000184	nuclear-transcribed mRNA catabolic process, nonsense-mediated decay	6/451	115/10468	0.375782	0.954419	0.954419	RPL22/RPL11/RPS27/RPL41/RPS29/SMG1	6
BP	GO:0045995	regulation of embryonic development	4/451	72/10468	0.376132	0.954419	0.954419	RNF207/GPR161/HES1/SEC24B	4
BP	GO:0048194	Golgi vesicle budding	4/451	72/10468	0.376132	0.954419	0.954419	TMED2/SEC23A/SEC13/SEC24B	4
BP	GO:0016569	covalent chromatin modification	18/451	381/10468	0.37742	0.954419	0.954419	MTHFR/SFPQ/ARID4B/ATM/KANSL2/PWP1/SART3/SETD1A/BRD7/ATXN7L3/KAT7/PPM1F/ATXN7/CLOCK/C6orf89/VEGFA/MYB/PHF19	18
BP	GO:0000723	telomere maintenance	7/451	137/10468	0.377505	0.954419	0.954419	FEN1/ATM/RAD51/SMG1/PRIM2/MYC/RECQL4	7
BP	GO:0007281	germ cell development	7/451	137/10468	0.377505	0.954419	0.954419	ATM/CATSPER2/PCSK4/PSME4/ACVR1/FOXO3/TTC26	7
BP	GO:0048193	Golgi vesicle transport	15/451	314/10468	0.377723	0.954419	0.954419	SORT1/ARL1/TMED2/SEC23A/SNAP23/LLGL1/GOSR1/NAPG/AP3D1/SPTBN4/SEC13/SEC24B/TMED7/TMED4/RNF139	15
BP	GO:0002028	regulation of sodium ion transport	3/451	51/10468	0.377795	0.954419	0.954419	AHCYL1/SPTBN4/GLRX	3
BP	GO:0006977	DNA damage response, signal transduction by p53 class mediator resulting in cell cycle arrest	3/451	51/10468	0.377795	0.954419	0.954419	PLK3/ATM/ARID3A	3
BP	GO:0032414	positive regulation of ion transmembrane transporter activity	3/451	51/10468	0.377795	0.954419	0.954419	RNF207/NOS1AP/GLRX	3
BP	GO:0045582	positive regulation of T cell differentiation	3/451	51/10468	0.377795	0.954419	0.954419	AP3D1/RUNX1/MYB	3
BP	GO:0050772	positive regulation of axonogenesis	3/451	51/10468	0.377795	0.954419	0.954419	TRAK1/PLXNB1/VEGFA	3
BP	GO:0061053	somite development	3/451	51/10468	0.377795	0.954419	0.954419	ATM/TMED2/TBX6	3
BP	GO:1902099	regulation of metaphase/anaphase transition of cell cycle	3/451	51/10468	0.377795	0.954419	0.954419	ATM/CDT1/CDC6	3
BP	GO:0010594	regulation of endothelial cell migration	5/451	94/10468	0.381095	0.954419	0.954419	GLUL/RHOB/AAMP/FGF18/VEGFA	5
BP	GO:0018022	peptidyl-lysine methylation	5/451	94/10468	0.381095	0.954419	0.954419	ARID4B/PWP1/SETD1A/MYB/PHF19	5
BP	GO:0072331	signal transduction by p53 class mediator	11/451	226/10468	0.3829	0.954419	0.954419	RPL11/PLK3/ATM/BRD7/ATAD5/TAF15/ARID3A/HINT1/MAPK14/FOXO3/HIPK2	11
BP	GO:0001516	prostaglandin biosynthetic process	1/451	11/10468	0.384099	0.954419	0.954419	TBXAS1	1
BP	GO:0002068	glandular epithelial cell development	1/451	11/10468	0.384099	0.954419	0.954419	CLOCK	1
BP	GO:0002089	lens morphogenesis in camera-type eye	1/451	11/10468	0.384099	0.954419	0.954419	HIPK2	1
BP	GO:0003159	morphogenesis of an endothelium	1/451	11/10468	0.384099	0.954419	0.954419	RHOB	1
BP	GO:0003309	type B pancreatic cell differentiation	1/451	11/10468	0.384099	0.954419	0.954419	CLOCK	1
BP	GO:0006000	fructose metabolic process	1/451	11/10468	0.384099	0.954419	0.954419	ALDOC	1
BP	GO:0006054	N-acetylneuraminate metabolic process	1/451	11/10468	0.384099	0.954419	0.954419	NPL	1
BP	GO:0006491	N-glycan processing	1/451	11/10468	0.384099	0.954419	0.954419	MAN1A1	1
BP	GO:0007202	activation of phospholipase C activity	1/451	11/10468	0.384099	0.954419	0.954419	GNAQ	1
BP	GO:0007289	spermatid nucleus differentiation	1/451	11/10468	0.384099	0.954419	0.954419	PSME4	1
BP	GO:0007617	mating behavior	1/451	11/10468	0.384099	0.954419	0.954419	UBE2Q1	1
BP	GO:0009113	purine nucleobase biosynthetic process	1/451	11/10468	0.384099	0.954419	0.954419	APRT	1
BP	GO:0030214	hyaluronan catabolic process	1/451	11/10468	0.384099	0.954419	0.954419	HYAL1	1
BP	GO:0031281	positive regulation of cyclase activity	1/451	11/10468	0.384099	0.954419	0.954419	MAPK14	1
BP	GO:0032753	positive regulation of interleukin-4 production	1/451	11/10468	0.384099	0.954419	0.954419	CEBPB	1
BP	GO:0033127	regulation of histone phosphorylation	1/451	11/10468	0.384099	0.954419	0.954419	ATM	1
BP	GO:0034694	response to prostaglandin	1/451	11/10468	0.384099	0.954419	0.954419	GNRH1	1
BP	GO:0034982	mitochondrial protein processing	1/451	11/10468	0.384099	0.954419	0.954419	IMMP2L	1
BP	GO:0036037	CD8-positive, alpha-beta T cell activation	1/451	11/10468	0.384099	0.954419	0.954419	RUNX1	1
BP	GO:0042104	positive regulation of activated T cell proliferation	1/451	11/10468	0.384099	0.954419	0.954419	AGER	1
BP	GO:0042532	negative regulation of tyrosine phosphorylation of STAT protein	1/451	11/10468	0.384099	0.954419	0.954419	PARP14	1
BP	GO:0042537	benzene-containing compound metabolic process	1/451	11/10468	0.384099	0.954419	0.954419	GSTM3	1
BP	GO:0042573	retinoic acid metabolic process	1/451	11/10468	0.384099	0.954419	0.954419	CYP2S1	1
BP	GO:0043173	nucleotide salvage	1/451	11/10468	0.384099	0.954419	0.954419	APRT	1
BP	GO:0045838	positive regulation of membrane potential	1/451	11/10468	0.384099	0.954419	0.954419	GLRX	1
BP	GO:0046457	prostanoid biosynthetic process	1/451	11/10468	0.384099	0.954419	0.954419	TBXAS1	1
BP	GO:0046501	protoporphyrinogen IX metabolic process	1/451	11/10468	0.384099	0.954419	0.954419	UROD	1
BP	GO:0048799	animal organ maturation	1/451	11/10468	0.384099	0.954419	0.954419	PLXNB1	1
BP	GO:0051004	regulation of lipoprotein lipase activity	1/451	11/10468	0.384099	0.954419	0.954419	SORT1	1
BP	GO:0051349	positive regulation of lyase activity	1/451	11/10468	0.384099	0.954419	0.954419	ISCU	1
BP	GO:0061154	endothelial tube morphogenesis	1/451	11/10468	0.384099	0.954419	0.954419	RHOB	1
BP	GO:0061437	renal system vasculature development	1/451	11/10468	0.384099	0.954419	0.954419	HES1	1
BP	GO:0061440	kidney vasculature development	1/451	11/10468	0.384099	0.954419	0.954419	HES1	1
BP	GO:0071636	positive regulation of transforming growth factor beta production	1/451	11/10468	0.384099	0.954419	0.954419	MYB	1
BP	GO:0072012	glomerulus vasculature development	1/451	11/10468	0.384099	0.954419	0.954419	HES1	1
BP	GO:0072393	microtubule anchoring at microtubule organizing center	1/451	11/10468	0.384099	0.954419	0.954419	PCM1	1
BP	GO:0090085	regulation of protein deubiquitination	1/451	11/10468	0.384099	0.954419	0.954419	SART3	1
BP	GO:0095500	acetylcholine receptor signaling pathway	1/451	11/10468	0.384099	0.954419	0.954419	GNAQ	1
BP	GO:0097201	negative regulation of transcription from RNA polymerase II promoter in response to stress	1/451	11/10468	0.384099	0.954419	0.954419	CITED2	1
BP	GO:0097329	response to antimetabolite	1/451	11/10468	0.384099	0.954419	0.954419	KAT7	1
BP	GO:0097503	sialylation	1/451	11/10468	0.384099	0.954419	0.954419	ST6GALNAC1	1
BP	GO:0099640	axo-dendritic protein transport	1/451	11/10468	0.384099	0.954419	0.954419	SFPQ	1
BP	GO:0150077	regulation of neuroinflammatory response	1/451	11/10468	0.384099	0.954419	0.954419	ATM	1
BP	GO:1900037	regulation of cellular response to hypoxia	1/451	11/10468	0.384099	0.954419	0.954419	AJUBA	1
BP	GO:1901739	regulation of myoblast fusion	1/451	11/10468	0.384099	0.954419	0.954419	MAPK14	1
BP	GO:1902074	response to salt	1/451	11/10468	0.384099	0.954419	0.954419	MAPK13	1
BP	GO:1902166	negative regulation of intrinsic apoptotic signaling pathway in response to DNA damage by p53 class mediator	1/451	11/10468	0.384099	0.954419	0.954419	ATAD5	1
BP	GO:1903350	response to dopamine	1/451	11/10468	0.384099	0.954419	0.954419	SULT1A3	1
BP	GO:1903351	cellular response to dopamine	1/451	11/10468	0.384099	0.954419	0.954419	SULT1A3	1
BP	GO:1903624	regulation of DNA catabolic process	1/451	11/10468	0.384099	0.954419	0.954419	ATM	1
BP	GO:1903831	signal transduction involved in cellular response to ammonium ion	1/451	11/10468	0.384099	0.954419	0.954419	GNAQ	1
BP	GO:1904263	positive regulation of TORC1 signaling	1/451	11/10468	0.384099	0.954419	0.954419	SEC13	1
BP	GO:1904738	vascular associated smooth muscle cell migration	1/451	11/10468	0.384099	0.954419	0.954419	TPM1	1
BP	GO:1904752	regulation of vascular associated smooth muscle cell migration	1/451	11/10468	0.384099	0.954419	0.954419	TPM1	1
BP	GO:1904925	positive regulation of autophagy of mitochondrion in response to mitochondrial depolarization	1/451	11/10468	0.384099	0.954419	0.954419	CDC37	1
BP	GO:1905276	regulation of epithelial tube formation	1/451	11/10468	0.384099	0.954419	0.954419	SEC24B	1
BP	GO:1905523	positive regulation of macrophage migration	1/451	11/10468	0.384099	0.954419	0.954419	MAPK14	1
BP	GO:1905820	positive regulation of chromosome separation	1/451	11/10468	0.384099	0.954419	0.954419	CDT1	1
BP	GO:2000105	positive regulation of DNA-dependent DNA replication	1/451	11/10468	0.384099	0.954419	0.954419	CDT1	1
BP	GO:2000136	regulation of cell proliferation involved in heart morphogenesis	1/451	11/10468	0.384099	0.954419	0.954419	HES1	1
BP	GO:2000482	regulation of interleukin-8 secretion	1/451	11/10468	0.384099	0.954419	0.954419	CD58	1
BP	GO:0010721	negative regulation of cell development	9/451	182/10468	0.38453	0.954419	0.954419	GDF11/TBX6/DLX1/HES1/MYLIP/VEGFA/FOXO3/PCM1/GNRH1	9
BP	GO:0033673	negative regulation of kinase activity	9/451	182/10468	0.38453	0.954419	0.954419	AJUBA/RPTOR/MIDN/TRIB2/PPM1F/PRKAR2A/PRKRIP1/TRIB1/GNAQ	9
BP	GO:0000070	mitotic sister chromatid segregation	7/451	138/10468	0.384622	0.954419	0.954419	MSTO1/ATM/NUSAP1/CDT1/CDC6/CENPC/BOD1	7
BP	GO:0009451	RNA modification	7/451	138/10468	0.384622	0.954419	0.954419	NSUN4/ELP6/TRMT10A/THG1L/CDKAL1/METTL2B/TRUB2	7
BP	GO:0032200	telomere organization	7/451	138/10468	0.384622	0.954419	0.954419	FEN1/ATM/RAD51/SMG1/PRIM2/MYC/RECQL4	7
BP	GO:0006733	oxidoreduction coenzyme metabolic process	8/451	160/10468	0.384849	0.954419	0.954419	MPC2/HKDC1/ECD/ALDOC/NUP85/SEC13/COQ2/COQ4	8
BP	GO:0050768	negative regulation of neurogenesis	8/451	160/10468	0.384849	0.954419	0.954419	GDF11/TBX6/DLX1/HES1/MYLIP/FOXO3/PCM1/GNRH1	8
BP	GO:0006027	glycosaminoglycan catabolic process	2/451	31/10468	0.388468	0.954419	0.954419	GPC6/HYAL1	2
BP	GO:0006099	tricarboxylic acid cycle	2/451	31/10468	0.388468	0.954419	0.954419	SDHC/SDHD	2
BP	GO:0006778	porphyrin-containing compound metabolic process	2/451	31/10468	0.388468	0.954419	0.954419	UROD/BLVRB	2
BP	GO:0009994	oocyte differentiation	2/451	31/10468	0.388468	0.954419	0.954419	ATM/FOXO3	2
BP	GO:0032663	regulation of interleukin-2 production	2/451	31/10468	0.388468	0.954419	0.954419	ZFP36/RUNX1	2
BP	GO:0032801	receptor catabolic process	2/451	31/10468	0.388468	0.954419	0.954419	AP2S1/MYLIP	2
BP	GO:0045669	positive regulation of osteoblast differentiation	2/451	31/10468	0.388468	0.954419	0.954419	ACVR1/CEBPB	2
BP	GO:0051567	histone H3-K9 methylation	2/451	31/10468	0.388468	0.954419	0.954419	ARID4B/MYB	2
BP	GO:0046394	carboxylic acid biosynthetic process	14/451	294/10468	0.388913	0.954419	0.954419	ACOT7/MTHFR/GLUL/PYCR2/HKDC1/ECD/ACSM3/ALDOC/NUP85/GAD1/SEC13/SCAP/HYAL1/TBXAS1	14
BP	GO:0000381	regulation of alternative mRNA splicing, via spliceosome	3/451	52/10468	0.389609	0.954419	0.954419	ZC3H10/SART3/NSRP1	3
BP	GO:0036465	synaptic vesicle recycling	3/451	52/10468	0.389609	0.954419	0.954419	AP3D1/PIP5K1C/POTEKP	3
BP	GO:0070252	actin-mediated cell contraction	3/451	52/10468	0.389609	0.954419	0.954419	RNF207/NOS1AP/TPM1	3
BP	GO:0072431	signal transduction involved in mitotic G1 DNA damage checkpoint	3/451	52/10468	0.389609	0.954419	0.954419	PLK3/ATM/ARID3A	3
BP	GO:1902400	intracellular signal transduction involved in G1 DNA damage checkpoint	3/451	52/10468	0.389609	0.954419	0.954419	PLK3/ATM/ARID3A	3
BP	GO:1903749	positive regulation of establishment of protein localization to mitochondrion	3/451	52/10468	0.389609	0.954419	0.954419	YWHAE/NPEPPS/SAE1	3
BP	GO:0006839	mitochondrial transport	10/451	205/10468	0.38969	0.954419	0.954419	MPC2/TOMM20/TIMM8B/SPG7/YWHAE/NPEPPS/TIMM44/SAE1/CHCHD4/IMMP2L	10
BP	GO:1902107	positive regulation of leukocyte differentiation	5/451	95/10468	0.389733	0.954419	0.954419	AP3D1/RUNX1/AGER/MYB/TRIB1	5
BP	GO:0072521	purine-containing compound metabolic process	20/451	429/10468	0.390221	0.954419	0.954419	ACOT7/AHCYL1/SDHC/MPC2/HKDC1/ECD/ACAT1/SDHD/ISCU/HDDC3/ACSM3/SULT1A3/SULT1A4/APRT/ALDOC/NUP85/NDUFB7/SEC13/HINT1/AHCYL2	20
BP	GO:0019932	second-messenger-mediated signaling	9/451	183/10468	0.390723	0.954419	0.954419	PTGER3/NOS1AP/GPR161/EIF4EBP2/SULT1A3/PRKAR2A/HINT1/VEGFA/GNAQ	9
BP	GO:0071426	ribonucleoprotein complex export from nucleus	6/451	117/10468	0.391324	0.954419	0.954419	SRRM1/SMG1/NUP85/POLDIP3/SEC13/SDAD1	6
BP	GO:0000302	response to reactive oxygen species	8/451	161/10468	0.391457	0.954419	0.954419	PLK3/TPM1/EEF2/RHOB/HYAL1/MAPK13/FOXO3/MYB	8
BP	GO:0009266	response to temperature stimulus	8/451	161/10468	0.391457	0.954419	0.954419	CLPB/ATM/YWHAE/NUP85/RPTOR/SEC13/HSPA9/MICB	8
BP	GO:0007611	learning or memory	7/451	139/10468	0.391742	0.954419	0.954419	EIF4EBP2/FEN1/MEIS2/EN1/CEBPB/AGER/VDAC3	7
BP	GO:0051222	positive regulation of protein transport	12/451	250/10468	0.392373	0.954419	0.954419	PLK3/CD58/MPC2/GLUL/C2CD2L/YWHAE/NPEPPS/SAE1/RBM22/AGER/MAPK14/PCM1	12
BP	GO:0016053	organic acid biosynthetic process	14/451	295/10468	0.393803	0.954419	0.954419	ACOT7/MTHFR/GLUL/PYCR2/HKDC1/ECD/ACSM3/ALDOC/NUP85/GAD1/SEC13/SCAP/HYAL1/TBXAS1	14
BP	GO:0007286	spermatid development	4/451	74/10468	0.395867	0.954419	0.954419	CATSPER2/PCSK4/PSME4/TTC26	4
BP	GO:0032635	interleukin-6 production	4/451	74/10468	0.395867	0.954419	0.954419	CEBPB/TBC1D23/AGER/MAPK13	4
BP	GO:0046916	cellular transition metal ion homeostasis	4/451	74/10468	0.395867	0.954419	0.954419	ISCU/NUBP1/AP3D1/MYC	4
BP	GO:1990542	mitochondrial transmembrane transport	4/451	74/10468	0.395867	0.954419	0.954419	MPC2/TOMM20/TIMM44/CHCHD4	4
BP	GO:2000060	positive regulation of ubiquitin-dependent protein catabolic process	4/451	74/10468	0.395867	0.954419	0.954419	PLK3/TRIB2/RNF139/TRIB1	4
BP	GO:0042180	cellular ketone metabolic process	8/451	162/10468	0.39807	0.954419	0.954419	CYP17A1/PSMD3/ODC1/PSME4/SCAP/COQ2/PSMB8/COQ4	8
BP	GO:0045732	positive regulation of protein catabolic process	8/451	162/10468	0.39807	0.954419	0.954419	PLK3/DTL/SMURF2/TRIB2/TIPARP/MYLIP/RNF139/TRIB1	8
BP	GO:0022904	respiratory electron transport chain	5/451	96/10468	0.398364	0.954419	0.954419	SDHC/SDHD/ISCU/NDUFB7/IMMP2L	5
BP	GO:0035264	multicellular organism growth	5/451	96/10468	0.398364	0.954419	0.954419	ATM/TMED2/RAI1/SPTBN4/EN1	5
BP	GO:0009150	purine ribonucleotide metabolic process	18/451	386/10468	0.398846	0.954419	0.954419	ACOT7/SDHC/MPC2/HKDC1/ECD/ACAT1/SDHD/ISCU/HDDC3/ACSM3/SULT1A3/SULT1A4/APRT/ALDOC/NUP85/NDUFB7/SEC13/HINT1	18
BP	GO:0006338	chromatin remodeling	7/451	140/10468	0.398864	0.954419	0.954419	SMARCC2/OIP5/BPTF/PSME4/CENPC/MYB/MYC	7
BP	GO:0050821	protein stabilization	7/451	140/10468	0.398864	0.954419	0.954419	RPL11/IFT46/NAPG/NCLN/CDC37/CAMLG/GNAQ	7
BP	GO:0071166	ribonucleoprotein complex localization	6/451	118/10468	0.399093	0.954419	0.954419	SRRM1/SMG1/NUP85/POLDIP3/SEC13/SDAD1	6
BP	GO:0071229	cellular response to acid chemical	6/451	118/10468	0.399093	0.954419	0.954419	ATM/RPTOR/CEBPB/CPEB4/VEGFA/MYB	6
BP	GO:0001909	leukocyte mediated cytotoxicity	3/451	53/10468	0.401368	0.954419	0.954419	AGER/MICB/ULBP2	3
BP	GO:0007091	metaphase/anaphase transition of mitotic cell cycle	3/451	53/10468	0.401368	0.954419	0.954419	ATM/CDT1/CDC6	3
BP	GO:0031060	regulation of histone methylation	3/451	53/10468	0.401368	0.954419	0.954419	MTHFR/MYB/PHF19	3
BP	GO:0035282	segmentation	3/451	53/10468	0.401368	0.954419	0.954419	ATM/TMED2/TBX6	3
BP	GO:0046824	positive regulation of nucleocytoplasmic transport	3/451	53/10468	0.401368	0.954419	0.954419	YWHAE/RBM22/MAPK14	3
BP	GO:0048144	fibroblast proliferation	3/451	53/10468	0.401368	0.954419	0.954419	CDC6/MYB/MYC	3
BP	GO:0048145	regulation of fibroblast proliferation	3/451	53/10468	0.401368	0.954419	0.954419	CDC6/MYB/MYC	3
BP	GO:0051310	metaphase plate congression	3/451	53/10468	0.401368	0.954419	0.954419	CDT1/CENPC/BOD1	3
BP	GO:0060021	roof of mouth development	3/451	53/10468	0.401368	0.954419	0.954419	DHRS3/GDF11/TIPARP	3
BP	GO:0065002	intracellular protein transmembrane transport	3/451	53/10468	0.401368	0.954419	0.954419	TOMM20/TIMM44/CHCHD4	3
BP	GO:0072413	signal transduction involved in mitotic cell cycle checkpoint	3/451	53/10468	0.401368	0.954419	0.954419	PLK3/ATM/ARID3A	3
BP	GO:1902402	signal transduction involved in mitotic DNA damage checkpoint	3/451	53/10468	0.401368	0.954419	0.954419	PLK3/ATM/ARID3A	3
BP	GO:1902403	signal transduction involved in mitotic DNA integrity checkpoint	3/451	53/10468	0.401368	0.954419	0.954419	PLK3/ATM/ARID3A	3
BP	GO:0042176	regulation of protein catabolic process	14/451	297/10468	0.403598	0.954419	0.954419	RPL11/PLK3/DTL/PKD1/PSMD3/SMURF2/ODC1/TRIB2/TIPARP/CAMLG/MYLIP/HIPK2/RNF139/TRIB1	14
BP	GO:0003229	ventricular cardiac muscle tissue development	2/451	32/10468	0.403848	0.954419	0.954419	TPM1/ZFPM2	2
BP	GO:0006101	citrate metabolic process	2/451	32/10468	0.403848	0.954419	0.954419	SDHC/SDHD	2
BP	GO:0006409	tRNA export from nucleus	2/451	32/10468	0.403848	0.954419	0.954419	NUP85/SEC13	2
BP	GO:0009262	deoxyribonucleotide metabolic process	2/451	32/10468	0.403848	0.954419	0.954419	UNG/NEIL1	2
BP	GO:0010718	positive regulation of epithelial to mesenchymal transition	2/451	32/10468	0.403848	0.954419	0.954419	BAMBI/ACVR1	2
BP	GO:0031062	positive regulation of histone methylation	2/451	32/10468	0.403848	0.954419	0.954419	MYB/PHF19	2
BP	GO:0031952	regulation of protein autophosphorylation	2/451	32/10468	0.403848	0.954419	0.954419	VEGFA/RAP2C	2
BP	GO:0032435	negative regulation of proteasomal ubiquitin-dependent protein catabolic process	2/451	32/10468	0.403848	0.954419	0.954419	RPL11/CAMLG	2
BP	GO:0032655	regulation of interleukin-12 production	2/451	32/10468	0.403848	0.954419	0.954419	AGER/MAPK14	2
BP	GO:0043370	regulation of CD4-positive, alpha-beta T cell differentiation	2/451	32/10468	0.403848	0.954419	0.954419	RUNX1/MYB	2
BP	GO:0043928	exonucleolytic nuclear-transcribed mRNA catabolic process involved in deadenylation-dependent decay	2/451	32/10468	0.403848	0.954419	0.954419	EXOSC6/EXOSC2	2
BP	GO:0045143	homologous chromosome segregation	2/451	32/10468	0.403848	0.954419	0.954419	ATM/CENPC	2
BP	GO:0060236	regulation of mitotic spindle organization	2/451	32/10468	0.403848	0.954419	0.954419	PKD1/STAG1	2
BP	GO:0071364	cellular response to epidermal growth factor stimulus	2/451	32/10468	0.403848	0.954419	0.954419	ZFP36/ZFP36L2	2
BP	GO:0071431	tRNA-containing ribonucleoprotein complex export from nucleus	2/451	32/10468	0.403848	0.954419	0.954419	NUP85/SEC13	2
BP	GO:0043414	macromolecule methylation	11/451	230/10468	0.405139	0.954419	0.954419	MTHFR/NSUN4/ARID4B/PWP1/SETD1A/FBXO11/TRMT10A/MYB/METTL2B/MYC/PHF19	11
BP	GO:0008593	regulation of Notch signaling pathway	4/451	75/10468	0.405699	0.954419	0.954419	MAML2/LLGL1/DLX1/HES1	4
BP	GO:0035305	negative regulation of dephosphorylation	4/451	75/10468	0.405699	0.954419	0.954419	SPOCD1/ENSA/YWHAE/BOD1	4
BP	GO:0001501	skeletal system development	13/451	275/10468	0.405941	0.954419	0.954419	DHRS3/HSD17B7/GDF11/CHSY1/PKD1/RAI1/EN1/DLX1/PLXNB1/HYAL1/TIPARP/FGF18/MAPK14	13
BP	GO:0001701	in utero embryonic development	13/451	275/10468	0.405941	0.954419	0.954419	NPAT/TMED2/TPM1/PKD1/BPTF/ASF1B/SF3B6/HS6ST1/ACVR1/CEBPB/HES1/VEGFA/ZFPM2	13
BP	GO:0006090	pyruvate metabolic process	6/451	119/10468	0.406857	0.954419	0.954419	MPC2/HKDC1/ECD/ALDOC/NUP85/SEC13	6
BP	GO:0030833	regulation of actin filament polymerization	6/451	119/10468	0.406857	0.954419	0.954419	LMOD1/ARPC3/COTL1/PLEKHG2/SPTBN4/CAPG	6
BP	GO:0007626	locomotory behavior	5/451	97/10468	0.406982	0.954419	0.954419	OLFM2/SPTBN4/EN1/GAD1/HIPK2	5
BP	GO:0097479	synaptic vesicle localization	5/451	97/10468	0.406982	0.954419	0.954419	VPS18/SNAP23/AP3S2/AP3D1/PIP5K1C	5
BP	GO:0050673	epithelial cell proliferation	10/451	208/10468	0.407257	0.954419	0.954419	RPS6KA1/GLUL/RPTOR/ZFP36/CEBPB/HYAL1/HES1/C6orf89/VEGFA/MYC	10
BP	GO:0000054	ribosomal subunit export from nucleus	1/451	12/10468	0.410662	0.954419	0.954419	SDAD1	1
BP	GO:0000097	sulfur amino acid biosynthetic process	1/451	12/10468	0.410662	0.954419	0.954419	MTHFR	1
BP	GO:0000244	spliceosomal tri-snRNP complex assembly	1/451	12/10468	0.410662	0.954419	0.954419	SART3	1
BP	GO:0001958	endochondral ossification	1/451	12/10468	0.410662	0.954419	0.954419	FGF18	1
BP	GO:0003148	outflow tract septum morphogenesis	1/451	12/10468	0.410662	0.954419	0.954419	ZFPM2	1
BP	GO:0003198	epithelial to mesenchymal transition involved in endocardial cushion formation	1/451	12/10468	0.410662	0.954419	0.954419	ACVR1	1
BP	GO:0003209	cardiac atrium morphogenesis	1/451	12/10468	0.410662	0.954419	0.954419	ACVR1	1
BP	GO:0006071	glycerol metabolic process	1/451	12/10468	0.410662	0.954419	0.954419	COQ2	1
BP	GO:0006706	steroid catabolic process	1/451	12/10468	0.410662	0.954419	0.954419	HSD17B6	1
BP	GO:0008340	determination of adult lifespan	1/451	12/10468	0.410662	0.954419	0.954419	ATM	1
BP	GO:0010224	response to UV-B	1/451	12/10468	0.410662	0.954419	0.954419	HYAL1	1
BP	GO:0010560	positive regulation of glycoprotein biosynthetic process	1/451	12/10468	0.410662	0.954419	0.954419	PXYLP1	1
BP	GO:0010758	regulation of macrophage chemotaxis	1/451	12/10468	0.410662	0.954419	0.954419	MAPK14	1
BP	GO:0010826	negative regulation of centrosome duplication	1/451	12/10468	0.410662	0.954419	0.954419	NUBP1	1
BP	GO:0014850	response to muscle activity	1/451	12/10468	0.410662	0.954419	0.954419	TOMM20	1
BP	GO:0016486	peptide hormone processing	1/451	12/10468	0.410662	0.954419	0.954419	PCSK4	1
BP	GO:0018149	peptide cross-linking	1/451	12/10468	0.410662	0.954419	0.954419	EGFLAM	1
BP	GO:0018216	peptidyl-arginine methylation	1/451	12/10468	0.410662	0.954419	0.954419	FBXO11	1
BP	GO:0021544	subpallium development	1/451	12/10468	0.410662	0.954419	0.954419	DLX1	1
BP	GO:0030206	chondroitin sulfate biosynthetic process	1/451	12/10468	0.410662	0.954419	0.954419	CHSY1	1
BP	GO:0031054	pre-miRNA processing	1/451	12/10468	0.410662	0.954419	0.954419	AGO1	1
BP	GO:0032486	Rap protein signal transduction	1/451	12/10468	0.410662	0.954419	0.954419	RAP2C	1
BP	GO:0032656	regulation of interleukin-13 production	1/451	12/10468	0.410662	0.954419	0.954419	TNFRSF21	1
BP	GO:0032793	positive regulation of CREB transcription factor activity	1/451	12/10468	0.410662	0.954419	0.954419	VEGFA	1
BP	GO:0032959	inositol trisphosphate biosynthetic process	1/451	12/10468	0.410662	0.954419	0.954419	PLCL1	1
BP	GO:0033151	V(D)J recombination	1/451	12/10468	0.410662	0.954419	0.954419	ATM	1
BP	GO:0033687	osteoblast proliferation	1/451	12/10468	0.410662	0.954419	0.954419	PLXNB1	1
BP	GO:0033750	ribosome localization	1/451	12/10468	0.410662	0.954419	0.954419	SDAD1	1
BP	GO:0034349	glial cell apoptotic process	1/451	12/10468	0.410662	0.954419	0.954419	TNFRSF21	1
BP	GO:0034975	protein folding in endoplasmic reticulum	1/451	12/10468	0.410662	0.954419	0.954419	EMC1	1
BP	GO:0035269	protein O-linked mannosylation	1/451	12/10468	0.410662	0.954419	0.954419	SDF2L1	1
BP	GO:0035563	positive regulation of chromatin binding	1/451	12/10468	0.410662	0.954419	0.954419	CDT1	1
BP	GO:0036075	replacement ossification	1/451	12/10468	0.410662	0.954419	0.954419	FGF18	1
BP	GO:0036092	phosphatidylinositol-3-phosphate biosynthetic process	1/451	12/10468	0.410662	0.954419	0.954419	ATM	1
BP	GO:0042535	positive regulation of tumor necrosis factor biosynthetic process	1/451	12/10468	0.410662	0.954419	0.954419	AGER	1
BP	GO:0043174	nucleoside salvage	1/451	12/10468	0.410662	0.954419	0.954419	APRT	1
BP	GO:0043248	proteasome assembly	1/451	12/10468	0.410662	0.954419	0.954419	PSMG1	1
BP	GO:0043517	positive regulation of DNA damage response, signal transduction by p53 class mediator	1/451	12/10468	0.410662	0.954419	0.954419	ATM	1
BP	GO:0045117	azole transport	1/451	12/10468	0.410662	0.954419	0.954419	SNAP23	1
BP	GO:0045822	negative regulation of heart contraction	1/451	12/10468	0.410662	0.954419	0.954419	SPTBN4	1
BP	GO:0048143	astrocyte activation	1/451	12/10468	0.410662	0.954419	0.954419	AGER	1
BP	GO:0051930	regulation of sensory perception of pain	1/451	12/10468	0.410662	0.954419	0.954419	ZFHX2	1
BP	GO:0060009	Sertoli cell development	1/451	12/10468	0.410662	0.954419	0.954419	ARID4B	1
BP	GO:0060211	regulation of nuclear-transcribed mRNA poly(A) tail shortening	1/451	12/10468	0.410662	0.954419	0.954419	ZFP36	1
BP	GO:0060213	positive regulation of nuclear-transcribed mRNA poly(A) tail shortening	1/451	12/10468	0.410662	0.954419	0.954419	ZFP36	1
BP	GO:0060252	positive regulation of glial cell proliferation	1/451	12/10468	0.410662	0.954419	0.954419	MYB	1
BP	GO:0060292	long-term synaptic depression	1/451	12/10468	0.410662	0.954419	0.954419	AGER	1
BP	GO:0060294	cilium movement involved in cell motility	1/451	12/10468	0.410662	0.954419	0.954419	TEKT2	1
BP	GO:0060831	smoothened signaling pathway involved in dorsal/ventral neural tube patterning	1/451	12/10468	0.410662	0.954419	0.954419	GPR161	1
BP	GO:0061081	positive regulation of myeloid leukocyte cytokine production involved in immune response	1/451	12/10468	0.410662	0.954419	0.954419	GPRC5B	1
BP	GO:0071377	cellular response to glucagon stimulus	1/451	12/10468	0.410662	0.954419	0.954419	PRKAR2A	1
BP	GO:0072606	interleukin-8 secretion	1/451	12/10468	0.410662	0.954419	0.954419	CD58	1
BP	GO:0086091	regulation of heart rate by cardiac conduction	1/451	12/10468	0.410662	0.954419	0.954419	YWHAE	1
BP	GO:0090239	regulation of histone H4 acetylation	1/451	12/10468	0.410662	0.954419	0.954419	KAT7	1
BP	GO:0090646	mitochondrial tRNA processing	1/451	12/10468	0.410662	0.954419	0.954419	TRMT10A	1
BP	GO:1904262	negative regulation of TORC1 signaling	1/451	12/10468	0.410662	0.954419	0.954419	ATM	1
BP	GO:1904923	regulation of autophagy of mitochondrion in response to mitochondrial depolarization	1/451	12/10468	0.410662	0.954419	0.954419	CDC37	1
BP	GO:2000479	regulation of cAMP-dependent protein kinase activity	1/451	12/10468	0.410662	0.954419	0.954419	PRKAR2A	1
BP	GO:2001025	positive regulation of response to drug	1/451	12/10468	0.410662	0.954419	0.954419	FOXO3	1
BP	GO:0006612	protein targeting to membrane	8/451	164/10468	0.411297	0.954419	0.954419	RPL22/RPL11/RPS27/SRP9/RPL41/RPS29/SRP14/ZDHHC19	8
BP	GO:0010965	regulation of mitotic sister chromatid separation	3/451	54/10468	0.413062	0.954419	0.954419	ATM/CDT1/CDC6	3
BP	GO:0044784	metaphase/anaphase transition of cell cycle	3/451	54/10468	0.413062	0.954419	0.954419	ATM/CDT1/CDC6	3
BP	GO:0050715	positive regulation of cytokine secretion	3/451	54/10468	0.413062	0.954419	0.954419	CD58/AGER/MAPK14	3
BP	GO:0060349	bone morphogenesis	3/451	54/10468	0.413062	0.954419	0.954419	DHRS3/CHSY1/FGF18	3
BP	GO:0032101	regulation of response to external stimulus	19/451	412/10468	0.413301	0.954419	0.954419	NBL1/PTPRF/ARTN/PTGER3/ATM/TYRO3/GPRC5B/CEBPB/PPM1F/TBC1D23/CLOCK/ELMOD2/FGF18/AGER/MICB/MAPK14/MAPK13/VEGFA/TRIB1	19
BP	GO:0002262	myeloid cell homeostasis	6/451	120/10468	0.414612	0.954419	0.954419	ZFP36/HSPA9/MAPK14/VEGFA/FOXO3/HIPK2	6
BP	GO:0007034	vacuolar transport	6/451	120/10468	0.414612	0.954419	0.954419	SORT1/VPS18/EPG5/AP3D1/RHOB/TRAK1	6
BP	GO:0035194	posttranscriptional gene silencing by RNA	6/451	120/10468	0.414612	0.954419	0.954419	AGO1/ZC3H10/AJUBA/NUP85/ZFP36/SEC13	6
BP	GO:0030036	actin cytoskeleton organization	20/451	435/10468	0.414689	0.954419	0.954419	TESK2/NOS1AP/LMOD1/CDC42BPG/ARPC3/TPM1/COTL1/LLGL1/SSH2/PSTPIP2/PIP5K1C/PLEKHG2/SPTBN4/RHOB/CAPG/POTEKP/PPM1F/TNIK/SDAD1/PRICKLE4	20
BP	GO:0032006	regulation of TOR signaling	4/451	76/10468	0.415501	0.954419	0.954419	ATM/RPTOR/SEC13/EPM2A	4
BP	GO:0018107	peptidyl-threonine phosphorylation	5/451	98/10468	0.415584	0.954419	0.954419	MARK2/CDC42BPG/RPTOR/ACVR1/HIPK2	5
BP	GO:0050679	positive regulation of epithelial cell proliferation	5/451	98/10468	0.415584	0.954419	0.954419	GLUL/RPTOR/HYAL1/VEGFA/MYC	5
BP	GO:1902652	secondary alcohol metabolic process	5/451	98/10468	0.415584	0.954419	0.954419	HSD17B7/LBR/GGPS1/CYP2R1/SCAP	5
BP	GO:0030111	regulation of Wnt signaling pathway	11/451	232/10468	0.41628	0.954419	0.954419	BAMBI/GPRC5B/PSMD3/SMURF2/PSME4/USP34/RUNX1/PSMB8/MAPK14/FOXO3/GNAQ	11
BP	GO:0070588	calcium ion transmembrane transport	8/451	165/10468	0.417908	0.954419	0.954419	NOS1AP/CUL5/FAM155A/CATSPER2/PKD1/ORAI3/SPG7/YWHAE	8
BP	GO:0002720	positive regulation of cytokine production involved in immune response	2/451	33/10468	0.419042	0.954419	0.954419	GPRC5B/MAPK14	2
BP	GO:0006026	aminoglycan catabolic process	2/451	33/10468	0.419042	0.954419	0.954419	GPC6/HYAL1	2
BP	GO:0006298	mismatch repair	2/451	33/10468	0.419042	0.954419	0.954419	PMS2/PMS2P1	2
BP	GO:0007405	neuroblast proliferation	2/451	33/10468	0.419042	0.954419	0.954419	ARTN/VEGFA	2
BP	GO:0010517	regulation of phospholipase activity	2/451	33/10468	0.419042	0.954419	0.954419	ARL1/GNAQ	2
BP	GO:0031663	lipopolysaccharide-mediated signaling pathway	2/451	33/10468	0.419042	0.954419	0.954419	MAPK14/TRIB1	2
BP	GO:0032615	interleukin-12 production	2/451	33/10468	0.419042	0.954419	0.954419	AGER/MAPK14	2
BP	GO:0035337	fatty-acyl-CoA metabolic process	2/451	33/10468	0.419042	0.954419	0.954419	ACOT7/ACAT1	2
BP	GO:0043489	RNA stabilization	2/451	33/10468	0.419042	0.954419	0.954419	ZFP36/MAPK14	2
BP	GO:0045824	negative regulation of innate immune response	2/451	33/10468	0.419042	0.954419	0.954419	TYRO3/PARP14	2
BP	GO:0046530	photoreceptor cell differentiation	2/451	33/10468	0.419042	0.954419	0.954419	DLX1/VEGFA	2
BP	GO:0055008	cardiac muscle tissue morphogenesis	2/451	33/10468	0.419042	0.954419	0.954419	TPM1/ZFPM2	2
BP	GO:0060193	positive regulation of lipase activity	2/451	33/10468	0.419042	0.954419	0.954419	ARL1/GNAQ	2
BP	GO:0060393	regulation of pathway-restricted SMAD protein phosphorylation	2/451	33/10468	0.419042	0.954419	0.954419	GDF11/ACVR1	2
BP	GO:0030335	positive regulation of cell migration	13/451	278/10468	0.421247	0.954419	0.954419	ATM/SMURF2/RHOB/ACVR1/AAMP/PPM1F/CAPN7/ELP6/HYAL1/FGF18/AGER/MAPK14/VEGFA	13
BP	GO:0006414	translational elongation	6/451	121/10468	0.422358	0.954419	0.954419	DAP3/SRP9/MRPL49/MRPL38/EEF2/MRPS33	6
BP	GO:0016441	posttranscriptional gene silencing	6/451	121/10468	0.422358	0.954419	0.954419	AGO1/ZC3H10/AJUBA/NUP85/ZFP36/SEC13	6
BP	GO:0060326	cell chemotaxis	6/451	121/10468	0.422358	0.954419	0.954419	NBL1/NUP85/PIP5K1C/FGF18/MAPK14/VEGFA	6
BP	GO:0001678	cellular glucose homeostasis	5/451	99/10468	0.424167	0.954419	0.954419	MPC2/HKDC1/C2CD2L/AGER/FOXO3	5
BP	GO:0051216	cartilage development	5/451	99/10468	0.424167	0.954419	0.954419	CHSY1/PKD1/HYAL1/FGF18/MAPK14	5
BP	GO:0051668	localization within membrane	5/451	99/10468	0.424167	0.954419	0.954419	GPC6/SEC23A/AP3D1/SEC13/SEC24B	5
BP	GO:0007409	axonogenesis	12/451	256/10468	0.424278	0.954419	0.954419	RAP1GAP/ARTN/UNC5B/MARK2/ROBO3/LLGL1/SPTBN4/TRAK1/PLXNB1/VEGFA/DOK2/EFNB1	12
BP	GO:0043242	negative regulation of protein complex disassembly	3/451	55/10468	0.424683	0.954419	0.954419	LMOD1/SPTBN4/CAPG	3
BP	GO:0046782	regulation of viral transcription	3/451	55/10468	0.424683	0.954419	0.954419	ZFP36/SUPT5H/ZNF639	3
BP	GO:0051149	positive regulation of muscle cell differentiation	3/451	55/10468	0.424683	0.954419	0.954419	BNIP2/OLFM2/MAPK14	3
BP	GO:0060337	type I interferon signaling pathway	3/451	55/10468	0.424683	0.954419	0.954419	IFI6/CDC37/PSMB8	3
BP	GO:0071357	cellular response to type I interferon	3/451	55/10468	0.424683	0.954419	0.954419	IFI6/CDC37/PSMB8	3
BP	GO:1902882	regulation of response to oxidative stress	3/451	55/10468	0.424683	0.954419	0.954419	SFPQ/MCL1/FOXO3	3
BP	GO:2000379	positive regulation of reactive oxygen species metabolic process	3/451	55/10468	0.424683	0.954419	0.954419	NOS1AP/MAPK14/FOXO3	3
BP	GO:0006637	acyl-CoA metabolic process	4/451	77/10468	0.425266	0.954419	0.954419	ACOT7/MPC2/ACAT1/ACSM3	4
BP	GO:0009119	ribonucleoside metabolic process	4/451	77/10468	0.425266	0.954419	0.954419	AHCYL1/HDDC3/APRT/AHCYL2	4
BP	GO:0035383	thioester metabolic process	4/451	77/10468	0.425266	0.954419	0.954419	ACOT7/MPC2/ACAT1/ACSM3	4
BP	GO:0042752	regulation of circadian rhythm	4/451	77/10468	0.425266	0.954419	0.954419	SFPQ/PSPC1/CLOCK/GNAQ	4
BP	GO:0009411	response to UV	6/451	122/10468	0.430089	0.954419	0.954419	DTL/FEN1/ERCC5/HYAL1/MAPK13/MYC	6
BP	GO:0043405	regulation of MAP kinase activity	10/451	212/10468	0.430699	0.954419	0.954419	AJUBA/MAP4K5/TRIB2/TNIK/FGF18/AGER/MAPK14/VEGFA/TRIB1/GADD45G	10
BP	GO:0007565	female pregnancy	5/451	100/10468	0.432726	0.954419	0.954419	UBE2Q1/TMED2/SMURF2/EPOR/GNRH1	5
BP	GO:0000291	nuclear-transcribed mRNA catabolic process, exonucleolytic	2/451	34/10468	0.434035	0.954419	0.954419	EXOSC6/EXOSC2	2
BP	GO:0002712	regulation of B cell mediated immunity	2/451	34/10468	0.434035	0.954419	0.954419	EXOSC6/ATAD5	2
BP	GO:0002889	regulation of immunoglobulin mediated immune response	2/451	34/10468	0.434035	0.954419	0.954419	EXOSC6/ATAD5	2
BP	GO:0007094	mitotic spindle assembly checkpoint	2/451	34/10468	0.434035	0.954419	0.954419	ATM/CDT1	2
BP	GO:0009225	nucleotide-sugar metabolic process	2/451	34/10468	0.434035	0.954419	0.954419	DPAGT1/UGGT1	2
BP	GO:0017001	antibiotic catabolic process	2/451	34/10468	0.434035	0.954419	0.954419	NPL/SULT1A3	2
BP	GO:0018023	peptidyl-lysine trimethylation	2/451	34/10468	0.434035	0.954419	0.954419	ARID4B/PWP1	2
BP	GO:0031577	spindle checkpoint	2/451	34/10468	0.434035	0.954419	0.954419	ATM/CDT1	2
BP	GO:0044275	cellular carbohydrate catabolic process	2/451	34/10468	0.434035	0.954419	0.954419	PPP1R3B/IDNK	2
BP	GO:0071173	spindle assembly checkpoint	2/451	34/10468	0.434035	0.954419	0.954419	ATM/CDT1	2
BP	GO:0071174	mitotic spindle checkpoint	2/451	34/10468	0.434035	0.954419	0.954419	ATM/CDT1	2
BP	GO:0071242	cellular response to ammonium ion	2/451	34/10468	0.434035	0.954419	0.954419	SULT1A3/GNAQ	2
BP	GO:0090311	regulation of protein deacetylation	2/451	34/10468	0.434035	0.954419	0.954419	C6orf89/VEGFA	2
BP	GO:0009896	positive regulation of catabolic process	15/451	326/10468	0.434448	0.954419	0.954419	PLK3/DTL/ATM/SMURF2/CDC37/ZFP36/SUPT5H/TRIB2/ZFP36L2/TIPARP/MYLIP/FOXO3/EPM2A/RNF139/TRIB1	15
BP	GO:0002705	positive regulation of leukocyte mediated immunity	4/451	78/10468	0.43499	0.954419	0.954419	EXOSC6/ATAD5/MICB/ULBP2	4
BP	GO:0048515	spermatid differentiation	4/451	78/10468	0.43499	0.954419	0.954419	CATSPER2/PCSK4/PSME4/TTC26	4
BP	GO:0048754	branching morphogenesis of an epithelial tube	4/451	78/10468	0.43499	0.954419	0.954419	PKD1/ACVR1/VEGFA/MYC	4
BP	GO:0000722	telomere maintenance via recombination	1/451	13/10468	0.436082	0.954419	0.954419	RAD51	1
BP	GO:0002115	store-operated calcium entry	1/451	13/10468	0.436082	0.954419	0.954419	ORAI3	1
BP	GO:0002320	lymphoid progenitor cell differentiation	1/451	13/10468	0.436082	0.954419	0.954419	HES1	1
BP	GO:0006086	acetyl-CoA biosynthetic process from pyruvate	1/451	13/10468	0.436082	0.954419	0.954419	MPC2	1
BP	GO:0006896	Golgi to vacuole transport	1/451	13/10468	0.436082	0.954419	0.954419	AP3D1	1
BP	GO:0008211	glucocorticoid metabolic process	1/451	13/10468	0.436082	0.954419	0.954419	CYP17A1	1
BP	GO:0009404	toxin metabolic process	1/451	13/10468	0.436082	0.954419	0.954419	ARL1	1
BP	GO:0010453	regulation of cell fate commitment	1/451	13/10468	0.436082	0.954419	0.954419	HES1	1
BP	GO:0016973	poly(A)+ mRNA export from nucleus	1/451	13/10468	0.436082	0.954419	0.954419	POLDIP3	1
BP	GO:0017085	response to insecticide	1/451	13/10468	0.436082	0.954419	0.954419	MAPK13	1
BP	GO:0019835	cytolysis	1/451	13/10468	0.436082	0.954419	0.954419	MICB	1
BP	GO:0021952	central nervous system projection neuron axonogenesis	1/451	13/10468	0.436082	0.954419	0.954419	SPTBN4	1
BP	GO:0030575	nuclear body organization	1/451	13/10468	0.436082	0.954419	0.954419	HIPK2	1
BP	GO:0031664	regulation of lipopolysaccharide-mediated signaling pathway	1/451	13/10468	0.436082	0.954419	0.954419	TRIB1	1
BP	GO:0032228	regulation of synaptic transmission, GABAergic	1/451	13/10468	0.436082	0.954419	0.954419	PLCL1	1
BP	GO:0032495	response to muramyl dipeptide	1/451	13/10468	0.436082	0.954419	0.954419	MAPK14	1
BP	GO:0032785	negative regulation of DNA-templated transcription, elongation	1/451	13/10468	0.436082	0.954419	0.954419	SUPT5H	1
BP	GO:0033262	regulation of nuclear cell cycle DNA replication	1/451	13/10468	0.436082	0.954419	0.954419	CDT1	1
BP	GO:0034755	iron ion transmembrane transport	1/451	13/10468	0.436082	0.954419	0.954419	ISCU	1
BP	GO:0035357	peroxisome proliferator activated receptor signaling pathway	1/451	13/10468	0.436082	0.954419	0.954419	CITED2	1
BP	GO:0036342	post-anal tail morphogenesis	1/451	13/10468	0.436082	0.954419	0.954419	TMED2	1
BP	GO:0042159	lipoprotein catabolic process	1/451	13/10468	0.436082	0.954419	0.954419	ATM	1
BP	GO:0042634	regulation of hair cycle	1/451	13/10468	0.436082	0.954419	0.954419	CLOCK	1
BP	GO:0042921	glucocorticoid receptor signaling pathway	1/451	13/10468	0.436082	0.954419	0.954419	CLOCK	1
BP	GO:0043101	purine-containing compound salvage	1/451	13/10468	0.436082	0.954419	0.954419	APRT	1
BP	GO:0045651	positive regulation of macrophage differentiation	1/451	13/10468	0.436082	0.954419	0.954419	TRIB1	1
BP	GO:0045655	regulation of monocyte differentiation	1/451	13/10468	0.436082	0.954419	0.954419	MYC	1
BP	GO:0045992	negative regulation of embryonic development	1/451	13/10468	0.436082	0.954419	0.954419	GPR161	1
BP	GO:0046337	phosphatidylethanolamine metabolic process	1/451	13/10468	0.436082	0.954419	0.954419	LPIN3	1
BP	GO:0046606	negative regulation of centrosome cycle	1/451	13/10468	0.436082	0.954419	0.954419	NUBP1	1
BP	GO:0046697	decidualization	1/451	13/10468	0.436082	0.954419	0.954419	EPOR	1
BP	GO:0048596	embryonic camera-type eye morphogenesis	1/451	13/10468	0.436082	0.954419	0.954419	HIPK2	1
BP	GO:0051016	barbed-end actin filament capping	1/451	13/10468	0.436082	0.954419	0.954419	CAPG	1
BP	GO:0051931	regulation of sensory perception	1/451	13/10468	0.436082	0.954419	0.954419	ZFHX2	1
BP	GO:0051968	positive regulation of synaptic transmission, glutamatergic	1/451	13/10468	0.436082	0.954419	0.954419	GLUL	1
BP	GO:0060965	negative regulation of gene silencing by miRNA	1/451	13/10468	0.436082	0.954419	0.954419	ZC3H10	1
BP	GO:0061684	chaperone-mediated autophagy	1/451	13/10468	0.436082	0.954419	0.954419	PLK3	1
BP	GO:0070989	oxidative demethylation	1/451	13/10468	0.436082	0.954419	0.954419	ALKBH2	1
BP	GO:0071428	rRNA-containing ribonucleoprotein complex export from nucleus	1/451	13/10468	0.436082	0.954419	0.954419	SDAD1	1
BP	GO:0071786	endoplasmic reticulum tubular network organization	1/451	13/10468	0.436082	0.954419	0.954419	TMEM170A	1
BP	GO:0098840	protein transport along microtubule	1/451	13/10468	0.436082	0.954419	0.954419	SFPQ	1
BP	GO:0099118	microtubule-based protein transport	1/451	13/10468	0.436082	0.954419	0.954419	SFPQ	1
BP	GO:1902165	regulation of intrinsic apoptotic signaling pathway in response to DNA damage by p53 class mediator	1/451	13/10468	0.436082	0.954419	0.954419	ATAD5	1
BP	GO:1902570	protein localization to nucleolus	1/451	13/10468	0.436082	0.954419	0.954419	GLUL	1
BP	GO:1902969	mitotic DNA replication	1/451	13/10468	0.436082	0.954419	0.954419	RAD51	1
BP	GO:1903205	regulation of hydrogen peroxide-induced cell death	1/451	13/10468	0.436082	0.954419	0.954419	FOXO3	1
BP	GO:1905144	response to acetylcholine	1/451	13/10468	0.436082	0.954419	0.954419	GNAQ	1
BP	GO:1905145	cellular response to acetylcholine	1/451	13/10468	0.436082	0.954419	0.954419	GNAQ	1
BP	GO:0016239	positive regulation of macroautophagy	3/451	56/10468	0.436224	0.954419	0.954419	CDC37/SUPT5H/EPM2A	3
BP	GO:0043506	regulation of JUN kinase activity	3/451	56/10468	0.436224	0.954419	0.954419	MAP4K5/TNIK/AGER	3
BP	GO:0046834	lipid phosphorylation	3/451	56/10468	0.436224	0.954419	0.954419	PI4KB/SMG1/PIP5K1C	3
BP	GO:0048709	oligodendrocyte differentiation	3/451	56/10468	0.436224	0.954419	0.954419	DLX1/HES1/TNFRSF21	3
BP	GO:1902106	negative regulation of leukocyte differentiation	3/451	56/10468	0.436224	0.954419	0.954419	RUNX1/TRIB1/MYC	3
BP	GO:1903409	reactive oxygen species biosynthetic process	3/451	56/10468	0.436224	0.954419	0.954419	NOS1AP/SPR/FOXO3	3
BP	GO:0060070	canonical Wnt signaling pathway	10/451	213/10468	0.436555	0.954419	0.954419	BAMBI/GPRC5B/PSMD3/SMURF2/PSME4/USP34/PSMB8/MAPK14/FOXO3/GNAQ	10
BP	GO:1901617	organic hydroxy compound biosynthetic process	8/451	168/10468	0.437711	0.954419	0.954419	HSD17B7/LBR/GGPS1/CYP2R1/SPR/PLCL1/SCAP/PCBD2	8
BP	GO:0043112	receptor metabolic process	6/451	123/10468	0.437804	0.954419	0.954419	AP2S1/SCAP/LRPAP1/CAMLG/MYLIP/VEGFA	6
BP	GO:0090501	RNA phosphodiester bond hydrolysis	6/451	123/10468	0.437804	0.954419	0.954419	AGO1/FEN1/EXOSC6/RPP21/POP7/EXOSC2	6
BP	GO:0048511	rhythmic process	9/451	191/10468	0.44031	0.954419	0.954419	SFPQ/DTL/PSPC1/TYRO3/RAI1/CLOCK/FOXO3/GNRH1/GNAQ	9
BP	GO:0046031	ADP metabolic process	5/451	101/10468	0.441259	0.954419	0.954419	HKDC1/ECD/ALDOC/NUP85/SEC13	5
BP	GO:0001667	ameboidal-type cell migration	11/451	237/10468	0.444126	0.954419	0.954419	GLUL/SMURF2/RHOB/ACVR1/AAMP/PPM1F/CAPN7/HYAL1/FGF18/VEGFA/EFNB1	11
BP	GO:0042775	mitochondrial ATP synthesis coupled electron transport	4/451	79/10468	0.444668	0.954419	0.954419	SDHC/SDHD/ISCU/NDUFB7	4
BP	GO:0036473	cell death in response to oxidative stress	3/451	57/10468	0.447678	0.954419	0.954419	SFPQ/MCL1/FOXO3	3
BP	GO:0051306	mitotic sister chromatid separation	3/451	57/10468	0.447678	0.954419	0.954419	ATM/CDT1/CDC6	3
BP	GO:0006369	termination of RNA polymerase II transcription	2/451	35/10468	0.448819	0.954419	0.954419	TTF2/SNRPG	2
BP	GO:0008631	intrinsic apoptotic signaling pathway in response to oxidative stress	2/451	35/10468	0.448819	0.954419	0.954419	SFPQ/MCL1	2
BP	GO:0032007	negative regulation of TOR signaling	2/451	35/10468	0.448819	0.954419	0.954419	ATM/EPM2A	2
BP	GO:0032233	positive regulation of actin filament bundle assembly	2/451	35/10468	0.448819	0.954419	0.954419	TPM1/PPM1F	2
BP	GO:0043536	positive regulation of blood vessel endothelial cell migration	2/451	35/10468	0.448819	0.954419	0.954419	FGF18/VEGFA	2
BP	GO:0045840	positive regulation of mitotic nuclear division	2/451	35/10468	0.448819	0.954419	0.954419	NUSAP1/CDT1	2
BP	GO:0045844	positive regulation of striated muscle tissue development	2/451	35/10468	0.448819	0.954419	0.954419	MAPK14/ZFPM2	2
BP	GO:0048636	positive regulation of muscle organ development	2/451	35/10468	0.448819	0.954419	0.954419	MAPK14/ZFPM2	2
BP	GO:0048857	neural nucleus development	2/451	35/10468	0.448819	0.954419	0.954419	YWHAE/SEC24B	2
BP	GO:0050879	multicellular organismal movement	2/451	35/10468	0.448819	0.954419	0.954419	EEF2/HIPK2	2
BP	GO:0050881	musculoskeletal movement	2/451	35/10468	0.448819	0.954419	0.954419	EEF2/HIPK2	2
BP	GO:0060389	pathway-restricted SMAD protein phosphorylation	2/451	35/10468	0.448819	0.954419	0.954419	GDF11/ACVR1	2
BP	GO:0060395	SMAD protein signal transduction	2/451	35/10468	0.448819	0.954419	0.954419	GDF11/HIPK2	2
BP	GO:0072350	tricarboxylic acid metabolic process	2/451	35/10468	0.448819	0.954419	0.954419	SDHC/SDHD	2
BP	GO:0072583	clathrin-dependent endocytosis	2/451	35/10468	0.448819	0.954419	0.954419	PIP5K1C/AP2S1	2
BP	GO:0098586	cellular response to virus	2/451	35/10468	0.448819	0.954419	0.954419	IFI6/MAPK14	2
BP	GO:1901863	positive regulation of muscle tissue development	2/451	35/10468	0.448819	0.954419	0.954419	MAPK14/ZFPM2	2
BP	GO:1902373	negative regulation of mRNA catabolic process	2/451	35/10468	0.448819	0.954419	0.954419	ZFP36/MAPK14	2
BP	GO:0006406	mRNA export from nucleus	5/451	102/10468	0.449761	0.954419	0.954419	SRRM1/SMG1/NUP85/POLDIP3/SEC13	5
BP	GO:0018210	peptidyl-threonine modification	5/451	102/10468	0.449761	0.954419	0.954419	MARK2/CDC42BPG/RPTOR/ACVR1/HIPK2	5
BP	GO:0030010	establishment of cell polarity	5/451	102/10468	0.449761	0.954419	0.954419	MARK2/PKD1/LLGL1/SIPA1L3/HES1	5
BP	GO:0032434	regulation of proteasomal ubiquitin-dependent protein catabolic process	5/451	102/10468	0.449761	0.954419	0.954419	RPL11/PLK3/TRIB2/CAMLG/TRIB1	5
BP	GO:0042157	lipoprotein metabolic process	5/451	102/10468	0.449761	0.954419	0.954419	GLUL/ATM/ZDHHC19/PIGZ/MTTP	5
BP	GO:0045619	regulation of lymphocyte differentiation	5/451	102/10468	0.449761	0.954419	0.954419	ZNF683/AP3D1/ZFP36L2/RUNX1/MYB	5
BP	GO:0050731	positive regulation of peptidyl-tyrosine phosphorylation	5/451	102/10468	0.449761	0.954419	0.954419	GPRC5B/ACVR1/PARP14/HES1/VEGFA	5
BP	GO:0071427	mRNA-containing ribonucleoprotein complex export from nucleus	5/451	102/10468	0.449761	0.954419	0.954419	SRRM1/SMG1/NUP85/POLDIP3/SEC13	5
BP	GO:0046777	protein autophosphorylation	8/451	170/10468	0.45087	0.954419	0.954419	GRK5/MARK2/ATM/TYRO3/SMG1/TNIK/VEGFA/RAP2C	8
BP	GO:0045930	negative regulation of mitotic cell cycle	12/451	261/10468	0.450872	0.954419	0.954419	CLSPN/PLK3/ORC1/ATM/BRD7/CDT1/PSMD3/CDC6/ARID3A/ZFP36L2/PSME4/PSMB8	12
BP	GO:0006405	RNA export from nucleus	6/451	125/10468	0.453175	0.954419	0.954419	SRRM1/SMG1/NUP85/POLDIP3/SEC13/SDAD1	6
BP	GO:0009749	response to glucose	6/451	125/10468	0.453175	0.954419	0.954419	ENSA/MPC2/GLUL/C2CD2L/AGER/FOXO3	6
BP	GO:0001503	ossification	10/451	216/10468	0.454088	0.954419	0.954419	DHRS3/SORT1/EXT2/CHSY1/ACVR1/CEBPB/PLXNB1/IGSF10/FGF18/MAPK14	10
BP	GO:0007018	microtubule-based movement	10/451	216/10468	0.454088	0.954419	0.954419	SFPQ/TEKT2/IFT46/AP3S2/SPG7/AP3D1/DYNLRB1/TRAK1/TTC26/PCM1	10
BP	GO:0042773	ATP synthesis coupled electron transport	4/451	80/10468	0.454295	0.954419	0.954419	SDHC/SDHD/ISCU/NDUFB7	4
BP	GO:0002285	lymphocyte activation involved in immune response	5/451	103/10468	0.45823	0.954419	0.954419	ZNF683/UNG/EXOSC6/ATAD5/MYB	5
BP	GO:0030278	regulation of ossification	5/451	103/10468	0.45823	0.954419	0.954419	DHRS3/CHSY1/ACVR1/CEBPB/MAPK14	5
BP	GO:0042542	response to hydrogen peroxide	5/451	103/10468	0.45823	0.954419	0.954419	EEF2/RHOB/MAPK13/FOXO3/MYB	5
BP	GO:0002062	chondrocyte differentiation	3/451	58/10468	0.459037	0.954419	0.954419	CHSY1/FGF18/MAPK14	3
BP	GO:0009791	post-embryonic development	3/451	58/10468	0.459037	0.954419	0.954419	ATM/TIPARP/VEGFA	3
BP	GO:0031571	mitotic G1 DNA damage checkpoint	3/451	58/10468	0.459037	0.954419	0.954419	PLK3/ATM/ARID3A	3
BP	GO:0032411	positive regulation of transporter activity	3/451	58/10468	0.459037	0.954419	0.954419	RNF207/NOS1AP/GLRX	3
BP	GO:0033866	nucleoside bisphosphate biosynthetic process	3/451	58/10468	0.459037	0.954419	0.954419	ACOT7/MPC2/ACAT1	3
BP	GO:0034030	ribonucleoside bisphosphate biosynthetic process	3/451	58/10468	0.459037	0.954419	0.954419	ACOT7/MPC2/ACAT1	3
BP	GO:0034033	purine nucleoside bisphosphate biosynthetic process	3/451	58/10468	0.459037	0.954419	0.954419	ACOT7/MPC2/ACAT1	3
BP	GO:0034340	response to type I interferon	3/451	58/10468	0.459037	0.954419	0.954419	IFI6/CDC37/PSMB8	3
BP	GO:0035710	CD4-positive, alpha-beta T cell activation	3/451	58/10468	0.459037	0.954419	0.954419	RUNX1/AGER/MYB	3
BP	GO:0044819	mitotic G1/S transition checkpoint	3/451	58/10468	0.459037	0.954419	0.954419	PLK3/ATM/ARID3A	3
BP	GO:1905818	regulation of chromosome separation	3/451	58/10468	0.459037	0.954419	0.954419	ATM/CDT1/CDC6	3
BP	GO:0009259	ribonucleotide metabolic process	18/451	400/10468	0.459286	0.954419	0.954419	ACOT7/SDHC/MPC2/HKDC1/ECD/ACAT1/SDHD/ISCU/HDDC3/ACSM3/SULT1A3/SULT1A4/APRT/ALDOC/NUP85/NDUFB7/SEC13/HINT1	18
BP	GO:0071103	DNA conformation change	10/451	217/10468	0.459918	0.954419	0.954419	SART3/RAD51/OIP5/NUSAP1/ASF1B/PSME4/TOP3B/CENPC/SHPRH/RECQL4	10
BP	GO:0001914	regulation of T cell mediated cytotoxicity	1/451	14/10468	0.460408	0.954419	0.954419	AGER	1
BP	GO:0002092	positive regulation of receptor internalization	1/451	14/10468	0.460408	0.954419	0.954419	VEGFA	1
BP	GO:0002691	regulation of cellular extravasation	1/451	14/10468	0.460408	0.954419	0.954419	AGER	1
BP	GO:0006047	UDP-N-acetylglucosamine metabolic process	1/451	14/10468	0.460408	0.954419	0.954419	DPAGT1	1
BP	GO:0006349	regulation of gene expression by genetic imprinting	1/451	14/10468	0.460408	0.954419	0.954419	ARID4B	1
BP	GO:0006390	mitochondrial transcription	1/451	14/10468	0.460408	0.954419	0.954419	FOXO3	1
BP	GO:0006999	nuclear pore organization	1/451	14/10468	0.460408	0.954419	0.954419	TMEM170A	1
BP	GO:0010714	positive regulation of collagen metabolic process	1/451	14/10468	0.460408	0.954419	0.954419	MYB	1
BP	GO:0010894	negative regulation of steroid biosynthetic process	1/451	14/10468	0.460408	0.954419	0.954419	SCAP	1
BP	GO:0019081	viral translation	1/451	14/10468	0.460408	0.954419	0.954419	EIF2D	1
BP	GO:0019934	cGMP-mediated signaling	1/451	14/10468	0.460408	0.954419	0.954419	PRKAR2A	1
BP	GO:0021983	pituitary gland development	1/451	14/10468	0.460408	0.954419	0.954419	HES1	1
BP	GO:0030325	adrenal gland development	1/451	14/10468	0.460408	0.954419	0.954419	CITED2	1
BP	GO:0030952	establishment or maintenance of cytoskeleton polarity	1/451	14/10468	0.460408	0.954419	0.954419	RHOB	1
BP	GO:0031128	developmental induction	1/451	14/10468	0.460408	0.954419	0.954419	HIPK2	1
BP	GO:0031645	negative regulation of neurological system process	1/451	14/10468	0.460408	0.954419	0.954419	TNFRSF21	1
BP	GO:0031958	corticosteroid receptor signaling pathway	1/451	14/10468	0.460408	0.954419	0.954419	CLOCK	1
BP	GO:0032616	interleukin-13 production	1/451	14/10468	0.460408	0.954419	0.954419	TNFRSF21	1
BP	GO:0032673	regulation of interleukin-4 production	1/451	14/10468	0.460408	0.954419	0.954419	CEBPB	1
BP	GO:0032703	negative regulation of interleukin-2 production	1/451	14/10468	0.460408	0.954419	0.954419	ZFP36	1
BP	GO:0032967	positive regulation of collagen biosynthetic process	1/451	14/10468	0.460408	0.954419	0.954419	MYB	1
BP	GO:0035162	embryonic hemopoiesis	1/451	14/10468	0.460408	0.954419	0.954419	VEGFA	1
BP	GO:0035493	SNARE complex assembly	1/451	14/10468	0.460408	0.954419	0.954419	VPS18	1
BP	GO:0035902	response to immobilization stress	1/451	14/10468	0.460408	0.954419	0.954419	FOXO3	1
BP	GO:0036120	cellular response to platelet-derived growth factor stimulus	1/451	14/10468	0.460408	0.954419	0.954419	HYAL1	1
BP	GO:0042994	cytoplasmic sequestering of transcription factor	1/451	14/10468	0.460408	0.954419	0.954419	PKD1	1
BP	GO:0045116	protein neddylation	1/451	14/10468	0.460408	0.954419	0.954419	RPL11	1
BP	GO:0045777	positive regulation of blood pressure	1/451	14/10468	0.460408	0.954419	0.954419	TPM1	1
BP	GO:0045939	negative regulation of steroid metabolic process	1/451	14/10468	0.460408	0.954419	0.954419	SCAP	1
BP	GO:0048268	clathrin coat assembly	1/451	14/10468	0.460408	0.954419	0.954419	AP2S1	1
BP	GO:0048308	organelle inheritance	1/451	14/10468	0.460408	0.954419	0.954419	PLK3	1
BP	GO:0048313	Golgi inheritance	1/451	14/10468	0.460408	0.954419	0.954419	PLK3	1
BP	GO:0048385	regulation of retinoic acid receptor signaling pathway	1/451	14/10468	0.460408	0.954419	0.954419	DHRS3	1
BP	GO:0051000	positive regulation of nitric-oxide synthase activity	1/451	14/10468	0.460408	0.954419	0.954419	NOS1AP	1
BP	GO:0051131	chaperone-mediated protein complex assembly	1/451	14/10468	0.460408	0.954419	0.954419	BBS10	1
BP	GO:0051382	kinetochore assembly	1/451	14/10468	0.460408	0.954419	0.954419	CENPC	1
BP	GO:0051571	positive regulation of histone H3-K4 methylation	1/451	14/10468	0.460408	0.954419	0.954419	MYB	1
BP	GO:0051900	regulation of mitochondrial depolarization	1/451	14/10468	0.460408	0.954419	0.954419	IFI6	1
BP	GO:0060008	Sertoli cell differentiation	1/451	14/10468	0.460408	0.954419	0.954419	ARID4B	1
BP	GO:0060143	positive regulation of syncytium formation by plasma membrane fusion	1/451	14/10468	0.460408	0.954419	0.954419	MAPK14	1
BP	GO:0062033	positive regulation of mitotic sister chromatid segregation	1/451	14/10468	0.460408	0.954419	0.954419	CDT1	1
BP	GO:0070734	histone H3-K27 methylation	1/451	14/10468	0.460408	0.954419	0.954419	PHF19	1
BP	GO:0070828	heterochromatin organization	1/451	14/10468	0.460408	0.954419	0.954419	MTHFR	1
BP	GO:0090231	regulation of spindle checkpoint	1/451	14/10468	0.460408	0.954419	0.954419	CDT1	1
BP	GO:0090266	regulation of mitotic cell cycle spindle assembly checkpoint	1/451	14/10468	0.460408	0.954419	0.954419	CDT1	1
BP	GO:0099632	protein transport within plasma membrane	1/451	14/10468	0.460408	0.954419	0.954419	AP3D1	1
BP	GO:0099637	neurotransmitter receptor transport	1/451	14/10468	0.460408	0.954419	0.954419	AP3D1	1
BP	GO:1901685	glutathione derivative metabolic process	1/451	14/10468	0.460408	0.954419	0.954419	GSTM3	1
BP	GO:1901687	glutathione derivative biosynthetic process	1/451	14/10468	0.460408	0.954419	0.954419	GSTM3	1
BP	GO:1902683	regulation of receptor localization to synapse	1/451	14/10468	0.460408	0.954419	0.954419	GPC6	1
BP	GO:1902692	regulation of neuroblast proliferation	1/451	14/10468	0.460408	0.954419	0.954419	VEGFA	1
BP	GO:1903020	positive regulation of glycoprotein metabolic process	1/451	14/10468	0.460408	0.954419	0.954419	PXYLP1	1
BP	GO:1903358	regulation of Golgi organization	1/451	14/10468	0.460408	0.954419	0.954419	PDE4DIP	1
BP	GO:1903429	regulation of cell maturation	1/451	14/10468	0.460408	0.954419	0.954419	TBX6	1
BP	GO:1903504	regulation of mitotic spindle checkpoint	1/451	14/10468	0.460408	0.954419	0.954419	CDT1	1
BP	GO:1903798	regulation of production of miRNAs involved in gene silencing by miRNA	1/451	14/10468	0.460408	0.954419	0.954419	ZC3H10	1
BP	GO:2000209	regulation of anoikis	1/451	14/10468	0.460408	0.954419	0.954419	MCL1	1
BP	GO:2000810	regulation of bicellular tight junction assembly	1/451	14/10468	0.460408	0.954419	0.954419	RUNX1	1
BP	GO:2000147	positive regulation of cell motility	13/451	286/10468	0.462046	0.954419	0.954419	ATM/SMURF2/RHOB/ACVR1/AAMP/PPM1F/CAPN7/ELP6/HYAL1/FGF18/AGER/MAPK14/VEGFA	13
BP	GO:0040017	positive regulation of locomotion	14/451	309/10468	0.462503	0.954419	0.954419	ARTN/ATM/SMURF2/RHOB/ACVR1/AAMP/PPM1F/CAPN7/ELP6/HYAL1/FGF18/AGER/MAPK14/VEGFA	14
BP	GO:0007162	negative regulation of cell adhesion	7/451	149/10468	0.462648	0.954419	0.954419	CEBPB/RUNX1/PPM1F/PLXNB1/VEGFA/TNFRSF21/GNRH1	7
BP	GO:0008154	actin polymerization or depolymerization	7/451	149/10468	0.462648	0.954419	0.954419	LMOD1/ARPC3/COTL1/PSTPIP2/PLEKHG2/SPTBN4/CAPG	7
BP	GO:0043254	regulation of protein complex assembly	15/451	332/10468	0.462873	0.954419	0.954419	LMOD1/ATM/BBS10/ARPC3/ERCC5/AJUBA/VPS18/COTL1/CDT1/NCLN/PLEKHG2/SPTBN4/CAPG/SEC24B/VEGFA	15
BP	GO:0002090	regulation of receptor internalization	2/451	36/10468	0.463382	0.954419	0.954419	LRPAP1/VEGFA	2
BP	GO:0002532	production of molecular mediator involved in inflammatory response	2/451	36/10468	0.463382	0.954419	0.954419	SNAP23/MAPK14	2
BP	GO:0002763	positive regulation of myeloid leukocyte differentiation	2/451	36/10468	0.463382	0.954419	0.954419	RUNX1/TRIB1	2
BP	GO:0006809	nitric oxide biosynthetic process	2/451	36/10468	0.463382	0.954419	0.954419	NOS1AP/SPR	2
BP	GO:0030488	tRNA methylation	2/451	36/10468	0.463382	0.954419	0.954419	TRMT10A/METTL2B	2
BP	GO:0032623	interleukin-2 production	2/451	36/10468	0.463382	0.954419	0.954419	ZFP36/RUNX1	2
BP	GO:0035196	production of miRNAs involved in gene silencing by miRNA	2/451	36/10468	0.463382	0.954419	0.954419	AGO1/ZC3H10	2
BP	GO:0035722	interleukin-12-mediated signaling pathway	2/451	36/10468	0.463382	0.954419	0.954419	SNRPA1/HSPA9	2
BP	GO:0042771	intrinsic apoptotic signaling pathway in response to DNA damage by p53 class mediator	2/451	36/10468	0.463382	0.954419	0.954419	ATAD5/HIPK2	2
BP	GO:0043388	positive regulation of DNA binding	2/451	36/10468	0.463382	0.954419	0.954419	HES1/HIPK2	2
BP	GO:0045841	negative regulation of mitotic metaphase/anaphase transition	2/451	36/10468	0.463382	0.954419	0.954419	ATM/CDT1	2
BP	GO:0046825	regulation of protein export from nucleus	2/451	36/10468	0.463382	0.954419	0.954419	YWHAE/RBM22	2
BP	GO:0051293	establishment of spindle localization	2/451	36/10468	0.463382	0.954419	0.954419	NUSAP1/LLGL1	2
BP	GO:0055021	regulation of cardiac muscle tissue growth	2/451	36/10468	0.463382	0.954419	0.954419	MAPK14/ZFPM2	2
BP	GO:0070849	response to epidermal growth factor	2/451	36/10468	0.463382	0.954419	0.954419	ZFP36/ZFP36L2	2
BP	GO:0071300	cellular response to retinoic acid	2/451	36/10468	0.463382	0.954419	0.954419	ATM/MYB	2
BP	GO:0090224	regulation of spindle organization	2/451	36/10468	0.463382	0.954419	0.954419	PKD1/STAG1	2
BP	GO:0097064	ncRNA export from nucleus	2/451	36/10468	0.463382	0.954419	0.954419	NUP85/SEC13	2
BP	GO:1902100	negative regulation of metaphase/anaphase transition of cell cycle	2/451	36/10468	0.463382	0.954419	0.954419	ATM/CDT1	2
BP	GO:1903779	regulation of cardiac conduction	2/451	36/10468	0.463382	0.954419	0.954419	RNF207/AHCYL1	2
BP	GO:2000241	regulation of reproductive process	4/451	81/10468	0.463867	0.954419	0.954419	SMURF2/CITED2/GNRH1/ZFPM2	4
BP	GO:0072330	monocarboxylic acid biosynthetic process	10/451	218/10468	0.465738	0.954419	0.954419	ACOT7/HKDC1/ECD/ACSM3/ALDOC/NUP85/GAD1/SEC13/SCAP/TBXAS1	10
BP	GO:0030029	actin filament-based process	21/451	471/10468	0.467941	0.954419	0.954419	RNF207/TESK2/NOS1AP/LMOD1/CDC42BPG/ARPC3/TPM1/COTL1/LLGL1/SSH2/PSTPIP2/PIP5K1C/PLEKHG2/SPTBN4/RHOB/CAPG/POTEKP/PPM1F/TNIK/SDAD1/PRICKLE4	21
BP	GO:0009746	response to hexose	6/451	127/10468	0.468449	0.954419	0.954419	ENSA/MPC2/GLUL/C2CD2L/AGER/FOXO3	6
BP	GO:0045165	cell fate commitment	6/451	127/10468	0.468449	0.954419	0.954419	MCL1/TBX6/ACVR1/DLX1/CEBPB/HES1	6
BP	GO:0045665	negative regulation of neuron differentiation	6/451	127/10468	0.468449	0.954419	0.954419	GDF11/TBX6/DLX1/HES1/MYLIP/FOXO3	6
BP	GO:0007093	mitotic cell cycle checkpoint	7/451	150/10468	0.469661	0.954419	0.954419	CLSPN/PLK3/ORC1/ATM/CDT1/CDC6/ARID3A	7
BP	GO:0001704	formation of primary germ layer	3/451	59/10468	0.470295	0.954419	0.954419	EXT2/TBX6/ACVR1	3
BP	GO:0030219	megakaryocyte differentiation	3/451	59/10468	0.470295	0.954419	0.954419	AGO1/SETD1A/RUNX1	3
BP	GO:0031397	negative regulation of protein ubiquitination	3/451	59/10468	0.470295	0.954419	0.954419	RPL11/IVNS1ABP/CAMLG	3
BP	GO:0044783	G1 DNA damage checkpoint	3/451	59/10468	0.470295	0.954419	0.954419	PLK3/ATM/ARID3A	3
BP	GO:0055072	iron ion homeostasis	3/451	59/10468	0.470295	0.954419	0.954419	ISCU/NUBP1/MYC	3
BP	GO:0120162	positive regulation of cold-induced thermogenesis	3/451	59/10468	0.470295	0.954419	0.954419	CEBPB/VEGFA/GADD45G	3
BP	GO:1901888	regulation of cell junction assembly	3/451	59/10468	0.470295	0.954419	0.954419	RUNX1/PPM1F/VEGFA	3
BP	GO:0010631	epithelial cell migration	8/451	173/10468	0.47051	0.954419	0.954419	GLUL/RHOB/AAMP/PPM1F/CAPN7/HYAL1/FGF18/VEGFA	8
BP	GO:0000209	protein polyubiquitination	12/451	265/10468	0.472067	0.954419	0.954419	FBXO2/FBXO44/DTL/PSMD3/NPEPPS/SMURF2/FBXO11/PSME4/PSMB8/MYLIP/SHPRH/UBE2R2	12
BP	GO:0043547	positive regulation of GTPase activity	12/451	265/10468	0.472067	0.954419	0.954419	RAP1GAP/SMAP2/AGAP6/SEC23A/BNIP2/ACAP1/LLGL1/SIPA1L3/PLXNB1/ELMOD2/ARAP3/GNAQ	12
BP	GO:0048667	cell morphogenesis involved in neuron differentiation	15/451	334/10468	0.472321	0.954419	0.954419	RAP1GAP/ARTN/UNC5B/MARK2/ROBO3/LLGL1/SPTBN4/TRAK1/PLXNB1/TNIK/HES1/SEC24B/VEGFA/DOK2/EFNB1	15
BP	GO:0008630	intrinsic apoptotic signaling pathway in response to DNA damage	4/451	82/10468	0.473379	0.954419	0.954419	MCL1/ATM/ATAD5/HIPK2	4
BP	GO:0001659	temperature homeostasis	5/451	105/10468	0.475053	0.954419	0.954419	PTGER3/PLCL1/CEBPB/VEGFA/GADD45G	5
BP	GO:0060047	heart contraction	6/451	128/10468	0.476044	0.954419	0.954419	RNF207/AHCYL1/NOS1AP/TPM1/YWHAE/SPTBN4	6
BP	GO:0042113	B cell activation	7/451	151/10468	0.476652	0.954419	0.954419	IRF2BP2/ATM/UNG/EXOSC6/ATAD5/ZFP36L2/TNFRSF21	7
BP	GO:0006091	generation of precursor metabolites and energy	17/451	381/10468	0.476716	0.954419	0.954419	DHRS3/SDHC/HKDC1/ECD/ACAT1/SDHD/HSD17B6/ISCU/ALDOC/NUP85/NDUFB7/SEC13/GLRX/LYRM7/IMMP2L/PPP1R3B/MYC	17
BP	GO:0090132	epithelium migration	8/451	174/10468	0.477023	0.954419	0.954419	GLUL/RHOB/AAMP/PPM1F/CAPN7/HYAL1/FGF18/VEGFA	8
BP	GO:0016311	dephosphorylation	15/451	335/10468	0.477038	0.954419	0.954419	SPOCD1/PTPRF/CTTNBP2NL/ENSA/DUSP23/DUSP13/PTPN21/YWHAE/SSH2/LPIN3/PPM1F/PXYLP1/PPA2/BOD1/PPP1R3B	15
BP	GO:0009152	purine ribonucleotide biosynthetic process	9/451	197/10468	0.477239	0.954419	0.954419	ACOT7/MPC2/HKDC1/ECD/ACAT1/APRT/ALDOC/NUP85/SEC13	9
BP	GO:0008015	blood circulation	11/451	243/10468	0.477375	0.954419	0.954419	RNF207/MTHFR/AHCYL1/NOS1AP/TPM1/ACSM3/YWHAE/SPTBN4/AGER/VEGFA/IMMP2L	11
BP	GO:0003208	cardiac ventricle morphogenesis	2/451	37/10468	0.477717	0.954419	0.954419	TPM1/ZFPM2	2
BP	GO:0009069	serine family amino acid metabolic process	2/451	37/10468	0.477717	0.954419	0.954419	AHCYL1/AHCYL2	2
BP	GO:0032768	regulation of monooxygenase activity	2/451	37/10468	0.477717	0.954419	0.954419	NOS1AP/SPR	2
BP	GO:0034508	centromere complex assembly	2/451	37/10468	0.477717	0.954419	0.954419	OIP5/CENPC	2
BP	GO:0042531	positive regulation of tyrosine phosphorylation of STAT protein	2/451	37/10468	0.477717	0.954419	0.954419	PARP14/HES1	2
BP	GO:0045747	positive regulation of Notch signaling pathway	2/451	37/10468	0.477717	0.954419	0.954419	MAML2/HES1	2
BP	GO:0071349	cellular response to interleukin-12	2/451	37/10468	0.477717	0.954419	0.954419	SNRPA1/HSPA9	2
BP	GO:1903214	regulation of protein targeting to mitochondrion	2/451	37/10468	0.477717	0.954419	0.954419	NPEPPS/SAE1	2
BP	GO:1905819	negative regulation of chromosome separation	2/451	37/10468	0.477717	0.954419	0.954419	ATM/CDT1	2
BP	GO:2000816	negative regulation of mitotic sister chromatid separation	2/451	37/10468	0.477717	0.954419	0.954419	ATM/CDT1	2
BP	GO:0051345	positive regulation of hydrolase activity	22/451	497/10468	0.47961	0.954419	0.954419	RAP1GAP/SMAP2/DNAJC1/AGAP6/ARL1/SEC23A/BNIP2/TPM1/ACAP1/LLGL1/SIPA1L3/PSME4/PPM1F/PLXNB1/ELMOD2/ARAP3/AGER/MAPK14/C6orf89/VEGFA/MYC/GNAQ	22
BP	GO:0001676	long-chain fatty acid metabolic process	3/451	60/10468	0.481448	0.954419	0.954419	ACOT7/CYP2S1/TBXAS1	3
BP	GO:0007605	sensory perception of sound	3/451	60/10468	0.481448	0.954419	0.954419	TIMM8B/SPTBN4/FBXO11	3
BP	GO:0032526	response to retinoic acid	3/451	60/10468	0.481448	0.954419	0.954419	ATM/MICB/MYB	3
BP	GO:0045621	positive regulation of lymphocyte differentiation	3/451	60/10468	0.481448	0.954419	0.954419	AP3D1/RUNX1/MYB	3
BP	GO:0043087	regulation of GTPase activity	14/451	313/10468	0.482045	0.954419	0.954419	RAP1GAP/SMAP2/AGAP6/TMED2/AJUBA/SEC23A/BNIP2/ACAP1/LLGL1/SIPA1L3/PLXNB1/ELMOD2/ARAP3/GNAQ	14
BP	GO:0002700	regulation of production of molecular mediator of immune response	4/451	83/10468	0.482828	0.954419	0.954419	GPRC5B/EXOSC6/ATAD5/MAPK14	4
BP	GO:0006941	striated muscle contraction	4/451	83/10468	0.482828	0.954419	0.954419	RNF207/NOS1AP/TPM1/EEF2	4
BP	GO:0045580	regulation of T cell differentiation	4/451	83/10468	0.482828	0.954419	0.954419	ZNF683/AP3D1/RUNX1/MYB	4
BP	GO:0032970	regulation of actin filament-based process	11/451	244/10468	0.482884	0.954419	0.954419	RNF207/NOS1AP/LMOD1/ARPC3/TPM1/COTL1/PLEKHG2/SPTBN4/RHOB/CAPG/PPM1F	11
BP	GO:0090130	tissue migration	8/451	175/10468	0.483518	0.954419	0.954419	GLUL/RHOB/AAMP/PPM1F/CAPN7/HYAL1/FGF18/VEGFA	8
BP	GO:0110053	regulation of actin filament organization	8/451	175/10468	0.483518	0.954419	0.954419	LMOD1/ARPC3/TPM1/COTL1/PLEKHG2/SPTBN4/CAPG/PPM1F	8
BP	GO:1903050	regulation of proteolysis involved in cellular protein catabolic process	8/451	175/10468	0.483518	0.954419	0.954419	RPL11/PLK3/PKD1/TRIB2/CAMLG/HIPK2/RNF139/TRIB1	8
BP	GO:0009127	purine nucleoside monophosphate biosynthetic process	6/451	129/10468	0.483607	0.954419	0.954419	HKDC1/ECD/APRT/ALDOC/NUP85/SEC13	6
BP	GO:0009168	purine ribonucleoside monophosphate biosynthetic process	6/451	129/10468	0.483607	0.954419	0.954419	HKDC1/ECD/APRT/ALDOC/NUP85/SEC13	6
BP	GO:0000028	ribosomal small subunit assembly	1/451	15/10468	0.483687	0.954419	0.954419	RPS27	1
BP	GO:0002098	tRNA wobble uridine modification	1/451	15/10468	0.483687	0.954419	0.954419	ELP6	1
BP	GO:0002548	monocyte chemotaxis	1/451	15/10468	0.483687	0.954419	0.954419	NBL1	1
BP	GO:0003044	regulation of systemic arterial blood pressure mediated by a chemical signal	1/451	15/10468	0.483687	0.954419	0.954419	TPM1	1
BP	GO:0003171	atrioventricular valve development	1/451	15/10468	0.483687	0.954419	0.954419	ACVR1	1
BP	GO:0003181	atrioventricular valve morphogenesis	1/451	15/10468	0.483687	0.954419	0.954419	ACVR1	1
BP	GO:0003272	endocardial cushion formation	1/451	15/10468	0.483687	0.954419	0.954419	ACVR1	1
BP	GO:0006266	DNA ligation	1/451	15/10468	0.483687	0.954419	0.954419	RAD51	1
BP	GO:0006448	regulation of translational elongation	1/451	15/10468	0.483687	0.954419	0.954419	SRP9	1
BP	GO:0006895	Golgi to endosome transport	1/451	15/10468	0.483687	0.954419	0.954419	SORT1	1
BP	GO:0006978	DNA damage response, signal transduction by p53 class mediator resulting in transcription of p21 class mediator	1/451	15/10468	0.483687	0.954419	0.954419	HIPK2	1
BP	GO:0007076	mitotic chromosome condensation	1/451	15/10468	0.483687	0.954419	0.954419	NUSAP1	1
BP	GO:0007603	phototransduction, visible light	1/451	15/10468	0.483687	0.954419	0.954419	GNAQ	1
BP	GO:0010225	response to UV-C	1/451	15/10468	0.483687	0.954419	0.954419	ERCC5	1
BP	GO:0016082	synaptic vesicle priming	1/451	15/10468	0.483687	0.954419	0.954419	SNAP23	1
BP	GO:0018195	peptidyl-arginine modification	1/451	15/10468	0.483687	0.954419	0.954419	FBXO11	1
BP	GO:0019400	alditol metabolic process	1/451	15/10468	0.483687	0.954419	0.954419	COQ2	1
BP	GO:0021846	cell proliferation in forebrain	1/451	15/10468	0.483687	0.954419	0.954419	PCM1	1
BP	GO:0021895	cerebral cortex neuron differentiation	1/451	15/10468	0.483687	0.954419	0.954419	DLX1	1
BP	GO:0031629	synaptic vesicle fusion to presynaptic active zone membrane	1/451	15/10468	0.483687	0.954419	0.954419	SNAP23	1
BP	GO:0032957	inositol trisphosphate metabolic process	1/451	15/10468	0.483687	0.954419	0.954419	PLCL1	1
BP	GO:0032988	ribonucleoprotein complex disassembly	1/451	15/10468	0.483687	0.954419	0.954419	EIF2D	1
BP	GO:0034501	protein localization to kinetochore	1/451	15/10468	0.483687	0.954419	0.954419	CDT1	1
BP	GO:0035970	peptidyl-threonine dephosphorylation	1/451	15/10468	0.483687	0.954419	0.954419	PPM1F	1
BP	GO:0036119	response to platelet-derived growth factor	1/451	15/10468	0.483687	0.954419	0.954419	HYAL1	1
BP	GO:0036124	histone H3-K9 trimethylation	1/451	15/10468	0.483687	0.954419	0.954419	ARID4B	1
BP	GO:0042454	ribonucleoside catabolic process	1/451	15/10468	0.483687	0.954419	0.954419	HDDC3	1
BP	GO:0042572	retinol metabolic process	1/451	15/10468	0.483687	0.954419	0.954419	DHRS3	1
BP	GO:0046653	tetrahydrofolate metabolic process	1/451	15/10468	0.483687	0.954419	0.954419	MTHFR	1
BP	GO:0046655	folic acid metabolic process	1/451	15/10468	0.483687	0.954419	0.954419	MTHFR	1
BP	GO:0048710	regulation of astrocyte differentiation	1/451	15/10468	0.483687	0.954419	0.954419	HES1	1
BP	GO:0051385	response to mineralocorticoid	1/451	15/10468	0.483687	0.954419	0.954419	FOXO3	1
BP	GO:0051782	negative regulation of cell division	1/451	15/10468	0.483687	0.954419	0.954419	MYC	1
BP	GO:0051882	mitochondrial depolarization	1/451	15/10468	0.483687	0.954419	0.954419	IFI6	1
BP	GO:0060142	regulation of syncytium formation by plasma membrane fusion	1/451	15/10468	0.483687	0.954419	0.954419	MAPK14	1
BP	GO:0060149	negative regulation of posttranscriptional gene silencing	1/451	15/10468	0.483687	0.954419	0.954419	ZC3H10	1
BP	GO:0060487	lung epithelial cell differentiation	1/451	15/10468	0.483687	0.954419	0.954419	AIMP2	1
BP	GO:0060914	heart formation	1/451	15/10468	0.483687	0.954419	0.954419	HES1	1
BP	GO:0060967	negative regulation of gene silencing by RNA	1/451	15/10468	0.483687	0.954419	0.954419	ZC3H10	1
BP	GO:0060972	left/right pattern formation	1/451	15/10468	0.483687	0.954419	0.954419	CITED2	1
BP	GO:0061036	positive regulation of cartilage development	1/451	15/10468	0.483687	0.954419	0.954419	FGF18	1
BP	GO:0070528	protein kinase C signaling	1/451	15/10468	0.483687	0.954419	0.954419	VEGFA	1
BP	GO:0070920	regulation of production of small RNA involved in gene silencing by RNA	1/451	15/10468	0.483687	0.954419	0.954419	ZC3H10	1
BP	GO:0071425	hematopoietic stem cell proliferation	1/451	15/10468	0.483687	0.954419	0.954419	RUNX1	1
BP	GO:0099054	presynapse assembly	1/451	15/10468	0.483687	0.954419	0.954419	LRFN3	1
BP	GO:0099500	vesicle fusion to plasma membrane	1/451	15/10468	0.483687	0.954419	0.954419	SNAP23	1
BP	GO:1901524	regulation of mitophagy	1/451	15/10468	0.483687	0.954419	0.954419	CDC37	1
BP	GO:1902254	negative regulation of intrinsic apoptotic signaling pathway by p53 class mediator	1/451	15/10468	0.483687	0.954419	0.954419	ATAD5	1
BP	GO:1902473	regulation of protein localization to synapse	1/451	15/10468	0.483687	0.954419	0.954419	GPC6	1
BP	GO:2000651	positive regulation of sodium ion transmembrane transporter activity	1/451	15/10468	0.483687	0.954419	0.954419	GLRX	1
BP	GO:2001038	regulation of cellular response to drug	1/451	15/10468	0.483687	0.954419	0.954419	FOXO3	1
BP	GO:0034470	ncRNA processing	15/451	337/10468	0.486452	0.954419	0.954419	MRTO4/RPL11/AGO1/NSUN4/RPS27/INTS7/EXOSC6/ELP6/TRMT10A/THG1L/RPP21/CDKAL1/POP7/METTL2B/EXOSC2	15
BP	GO:0050708	regulation of protein secretion	11/451	245/10468	0.488382	0.954419	0.954419	CD58/ENSA/MPC2/GLUL/DNAJC1/C2CD2L/MIDN/CLOCK/AGER/MAPK14/TNFRSF21	11
BP	GO:0006163	purine nucleotide metabolic process	18/451	407/10468	0.489426	0.954419	0.954419	ACOT7/SDHC/MPC2/HKDC1/ECD/ACAT1/SDHD/ISCU/HDDC3/ACSM3/SULT1A3/SULT1A4/APRT/ALDOC/NUP85/NDUFB7/SEC13/HINT1	18
BP	GO:0034284	response to monosaccharide	6/451	130/10468	0.491136	0.954419	0.954419	ENSA/MPC2/GLUL/C2CD2L/AGER/FOXO3	6
BP	GO:0050714	positive regulation of protein secretion	6/451	130/10468	0.491136	0.954419	0.954419	CD58/MPC2/GLUL/C2CD2L/AGER/MAPK14	6
BP	GO:0006165	nucleoside diphosphate phosphorylation	5/451	107/10468	0.491703	0.954419	0.954419	HKDC1/ECD/ALDOC/NUP85/SEC13	5
BP	GO:0006997	nucleus organization	5/451	107/10468	0.491703	0.954419	0.954419	TMEM170A/PSME4/TMEM43/ATXN7/HIPK2	5
BP	GO:0033002	muscle cell proliferation	5/451	107/10468	0.491703	0.954419	0.954419	TPM1/MAPK14/MYB/ZFPM2/TRIB1	5
BP	GO:0046328	regulation of JNK cascade	5/451	107/10468	0.491703	0.954419	0.954419	MAP4K5/TNIK/AGER/HIPK2/GADD45G	5
BP	GO:0009988	cell-cell recognition	2/451	38/10468	0.491816	0.954419	0.954419	CATSPER2/PCSK4	2
BP	GO:0014855	striated muscle cell proliferation	2/451	38/10468	0.491816	0.954419	0.954419	MAPK14/ZFPM2	2
BP	GO:0030317	flagellated sperm motility	2/451	38/10468	0.491816	0.954419	0.954419	TEKT2/CATSPER2	2
BP	GO:0032515	negative regulation of phosphoprotein phosphatase activity	2/451	38/10468	0.491816	0.954419	0.954419	ENSA/BOD1	2
BP	GO:0040014	regulation of multicellular organism growth	2/451	38/10468	0.491816	0.954419	0.954419	RAI1/SPTBN4	2
BP	GO:0042306	regulation of protein import into nucleus	2/451	38/10468	0.491816	0.954419	0.954419	RBM22/MAPK14	2
BP	GO:0045540	regulation of cholesterol biosynthetic process	2/451	38/10468	0.491816	0.954419	0.954419	GGPS1/SCAP	2
BP	GO:0060135	maternal process involved in female pregnancy	2/451	38/10468	0.491816	0.954419	0.954419	TMED2/EPOR	2
BP	GO:0061178	regulation of insulin secretion involved in cellular response to glucose stimulus	2/451	38/10468	0.491816	0.954419	0.954419	MPC2/C2CD2L	2
BP	GO:0070671	response to interleukin-12	2/451	38/10468	0.491816	0.954419	0.954419	SNRPA1/HSPA9	2
BP	GO:0097722	sperm motility	2/451	38/10468	0.491816	0.954419	0.954419	TEKT2/CATSPER2	2
BP	GO:0106118	regulation of sterol biosynthetic process	2/451	38/10468	0.491816	0.954419	0.954419	GGPS1/SCAP	2
BP	GO:1903670	regulation of sprouting angiogenesis	2/451	38/10468	0.491816	0.954419	0.954419	GLUL/VEGFA	2
BP	GO:0030902	hindbrain development	4/451	84/10468	0.492209	0.954419	0.954419	EN1/PSMG1/HES1/SEC24B	4
BP	GO:0035637	multicellular organismal signaling	4/451	84/10468	0.492209	0.954419	0.954419	RNF207/AHCYL1/YWHAE/SPTBN4	4
BP	GO:0051101	regulation of DNA binding	4/451	84/10468	0.492209	0.954419	0.954419	CDT1/HES1/AGER/HIPK2	4
BP	GO:0071333	cellular response to glucose stimulus	4/451	84/10468	0.492209	0.954419	0.954419	MPC2/C2CD2L/AGER/FOXO3	4
BP	GO:0009306	protein secretion	14/451	316/10468	0.496625	0.954419	0.954419	CD58/ENSA/UBE2Q1/MPC2/GLUL/DNAJC1/C2CD2L/MIDN/OLFM2/CLOCK/MTTP/AGER/MAPK14/TNFRSF21	14
BP	GO:0008064	regulation of actin polymerization or depolymerization	6/451	131/10468	0.49863	0.954419	0.954419	LMOD1/ARPC3/COTL1/PLEKHG2/SPTBN4/CAPG	6
BP	GO:0003013	circulatory system process	11/451	247/10468	0.499338	0.954419	0.954419	RNF207/MTHFR/AHCYL1/NOS1AP/TPM1/ACSM3/YWHAE/SPTBN4/AGER/VEGFA/IMMP2L	11
BP	GO:0090305	nucleic acid phosphodiester bond hydrolysis	11/451	247/10468	0.499338	0.954419	0.954419	AGO1/FEN1/ERCC5/EXOSC6/ATAD5/ANKLE1/ZFP36/RPP21/PMS2/POP7/EXOSC2	11
BP	GO:0019827	stem cell population maintenance	5/451	108/10468	0.499957	0.954419	0.954419	ZFP36L2/MED15/HES1/FOXO3/PCM1	5
BP	GO:0044773	mitotic DNA damage checkpoint	4/451	85/10468	0.501518	0.954419	0.954419	CLSPN/PLK3/ATM/ARID3A	4
BP	GO:0070125	mitochondrial translational elongation	4/451	85/10468	0.501518	0.954419	0.954419	DAP3/MRPL49/MRPL38/MRPS33	4
BP	GO:0071156	regulation of cell cycle arrest	4/451	85/10468	0.501518	0.954419	0.954419	PLK3/ATM/CRLF3/ARID3A	4
BP	GO:0071326	cellular response to monosaccharide stimulus	4/451	85/10468	0.501518	0.954419	0.954419	MPC2/C2CD2L/AGER/FOXO3	4
BP	GO:0071331	cellular response to hexose stimulus	4/451	85/10468	0.501518	0.954419	0.954419	MPC2/C2CD2L/AGER/FOXO3	4
BP	GO:0042692	muscle cell differentiation	9/451	201/10468	0.501567	0.954419	0.954419	SORT1/LMOD1/BNIP2/TPM1/OLFM2/ACVR1/HES1/MAPK14/VEGFA	9
BP	GO:0002687	positive regulation of leukocyte migration	3/451	62/10468	0.503411	0.954419	0.954419	AGER/MAPK14/VEGFA	3
BP	GO:0006110	regulation of glycolytic process	3/451	62/10468	0.503411	0.954419	0.954419	ECD/NUP85/SEC13	3
BP	GO:0033047	regulation of mitotic sister chromatid segregation	3/451	62/10468	0.503411	0.954419	0.954419	ATM/CDT1/CDC6	3
BP	GO:0048013	ephrin receptor signaling pathway	3/451	62/10468	0.503411	0.954419	0.954419	ARPC3/AP2S1/EFNB1	3
BP	GO:1900182	positive regulation of protein localization to nucleus	3/451	62/10468	0.503411	0.954419	0.954419	KAT7/RBM22/MAPK14	3
BP	GO:1901879	regulation of protein depolymerization	3/451	62/10468	0.503411	0.954419	0.954419	LMOD1/SPTBN4/CAPG	3
BP	GO:1903051	negative regulation of proteolysis involved in cellular protein catabolic process	3/451	62/10468	0.503411	0.954419	0.954419	RPL11/CAMLG/HIPK2	3
BP	GO:1903510	mucopolysaccharide metabolic process	3/451	62/10468	0.503411	0.954419	0.954419	CHSY1/HYAL1/EGFLAM	3
BP	GO:1903747	regulation of establishment of protein localization to mitochondrion	3/451	62/10468	0.503411	0.954419	0.954419	YWHAE/NPEPPS/SAE1	3
BP	GO:0032259	methylation	12/451	271/10468	0.503591	0.954419	0.954419	MTHFR/NSUN4/ARID4B/COMTD1/PWP1/SETD1A/FBXO11/TRMT10A/MYB/METTL2B/MYC/PHF19	12
BP	GO:0007131	reciprocal meiotic recombination	2/451	39/10468	0.505672	0.954419	0.954419	ATM/RAD51	2
BP	GO:0030239	myofibril assembly	2/451	39/10468	0.505672	0.954419	0.954419	LMOD1/TPM1	2
BP	GO:0031050	dsRNA processing	2/451	39/10468	0.505672	0.954419	0.954419	AGO1/ZC3H10	2
BP	GO:0035019	somatic stem cell population maintenance	2/451	39/10468	0.505672	0.954419	0.954419	ZFP36L2/HES1	2
BP	GO:0045010	actin nucleation	2/451	39/10468	0.505672	0.954419	0.954419	LMOD1/ARPC3	2
BP	GO:0046209	nitric oxide metabolic process	2/451	39/10468	0.505672	0.954419	0.954419	NOS1AP/SPR	2
BP	GO:0048008	platelet-derived growth factor receptor signaling pathway	2/451	39/10468	0.505672	0.954419	0.954419	TIPARP/VEGFA	2
BP	GO:0060415	muscle tissue morphogenesis	2/451	39/10468	0.505672	0.954419	0.954419	TPM1/ZFPM2	2
BP	GO:0060420	regulation of heart growth	2/451	39/10468	0.505672	0.954419	0.954419	MAPK14/ZFPM2	2
BP	GO:0061647	histone H3-K9 modification	2/451	39/10468	0.505672	0.954419	0.954419	ARID4B/MYB	2
BP	GO:0070918	production of small RNA involved in gene silencing by RNA	2/451	39/10468	0.505672	0.954419	0.954419	AGO1/ZC3H10	2
BP	GO:0090503	RNA phosphodiester bond hydrolysis, exonucleolytic	2/451	39/10468	0.505672	0.954419	0.954419	EXOSC6/EXOSC2	2
BP	GO:0000963	mitochondrial RNA processing	1/451	16/10468	0.505964	0.954419	0.954419	TRMT10A	1
BP	GO:0003091	renal water homeostasis	1/451	16/10468	0.505964	0.954419	0.954419	PRKAR2A	1
BP	GO:0003382	epithelial cell morphogenesis	1/451	16/10468	0.505964	0.954419	0.954419	SIPA1L3	1
BP	GO:0006144	purine nucleobase metabolic process	1/451	16/10468	0.505964	0.954419	0.954419	APRT	1
BP	GO:0006337	nucleosome disassembly	1/451	16/10468	0.505964	0.954419	0.954419	SMARCC2	1
BP	GO:0006775	fat-soluble vitamin metabolic process	1/451	16/10468	0.505964	0.954419	0.954419	CYP2R1	1
BP	GO:0007221	positive regulation of transcription of Notch receptor target	1/451	16/10468	0.505964	0.954419	0.954419	MAML2	1
BP	GO:0009067	aspartate family amino acid biosynthetic process	1/451	16/10468	0.505964	0.954419	0.954419	MTHFR	1
BP	GO:0009110	vitamin biosynthetic process	1/451	16/10468	0.505964	0.954419	0.954419	CYP2R1	1
BP	GO:0010831	positive regulation of myotube differentiation	1/451	16/10468	0.505964	0.954419	0.954419	MAPK14	1
BP	GO:0010869	regulation of receptor biosynthetic process	1/451	16/10468	0.505964	0.954419	0.954419	SCAP	1
BP	GO:0019098	reproductive behavior	1/451	16/10468	0.505964	0.954419	0.954419	UBE2Q1	1
BP	GO:0021904	dorsal/ventral neural tube patterning	1/451	16/10468	0.505964	0.954419	0.954419	GPR161	1
BP	GO:0032633	interleukin-4 production	1/451	16/10468	0.505964	0.954419	0.954419	CEBPB	1
BP	GO:0032770	positive regulation of monooxygenase activity	1/451	16/10468	0.505964	0.954419	0.954419	NOS1AP	1
BP	GO:0035024	negative regulation of Rho protein signal transduction	1/451	16/10468	0.505964	0.954419	0.954419	SCAI	1
BP	GO:0035268	protein mannosylation	1/451	16/10468	0.505964	0.954419	0.954419	SDF2L1	1
BP	GO:0036474	cell death in response to hydrogen peroxide	1/451	16/10468	0.505964	0.954419	0.954419	FOXO3	1
BP	GO:0038084	vascular endothelial growth factor signaling pathway	1/451	16/10468	0.505964	0.954419	0.954419	VEGFA	1
BP	GO:0040019	positive regulation of embryonic development	1/451	16/10468	0.505964	0.954419	0.954419	HES1	1
BP	GO:0042533	tumor necrosis factor biosynthetic process	1/451	16/10468	0.505964	0.954419	0.954419	AGER	1
BP	GO:0042534	regulation of tumor necrosis factor biosynthetic process	1/451	16/10468	0.505964	0.954419	0.954419	AGER	1
BP	GO:0042772	DNA damage response, signal transduction resulting in transcription	1/451	16/10468	0.505964	0.954419	0.954419	HIPK2	1
BP	GO:0043371	negative regulation of CD4-positive, alpha-beta T cell differentiation	1/451	16/10468	0.505964	0.954419	0.954419	RUNX1	1
BP	GO:0045624	positive regulation of T-helper cell differentiation	1/451	16/10468	0.505964	0.954419	0.954419	MYB	1
BP	GO:0048048	embryonic eye morphogenesis	1/451	16/10468	0.505964	0.954419	0.954419	HIPK2	1
BP	GO:0048854	brain morphogenesis	1/451	16/10468	0.505964	0.954419	0.954419	FOXO3	1
BP	GO:0050687	negative regulation of defense response to virus	1/451	16/10468	0.505964	0.954419	0.954419	MICB	1
BP	GO:0050855	regulation of B cell receptor signaling pathway	1/451	16/10468	0.505964	0.954419	0.954419	RUNX1	1
BP	GO:0051444	negative regulation of ubiquitin-protein transferase activity	1/451	16/10468	0.505964	0.954419	0.954419	RPL11	1
BP	GO:0060479	lung cell differentiation	1/451	16/10468	0.505964	0.954419	0.954419	AIMP2	1
BP	GO:0070286	axonemal dynein complex assembly	1/451	16/10468	0.505964	0.954419	0.954419	TEKT2	1
BP	GO:1901522	positive regulation of transcription from RNA polymerase II promoter involved in cellular response to chemical stimulus	1/451	16/10468	0.505964	0.954419	0.954419	VEGFA	1
BP	GO:1903392	negative regulation of adherens junction organization	1/451	16/10468	0.505964	0.954419	0.954419	VEGFA	1
BP	GO:2000269	regulation of fibroblast apoptotic process	1/451	16/10468	0.505964	0.954419	0.954419	STK17A	1
BP	GO:2000352	negative regulation of endothelial cell apoptotic process	1/451	16/10468	0.505964	0.954419	0.954419	PAK4	1
BP	GO:0007254	JNK cascade	6/451	132/10468	0.506086	0.954419	0.954419	MAP4K5/TNIK/AGER/HIPK2/TRIB1/GADD45G	6
BP	GO:0030832	regulation of actin filament length	6/451	132/10468	0.506086	0.954419	0.954419	LMOD1/ARPC3/COTL1/PLEKHG2/SPTBN4/CAPG	6
BP	GO:0046939	nucleotide phosphorylation	5/451	109/10468	0.508158	0.954419	0.954419	HKDC1/ECD/ALDOC/NUP85/SEC13	5
BP	GO:0098727	maintenance of cell number	5/451	109/10468	0.508158	0.954419	0.954419	ZFP36L2/MED15/HES1/FOXO3/PCM1	5
BP	GO:0031960	response to corticosteroid	4/451	86/10468	0.510753	0.954419	0.954419	ZFP36/ZFP36L2/FOXO3/GNRH1	4
BP	GO:0070126	mitochondrial translational termination	4/451	86/10468	0.510753	0.954419	0.954419	DAP3/MRPL49/MRPL38/MRPS33	4
BP	GO:1901568	fatty acid derivative metabolic process	4/451	86/10468	0.510753	0.954419	0.954419	ACOT7/ACAT1/CYP2S1/TBXAS1	4
BP	GO:0050890	cognition	7/451	156/10468	0.511211	0.954419	0.954419	EIF4EBP2/FEN1/MEIS2/EN1/CEBPB/AGER/VDAC3	7
BP	GO:0072593	reactive oxygen species metabolic process	7/451	156/10468	0.511211	0.954419	0.954419	IFI6/NOS1AP/SPR/MAPK14/FOXO3/STK17A/IMMP2L	7
BP	GO:0002697	regulation of immune effector process	10/451	226/10468	0.511826	0.954419	0.954419	ZNF683/GPRC5B/EXOSC6/ATAD5/ELMOD2/AGER/MICB/MAPK14/MYB/ULBP2	10
BP	GO:0003015	heart process	6/451	133/10468	0.513501	0.954419	0.954419	RNF207/AHCYL1/NOS1AP/TPM1/YWHAE/SPTBN4	6
BP	GO:1903362	regulation of cellular protein catabolic process	9/451	203/10468	0.513613	0.954419	0.954419	RPL11/PLK3/PKD1/TRIB2/CAMLG/MYLIP/HIPK2/RNF139/TRIB1	9
BP	GO:0051347	positive regulation of transferase activity	19/451	436/10468	0.513853	0.954419	0.954419	CLSPN/MARK2/CCND2/AJUBA/MAP4K5/PKD1/GPRC5B/CDC6/RPTOR/PAK4/SPDYA/PRKAR2A/TNIK/FGF18/AGER/MAPK14/VEGFA/MYC/GADD45G	19
BP	GO:0030811	regulation of nucleotide catabolic process	3/451	63/10468	0.514212	0.954419	0.954419	ECD/NUP85/SEC13	3
BP	GO:0032436	positive regulation of proteasomal ubiquitin-dependent protein catabolic process	3/451	63/10468	0.514212	0.954419	0.954419	PLK3/TRIB2/TRIB1	3
BP	GO:0035270	endocrine system development	3/451	63/10468	0.514212	0.954419	0.954419	HES1/CLOCK/CITED2	3
BP	GO:0006754	ATP biosynthetic process	5/451	110/10468	0.516306	0.954419	0.954419	HKDC1/ECD/ALDOC/NUP85/SEC13	5
BP	GO:0052547	regulation of peptidase activity	10/451	227/10468	0.517511	0.954419	0.954419	RPS6KA1/IFI6/YWHAE/PSME4/PPM1F/AGER/PSMB8/MAPK14/VEGFA/MYC	10
BP	GO:0043161	proteasome-mediated ubiquitin-dependent protein catabolic process	16/451	367/10468	0.517675	0.954419	0.954419	FBXO2/FBXO44/RPL11/PLK3/HECTD3/CUL5/HERC2/PSMD3/SMURF2/TRIB2/PSME4/CLOCK/CAMLG/PSMB8/TRIB1/UBE2R2	16
BP	GO:0002088	lens development in camera-type eye	2/451	40/10468	0.519281	0.954419	0.954419	CRYGS/HIPK2	2
BP	GO:0030032	lamellipodium assembly	2/451	40/10468	0.519281	0.954419	0.954419	AJUBA/NUP85	2
BP	GO:0031648	protein destabilization	2/451	40/10468	0.519281	0.954419	0.954419	MYLIP/RNF139	2
BP	GO:0033048	negative regulation of mitotic sister chromatid segregation	2/451	40/10468	0.519281	0.954419	0.954419	ATM/CDT1	2
BP	GO:0035825	homologous recombination	2/451	40/10468	0.519281	0.954419	0.954419	ATM/RAD51	2
BP	GO:0046323	glucose import	2/451	40/10468	0.519281	0.954419	0.954419	SORT1/MAPK14	2
BP	GO:0048708	astrocyte differentiation	2/451	40/10468	0.519281	0.954419	0.954419	HES1/AGER	2
BP	GO:0050434	positive regulation of viral transcription	2/451	40/10468	0.519281	0.954419	0.954419	SUPT5H/ZNF639	2
BP	GO:0098659	inorganic cation import across plasma membrane	2/451	40/10468	0.519281	0.954419	0.954419	ISCU/FAM155A	2
BP	GO:0099587	inorganic ion import across plasma membrane	2/451	40/10468	0.519281	0.954419	0.954419	ISCU/FAM155A	2
BP	GO:1904589	regulation of protein import	2/451	40/10468	0.519281	0.954419	0.954419	RBM22/MAPK14	2
BP	GO:2001057	reactive nitrogen species metabolic process	2/451	40/10468	0.519281	0.954419	0.954419	NOS1AP/SPR	2
BP	GO:1900180	regulation of protein localization to nucleus	4/451	87/10468	0.51991	0.954419	0.954419	GLUL/KAT7/RBM22/MAPK14	4
BP	GO:2000134	negative regulation of G1/S transition of mitotic cell cycle	4/451	87/10468	0.51991	0.954419	0.954419	PLK3/ATM/BRD7/ARID3A	4
BP	GO:0030162	regulation of proteolysis	20/451	461/10468	0.520795	0.954419	0.954419	RPL11/RPS6KA1/IFI6/PLK3/DNAJC1/SART3/PKD1/YWHAE/TRIB2/PSME4/PPM1F/CAMLG/AGER/PSMB8/MAPK14/VEGFA/HIPK2/RNF139/TRIB1/MYC	20
BP	GO:0031647	regulation of protein stability	10/451	228/10468	0.523176	0.954419	0.954419	RPL11/IFT46/NAPG/NCLN/CDC37/USP34/CAMLG/MYLIP/RNF139/GNAQ	10
BP	GO:0044706	multi-multicellular organism process	5/451	111/10468	0.524397	0.954419	0.954419	UBE2Q1/TMED2/SMURF2/EPOR/GNRH1	5
BP	GO:0016052	carbohydrate catabolic process	7/451	158/10468	0.524817	0.954419	0.954419	HKDC1/ECD/ALDOC/NUP85/SEC13/PPP1R3B/IDNK	7
BP	GO:0006513	protein monoubiquitination	3/451	64/10468	0.524887	0.954419	0.954419	DTL/ATXN7L3/UBE2R2	3
BP	GO:0060048	cardiac muscle contraction	3/451	64/10468	0.524887	0.954419	0.954419	RNF207/NOS1AP/TPM1	3
BP	GO:0001522	pseudouridine synthesis	1/451	17/10468	0.527281	0.954419	0.954419	TRUB2	1
BP	GO:0001556	oocyte maturation	1/451	17/10468	0.527281	0.954419	0.954419	FOXO3	1
BP	GO:0001662	behavioral fear response	1/451	17/10468	0.527281	0.954419	0.954419	VDAC3	1
BP	GO:0002675	positive regulation of acute inflammatory response	1/451	17/10468	0.527281	0.954419	0.954419	PTGER3	1
BP	GO:0002686	negative regulation of leukocyte migration	1/451	17/10468	0.527281	0.954419	0.954419	NBL1	1
BP	GO:0006817	phosphate ion transport	1/451	17/10468	0.527281	0.954419	0.954419	CEBPB	1
BP	GO:0007340	acrosome reaction	1/451	17/10468	0.527281	0.954419	0.954419	PCSK4	1
BP	GO:0007549	dosage compensation	1/451	17/10468	0.527281	0.954419	0.954419	XIST	1
BP	GO:0009048	dosage compensation by inactivation of X chromosome	1/451	17/10468	0.527281	0.954419	0.954419	XIST	1
BP	GO:0010863	positive regulation of phospholipase C activity	1/451	17/10468	0.527281	0.954419	0.954419	GNAQ	1
BP	GO:0016254	preassembly of GPI anchor in ER membrane	1/451	17/10468	0.527281	0.954419	0.954419	PIGZ	1
BP	GO:0018230	peptidyl-L-cysteine S-palmitoylation	1/451	17/10468	0.527281	0.954419	0.954419	ZDHHC19	1
BP	GO:0018231	peptidyl-S-diacylglycerol-L-cysteine biosynthetic process from peptidyl-cysteine	1/451	17/10468	0.527281	0.954419	0.954419	ZDHHC19	1
BP	GO:0031498	chromatin disassembly	1/451	17/10468	0.527281	0.954419	0.954419	SMARCC2	1
BP	GO:0032069	regulation of nuclease activity	1/451	17/10468	0.527281	0.954419	0.954419	NEIL1	1
BP	GO:0032743	positive regulation of interleukin-2 production	1/451	17/10468	0.527281	0.954419	0.954419	RUNX1	1
BP	GO:0032800	receptor biosynthetic process	1/451	17/10468	0.527281	0.954419	0.954419	SCAP	1
BP	GO:0034162	toll-like receptor 9 signaling pathway	1/451	17/10468	0.527281	0.954419	0.954419	EPG5	1
BP	GO:0040018	positive regulation of multicellular organism growth	1/451	17/10468	0.527281	0.954419	0.954419	SPTBN4	1
BP	GO:0042417	dopamine metabolic process	1/451	17/10468	0.527281	0.954419	0.954419	SULT1A3	1
BP	GO:0042451	purine nucleoside biosynthetic process	1/451	17/10468	0.527281	0.954419	0.954419	APRT	1
BP	GO:0042462	eye photoreceptor cell development	1/451	17/10468	0.527281	0.954419	0.954419	VEGFA	1
BP	GO:0042596	fear response	1/451	17/10468	0.527281	0.954419	0.954419	VDAC3	1
BP	GO:0042759	long-chain fatty acid biosynthetic process	1/451	17/10468	0.527281	0.954419	0.954419	ACOT7	1
BP	GO:0043114	regulation of vascular permeability	1/451	17/10468	0.527281	0.954419	0.954419	VEGFA	1
BP	GO:0043923	positive regulation by host of viral transcription	1/451	17/10468	0.527281	0.954419	0.954419	ZNF639	1
BP	GO:0044058	regulation of digestive system process	1/451	17/10468	0.527281	0.954419	0.954419	PTGER3	1
BP	GO:0044319	wound healing, spreading of cells	1/451	17/10468	0.527281	0.954419	0.954419	AJUBA	1
BP	GO:0045649	regulation of macrophage differentiation	1/451	17/10468	0.527281	0.954419	0.954419	TRIB1	1
BP	GO:0045947	negative regulation of translational initiation	1/451	17/10468	0.527281	0.954419	0.954419	EIF4EBP2	1
BP	GO:0046129	purine ribonucleoside biosynthetic process	1/451	17/10468	0.527281	0.954419	0.954419	APRT	1
BP	GO:0046426	negative regulation of JAK-STAT cascade	1/451	17/10468	0.527281	0.954419	0.954419	PARP14	1
BP	GO:0050982	detection of mechanical stimulus	1/451	17/10468	0.527281	0.954419	0.954419	PKD1	1
BP	GO:0051932	synaptic transmission, GABAergic	1/451	17/10468	0.527281	0.954419	0.954419	PLCL1	1
BP	GO:0060216	definitive hemopoiesis	1/451	17/10468	0.527281	0.954419	0.954419	ZFP36L2	1
BP	GO:0061311	cell surface receptor signaling pathway involved in heart development	1/451	17/10468	0.527281	0.954419	0.954419	ACVR1	1
BP	GO:0071467	cellular response to pH	1/451	17/10468	0.527281	0.954419	0.954419	HYAL1	1
BP	GO:0090505	epiboly involved in wound healing	1/451	17/10468	0.527281	0.954419	0.954419	AJUBA	1
BP	GO:0099172	presynapse organization	1/451	17/10468	0.527281	0.954419	0.954419	LRFN3	1
BP	GO:1904893	negative regulation of STAT cascade	1/451	17/10468	0.527281	0.954419	0.954419	PARP14	1
BP	GO:1905521	regulation of macrophage migration	1/451	17/10468	0.527281	0.954419	0.954419	MAPK14	1
BP	GO:0043086	negative regulation of catalytic activity	21/451	486/10468	0.527402	0.954419	0.954419	RPL11/RPS6KA1/IFI6/SPOCD1/SORT1/ENSA/TMED2/AJUBA/NEIL1/YWHAE/RPTOR/MIDN/ZFP36/TRIB2/PPM1F/PRKAR2A/BOD1/VEGFA/PRKRIP1/TRIB1/GNAQ	21
BP	GO:0006836	neurotransmitter transport	6/451	135/10468	0.528204	0.954419	0.954419	GLUL/VPS18/SNAP23/PIP5K1C/GAD1/SLC36A1	6
BP	GO:0099003	vesicle-mediated transport in synapse	6/451	135/10468	0.528204	0.954419	0.954419	VPS18/SNAP23/AP3S2/AP3D1/PIP5K1C/POTEKP	6
BP	GO:0007269	neurotransmitter secretion	4/451	88/10468	0.528985	0.954419	0.954419	VPS18/SNAP23/PIP5K1C/GAD1	4
BP	GO:0009566	fertilization	4/451	88/10468	0.528985	0.954419	0.954419	UBE2Q1/CATSPER2/PCSK4/SPTBN4	4
BP	GO:0071346	cellular response to interferon-gamma	4/451	88/10468	0.528985	0.954419	0.954419	CD58/CDC37/PARP14/HLA-DPB1	4
BP	GO:0099643	signal release from synapse	4/451	88/10468	0.528985	0.954419	0.954419	VPS18/SNAP23/PIP5K1C/GAD1	4
BP	GO:0030098	lymphocyte differentiation	9/451	206/10468	0.531508	0.954419	0.954419	RPL22/ZNF683/IRF2BP2/ATM/TYRO3/AP3D1/ZFP36L2/RUNX1/MYB	9
BP	GO:0019693	ribose phosphate metabolic process	18/451	417/10468	0.531962	0.954419	0.954419	ACOT7/SDHC/MPC2/HKDC1/ECD/ACAT1/SDHD/ISCU/HDDC3/ACSM3/SULT1A3/SULT1A4/APRT/ALDOC/NUP85/NDUFB7/SEC13/HINT1	18
BP	GO:0009135	purine nucleoside diphosphate metabolic process	5/451	112/10468	0.53243	0.954419	0.954419	HKDC1/ECD/ALDOC/NUP85/SEC13	5
BP	GO:0009179	purine ribonucleoside diphosphate metabolic process	5/451	112/10468	0.53243	0.954419	0.954419	HKDC1/ECD/ALDOC/NUP85/SEC13	5
BP	GO:0019359	nicotinamide nucleotide biosynthetic process	5/451	112/10468	0.53243	0.954419	0.954419	HKDC1/ECD/ALDOC/NUP85/SEC13	5
BP	GO:0019363	pyridine nucleotide biosynthetic process	5/451	112/10468	0.53243	0.954419	0.954419	HKDC1/ECD/ALDOC/NUP85/SEC13	5
BP	GO:0007631	feeding behavior	2/451	41/10468	0.532638	0.954419	0.954419	UBE2Q1/EN1	2
BP	GO:0014015	positive regulation of gliogenesis	2/451	41/10468	0.532638	0.954419	0.954419	HES1/MYB	2
BP	GO:0033046	negative regulation of sister chromatid segregation	2/451	41/10468	0.532638	0.954419	0.954419	ATM/CDT1	2
BP	GO:0034121	regulation of toll-like receptor signaling pathway	2/451	41/10468	0.532638	0.954419	0.954419	TYRO3/LRRC14	2
BP	GO:0034308	primary alcohol metabolic process	2/451	41/10468	0.532638	0.954419	0.954419	DHRS3/SULT1A3	2
BP	GO:0044070	regulation of anion transport	2/451	41/10468	0.532638	0.954419	0.954419	AHCYL1/CEBPB	2
BP	GO:0051653	spindle localization	2/451	41/10468	0.532638	0.954419	0.954419	NUSAP1/LLGL1	2
BP	GO:0051785	positive regulation of nuclear division	2/451	41/10468	0.532638	0.954419	0.954419	NUSAP1/CDT1	2
BP	GO:0051893	regulation of focal adhesion assembly	2/451	41/10468	0.532638	0.954419	0.954419	PPM1F/VEGFA	2
BP	GO:0051985	negative regulation of chromosome segregation	2/451	41/10468	0.532638	0.954419	0.954419	ATM/CDT1	2
BP	GO:0070192	chromosome organization involved in meiotic cell cycle	2/451	41/10468	0.532638	0.954419	0.954419	ATM/RAD51	2
BP	GO:0090109	regulation of cell-substrate junction assembly	2/451	41/10468	0.532638	0.954419	0.954419	PPM1F/VEGFA	2
BP	GO:1902369	negative regulation of RNA catabolic process	2/451	41/10468	0.532638	0.954419	0.954419	ZFP36/MAPK14	2
BP	GO:0035690	cellular response to drug	10/451	230/10468	0.534442	0.954419	0.954419	RAD51/SULT1A3/RHOB/PPM1F/RBM22/MAPK13/FOXO3/MYB/MYC/GNAQ	10
BP	GO:0045861	negative regulation of proteolysis	8/451	183/10468	0.534614	0.954419	0.954419	RPL11/RPS6KA1/IFI6/DNAJC1/YWHAE/CAMLG/VEGFA/HIPK2	8
BP	GO:0001843	neural tube closure	3/451	65/10468	0.535431	0.954419	0.954419	MTHFR/TMED2/SEC24B	3
BP	GO:0007613	memory	3/451	65/10468	0.535431	0.954419	0.954419	EIF4EBP2/FEN1/CEBPB	3
BP	GO:0043648	dicarboxylic acid metabolic process	3/451	65/10468	0.535431	0.954419	0.954419	MTHFR/GLUL/GAD1	3
BP	GO:0048010	vascular endothelial growth factor receptor signaling pathway	3/451	65/10468	0.535431	0.954419	0.954419	FGF18/MAPK14/VEGFA	3
BP	GO:0060606	tube closure	3/451	65/10468	0.535431	0.954419	0.954419	MTHFR/TMED2/SEC24B	3
BP	GO:1901606	alpha-amino acid catabolic process	3/451	65/10468	0.535431	0.954419	0.954419	GLUL/ACAT1/GAD1	3
BP	GO:0002793	positive regulation of peptide secretion	6/451	136/10468	0.535487	0.954419	0.954419	CD58/MPC2/GLUL/C2CD2L/AGER/MAPK14	6
BP	GO:0007088	regulation of mitotic nuclear division	6/451	136/10468	0.535487	0.954419	0.954419	MKI67/ATM/NUSAP1/CDT1/CDC6/STAG1	6
BP	GO:0031047	gene silencing by RNA	6/451	136/10468	0.535487	0.954419	0.954419	AGO1/ZC3H10/AJUBA/NUP85/ZFP36/SEC13	6
BP	GO:0002685	regulation of leukocyte migration	4/451	89/10468	0.537976	0.954419	0.954419	NBL1/AGER/MAPK14/VEGFA	4
BP	GO:1902807	negative regulation of cell cycle G1/S phase transition	4/451	89/10468	0.537976	0.954419	0.954419	PLK3/ATM/BRD7/ARID3A	4
BP	GO:0045088	regulation of innate immune response	12/451	278/10468	0.539749	0.954419	0.954419	SFPQ/PSPC1/TYRO3/PSMD3/EPG5/CDC37/PSME4/PARP14/PSMB8/MICB/ULBP2/LRRC14	12
BP	GO:0051606	detection of stimulus	5/451	113/10468	0.5404	0.954419	0.954419	DTL/PKD1/REEP6/RRH/GNAQ	5
BP	GO:0002791	regulation of peptide secretion	11/451	255/10468	0.542507	0.954419	0.954419	CD58/ENSA/MPC2/GLUL/DNAJC1/C2CD2L/MIDN/CLOCK/AGER/MAPK14/TNFRSF21	11
BP	GO:0006164	purine nucleotide biosynthetic process	9/451	208/10468	0.543309	0.954419	0.954419	ACOT7/MPC2/HKDC1/ECD/ACAT1/APRT/ALDOC/NUP85/SEC13	9
BP	GO:0002690	positive regulation of leukocyte chemotaxis	2/451	42/10468	0.545739	0.954419	0.954419	MAPK14/VEGFA	2
BP	GO:0035065	regulation of histone acetylation	2/451	42/10468	0.545739	0.954419	0.954419	BRD7/KAT7	2
BP	GO:0055117	regulation of cardiac muscle contraction	2/451	42/10468	0.545739	0.954419	0.954419	RNF207/NOS1AP	2
BP	GO:0061014	positive regulation of mRNA catabolic process	2/451	42/10468	0.545739	0.954419	0.954419	ZFP36/ZFP36L2	2
BP	GO:0061912	selective autophagy	2/451	42/10468	0.545739	0.954419	0.954419	CDC37/WDFY3	2
BP	GO:1901019	regulation of calcium ion transmembrane transporter activity	2/451	42/10468	0.545739	0.954419	0.954419	NOS1AP/YWHAE	2
BP	GO:0002456	T cell mediated immunity	3/451	66/10468	0.545843	0.954419	0.954419	AGER/MICB/ULBP2	3
BP	GO:0016064	immunoglobulin mediated immune response	3/451	66/10468	0.545843	0.954419	0.954419	UNG/EXOSC6/ATAD5	3
BP	GO:0016079	synaptic vesicle exocytosis	3/451	66/10468	0.545843	0.954419	0.954419	VPS18/SNAP23/PIP5K1C	3
BP	GO:0016575	histone deacetylation	3/451	66/10468	0.545843	0.954419	0.954419	SFPQ/C6orf89/VEGFA	3
BP	GO:0048706	embryonic skeletal system development	3/451	66/10468	0.545843	0.954419	0.954419	HSD17B7/DLX1/HYAL1	3
BP	GO:0072089	stem cell proliferation	3/451	66/10468	0.545843	0.954419	0.954419	ARTN/RUNX1/VEGFA	3
[truncated: 2,680 more rows]

## Sheet: SHS
ONTOLOGY	ID	Description	GeneRatio	BgRatio	pvalue	p.adjust	qvalue	geneID	Count
BP	GO:0001541	ovarian follicle development	7/494	37/10468	0.00149733	0.957229	0.957229	ATM/ICAM1/CEBPB/VEGFA/FOXO3/IMMP2L/GNRH1	7
BP	GO:0046660	female sex differentiation	10/494	74/10468	0.00237231	0.957229	0.957229	ATM/TYRO3/ICAM1/CEBPB/TIPARP/VEGFA/FOXO3/IMMP2L/GNRH1/ZFPM2	10
BP	GO:0045598	regulation of fat cell differentiation	10/494	76/10468	0.0028984	0.957229	0.957229	SORT1/ZFP36/TRIB2/ZFP36L2/CEBPB/HES1/MAPK14/TAF8/LPL/ZFPM2	10
BP	GO:0008585	female gonad development	9/494	64/10468	0.00293572	0.957229	0.957229	ATM/ICAM1/CEBPB/TIPARP/VEGFA/FOXO3/IMMP2L/GNRH1/ZFPM2	9
BP	GO:2000736	regulation of stem cell differentiation	11/494	91/10468	0.00358909	0.957229	0.957229	PWP1/SETD1A/PSMD3/ZFP36L2/PSME4/PSMF1/RUNX1/HES1/HSPA9/PSMB8/MYB	11
BP	GO:0046545	development of primary female sexual characteristics	9/494	66/10468	0.00363096	0.957229	0.957229	ATM/ICAM1/CEBPB/TIPARP/VEGFA/FOXO3/IMMP2L/GNRH1/ZFPM2	9
BP	GO:0044818	mitotic G2/M transition checkpoint	5/494	24/10468	0.00462333	0.957229	0.957229	CLSPN/ORC1/ATM/CDC6/NBN	5
BP	GO:0000082	G1/S transition of mitotic cell cycle	19/494	211/10468	0.00517042	0.957229	0.957229	PLK3/ORC1/ECD/NPAT/ATM/CCND2/PKD1/BRD7/CDT1/CRLF3/CDC6/RPTOR/ARID3A/SPDYA/ACVR1/HYAL1/CCND3/PRIM2/MYC	19
BP	GO:0045444	fat cell differentiation	14/494	138/10468	0.00555161	0.957229	0.957229	SORT1/GRK5/SOCS1/ZFP36/TRIB2/ZFP36L2/CEBPB/HES1/PSMB8/MAPK14/TAF8/ARL4A/LPL/ZFPM2	14
BP	GO:0045737	positive regulation of cyclin-dependent protein serine/threonine kinase activity	5/494	25/10468	0.00555907	0.957229	0.957229	CCND2/PKD1/CDC6/SPDYA/CCND3	5
BP	GO:0000076	DNA replication checkpoint	4/494	16/10468	0.00566598	0.957229	0.957229	CLSPN/ORC1/CDT1/CDC6	4
BP	GO:0098609	cell-cell adhesion	30/494	394/10468	0.00654707	0.957229	0.957229	PTPRF/CD58/ROBO3/AJUBA/TYRO3/PKD1/SOCS1/PIEZO1/AP3D1/PIP5K1C/PTPRS/ICAM1/LRFN3/PAK4/ACVR1/CEBPB/RUNX1/PPM1F/HES1/BLOC1S4/AGER/HLA-DPB1/MAPK14/VEGFA/TNFRSF21/CD164/MYB/CITED2/GNRH1/EFNB1	30
BP	GO:0030514	negative regulation of BMP signaling pathway	5/494	26/10468	0.00662089	0.957229	0.957229	NBL1/SMURF2/DAND5/DLX1/HIPK2	5
BP	GO:0090092	regulation of transmembrane receptor protein serine/threonine kinase signaling pathway	13/494	127/10468	0.00686585	0.957229	0.957229	NBL1/BAMBI/CDKN1C/GDF11/RNF111/SMURF2/DAND5/LTBP1/ACVR1/DLX1/HES1/CITED2/HIPK2	13
BP	GO:0018209	peptidyl-serine modification	19/494	217/10468	0.00695534	0.957229	0.957229	CLSPN/MARK2/ATM/PWP1/TTBK2/PKD1/SMG1/TLK2/RPTOR/SPTBN4/PLCL1/PPM1F/EGFLAM/MAPK14/MAPK13/VEGFA/HIPK2/PKN3/NTMT1	19
BP	GO:1902750	negative regulation of cell cycle G2/M phase transition	10/494	87/10468	0.00767022	0.957229	0.957229	CLSPN/ORC1/DTL/ATM/PSMD3/CDC6/PSME4/PSMF1/PSMB8/NBN	10
BP	GO:0035459	cargo loading into vesicle	4/494	18/10468	0.0088399	0.957229	0.957229	TMED2/SEC23A/SEC13/SEC24B	4
BP	GO:1904031	positive regulation of cyclin-dependent protein kinase activity	5/494	28/10468	0.00915538	0.957229	0.957229	CCND2/PKD1/CDC6/SPDYA/CCND3	5
BP	GO:1901532	regulation of hematopoietic progenitor cell differentiation	9/494	76/10468	0.00923808	0.957229	0.957229	SETD1A/PSMD3/PSME4/PSMF1/RUNX1/HES1/HSPA9/PSMB8/MYB	9
BP	GO:0044843	cell cycle G1/S phase transition	19/494	224/10468	0.00964019	0.957229	0.957229	PLK3/ORC1/ECD/NPAT/ATM/CCND2/PKD1/BRD7/CDT1/CRLF3/CDC6/RPTOR/ARID3A/SPDYA/ACVR1/HYAL1/CCND3/PRIM2/MYC	19
BP	GO:0033314	mitotic DNA replication checkpoint	3/494	10/10468	0.00977563	0.957229	0.957229	CLSPN/ORC1/CDC6	3
BP	GO:0072170	metanephric tubule development	3/494	10/10468	0.00977563	0.957229	0.957229	ACAT1/PKD1/HES1	3
BP	GO:0072234	metanephric nephron tubule development	3/494	10/10468	0.00977563	0.957229	0.957229	ACAT1/PKD1/HES1	3
BP	GO:1900409	positive regulation of cellular response to oxidative stress	3/494	10/10468	0.00977563	0.957229	0.957229	SFPQ/MCL1/FOXO3	3
BP	GO:1902884	positive regulation of response to oxidative stress	3/494	10/10468	0.00977563	0.957229	0.957229	SFPQ/MCL1/FOXO3	3
BP	GO:1903209	positive regulation of oxidative stress-induced cell death	3/494	10/10468	0.00977563	0.957229	0.957229	SFPQ/MCL1/FOXO3	3
BP	GO:0098742	cell-cell adhesion via plasma-membrane adhesion molecules	10/494	91/10468	0.0104313	0.957229	0.957229	PTPRF/ROBO3/AJUBA/PKD1/PTPRS/ICAM1/LRFN3/ACVR1/MAPK14/CD164	10
BP	GO:0010972	negative regulation of G2/M transition of mitotic cell cycle	9/494	78/10468	0.010889	0.957229	0.957229	CLSPN/ORC1/ATM/PSMD3/CDC6/PSME4/PSMF1/PSMB8/NBN	9
BP	GO:1903844	regulation of cellular response to transforming growth factor beta stimulus	9/494	78/10468	0.010889	0.957229	0.957229	BAMBI/CDKN1C/RNF111/SMURF2/DAND5/LTBP1/DLX1/CITED2/HIPK2	9
BP	GO:0022407	regulation of cell-cell adhesion	18/494	211/10468	0.0109465	0.957229	0.957229	SOCS1/PIEZO1/AP3D1/ICAM1/LRFN3/CEBPB/RUNX1/PPM1F/HES1/AGER/HLA-DPB1/MAPK14/VEGFA/TNFRSF21/MYB/CITED2/GNRH1/EFNB1	18
BP	GO:1902036	regulation of hematopoietic stem cell differentiation	8/494	65/10468	0.0110206	0.957229	0.957229	SETD1A/PSMD3/PSME4/PSMF1/RUNX1/HSPA9/PSMB8/MYB	8
BP	GO:2000027	regulation of animal organ morphogenesis	14/494	151/10468	0.011954	0.957229	0.957229	RNF207/GPC6/PSMD3/SMURF2/AP2S1/PSME4/ACVR1/PSMF1/HES1/SEC24B/PSMB8/VEGFA/CITED2/MYC	14
BP	GO:1900087	positive regulation of G1/S transition of mitotic cell cycle	5/494	30/10468	0.0122892	0.957229	0.957229	CCND2/CDC6/RPTOR/HYAL1/CCND3	5
BP	GO:0061458	reproductive system development	21/494	262/10468	0.0123676	0.957229	0.957229	UBE2Q1/ARID4B/CDKN1C/ATM/TMED2/TYRO3/PKD1/BPTF/ICAM1/EPOR/HS6ST1/CEBPB/TIPARP/HES1/MAPK14/VEGFA/FOXO3/CITED2/IMMP2L/GNRH1/ZFPM2	21
BP	GO:1901136	carbohydrate derivative catabolic process	12/494	122/10468	0.0124406	0.957229	0.957229	ACOT7/FBXO2/FBXO44/NPL/ACAT1/UNG/GPC6/NEIL1/HDDC3/DCTPP1/HYAL1/HINT1	12
BP	GO:0050926	regulation of positive chemotaxis	3/494	11/10468	0.0129765	0.957229	0.957229	ARTN/AGER/VEGFA	3
BP	GO:0050927	positive regulation of positive chemotaxis	3/494	11/10468	0.0129765	0.957229	0.957229	ARTN/AGER/VEGFA	3
BP	GO:0072243	metanephric nephron epithelium development	3/494	11/10468	0.0129765	0.957229	0.957229	ACAT1/PKD1/HES1	3
BP	GO:1905939	regulation of gonad development	3/494	11/10468	0.0129765	0.957229	0.957229	CITED2/GNRH1/ZFPM2	3
BP	GO:0009154	purine ribonucleotide catabolic process	4/494	20/10468	0.0129915	0.957229	0.957229	ACOT7/ACAT1/HDDC3/HINT1	4
BP	GO:0045785	positive regulation of cell adhesion	18/494	216/10468	0.0136941	0.957229	0.957229	ATM/TPM1/SOCS1/PIEZO1/AP3D1/ICAM1/RUNX1/PPM1F/HYAL1/HES1/EGFLAM/AGER/HLA-DPB1/VEGFA/MYB/CITED2/COL26A1/EFNB1	18
BP	GO:0002200	somatic diversification of immune receptors	7/494	55/10468	0.0142506	0.957229	0.957229	ATM/UNG/EXOSC6/ATAD5/PMS2/PMS2P1/NBN	7
BP	GO:0044772	mitotic cell cycle phase transition	34/494	488/10468	0.0144586	0.957229	0.957229	CLSPN/PLK3/ORC1/ENSA/DTL/ECD/CDKN1C/NPAT/ATM/CCND2/AJUBA/PKD1/BRD7/CDT1/YWHAE/CRLF3/ATAD5/PSMD3/CDC6/RPTOR/ARID3A/SPDYA/ZFP36L2/PSME4/ACVR1/PSMF1/HYAL1/CEP70/PSMB8/CCND3/PRIM2/PCM1/NBN/MYC	34
BP	GO:0003151	outflow tract morphogenesis	6/494	43/10468	0.0148076	0.957229	0.957229	DHRS3/HES1/SEC24B/VEGFA/CITED2/ZFPM2	6
BP	GO:0009261	ribonucleotide catabolic process	4/494	21/10468	0.015463	0.957229	0.957229	ACOT7/ACAT1/HDDC3/HINT1	4
BP	GO:0090101	negative regulation of transmembrane receptor protein serine/threonine kinase signaling pathway	8/494	69/10468	0.0155132	0.957229	0.957229	NBL1/BAMBI/SMURF2/DAND5/LTBP1/ACVR1/DLX1/HIPK2	8
BP	GO:0001892	embryonic placenta development	7/494	56/10468	0.0156461	0.957229	0.957229	CDKN1C/TMED2/PKD1/BPTF/HS6ST1/CEBPB/HES1	7
BP	GO:0045787	positive regulation of cell cycle	22/494	285/10468	0.0158847	0.957229	0.957229	SFPQ/PLK3/DTL/FEN1/ATM/CCND2/MEIS2/NUSAP1/PKD1/CDT1/CRLF3/ATAD5/CDC6/RPTOR/ARID3A/SPDYA/HYAL1/HES1/UBE2B/C6orf89/CCND3/CITED2	22
BP	GO:0018105	peptidyl-serine phosphorylation	17/494	204/10468	0.0162985	0.957229	0.957229	CLSPN/MARK2/ATM/PWP1/TTBK2/PKD1/SMG1/TLK2/RPTOR/SPTBN4/PLCL1/PPM1F/MAPK14/MAPK13/VEGFA/HIPK2/PKN3	17
BP	GO:0030510	regulation of BMP signaling pathway	6/494	44/10468	0.0164836	0.957229	0.957229	NBL1/SMURF2/DAND5/DLX1/HES1/HIPK2	6
BP	GO:1902275	regulation of chromatin organization	13/494	142/10468	0.0166408	0.957229	0.957229	MTHFR/MKI67/ATM/SART3/SETD1A/BRD7/KAT7/TLK2/UBE2B/C6orf89/VEGFA/MYB/PHF19	13
BP	GO:0009223	pyrimidine deoxyribonucleotide catabolic process	3/494	12/10468	0.016705	0.957229	0.957229	UNG/NEIL1/DCTPP1	3
BP	GO:0072207	metanephric epithelium development	3/494	12/10468	0.016705	0.957229	0.957229	ACAT1/PKD1/HES1	3
BP	GO:0086013	membrane repolarization during cardiac muscle cell action potential	3/494	12/10468	0.016705	0.957229	0.957229	RNF207/NOS1AP/YWHAE	3
BP	GO:0030511	positive regulation of transforming growth factor beta receptor signaling pathway	4/494	22/10468	0.0182111	0.957229	0.957229	CDKN1C/RNF111/CITED2/HIPK2	4
BP	GO:0060674	placenta blood vessel development	4/494	22/10468	0.0182111	0.957229	0.957229	TMED2/PKD1/HS6ST1/HES1	4
BP	GO:1903524	positive regulation of blood circulation	4/494	22/10468	0.0182111	0.957229	0.957229	RNF207/NOS1AP/TPM1/ICAM1	4
BP	GO:1903846	positive regulation of cellular response to transforming growth factor beta stimulus	4/494	22/10468	0.0182111	0.957229	0.957229	CDKN1C/RNF111/CITED2/HIPK2	4
BP	GO:0051705	multi-organism behavior	5/494	33/10468	0.0182369	0.957229	0.957229	UBE2Q1/EIF4EBP2/EN1/GAD1/PCM1	5
BP	GO:0090287	regulation of cellular response to growth factor stimulus	13/494	145/10468	0.019475	0.957229	0.957229	NBL1/BAMBI/CDKN1C/RNF111/SMURF2/DAND5/LTBP1/DLX1/HES1/FGF18/VEGFA/CITED2/HIPK2	13
BP	GO:0031058	positive regulation of histone modification	8/494	72/10468	0.0196602	0.957229	0.957229	ATM/SART3/BRD7/KAT7/C6orf89/VEGFA/MYB/PHF19	8
BP	GO:0060218	hematopoietic stem cell differentiation	8/494	72/10468	0.0196602	0.957229	0.957229	SETD1A/PSMD3/PSME4/PSMF1/RUNX1/HSPA9/PSMB8/MYB	8
BP	GO:0007548	sex differentiation	14/494	161/10468	0.019969	0.957229	0.957229	ARID4B/CYP17A1/ATM/TYRO3/PKD1/ICAM1/CEBPB/TIPARP/VEGFA/FOXO3/CITED2/IMMP2L/GNRH1/ZFPM2	14
BP	GO:0003006	developmental process involved in reproduction	27/494	377/10468	0.0200802	0.957229	0.957229	ARID4B/CYP17A1/CDKN1C/ATM/TMED2/TYRO3/CATSPER2/PKD1/BPTF/PCSK4/ICAM1/EPOR/PSME4/HS6ST1/ACVR1/CEBPB/TIPARP/HES1/UBE2B/MAPK14/VEGFA/FOXO3/CITED2/IMMP2L/TTC26/GNRH1/ZFPM2	27
BP	GO:0003281	ventricular septum development	6/494	46/10468	0.0202185	0.957229	0.957229	DAND5/LTBP1/ACVR1/HES1/CITED2/ZFPM2	6
BP	GO:0035050	embryonic heart tube development	6/494	46/10468	0.0202185	0.957229	0.957229	RNF207/TMED2/TBX6/ACVR1/HES1/CITED2	6
BP	GO:1903706	regulation of hemopoiesis	23/494	309/10468	0.0204725	0.957229	0.957229	ZNF683/AGO1/MEIS2/SOCS1/SETD1A/PSMD3/TNRC6C/AP3D1/ZFP36/ZFP36L2/PSME4/PSMF1/CEBPB/RUNX1/HES1/HSPA9/AGER/PSMB8/MAPK14/FOXO3/MYB/TRIB1/MYC	23
BP	GO:0006270	DNA replication initiation	5/494	34/10468	0.0205768	0.957229	0.957229	ORC1/CDT1/CDC6/PRIM2/NBN	5
BP	GO:0048608	reproductive structure development	20/494	259/10468	0.020784	0.957229	0.957229	ARID4B/CDKN1C/ATM/TMED2/TYRO3/PKD1/BPTF/ICAM1/EPOR/HS6ST1/CEBPB/TIPARP/HES1/MAPK14/VEGFA/FOXO3/CITED2/IMMP2L/GNRH1/ZFPM2	20
BP	GO:0006244	pyrimidine nucleotide catabolic process	3/494	13/10468	0.0209691	0.957229	0.957229	UNG/NEIL1/DCTPP1	3
BP	GO:0035278	miRNA mediated inhibition of translation	3/494	13/10468	0.0209691	0.957229	0.957229	AGO1/TNRC6C/ZFP36	3
BP	GO:0040033	negative regulation of translation, ncRNA-mediated	3/494	13/10468	0.0209691	0.957229	0.957229	AGO1/TNRC6C/ZFP36	3
BP	GO:0045974	regulation of translation, ncRNA-mediated	3/494	13/10468	0.0209691	0.957229	0.957229	AGO1/TNRC6C/ZFP36	3
BP	GO:0086011	membrane repolarization during action potential	3/494	13/10468	0.0209691	0.957229	0.957229	RNF207/NOS1AP/YWHAE	3
BP	GO:0051168	nuclear export	15/494	178/10468	0.0211645	0.957229	0.957229	SRRM1/AHCYL1/PKD1/SMG1/YWHAE/NUP85/ANKLE1/POLDIP3/SEC13/LSG1/SDAD1/HSPA9/RBM22/CCHCR1/XPO7	15
BP	GO:0007498	mesoderm development	8/494	73/10468	0.0212029	0.957229	0.957229	EXT2/GDF11/TBX6/DAND5/ACVR1/VEGFA/CITED2/ZFPM2	8
BP	GO:0031572	G2 DNA damage checkpoint	4/494	23/10468	0.021244	0.957229	0.957229	CLSPN/DTL/ATM/NBN	4
BP	GO:0071479	cellular response to ionizing radiation	7/494	60/10468	0.0222016	0.957229	0.957229	INTS7/ATM/RAD51/TLK2/RHOB/CLOCK/MAPK14	7
BP	GO:1901990	regulation of mitotic cell cycle phase transition	26/494	363/10468	0.0222261	0.957229	0.957229	CLSPN/PLK3/ORC1/DTL/ECD/CDKN1C/ATM/CCND2/PKD1/BRD7/CDT1/YWHAE/ATAD5/PSMD3/CDC6/RPTOR/ARID3A/ZFP36L2/PSME4/PSMF1/HYAL1/CEP70/PSMB8/CCND3/PCM1/NBN	26
BP	GO:0007062	sister chromatid cohesion	6/494	47/10468	0.0222853	0.957229	0.957229	SFPQ/FEN1/STAG1/PDS5A/BOD1/STAG3L2	6
BP	GO:0016445	somatic diversification of immunoglobulins	6/494	47/10468	0.0222853	0.957229	0.957229	UNG/EXOSC6/ATAD5/PMS2/PMS2P1/NBN	6
BP	GO:0006611	protein export from nucleus	14/494	164/10468	0.0230257	0.957229	0.957229	SRRM1/AHCYL1/PKD1/SMG1/YWHAE/NUP85/ANKLE1/POLDIP3/SEC13/SDAD1/HSPA9/RBM22/CCHCR1/XPO7	14
BP	GO:0009314	response to radiation	23/494	313/10468	0.0233909	0.957229	0.957229	PLK3/DTL/INTS7/CYP2R1/FEN1/RBM4B/ATM/ERCC5/MEIS2/RAD51/TLK2/REEP6/ICAM1/RHOB/DYNLRB1/HYAL1/CLOCK/RRH/UBE2B/MAPK14/MAPK13/MYC/GNAQ	23
BP	GO:0050918	positive chemotaxis	4/494	24/10468	0.0245681	0.957229	0.957229	ARTN/ROBO3/AGER/VEGFA	4
BP	GO:0007095	mitotic G2 DNA damage checkpoint	3/494	14/10468	0.0257718	0.957229	0.957229	CLSPN/ATM/NBN	3
BP	GO:0016446	somatic hypermutation of immunoglobulin genes	3/494	14/10468	0.0257718	0.957229	0.957229	UNG/PMS2/PMS2P1	3
BP	GO:0045823	positive regulation of heart contraction	3/494	14/10468	0.0257718	0.957229	0.957229	RNF207/NOS1AP/TPM1	3
BP	GO:0060716	labyrinthine layer blood vessel development	3/494	14/10468	0.0257718	0.957229	0.957229	TMED2/HS6ST1/HES1	3
BP	GO:0090110	cargo loading into COPII-coated vesicle	3/494	14/10468	0.0257718	0.957229	0.957229	SEC23A/SEC13/SEC24B	3
BP	GO:0017015	regulation of transforming growth factor beta receptor signaling pathway	8/494	76/10468	0.0263424	0.957229	0.957229	BAMBI/CDKN1C/RNF111/SMURF2/DAND5/LTBP1/CITED2/HIPK2	8
BP	GO:0002683	negative regulation of immune system process	19/494	249/10468	0.0265614	0.957229	0.957229	NBL1/ATM/MEIS2/TYRO3/SOCS1/PTPRS/ZFP36/CEBPB/RUNX1/PARP14/HES1/HSPA9/LST1/MICB/TNFRSF21/GNRH1/TRIB1/MYC/LRRC14	19
BP	GO:0001890	placenta development	9/494	91/10468	0.0274518	0.957229	0.957229	CDKN1C/TMED2/PKD1/BPTF/EPOR/HS6ST1/CEBPB/HES1/MAPK14	9
BP	GO:0036293	response to decreased oxygen levels	19/494	250/10468	0.0275372	0.957229	0.957229	MTHFR/PLK3/ATM/AJUBA/PSMD3/ICAM1/PSME4/PSMF1/ADSL/SCAP/CPEB4/AGER/PSMB8/VEGFA/FOXO3/MYB/CITED2/HIPK2/MYC	19
BP	GO:0051984	positive regulation of chromosome segregation	4/494	25/10468	0.0281889	0.957229	0.957229	SFPQ/FEN1/CDT1/CDC6	4
BP	GO:0030155	regulation of cell adhesion	26/494	371/10468	0.028215	0.957229	0.957229	ATM/TPM1/PKD1/SOCS1/PIEZO1/AP3D1/ICAM1/LRFN3/CEBPB/RUNX1/PPM1F/PLXNB1/HYAL1/HES1/EGFLAM/AGER/HLA-DPB1/MAPK14/VEGFA/TNFRSF21/CD164/MYB/CITED2/COL26A1/GNRH1/EFNB1	26
BP	GO:0090100	positive regulation of transmembrane receptor protein serine/threonine kinase signaling pathway	7/494	63/10468	0.0282192	0.957229	0.957229	CDKN1C/GDF11/RNF111/ACVR1/HES1/CITED2/HIPK2	7
BP	GO:0002566	somatic diversification of immune receptors via somatic mutation	3/494	15/10468	0.0311118	0.957229	0.957229	UNG/PMS2/PMS2P1	3
BP	GO:0006555	methionine metabolic process	3/494	15/10468	0.0311118	0.957229	0.957229	MTHFR/AHCYL1/AHCYL2	3
BP	GO:0046500	S-adenosylmethionine metabolic process	3/494	15/10468	0.0311118	0.957229	0.957229	MTHFR/AHCYL1/AHCYL2	3
BP	GO:0060306	regulation of membrane repolarization	3/494	15/10468	0.0311118	0.957229	0.957229	RNF207/NOS1AP/YWHAE	3
BP	GO:0099116	tRNA 5'-end processing	3/494	15/10468	0.0311118	0.957229	0.957229	THG1L/RPP21/POP7	3
BP	GO:0071356	cellular response to tumor necrosis factor	14/494	171/10468	0.0315027	0.957229	0.957229	CD58/PSMD3/ICAM1/ZFP36/ZFP36L2/PSME4/PSMF1/SPATA2/HYAL1/LTB/PSMB8/MAPK14/TNFRSF21/FOXO3	14
BP	GO:0061326	renal tubule development	5/494	38/10468	0.0318579	0.957229	0.957229	ACAT1/PKD1/HES1/VEGFA/MYC	5
BP	GO:0072080	nephron tubule development	5/494	38/10468	0.0318579	0.957229	0.957229	ACAT1/PKD1/HES1/VEGFA/MYC	5
BP	GO:0035176	social behavior	4/494	26/10468	0.0321103	0.957229	0.957229	EIF4EBP2/EN1/GAD1/PCM1	4
BP	GO:0051703	intraspecies interaction between organisms	4/494	26/10468	0.0321103	0.957229	0.957229	EIF4EBP2/EN1/GAD1/PCM1	4
BP	GO:0060412	ventricular septum morphogenesis	4/494	26/10468	0.0321103	0.957229	0.957229	ACVR1/HES1/CITED2/ZFPM2	4
BP	GO:1901989	positive regulation of cell cycle phase transition	8/494	79/10468	0.0322907	0.957229	0.957229	DTL/CCND2/CDT1/ATAD5/CDC6/RPTOR/HYAL1/CCND3	8
BP	GO:0031570	DNA integrity checkpoint	12/494	140/10468	0.0328502	0.957229	0.957229	CLSPN/PLK3/ORC1/DTL/INTS7/ATM/CDT1/CDC6/ARID3A/CLOCK/MAPK14/NBN	12
BP	GO:0050670	regulation of lymphocyte proliferation	10/494	109/10468	0.0328645	0.957229	0.957229	ATM/ATAD5/CEBPB/HES1/LST1/AGER/HLA-DPB1/TNFRSF21/GNRH1/EFNB1	10
BP	GO:0002244	hematopoietic progenitor cell differentiation	11/494	125/10468	0.0339323	0.957229	0.957229	SETD1A/PSMD3/EEF2/SIPA1L3/PSME4/PSMF1/RUNX1/HES1/HSPA9/PSMB8/MYB	11
BP	GO:0002474	antigen processing and presentation of peptide antigen via MHC class I	8/494	80/10468	0.0344616	0.957229	0.957229	SEC23A/SNAP23/PSMD3/PSME4/PSMF1/SEC13/SEC24B/PSMB8	8
BP	GO:0032944	regulation of mononuclear cell proliferation	10/494	110/10468	0.0346946	0.957229	0.957229	ATM/ATAD5/CEBPB/HES1/LST1/AGER/HLA-DPB1/TNFRSF21/GNRH1/EFNB1	10
BP	GO:0001666	response to hypoxia	18/494	240/10468	0.0351051	0.957229	0.957229	MTHFR/PLK3/ATM/AJUBA/PSMD3/ICAM1/PSME4/PSMF1/ADSL/SCAP/AGER/PSMB8/VEGFA/FOXO3/MYB/CITED2/HIPK2/MYC	18
BP	GO:0051249	regulation of lymphocyte activation	18/494	240/10468	0.0351051	0.957229	0.957229	ZNF683/ATM/TYRO3/SOCS1/EXOSC6/ATAD5/AP3D1/ZFP36L2/CEBPB/RUNX1/HES1/LST1/AGER/HLA-DPB1/TNFRSF21/MYB/GNRH1/EFNB1	18
BP	GO:0060411	cardiac septum morphogenesis	5/494	39/10468	0.035178	0.957229	0.957229	DHRS3/ACVR1/HES1/CITED2/ZFPM2	5
BP	GO:1902808	positive regulation of cell cycle G1/S phase transition	5/494	39/10468	0.035178	0.957229	0.957229	CCND2/CDC6/RPTOR/HYAL1/CCND3	5
BP	GO:0003279	cardiac septum development	7/494	66/10468	0.0352556	0.957229	0.957229	DHRS3/DAND5/LTBP1/ACVR1/HES1/CITED2/ZFPM2	7
BP	GO:1901992	positive regulation of mitotic cell cycle phase transition	7/494	66/10468	0.0352556	0.957229	0.957229	DTL/CCND2/CDT1/CDC6/RPTOR/HYAL1/CCND3	7
BP	GO:0036294	cellular response to decreased oxygen levels	13/494	158/10468	0.036076	0.957229	0.957229	PLK3/AJUBA/PSMD3/ICAM1/PSME4/PSMF1/CPEB4/PSMB8/VEGFA/FOXO3/CITED2/HIPK2/MYC	13
BP	GO:0009166	nucleotide catabolic process	12/494	142/10468	0.036082	0.957229	0.957229	ACOT7/HKDC1/ECD/ACAT1/UNG/NEIL1/HDDC3/DCTPP1/ALDOC/NUP85/SEC13/HINT1	12
BP	GO:0000083	regulation of transcription involved in G1/S transition of mitotic cell cycle	4/494	27/10468	0.0363352	0.957229	0.957229	ORC1/NPAT/CDT1/CDC6	4
BP	GO:0034035	purine ribonucleoside bisphosphate metabolic process	3/494	16/10468	0.0369839	0.957229	0.957229	HDDC3/SULT1A3/SULT1A4	3
BP	GO:0034312	diol biosynthetic process	3/494	16/10468	0.0369839	0.957229	0.957229	ASAH2B/SPR/PCBD2	3
BP	GO:0097150	neuronal stem cell population maintenance	3/494	16/10468	0.0369839	0.957229	0.957229	HES1/FOXO3/PCM1	3
BP	GO:2000737	negative regulation of stem cell differentiation	3/494	16/10468	0.0369839	0.957229	0.957229	ZFP36L2/HES1/HSPA9	3
BP	GO:2000045	regulation of G1/S transition of mitotic cell cycle	11/494	127/10468	0.0374681	0.957229	0.957229	PLK3/ECD/ATM/CCND2/PKD1/BRD7/CDC6/RPTOR/ARID3A/HYAL1/CCND3	11
BP	GO:0001656	metanephros development	5/494	40/10468	0.0387042	0.957229	0.957229	ACAT1/GDF11/PKD1/HES1/MYC	5
BP	GO:0001885	endothelial cell development	5/494	40/10468	0.0387042	0.957229	0.957229	GSTM3/PTPRS/ICAM1/VEGFA/RAP2C	5
BP	GO:0003143	embryonic heart tube morphogenesis	5/494	40/10468	0.0387042	0.957229	0.957229	RNF207/TMED2/TBX6/ACVR1/HES1	5
BP	GO:0032945	negative regulation of mononuclear cell proliferation	5/494	40/10468	0.0387042	0.957229	0.957229	ATM/CEBPB/LST1/TNFRSF21/GNRH1	5
BP	GO:0050672	negative regulation of lymphocyte proliferation	5/494	40/10468	0.0387042	0.957229	0.957229	ATM/CEBPB/LST1/TNFRSF21/GNRH1	5
BP	GO:0006903	vesicle targeting	8/494	82/10468	0.0390957	0.957229	0.957229	TMED2/SEC23A/SNAP23/GOSR1/WIPI1/SEC13/TBC1D23/SEC24B	8
BP	GO:0051250	negative regulation of lymphocyte activation	8/494	82/10468	0.0390957	0.957229	0.957229	ATM/TYRO3/SOCS1/CEBPB/RUNX1/LST1/TNFRSF21/GNRH1	8
BP	GO:0003205	cardiac chamber development	9/494	97/10468	0.0391981	0.957229	0.957229	DHRS3/TPM1/TBX6/DAND5/LTBP1/ACVR1/HES1/CITED2/ZFPM2	9
BP	GO:1905330	regulation of morphogenesis of an epithelium	10/494	113/10468	0.0406088	0.957229	0.957229	RNF207/GPC6/PSMD3/SMURF2/AP2S1/PSME4/PSMF1/SEC24B/PSMB8/VEGFA	10
BP	GO:0045599	negative regulation of fat cell differentiation	4/494	28/10468	0.0408652	0.957229	0.957229	SORT1/TRIB2/ZFP36L2/ZFPM2	4
BP	GO:0090175	regulation of establishment of planar polarity	8/494	83/10468	0.0415617	0.957229	0.957229	GPC6/PSMD3/SMURF2/AP2S1/PSME4/PSMF1/SEC24B/PSMB8	8
BP	GO:1905269	positive regulation of chromatin organization	8/494	83/10468	0.0415617	0.957229	0.957229	ATM/SART3/BRD7/KAT7/C6orf89/VEGFA/MYB/PHF19	8
BP	GO:1901987	regulation of cell cycle phase transition	26/494	385/10468	0.041582	0.957229	0.957229	CLSPN/PLK3/ORC1/DTL/ECD/CDKN1C/ATM/CCND2/PKD1/BRD7/CDT1/YWHAE/ATAD5/PSMD3/CDC6/RPTOR/ARID3A/ZFP36L2/PSME4/PSMF1/HYAL1/CEP70/PSMB8/CCND3/PCM1/NBN	26
BP	GO:0048568	embryonic organ development	18/494	246/10468	0.0430707	0.957229	0.957229	RNF207/CDKN1C/TMED2/PKD1/TBX6/BPTF/EN1/HS6ST1/ACVR1/CEBPB/HYAL1/TBC1D23/HES1/SEC24B/VEGFA/CITED2/HIPK2/ZFPM2	18
BP	GO:0031954	positive regulation of protein autophosphorylation	3/494	17/10468	0.0433796	0.957229	0.957229	VEGFA/NBN/RAP2C	3
BP	GO:0048490	anterograde synaptic vesicle transport	3/494	17/10468	0.0433796	0.957229	0.957229	AP3S2/AP3D1/BLOC1S4	3
BP	GO:0099514	synaptic vesicle cytoskeletal transport	3/494	17/10468	0.0433796	0.957229	0.957229	AP3S2/AP3D1/BLOC1S4	3
BP	GO:0099517	synaptic vesicle transport along microtubule	3/494	17/10468	0.0433796	0.957229	0.957229	AP3S2/AP3D1/BLOC1S4	3
BP	GO:0099622	cardiac muscle cell membrane repolarization	3/494	17/10468	0.0433796	0.957229	0.957229	RNF207/NOS1AP/YWHAE	3
BP	GO:1900151	regulation of nuclear-transcribed mRNA catabolic process, deadenylation-dependent decay	3/494	17/10468	0.0433796	0.957229	0.957229	TNRC6C/ZFP36/ZFP36L2	3
BP	GO:1900153	positive regulation of nuclear-transcribed mRNA catabolic process, deadenylation-dependent decay	3/494	17/10468	0.0433796	0.957229	0.957229	TNRC6C/ZFP36/ZFP36L2	3
BP	GO:1904646	cellular response to amyloid-beta	3/494	17/10468	0.0433796	0.957229	0.957229	ICAM1/AGER/FOXO3	3
BP	GO:0031056	regulation of histone modification	10/494	115/10468	0.0449151	0.957229	0.957229	MTHFR/ATM/SART3/BRD7/KAT7/UBE2B/C6orf89/VEGFA/MYB/PHF19	10
BP	GO:0070663	regulation of leukocyte proliferation	10/494	115/10468	0.0449151	0.957229	0.957229	ATM/ATAD5/CEBPB/HES1/LST1/AGER/HLA-DPB1/TNFRSF21/GNRH1/EFNB1	10
BP	GO:1901292	nucleoside phosphate catabolic process	12/494	147/10468	0.0451345	0.957229	0.957229	ACOT7/HKDC1/ECD/ACAT1/UNG/NEIL1/HDDC3/DCTPP1/ALDOC/NUP85/SEC13/HINT1	12
BP	GO:2001252	positive regulation of chromosome organization	12/494	147/10468	0.0451345	0.957229	0.957229	SFPQ/FEN1/ATM/SART3/BRD7/CDT1/KAT7/C6orf89/VEGFA/MYB/NBN/PHF19	12
BP	GO:0003158	endothelium development	7/494	70/10468	0.0463155	0.957229	0.957229	GSTM3/PTPRS/ICAM1/RHOB/ACVR1/VEGFA/RAP2C	7
BP	GO:0035335	peptidyl-tyrosine dephosphorylation	7/494	70/10468	0.0463155	0.957229	0.957229	PTPRF/DUSP23/DUSP13/PTPN21/SSH2/PTPRS/PTPRH	7
BP	GO:1903707	negative regulation of hemopoiesis	8/494	85/10468	0.0467982	0.957229	0.957229	MEIS2/SOCS1/ZFP36/RUNX1/HES1/HSPA9/TRIB1/MYC	8
BP	GO:0071456	cellular response to hypoxia	12/494	148/10468	0.0471178	0.957229	0.957229	PLK3/AJUBA/PSMD3/ICAM1/PSME4/PSMF1/PSMB8/VEGFA/FOXO3/CITED2/HIPK2/MYC	12
BP	GO:0046165	alcohol biosynthetic process	10/494	116/10468	0.0471802	0.957229	0.957229	HSD17B7/LBR/GGPS1/ASAH2B/CYP2R1/SPR/PLCL1/SCAP/PCBD2/CYP51A1	10
BP	GO:0090068	positive regulation of cell cycle process	16/494	215/10468	0.0478794	0.957229	0.957229	SFPQ/PLK3/DTL/FEN1/ATM/CCND2/NUSAP1/CDT1/CRLF3/ATAD5/CDC6/RPTOR/ARID3A/HYAL1/UBE2B/CCND3	16
BP	GO:0033044	regulation of chromosome organization	20/494	284/10468	0.0479264	0.957229	0.957229	MTHFR/SFPQ/MKI67/FEN1/ATM/SART3/SMG1/SETD1A/BRD7/CDT1/CDC6/KAT7/TLK2/UBE2B/C6orf89/VEGFA/MYB/NBN/MYC/PHF19	20
BP	GO:0048863	stem cell differentiation	13/494	165/10468	0.0483449	0.957229	0.957229	PWP1/SETD1A/PSMD3/ZFP36L2/PSME4/ACVR1/PSMF1/RUNX1/HES1/HSPA9/PSMB8/MYB/EFNB1	13
BP	GO:0070482	response to oxygen levels	19/494	267/10468	0.0485544	0.957229	0.957229	MTHFR/PLK3/ATM/AJUBA/PSMD3/ICAM1/PSME4/PSMF1/ADSL/SCAP/CPEB4/AGER/PSMB8/VEGFA/FOXO3/MYB/CITED2/HIPK2/MYC	19
BP	GO:0046649	lymphocyte activation	26/494	391/10468	0.0485663	0.957229	0.957229	RPL22/ZNF683/IRF2BP2/ATM/UNG/TYRO3/SOCS1/EXOSC6/ATAD5/AP3D1/ICAM1/ZFP36L2/CEBPB/RUNX1/HES1/LST1/AGER/HLA-DPB1/MICB/CCND3/TNFRSF21/MYB/ULBP2/GNRH1/NBN/EFNB1	26
BP	GO:0009264	deoxyribonucleotide catabolic process	3/494	18/10468	0.0502875	0.957229	0.957229	UNG/NEIL1/DCTPP1	3
BP	GO:0032799	low-density lipoprotein receptor particle metabolic process	3/494	18/10468	0.0502875	0.957229	0.957229	AP2S1/SCAP/MYLIP	3
BP	GO:0034311	diol metabolic process	3/494	18/10468	0.0502875	0.957229	0.957229	ASAH2B/SPR/PCBD2	3
BP	GO:0034471	ncRNA 5'-end processing	3/494	18/10468	0.0502875	0.957229	0.957229	THG1L/RPP21/POP7	3
BP	GO:0036507	protein demannosylation	3/494	18/10468	0.0502875	0.957229	0.957229	UGGT1/MAN1A1/RNF139	3
BP	GO:0036508	protein alpha-1,2-demannosylation	3/494	18/10468	0.0502875	0.957229	0.957229	UGGT1/MAN1A1/RNF139	3
BP	GO:1901099	negative regulation of signal transduction in absence of ligand	3/494	18/10468	0.0502875	0.957229	0.957229	IFI6/MCL1/UNC5B	3
BP	GO:1904645	response to amyloid-beta	3/494	18/10468	0.0502875	0.957229	0.957229	ICAM1/AGER/FOXO3	3
BP	GO:2001240	negative regulation of extrinsic apoptotic signaling pathway in absence of ligand	3/494	18/10468	0.0502875	0.957229	0.957229	IFI6/MCL1/UNC5B	3
BP	GO:0042632	cholesterol homeostasis	5/494	43/10468	0.0505368	0.957229	0.957229	ACSM3/MTTP/MYLIP/LPL/ABCA2	5
BP	GO:0070664	negative regulation of leukocyte proliferation	5/494	43/10468	0.0505368	0.957229	0.957229	ATM/CEBPB/LST1/TNFRSF21/GNRH1	5
BP	GO:0006195	purine nucleotide catabolic process	4/494	30/10468	0.0508409	0.957229	0.957229	ACOT7/ACAT1/HDDC3/HINT1	4
BP	GO:0061028	establishment of endothelial barrier	4/494	30/10468	0.0508409	0.957229	0.957229	PTPRS/ICAM1/VEGFA/RAP2C	4
BP	GO:0072006	nephron development	6/494	57/10468	0.0509986	0.957229	0.957229	ACAT1/PKD1/NUP85/HES1/VEGFA/MYC	6
BP	GO:0048469	cell maturation	9/494	102/10468	0.0512838	0.957229	0.957229	CDKN1C/GDF11/CATSPER2/TBX6/PCSK4/SPTBN4/HES1/VEGFA/FOXO3	9
BP	GO:0022409	positive regulation of cell-cell adhesion	11/494	134/10468	0.0518573	0.957229	0.957229	SOCS1/PIEZO1/AP3D1/ICAM1/RUNX1/HES1/AGER/HLA-DPB1/MYB/CITED2/EFNB1	11
BP	GO:0045931	positive regulation of mitotic cell cycle	10/494	118/10468	0.0519381	0.957229	0.957229	DTL/CCND2/MEIS2/NUSAP1/CDT1/CDC6/RPTOR/HYAL1/HES1/CCND3	10
BP	GO:0016055	Wnt signaling pathway	23/494	340/10468	0.052196	0.957229	0.957229	AGO1/BAMBI/GRK5/MARK2/GPC6/TYRO3/PKD1/GPRC5B/BRD7/PSMD3/SMURF2/TNRC6C/AP2S1/PSME4/USP34/PSMF1/RUNX1/TNIK/UBE2B/PSMB8/MAPK14/FOXO3/GNAQ	23
BP	GO:0044839	cell cycle G2/M phase transition	17/494	235/10468	0.0527577	0.957229	0.957229	CLSPN/PLK3/ORC1/ENSA/DTL/ATM/AJUBA/YWHAE/ATAD5/PSMD3/CDC6/PSME4/PSMF1/CEP70/PSMB8/PCM1/NBN	17
BP	GO:0034612	response to tumor necrosis factor	14/494	184/10468	0.0529158	0.957229	0.957229	CD58/PSMD3/ICAM1/ZFP36/ZFP36L2/PSME4/PSMF1/SPATA2/HYAL1/LTB/PSMB8/MAPK14/TNFRSF21/FOXO3	14
BP	GO:0198738	cell-cell signaling by wnt	23/494	341/10468	0.0536094	0.957229	0.957229	AGO1/BAMBI/GRK5/MARK2/GPC6/TYRO3/PKD1/GPRC5B/BRD7/PSMD3/SMURF2/TNRC6C/AP2S1/PSME4/USP34/PSMF1/RUNX1/TNIK/UBE2B/PSMB8/MAPK14/FOXO3/GNAQ	23
BP	GO:0008406	gonad development	11/494	135/10468	0.054179	0.957229	0.957229	ARID4B/ATM/ICAM1/CEBPB/TIPARP/VEGFA/FOXO3/CITED2/IMMP2L/GNRH1/ZFPM2	11
BP	GO:0031347	regulation of defense response	29/494	450/10468	0.0542041	0.957229	0.957229	SFPQ/PTGER3/CR1L/ATM/PSPC1/TYRO3/SOCS1/GPRC5B/PSMD3/EPG5/PTPRS/CDC37/PSME4/PSMF1/SPATA2/CEBPB/TBC1D23/PARP14/CLOCK/ELMOD2/AGER/PSMB8/MICB/MAPK14/MAPK13/ULBP2/RNF216/LPL/LRRC14	29
BP	GO:0071453	cellular response to oxygen levels	13/494	168/10468	0.054395	0.957229	0.957229	PLK3/AJUBA/PSMD3/ICAM1/PSME4/PSMF1/CPEB4/PSMB8/VEGFA/FOXO3/CITED2/HIPK2/MYC	13
BP	GO:0031341	regulation of cell killing	5/494	44/10468	0.0549026	0.957229	0.957229	CR1L/ICAM1/AGER/MICB/ULBP2	5
BP	GO:0046637	regulation of alpha-beta T cell differentiation	5/494	44/10468	0.0549026	0.957229	0.957229	ZNF683/SOCS1/AP3D1/RUNX1/MYB	5
BP	GO:0055092	sterol homeostasis	5/494	44/10468	0.0549026	0.957229	0.957229	ACSM3/MTTP/MYLIP/LPL/ABCA2	5
BP	GO:0072009	nephron epithelium development	5/494	44/10468	0.0549026	0.957229	0.957229	ACAT1/PKD1/HES1/VEGFA/MYC	5
BP	GO:0032103	positive regulation of response to external stimulus	12/494	152/10468	0.0556485	0.957229	0.957229	ARTN/PTGER3/GPRC5B/CEBPB/PPM1F/CLOCK/FGF18/AGER/MAPK14/MAPK13/VEGFA/LPL	12
BP	GO:0043200	response to amino acid	7/494	73/10468	0.0559217	0.957229	0.957229	MTHFR/TOMM20/SOCS1/RPTOR/ICAM1/CEBPB/CPEB4	7
BP	GO:0072078	nephron tubule morphogenesis	4/494	31/10468	0.0562841	0.957229	0.957229	PKD1/HES1/VEGFA/MYC	4
BP	GO:0000086	G2/M transition of mitotic cell cycle	16/494	220/10468	0.0567309	0.957229	0.957229	CLSPN/PLK3/ORC1/ENSA/DTL/ATM/AJUBA/YWHAE/PSMD3/CDC6/PSME4/PSMF1/CEP70/PSMB8/PCM1/NBN	16
BP	GO:0090263	positive regulation of canonical Wnt signaling pathway	9/494	104/10468	0.0567347	0.957229	0.957229	BAMBI/GPRC5B/PSMD3/SMURF2/PSME4/USP34/PSMF1/UBE2B/PSMB8	9
BP	GO:0000966	RNA 5'-end processing	3/494	19/10468	0.0576938	0.957229	0.957229	THG1L/RPP21/POP7	3
BP	GO:0009219	pyrimidine deoxyribonucleotide metabolic process	3/494	19/10468	0.0576938	0.957229	0.957229	UNG/NEIL1/DCTPP1	3
BP	GO:0034472	snRNA 3'-end processing	3/494	19/10468	0.0576938	0.957229	0.957229	INTS7/EXOSC6/EXOSC2	3
BP	GO:0046386	deoxyribose phosphate catabolic process	3/494	19/10468	0.0576938	0.957229	0.957229	UNG/NEIL1/DCTPP1	3
BP	GO:0060330	regulation of response to interferon-gamma	3/494	19/10468	0.0576938	0.957229	0.957229	SOCS1/CDC37/PARP14	3
BP	GO:0060334	regulation of interferon-gamma-mediated signaling pathway	3/494	19/10468	0.0576938	0.957229	0.957229	SOCS1/CDC37/PARP14	3
BP	GO:0043009	chordate embryonic development	28/494	435/10468	0.0584807	0.957229	0.957229	MTHFR/HSD17B7/GPR161/CDKN1C/NPAT/ATM/TMED2/TPM1/PKD1/RRN3/TBX6/BPTF/ASF1B/SF3B6/EN1/HS6ST1/ACVR1/DLX1/CEBPB/HYAL1/HES1/SEC24B/UBE2B/TAF8/RPL7L1/VEGFA/NBN/ZFPM2	28
BP	GO:0045766	positive regulation of angiogenesis	8/494	89/10468	0.0585192	0.957229	0.957229	STIM1/PAK4/RHOB/RUNX1/HYAL1/FGF18/VEGFA/HIPK2	8
BP	GO:0046634	regulation of alpha-beta T cell activation	6/494	59/10468	0.058607	0.957229	0.957229	ZNF683/SOCS1/AP3D1/RUNX1/AGER/MYB	6
BP	GO:1902749	regulation of cell cycle G2/M phase transition	14/494	187/10468	0.0590119	0.957229	0.957229	CLSPN/ORC1/DTL/ATM/YWHAE/ATAD5/PSMD3/CDC6/PSME4/PSMF1/CEP70/PSMB8/PCM1/NBN	14
BP	GO:0002562	somatic diversification of immune receptors via germline recombination within a single locus	5/494	45/10468	0.0594797	0.957229	0.957229	ATM/UNG/EXOSC6/ATAD5/NBN	5
BP	GO:0016444	somatic cell DNA recombination	5/494	45/10468	0.0594797	0.957229	0.957229	ATM/UNG/EXOSC6/ATAD5/NBN	5
BP	GO:0072163	mesonephric epithelium development	5/494	45/10468	0.0594797	0.957229	0.957229	GDF11/PKD1/HES1/VEGFA/MYC	5
BP	GO:0072164	mesonephric tubule development	5/494	45/10468	0.0594797	0.957229	0.957229	GDF11/PKD1/HES1/VEGFA/MYC	5
BP	GO:1904035	regulation of epithelial cell apoptotic process	5/494	45/10468	0.0594797	0.957229	0.957229	SORT1/ICAM1/PAK4/ZFP36/FOXO3	5
BP	GO:0019884	antigen processing and presentation of exogenous antigen	11/494	138/10468	0.0615575	0.957229	0.957229	SEC23A/SNAP23/PSMD3/AP3D1/AP2S1/PSME4/PSMF1/SEC13/SEC24B/PSMB8/HLA-DPB1	11
BP	GO:0045137	development of primary sexual characteristics	11/494	138/10468	0.0615575	0.957229	0.957229	ARID4B/ATM/ICAM1/CEBPB/TIPARP/VEGFA/FOXO3/CITED2/IMMP2L/GNRH1/ZFPM2	11
BP	GO:0001701	in utero embryonic development	19/494	275/10468	0.0616563	0.957229	0.957229	CDKN1C/NPAT/TMED2/TPM1/PKD1/RRN3/BPTF/ASF1B/SF3B6/HS6ST1/ACVR1/CEBPB/HES1/UBE2B/TAF8/RPL7L1/VEGFA/NBN/ZFPM2	19
BP	GO:0007389	pattern specification process	17/494	240/10468	0.0618187	0.957229	0.957229	RNF207/NBL1/GPR161/ATM/GDF11/TMED2/RNF111/TBX6/BPTF/DAND5/EN1/ACVR1/DLX1/HES1/CITED2/HIPK2/EFNB1	17
BP	GO:0061333	renal tubule morphogenesis	4/494	32/10468	0.0620276	0.957229	0.957229	PKD1/HES1/VEGFA/MYC	4
BP	GO:0010212	response to ionizing radiation	10/494	122/10468	0.0623856	0.957229	0.957229	INTS7/CYP2R1/ATM/RAD51/TLK2/ICAM1/RHOB/CLOCK/MAPK14/MYC	10
BP	GO:0045637	regulation of myeloid cell differentiation	12/494	155/10468	0.0626899	0.957229	0.957229	AGO1/MEIS2/SETD1A/TNRC6C/ZFP36/CEBPB/RUNX1/HSPA9/MAPK14/FOXO3/TRIB1/MYC	12
BP	GO:0003231	cardiac ventricle development	7/494	75/10468	0.0629653	0.957229	0.957229	TPM1/DAND5/LTBP1/ACVR1/HES1/CITED2/ZFPM2	7
BP	GO:0030856	regulation of epithelial cell differentiation	7/494	75/10468	0.0629653	0.957229	0.957229	CDKN1C/ZFP36/CEBPB/RUNX1/HES1/CLOCK/VEGFA	7
BP	GO:1902806	regulation of cell cycle G1/S phase transition	11/494	139/10468	0.0641565	0.957229	0.957229	PLK3/ECD/ATM/CCND2/PKD1/BRD7/CDC6/RPTOR/ARID3A/HYAL1/CCND3	11
BP	GO:0001823	mesonephros development	5/494	46/10468	0.0642677	0.957229	0.957229	GDF11/PKD1/HES1/VEGFA/MYC	5
BP	GO:1901988	negative regulation of cell cycle phase transition	15/494	207/10468	0.0652066	0.957229	0.957229	CLSPN/PLK3/ORC1/DTL/ATM/BRD7/CDT1/PSMD3/CDC6/ARID3A/ZFP36L2/PSME4/PSMF1/PSMB8/NBN	15
BP	GO:1903311	regulation of mRNA metabolic process	19/494	277/10468	0.0652814	0.957229	0.957229	CDK11A/CDK11B/AHCYL1/RBM4B/ZC3H10/SART3/ZC3H14/EXOSC6/NSRP1/PSMD3/TNRC6C/ZFP36/SUPT5H/ZFP36L2/PSME4/PSMF1/PSMB8/MAPK14/EXOSC2	19
BP	GO:0009799	specification of symmetry	7/494	76/10468	0.0666806	0.957229	0.957229	RNF207/NBL1/TMED2/TBX6/DAND5/ACVR1/CITED2	7
BP	GO:0009855	determination of bilateral symmetry	7/494	76/10468	0.0666806	0.957229	0.957229	RNF207/NBL1/TMED2/TBX6/DAND5/ACVR1/CITED2	7
BP	GO:0045446	endothelial cell differentiation	6/494	61/10468	0.066858	0.957229	0.957229	GSTM3/PTPRS/ICAM1/ACVR1/VEGFA/RAP2C	6
BP	GO:0072073	kidney epithelium development	6/494	61/10468	0.066858	0.957229	0.957229	ACAT1/GDF11/PKD1/HES1/VEGFA/MYC	6
BP	GO:0010389	regulation of G2/M transition of mitotic cell cycle	13/494	174/10468	0.0679956	0.957229	0.957229	CLSPN/ORC1/DTL/ATM/YWHAE/PSMD3/CDC6/PSME4/PSMF1/CEP70/PSMB8/PCM1/NBN	13
BP	GO:0001910	regulation of leukocyte mediated cytotoxicity	4/494	33/10468	0.0680677	0.957229	0.957229	ICAM1/AGER/MICB/ULBP2	4
BP	GO:0002204	somatic recombination of immunoglobulin genes involved in immune response	4/494	33/10468	0.0680677	0.957229	0.957229	UNG/EXOSC6/ATAD5/NBN	4
BP	GO:0002208	somatic diversification of immunoglobulins involved in immune response	4/494	33/10468	0.0680677	0.957229	0.957229	UNG/EXOSC6/ATAD5/NBN	4
BP	GO:0038066	p38MAPK cascade	4/494	33/10468	0.0680677	0.957229	0.957229	ZFP36/AGER/MAPK14/VEGFA	4
BP	GO:0045190	isotype switching	4/494	33/10468	0.0680677	0.957229	0.957229	UNG/EXOSC6/ATAD5/NBN	4
BP	GO:0072088	nephron epithelium morphogenesis	4/494	33/10468	0.0680677	0.957229	0.957229	PKD1/HES1/VEGFA/MYC	4
BP	GO:0072523	purine-containing compound catabolic process	4/494	33/10468	0.0680677	0.957229	0.957229	ACOT7/ACAT1/HDDC3/HINT1	4
BP	GO:0008333	endosome to lysosome transport	5/494	47/10468	0.0692656	0.957229	0.957229	SORT1/VPS18/EPG5/AP3D1/RHOB	5
BP	GO:0060333	interferon-gamma-mediated signaling pathway	5/494	47/10468	0.0692656	0.957229	0.957229	SOCS1/ICAM1/CDC37/PARP14/HLA-DPB1	5
BP	GO:0002377	immunoglobulin production	7/494	77/10468	0.0705254	0.957229	0.957229	ATM/UNG/EXOSC6/ATAD5/PMS2/PMS2P1/NBN	7
BP	GO:0009792	embryo development ending in birth or egg hatching	28/494	444/10468	0.0715172	0.957229	0.957229	MTHFR/HSD17B7/GPR161/CDKN1C/NPAT/ATM/TMED2/TPM1/PKD1/RRN3/TBX6/BPTF/ASF1B/SF3B6/EN1/HS6ST1/ACVR1/DLX1/CEBPB/HYAL1/HES1/SEC24B/UBE2B/TAF8/RPL7L1/VEGFA/NBN/ZFPM2	28
BP	GO:0003007	heart morphogenesis	11/494	142/10468	0.0723781	0.957229	0.957229	RNF207/DHRS3/TMED2/TPM1/TBX6/ACVR1/HES1/SEC24B/VEGFA/CITED2/ZFPM2	11
BP	GO:0015012	heparan sulfate proteoglycan biosynthetic process	3/494	21/10468	0.0739357	0.957229	0.957229	EXT2/HS6ST1/PXYLP1	3
BP	GO:0032735	positive regulation of interleukin-12 production	3/494	21/10468	0.0739357	0.957229	0.957229	LTB/AGER/MAPK14	3
BP	GO:0032924	activin receptor signaling pathway	3/494	21/10468	0.0739357	0.957229	0.957229	DAND5/ACVR1/CITED2	3
BP	GO:0050873	brown fat cell differentiation	3/494	21/10468	0.0739357	0.957229	0.957229	CEBPB/MAPK14/ARL4A	3
BP	GO:0071675	regulation of mononuclear cell migration	3/494	21/10468	0.0739357	0.957229	0.957229	NBL1/AGER/MAPK14	3
BP	GO:0086009	membrane repolarization	3/494	21/10468	0.0739357	0.957229	0.957229	RNF207/NOS1AP/YWHAE	3
BP	GO:2000826	regulation of heart morphogenesis	3/494	21/10468	0.0739357	0.957229	0.957229	RNF207/ACVR1/HES1	3
BP	GO:0046638	positive regulation of alpha-beta T cell differentiation	4/494	34/10468	0.0743999	0.957229	0.957229	SOCS1/AP3D1/RUNX1/MYB	4
BP	GO:0071385	cellular response to glucocorticoid stimulus	4/494	34/10468	0.0743999	0.957229	0.957229	ICAM1/ZFP36/ZFP36L2/FOXO3	4
BP	GO:0072028	nephron morphogenesis	4/494	34/10468	0.0743999	0.957229	0.957229	PKD1/HES1/VEGFA/MYC	4
BP	GO:0030509	BMP signaling pathway	7/494	78/10468	0.0744997	0.957229	0.957229	NBL1/SMURF2/DAND5/ACVR1/DLX1/HES1/HIPK2	7
BP	GO:0007059	chromosome segregation	18/494	264/10468	0.0746313	0.957229	0.957229	SFPQ/MSTO1/PMF1/MKI67/FEN1/ATM/OIP5/NUSAP1/CDT1/CDC6/TLK2/TOP3B/STAG1/PDS5A/UBE2B/BOD1/STAG3L2/NTMT1	18
BP	GO:0007178	transmembrane receptor protein serine/threonine kinase signaling pathway	14/494	194/10468	0.0750403	0.957229	0.957229	NBL1/BAMBI/CDKN1C/GDF11/RNF111/SMURF2/DAND5/LTBP1/ACVR1/DLX1/HES1/MAPK14/CITED2/HIPK2	14
BP	GO:0035567	non-canonical Wnt signaling pathway	9/494	110/10468	0.0752731	0.957229	0.957229	AGO1/GPC6/PSMD3/SMURF2/TNRC6C/AP2S1/PSME4/PSMF1/PSMB8	9
BP	GO:0034404	nucleobase-containing small molecule biosynthetic process	13/494	177/10468	0.0755676	0.957229	0.957229	ACOT7/HKDC1/ECD/ACAT1/UNG/NEIL1/HDDC3/DCTPP1/APRT/ALDOC/NUP85/SEC13/HINT1	13
BP	GO:0002693	positive regulation of cellular extravasation	2/494	10/10468	0.0778137	0.957229	0.957229	ICAM1/AGER	2
BP	GO:0006285	base-excision repair, AP site formation	2/494	10/10468	0.0778137	0.957229	0.957229	UNG/NEIL1	2
BP	GO:0007263	nitric oxide mediated signal transduction	2/494	10/10468	0.0778137	0.957229	0.957229	NOS1AP/VEGFA	2
BP	GO:0010842	retina layer formation	2/494	10/10468	0.0778137	0.957229	0.957229	FJX1/HIPK2	2
BP	GO:0015937	coenzyme A biosynthetic process	2/494	10/10468	0.0778137	0.957229	0.957229	ACOT7/ACAT1	2
BP	GO:0030852	regulation of granulocyte differentiation	2/494	10/10468	0.0778137	0.957229	0.957229	RUNX1/TRIB1	2
BP	GO:0031126	snoRNA 3'-end processing	2/494	10/10468	0.0778137	0.957229	0.957229	EXOSC6/EXOSC2	2
BP	GO:0034427	nuclear-transcribed mRNA catabolic process, exonucleolytic, 3'-5'	2/494	10/10468	0.0778137	0.957229	0.957229	EXOSC6/EXOSC2	2
BP	GO:0035246	peptidyl-arginine N-methylation	2/494	10/10468	0.0778137	0.957229	0.957229	NDUFAF7/FBXO11	2
BP	GO:0046033	AMP metabolic process	2/494	10/10468	0.0778137	0.957229	0.957229	APRT/ADSL	2
BP	GO:0046498	S-adenosylhomocysteine metabolic process	2/494	10/10468	0.0778137	0.957229	0.957229	AHCYL1/AHCYL2	2
BP	GO:0048715	negative regulation of oligodendrocyte differentiation	2/494	10/10468	0.0778137	0.957229	0.957229	DLX1/HES1	2
BP	GO:0072574	hepatocyte proliferation	2/494	10/10468	0.0778137	0.957229	0.957229	RPS6KA1/CEBPB	2
BP	GO:0072575	epithelial cell proliferation involved in liver morphogenesis	2/494	10/10468	0.0778137	0.957229	0.957229	RPS6KA1/CEBPB	2
BP	GO:0098911	regulation of ventricular cardiac muscle cell action potential	2/494	10/10468	0.0778137	0.957229	0.957229	RNF207/NOS1AP	2
BP	GO:0099188	postsynaptic cytoskeleton organization	2/494	10/10468	0.0778137	0.957229	0.957229	NOS1AP/POTEKP	2
BP	GO:1900120	regulation of receptor binding	2/494	10/10468	0.0778137	0.957229	0.957229	PTPRF/PLCL1	2
BP	GO:1900221	regulation of amyloid-beta clearance	2/494	10/10468	0.0778137	0.957229	0.957229	LRPAP1/CYP51A1	2
BP	GO:2000194	regulation of female gonad development	2/494	10/10468	0.0778137	0.957229	0.957229	GNRH1/ZFPM2	2
BP	GO:2001026	regulation of endothelial cell chemotaxis	2/494	10/10468	0.0778137	0.957229	0.957229	FGF18/VEGFA	2
BP	GO:2001185	regulation of CD8-positive, alpha-beta T cell activation	2/494	10/10468	0.0778137	0.957229	0.957229	SOCS1/RUNX1	2
BP	GO:0043523	regulation of neuron apoptotic process	11/494	144/10468	0.0782162	0.957229	0.957229	MCL1/UNC5B/ATM/TYRO3/EN1/DLX1/CEBPB/CPEB4/FOXO3/MYB/HIPK2	11
BP	GO:0046651	lymphocyte proliferation	11/494	144/10468	0.0782162	0.957229	0.957229	ATM/ATAD5/CEBPB/HES1/LST1/AGER/HLA-DPB1/CCND3/TNFRSF21/GNRH1/EFNB1	11
BP	GO:0071478	cellular response to radiation	11/494	144/10468	0.0782162	0.957229	0.957229	INTS7/ATM/RAD51/TLK2/RHOB/HYAL1/CLOCK/RRH/MAPK14/MAPK13/MYC	11
BP	GO:0042770	signal transduction in response to DNA damage	9/494	111/10468	0.0786859	0.957229	0.957229	PLK3/DTL/ATM/ATAD5/ARID3A/MAPK14/FOXO3/HIPK2/NBN	9
BP	GO:0001736	establishment of planar polarity	8/494	95/10468	0.0793055	0.957229	0.957229	GPC6/PSMD3/SMURF2/AP2S1/PSME4/PSMF1/SEC24B/PSMB8	8
BP	GO:0007164	establishment of tissue polarity	8/494	95/10468	0.0793055	0.957229	0.957229	GPC6/PSMD3/SMURF2/AP2S1/PSME4/PSMF1/SEC24B/PSMB8	8
BP	GO:0045638	negative regulation of myeloid cell differentiation	5/494	49/10468	0.0798853	0.957229	0.957229	MEIS2/ZFP36/HSPA9/TRIB1/MYC	5
BP	GO:0042273	ribosomal large subunit biogenesis	6/494	64/10468	0.0804379	0.957229	0.957229	MRTO4/RPL11/NVL/AAMP/SDAD1/RPL7L1	6
BP	GO:0046632	alpha-beta T cell differentiation	6/494	64/10468	0.0804379	0.957229	0.957229	RPL22/ZNF683/SOCS1/AP3D1/RUNX1/MYB	6
BP	GO:0031016	pancreas development	4/494	35/10468	0.0810186	0.957229	0.957229	GDF11/MEIS2/HES1/CLOCK	4
BP	GO:0051145	smooth muscle cell differentiation	4/494	35/10468	0.0810186	0.957229	0.957229	OLFM2/ACVR1/HES1/VEGFA	4
BP	GO:1903037	regulation of leukocyte cell-cell adhesion	12/494	162/10468	0.0813341	0.957229	0.957229	SOCS1/AP3D1/ICAM1/CEBPB/RUNX1/HES1/AGER/HLA-DPB1/TNFRSF21/MYB/GNRH1/EFNB1	12
BP	GO:1901991	negative regulation of mitotic cell cycle phase transition	14/494	197/10468	0.0827025	0.957229	0.957229	CLSPN/PLK3/ORC1/ATM/BRD7/CDT1/PSMD3/CDC6/ARID3A/ZFP36L2/PSME4/PSMF1/PSMB8/NBN	14
BP	GO:0006730	one-carbon metabolic process	3/494	22/10468	0.0827343	0.957229	0.957229	MTHFR/AHCYL1/AHCYL2	3
BP	GO:0016578	histone deubiquitination	3/494	22/10468	0.0827343	0.957229	0.957229	SART3/ATXN7L3/ATXN7	3
BP	GO:1902253	regulation of intrinsic apoptotic signaling pathway by p53 class mediator	3/494	22/10468	0.0827343	0.957229	0.957229	RPL11/RRN3/ATAD5	3
BP	GO:0007601	visual perception	7/494	80/10468	0.0828361	0.957229	0.957229	DHRS3/BBS10/REEP6/OLFM2/ATXN7/CRYGS/RRH	7
BP	GO:0002695	negative regulation of leukocyte activation	8/494	96/10468	0.083148	0.957229	0.957229	ATM/TYRO3/SOCS1/CEBPB/RUNX1/LST1/TNFRSF21/GNRH1	8
BP	GO:0030324	lung development	8/494	96/10468	0.083148	0.957229	0.957229	PKD1/HS6ST1/HES1/SEC24B/FGF18/VEGFA/AIMP2/ZFPM2	8
BP	GO:0032943	mononuclear cell proliferation	11/494	146/10468	0.0843422	0.957229	0.957229	ATM/ATAD5/CEBPB/HES1/LST1/AGER/HLA-DPB1/CCND3/TNFRSF21/GNRH1/EFNB1	11
BP	GO:0003206	cardiac chamber morphogenesis	6/494	65/10468	0.0852832	0.957229	0.957229	DHRS3/TPM1/ACVR1/HES1/CITED2/ZFPM2	6
BP	GO:0006024	glycosaminoglycan biosynthetic process	6/494	65/10468	0.0852832	0.957229	0.957229	EXT2/GPC6/HS6ST1/GALNT5/HYAL1/PXYLP1	6
BP	GO:0006029	proteoglycan metabolic process	5/494	50/10468	0.0855031	0.957229	0.957229	EXT2/HS6ST1/HYAL1/PXYLP1/EGFLAM	5
BP	GO:0042129	regulation of T cell proliferation	7/494	81/10468	0.0871976	0.957229	0.957229	CEBPB/HES1/AGER/HLA-DPB1/TNFRSF21/GNRH1/EFNB1	7
BP	GO:0050953	sensory perception of light stimulus	7/494	81/10468	0.0871976	0.957229	0.957229	DHRS3/BBS10/REEP6/OLFM2/ATXN7/CRYGS/RRH	7
BP	GO:0060071	Wnt signaling pathway, planar cell polarity pathway	7/494	81/10468	0.0871976	0.957229	0.957229	GPC6/PSMD3/SMURF2/AP2S1/PSME4/PSMF1/PSMB8	7
BP	GO:0002027	regulation of heart rate	4/494	36/10468	0.0879179	0.957229	0.957229	NOS1AP/TPM1/YWHAE/SPTBN4	4
BP	GO:0045600	positive regulation of fat cell differentiation	4/494	36/10468	0.0879179	0.957229	0.957229	ZFP36/CEBPB/MAPK14/LPL	4
BP	GO:0071384	cellular response to corticosteroid stimulus	4/494	36/10468	0.0879179	0.957229	0.957229	ICAM1/ZFP36/ZFP36L2/FOXO3	4
BP	GO:0001101	response to acid chemical	14/494	199/10468	0.0880792	0.957229	0.957229	MTHFR/TOMM20/ATM/SOCS1/RPTOR/EEF2/ICAM1/CEBPB/CPEB4/MICB/VEGFA/MYB/LPL/GNRH1	14
BP	GO:0048199	vesicle targeting, to, from or within Golgi	6/494	66/10468	0.0902859	0.957229	0.957229	TMED2/SEC23A/GOSR1/WIPI1/SEC13/SEC24B	6
BP	GO:0050921	positive regulation of chemotaxis	6/494	66/10468	0.0902859	0.957229	0.957229	ARTN/PPM1F/FGF18/AGER/MAPK14/VEGFA	6
BP	GO:0009581	detection of external stimulus	5/494	51/10468	0.0913228	0.957229	0.957229	PKD1/PIEZO1/REEP6/RRH/GNAQ	5
BP	GO:0046173	polyol biosynthetic process	5/494	51/10468	0.0913228	0.957229	0.957229	ASAH2B/CYP2R1/SPR/PLCL1/PCBD2	5
BP	GO:0030201	heparan sulfate proteoglycan metabolic process	3/494	23/10468	0.0919579	0.957229	0.957229	EXT2/HS6ST1/PXYLP1	3
BP	GO:0034122	negative regulation of toll-like receptor signaling pathway	3/494	23/10468	0.0919579	0.957229	0.957229	TYRO3/PTPRS/LRRC14	3
BP	GO:0001682	tRNA 5'-leader removal	2/494	11/10468	0.092222	0.957229	0.957229	RPP21/POP7	2
BP	GO:0007157	heterophilic cell-cell adhesion via plasma membrane cell adhesion molecules	2/494	11/10468	0.092222	0.957229	0.957229	ICAM1/CD164	2
BP	GO:0009109	coenzyme catabolic process	2/494	11/10468	0.092222	0.957229	0.957229	ACOT7/ACAT1	2
BP	GO:0009650	UV protection	2/494	11/10468	0.092222	0.957229	0.957229	FEN1/ERCC5	2
BP	GO:0023019	signal transduction involved in regulation of gene expression	2/494	11/10468	0.092222	0.957229	0.957229	TBX6/DAND5	2
BP	GO:0031281	positive regulation of cyclase activity	2/494	11/10468	0.092222	0.957229	0.957229	STIM1/MAPK14	2
BP	GO:0033127	regulation of histone phosphorylation	2/494	11/10468	0.092222	0.957229	0.957229	ATM/UBE2B	2
BP	GO:0036037	CD8-positive, alpha-beta T cell activation	2/494	11/10468	0.092222	0.957229	0.957229	SOCS1/RUNX1	2
BP	GO:0036303	lymph vessel morphogenesis	2/494	11/10468	0.092222	0.957229	0.957229	PKD1/VEGFA	2
BP	GO:0042532	negative regulation of tyrosine phosphorylation of STAT protein	2/494	11/10468	0.092222	0.957229	0.957229	SOCS1/PARP14	2
BP	GO:0043144	snoRNA processing	2/494	11/10468	0.092222	0.957229	0.957229	EXOSC6/EXOSC2	2
BP	GO:0048240	sperm capacitation	2/494	11/10468	0.092222	0.957229	0.957229	CATSPER2/PCSK4	2
BP	GO:0051004	regulation of lipoprotein lipase activity	2/494	11/10468	0.092222	0.957229	0.957229	SORT1/LPL	2
BP	GO:0051349	positive regulation of lyase activity	2/494	11/10468	0.092222	0.957229	0.957229	STIM1/ISCU	2
BP	GO:0060307	regulation of ventricular cardiac muscle cell membrane repolarization	2/494	11/10468	0.092222	0.957229	0.957229	RNF207/NOS1AP	2
BP	GO:0060977	coronary vasculature morphogenesis	2/494	11/10468	0.092222	0.957229	0.957229	SEC24B/VEGFA	2
BP	GO:0071712	ER-associated misfolded protein catabolic process	2/494	11/10468	0.092222	0.957229	0.957229	UGGT1/SDF2L1	2
BP	GO:0072273	metanephric nephron morphogenesis	2/494	11/10468	0.092222	0.957229	0.957229	PKD1/HES1	2
BP	GO:0072425	signal transduction involved in G2 DNA damage checkpoint	2/494	11/10468	0.092222	0.957229	0.957229	DTL/ATM	2
BP	GO:0072576	liver morphogenesis	2/494	11/10468	0.092222	0.957229	0.957229	RPS6KA1/CEBPB	2
BP	GO:2000047	regulation of cell-cell adhesion mediated by cadherin	2/494	11/10468	0.092222	0.957229	0.957229	PPM1F/VEGFA	2
BP	GO:0035735	intraciliary transport involved in cilium assembly	4/494	37/10468	0.0950908	0.957229	0.957229	IFT46/DYNLRB1/TTC26/PCM1	4
BP	GO:0030323	respiratory tube development	8/494	99/10468	0.0953225	0.957229	0.957229	PKD1/HS6ST1/HES1/SEC24B/FGF18/VEGFA/AIMP2/ZFPM2	8
BP	GO:0050729	positive regulation of inflammatory response	6/494	67/10468	0.0954448	0.957229	0.957229	PTGER3/GPRC5B/CEBPB/CLOCK/MAPK13/LPL	6
BP	GO:0000079	regulation of cyclin-dependent protein serine/threonine kinase activity	7/494	83/10468	0.0963039	0.957229	0.957229	CDKN1C/CCND2/PKD1/CDC6/CDC37/SPDYA/CCND3	7
BP	GO:0071772	response to BMP	7/494	83/10468	0.0963039	0.957229	0.957229	NBL1/SMURF2/DAND5/ACVR1/DLX1/HES1/HIPK2	7
BP	GO:0071773	cellular response to BMP stimulus	7/494	83/10468	0.0963039	0.957229	0.957229	NBL1/SMURF2/DAND5/ACVR1/DLX1/HES1/HIPK2	7
BP	GO:0019882	antigen processing and presentation	12/494	167/10468	0.0965875	0.957229	0.957229	SEC23A/SNAP23/PSMD3/AP3D1/ICAM1/AP2S1/PSME4/PSMF1/SEC13/SEC24B/PSMB8/HLA-DPB1	12
BP	GO:0051402	neuron apoptotic process	12/494	167/10468	0.0965875	0.957229	0.957229	MCL1/UNC5B/ATM/TYRO3/EN1/DLX1/CEBPB/CPEB4/TNFRSF21/FOXO3/MYB/HIPK2	12
BP	GO:0006521	regulation of cellular amino acid metabolic process	5/494	52/10468	0.0973413	0.957229	0.957229	PSMD3/ODC1/PSME4/PSMF1/PSMB8	5
BP	GO:0006023	aminoglycan biosynthetic process	6/494	68/10468	0.100758	0.957229	0.957229	EXT2/GPC6/HS6ST1/GALNT5/HYAL1/PXYLP1	6
BP	GO:0032092	positive regulation of protein binding	6/494	68/10468	0.100758	0.957229	0.957229	RPL11/NVL/BAMBI/PKD1/PLCL1/HIPK2	6
BP	GO:0010634	positive regulation of epithelial cell migration	7/494	84/10468	0.101047	0.957229	0.957229	RHOB/AAMP/PPM1F/CAPN7/HYAL1/FGF18/VEGFA	7
BP	GO:0046631	alpha-beta T cell activation	7/494	84/10468	0.101047	0.957229	0.957229	RPL22/ZNF683/SOCS1/AP3D1/RUNX1/AGER/MYB	7
BP	GO:0048729	tissue morphogenesis	24/494	386/10468	0.10133	0.957229	0.957229	RNF207/MTHFR/ARTN/EXT2/TMED2/GPC6/AJUBA/TPM1/PKD1/TBX6/PSMD3/SMURF2/AP2S1/RHOB/PSME4/ACVR1/PSMF1/CRYGS/HES1/SEC24B/PSMB8/VEGFA/ZFPM2/MYC	24
BP	GO:0016180	snRNA processing	3/494	24/10468	0.101585	0.957229	0.957229	INTS7/EXOSC6/EXOSC2	3
BP	GO:0030851	granulocyte differentiation	3/494	24/10468	0.101585	0.957229	0.957229	LBR/RUNX1/TRIB1	3
BP	GO:0048713	regulation of oligodendrocyte differentiation	3/494	24/10468	0.101585	0.957229	0.957229	DLX1/HES1/TNFRSF21	3
BP	GO:0050654	chondroitin sulfate proteoglycan metabolic process	3/494	24/10468	0.101585	0.957229	0.957229	HYAL1/PXYLP1/EGFLAM	3
BP	GO:0002381	immunoglobulin production involved in immunoglobulin mediated immune response	4/494	38/10468	0.10253	0.957229	0.957229	UNG/EXOSC6/ATAD5/NBN	4
BP	GO:0016447	somatic recombination of immunoglobulin gene segments	4/494	38/10468	0.10253	0.957229	0.957229	UNG/EXOSC6/ATAD5/NBN	4
BP	GO:0045646	regulation of erythrocyte differentiation	4/494	38/10468	0.10253	0.957229	0.957229	ZFP36/HSPA9/MAPK14/FOXO3	4
BP	GO:0061371	determination of heart left/right asymmetry	4/494	38/10468	0.10253	0.957229	0.957229	RNF207/TMED2/TBX6/DAND5	4
BP	GO:1990089	response to nerve growth factor	4/494	38/10468	0.10253	0.957229	0.957229	SORT1/ARPC3/EEF2/FOXO3	4
BP	GO:1990090	cellular response to nerve growth factor stimulus	4/494	38/10468	0.10253	0.957229	0.957229	SORT1/ARPC3/EEF2/FOXO3	4
BP	GO:2000243	positive regulation of reproductive process	4/494	38/10468	0.10253	0.957229	0.957229	SMURF2/UBE2B/CITED2/ZFPM2	4
BP	GO:0009582	detection of abiotic stimulus	5/494	53/10468	0.103555	0.957229	0.957229	PKD1/PIEZO1/REEP6/RRH/GNAQ	5
BP	GO:0097006	regulation of plasma lipoprotein particle levels	5/494	53/10468	0.103555	0.957229	0.957229	AP2S1/LRPAP1/MTTP/MYLIP/LPL	5
BP	GO:1904018	positive regulation of vasculature development	8/494	101/10468	0.103974	0.957229	0.957229	STIM1/PAK4/RHOB/RUNX1/HYAL1/FGF18/VEGFA/HIPK2	8
BP	GO:0050684	regulation of mRNA processing	9/494	118/10468	0.10517	0.957229	0.957229	CDK11A/CDK11B/AHCYL1/RBM4B/ZC3H10/SART3/ZC3H14/NSRP1/SUPT5H	9
BP	GO:0044106	cellular amine metabolic process	7/494	85/10468	0.105916	0.957229	0.957229	SRM/PSMD3/GDPD1/ODC1/PSME4/PSMF1/PSMB8	7
BP	GO:0090288	negative regulation of cellular response to growth factor stimulus	7/494	85/10468	0.105916	0.957229	0.957229	NBL1/BAMBI/SMURF2/DAND5/LTBP1/DLX1/HIPK2	7
BP	GO:0016579	protein deubiquitination	15/494	223/10468	0.105929	0.957229	0.957229	CLSPN/TOMM20/DESI2/SART3/PSMD3/ATXN7L3/SMURF2/PSME4/USP34/USP39/PSMF1/SPATA2/ATXN7/PSMB8/MYC	15
BP	GO:0006596	polyamine biosynthetic process	2/494	12/10468	0.107325	0.957229	0.957229	SRM/ODC1	2
BP	GO:0008209	androgen metabolic process	2/494	12/10468	0.107325	0.957229	0.957229	CYP17A1/TIPARP	2
BP	GO:0008298	intracellular mRNA localization	2/494	12/10468	0.107325	0.957229	0.957229	ZFP36/EXOSC2	2
BP	GO:0009954	proximal/distal pattern formation	2/494	12/10468	0.107325	0.957229	0.957229	EN1/DLX1	2
BP	GO:0014850	response to muscle activity	2/494	12/10468	0.107325	0.957229	0.957229	TOMM20/ADSL	2
BP	GO:0014912	negative regulation of smooth muscle cell migration	2/494	12/10468	0.107325	0.957229	0.957229	TPM1/TRIB1	2
BP	GO:0018216	peptidyl-arginine methylation	2/494	12/10468	0.107325	0.957229	0.957229	NDUFAF7/FBXO11	2
BP	GO:0030728	ovulation	2/494	12/10468	0.107325	0.957229	0.957229	FOXO3/IMMP2L	2
BP	GO:0032802	low-density lipoprotein particle receptor catabolic process	2/494	12/10468	0.107325	0.957229	0.957229	AP2S1/MYLIP	2
BP	GO:0035883	enteroendocrine cell differentiation	2/494	12/10468	0.107325	0.957229	0.957229	HES1/CLOCK	2
BP	GO:0043649	dicarboxylic acid catabolic process	2/494	12/10468	0.107325	0.957229	0.957229	GLUL/GAD1	2
BP	GO:0045408	regulation of interleukin-6 biosynthetic process	2/494	12/10468	0.107325	0.957229	0.957229	CEBPB/AGER	2
BP	GO:0045954	positive regulation of natural killer cell mediated cytotoxicity	2/494	12/10468	0.107325	0.957229	0.957229	MICB/ULBP2	2
BP	GO:0060009	Sertoli cell development	2/494	12/10468	0.107325	0.957229	0.957229	ARID4B/ICAM1	2
BP	GO:0060211	regulation of nuclear-transcribed mRNA poly(A) tail shortening	2/494	12/10468	0.107325	0.957229	0.957229	TNRC6C/ZFP36	2
BP	GO:0060213	positive regulation of nuclear-transcribed mRNA poly(A) tail shortening	2/494	12/10468	0.107325	0.957229	0.957229	TNRC6C/ZFP36	2
BP	GO:0099623	regulation of cardiac muscle cell membrane repolarization	2/494	12/10468	0.107325	0.957229	0.957229	RNF207/NOS1AP	2
BP	GO:0099625	ventricular cardiac muscle cell membrane repolarization	2/494	12/10468	0.107325	0.957229	0.957229	RNF207/NOS1AP	2
BP	GO:1901018	positive regulation of potassium ion transmembrane transporter activity	2/494	12/10468	0.107325	0.957229	0.957229	RNF207/NOS1AP	2
BP	GO:0050727	regulation of inflammatory response	13/494	188/10468	0.107848	0.957229	0.957229	PTGER3/CR1L/ATM/TYRO3/GPRC5B/SPATA2/CEBPB/TBC1D23/CLOCK/AGER/MAPK14/MAPK13/LPL	13
BP	GO:0002478	antigen processing and presentation of exogenous peptide antigen	10/494	136/10468	0.109068	0.957229	0.957229	SEC23A/SNAP23/PSMD3/AP2S1/PSME4/PSMF1/SEC13/SEC24B/PSMB8/HLA-DPB1	10
BP	GO:1903039	positive regulation of leukocyte cell-cell adhesion	9/494	119/10468	0.109321	0.957229	0.957229	SOCS1/AP3D1/ICAM1/RUNX1/HES1/AGER/HLA-DPB1/MYB/EFNB1	9
BP	GO:0006695	cholesterol biosynthetic process	5/494	54/10468	0.109961	0.957229	0.957229	HSD17B7/LBR/GGPS1/SCAP/CYP51A1	5
BP	GO:0006721	terpenoid metabolic process	5/494	54/10468	0.109961	0.957229	0.957229	DHRS3/GGPS1/GPC6/CYP2S1/LPL	5
BP	GO:0033260	nuclear DNA replication	5/494	54/10468	0.109961	0.957229	0.957229	FEN1/RAD51/CDT1/ATAD5/PRIM2	5
BP	GO:1902653	secondary alcohol biosynthetic process	5/494	54/10468	0.109961	0.957229	0.957229	HSD17B7/LBR/GGPS1/SCAP/CYP51A1	5
BP	GO:0007131	reciprocal meiotic recombination	4/494	39/10468	0.110227	0.957229	0.957229	ATM/RAD51/MND1/UBE2B	4
BP	GO:0030101	natural killer cell activation	4/494	39/10468	0.110227	0.957229	0.957229	ZNF683/TYRO3/MICB/ULBP2	4
BP	GO:2000514	regulation of CD4-positive, alpha-beta T cell activation	4/494	39/10468	0.110227	0.957229	0.957229	SOCS1/RUNX1/AGER/MYB	4
BP	GO:1904029	regulation of cyclin-dependent protein kinase activity	7/494	86/10468	0.110908	0.957229	0.957229	CDKN1C/CCND2/PKD1/CDC6/CDC37/SPDYA/CCND3	7
BP	GO:0000956	nuclear-transcribed mRNA catabolic process	13/494	189/10468	0.111136	0.957229	0.957229	RPL22/MRTO4/RPL11/AGO1/RPS27/ATM/RPL41/SMG1/EXOSC6/TNRC6C/ZFP36/ZFP36L2/EXOSC2	13
BP	GO:0032653	regulation of interleukin-10 production	3/494	25/10468	0.111594	0.957229	0.957229	TRIB2/AGER/TNFRSF21	3
BP	GO:2001239	regulation of extrinsic apoptotic signaling pathway in absence of ligand	3/494	25/10468	0.111594	0.957229	0.957229	IFI6/MCL1/UNC5B	3
BP	GO:0070661	leukocyte proliferation	11/494	154/10468	0.111731	0.957229	0.957229	ATM/ATAD5/CEBPB/HES1/LST1/AGER/HLA-DPB1/CCND3/TNFRSF21/GNRH1/EFNB1	11
BP	GO:0071560	cellular response to transforming growth factor beta stimulus	11/494	154/10468	0.111731	0.957229	0.957229	BAMBI/CDKN1C/RNF111/SMURF2/DAND5/LTBP1/ZFP36L2/ACVR1/DLX1/CITED2/HIPK2	11
BP	GO:0006720	isoprenoid metabolic process	6/494	70/10468	0.111841	0.957229	0.957229	DHRS3/GGPS1/GPC6/CYP2S1/COQ2/LPL	6
BP	GO:0007368	determination of left/right symmetry	6/494	70/10468	0.111841	0.957229	0.957229	RNF207/TMED2/TBX6/DAND5/ACVR1/CITED2	6
BP	GO:0061418	regulation of transcription from RNA polymerase II promoter in response to hypoxia	6/494	70/10468	0.111841	0.957229	0.957229	PSMD3/PSME4/PSMF1/PSMB8/VEGFA/CITED2	6
BP	GO:0006261	DNA-dependent DNA replication	10/494	137/10468	0.113008	0.957229	0.957229	ORC1/FEN1/CDK2AP1/RAD51/CDT1/ATAD5/CDC6/PRIM2/NBN/RECQL4	10
BP	GO:0008360	regulation of cell shape	8/494	103/10468	0.113047	0.957229	0.957229	BAMBI/MARK2/TPM1/ICAM1/RHOB/PLXNB1/LST1/VEGFA	8
BP	GO:0051236	establishment of RNA localization	12/494	172/10468	0.113463	0.957229	0.957229	SRRM1/SFPQ/TOMM20/ATM/NPIPA1/SMG1/NUP85/ZFP36/POLDIP3/SEC13/SDAD1/XPO7	12
BP	GO:0003002	regionalization	13/494	190/10468	0.114483	0.957229	0.957229	NBL1/GPR161/ATM/GDF11/TMED2/TBX6/BPTF/EN1/ACVR1/DLX1/HES1/CITED2/HIPK2	13
BP	GO:0002694	regulation of leukocyte activation	18/494	281/10468	0.116031	0.957229	0.957229	ZNF683/ATM/TYRO3/SOCS1/EXOSC6/ATAD5/AP3D1/ZFP36L2/CEBPB/RUNX1/HES1/LST1/AGER/HLA-DPB1/TNFRSF21/MYB/GNRH1/EFNB1	18
BP	GO:1903845	negative regulation of cellular response to transforming growth factor beta stimulus	5/494	55/10468	0.116554	0.957229	0.957229	BAMBI/SMURF2/DAND5/LTBP1/DLX1	5
BP	GO:0019935	cyclic-nucleotide-mediated signaling	6/494	71/10468	0.117605	0.957229	0.957229	PTGER3/GPR161/EIF4EBP2/PRKAR2A/UBE2B/GNAQ	6
BP	GO:0035825	homologous recombination	4/494	40/10468	0.118174	0.957229	0.957229	ATM/RAD51/MND1/UBE2B	4
BP	GO:0060993	kidney morphogenesis	4/494	40/10468	0.118174	0.957229	0.957229	PKD1/HES1/VEGFA/MYC	4
BP	GO:0042110	T cell activation	17/494	264/10468	0.119863	0.957229	0.957229	RPL22/ZNF683/SOCS1/AP3D1/ICAM1/ZFP36L2/CEBPB/RUNX1/HES1/AGER/HLA-DPB1/MICB/CCND3/TNFRSF21/MYB/GNRH1/EFNB1	17
BP	GO:0050863	regulation of T cell activation	12/494	174/10468	0.120663	0.957229	0.957229	ZNF683/SOCS1/AP3D1/CEBPB/RUNX1/HES1/AGER/HLA-DPB1/TNFRSF21/MYB/GNRH1/EFNB1	12
BP	GO:0046434	organophosphate catabolic process	13/494	192/10468	0.121351	0.957229	0.957229	ACOT7/HKDC1/ECD/ACAT1/UNG/NEIL1/HDDC3/DCTPP1/ALDOC/GDPD1/NUP85/SEC13/HINT1	13
BP	GO:0006913	nucleocytoplasmic transport	18/494	283/10468	0.121669	0.957229	0.957229	SRRM1/AHCYL1/PKD1/SMG1/YWHAE/NUP85/ANKLE1/SNRPG/POLDIP3/SEC13/LSG1/SDAD1/HSPA9/RBM22/CCHCR1/MAPK14/XPO7/GEMIN8	18
BP	GO:0001913	T cell mediated cytotoxicity	3/494	26/10468	0.121961	0.957229	0.957229	AGER/MICB/ULBP2	3
BP	GO:0006517	protein deglycosylation	3/494	26/10468	0.121961	0.957229	0.957229	UGGT1/MAN1A1/RNF139	3
BP	GO:0009584	detection of visible light	3/494	26/10468	0.121961	0.957229	0.957229	REEP6/RRH/GNAQ	3
BP	GO:0042551	neuron maturation	3/494	26/10468	0.121961	0.957229	0.957229	CDKN1C/TBX6/SPTBN4	3
BP	GO:0060563	neuroepithelial cell differentiation	3/494	26/10468	0.121961	0.957229	0.957229	CEBPB/HES1/SEC24B	3
BP	GO:0060675	ureteric bud morphogenesis	3/494	26/10468	0.121961	0.957229	0.957229	HES1/VEGFA/MYC	3
BP	GO:0060711	labyrinthine layer development	3/494	26/10468	0.121961	0.957229	0.957229	TMED2/HS6ST1/HES1	3
BP	GO:0072171	mesonephric tubule morphogenesis	3/494	26/10468	0.121961	0.957229	0.957229	HES1/VEGFA/MYC	3
BP	GO:0072529	pyrimidine-containing compound catabolic process	3/494	26/10468	0.121961	0.957229	0.957229	UNG/NEIL1/DCTPP1	3
BP	GO:0097502	mannosylation	3/494	26/10468	0.121961	0.957229	0.957229	ALG9/SDF2L1/PIGZ	3
BP	GO:2000351	regulation of endothelial cell apoptotic process	3/494	26/10468	0.121961	0.957229	0.957229	ICAM1/PAK4/FOXO3	3
BP	GO:0042098	T cell proliferation	8/494	105/10468	0.122535	0.957229	0.957229	CEBPB/HES1/AGER/HLA-DPB1/CCND3/TNFRSF21/GNRH1/EFNB1	8
BP	GO:0001779	natural killer cell differentiation	2/494	13/10468	0.123027	0.957229	0.957229	ZNF683/TYRO3	2
BP	GO:0002053	positive regulation of mesenchymal cell proliferation	2/494	13/10468	0.123027	0.957229	0.957229	VEGFA/MYC	2
BP	GO:0002115	store-operated calcium entry	2/494	13/10468	0.123027	0.957229	0.957229	STIM1/ORAI3	2
BP	GO:0002717	positive regulation of natural killer cell mediated immunity	2/494	13/10468	0.123027	0.957229	0.957229	MICB/ULBP2	2
BP	GO:0003338	metanephros morphogenesis	2/494	13/10468	0.123027	0.957229	0.957229	PKD1/HES1	2
BP	GO:0006268	DNA unwinding involved in DNA replication	2/494	13/10468	0.123027	0.957229	0.957229	RAD51/RECQL4	2
BP	GO:0007530	sex determination	2/494	13/10468	0.123027	0.957229	0.957229	CITED2/GNRH1	2
BP	GO:0009084	glutamine family amino acid biosynthetic process	2/494	13/10468	0.123027	0.957229	0.957229	GLUL/PYCR2	2
BP	GO:0010984	regulation of lipoprotein particle clearance	2/494	13/10468	0.123027	0.957229	0.957229	LRPAP1/MYLIP	2
BP	GO:0030033	microvillus assembly	2/494	13/10468	0.123027	0.957229	0.957229	RAP1GAP/TNIK	2
BP	GO:0042226	interleukin-6 biosynthetic process	2/494	13/10468	0.123027	0.957229	0.957229	CEBPB/AGER	2
BP	GO:0042559	pteridine-containing compound biosynthetic process	2/494	13/10468	0.123027	0.957229	0.957229	SPR/PCBD2	2
BP	GO:0042790	nucleolar large rRNA transcription by RNA polymerase I	2/494	13/10468	0.123027	0.957229	0.957229	PWP1/POLR1E	2
BP	GO:0045056	transcytosis	2/494	13/10468	0.123027	0.957229	0.957229	LRPAP1/AGER	2
BP	GO:0045686	negative regulation of glial cell differentiation	2/494	13/10468	0.123027	0.957229	0.957229	DLX1/HES1	2
BP	GO:0051315	attachment of mitotic spindle microtubules to kinetochore	2/494	13/10468	0.123027	0.957229	0.957229	CDT1/BOD1	2
BP	GO:0060037	pharyngeal system development	2/494	13/10468	0.123027	0.957229	0.957229	ACVR1/HES1	2
BP	GO:0060628	regulation of ER to Golgi vesicle-mediated transport	2/494	13/10468	0.123027	0.957229	0.957229	SEC24B/RNF139	2
BP	GO:0061158	3'-UTR-mediated mRNA destabilization	2/494	13/10468	0.123027	0.957229	0.957229	ZFP36/ZFP36L2	2
BP	GO:0070935	3'-UTR-mediated mRNA stabilization	2/494	13/10468	0.123027	0.957229	0.957229	ZFP36/MAPK14	2
BP	GO:0071027	nuclear RNA surveillance	2/494	13/10468	0.123027	0.957229	0.957229	EXOSC6/EXOSC2	2
BP	GO:0071028	nuclear mRNA surveillance	2/494	13/10468	0.123027	0.957229	0.957229	EXOSC6/EXOSC2	2
BP	GO:1902570	protein localization to nucleolus	2/494	13/10468	0.123027	0.957229	0.957229	GLUL/NVL	2
BP	GO:0071559	response to transforming growth factor beta	11/494	157/10468	0.123181	0.957229	0.957229	BAMBI/CDKN1C/RNF111/SMURF2/DAND5/LTBP1/ZFP36L2/ACVR1/DLX1/CITED2/HIPK2	11
BP	GO:0051961	negative regulation of nervous system development	12/494	175/10468	0.124359	0.957229	0.957229	GPR161/GDF11/TBX6/PTPRS/DLX1/HES1/CDKL3/MYLIP/TNFRSF21/FOXO3/PCM1/GNRH1	12
BP	GO:0001822	kidney development	10/494	140/10468	0.125304	0.957229	0.957229	CDKN1C/ACAT1/GDF11/PKD1/NUP85/ODC1/TIPARP/HES1/VEGFA/MYC	10
BP	GO:0046635	positive regulation of alpha-beta T cell activation	4/494	41/10468	0.126362	0.957229	0.957229	SOCS1/AP3D1/RUNX1/MYB	4
BP	GO:0009308	amine metabolic process	7/494	89/10468	0.126616	0.957229	0.957229	SRM/PSMD3/GDPD1/ODC1/PSME4/PSMF1/PSMB8	7
BP	GO:0030177	positive regulation of Wnt signaling pathway	9/494	123/10468	0.126826	0.957229	0.957229	BAMBI/GPRC5B/PSMD3/SMURF2/PSME4/USP34/PSMF1/UBE2B/PSMB8	9
BP	GO:0009416	response to light stimulus	14/494	212/10468	0.12829	0.957229	0.957229	DTL/FEN1/RBM4B/ERCC5/MEIS2/REEP6/DYNLRB1/HYAL1/CLOCK/RRH/UBE2B/MAPK13/MYC/GNAQ	14
BP	GO:0010608	posttranscriptional regulation of gene expression	29/494	493/10468	0.128754	0.957229	0.957229	RPL22/RPS6KA1/AGO1/NSUN4/SRP9/EIF4EBP2/RBM4B/ZC3H10/AJUBA/ZC3H14/EXOSC6/PSMD3/NUP85/TNRC6C/EEF2/CDC37/ZFP36/ZFP36L2/PSME4/PSMF1/POLDIP3/SEC13/CPEB4/PSMB8/MAPK14/FOXO3/RNF139/TRUB2/EXOSC2	29
BP	GO:0050865	regulation of cell activation	19/494	304/10468	0.128786	0.957229	0.957229	ZNF683/RPS6KA1/ATM/TYRO3/SOCS1/EXOSC6/ATAD5/AP3D1/ZFP36L2/CEBPB/RUNX1/HES1/LST1/AGER/HLA-DPB1/TNFRSF21/MYB/GNRH1/EFNB1	19
BP	GO:0060964	regulation of gene silencing by miRNA	6/494	73/10468	0.129569	0.957229	0.957229	AGO1/ZC3H10/AJUBA/NUP85/ZFP36/SEC13	6
BP	GO:0051169	nuclear transport	18/494	286/10468	0.130429	0.957229	0.957229	SRRM1/AHCYL1/PKD1/SMG1/YWHAE/NUP85/ANKLE1/SNRPG/POLDIP3/SEC13/LSG1/SDAD1/HSPA9/RBM22/CCHCR1/MAPK14/XPO7/GEMIN8	18
BP	GO:0048232	male gamete generation	19/494	305/10468	0.131669	0.957229	0.957229	TESK2/ARID4B/DUSP13/ATM/HERC2/TYRO3/CATSPER2/SNRPA1/SPATA20/PCSK4/ASF1B/SPDYA/PSME4/SPATA2/CLOCK/UBE2B/IMMP2L/TTC26/SPATA31C1	19
BP	GO:0043620	regulation of DNA-templated transcription in response to stress	8/494	107/10468	0.132429	0.957229	0.957229	RPS6KA1/PSMD3/PSME4/PSMF1/CEBPB/PSMB8/VEGFA/CITED2	8
BP	GO:0002009	morphogenesis of an epithelium	20/494	324/10468	0.132626	0.957229	0.957229	RNF207/MTHFR/TMED2/GPC6/AJUBA/PKD1/TBX6/PSMD3/SMURF2/AP2S1/RHOB/PSME4/ACVR1/PSMF1/CRYGS/HES1/SEC24B/PSMB8/VEGFA/MYC	20
BP	GO:0009880	embryonic pattern specification	3/494	27/10468	0.132664	0.957229	0.957229	TMED2/TBX6/EFNB1	3
BP	GO:0031440	regulation of mRNA 3'-end processing	3/494	27/10468	0.132664	0.957229	0.957229	AHCYL1/ZC3H14/SUPT5H	3
BP	GO:0032613	interleukin-10 production	3/494	27/10468	0.132664	0.957229	0.957229	TRIB2/AGER/TNFRSF21	3
BP	GO:0042558	pteridine-containing compound metabolic process	3/494	27/10468	0.132664	0.957229	0.957229	MTHFR/SPR/PCBD2	3
BP	GO:0045911	positive regulation of DNA recombination	3/494	27/10468	0.132664	0.957229	0.957229	EXOSC6/ATAD5/UBE2B	3
BP	GO:0051084	'de novo' posttranslational protein folding	3/494	27/10468	0.132664	0.957229	0.957229	UGGT1/CHCHD4/HSPA9	3
BP	GO:1903428	positive regulation of reactive oxygen species biosynthetic process	3/494	27/10468	0.132664	0.957229	0.957229	NOS1AP/ICAM1/FOXO3	3
BP	GO:0008089	anterograde axonal transport	4/494	42/10468	0.134781	0.957229	0.957229	AP3S2/SPG7/AP3D1/BLOC1S4	4
BP	GO:0001764	neuron migration	6/494	74/10468	0.135762	0.957229	0.957229	MARK2/YWHAE/IGSF10/VEGFA/PCM1/GNRH1	6
BP	GO:0030334	regulation of cell migration	27/494	458/10468	0.136408	0.957229	0.957229	NBL1/GLUL/ATM/AJUBA/TTBK2/TPM1/SMURF2/ICAM1/RHOB/ACVR1/AAMP/PPM1F/CAPN7/ELP6/PLXNB1/HYAL1/IGSF10/FGF18/AGER/MAPK14/VEGFA/FOXO3/CITED2/GNRH1/TRIB1/SCAI/RAP2C	27
BP	GO:0016126	sterol biosynthetic process	5/494	58/10468	0.137414	0.957229	0.957229	HSD17B7/LBR/GGPS1/SCAP/CYP51A1	5
BP	GO:0034754	cellular hormone metabolic process	5/494	58/10468	0.137414	0.957229	0.957229	DHRS3/HSD17B7/CYP17A1/CYP2S1/TIPARP	5
BP	GO:0001738	morphogenesis of a polarized epithelium	8/494	108/10468	0.137526	0.957229	0.957229	GPC6/PSMD3/SMURF2/AP2S1/PSME4/PSMF1/SEC24B/PSMB8	8
BP	GO:0050707	regulation of cytokine secretion	7/494	91/10468	0.137679	0.957229	0.957229	CD58/SOCS1/SERPINB1/AGER/MAPK14/TNFRSF21/LPL	7
BP	GO:0009743	response to carbohydrate	10/494	143/10468	0.138298	0.957229	0.957229	ENSA/MPC2/GLUL/CDT1/KAT7/ICAM1/AGER/MAPK13/FOXO3/LPL	10
BP	GO:0006397	mRNA processing	26/494	440/10468	0.139167	0.957229	0.957229	CDK11A/CDK11B/SRRM1/SFPQ/PRPF38A/AHCYL1/TTF2/ECD/PHRF1/RBM4B/ZC3H10/SART3/ZC3H14/SNRPA1/NSRP1/SUPT5H/SF3B6/SNRNP27/PCBP1/SNRPG/USP39/POLDIP3/RBM22/PRKRIP1/TRUB2/GEMIN8	26
BP	GO:0002691	regulation of cellular extravasation	2/494	14/10468	0.139236	0.957229	0.957229	ICAM1/AGER	2
BP	GO:0006595	polyamine metabolic process	2/494	14/10468	0.139236	0.957229	0.957229	SRM/ODC1	2
BP	GO:0007628	adult walking behavior	2/494	14/10468	0.139236	0.957229	0.957229	SPTBN4/HIPK2	2
BP	GO:0030325	adrenal gland development	2/494	14/10468	0.139236	0.957229	0.957229	CDKN1C/CITED2	2
BP	GO:0032925	regulation of activin receptor signaling pathway	2/494	14/10468	0.139236	0.957229	0.957229	DAND5/ACVR1	2
BP	GO:0035767	endothelial cell chemotaxis	2/494	14/10468	0.139236	0.957229	0.957229	FGF18/VEGFA	2
BP	GO:0042401	cellular biogenic amine biosynthetic process	2/494	14/10468	0.139236	0.957229	0.957229	SRM/ODC1	2
BP	GO:0060008	Sertoli cell differentiation	2/494	14/10468	0.139236	0.957229	0.957229	ARID4B/ICAM1	2
BP	GO:0002064	epithelial cell development	9/494	126/10468	0.140876	0.957229	0.957229	GSTM3/ARID4B/PTPRS/ICAM1/SIPA1L3/CLOCK/SEC24B/VEGFA/RAP2C	9
BP	GO:1903522	regulation of blood circulation	9/494	126/10468	0.140876	0.957229	0.957229	RNF207/AHCYL1/NOS1AP/STIM1/TPM1/YWHAE/ICAM1/SPTBN4/AGER	9
BP	GO:0050866	negative regulation of cell activation	8/494	109/10468	0.142719	0.957229	0.957229	ATM/TYRO3/SOCS1/CEBPB/RUNX1/LST1/TNFRSF21/GNRH1	8
BP	GO:0048002	antigen processing and presentation of peptide antigen	10/494	144/10468	0.142782	0.957229	0.957229	SEC23A/SNAP23/PSMD3/AP2S1/PSME4/PSMF1/SEC13/SEC24B/PSMB8/HLA-DPB1	10
BP	GO:0030203	glycosaminoglycan metabolic process	7/494	92/10468	0.143382	0.957229	0.957229	EXT2/GPC6/HS6ST1/GALNT5/HYAL1/PXYLP1/EGFLAM	7
BP	GO:0009953	dorsal/ventral pattern formation	4/494	43/10468	0.143421	0.957229	0.957229	NBL1/GPR161/EN1/ACVR1	4
BP	GO:0032755	positive regulation of interleukin-6 production	4/494	43/10468	0.143421	0.957229	0.957229	TBC1D23/AGER/MAPK13/LPL	4
BP	GO:0043525	positive regulation of neuron apoptotic process	4/494	43/10468	0.143421	0.957229	0.957229	MCL1/ATM/FOXO3/MYB	4
BP	GO:0009394	2'-deoxyribonucleotide metabolic process	3/494	28/10468	0.14368	0.957229	0.957229	UNG/NEIL1/DCTPP1	3
BP	GO:0021532	neural tube patterning	3/494	28/10468	0.14368	0.957229	0.957229	GPR161/EN1/HES1	3
BP	GO:0051693	actin filament capping	3/494	28/10468	0.14368	0.957229	0.957229	LMOD1/SPTBN4/CAPG	3
BP	GO:1901016	regulation of potassium ion transmembrane transporter activity	3/494	28/10468	0.14368	0.957229	0.957229	RNF207/NOS1AP/YWHAE	3
BP	GO:0007159	leukocyte cell-cell adhesion	12/494	180/10468	0.143778	0.957229	0.957229	SOCS1/AP3D1/ICAM1/CEBPB/RUNX1/HES1/AGER/HLA-DPB1/TNFRSF21/MYB/GNRH1/EFNB1	12
BP	GO:0019933	cAMP-mediated signaling	5/494	59/10468	0.144711	0.957229	0.957229	PTGER3/GPR161/EIF4EBP2/UBE2B/GNAQ	5
BP	GO:0042035	regulation of cytokine biosynthetic process	5/494	59/10468	0.144711	0.957229	0.957229	ZFP36/TRIB2/CEBPB/LTB/AGER	5
BP	GO:0050868	negative regulation of T cell activation	5/494	59/10468	0.144711	0.957229	0.957229	SOCS1/CEBPB/RUNX1/TNFRSF21/GNRH1	5
BP	GO:1905114	cell surface receptor signaling pathway involved in cell-cell signaling	23/494	385/10468	0.144895	0.957229	0.957229	AGO1/BAMBI/GRK5/MARK2/GPC6/TYRO3/PKD1/GPRC5B/BRD7/PSMD3/SMURF2/TNRC6C/AP2S1/PSME4/USP34/PSMF1/RUNX1/TNIK/UBE2B/PSMB8/MAPK14/FOXO3/GNAQ	23
BP	GO:0002440	production of molecular mediator of immune response	9/494	127/10468	0.14573	0.957229	0.957229	ATM/UNG/GPRC5B/EXOSC6/ATAD5/MAPK14/PMS2/PMS2P1/NBN	9
BP	GO:0060147	regulation of posttranscriptional gene silencing	6/494	76/10468	0.148556	0.957229	0.957229	AGO1/ZC3H10/AJUBA/NUP85/ZFP36/SEC13	6
BP	GO:0060966	regulation of gene silencing by RNA	6/494	76/10468	0.148556	0.957229	0.957229	AGO1/ZC3H10/AJUBA/NUP85/ZFP36/SEC13	6
BP	GO:0022408	negative regulation of cell-cell adhesion	7/494	93/10468	0.149196	0.957229	0.957229	SOCS1/CEBPB/RUNX1/PPM1F/VEGFA/TNFRSF21/GNRH1	7
BP	GO:0000077	DNA damage checkpoint	9/494	128/10468	0.150667	0.957229	0.957229	CLSPN/PLK3/DTL/INTS7/ATM/ARID3A/CLOCK/MAPK14/NBN	9
BP	GO:0007179	transforming growth factor beta receptor signaling pathway	9/494	128/10468	0.150667	0.957229	0.957229	BAMBI/CDKN1C/RNF111/SMURF2/DAND5/LTBP1/ACVR1/CITED2/HIPK2	9
BP	GO:0072001	renal system development	10/494	146/10468	0.151973	0.957229	0.957229	CDKN1C/ACAT1/GDF11/PKD1/NUP85/ODC1/TIPARP/HES1/VEGFA/MYC	10
BP	GO:0001676	long-chain fatty acid metabolic process	5/494	60/10468	0.152171	0.957229	0.957229	ACOT7/ASAH2B/CYP2S1/TBXAS1/SLC27A4	5
BP	GO:0002479	antigen processing and presentation of exogenous peptide antigen via MHC class I, TAP-dependent	5/494	60/10468	0.152171	0.957229	0.957229	SNAP23/PSMD3/PSME4/PSMF1/PSMB8	5
BP	GO:0008088	axo-dendritic transport	5/494	60/10468	0.152171	0.957229	0.957229	SFPQ/AP3S2/SPG7/AP3D1/BLOC1S4	5
BP	GO:0072332	intrinsic apoptotic signaling pathway by p53 class mediator	5/494	60/10468	0.152171	0.957229	0.957229	RPL11/RRN3/ATAD5/HINT1/HIPK2	5
BP	GO:0031349	positive regulation of defense response	18/494	293/10468	0.152258	0.957229	0.957229	SFPQ/PTGER3/PSPC1/TYRO3/GPRC5B/PSMD3/EPG5/PTPRS/PSME4/PSMF1/CEBPB/CLOCK/PSMB8/MICB/MAPK13/ULBP2/LPL/LRRC14	18
BP	GO:0001523	retinoid metabolic process	4/494	44/10468	0.152273	0.957229	0.957229	DHRS3/GPC6/CYP2S1/LPL	4
BP	GO:0001657	ureteric bud development	4/494	44/10468	0.152273	0.957229	0.957229	GDF11/HES1/VEGFA/MYC	4
BP	GO:2000059	negative regulation of ubiquitin-dependent protein catabolic process	4/494	44/10468	0.152273	0.957229	0.957229	RPL11/TLK2/CAMLG/HIPK2	4
BP	GO:0021700	developmental maturation	11/494	164/10468	0.152321	0.957229	0.957229	CDKN1C/GDF11/CATSPER2/TBX6/PCSK4/AP3D1/SPTBN4/PLXNB1/HES1/VEGFA/FOXO3	11
BP	GO:0070848	response to growth factor	25/494	426/10468	0.152531	0.957229	0.957229	NBL1/SORT1/BAMBI/CDKN1C/ARPC3/MEIS2/RNF111/SMURF2/EEF2/DAND5/ZFP36/LTBP1/ZFP36L2/ACVR1/DLX1/HYAL1/HES1/FGF18/MAPK14/FRS3/VEGFA/FOXO3/CITED2/HIPK2/MYC	25
BP	GO:0003407	neural retina development	3/494	29/10468	0.154985	0.957229	0.957229	FJX1/DLX1/HIPK2	3
BP	GO:0006891	intra-Golgi vesicle-mediated transport	3/494	29/10468	0.154985	0.957229	0.957229	GOSR1/COG1/NAPG	3
BP	GO:0009583	detection of light stimulus	3/494	29/10468	0.154985	0.957229	0.957229	REEP6/RRH/GNAQ	3
BP	GO:0071674	mononuclear cell migration	3/494	29/10468	0.154985	0.957229	0.957229	NBL1/AGER/MAPK14	3
BP	GO:0072577	endothelial cell apoptotic process	3/494	29/10468	0.154985	0.957229	0.957229	ICAM1/PAK4/FOXO3	3
BP	GO:2001259	positive regulation of cation channel activity	3/494	29/10468	0.154985	0.957229	0.957229	RNF207/NOS1AP/STIM1	3
BP	GO:0044774	mitotic DNA integrity checkpoint	7/494	94/10468	0.15512	0.957229	0.957229	CLSPN/PLK3/ORC1/ATM/CDC6/ARID3A/NBN	7
BP	GO:0046718	viral entry into host cell	6/494	77/10468	0.15515	0.957229	0.957229	VPS18/TYRO3/ICAM1/HYAL1/ZNF639/GYPA	6
BP	GO:0001709	cell fate determination	2/494	15/10468	0.15587	0.957229	0.957229	MCL1/HES1	2
BP	GO:0001945	lymph vessel development	2/494	15/10468	0.15587	0.957229	0.957229	PKD1/VEGFA	2
BP	GO:0003156	regulation of animal organ formation	2/494	15/10468	0.15587	0.957229	0.957229	HES1/CITED2	2
BP	GO:0006744	ubiquinone biosynthetic process	2/494	15/10468	0.15587	0.957229	0.957229	COQ2/COQ4	2
BP	GO:0006895	Golgi to endosome transport	2/494	15/10468	0.15587	0.957229	0.957229	SORT1/WIPI1	2
BP	GO:0009309	amine biosynthetic process	2/494	15/10468	0.15587	0.957229	0.957229	SRM/ODC1	2
BP	GO:0015936	coenzyme A metabolic process	2/494	15/10468	0.15587	0.957229	0.957229	ACOT7/ACAT1	2
BP	GO:0016074	snoRNA metabolic process	2/494	15/10468	0.15587	0.957229	0.957229	EXOSC6/EXOSC2	2
BP	GO:0018195	peptidyl-arginine modification	2/494	15/10468	0.15587	0.957229	0.957229	NDUFAF7/FBXO11	2
BP	GO:0031065	positive regulation of histone deacetylation	2/494	15/10468	0.15587	0.957229	0.957229	C6orf89/VEGFA	2
BP	GO:0048246	macrophage chemotaxis	2/494	15/10468	0.15587	0.957229	0.957229	NUP85/MAPK14	2
BP	GO:0050427	3'-phosphoadenosine 5'-phosphosulfate metabolic process	2/494	15/10468	0.15587	0.957229	0.957229	SULT1A3/SULT1A4	2
BP	GO:0051894	positive regulation of focal adhesion assembly	2/494	15/10468	0.15587	0.957229	0.957229	PPM1F/VEGFA	2
BP	GO:0071025	RNA surveillance	2/494	15/10468	0.15587	0.957229	0.957229	EXOSC6/EXOSC2	2
BP	GO:0072210	metanephric nephron development	2/494	15/10468	0.15587	0.957229	0.957229	PKD1/HES1	2
BP	GO:1901663	quinone biosynthetic process	2/494	15/10468	0.15587	0.957229	0.957229	COQ2/COQ4	2
BP	GO:1902254	negative regulation of intrinsic apoptotic signaling pathway by p53 class mediator	2/494	15/10468	0.15587	0.957229	0.957229	RRN3/ATAD5	2
BP	GO:1904380	endoplasmic reticulum mannose trimming	2/494	15/10468	0.15587	0.957229	0.957229	UGGT1/RNF139	2
BP	GO:0043393	regulation of protein binding	10/494	147/10468	0.156678	0.957229	0.957229	RPL11/PTPRF/NVL/BAMBI/MARK2/TTBK2/PKD1/PLCL1/LRPAP1/HIPK2	10
BP	GO:0000819	sister chromatid segregation	11/494	165/10468	0.156752	0.957229	0.957229	SFPQ/MSTO1/FEN1/ATM/NUSAP1/CDT1/CDC6/STAG1/PDS5A/BOD1/STAG3L2	11
BP	GO:0060541	respiratory system development	8/494	112/10468	0.158871	0.957229	0.957229	PKD1/HS6ST1/HES1/SEC24B/FGF18/VEGFA/AIMP2/ZFPM2	8
BP	GO:0070646	protein modification by small protein removal	15/494	239/10468	0.159298	0.957229	0.957229	CLSPN/TOMM20/DESI2/SART3/PSMD3/ATXN7L3/SMURF2/PSME4/USP34/USP39/PSMF1/SPATA2/ATXN7/PSMB8/MYC	15
BP	GO:0033238	regulation of cellular amine metabolic process	5/494	61/10468	0.159788	0.957229	0.957229	PSMD3/ODC1/PSME4/PSMF1/PSMB8	5
BP	GO:0071824	protein-DNA complex subunit organization	12/494	184/10468	0.160411	0.957229	0.957229	SMARCC2/SART3/ERCC5/RAD51/OIP5/RRN3/CDT1/ASF1B/PSME4/SHPRH/MYC/POLR1E	12
BP	GO:0070555	response to interleukin-1	9/494	130/10468	0.160787	0.957229	0.957229	MTHFR/PSMD3/ICAM1/PSME4/PSMF1/CEBPB/HYAL1/PSMB8/MAPK13	9
BP	GO:0038034	signal transduction in absence of ligand	4/494	45/10468	0.161326	0.957229	0.957229	IFI6/MCL1/UNC5B/FOXO3	4
BP	GO:0045652	regulation of megakaryocyte differentiation	4/494	45/10468	0.161326	0.957229	0.957229	AGO1/SETD1A/TNRC6C/RUNX1	4
BP	GO:0071230	cellular response to amino acid stimulus	4/494	45/10468	0.161326	0.957229	0.957229	SOCS1/RPTOR/CEBPB/CPEB4	4
BP	GO:0097192	extrinsic apoptotic signaling pathway in absence of ligand	4/494	45/10468	0.161326	0.957229	0.957229	IFI6/MCL1/UNC5B/FOXO3	4
BP	GO:0001568	blood vessel development	22/494	372/10468	0.162306	0.957229	0.957229	AGO1/GLUL/UNC5B/STIM1/TMED2/PKD1/PAK4/RHOB/LTBP1/HS6ST1/ACVR1/AAMP/RUNX1/HYAL1/TIPARP/HES1/SEC24B/FGF18/MAPK14/VEGFA/HIPK2/ZFPM2	22
BP	GO:0051606	detection of stimulus	8/494	113/10468	0.164439	0.957229	0.957229	DTL/STIM1/PKD1/PIEZO1/REEP6/RRH/UBE2B/GNAQ	8
BP	GO:0006576	cellular biogenic amine metabolic process	3/494	30/10468	0.166557	0.957229	0.957229	SRM/GDPD1/ODC1	3
BP	GO:0014009	glial cell proliferation	3/494	30/10468	0.166557	0.957229	0.957229	EEF2/HES1/MYB	3
BP	GO:0019692	deoxyribose phosphate metabolic process	3/494	30/10468	0.166557	0.957229	0.957229	UNG/NEIL1/DCTPP1	3
BP	GO:0035082	axoneme assembly	3/494	30/10468	0.166557	0.957229	0.957229	TEKT2/UBE2B/TTC26	3
BP	GO:0032101	regulation of response to external stimulus	24/494	412/10468	0.167134	0.957229	0.957229	NBL1/PTPRF/ARTN/PTGER3/CR1L/ATM/TYRO3/GPRC5B/PTPRS/SPATA2/CEBPB/PPM1F/TBC1D23/CLOCK/ELMOD2/FGF18/AGER/MICB/MAPK14/MAPK13/VEGFA/RNF216/LPL/TRIB1	24
BP	GO:0031098	stress-activated protein kinase signaling cascade	13/494	204/10468	0.167331	0.957229	0.957229	MAP4K5/KAT7/PAK4/ZFP36/TNIK/AGER/MAPK14/MAPK13/VEGFA/KLHDC10/HIPK2/TRIB1/MYC	13
BP	GO:0000380	alternative mRNA splicing, via spliceosome	5/494	62/10468	0.167557	0.957229	0.957229	SFPQ/RBM4B/ZC3H10/SART3/NSRP1	5
BP	GO:1903051	negative regulation of proteolysis involved in cellular protein catabolic process	5/494	62/10468	0.167557	0.957229	0.957229	RPL11/TLK2/PSMF1/CAMLG/HIPK2	5
BP	GO:1904019	epithelial cell apoptotic process	5/494	62/10468	0.167557	0.957229	0.957229	SORT1/ICAM1/PAK4/ZFP36/FOXO3	5
BP	GO:0001944	vasculature development	23/494	393/10468	0.167811	0.957229	0.957229	AGO1/GLUL/UNC5B/STIM1/TMED2/PKD1/PAK4/RHOB/LTBP1/HS6ST1/ACVR1/AAMP/RUNX1/HYAL1/TIPARP/HES1/SEC24B/FGF18/MAPK14/VEGFA/IMMP2L/HIPK2/ZFPM2	23
BP	GO:0017148	negative regulation of translation	8/494	114/10468	0.170096	0.957229	0.957229	AGO1/SRP9/EIF4EBP2/TNRC6C/ZFP36/ZFP36L2/CPEB4/RNF139	8
BP	GO:0050870	positive regulation of T cell activation	8/494	114/10468	0.170096	0.957229	0.957229	SOCS1/AP3D1/RUNX1/HES1/AGER/HLA-DPB1/MYB/EFNB1	8
BP	GO:0071347	cellular response to interleukin-1	8/494	114/10468	0.170096	0.957229	0.957229	PSMD3/ICAM1/PSME4/PSMF1/CEBPB/HYAL1/PSMB8/MAPK13	8
BP	GO:0042136	neurotransmitter biosynthetic process	4/494	46/10468	0.17057	0.957229	0.957229	NOS1AP/ICAM1/SPR/GAD1	4
BP	GO:0046427	positive regulation of JAK-STAT cascade	4/494	46/10468	0.17057	0.957229	0.957229	SOCS1/CRLF3/PARP14/HES1	4
BP	GO:0046854	phosphatidylinositol phosphorylation	4/494	46/10468	0.17057	0.957229	0.957229	PI4KB/SOCS1/SMG1/PIP5K1C	4
BP	GO:0006403	RNA localization	13/494	205/10468	0.171517	0.957229	0.957229	SRRM1/SFPQ/TOMM20/ATM/NPIPA1/SMG1/NUP85/ZFP36/POLDIP3/SEC13/SDAD1/XPO7/EXOSC2	13
BP	GO:0051650	establishment of vesicle localization	13/494	205/10468	0.171517	0.957229	0.957229	TMED2/SEC23A/VPS18/SNAP23/AP3S2/GOSR1/WIPI1/AP3D1/PIP5K1C/SEC13/TBC1D23/BLOC1S4/SEC24B	13
BP	GO:0010948	negative regulation of cell cycle process	17/494	280/10468	0.172193	0.957229	0.957229	CLSPN/PLK3/ORC1/DTL/ATM/RAD51/BRD7/CDT1/PSMD3/CDC6/ARID3A/ZFP36L2/PSME4/PSMF1/PSMB8/NBN/FBXO43	17
BP	GO:0006402	mRNA catabolic process	19/494	318/10468	0.172507	0.957229	0.957229	RPL22/MRTO4/RPL11/AGO1/RPS27/ATM/RPL41/ZC3H14/SMG1/EXOSC6/PSMD3/TNRC6C/ZFP36/ZFP36L2/PSME4/PSMF1/PSMB8/MAPK14/EXOSC2	19
BP	GO:0001832	blastocyst growth	2/494	16/10468	0.172854	0.957229	0.957229	TAF8/NBN	2
BP	GO:0003230	cardiac atrium development	2/494	16/10468	0.172854	0.957229	0.957229	DAND5/ACVR1	2
BP	GO:0006516	glycoprotein catabolic process	2/494	16/10468	0.172854	0.957229	0.957229	FBXO2/FBXO44	2
BP	GO:0006534	cysteine metabolic process	2/494	16/10468	0.172854	0.957229	0.957229	AHCYL1/AHCYL2	2
BP	GO:0006743	ubiquinone metabolic process	2/494	16/10468	0.172854	0.957229	0.957229	COQ2/COQ4	2
BP	GO:0008210	estrogen metabolic process	2/494	16/10468	0.172854	0.957229	0.957229	HSD17B7/TIPARP	2
BP	GO:0032897	negative regulation of viral transcription	2/494	16/10468	0.172854	0.957229	0.957229	ZFP36/ZNF639	2
BP	GO:0042491	inner ear auditory receptor cell differentiation	2/494	16/10468	0.172854	0.957229	0.957229	HES1/SEC24B	2
BP	GO:0043981	histone H4-K5 acetylation	2/494	16/10468	0.172854	0.957229	0.957229	KANSL2/KAT7	2
BP	GO:0043982	histone H4-K8 acetylation	2/494	16/10468	0.172854	0.957229	0.957229	KANSL2/KAT7	2
BP	GO:0044331	cell-cell adhesion mediated by cadherin	2/494	16/10468	0.172854	0.957229	0.957229	PPM1F/VEGFA	2
BP	GO:0045830	positive regulation of isotype switching	2/494	16/10468	0.172854	0.957229	0.957229	EXOSC6/ATAD5	2
BP	GO:0060045	positive regulation of cardiac muscle cell proliferation	2/494	16/10468	0.172854	0.957229	0.957229	MAPK14/ZFPM2	2
BP	GO:0060122	inner ear receptor cell stereocilium organization	2/494	16/10468	0.172854	0.957229	0.957229	HES1/SEC24B	2
BP	GO:0070131	positive regulation of mitochondrial translation	2/494	16/10468	0.172854	0.957229	0.957229	NSUN4/TRUB2	2
BP	GO:0086005	ventricular cardiac muscle cell action potential	2/494	16/10468	0.172854	0.957229	0.957229	RNF207/NOS1AP	2
BP	GO:0090659	walking behavior	2/494	16/10468	0.172854	0.957229	0.957229	SPTBN4/HIPK2	2
BP	GO:1900363	regulation of mRNA polyadenylation	2/494	16/10468	0.172854	0.957229	0.957229	ZC3H14/SUPT5H	2
BP	GO:1903523	negative regulation of blood circulation	2/494	16/10468	0.172854	0.957229	0.957229	SPTBN4/AGER	2
BP	GO:1904385	cellular response to angiotensin	2/494	16/10468	0.172854	0.957229	0.957229	AHCYL1/CDC6	2
BP	GO:2000352	negative regulation of endothelial cell apoptotic process	2/494	16/10468	0.172854	0.957229	0.957229	ICAM1/PAK4	2
BP	GO:0060828	regulation of canonical Wnt signaling pathway	12/494	187/10468	0.173501	0.957229	0.957229	BAMBI/GPRC5B/PSMD3/SMURF2/PSME4/USP34/PSMF1/UBE2B/PSMB8/MAPK14/FOXO3/GNAQ	12
BP	GO:0006022	aminoglycan metabolic process	7/494	97/10468	0.173523	0.957229	0.957229	EXT2/GPC6/HS6ST1/GALNT5/HYAL1/PXYLP1/EGFLAM	7
BP	GO:0006333	chromatin assembly or disassembly	7/494	97/10468	0.173523	0.957229	0.957229	SMARCC2/SART3/OIP5/TLK2/ASF1B/SHPRH/GATAD1	7
BP	GO:0050657	nucleic acid transport	11/494	169/10468	0.175113	0.957229	0.957229	SRRM1/SFPQ/TOMM20/NPIPA1/SMG1/NUP85/ZFP36/POLDIP3/SEC13/SDAD1/XPO7	11
BP	GO:0050658	RNA transport	11/494	169/10468	0.175113	0.957229	0.957229	SRRM1/SFPQ/TOMM20/NPIPA1/SMG1/NUP85/ZFP36/POLDIP3/SEC13/SDAD1/XPO7	11
BP	GO:0034333	adherens junction assembly	5/494	63/10468	0.175471	0.957229	0.957229	TESK2/AJUBA/PIP5K1C/PPM1F/VEGFA	5
BP	GO:0042089	cytokine biosynthetic process	5/494	63/10468	0.175471	0.957229	0.957229	ZFP36/TRIB2/CEBPB/LTB/AGER	5
BP	GO:0042107	cytokine metabolic process	5/494	63/10468	0.175471	0.957229	0.957229	ZFP36/TRIB2/CEBPB/LTB/AGER	5
BP	GO:0033135	regulation of peptidyl-serine phosphorylation	6/494	80/10468	0.175678	0.957229	0.957229	PWP1/RPTOR/SPTBN4/PLCL1/PPM1F/VEGFA	6
BP	GO:0097529	myeloid leukocyte migration	6/494	80/10468	0.175678	0.957229	0.957229	NBL1/NUP85/PIP5K1C/AGER/MAPK14/VEGFA	6
BP	GO:0043488	regulation of mRNA stability	10/494	151/10468	0.176205	0.957229	0.957229	ZC3H14/EXOSC6/PSMD3/ZFP36/ZFP36L2/PSME4/PSMF1/PSMB8/MAPK14/EXOSC2	10
BP	GO:0045765	regulation of angiogenesis	10/494	151/10468	0.176205	0.957229	0.957229	AGO1/GLUL/STIM1/PAK4/RHOB/RUNX1/HYAL1/FGF18/VEGFA/HIPK2	10
BP	GO:0006479	protein methylation	9/494	133/10468	0.176559	0.957229	0.957229	MTHFR/ARID4B/PWP1/SETD1A/NDUFAF7/FBXO11/MYB/PHF19/NTMT1	9
BP	GO:0008213	protein alkylation	9/494	133/10468	0.176559	0.957229	0.957229	MTHFR/ARID4B/PWP1/SETD1A/NDUFAF7/FBXO11/MYB/PHF19/NTMT1	9
BP	GO:0030336	negative regulation of cell migration	9/494	133/10468	0.176559	0.957229	0.957229	NBL1/TPM1/RHOB/FOXO3/CITED2/GNRH1/TRIB1/SCAI/RAP2C	9
BP	GO:0006458	'de novo' protein folding	3/494	31/10468	0.178372	0.957229	0.957229	UGGT1/CHCHD4/HSPA9	3
BP	GO:0030835	negative regulation of actin filament depolymerization	3/494	31/10468	0.178372	0.957229	0.957229	LMOD1/SPTBN4/CAPG	3
BP	GO:0044273	sulfur compound catabolic process	3/494	31/10468	0.178372	0.957229	0.957229	ACOT7/ACAT1/HYAL1	3
BP	GO:0060976	coronary vasculature development	3/494	31/10468	0.178372	0.957229	0.957229	LTBP1/SEC24B/VEGFA	3
BP	GO:0048514	blood vessel morphogenesis	19/494	320/10468	0.179327	0.957229	0.957229	AGO1/GLUL/UNC5B/STIM1/PAK4/RHOB/HS6ST1/ACVR1/AAMP/RUNX1/HYAL1/TIPARP/HES1/SEC24B/FGF18/MAPK14/VEGFA/HIPK2/ZFPM2	19
BP	GO:0034605	cellular response to heat	7/494	98/10468	0.179859	0.957229	0.957229	CLPB/ATM/YWHAE/NUP85/RPTOR/SEC13/HSPA9	7
BP	GO:0043524	negative regulation of neuron apoptotic process	7/494	98/10468	0.179859	0.957229	0.957229	UNC5B/TYRO3/EN1/DLX1/CEBPB/CPEB4/HIPK2	7
BP	GO:0061013	regulation of mRNA catabolic process	11/494	170/10468	0.179859	0.957229	0.957229	ZC3H14/EXOSC6/PSMD3/TNRC6C/ZFP36/ZFP36L2/PSME4/PSMF1/PSMB8/MAPK14/EXOSC2	11
BP	GO:0016101	diterpenoid metabolic process	4/494	47/10468	0.179994	0.957229	0.957229	DHRS3/GPC6/CYP2S1/LPL	4
BP	GO:0042102	positive regulation of T cell proliferation	4/494	47/10468	0.179994	0.957229	0.957229	HES1/AGER/HLA-DPB1/EFNB1	4
BP	GO:1904894	positive regulation of STAT cascade	4/494	47/10468	0.179994	0.957229	0.957229	SOCS1/CRLF3/PARP14/HES1	4
BP	GO:0006260	DNA replication	15/494	245/10468	0.182423	0.957229	0.957229	CLSPN/ORC1/DTL/FEN1/ATM/CDK2AP1/RAD51/CDT1/ATAD5/CDC6/KAT7/PDS5A/PRIM2/NBN/RECQL4	15
BP	GO:0007259	JAK-STAT cascade	6/494	81/10468	0.182756	0.957229	0.957229	PWP1/PKD1/SOCS1/CRLF3/PARP14/HES1	6
BP	GO:0045185	maintenance of protein location	6/494	81/10468	0.182756	0.957229	0.957229	NBL1/PKD1/DAND5/SPTBN4/LTBP1/TAF8	6
BP	GO:2000241	regulation of reproductive process	6/494	81/10468	0.182756	0.957229	0.957229	SMURF2/UBE2B/CITED2/GNRH1/FBXO43/ZFPM2	6
BP	GO:0042590	antigen processing and presentation of exogenous peptide antigen via MHC class I	5/494	64/10468	0.183525	0.957229	0.957229	SNAP23/PSMD3/PSME4/PSMF1/PSMB8	5
BP	GO:0044786	cell cycle DNA replication	5/494	64/10468	0.183525	0.957229	0.957229	FEN1/RAD51/CDT1/ATAD5/PRIM2	5
BP	GO:0006066	alcohol metabolic process	14/494	227/10468	0.185651	0.957229	0.957229	DHRS3/HSD17B7/LBR/GGPS1/ASAH2B/CYP2R1/SULT1A3/GDPD1/SPR/PLCL1/SCAP/COQ2/PCBD2/CYP51A1	14
BP	GO:0072358	cardiovascular system development	23/494	399/10468	0.186221	0.957229	0.957229	AGO1/GLUL/UNC5B/STIM1/TMED2/PKD1/PAK4/RHOB/LTBP1/HS6ST1/ACVR1/AAMP/RUNX1/HYAL1/TIPARP/HES1/SEC24B/FGF18/MAPK14/VEGFA/IMMP2L/HIPK2/ZFPM2	23
BP	GO:0051348	negative regulation of transferase activity	13/494	209/10468	0.188774	0.957229	0.957229	RPL11/CDKN1C/AJUBA/SOCS1/RPTOR/MIDN/ZFP36/TRIB2/PPM1F/PRKAR2A/PRKRIP1/TRIB1/GNAQ	13
BP	GO:1901214	regulation of neuron death	13/494	209/10468	0.188774	0.957229	0.957229	MCL1/UNC5B/ATM/TYRO3/SULT1A3/EN1/DLX1/CEBPB/CPEB4/FOXO3/MYB/AIMP2/HIPK2	13
BP	GO:0006401	RNA catabolic process	20/494	342/10468	0.189111	0.957229	0.957229	RPL22/MRTO4/RPL11/AGO1/RPS27/FEN1/ATM/RPL41/ZC3H14/SMG1/EXOSC6/PSMD3/TNRC6C/ZFP36/ZFP36L2/PSME4/PSMF1/PSMB8/MAPK14/EXOSC2	20
BP	GO:0002312	B cell activation involved in immune response	4/494	48/10468	0.189587	0.957229	0.957229	UNG/EXOSC6/ATAD5/NBN	4
BP	GO:0060191	regulation of lipase activity	4/494	48/10468	0.189587	0.957229	0.957229	SORT1/ARL1/LPL/GNAQ	4
BP	GO:0006953	acute-phase response	2/494	17/10468	0.190117	0.957229	0.957229	PTGER3/CEBPB	2
BP	GO:0009065	glutamine family amino acid catabolic process	2/494	17/10468	0.190117	0.957229	0.957229	GLUL/GAD1	2
BP	GO:0016075	rRNA catabolic process	2/494	17/10468	0.190117	0.957229	0.957229	EXOSC6/EXOSC2	2
BP	GO:0016226	iron-sulfur cluster assembly	2/494	17/10468	0.190117	0.957229	0.957229	ISCU/HSPA9	2
BP	GO:0016254	preassembly of GPI anchor in ER membrane	2/494	17/10468	0.190117	0.957229	0.957229	PIGC/PIGZ	2
BP	GO:0031163	metallo-sulfur cluster assembly	2/494	17/10468	0.190117	0.957229	0.957229	ISCU/HSPA9	2
BP	GO:0034162	toll-like receptor 9 signaling pathway	2/494	17/10468	0.190117	0.957229	0.957229	EPG5/PTPRS	2
BP	GO:0035886	vascular smooth muscle cell differentiation	2/494	17/10468	0.190117	0.957229	0.957229	HES1/VEGFA	2
BP	GO:0042269	regulation of natural killer cell mediated cytotoxicity	2/494	17/10468	0.190117	0.957229	0.957229	MICB/ULBP2	2
BP	GO:0042759	long-chain fatty acid biosynthetic process	2/494	17/10468	0.190117	0.957229	0.957229	ACOT7/ASAH2B	2
BP	GO:0046426	negative regulation of JAK-STAT cascade	2/494	17/10468	0.190117	0.957229	0.957229	SOCS1/PARP14	2
BP	GO:0050982	detection of mechanical stimulus	2/494	17/10468	0.190117	0.957229	0.957229	PKD1/PIEZO1	2
BP	GO:0070262	peptidyl-serine dephosphorylation	2/494	17/10468	0.190117	0.957229	0.957229	YWHAE/PPM1F	2
BP	GO:0098901	regulation of cardiac muscle cell action potential	2/494	17/10468	0.190117	0.957229	0.957229	RNF207/NOS1AP	2
BP	GO:1904893	negative regulation of STAT cascade	2/494	17/10468	0.190117	0.957229	0.957229	SOCS1/PARP14	2
BP	GO:0000096	sulfur amino acid metabolic process	3/494	32/10468	0.190407	0.957229	0.957229	MTHFR/AHCYL1/AHCYL2	3
BP	GO:0009262	deoxyribonucleotide metabolic process	3/494	32/10468	0.190407	0.957229	0.957229	UNG/NEIL1/DCTPP1	3
BP	GO:0031952	regulation of protein autophosphorylation	3/494	32/10468	0.190407	0.957229	0.957229	VEGFA/NBN/RAP2C	3
BP	GO:0032435	negative regulation of proteasomal ubiquitin-dependent protein catabolic process	3/494	32/10468	0.190407	0.957229	0.957229	RPL11/TLK2/CAMLG	3
BP	GO:0032655	regulation of interleukin-12 production	3/494	32/10468	0.190407	0.957229	0.957229	LTB/AGER/MAPK14	3
BP	GO:0042130	negative regulation of T cell proliferation	3/494	32/10468	0.190407	0.957229	0.957229	CEBPB/TNFRSF21/GNRH1	3
BP	GO:0043370	regulation of CD4-positive, alpha-beta T cell differentiation	3/494	32/10468	0.190407	0.957229	0.957229	SOCS1/RUNX1/MYB	3
BP	GO:0048146	positive regulation of fibroblast proliferation	3/494	32/10468	0.190407	0.957229	0.957229	CDC6/MYB/MYC	3
BP	GO:0086001	cardiac muscle cell action potential	3/494	32/10468	0.190407	0.957229	0.957229	RNF207/NOS1AP/YWHAE	3
BP	GO:0051251	positive regulation of lymphocyte activation	10/494	154/10468	0.191561	0.957229	0.957229	SOCS1/EXOSC6/ATAD5/AP3D1/RUNX1/HES1/AGER/HLA-DPB1/MYB/EFNB1	10
BP	GO:0061337	cardiac conduction	5/494	65/10468	0.191712	0.957229	0.957229	RNF207/AHCYL1/STIM1/YWHAE/SPTBN4	5
BP	GO:2001237	negative regulation of extrinsic apoptotic signaling pathway	5/494	65/10468	0.191712	0.957229	0.957229	IFI6/MCL1/UNC5B/ICAM1/ACVR1	5
BP	GO:0071229	cellular response to acid chemical	8/494	118/10468	0.193576	0.957229	0.957229	ATM/SOCS1/RPTOR/CEBPB/CPEB4/VEGFA/MYB/LPL	8
BP	GO:0042254	ribosome biogenesis	16/494	267/10468	0.194669	0.957229	0.957229	MRTO4/RPL11/NSUN4/RPS27/GLUL/NVL/PWP1/RRN3/EXOSC6/CEBPZ/AAMP/SDAD1/RPL7L1/NSUN5P2/POP7/EXOSC2	16
BP	GO:0045927	positive regulation of growth	10/494	155/10468	0.196809	0.957229	0.957229	RPS6KA1/RPTOR/SPTBN4/PPM1F/HYAL1/ZNF639/MAPK14/VEGFA/ZFPM2/EXOSC2	10
BP	GO:1901796	regulation of signal transduction by p53 class mediator	10/494	155/10468	0.196809	0.957229	0.957229	RPL11/PLK3/ATM/RRN3/BRD7/ATAD5/TAF15/MAPK14/HIPK2/NBN	10
BP	GO:0034332	adherens junction organization	6/494	83/10468	0.197242	0.957229	0.957229	TESK2/AJUBA/PIP5K1C/PPM1F/CADM2/VEGFA	6
BP	GO:0097696	STAT cascade	6/494	83/10468	0.197242	0.957229	0.957229	PWP1/PKD1/SOCS1/CRLF3/PARP14/HES1	6
BP	GO:0043414	macromolecule methylation	14/494	230/10468	0.198423	0.957229	0.957229	MTHFR/NSUN4/ARID4B/PWP1/SETD1A/NDUFAF7/FBXO11/TRMT10A/MYB/NSUN5P2/METTL2B/MYC/PHF19/NTMT1	14
BP	GO:0042073	intraciliary transport	4/494	49/10468	0.199338	0.957229	0.957229	IFT46/DYNLRB1/TTC26/PCM1	4
BP	GO:1901799	negative regulation of proteasomal protein catabolic process	4/494	49/10468	0.199338	0.957229	0.957229	RPL11/TLK2/PSMF1/CAMLG	4
BP	GO:0000288	nuclear-transcribed mRNA catabolic process, deadenylation-dependent decay	5/494	66/10468	0.200026	0.957229	0.957229	EXOSC6/TNRC6C/ZFP36/ZFP36L2/EXOSC2	5
BP	GO:0050671	positive regulation of lymphocyte proliferation	5/494	66/10468	0.200026	0.957229	0.957229	ATAD5/HES1/AGER/HLA-DPB1/EFNB1	5
BP	GO:1903038	negative regulation of leukocyte cell-cell adhesion	5/494	66/10468	0.200026	0.957229	0.957229	SOCS1/CEBPB/RUNX1/TNFRSF21/GNRH1	5
BP	GO:0043487	regulation of RNA stability	10/494	156/10468	0.202118	0.957229	0.957229	ZC3H14/EXOSC6/PSMD3/ZFP36/ZFP36L2/PSME4/PSMF1/PSMB8/MAPK14/EXOSC2	10
BP	GO:0032615	interleukin-12 production	3/494	33/10468	0.202641	0.957229	0.957229	LTB/AGER/MAPK14	3
BP	GO:0045596	negative regulation of cell differentiation	22/494	385/10468	0.20386	0.957229	0.957229	SORT1/GDF11/MEIS2/SOCS1/TBX6/PTPRS/ZFP36/TRIB2/ZFP36L2/DLX1/RUNX1/HES1/CDKL3/HSPA9/MYLIP/VEGFA/FOXO3/PCM1/GNRH1/ZFPM2/TRIB1/MYC	22
BP	GO:0007411	axon guidance	9/494	138/10468	0.204323	0.957229	0.957229	RAP1GAP/ARTN/UNC5B/ROBO3/SPTBN4/PLXNB1/VEGFA/DOK2/EFNB1	9
BP	GO:0097485	neuron projection guidance	9/494	138/10468	0.204323	0.957229	0.957229	RAP1GAP/ARTN/UNC5B/ROBO3/SPTBN4/PLXNB1/VEGFA/DOK2/EFNB1	9
BP	GO:0030902	hindbrain development	6/494	84/10468	0.204642	0.957229	0.957229	TTBK2/PTPRS/EN1/PSMG1/HES1/SEC24B	6
BP	GO:0009952	anterior/posterior pattern specification	8/494	120/10468	0.205798	0.957229	0.957229	ATM/GDF11/TMED2/TBX6/BPTF/EN1/HES1/HIPK2	8
BP	GO:0000075	cell cycle checkpoint	12/494	194/10468	0.205965	0.957229	0.957229	CLSPN/PLK3/ORC1/DTL/INTS7/ATM/CDT1/CDC6/ARID3A/CLOCK/MAPK14/NBN	12
BP	GO:0042157	lipoprotein metabolic process	7/494	102/10468	0.206135	0.957229	0.957229	PIGC/GLUL/ATM/WIPI1/ZDHHC19/PIGZ/MTTP	7
BP	GO:0043618	regulation of transcription from RNA polymerase II promoter in response to stress	7/494	102/10468	0.206135	0.957229	0.957229	PSMD3/PSME4/PSMF1/CEBPB/PSMB8/VEGFA/CITED2	7
BP	GO:0009100	glycoprotein metabolic process	16/494	270/10468	0.206731	0.957229	0.957229	FBXO2/FBXO44/EXT2/TMEM258/ALG9/ALG10/ST6GALNAC1/UGGT1/HS6ST1/GALNT5/SDF2L1/HYAL1/PXYLP1/EGFLAM/MAN1A1/RNF139	16
BP	GO:0000578	embryonic axis specification	2/494	18/10468	0.207596	0.957229	0.957229	TMED2/TBX6	2
BP	GO:0002715	regulation of natural killer cell mediated immunity	2/494	18/10468	0.207596	0.957229	0.957229	MICB/ULBP2	2
BP	GO:0006488	dolichol-linked oligosaccharide biosynthetic process	2/494	18/10468	0.207596	0.957229	0.957229	ALG9/ALG10	2
BP	GO:0007063	regulation of sister chromatid cohesion	2/494	18/10468	0.207596	0.957229	0.957229	SFPQ/FEN1	2
BP	GO:0007064	mitotic sister chromatid cohesion	2/494	18/10468	0.207596	0.957229	0.957229	PDS5A/BOD1	2
BP	GO:0010464	regulation of mesenchymal cell proliferation	2/494	18/10468	0.207596	0.957229	0.957229	VEGFA/MYC	2
BP	GO:0032528	microvillus organization	2/494	18/10468	0.207596	0.957229	0.957229	RAP1GAP/TNIK	2
BP	GO:0032986	protein-DNA complex disassembly	2/494	18/10468	0.207596	0.957229	0.957229	SMARCC2/MYC	2
BP	GO:0033137	negative regulation of peptidyl-serine phosphorylation	2/494	18/10468	0.207596	0.957229	0.957229	PWP1/PPM1F	2
BP	GO:0040020	regulation of meiotic nuclear division	2/494	18/10468	0.207596	0.957229	0.957229	UBE2B/FBXO43	2
BP	GO:0046639	negative regulation of alpha-beta T cell differentiation	2/494	18/10468	0.207596	0.957229	0.957229	SOCS1/RUNX1	2
BP	GO:0048679	regulation of axon regeneration	2/494	18/10468	0.207596	0.957229	0.957229	PTPRF/PTPRS	2
BP	GO:0090184	positive regulation of kidney development	2/494	18/10468	0.207596	0.957229	0.957229	VEGFA/MYC	2
BP	GO:0090312	positive regulation of protein deacetylation	2/494	18/10468	0.207596	0.957229	0.957229	C6orf89/VEGFA	2
BP	GO:1901890	positive regulation of cell junction assembly	2/494	18/10468	0.207596	0.957229	0.957229	PPM1F/VEGFA	2
BP	GO:1990776	response to angiotensin	2/494	18/10468	0.207596	0.957229	0.957229	AHCYL1/CDC6	2
BP	GO:2000637	positive regulation of gene silencing by miRNA	2/494	18/10468	0.207596	0.957229	0.957229	AJUBA/ZFP36	2
BP	GO:0002526	acute inflammatory response	5/494	67/10468	0.20846	0.957229	0.957229	PTGER3/CR1L/ICAM1/ACVR1/CEBPB	5
BP	GO:0032675	regulation of interleukin-6 production	5/494	67/10468	0.20846	0.957229	0.957229	CEBPB/TBC1D23/AGER/MAPK13/LPL	5
BP	GO:0032946	positive regulation of mononuclear cell proliferation	5/494	67/10468	0.20846	0.957229	0.957229	ATAD5/HES1/AGER/HLA-DPB1/EFNB1	5
BP	GO:1901216	positive regulation of neuron death	5/494	67/10468	0.20846	0.957229	0.957229	MCL1/ATM/FOXO3/MYB/AIMP2	5
BP	GO:0030901	midbrain development	4/494	50/10468	0.209237	0.957229	0.957229	YWHAE/EN1/CCDC14/HES1	4
BP	GO:0060840	artery development	4/494	50/10468	0.209237	0.957229	0.957229	LTBP1/HES1/SEC24B/VEGFA	4
BP	GO:1901880	negative regulation of protein depolymerization	4/494	50/10468	0.209237	0.957229	0.957229	LMOD1/TTBK2/SPTBN4/CAPG	4
BP	GO:0051648	vesicle localization	13/494	214/10468	0.211441	0.957229	0.957229	TMED2/SEC23A/VPS18/SNAP23/AP3S2/GOSR1/WIPI1/AP3D1/PIP5K1C/SEC13/TBC1D23/BLOC1S4/SEC24B	13
BP	GO:0002285	lymphocyte activation involved in immune response	7/494	103/10468	0.212923	0.957229	0.957229	ZNF683/UNG/EXOSC6/ATAD5/ICAM1/MYB/NBN	7
BP	GO:0033865	nucleoside bisphosphate metabolic process	7/494	103/10468	0.212923	0.957229	0.957229	ACOT7/MPC2/ACAT1/HDDC3/ACSM3/SULT1A3/SULT1A4	7
BP	GO:0033875	ribonucleoside bisphosphate metabolic process	7/494	103/10468	0.212923	0.957229	0.957229	ACOT7/MPC2/ACAT1/HDDC3/ACSM3/SULT1A3/SULT1A4	7
BP	GO:0034032	purine nucleoside bisphosphate metabolic process	7/494	103/10468	0.212923	0.957229	0.957229	ACOT7/MPC2/ACAT1/HDDC3/ACSM3/SULT1A3/SULT1A4	7
BP	GO:0050920	regulation of chemotaxis	7/494	103/10468	0.212923	0.957229	0.957229	NBL1/ARTN/PPM1F/FGF18/AGER/MAPK14/VEGFA	7
BP	GO:0050867	positive regulation of cell activation	11/494	177/10468	0.2147	0.957229	0.957229	RPS6KA1/SOCS1/EXOSC6/ATAD5/AP3D1/RUNX1/HES1/AGER/HLA-DPB1/MYB/EFNB1	11
BP	GO:0014909	smooth muscle cell migration	3/494	34/10468	0.215052	0.957229	0.957229	TPM1/AAMP/TRIB1	3
BP	GO:0035904	aorta development	3/494	34/10468	0.215052	0.957229	0.957229	LTBP1/HES1/SEC24B	3
BP	GO:0038202	TORC1 signaling	3/494	34/10468	0.215052	0.957229	0.957229	ATM/RPTOR/SEC13	3
BP	GO:0048844	artery morphogenesis	3/494	34/10468	0.215052	0.957229	0.957229	HES1/SEC24B/VEGFA	3
BP	GO:0051031	tRNA transport	3/494	34/10468	0.215052	0.957229	0.957229	TOMM20/NUP85/SEC13	3
BP	GO:0010970	transport along microtubule	9/494	140/10468	0.215908	0.957229	0.957229	SFPQ/IFT46/AP3S2/SPG7/AP3D1/DYNLRB1/BLOC1S4/TTC26/PCM1	9
BP	GO:0099111	microtubule-based transport	9/494	140/10468	0.215908	0.957229	0.957229	SFPQ/IFT46/AP3S2/SPG7/AP3D1/DYNLRB1/BLOC1S4/TTC26/PCM1	9
BP	GO:2000146	negative regulation of cell motility	9/494	140/10468	0.215908	0.957229	0.957229	NBL1/TPM1/RHOB/FOXO3/CITED2/GNRH1/TRIB1/SCAI/RAP2C	9
BP	GO:0071902	positive regulation of protein serine/threonine kinase activity	13/494	215/10468	0.216112	0.957229	0.957229	CCND2/AJUBA/MAP4K5/PKD1/CDC6/RPTOR/SPDYA/TNIK/FGF18/AGER/MAPK14/CCND3/VEGFA	13
BP	GO:1900034	regulation of cellular response to heat	5/494	68/10468	0.217007	0.957229	0.957229	ATM/YWHAE/NUP85/RPTOR/SEC13	5
BP	GO:0071363	cellular response to growth factor stimulus	23/494	409/10468	0.219098	0.957229	0.957229	NBL1/SORT1/BAMBI/CDKN1C/ARPC3/RNF111/SMURF2/EEF2/DAND5/ZFP36/LTBP1/ZFP36L2/ACVR1/DLX1/HYAL1/HES1/FGF18/MAPK14/FRS3/VEGFA/FOXO3/CITED2/HIPK2	23
BP	GO:0032414	positive regulation of ion transmembrane transporter activity	4/494	51/10468	0.219272	0.957229	0.957229	RNF207/NOS1AP/STIM1/GLRX	4
BP	GO:0045582	positive regulation of T cell differentiation	4/494	51/10468	0.219272	0.957229	0.957229	SOCS1/AP3D1/RUNX1/MYB	4
BP	GO:0048593	camera-type eye morphogenesis	4/494	51/10468	0.219272	0.957229	0.957229	FJX1/GDF11/VEGFA/HIPK2	4
BP	GO:0098930	axonal transport	4/494	51/10468	0.219272	0.957229	0.957229	AP3S2/SPG7/AP3D1/BLOC1S4	4
BP	GO:0019751	polyol metabolic process	6/494	86/10468	0.219733	0.957229	0.957229	ASAH2B/CYP2R1/SPR/PLCL1/COQ2/PCBD2	6
BP	GO:0031146	SCF-dependent proteasomal ubiquitin-dependent protein catabolic process	6/494	86/10468	0.219733	0.957229	0.957229	FBXO2/FBXO44/PSMD3/PSME4/PSMF1/PSMB8	6
BP	GO:0007283	spermatogenesis	17/494	293/10468	0.22211	0.957229	0.957229	TESK2/ARID4B/DUSP13/HERC2/TYRO3/CATSPER2/SNRPA1/SPATA20/PCSK4/ASF1B/PSME4/SPATA2/CLOCK/UBE2B/IMMP2L/TTC26/SPATA31C1	17
BP	GO:0048609	multicellular organismal reproductive process	26/494	469/10468	0.222455	0.957229	0.957229	TESK2/UBE2Q1/ARID4B/DUSP13/ATM/TMED2/HERC2/TYRO3/CATSPER2/SNRPA1/SPATA20/PCSK4/EPOR/ASF1B/SPDYA/PSME4/ACVR1/SPATA2/CLOCK/UBE2B/FOXO3/IMMP2L/TTC26/GNRH1/SPATA31C1/NR6A1	26
BP	GO:0050768	negative regulation of neurogenesis	10/494	160/10468	0.223946	0.957229	0.957229	GDF11/TBX6/PTPRS/DLX1/HES1/CDKL3/MYLIP/FOXO3/PCM1/GNRH1	10
BP	GO:0009408	response to heat	8/494	123/10468	0.22468	0.957229	0.957229	CLPB/ATM/YWHAE/NUP85/RPTOR/SEC13/HSPA9/MICB	8
BP	GO:1903708	positive regulation of hemopoiesis	8/494	123/10468	0.22468	0.957229	0.957229	SOCS1/AP3D1/RUNX1/AGER/MAPK14/FOXO3/MYB/TRIB1	8
BP	GO:0006470	protein dephosphorylation	14/494	236/10468	0.225133	0.957229	0.957229	PTPRF/CTTNBP2NL/ENSA/DUSP23/DUSP13/PTPN21/YWHAE/SSH2/PTPRS/PTPRH/PPM1F/PPA2/BOD1/PPP1R3B	14
BP	GO:0070997	neuron death	14/494	236/10468	0.225133	0.957229	0.957229	MCL1/UNC5B/ATM/TYRO3/SULT1A3/EN1/DLX1/CEBPB/CPEB4/TNFRSF21/FOXO3/MYB/AIMP2/HIPK2	14
BP	GO:0006085	acetyl-CoA biosynthetic process	2/494	19/10468	0.225231	0.957229	0.957229	MPC2/ACAT1	2
BP	GO:0006490	oligosaccharide-lipid intermediate biosynthetic process	2/494	19/10468	0.225231	0.957229	0.957229	ALG9/ALG10	2
BP	GO:0008038	neuron recognition	2/494	19/10468	0.225231	0.957229	0.957229	ROBO3/TNFRSF21	2
BP	GO:0030857	negative regulation of epithelial cell differentiation	2/494	19/10468	0.225231	0.957229	0.957229	HES1/VEGFA	2
BP	GO:0030947	regulation of vascular endothelial growth factor receptor signaling pathway	2/494	19/10468	0.225231	0.957229	0.957229	FGF18/VEGFA	2
BP	GO:0035909	aorta morphogenesis	2/494	19/10468	0.225231	0.957229	0.957229	HES1/SEC24B	2
BP	GO:0060042	retina morphogenesis in camera-type eye	2/494	19/10468	0.225231	0.957229	0.957229	FJX1/HIPK2	2
BP	GO:0060148	positive regulation of posttranscriptional gene silencing	2/494	19/10468	0.225231	0.957229	0.957229	AJUBA/ZFP36	2
BP	GO:0071459	protein localization to chromosome, centromeric region	2/494	19/10468	0.225231	0.957229	0.957229	CDT1/BOD1	2
BP	GO:0071514	genetic imprinting	2/494	19/10468	0.225231	0.957229	0.957229	ARID4B/CDKN1C	2
BP	GO:0071542	dopaminergic neuron differentiation	2/494	19/10468	0.225231	0.957229	0.957229	EN1/VEGFA	2
BP	GO:0086004	regulation of cardiac muscle cell contraction	2/494	19/10468	0.225231	0.957229	0.957229	RNF207/NOS1AP	2
BP	GO:1900745	positive regulation of p38MAPK cascade	2/494	19/10468	0.225231	0.957229	0.957229	AGER/VEGFA	2
BP	GO:1901381	positive regulation of potassium ion transmembrane transport	2/494	19/10468	0.225231	0.957229	0.957229	RNF207/NOS1AP	2
BP	GO:1901798	positive regulation of signal transduction by p53 class mediator	2/494	19/10468	0.225231	0.957229	0.957229	RPL11/ATM	2
BP	GO:0046425	regulation of JAK-STAT cascade	5/494	69/10468	0.225662	0.957229	0.957229	PWP1/SOCS1/CRLF3/PARP14/HES1	5
BP	GO:0070665	positive regulation of leukocyte proliferation	5/494	69/10468	0.225662	0.957229	0.957229	ATAD5/HES1/AGER/HLA-DPB1/EFNB1	5
BP	GO:0006323	DNA packaging	7/494	105/10468	0.226739	0.957229	0.957229	SART3/OIP5/NUSAP1/ASF1B/PSME4/SHPRH/GATAD1	7
BP	GO:0042445	hormone metabolic process	7/494	105/10468	0.226739	0.957229	0.957229	DHRS3/HSD17B7/CYP17A1/CYP2R1/PCSK4/CYP2S1/TIPARP	7
BP	GO:0007224	smoothened signaling pathway	6/494	87/10468	0.227415	0.957229	0.957229	GPR161/IFT46/TTBK2/HES1/TTC26/HIPK2	6
BP	GO:0030260	entry into host cell	6/494	87/10468	0.227415	0.957229	0.957229	VPS18/TYRO3/ICAM1/HYAL1/ZNF639/GYPA	6
BP	GO:0044409	entry into host	6/494	87/10468	0.227415	0.957229	0.957229	VPS18/TYRO3/ICAM1/HYAL1/ZNF639/GYPA	6
BP	GO:0051806	entry into cell of other organism involved in symbiotic interaction	6/494	87/10468	0.227415	0.957229	0.957229	VPS18/TYRO3/ICAM1/HYAL1/ZNF639/GYPA	6
BP	GO:0051828	entry into other organism involved in symbiotic interaction	6/494	87/10468	0.227415	0.957229	0.957229	VPS18/TYRO3/ICAM1/HYAL1/ZNF639/GYPA	6
BP	GO:0001707	mesoderm formation	3/494	35/10468	0.227618	0.957229	0.957229	EXT2/TBX6/ACVR1	3
BP	GO:0018198	peptidyl-cysteine modification	3/494	35/10468	0.227618	0.957229	0.957229	NOS1AP/CHCHD4/ZDHHC19	3
BP	GO:0030888	regulation of B cell proliferation	3/494	35/10468	0.227618	0.957229	0.957229	ATM/ATAD5/TNFRSF21	3
BP	GO:0043628	ncRNA 3'-end processing	3/494	35/10468	0.227618	0.957229	0.957229	INTS7/EXOSC6/EXOSC2	3
BP	GO:0045604	regulation of epidermal cell differentiation	3/494	35/10468	0.227618	0.957229	0.957229	ZFP36/RUNX1/HES1	3
BP	GO:0048857	neural nucleus development	3/494	35/10468	0.227618	0.957229	0.957229	YWHAE/CCDC14/SEC24B	3
BP	GO:0032504	multicellular organism reproduction	26/494	471/10468	0.22894	0.957229	0.957229	TESK2/UBE2Q1/ARID4B/DUSP13/ATM/TMED2/HERC2/TYRO3/CATSPER2/SNRPA1/SPATA20/PCSK4/EPOR/ASF1B/SPDYA/PSME4/ACVR1/SPATA2/CLOCK/UBE2B/FOXO3/IMMP2L/TTC26/GNRH1/SPATA31C1/NR6A1	26
BP	GO:0000381	regulation of alternative mRNA splicing, via spliceosome	4/494	52/10468	0.229433	0.957229	0.957229	RBM4B/ZC3H10/SART3/NSRP1	4
BP	GO:0007276	gamete generation	22/494	393/10468	0.231782	0.957229	0.957229	TESK2/ARID4B/DUSP13/ATM/HERC2/TYRO3/CATSPER2/SNRPA1/SPATA20/PCSK4/ASF1B/SPDYA/PSME4/ACVR1/SPATA2/CLOCK/UBE2B/FOXO3/IMMP2L/TTC26/SPATA31C1/NR6A1	22
BP	GO:0010498	proteasomal protein catabolic process	23/494	413/10468	0.232967	0.957229	0.957229	FBXO2/FBXO44/RPL11/PLK3/HECTD3/HERC2/PKD1/PSMD3/TLK2/SMURF2/TRIB2/PSME4/UGGT1/PSMF1/SDF2L1/CLOCK/UBE2B/CAMLG/PSMB8/RNF216/RNF139/TRIB1/UBE2R2	23
BP	GO:0031503	protein-containing complex localization	14/494	238/10468	0.23436	0.957229	0.957229	SRRM1/SFPQ/ATM/IFT46/GPC6/SMG1/NUP85/AP3D1/DYNLRB1/POLDIP3/SEC13/SDAD1/TTC26/PCM1	14
BP	GO:0001906	cell killing	5/494	70/10468	0.234418	0.957229	0.957229	CR1L/ICAM1/AGER/MICB/ULBP2	5
BP	GO:1904892	regulation of STAT cascade	5/494	70/10468	0.234418	0.957229	0.957229	PWP1/SOCS1/CRLF3/PARP14/HES1	5
BP	GO:0071346	cellular response to interferon-gamma	6/494	88/10468	0.235182	0.957229	0.957229	CD58/SOCS1/ICAM1/CDC37/PARP14/HLA-DPB1	6
BP	GO:0097193	intrinsic apoptotic signaling pathway	13/494	219/10468	0.23523	0.957229	0.957229	RPL11/IFI6/SFPQ/MCL1/IVNS1ABP/ATM/RRN3/ATAD5/CEBPB/PPM1F/HINT1/HIPK2/NBN	13
BP	GO:2000145	regulation of cell motility	27/494	493/10468	0.236082	0.957229	0.957229	NBL1/GLUL/ATM/AJUBA/TTBK2/TPM1/SMURF2/ICAM1/RHOB/ACVR1/AAMP/PPM1F/CAPN7/ELP6/PLXNB1/HYAL1/IGSF10/FGF18/AGER/MAPK14/VEGFA/FOXO3/CITED2/GNRH1/TRIB1/SCAI/RAP2C	27
BP	GO:2000058	regulation of ubiquitin-dependent protein catabolic process	8/494	125/10468	0.237608	0.957229	0.957229	RPL11/PLK3/TLK2/TRIB2/CAMLG/HIPK2/RNF139/TRIB1	8
BP	GO:0010817	regulation of hormone levels	15/494	258/10468	0.237692	0.957229	0.957229	DHRS3/ENSA/UBE2Q1/HSD17B7/MPC2/GLUL/CYP17A1/CYP2R1/SNAP23/MIDN/PCSK4/CYP2S1/TIPARP/CLOCK/MYB	15
BP	GO:0042176	regulation of protein catabolic process	17/494	297/10468	0.238647	0.957229	0.957229	RPL11/PLK3/DTL/PKD1/PSMD3/TLK2/SMURF2/ODC1/TRIB2/PSMF1/TIPARP/CAMLG/MYLIP/CYP51A1/HIPK2/RNF139/TRIB1	17
BP	GO:0001909	leukocyte mediated cytotoxicity	4/494	53/10468	0.239708	0.957229	0.957229	ICAM1/AGER/MICB/ULBP2	4
BP	GO:0030512	negative regulation of transforming growth factor beta receptor signaling pathway	4/494	53/10468	0.239708	0.957229	0.957229	BAMBI/SMURF2/DAND5/LTBP1	4
BP	GO:0042255	ribosome assembly	4/494	53/10468	0.239708	0.957229	0.957229	MRTO4/RPL11/NSUN4/RPS27	4
BP	GO:0001947	heart looping	3/494	36/10468	0.240318	0.957229	0.957229	RNF207/TMED2/TBX6	3
BP	GO:0006809	nitric oxide biosynthetic process	3/494	36/10468	0.240318	0.957229	0.957229	NOS1AP/ICAM1/SPR	3
BP	GO:0030166	proteoglycan biosynthetic process	3/494	36/10468	0.240318	0.957229	0.957229	EXT2/HS6ST1/PXYLP1	3
BP	GO:1903779	regulation of cardiac conduction	3/494	36/10468	0.240318	0.957229	0.957229	RNF207/AHCYL1/STIM1	3
BP	GO:0016571	histone methylation	7/494	107/10468	0.240854	0.957229	0.957229	MTHFR/ARID4B/PWP1/SETD1A/MYB/PHF19/NTMT1	7
BP	GO:0010721	negative regulation of cell development	11/494	182/10468	0.241172	0.957229	0.957229	GDF11/TBX6/PTPRS/DLX1/HES1/CDKL3/MYLIP/VEGFA/FOXO3/PCM1/GNRH1	11
BP	GO:0033673	negative regulation of kinase activity	11/494	182/10468	0.241172	0.957229	0.957229	CDKN1C/AJUBA/SOCS1/RPTOR/MIDN/TRIB2/PPM1F/PRKAR2A/PRKRIP1/TRIB1/GNAQ	11
BP	GO:0051403	stress-activated MAPK cascade	11/494	182/10468	0.241172	0.957229	0.957229	MAP4K5/ZFP36/TNIK/AGER/MAPK14/MAPK13/VEGFA/KLHDC10/HIPK2/TRIB1/MYC	11
BP	GO:0000729	DNA double-strand break processing	2/494	20/10468	0.24297	0.957229	0.957229	ATM/NBN	2
BP	GO:0008299	isoprenoid biosynthetic process	2/494	20/10468	0.24297	0.957229	0.957229	GGPS1/COQ2	2
BP	GO:0010499	proteasomal ubiquitin-independent protein catabolic process	2/494	20/10468	0.24297	0.957229	0.957229	PSME4/PSMB8	2
BP	GO:0019369	arachidonic acid metabolic process	2/494	20/10468	0.24297	0.957229	0.957229	CYP2S1/TBXAS1	2
BP	GO:0035315	hair cell differentiation	2/494	20/10468	0.24297	0.957229	0.957229	HES1/SEC24B	2
BP	GO:0042036	negative regulation of cytokine biosynthetic process	2/494	20/10468	0.24297	0.957229	0.957229	ZFP36/TRIB2	2
BP	GO:0045066	regulatory T cell differentiation	2/494	20/10468	0.24297	0.957229	0.957229	SOCS1/RUNX1	2
BP	GO:0045589	regulation of regulatory T cell differentiation	2/494	20/10468	0.24297	0.957229	0.957229	SOCS1/RUNX1	2
BP	GO:0046827	positive regulation of protein export from nucleus	2/494	20/10468	0.24297	0.957229	0.957229	YWHAE/RBM22	2
BP	GO:0050869	negative regulation of B cell activation	2/494	20/10468	0.24297	0.957229	0.957229	ATM/TNFRSF21	2
BP	GO:0060428	lung epithelium development	2/494	20/10468	0.24297	0.957229	0.957229	PKD1/AIMP2	2
BP	GO:0070570	regulation of neuron projection regeneration	2/494	20/10468	0.24297	0.957229	0.957229	PTPRF/PTPRS	2
BP	GO:0071312	cellular response to alkaloid	2/494	20/10468	0.24297	0.957229	0.957229	RAD51/ICAM1	2
BP	GO:1904037	positive regulation of epithelial cell apoptotic process	2/494	20/10468	0.24297	0.957229	0.957229	SORT1/FOXO3	2
BP	GO:0097327	response to antineoplastic agent	5/494	71/10468	0.243267	0.957229	0.957229	RAD51/KAT7/ICAM1/MAPK13/FOXO3	5
BP	GO:1902105	regulation of leukocyte differentiation	10/494	164/10468	0.246647	0.957229	0.957229	ZNF683/SOCS1/AP3D1/ZFP36L2/CEBPB/RUNX1/AGER/MYB/TRIB1/MYC	10
BP	GO:0050663	cytokine secretion	7/494	108/10468	0.248015	0.957229	0.957229	CD58/SOCS1/SERPINB1/AGER/MAPK14/TNFRSF21/LPL	7
BP	GO:0030099	myeloid cell differentiation	16/494	280/10468	0.249274	0.957229	0.957229	AGO1/LBR/CDKN1C/MEIS2/SETD1A/TNRC6C/ZFP36/CEBPB/RUNX1/HSPA9/MAPK14/VEGFA/FOXO3/HIPK2/TRIB1/MYC	16
BP	GO:0050715	positive regulation of cytokine secretion	4/494	54/10468	0.250088	0.957229	0.957229	CD58/AGER/MAPK14/LPL	4
BP	GO:0045665	negative regulation of neuron differentiation	8/494	127/10468	0.250784	0.957229	0.957229	GDF11/TBX6/PTPRS/DLX1/HES1/CDKL3/MYLIP/FOXO3	8
BP	GO:0051099	positive regulation of binding	8/494	127/10468	0.250784	0.957229	0.957229	RPL11/NVL/BAMBI/PKD1/CDT1/PLCL1/HES1/HIPK2	8
BP	GO:0030330	DNA damage response, signal transduction by p53 class mediator	6/494	90/10468	0.250955	0.957229	0.957229	PLK3/ATM/ARID3A/FOXO3/HIPK2/NBN	6
BP	GO:0034728	nucleosome organization	6/494	90/10468	0.250955	0.957229	0.957229	SMARCC2/SART3/OIP5/ASF1B/PSME4/SHPRH	6
BP	GO:0051983	regulation of chromosome segregation	6/494	90/10468	0.250955	0.957229	0.957229	SFPQ/MKI67/FEN1/ATM/CDT1/CDC6	6
BP	GO:0060562	epithelial tube morphogenesis	11/494	184/10468	0.25209	0.957229	0.957229	RNF207/MTHFR/TMED2/PKD1/TBX6/RHOB/ACVR1/HES1/SEC24B/VEGFA/MYC	11
BP	GO:0033045	regulation of sister chromatid segregation	5/494	72/10468	0.252204	0.957229	0.957229	SFPQ/FEN1/ATM/CDT1/CDC6	5
BP	GO:1903363	negative regulation of cellular protein catabolic process	5/494	72/10468	0.252204	0.957229	0.957229	RPL11/TLK2/PSMF1/CAMLG/HIPK2	5
BP	GO:0007189	adenylate cyclase-activating G protein-coupled receptor signaling pathway	3/494	37/10468	0.253132	0.957229	0.957229	PTGER3/GPR161/GNAQ	3
BP	GO:0009066	aspartate family amino acid metabolic process	3/494	37/10468	0.253132	0.957229	0.957229	MTHFR/AHCYL1/AHCYL2	3
BP	GO:0048332	mesoderm morphogenesis	3/494	37/10468	0.253132	0.957229	0.957229	EXT2/TBX6/ACVR1	3
BP	GO:0051187	cofactor catabolic process	3/494	37/10468	0.253132	0.957229	0.957229	ACOT7/ACAT1/BLVRB	3
BP	GO:0034249	negative regulation of cellular amide metabolic process	8/494	128/10468	0.257458	0.957229	0.957229	AGO1/SRP9/EIF4EBP2/TNRC6C/ZFP36/ZFP36L2/CPEB4/RNF139	8
BP	GO:0008652	cellular amino acid biosynthetic process	4/494	55/10468	0.260561	0.957229	0.957229	MTHFR/GLUL/PYCR2/GAD1	4
BP	GO:0043242	negative regulation of protein complex disassembly	4/494	55/10468	0.260561	0.957229	0.957229	LMOD1/TTBK2/SPTBN4/CAPG	4
BP	GO:2000379	positive regulation of reactive oxygen species metabolic process	4/494	55/10468	0.260561	0.957229	0.957229	NOS1AP/ICAM1/MAPK14/FOXO3	4
BP	GO:0001774	microglial cell activation	2/494	21/10468	0.260763	0.957229	0.957229	ATM/AGER	2
BP	GO:0001893	maternal placenta development	2/494	21/10468	0.260763	0.957229	0.957229	TMED2/EPOR	2
BP	GO:0002269	leukocyte activation involved in inflammatory response	2/494	21/10468	0.260763	0.957229	0.957229	ATM/AGER	2
BP	GO:0006536	glutamate metabolic process	2/494	21/10468	0.260763	0.957229	0.957229	GLUL/GAD1	2
BP	GO:0006692	prostanoid metabolic process	2/494	21/10468	0.260763	0.957229	0.957229	CYP2S1/TBXAS1	2
BP	GO:0006693	prostaglandin metabolic process	2/494	21/10468	0.260763	0.957229	0.957229	CYP2S1/TBXAS1	2
BP	GO:0007602	phototransduction	2/494	21/10468	0.260763	0.957229	0.957229	RRH/GNAQ	2
BP	GO:0010463	mesenchymal cell proliferation	2/494	21/10468	0.260763	0.957229	0.957229	VEGFA/MYC	2
BP	GO:0030204	chondroitin sulfate metabolic process	2/494	21/10468	0.260763	0.957229	0.957229	HYAL1/EGFLAM	2
BP	GO:0031279	regulation of cyclase activity	2/494	21/10468	0.260763	0.957229	0.957229	STIM1/MAPK14	2
BP	GO:0032438	melanosome organization	2/494	21/10468	0.260763	0.957229	0.957229	AP3D1/BLOC1S4	2
BP	GO:0035066	positive regulation of histone acetylation	2/494	21/10468	0.260763	0.957229	0.957229	BRD7/KAT7	2
BP	GO:0045429	positive regulation of nitric oxide biosynthetic process	2/494	21/10468	0.260763	0.957229	0.957229	NOS1AP/ICAM1	2
BP	GO:0045933	positive regulation of muscle contraction	2/494	21/10468	0.260763	0.957229	0.957229	RNF207/NOS1AP	2
BP	GO:0048662	negative regulation of smooth muscle cell proliferation	2/494	21/10468	0.260763	0.957229	0.957229	TPM1/TRIB1	2
BP	GO:0048753	pigment granule organization	2/494	21/10468	0.260763	0.957229	0.957229	AP3D1/BLOC1S4	2
BP	GO:0055023	positive regulation of cardiac muscle tissue growth	2/494	21/10468	0.260763	0.957229	0.957229	MAPK14/ZFPM2	2
BP	GO:0086002	cardiac muscle cell action potential involved in contraction	2/494	21/10468	0.260763	0.957229	0.957229	RNF207/NOS1AP	2
BP	GO:1903393	positive regulation of adherens junction organization	2/494	21/10468	0.260763	0.957229	0.957229	PPM1F/VEGFA	2
BP	GO:1905517	macrophage migration	2/494	21/10468	0.260763	0.957229	0.957229	NUP85/MAPK14	2
BP	GO:2001222	regulation of neuron migration	2/494	21/10468	0.260763	0.957229	0.957229	IGSF10/GNRH1	2
BP	GO:0042737	drug catabolic process	5/494	73/10468	0.261221	0.957229	0.957229	NPL/CYP2R1/ACAT1/SULT1A3/CYP2S1	5
BP	GO:0015931	nucleobase-containing compound transport	12/494	205/10468	0.261754	0.957229	0.957229	SRRM1/SFPQ/TOMM20/NPIPA1/SMG1/NUP85/EPG5/ZFP36/POLDIP3/SEC13/SDAD1/XPO7	12
BP	GO:0008016	regulation of heart contraction	7/494	110/10468	0.262529	0.957229	0.957229	RNF207/AHCYL1/NOS1AP/STIM1/TPM1/YWHAE/SPTBN4	7
BP	GO:0045860	positive regulation of protein kinase activity	19/494	342/10468	0.262731	0.957229	0.957229	CLSPN/MARK2/CCND2/AJUBA/MAP4K5/PKD1/SOCS1/GPRC5B/CDC6/RPTOR/PAK4/SPDYA/PRKAR2A/TNIK/FGF18/AGER/MAPK14/CCND3/VEGFA	19
BP	GO:0008202	steroid metabolic process	11/494	186/10468	0.263178	0.957229	0.957229	HSD17B7/LBR/GGPS1/CYP17A1/CYP2R1/ACAT1/SULT1A3/SULT1A4/SCAP/TIPARP/CYP51A1	11
BP	GO:0051656	establishment of organelle localization	21/494	382/10468	0.26449	0.957229	0.957229	ATM/TMED2/SEC23A/VPS18/NUSAP1/SNAP23/AP3S2/CDT1/LLGL1/GOSR1/WIPI1/AP3D1/PIP5K1C/SEC13/TBC1D23/BLOC1S4/SDAD1/SEC24B/UBE2B/BOD1/PCM1	21
BP	GO:0051783	regulation of nuclear division	9/494	148/10468	0.264604	0.957229	0.957229	MKI67/CDKN1C/ATM/NUSAP1/CDT1/CDC6/STAG1/UBE2B/FBXO43	9
BP	GO:0000387	spliceosomal snRNP assembly	3/494	38/10468	0.26604	0.957229	0.957229	SART3/SNRPG/GEMIN8	3
BP	GO:0030317	flagellated sperm motility	3/494	38/10468	0.26604	0.957229	0.957229	TEKT2/CATSPER2/UBE2B	3
BP	GO:0030834	regulation of actin filament depolymerization	3/494	38/10468	0.26604	0.957229	0.957229	LMOD1/SPTBN4/CAPG	3
BP	GO:0034381	plasma lipoprotein particle clearance	3/494	38/10468	0.26604	0.957229	0.957229	AP2S1/LRPAP1/MYLIP	3
BP	GO:0042698	ovulation cycle	3/494	38/10468	0.26604	0.957229	0.957229	TYRO3/FOXO3/GNRH1	3
BP	GO:0045540	regulation of cholesterol biosynthetic process	3/494	38/10468	0.26604	0.957229	0.957229	GGPS1/SCAP/CYP51A1	3
BP	GO:0047496	vesicle transport along microtubule	3/494	38/10468	0.26604	0.957229	0.957229	AP3S2/AP3D1/BLOC1S4	3
BP	GO:0097722	sperm motility	3/494	38/10468	0.26604	0.957229	0.957229	TEKT2/CATSPER2/UBE2B	3
BP	GO:0106118	regulation of sterol biosynthetic process	3/494	38/10468	0.26604	0.957229	0.957229	GGPS1/SCAP/CYP51A1	3
BP	GO:0006614	SRP-dependent cotranslational protein targeting to membrane	6/494	92/10468	0.267014	0.957229	0.957229	RPL22/RPL11/RPS27/SRP9/RPL41/SRP14	6
BP	GO:0048489	synaptic vesicle transport	6/494	92/10468	0.267014	0.957229	0.957229	VPS18/SNAP23/AP3S2/AP3D1/PIP5K1C/BLOC1S4	6
BP	GO:0097480	establishment of synaptic vesicle localization	6/494	92/10468	0.267014	0.957229	0.957229	VPS18/SNAP23/AP3S2/AP3D1/PIP5K1C/BLOC1S4	6
BP	GO:0022613	ribonucleoprotein complex biogenesis	23/494	423/10468	0.269253	0.957229	0.957229	MRTO4/RPL11/AGO1/NSUN4/RPS27/GLUL/EIF2D/NVL/ATM/PWP1/SART3/RRN3/EXOSC6/CEBPZ/SNRPG/USP39/AAMP/SDAD1/RPL7L1/NSUN5P2/POP7/EXOSC2/GEMIN8	23
BP	GO:0035239	tube morphogenesis	25/494	463/10468	0.26958	0.957229	0.957229	RNF207/MTHFR/AGO1/GLUL/UNC5B/STIM1/TMED2/PKD1/TBX6/PAK4/RHOB/HS6ST1/ACVR1/AAMP/RUNX1/HYAL1/TIPARP/HES1/SEC24B/FGF18/MAPK14/VEGFA/HIPK2/ZFPM2/MYC	25
BP	GO:0000209	protein polyubiquitination	15/494	265/10468	0.269984	0.957229	0.957229	FBXO2/FBXO44/DTL/RNF111/PSMD3/SMURF2/FBXO11/PSME4/PSMF1/UBE2B/PSMB8/MYLIP/SHPRH/RNF216/UBE2R2	15
BP	GO:1901617	organic hydroxy compound biosynthetic process	10/494	168/10468	0.270118	0.957229	0.957229	HSD17B7/LBR/GGPS1/ASAH2B/CYP2R1/SPR/PLCL1/SCAP/PCBD2/CYP51A1	10
BP	GO:0072331	signal transduction by p53 class mediator	13/494	226/10468	0.270197	0.957229	0.957229	RPL11/PLK3/ATM/RRN3/BRD7/ATAD5/TAF15/ARID3A/HINT1/MAPK14/FOXO3/HIPK2/NBN	13
BP	GO:0002495	antigen processing and presentation of peptide antigen via MHC class II	5/494	74/10468	0.270312	0.957229	0.957229	SEC23A/AP2S1/SEC13/SEC24B/HLA-DPB1	5
BP	GO:0006497	protein lipidation	5/494	74/10468	0.270312	0.957229	0.957229	PIGC/GLUL/WIPI1/ZDHHC19/PIGZ	5
BP	GO:0007286	spermatid development	5/494	74/10468	0.270312	0.957229	0.957229	CATSPER2/PCSK4/PSME4/UBE2B/TTC26	5
BP	GO:0019886	antigen processing and presentation of exogenous peptide antigen via MHC class II	5/494	74/10468	0.270312	0.957229	0.957229	SEC23A/AP2S1/SEC13/SEC24B/HLA-DPB1	5
BP	GO:0031497	chromatin assembly	5/494	74/10468	0.270312	0.957229	0.957229	SART3/OIP5/ASF1B/SHPRH/GATAD1	5
BP	GO:0032635	interleukin-6 production	5/494	74/10468	0.270312	0.957229	0.957229	CEBPB/TBC1D23/AGER/MAPK13/LPL	5
BP	GO:0050864	regulation of B cell activation	5/494	74/10468	0.270312	0.957229	0.957229	ATM/EXOSC6/ATAD5/ZFP36L2/TNFRSF21	5
BP	GO:0007162	negative regulation of cell adhesion	9/494	149/10468	0.270924	0.957229	0.957229	SOCS1/CEBPB/RUNX1/PPM1F/PLXNB1/VEGFA/TNFRSF21/CD164/GNRH1	9
BP	GO:0010632	regulation of epithelial cell migration	8/494	130/10468	0.270967	0.957229	0.957229	GLUL/RHOB/AAMP/PPM1F/CAPN7/HYAL1/FGF18/VEGFA	8
BP	GO:0031123	RNA 3'-end processing	8/494	130/10468	0.270967	0.957229	0.957229	SRRM1/AHCYL1/INTS7/ZC3H14/EXOSC6/SUPT5H/POLDIP3/EXOSC2	8
BP	GO:0007045	cell-substrate adherens junction assembly	4/494	56/10468	0.271118	0.957229	0.957229	TESK2/AJUBA/PPM1F/VEGFA	4
BP	GO:0046834	lipid phosphorylation	4/494	56/10468	0.271118	0.957229	0.957229	PI4KB/SOCS1/SMG1/PIP5K1C	4
BP	GO:0048041	focal adhesion assembly	4/494	56/10468	0.271118	0.957229	0.957229	TESK2/AJUBA/PPM1F/VEGFA	4
BP	GO:1902106	negative regulation of leukocyte differentiation	4/494	56/10468	0.271118	0.957229	0.957229	SOCS1/RUNX1/TRIB1/MYC	4
BP	GO:1903409	reactive oxygen species biosynthetic process	4/494	56/10468	0.271118	0.957229	0.957229	NOS1AP/ICAM1/SPR/FOXO3	4
BP	GO:0001889	liver development	6/494	93/10468	0.275139	0.957229	0.957229	RPS6KA1/ACAT1/PKD1/CEBPB/HES1/CITED2	6
BP	GO:0032874	positive regulation of stress-activated MAPK cascade	6/494	93/10468	0.275139	0.957229	0.957229	MAP4K5/TNIK/AGER/VEGFA/KLHDC10/HIPK2	6
BP	GO:0001655	urogenital system development	10/494	169/10468	0.276093	0.957229	0.957229	CDKN1C/ACAT1/GDF11/PKD1/NUP85/ODC1/TIPARP/HES1/VEGFA/MYC	10
BP	GO:0007030	Golgi organization	7/494	112/10468	0.277275	0.957229	0.957229	PLK3/PDE4DIP/ARL1/TMED2/COG1/TMED7/TMED4	7
BP	GO:0021915	neural tube development	7/494	112/10468	0.277275	0.957229	0.957229	MTHFR/GPR161/TMED2/PKD1/EN1/HES1/SEC24B	7
BP	GO:0035195	gene silencing by miRNA	7/494	112/10468	0.277275	0.957229	0.957229	AGO1/ZC3H10/AJUBA/NUP85/TNRC6C/ZFP36/SEC13	7
BP	GO:0006520	cellular amino acid metabolic process	14/494	247/10468	0.277647	0.957229	0.957229	MTHFR/AHCYL1/GLUL/PYCR2/ACAT1/PSMD3/ODC1/PSME4/GAD1/PSMF1/PPA2/PSMB8/AIMP2/AHCYL2	14
BP	GO:0030041	actin filament polymerization	8/494	131/10468	0.277797	0.957229	0.957229	LMOD1/ARPC3/COTL1/PSTPIP2/ICAM1/PLEKHG2/SPTBN4/CAPG	8
BP	GO:0050673	epithelial cell proliferation	12/494	208/10468	0.27782	0.957229	0.957229	RPS6KA1/GLUL/CDKN1C/RPTOR/ZFP36/CEBPB/HYAL1/HES1/SERPINB1/C6orf89/VEGFA/MYC	12
BP	GO:0001569	branching involved in blood vessel morphogenesis	2/494	22/10468	0.278566	0.957229	0.957229	ACVR1/VEGFA	2
BP	GO:0008334	histone mRNA metabolic process	2/494	22/10468	0.278566	0.957229	0.957229	ATM/SNRPG	2
BP	GO:0009648	photoperiodism	2/494	22/10468	0.278566	0.957229	0.957229	RBM4B/CLOCK	2
BP	GO:0021879	forebrain neuron differentiation	2/494	22/10468	0.278566	0.957229	0.957229	DLX1/HES1	2
BP	GO:0031063	regulation of histone deacetylation	2/494	22/10468	0.278566	0.957229	0.957229	C6orf89/VEGFA	2
BP	GO:0031167	rRNA methylation	2/494	22/10468	0.278566	0.957229	0.957229	NSUN4/NSUN5P2	2
BP	GO:0032722	positive regulation of chemokine production	2/494	22/10468	0.278566	0.957229	0.957229	AGER/LPL	2
BP	GO:0043268	positive regulation of potassium ion transport	2/494	22/10468	0.278566	0.957229	0.957229	RNF207/NOS1AP	2
BP	GO:0043372	positive regulation of CD4-positive, alpha-beta T cell differentiation	2/494	22/10468	0.278566	0.957229	0.957229	SOCS1/MYB	2
BP	GO:0048806	genitalia development	2/494	22/10468	0.278566	0.957229	0.957229	TYRO3/PKD1	2
BP	GO:0051339	regulation of lyase activity	2/494	22/10468	0.278566	0.957229	0.957229	STIM1/ISCU	2
BP	GO:0060119	inner ear receptor cell development	2/494	22/10468	0.278566	0.957229	0.957229	HES1/SEC24B	2
BP	GO:0060251	regulation of glial cell proliferation	2/494	22/10468	0.278566	0.957229	0.957229	HES1/MYB	2
BP	GO:0070169	positive regulation of biomineral tissue development	2/494	22/10468	0.278566	0.957229	0.957229	ACVR1/CEBPB	2
BP	GO:0071218	cellular response to misfolded protein	2/494	22/10468	0.278566	0.957229	0.957229	UGGT1/SDF2L1	2
BP	GO:0090183	regulation of kidney development	2/494	22/10468	0.278566	0.957229	0.957229	VEGFA/MYC	2
BP	GO:0097028	dendritic cell differentiation	2/494	22/10468	0.278566	0.957229	0.957229	CEBPB/AGER	2
BP	GO:1901797	negative regulation of signal transduction by p53 class mediator	2/494	22/10468	0.278566	0.957229	0.957229	RRN3/ATAD5	2
BP	GO:1902175	regulation of oxidative stress-induced intrinsic apoptotic signaling pathway	2/494	22/10468	0.278566	0.957229	0.957229	SFPQ/MCL1	2
BP	GO:1903115	regulation of actin filament-based movement	2/494	22/10468	0.278566	0.957229	0.957229	RNF207/NOS1AP	2
BP	GO:1904036	negative regulation of epithelial cell apoptotic process	2/494	22/10468	0.278566	0.957229	0.957229	ICAM1/PAK4	2
BP	GO:1904407	positive regulation of nitric oxide metabolic process	2/494	22/10468	0.278566	0.957229	0.957229	NOS1AP/ICAM1	2
BP	GO:2000758	positive regulation of peptidyl-lysine acetylation	2/494	22/10468	0.278566	0.957229	0.957229	BRD7/KAT7	2
BP	GO:0030837	negative regulation of actin filament polymerization	3/494	39/10468	0.279025	0.957229	0.957229	LMOD1/SPTBN4/CAPG	3
BP	GO:0045685	regulation of glial cell differentiation	3/494	39/10468	0.279025	0.957229	0.957229	DLX1/HES1/TNFRSF21	3
BP	GO:0046209	nitric oxide metabolic process	3/494	39/10468	0.279025	0.957229	0.957229	NOS1AP/ICAM1/SPR	3
BP	GO:1901379	regulation of potassium ion transmembrane transport	3/494	39/10468	0.279025	0.957229	0.957229	RNF207/NOS1AP/YWHAE	3
BP	GO:0001824	blastocyst development	5/494	75/10468	0.279471	0.957229	0.957229	ASF1B/SF3B6/TAF8/RPL7L1/NBN	5
BP	GO:0002504	antigen processing and presentation of peptide or polysaccharide antigen via MHC class II	5/494	75/10468	0.279471	0.957229	0.957229	SEC23A/AP2S1/SEC13/SEC24B/HLA-DPB1	5
BP	GO:0001508	action potential	4/494	57/10468	0.281746	0.957229	0.957229	RNF207/NOS1AP/YWHAE/GNAQ	4
BP	GO:0002065	columnar/cuboidal epithelial cell differentiation	4/494	57/10468	0.281746	0.957229	0.957229	CEBPB/HES1/CLOCK/SEC24B	4
BP	GO:0002521	leukocyte differentiation	17/494	307/10468	0.28206	0.957229	0.957229	RPL22/ZNF683/LBR/IRF2BP2/ATM/TYRO3/SOCS1/AP3D1/ZFP36L2/CEBPB/RUNX1/AGER/MAPK14/VEGFA/MYB/TRIB1/MYC	17
BP	GO:0002696	positive regulation of leukocyte activation	10/494	170/10468	0.282108	0.957229	0.957229	SOCS1/EXOSC6/ATAD5/AP3D1/RUNX1/HES1/AGER/HLA-DPB1/MYB/EFNB1	10
BP	GO:1901342	regulation of vasculature development	10/494	170/10468	0.282108	0.957229	0.957229	AGO1/GLUL/STIM1/PAK4/RHOB/RUNX1/HYAL1/FGF18/VEGFA/HIPK2	10
BP	GO:0070304	positive regulation of stress-activated protein kinase signaling cascade	6/494	94/10468	0.283322	0.957229	0.957229	MAP4K5/TNIK/AGER/VEGFA/KLHDC10/HIPK2	6
BP	GO:0006417	regulation of translation	16/494	288/10468	0.285566	0.957229	0.957229	RPL22/RPS6KA1/AGO1/NSUN4/SRP9/EIF4EBP2/RBM4B/TNRC6C/EEF2/ZFP36/ZFP36L2/POLDIP3/CPEB4/FOXO3/RNF139/TRUB2	16
BP	GO:0098813	nuclear chromosome segregation	12/494	210/10468	0.2887	0.957229	0.957229	SFPQ/MSTO1/FEN1/ATM/NUSAP1/CDT1/CDC6/STAG1/PDS5A/UBE2B/BOD1/STAG3L2	12
BP	GO:0061008	hepaticobiliary system development	6/494	95/10468	0.291559	0.957229	0.957229	RPS6KA1/ACAT1/PKD1/CEBPB/HES1/CITED2	6
BP	GO:1902107	positive regulation of leukocyte differentiation	6/494	95/10468	0.291559	0.957229	0.957229	SOCS1/AP3D1/RUNX1/AGER/MYB/TRIB1	6
BP	GO:0002088	lens development in camera-type eye	3/494	40/10468	0.292067	0.957229	0.957229	CDKN1C/CRYGS/HIPK2	3
BP	GO:0006284	base-excision repair	3/494	40/10468	0.292067	0.957229	0.957229	FEN1/UNG/NEIL1	3
BP	GO:2001057	reactive nitrogen species metabolic process	3/494	40/10468	0.292067	0.957229	0.957229	NOS1AP/ICAM1/SPR	3
BP	GO:0033674	positive regulation of kinase activity	20/494	369/10468	0.292226	0.957229	0.957229	CLSPN/MARK2/CCND2/AJUBA/MAP4K5/PKD1/SOCS1/GPRC5B/CDC6/RPTOR/PAK4/SPDYA/PRKAR2A/TNIK/FGF18/AGER/MAPK14/CCND3/VEGFA/NBN	20
BP	GO:0006805	xenobiotic metabolic process	4/494	58/10468	0.292438	0.957229	0.957229	GSTM3/CYP2R1/SULT1A3/CYP2S1	4
BP	GO:0032411	positive regulation of transporter activity	4/494	58/10468	0.292438	0.957229	0.957229	RNF207/NOS1AP/STIM1/GLRX	4
BP	GO:0035710	CD4-positive, alpha-beta T cell activation	4/494	58/10468	0.292438	0.957229	0.957229	SOCS1/RUNX1/AGER/MYB	4
BP	GO:0048207	vesicle targeting, rough ER to cis-Golgi	4/494	58/10468	0.292438	0.957229	0.957229	TMED2/SEC23A/SEC13/SEC24B	4
BP	GO:0048208	COPII vesicle coating	4/494	58/10468	0.292438	0.957229	0.957229	TMED2/SEC23A/SEC13/SEC24B	4
BP	GO:0009108	coenzyme biosynthetic process	12/494	211/10468	0.294188	0.957229	0.957229	ACOT7/MPC2/HKDC1/ECD/ACAT1/ALDOC/NUP85/SPR/SEC13/COQ2/PCBD2/COQ4	12
BP	GO:0045786	negative regulation of cell cycle	26/494	490/10468	0.294521	0.957229	0.957229	CLSPN/PLK3/ORC1/DTL/INTS7/CDKN1C/ATM/RAD51/PKD1/BRD7/CDT1/CRLF3/PSMD3/CDC6/RPTOR/ARID3A/RHOB/ZFP36L2/PSME4/PSMF1/CLOCK/PSMB8/MAPK14/NBN/FBXO43/MYC	26
BP	GO:0002067	glandular epithelial cell differentiation	2/494	23/10468	0.296338	0.957229	0.957229	HES1/CLOCK	2
BP	GO:0006471	protein ADP-ribosylation	2/494	23/10468	0.296338	0.957229	0.957229	PARP14/TIPARP	2
BP	GO:0030224	monocyte differentiation	2/494	23/10468	0.296338	0.957229	0.957229	VEGFA/MYC	2
BP	GO:0031018	endocrine pancreas development	2/494	23/10468	0.296338	0.957229	0.957229	HES1/CLOCK	2
BP	GO:0045191	regulation of isotype switching	2/494	23/10468	0.296338	0.957229	0.957229	EXOSC6/ATAD5	2
BP	GO:0045616	regulation of keratinocyte differentiation	2/494	23/10468	0.296338	0.957229	0.957229	ZFP36/RUNX1	2
BP	GO:0051788	response to misfolded protein	2/494	23/10468	0.296338	0.957229	0.957229	UGGT1/SDF2L1	2
BP	GO:0060421	positive regulation of heart growth	2/494	23/10468	0.296338	0.957229	0.957229	MAPK14/ZFPM2	2
BP	GO:0071634	regulation of transforming growth factor beta production	2/494	23/10468	0.296338	0.957229	0.957229	LTBP1/MYB	2
BP	GO:0071827	plasma lipoprotein particle organization	2/494	23/10468	0.296338	0.957229	0.957229	MTTP/LPL	2
BP	GO:0090162	establishment of epithelial cell polarity	2/494	23/10468	0.296338	0.957229	0.957229	SIPA1L3/HES1	2
BP	GO:0097242	amyloid-beta clearance	2/494	23/10468	0.296338	0.957229	0.957229	LRPAP1/CYP51A1	2
BP	GO:1903131	mononuclear cell differentiation	2/494	23/10468	0.296338	0.957229	0.957229	VEGFA/MYC	2
BP	GO:0065004	protein-DNA complex assembly	9/494	153/10468	0.296627	0.957229	0.957229	SART3/ERCC5/RAD51/OIP5/RRN3/CDT1/ASF1B/SHPRH/POLR1E	9
BP	GO:0042158	lipoprotein biosynthetic process	5/494	77/10468	0.297964	0.957229	0.957229	PIGC/GLUL/WIPI1/ZDHHC19/PIGZ	5
BP	GO:0042752	regulation of circadian rhythm	5/494	77/10468	0.297964	0.957229	0.957229	SFPQ/RBM4B/PSPC1/CLOCK/GNAQ	5
BP	GO:0032259	methylation	15/494	271/10468	0.298812	0.957229	0.957229	MTHFR/NSUN4/ARID4B/COMTD1/PWP1/SETD1A/NDUFAF7/FBXO11/TRMT10A/MYB/NSUN5P2/METTL2B/MYC/PHF19/NTMT1	15
BP	GO:0006935	chemotaxis	16/494	291/10468	0.29961	0.957229	0.957229	NBL1/RAP1GAP/ARTN/UNC5B/ROBO3/NUP85/PIP5K1C/SPTBN4/PPM1F/PLXNB1/FGF18/AGER/MAPK14/VEGFA/DOK2/EFNB1	16
BP	GO:0006613	cotranslational protein targeting to membrane	6/494	96/10468	0.299843	0.957229	0.957229	RPL22/RPL11/RPS27/SRP9/RPL41/SRP14	6
BP	GO:0006633	fatty acid biosynthetic process	6/494	96/10468	0.299843	0.957229	0.957229	ACOT7/ASAH2B/ACSM3/SCAP/TBXAS1/LPL	6
BP	GO:0030218	erythrocyte differentiation	6/494	96/10468	0.299843	0.957229	0.957229	ZFP36/HSPA9/MAPK14/VEGFA/FOXO3/HIPK2	6
BP	GO:0035264	multicellular organism growth	6/494	96/10468	0.299843	0.957229	0.957229	CDKN1C/ATM/TMED2/RAI1/SPTBN4/EN1	6
BP	GO:0016570	histone modification	20/494	371/10468	0.300559	0.957229	0.957229	MTHFR/SFPQ/ARID4B/ATM/KANSL2/PWP1/SART3/SETD1A/BRD7/ATXN7L3/KAT7/PPM1F/ATXN7/CLOCK/UBE2B/C6orf89/VEGFA/MYB/PHF19/NTMT1	20
BP	GO:0030111	regulation of Wnt signaling pathway	13/494	232/10468	0.301471	0.957229	0.957229	BAMBI/GPRC5B/PSMD3/SMURF2/PSME4/USP34/PSMF1/RUNX1/UBE2B/PSMB8/MAPK14/FOXO3/GNAQ	13
BP	GO:0140053	mitochondrial gene expression	9/494	154/10468	0.303148	0.957229	0.957229	NSUN4/DAP3/MRPS16/MRPL49/MRPL38/TRMT10A/FOXO3/MRPS33/TRUB2	9
BP	GO:0002702	positive regulation of production of molecular mediator of immune response	4/494	59/10468	0.303181	0.957229	0.957229	GPRC5B/EXOSC6/ATAD5/MAPK14	4
BP	GO:0010595	positive regulation of endothelial cell migration	4/494	59/10468	0.303181	0.957229	0.957229	RHOB/AAMP/FGF18/VEGFA	4
BP	GO:0030219	megakaryocyte differentiation	4/494	59/10468	0.303181	0.957229	0.957229	AGO1/SETD1A/TNRC6C/RUNX1	4
BP	GO:0046128	purine ribonucleoside metabolic process	4/494	59/10468	0.303181	0.957229	0.957229	AHCYL1/HDDC3/APRT/AHCYL2	4
BP	GO:0007507	heart development	18/494	332/10468	0.304896	0.957229	0.957229	RNF207/DHRS3/ATM/TMED2/TPM1/PKD1/TBX6/EPOR/DAND5/LTBP1/ACVR1/HES1/SEC24B/MAPK14/PRICKLE4/VEGFA/CITED2/ZFPM2	18
BP	GO:0043254	regulation of protein complex assembly	18/494	332/10468	0.304896	0.957229	0.957229	LMOD1/ATM/BBS10/ARPC3/ERCC5/AJUBA/VPS18/RRN3/COTL1/PIEZO1/CDT1/NCLN/ICAM1/PLEKHG2/SPTBN4/CAPG/SEC24B/VEGFA	18
BP	GO:1901652	response to peptide	18/494	332/10468	0.304896	0.957229	0.957229	SORT1/AHCYL1/EIF4EBP2/ZNF106/SOCS1/APRT/CDC6/KAT7/ICAM1/LPIN3/SCAP/PRKAR2A/AGER/MAPK14/CCND3/FOXO3/LPL/GNRH1	18
BP	GO:0006378	mRNA polyadenylation	3/494	41/10468	0.305149	0.957229	0.957229	AHCYL1/ZC3H14/SUPT5H	3
BP	GO:0009798	axis specification	3/494	41/10468	0.305149	0.957229	0.957229	TMED2/TBX6/CITED2	3
BP	GO:0030042	actin filament depolymerization	3/494	41/10468	0.305149	0.957229	0.957229	LMOD1/SPTBN4/CAPG	3
BP	GO:0034121	regulation of toll-like receptor signaling pathway	3/494	41/10468	0.305149	0.957229	0.957229	TYRO3/PTPRS/LRRC14	3
BP	GO:0034308	primary alcohol metabolic process	3/494	41/10468	0.305149	0.957229	0.957229	DHRS3/SULT1A3/GDPD1	3
BP	GO:0043631	RNA polyadenylation	3/494	41/10468	0.305149	0.957229	0.957229	AHCYL1/ZC3H14/SUPT5H	3
BP	GO:0051785	positive regulation of nuclear division	3/494	41/10468	0.305149	0.957229	0.957229	NUSAP1/CDT1/UBE2B	3
BP	GO:0070192	chromosome organization involved in meiotic cell cycle	3/494	41/10468	0.305149	0.957229	0.957229	ATM/RAD51/UBE2B	3
BP	GO:0060070	canonical Wnt signaling pathway	12/494	213/10468	0.305251	0.957229	0.957229	BAMBI/GPRC5B/PSMD3/SMURF2/PSME4/USP34/PSMF1/UBE2B/PSMB8/MAPK14/FOXO3/GNAQ	12
BP	GO:0051028	mRNA transport	8/494	135/10468	0.30555	0.957229	0.957229	SRRM1/NPIPA1/SMG1/NUP85/ZFP36/POLDIP3/SEC13/XPO7	8
BP	GO:0048515	spermatid differentiation	5/494	78/10468	0.307286	0.957229	0.957229	CATSPER2/PCSK4/PSME4/UBE2B/TTC26	5
BP	GO:0033209	tumor necrosis factor-mediated signaling pathway	7/494	116/10468	0.307353	0.957229	0.957229	PSMD3/PSME4/PSMF1/SPATA2/LTB/PSMB8/FOXO3	7
BP	GO:0097479	synaptic vesicle localization	6/494	97/10468	0.308172	0.957229	0.957229	VPS18/SNAP23/AP3S2/AP3D1/PIP5K1C/BLOC1S4	6
BP	GO:0001525	angiogenesis	15/494	273/10468	0.308624	0.957229	0.957229	AGO1/GLUL/UNC5B/STIM1/PAK4/RHOB/HS6ST1/ACVR1/AAMP/RUNX1/HYAL1/FGF18/MAPK14/VEGFA/HIPK2	15
BP	GO:0042330	taxis	16/494	293/10468	0.309087	0.957229	0.957229	NBL1/RAP1GAP/ARTN/UNC5B/ROBO3/NUP85/PIP5K1C/SPTBN4/PPM1F/PLXNB1/FGF18/AGER/MAPK14/VEGFA/DOK2/EFNB1	16
BP	GO:0030705	cytoskeleton-dependent intracellular transport	9/494	155/10468	0.309703	0.957229	0.957229	SFPQ/IFT46/AP3S2/SPG7/AP3D1/DYNLRB1/BLOC1S4/TTC26/PCM1	9
BP	GO:1903050	regulation of proteolysis involved in cellular protein catabolic process	10/494	175/10468	0.312711	0.957229	0.957229	RPL11/PLK3/PKD1/TLK2/TRIB2/PSMF1/CAMLG/HIPK2/RNF139/TRIB1	10
BP	GO:0006790	sulfur compound metabolic process	14/494	254/10468	0.313004	0.957229	0.957229	ACOT7/MTHFR/GSTM3/AHCYL1/MPC2/ACAT1/ISCU/ACSM3/SULT1A3/SULT1A4/HYAL1/EGFLAM/HSPA9/AHCYL2	14
BP	GO:0046394	carboxylic acid biosynthetic process	16/494	294/10468	0.313858	0.957229	0.957229	ACOT7/MTHFR/GLUL/PYCR2/ASAH2B/HKDC1/ECD/ACSM3/ALDOC/NUP85/GAD1/SEC13/SCAP/HYAL1/TBXAS1/LPL	16
BP	GO:0048193	Golgi vesicle transport	17/494	314/10468	0.313935	0.957229	0.957229	SORT1/ARL1/TMED2/SEC23A/SNAP23/LLGL1/GOSR1/WIPI1/COG1/NAPG/AP3D1/SPTBN4/SEC13/SEC24B/TMED7/TMED4/RNF139	17
BP	GO:0002708	positive regulation of lymphocyte mediated immunity	4/494	60/10468	0.313968	0.957229	0.957229	EXOSC6/ATAD5/MICB/ULBP2	4
BP	GO:0006334	nucleosome assembly	4/494	60/10468	0.313968	0.957229	0.957229	SART3/OIP5/ASF1B/SHPRH	4
BP	GO:0007605	sensory perception of sound	4/494	60/10468	0.313968	0.957229	0.957229	TIMM8B/ICAM1/SPTBN4/FBXO11	4
BP	GO:0022037	metencephalon development	4/494	60/10468	0.313968	0.957229	0.957229	TTBK2/PTPRS/EN1/SEC24B	4
BP	GO:0043154	negative regulation of cysteine-type endopeptidase activity involved in apoptotic process	4/494	60/10468	0.313968	0.957229	0.957229	RPS6KA1/IFI6/YWHAE/VEGFA	4
BP	GO:0045621	positive regulation of lymphocyte differentiation	4/494	60/10468	0.313968	0.957229	0.957229	SOCS1/AP3D1/RUNX1/MYB	4
BP	GO:1903312	negative regulation of mRNA metabolic process	4/494	60/10468	0.313968	0.957229	0.957229	ZC3H14/ZFP36/SUPT5H/MAPK14	4
BP	GO:0001658	branching involved in ureteric bud morphogenesis	2/494	24/10468	0.314043	0.957229	0.957229	VEGFA/MYC	2
BP	GO:0001912	positive regulation of leukocyte mediated cytotoxicity	2/494	24/10468	0.314043	0.957229	0.957229	MICB/ULBP2	2
BP	GO:0002714	positive regulation of B cell mediated immunity	2/494	24/10468	0.314043	0.957229	0.957229	EXOSC6/ATAD5	2
BP	GO:0002891	positive regulation of immunoglobulin mediated immune response	2/494	24/10468	0.314043	0.957229	0.957229	EXOSC6/ATAD5	2
BP	GO:0007140	male meiotic nuclear division	2/494	24/10468	0.314043	0.957229	0.957229	ATM/SPDYA	2
BP	GO:0007566	embryo implantation	2/494	24/10468	0.314043	0.957229	0.957229	UBE2Q1/SMURF2	2
BP	GO:0009649	entrainment of circadian clock	2/494	24/10468	0.314043	0.957229	0.957229	RBM4B/GNAQ	2
BP	GO:0009948	anterior/posterior axis specification	2/494	24/10468	0.314043	0.957229	0.957229	TMED2/TBX6	2
BP	GO:0014014	negative regulation of gliogenesis	2/494	24/10468	0.314043	0.957229	0.957229	DLX1/HES1	2
BP	GO:0034113	heterotypic cell-cell adhesion	2/494	24/10468	0.314043	0.957229	0.957229	CD58/AGER	2
BP	GO:0034405	response to fluid shear stress	2/494	24/10468	0.314043	0.957229	0.957229	PKD1/CITED2	2
BP	GO:0034661	ncRNA catabolic process	2/494	24/10468	0.314043	0.957229	0.957229	EXOSC6/EXOSC2	2
BP	GO:0036003	positive regulation of transcription from RNA polymerase II promoter in response to stress	2/494	24/10468	0.314043	0.957229	0.957229	CEBPB/VEGFA	2
BP	GO:0045648	positive regulation of erythrocyte differentiation	2/494	24/10468	0.314043	0.957229	0.957229	MAPK14/FOXO3	2
BP	GO:0050691	regulation of defense response to virus by host	2/494	24/10468	0.314043	0.957229	0.957229	MICB/RNF216	2
BP	GO:0050706	regulation of interleukin-1 beta secretion	2/494	24/10468	0.314043	0.957229	0.957229	SERPINB1/LPL	2
BP	GO:0070129	regulation of mitochondrial translation	2/494	24/10468	0.314043	0.957229	0.957229	NSUN4/TRUB2	2
BP	GO:1901661	quinone metabolic process	2/494	24/10468	0.314043	0.957229	0.957229	COQ2/COQ4	2
BP	GO:2000765	regulation of cytoplasmic translation	2/494	24/10468	0.314043	0.957229	0.957229	EEF2/CPEB4	2
BP	GO:0018107	peptidyl-threonine phosphorylation	6/494	98/10468	0.31654	0.957229	0.957229	MARK2/CDC42BPG/TTBK2/RPTOR/ACVR1/HIPK2	6
BP	GO:1902652	secondary alcohol metabolic process	6/494	98/10468	0.31654	0.957229	0.957229	HSD17B7/LBR/GGPS1/CYP2R1/SCAP/CYP51A1	6
BP	GO:0055088	lipid homeostasis	5/494	79/10468	0.316649	0.957229	0.957229	ACSM3/MTTP/MYLIP/LPL/ABCA2	5
BP	GO:0001756	somitogenesis	3/494	42/10468	0.318254	0.957229	0.957229	ATM/TMED2/TBX6	3
BP	GO:0007422	peripheral nervous system development	3/494	42/10468	0.318254	0.957229	0.957229	ARTN/GSTM3/RUNX1	3
BP	GO:0032651	regulation of interleukin-1 beta production	3/494	42/10468	0.318254	0.957229	0.957229	SERPINB1/AGER/LPL	3
BP	GO:0042446	hormone biosynthetic process	3/494	42/10468	0.318254	0.957229	0.957229	HSD17B7/CYP17A1/CYP2R1	3
BP	GO:0061014	positive regulation of mRNA catabolic process	3/494	42/10468	0.318254	0.957229	0.957229	TNRC6C/ZFP36/ZFP36L2	3
BP	GO:0099518	vesicle cytoskeletal trafficking	3/494	42/10468	0.318254	0.957229	0.957229	AP3S2/AP3D1/BLOC1S4	3
BP	GO:0110110	positive regulation of animal organ morphogenesis	3/494	42/10468	0.318254	0.957229	0.957229	ACVR1/VEGFA/MYC	3
BP	GO:1901019	regulation of calcium ion transmembrane transporter activity	3/494	42/10468	0.318254	0.957229	0.957229	NOS1AP/STIM1/YWHAE	3
BP	GO:0016053	organic acid biosynthetic process	16/494	295/10468	0.318649	0.957229	0.957229	ACOT7/MTHFR/GLUL/PYCR2/ASAH2B/HKDC1/ECD/ACSM3/ALDOC/NUP85/GAD1/SEC13/SCAP/HYAL1/TBXAS1/LPL	16
BP	GO:0000723	telomere maintenance	8/494	137/10468	0.319651	0.957229	0.957229	FEN1/ATM/RAD51/SMG1/PRIM2/NBN/MYC/RECQL4	8
BP	GO:0007281	germ cell development	8/494	137/10468	0.319651	0.957229	0.957229	ATM/CATSPER2/PCSK4/PSME4/ACVR1/UBE2B/FOXO3/TTC26	8
BP	GO:0051272	positive regulation of cellular component movement	16/494	296/10468	0.323459	0.957229	0.957229	RNF207/NOS1AP/ATM/SMURF2/ICAM1/RHOB/ACVR1/AAMP/PPM1F/CAPN7/ELP6/HYAL1/FGF18/AGER/MAPK14/VEGFA	16
BP	GO:0042278	purine nucleoside metabolic process	4/494	61/10468	0.324787	0.957229	0.957229	AHCYL1/HDDC3/APRT/AHCYL2	4
BP	GO:0045639	positive regulation of myeloid cell differentiation	4/494	61/10468	0.324787	0.957229	0.957229	RUNX1/MAPK14/FOXO3/TRIB1	4
BP	GO:0060968	regulation of gene silencing	6/494	99/10468	0.324944	0.957229	0.957229	AGO1/ZC3H10/AJUBA/NUP85/ZFP36/SEC13	6
BP	GO:0019080	viral gene expression	10/494	177/10468	0.325166	0.957229	0.957229	RPL22/RPL11/RPS27/EIF2D/RPL41/NUP85/ZFP36/SUPT5H/SEC13/ZNF639	10
BP	GO:0032200	telomere organization	8/494	138/10468	0.326748	0.957229	0.957229	FEN1/ATM/RAD51/SMG1/PRIM2/NBN/MYC/RECQL4	8
BP	GO:1901215	negative regulation of neuron death	8/494	138/10468	0.326748	0.957229	0.957229	UNC5B/TYRO3/SULT1A3/EN1/DLX1/CEBPB/CPEB4/HIPK2	8
BP	GO:0030833	regulation of actin filament polymerization	7/494	119/10468	0.330317	0.957229	0.957229	LMOD1/ARPC3/COTL1/ICAM1/PLEKHG2/SPTBN4/CAPG	7
BP	GO:0008344	adult locomotory behavior	3/494	43/10468	0.331366	0.957229	0.957229	SPTBN4/EN1/HIPK2	3
BP	GO:0014812	muscle cell migration	3/494	43/10468	0.331366	0.957229	0.957229	TPM1/AAMP/TRIB1	3
BP	GO:0035308	negative regulation of protein dephosphorylation	3/494	43/10468	0.331366	0.957229	0.957229	ENSA/YWHAE/BOD1	3
BP	GO:1903201	regulation of oxidative stress-induced cell death	3/494	43/10468	0.331366	0.957229	0.957229	SFPQ/MCL1/FOXO3	3
BP	GO:2001244	positive regulation of intrinsic apoptotic signaling pathway	3/494	43/10468	0.331366	0.957229	0.957229	RPL11/SFPQ/MCL1	3
BP	GO:0006888	ER to Golgi vesicle-mediated transport	10/494	178/10468	0.331432	0.957229	0.957229	TMED2/SEC23A/GOSR1/COG1/SPTBN4/SEC13/SEC24B/TMED7/TMED4/RNF139	10
BP	GO:0018345	protein palmitoylation	2/494	25/10468	0.331647	0.957229	0.957229	GLUL/ZDHHC19	2
BP	GO:0032731	positive regulation of interleukin-1 beta production	2/494	25/10468	0.331647	0.957229	0.957229	AGER/LPL	2
BP	GO:0034383	low-density lipoprotein particle clearance	2/494	25/10468	0.331647	0.957229	0.957229	AP2S1/MYLIP	2
BP	GO:0046636	negative regulation of alpha-beta T cell activation	2/494	25/10468	0.331647	0.957229	0.957229	SOCS1/RUNX1	2
BP	GO:0060043	regulation of cardiac muscle cell proliferation	2/494	25/10468	0.331647	0.957229	0.957229	MAPK14/ZFPM2	2
BP	GO:0061900	glial cell activation	2/494	25/10468	0.331647	0.957229	0.957229	ATM/AGER	2
BP	GO:0071480	cellular response to gamma radiation	2/494	25/10468	0.331647	0.957229	0.957229	ATM/TLK2	2
BP	GO:0071604	transforming growth factor beta production	2/494	25/10468	0.331647	0.957229	0.957229	LTBP1/MYB	2
BP	GO:0086003	cardiac muscle cell contraction	2/494	25/10468	0.331647	0.957229	0.957229	RNF207/NOS1AP	2
BP	GO:0007600	sensory perception	12/494	218/10468	0.33336	0.957229	0.957229	DHRS3/TIMM8B/BBS10/ZFHX2/REEP6/OLFM2/ICAM1/SPTBN4/FBXO11/ATXN7/CRYGS/RRH	12
BP	GO:0072330	monocarboxylic acid biosynthetic process	12/494	218/10468	0.33336	0.957229	0.957229	ACOT7/ASAH2B/HKDC1/ECD/ACSM3/ALDOC/NUP85/GAD1/SEC13/SCAP/TBXAS1/LPL	12
BP	GO:0034341	response to interferon-gamma	6/494	100/10468	0.333377	0.957229	0.957229	CD58/SOCS1/ICAM1/CDC37/PARP14/HLA-DPB1	6
BP	GO:0045088	regulation of innate immune response	15/494	278/10468	0.333526	0.957229	0.957229	SFPQ/PSPC1/TYRO3/SOCS1/PSMD3/EPG5/PTPRS/CDC37/PSME4/PSMF1/PARP14/PSMB8/MICB/ULBP2/LRRC14	15
BP	GO:0002687	positive regulation of leukocyte migration	4/494	62/10468	0.335631	0.957229	0.957229	ICAM1/AGER/MAPK14/VEGFA	4
BP	GO:0006901	vesicle coating	4/494	62/10468	0.335631	0.957229	0.957229	TMED2/SEC23A/SEC13/SEC24B	4
BP	GO:0090502	RNA phosphodiester bond hydrolysis, endonucleolytic	4/494	62/10468	0.335631	0.957229	0.957229	AGO1/FEN1/RPP21/POP7	4
BP	GO:1901879	regulation of protein depolymerization	4/494	62/10468	0.335631	0.957229	0.957229	LMOD1/TTBK2/SPTBN4/CAPG	4
BP	GO:0006694	steroid biosynthetic process	7/494	120/10468	0.338031	0.957229	0.957229	HSD17B7/LBR/GGPS1/CYP17A1/CYP2R1/SCAP/CYP51A1	7
BP	GO:0035194	posttranscriptional gene silencing by RNA	7/494	120/10468	0.338031	0.957229	0.957229	AGO1/ZC3H10/AJUBA/NUP85/TNRC6C/ZFP36/SEC13	7
BP	GO:0032147	activation of protein kinase activity	12/494	219/10468	0.339049	0.957229	0.957229	CLSPN/MARK2/MAP4K5/SOCS1/GPRC5B/RPTOR/PAK4/SPDYA/PRKAR2A/TNIK/MAPK14/VEGFA	12
BP	GO:0002449	lymphocyte mediated immunity	8/494	140/10468	0.341022	0.957229	0.957229	UNG/EXOSC6/ATAD5/ICAM1/AGER/MICB/ULBP2/NBN	8
BP	GO:0050821	protein stabilization	8/494	140/10468	0.341022	0.957229	0.957229	RPL11/IFT46/NAPG/NCLN/CDC37/UBE2B/CAMLG/GNAQ	8
BP	GO:0016569	covalent chromatin modification	20/494	381/10468	0.343263	0.957229	0.957229	MTHFR/SFPQ/ARID4B/ATM/KANSL2/PWP1/SART3/SETD1A/BRD7/ATXN7L3/KAT7/PPM1F/ATXN7/CLOCK/UBE2B/C6orf89/VEGFA/MYB/PHF19/NTMT1	20
[truncated: 3,824 more rows]
