# Supplementary material for: Cell cycle arrest explains the observed bulk 3D genomic alterations in response to long-term heat shock in K562 cells
Source: HighWire-hosted journal article supplement (doi:10.1101/gr.276554.122), 2022-07-01
Supplement: Supplemental_Table_S3.xlsx [file Supplemental_Table_S3.xlsx]

## Sheet: NHS
GO enrichment results of genes, the promoters of which lie in the anchors of LHS-specific loops in G2/M phase cells. Results of comparison between LHS and both NHS and SHS were listed in different sheets, respectively.
ONTOLOGY	ID	Description	GeneRatio	BgRatio	pvalue	p.adjust	qvalue	geneID	Count
BP	GO:0046660	female sex differentiation	16/891	74/10468	0.000401018	0.92687	0.92687	ARID5B/ATM/BRCA2/TYRO3/ARRB2/KMT2B/CEBPB/NRIP1/DMC1/FOXL2/TIPARP/GDF9/BAK1/FOXO3/IMMP2L/ZFPM2	16
BP	GO:0008585	female gonad development	14/891	64/10468	0.000803587	0.92687	0.92687	ARID5B/ATM/BRCA2/ARRB2/KMT2B/CEBPB/NRIP1/DMC1/FOXL2/TIPARP/GDF9/FOXO3/IMMP2L/ZFPM2	14
BP	GO:0006418	tRNA aminoacylation for protein translation	8/891	26/10468	0.0010399	0.92687	0.92687	WARS2/DARS2/YARS2/SARS2/MARS2/PPA2/EEF1E1/AIMP2	8
BP	GO:0046545	development of primary female sexual characteristics	14/891	66/10468	0.00110814	0.92687	0.92687	ARID5B/ATM/BRCA2/ARRB2/KMT2B/CEBPB/NRIP1/DMC1/FOXL2/TIPARP/GDF9/FOXO3/IMMP2L/ZFPM2	14
BP	GO:0000083	regulation of transcription involved in G1/S transition of mitotic cell cycle	8/891	27/10468	0.00136897	0.92687	0.92687	NPAT/ZPR1/CDT1/CDC6/ID2/RRM2/BACH1/CDC45	8
BP	GO:0010212	response to ionizing radiation	21/891	122/10468	0.00138573	0.92687	0.92687	EYA3/INTS7/CYP2R1/KAT5/RAD9A/CCND1/ATM/MDM2/RAD9B/BRCA2/RAD51/RPL26/TLK2/XRCC5/THBD/BAK1/MAPK14/NAMPT/PAXIP1/MYC/SWI5	21
BP	GO:0006336	DNA replication-independent nucleosome assembly	9/891	35/10468	0.00209538	0.92687	0.92687	NASP/ITGB3BP/CENPL/OIP5/ASF1B/CENPO/HJURP/HIRA/CENPC	9
BP	GO:0031016	pancreas development	9/891	35/10468	0.00209538	0.92687	0.92687	GDF11/MEIS2/ALDH1A2/FOXA2/NPHP3/HES1/BAK1/IL6/CDK6	9
BP	GO:0043039	tRNA aminoacylation	8/891	29/10468	0.00227201	0.92687	0.92687	WARS2/DARS2/YARS2/SARS2/MARS2/PPA2/EEF1E1/AIMP2	8
BP	GO:0010039	response to iron ion	7/891	23/10468	0.00229959	0.92687	0.92687	CCND1/MDM2/B2M/CYBRD1/CPOX/ACO1/ATP7A	7
BP	GO:0034724	DNA replication-independent nucleosome organization	9/891	36/10468	0.0025867	0.92687	0.92687	NASP/ITGB3BP/CENPL/OIP5/ASF1B/CENPO/HJURP/HIRA/CENPC	9
BP	GO:0043038	amino acid activation	8/891	30/10468	0.00287096	0.92687	0.92687	WARS2/DARS2/YARS2/SARS2/MARS2/PPA2/EEF1E1/AIMP2	8
BP	GO:0008285	negative regulation of cell proliferation	49/891	386/10468	0.00287876	0.92687	0.92687	FBXO2/PTPRU/XCL1/CDKN1C/TSG101/ATM/PTHLH/ARID2/C1QL4/GDF11/BTG1/BRCA2/TGFB3/KLF13/B2M/ALDH1A2/TPM1/BRD7/MED31/CDC6/PHB/NME1/AXIN2/PDCD5/ID2/CEBPB/BTG3/PLXNB1/IFT80/PDCD10/BCL6/HES1/EEF1E1/JARID2/E2F3/BAK1/CD164/SOD2/AIMP2/IL6/KRIT1/CDK6/TRIM24/PINX1/CNOT7/TRIB1/MYC/JAK2/DLG3	49
BP	GO:0006333	chromatin assembly or disassembly	17/891	97/10468	0.00314249	0.92687	0.92687	NASP/ITGB3BP/CENPL/ARID2/SMARCC2/SART3/OIP5/TLK2/ASF1B/CENPO/TLK1/HJURP/HIRA/CENPC/SHPRH/GATAD1/SET	17
BP	GO:0009314	response to radiation	41/891	313/10468	0.00351564	0.92687	0.92687	EYA3/DTL/INTS7/ITGB1/CYP2R1/KAT5/RAD9A/CCND1/ATM/MDM2/RAD9B/BRCA2/ERCC5/CALM1/MEIS2/RAD51/NEDD4/SLC24A1/ERCC4/N4BP1/RBL2/RPL26/IFT20/TLK2/PNKP/ID2/XRCC5/THBD/DYNLRB1/ATF4/BHLHE40/CCR4/SLC7A11/BAK1/MAPK14/MAP3K4/NAMPT/PAXIP1/FNTA/MYC/SWI5	41
BP	GO:0055072	iron ion homeostasis	12/891	59/10468	0.00355457	0.92687	0.92687	NCOA4/ISCU/B2M/NUBP1/EPAS1/CYBRD1/FBXL5/SRI/CUL1/MYC/ACO1/LCN2	12
BP	GO:0009994	oocyte differentiation	8/891	31/10468	0.00358612	0.92687	0.92687	ATM/BRCA2/KMT2B/DMC1/FOXL2/YTHDC2/GDF9/FOXO3	8
BP	GO:0045646	regulation of erythrocyte differentiation	9/891	38/10468	0.00384041	0.92687	0.92687	KLF13/B2M/ZFP36/ID2/HSPA9/MAPK14/FOXO3/CDK6/NCAPG2	9
BP	GO:0006334	nucleosome assembly	12/891	60/10468	0.00410756	0.92687	0.92687	NASP/ITGB3BP/CENPL/SART3/OIP5/ASF1B/CENPO/HJURP/HIRA/CENPC/SHPRH/SET	12
BP	GO:0071479	cellular response to ionizing radiation	12/891	60/10468	0.00410756	0.92687	0.92687	INTS7/RAD9A/ATM/MDM2/RAD9B/RAD51/RPL26/TLK2/XRCC5/MAPK14/NAMPT/SWI5	12
BP	GO:0001914	regulation of T cell mediated cytotoxicity	5/891	14/10468	0.00460898	0.971084	0.971084	XCL1/FADD/B2M/AGER/STX7	5
BP	GO:0000280	nuclear division	40/891	310/10468	0.0050821	0.971084	0.971084	GPR3/RCC1/CDC14A/NEK2/SMC3/CDKN1C/ATM/AAAS/BRCA2/RAD51/NUSAP1/ERCC4/LCMT1/CDT1/SPAG5/RAD51D/CDC6/CHMP6/SPIRE1/SEH1L/ANAPC1/HIRA/RANBP1/DMC1/MEI1/CLASP2/STAG1/SMC4/NCAPG/ANAPC4/PDS5A/CENPC/MND1/BOD1/UBR2/PHIP/PINX1/FBXO43/CDC26/GOLGA2	40
BP	GO:0006879	cellular iron ion homeostasis	10/891	47/10468	0.005382	0.971084	0.971084	NCOA4/ISCU/NUBP1/CYBRD1/FBXL5/SRI/CUL1/MYC/ACO1/LCN2	10
BP	GO:0006260	DNA replication	33/891	245/10468	0.00546759	0.971084	0.971084	NASP/CDC7/DTL/SMC3/KAT5/RAD9A/ATM/ZPR1/GLI1/RAD9B/CDK2AP1/BRCA2/RAD51/CDT1/TNFAIP1/ATAD5/CDC6/KAT7/WDR18/PNKP/RRM2/CDC45/BCL6/POLN/PDS5A/WRNIP1/PRIM2/REV3L/DBF4/ACHE/NBN/RECQL4/SET	33
BP	GO:0042770	signal transduction in response to DNA damage	18/891	111/10468	0.00567506	0.971084	0.971084	SESN2/DTL/KAT5/ATM/MDM2/BRCA2/SPRED1/RBL2/RPL26/ATAD5/EEF1E1/MAPK14/FOXO3/CNOT4/HIPK2/PAXIP1/CNOT7/NBN	18
BP	GO:0034080	CENP-A containing nucleosome assembly	7/891	27/10468	0.00617219	0.971084	0.971084	NASP/ITGB3BP/CENPL/OIP5/CENPO/HJURP/CENPC	7
BP	GO:0061641	CENP-A containing chromatin organization	7/891	27/10468	0.00617219	0.971084	0.971084	NASP/ITGB3BP/CENPL/OIP5/CENPO/HJURP/CENPC	7
BP	GO:0010225	response to UV-C	5/891	15/10468	0.00643538	0.971084	0.971084	MDM2/BRCA2/ERCC5/BAK1/MAP3K4	5
BP	GO:0000082	G1/S transition of mitotic cell cycle	29/891	211/10468	0.00670765	0.971084	0.971084	RCC1/NASP/CDC7/ITGB1/CCND1/NPAT/ATM/ZPR1/CCND2/MDM2/BRD7/RBL2/CDT1/RPL26/CRLF3/CDC6/ID2/RRM2/BACH1/CDC45/JADE1/LSM11/PRIM2/DBF4/CDK6/CNOT4/CUL1/CNOT7/MYC	29
BP	GO:0006323	DNA packaging	17/891	105/10468	0.0071823	0.971084	0.971084	NASP/ITGB3BP/CENPL/SART3/OIP5/NUSAP1/ASF1B/CENPO/HJURP/HIRA/SMC4/NCAPG/CENPC/SHPRH/GATAD1/NCAPG2/SET	17
BP	GO:0071391	cellular response to estrogen stimulus	4/891	10/10468	0.00721177	0.971084	0.971084	SFR1/MDM2/PELP1/TRIM24	4
BP	GO:0048599	oocyte development	7/891	28/10468	0.00763771	0.971084	0.971084	ATM/BRCA2/DMC1/FOXL2/YTHDC2/GDF9/FOXO3	7
BP	GO:0032007	negative regulation of TOR signaling	8/891	35/10468	0.0079005	0.971084	0.971084	SESN2/ATM/SIK2/AKT1S1/NPRL2/FNIP1/UBR2/EPM2A	8
BP	GO:0044843	cell cycle G1/S phase transition	30/891	224/10468	0.00848182	0.971084	0.971084	RCC1/NASP/CDC7/ITGB1/CCND1/NPAT/ATM/ZPR1/CCND2/GLI1/MDM2/BRD7/RBL2/CDT1/RPL26/CRLF3/CDC6/ID2/RRM2/BACH1/CDC45/JADE1/LSM11/PRIM2/DBF4/CDK6/CNOT4/CUL1/CNOT7/MYC	30
BP	GO:0030330	DNA damage response, signal transduction by p53 class mediator	15/891	90/10468	0.00858271	0.971084	0.971084	SESN2/KAT5/ATM/MDM2/BRCA2/SPRED1/RBL2/RPL26/EEF1E1/FOXO3/CNOT4/HIPK2/PAXIP1/CNOT7/NBN	15
BP	GO:0034728	nucleosome organization	15/891	90/10468	0.00858271	0.971084	0.971084	NASP/ITGB3BP/VPS72/CENPL/ARID2/SMARCC2/SART3/OIP5/ASF1B/CENPO/HJURP/HIRA/CENPC/SHPRH/SET	15
BP	GO:0031497	chromatin assembly	13/891	74/10468	0.0090028	0.971084	0.971084	NASP/ITGB3BP/CENPL/SART3/OIP5/ASF1B/CENPO/HJURP/HIRA/CENPC/SHPRH/GATAD1/SET	13
BP	GO:0031055	chromatin remodeling at centromere	7/891	29/10468	0.00934498	0.971084	0.971084	NASP/ITGB3BP/CENPL/OIP5/CENPO/HJURP/CENPC	7
BP	GO:0007548	sex differentiation	23/891	161/10468	0.00943765	0.971084	0.971084	NASP/RAB13/NCOA4/ARID5B/CYP17A1/CCND1/ATM/BRCA2/TYRO3/ARRB2/KMT2B/CEBPB/NRIP1/DMC1/FOXL2/TIPARP/GDF9/BAK1/FOXO3/CITED2/NUDT1/IMMP2L/ZFPM2	23
BP	GO:0008406	gonad development	20/891	135/10468	0.0101247	0.971084	0.971084	NASP/RAB13/NCOA4/ARID5B/CCND1/ATM/BRCA2/ARRB2/KMT2B/CEBPB/NRIP1/DMC1/FOXL2/TIPARP/GDF9/FOXO3/CITED2/NUDT1/IMMP2L/ZFPM2	20
BP	GO:0071478	cellular response to radiation	21/891	144/10468	0.010185	0.971084	0.971084	INTS7/RAD9A/ATM/MDM2/RAD9B/CALM1/RAD51/NEDD4/ERCC4/N4BP1/RBL2/RPL26/TLK2/XRCC5/ATF4/BAK1/MAPK14/NAMPT/FNTA/MYC/SWI5	21
BP	GO:0006491	N-glycan processing	4/891	11/10468	0.0105784	0.971084	0.971084	MAN1A2/GNPTAB/FUT8/MAN1A1	4
BP	GO:0001541	ovarian follicle development	8/891	37/10468	0.0111439	0.971084	0.971084	ATM/ARRB2/KMT2B/CEBPB/DMC1/FOXL2/FOXO3/IMMP2L	8
BP	GO:0045598	regulation of fat cell differentiation	13/891	76/10468	0.011229	0.971084	0.971084	SORT1/C1QL4/ZFP36/ID2/TRIB2/ZFP36L2/CEBPB/HES1/MAPK14/IL6/CCDC71L/TMEM64/ZFPM2	13
BP	GO:1900151	regulation of nuclear-transcribed mRNA catabolic process, deadenylation-dependent decay	5/891	17/10468	0.0114965	0.971084	0.971084	CPEB3/TNRC6C/ZFP36/ZFP36L2/CNOT7	5
BP	GO:1900153	positive regulation of nuclear-transcribed mRNA catabolic process, deadenylation-dependent decay	5/891	17/10468	0.0114965	0.971084	0.971084	CPEB3/TNRC6C/ZFP36/ZFP36L2/CNOT7	5
BP	GO:0045637	regulation of myeloid cell differentiation	22/891	155/10468	0.0117875	0.971084	0.971084	HAX1/FADD/KLF13/MEIS2/B2M/NME1/TNRC6C/KMT2B/ZFP36/ID2/CASP8/CEBPB/RUNX1/HSPA9/MAPK14/FOXO3/CDK6/CNOT4/NCAPG2/TMEM64/TRIB1/MYC	22
BP	GO:0006261	DNA-dependent DNA replication	20/891	137/10468	0.0118354	0.971084	0.971084	CDC7/SMC3/ZPR1/CDK2AP1/BRCA2/RAD51/CDT1/ATAD5/CDC6/WDR18/PNKP/CDC45/BCL6/POLN/WRNIP1/PRIM2/REV3L/DBF4/NBN/RECQL4	20
BP	GO:0000819	sister chromatid segregation	23/891	165/10468	0.0125238	0.971084	0.971084	SFPQ/NEK2/SMC3/ATM/NUSAP1/LCMT1/CDT1/SPAG5/CDC6/AXIN2/CHMP6/SEH1L/ANAPC1/HIRA/STAG1/SMC4/NCAPG/ANAPC4/PDS5A/CENPC/BOD1/PINX1/CDC26	23
BP	GO:0002262	myeloid cell homeostasis	18/891	120/10468	0.0126022	0.971084	0.971084	KLF13/B2M/ZFP36/ID2/EPAS1/SLC25A38/BCL6/SLC7A11/HSPA9/BAK1/MAPK14/FOXO3/IL6/CDK6/HIPK2/NCAPG2/JAK2/PTBP3	18
BP	GO:0045137	development of primary sexual characteristics	20/891	138/10468	0.0127731	0.971084	0.971084	NASP/RAB13/NCOA4/ARID5B/CCND1/ATM/BRCA2/ARRB2/KMT2B/CEBPB/NRIP1/DMC1/FOXL2/TIPARP/GDF9/FOXO3/CITED2/NUDT1/IMMP2L/ZFPM2	20
BP	GO:0071824	protein-DNA complex subunit organization	25/891	184/10468	0.0129545	0.971084	0.971084	NASP/ITGB3BP/VPS72/CENPL/GTF2H1/ARID2/SMARCC2/SART3/ERCC5/RAD51/OIP5/CDT1/ASF1B/CENPO/HJURP/HIRA/CDC45/DMC1/CENPC/TAF7/SHPRH/MYC/POLR1E/SWI5/SET	25
BP	GO:0043486	histone exchange	8/891	38/10468	0.0130915	0.971084	0.971084	NASP/ITGB3BP/VPS72/CENPL/OIP5/CENPO/HJURP/CENPC	8
BP	GO:0010948	negative regulation of cell cycle process	35/891	280/10468	0.0134401	0.971084	0.971084	CDC7/PSMB4/NEK2/DTL/SMC3/PSMA1/CCND1/ATM/MDM2/RAD51/NUBP1/LCMT1/BRD7/RBL2/CDT1/RPL26/PCGF2/PSMB3/PSMD3/CDC6/RRM2/ZFP36L2/PSMF1/RYBP/BCL6/JADE1/CBX3/CDK6/CNOT4/CUL1/PINX1/CNOT7/NBN/FBXO43/PSMD5	35
BP	GO:0090329	regulation of DNA-dependent DNA replication	9/891	46/10468	0.0140813	0.971084	0.971084	CDC7/SMC3/BRCA2/CDT1/WDR18/BCL6/WRNIP1/DBF4/NBN	9
BP	GO:0061458	reproductive system development	33/891	262/10468	0.0144671	0.971084	0.971084	NASP/RAB13/UBE2Q1/NCOA4/ARID5B/CDKN1C/CCND1/ATM/GLI1/TMED2/BRCA2/TYRO3/ARRB2/KMT2B/EPAS1/CASP8/CEBPB/NRIP1/DMC1/FOXL2/TIPARP/HES1/GDF9/STC2/BAK1/MAPK14/PRDM1/FOXO3/CITED2/MAP3K4/NUDT1/IMMP2L/ZFPM2	33
BP	GO:0001916	positive regulation of T cell mediated cytotoxicity	4/891	12/10468	0.0148149	0.971084	0.971084	XCL1/FADD/B2M/STX7	4
BP	GO:0007141	male meiosis I	4/891	12/10468	0.0148149	0.971084	0.971084	BRCA2/DMC1/MEI1/UBR2	4
BP	GO:0030728	ovulation	4/891	12/10468	0.0148149	0.971084	0.971084	KMT2B/NRIP1/FOXO3/IMMP2L	4
BP	GO:0043501	skeletal muscle adaptation	4/891	12/10468	0.0148149	0.971084	0.971084	CAMK2G/TNNC1/GTF2IRD2/GTF2IRD2B	4
BP	GO:0043517	positive regulation of DNA damage response, signal transduction by p53 class mediator	4/891	12/10468	0.0148149	0.971084	0.971084	ATM/SPRED1/RPL26/EEF1E1	4
BP	GO:0051645	Golgi localization	4/891	12/10468	0.0148149	0.971084	0.971084	ARHGAP21/COPG1/PDCD10/YWHAZ	4
BP	GO:0060211	regulation of nuclear-transcribed mRNA poly(A) tail shortening	4/891	12/10468	0.0148149	0.971084	0.971084	CPEB3/TNRC6C/ZFP36/CNOT7	4
BP	GO:0060213	positive regulation of nuclear-transcribed mRNA poly(A) tail shortening	4/891	12/10468	0.0148149	0.971084	0.971084	CPEB3/TNRC6C/ZFP36/CNOT7	4
BP	GO:0035459	cargo loading into vesicle	5/891	18/10468	0.0148256	0.971084	0.971084	TMED2/SEC23A/SEC31A/SEC24B/SEC24D	5
BP	GO:0036507	protein demannosylation	5/891	18/10468	0.0148256	0.971084	0.971084	MAN1A2/EDEM3/OS9/EDEM1/MAN1A1	5
BP	GO:0036508	protein alpha-1,2-demannosylation	5/891	18/10468	0.0148256	0.971084	0.971084	MAN1A2/EDEM3/OS9/EDEM1/MAN1A1	5
BP	GO:0030218	erythrocyte differentiation	15/891	96/10468	0.01525	0.971084	0.971084	KLF13/B2M/ZFP36/ID2/EPAS1/SLC25A38/BCL6/HSPA9/MAPK14/FOXO3/CDK6/HIPK2/NCAPG2/JAK2/PTBP3	15
BP	GO:0090068	positive regulation of cell cycle process	28/891	215/10468	0.0153206	0.971084	0.971084	SFPQ/CDC7/CDC14A/DTL/CCND1/ATM/CCND2/GLI1/MDM2/NUSAP1/RBL2/CDT1/RPL26/SPAG5/CRLF3/ATAD5/CDK5R1/CDC6/ID2/CDC45/RANBP1/ANAPC4/LSM11/PHIP/DBF4/CNOT4/CNOT7/CSPP1	28
BP	GO:0033044	regulation of chromosome organization	35/891	284/10468	0.0164353	0.971084	0.971084	SFPQ/NEK2/ATM/SART3/ERCC4/LCMT1/BRD7/CDT1/CDC6/KAT7/TLK2/AXIN2/KMT2B/PNKP/ANAPC1/TLK1/XRCC5/CCT8/HIRA/CDC45/BCL6/ANAPC4/TAF7/JARID2/C6orf89/MAP3K4/HNRNPA2B1/PAXIP1/PINX1/NBN/UBR5/MYC/CDC26/PHF19/SET	35
BP	GO:0140014	mitotic nuclear division	29/891	227/10468	0.0175702	0.971084	0.971084	RCC1/CDC14A/NEK2/SMC3/CDKN1C/ATM/AAAS/NUSAP1/LCMT1/CDT1/SPAG5/CDC6/CHMP6/SEH1L/ANAPC1/HIRA/RANBP1/CLASP2/STAG1/SMC4/NCAPG/ANAPC4/PDS5A/CENPC/BOD1/PHIP/PINX1/CDC26/GOLGA2	29
BP	GO:0044786	cell cycle DNA replication	11/891	64/10468	0.0182184	0.971084	0.971084	CDC7/SMC3/ZPR1/BRCA2/RAD51/CDT1/ATAD5/CDC45/BCL6/PRIM2/DBF4	11
BP	GO:0002718	regulation of cytokine production involved in immune response	9/891	48/10468	0.0184145	0.971084	0.971084	BCL10/XCL1/TGFB3/B2M/GPRC5B/IL18R1/BCL6/MAPK14/IL6	9
BP	GO:0033002	muscle cell proliferation	16/891	107/10468	0.0184982	0.971084	0.971084	ARID2/GLI1/MDM2/TGFB3/TPM1/ID2/XRCC5/JARID2/MAPK14/MAP3K5/SOD2/IL6/NAMPT/ZFPM2/TRIB1/JAK2	16
BP	GO:0001910	regulation of leukocyte mediated cytotoxicity	7/891	33/10468	0.0190107	0.971084	0.971084	XCL1/FADD/B2M/ARRB2/AGER/STX7/ULBP2	7
BP	GO:0002720	positive regulation of cytokine production involved in immune response	7/891	33/10468	0.0190107	0.971084	0.971084	BCL10/XCL1/B2M/GPRC5B/IL18R1/MAPK14/IL6	7
BP	GO:0038066	p38MAPK cascade	7/891	33/10468	0.0190107	0.971084	0.971084	MAP2K3/PHLPP1/ZFP36/AGER/MAPK14/MAP3K5/MAP3K4	7
BP	GO:0051973	positive regulation of telomerase activity	7/891	33/10468	0.0190107	0.971084	0.971084	NEK2/NVL/PNKP/XRCC5/MAP3K4/HNRNPA2B1/MYC	7
BP	GO:0006275	regulation of DNA replication	14/891	90/10468	0.0193614	0.971084	0.971084	CDC7/SMC3/GLI1/BRCA2/CDT1/TNFAIP1/ATAD5/CDC6/WDR18/BCL6/PDS5A/WRNIP1/DBF4/NBN	14
BP	GO:0055076	transition metal ion homeostasis	14/891	90/10468	0.0193614	0.971084	0.971084	NCOA4/ISCU/B2M/NUBP1/AP3D1/EPAS1/CYBRD1/FBXL5/SRI/CUL1/MYC/ACO1/LCN2/ATP7A	14
BP	GO:0065004	protein-DNA complex assembly	21/891	153/10468	0.0193897	0.971084	0.971084	NASP/ITGB3BP/CENPL/GTF2H1/SART3/ERCC5/RAD51/OIP5/CDT1/ASF1B/CENPO/HJURP/HIRA/CDC45/DMC1/CENPC/TAF7/SHPRH/POLR1E/SWI5/SET	21
BP	GO:0001913	T cell mediated cytotoxicity	6/891	26/10468	0.0196198	0.971084	0.971084	XCL1/FADD/B2M/AGER/STX7/ULBP2	6
BP	GO:1904353	regulation of telomere capping	6/891	26/10468	0.0196198	0.971084	0.971084	NEK2/ATM/ERCC4/PNKP/MAP3K4/NBN	6
BP	GO:0051668	localization within membrane	15/891	99/10468	0.0198135	0.971084	0.971084	STX3/GPC6/SEC23A/GPHN/ADAM10/AP3D1/PICK1/SEC31A/SEC24B/SEC24D/SLC7A11/STX7/FNTA/DNM1/DLG3	15
BP	GO:0000722	telomere maintenance via recombination	4/891	13/10468	0.0199844	0.971084	0.971084	BRCA2/TEP1/RAD51/ERCC4	4
BP	GO:0033262	regulation of nuclear cell cycle DNA replication	4/891	13/10468	0.0199844	0.971084	0.971084	CDC7/CDT1/BCL6/DBF4	4
BP	GO:0034390	smooth muscle cell apoptotic process	4/891	13/10468	0.0199844	0.971084	0.971084	ARRB2/ATF4/E2F3/SOD2	4
BP	GO:0034391	regulation of smooth muscle cell apoptotic process	4/891	13/10468	0.0199844	0.971084	0.971084	ARRB2/ATF4/E2F3/SOD2	4
BP	GO:0042559	pteridine-containing compound biosynthetic process	4/891	13/10468	0.0199844	0.971084	0.971084	PCBD1/PTS/MTHFS/PCBD2	4
BP	GO:0045651	positive regulation of macrophage differentiation	4/891	13/10468	0.0199844	0.971084	0.971084	FADD/ID2/CASP8/TRIB1	4
BP	GO:0051315	attachment of mitotic spindle microtubules to kinetochore	4/891	13/10468	0.0199844	0.971084	0.971084	CDT1/SEH1L/CENPC/BOD1	4
BP	GO:1902969	mitotic DNA replication	4/891	13/10468	0.0199844	0.971084	0.971084	BRCA2/RAD51/CDC45/BCL6	4
BP	GO:0002683	negative regulation of immune system process	31/891	249/10468	0.0201983	0.971084	0.971084	NBL1/BCL10/PSMB4/XCL1/PSMA1/LPXN/FADD/ATM/TGFB3/KLF13/MEIS2/TYRO3/ARRB2/NME1/ZFP36/NR1H2/ID2/CEBPB/RUNX1/TLR9/PARP14/BCL6/HES1/HSPA9/ADTRP/CDK6/NCAPG2/CNOT7/TRIB1/MYC/LRRC14	31
BP	GO:0048608	reproductive structure development	32/891	259/10468	0.0204351	0.971084	0.971084	NASP/RAB13/NCOA4/ARID5B/CDKN1C/CCND1/ATM/GLI1/TMED2/BRCA2/TYRO3/ARRB2/KMT2B/EPAS1/CASP8/CEBPB/NRIP1/DMC1/FOXL2/TIPARP/HES1/GDF9/STC2/BAK1/MAPK14/PRDM1/FOXO3/CITED2/MAP3K4/NUDT1/IMMP2L/ZFPM2	32
BP	GO:0045638	negative regulation of myeloid cell differentiation	9/891	49/10468	0.0209111	0.971084	0.971084	KLF13/MEIS2/NME1/ZFP36/HSPA9/CDK6/NCAPG2/TRIB1/MYC	9
BP	GO:0048477	oogenesis	9/891	49/10468	0.0209111	0.971084	0.971084	ATM/BRCA2/KMT2B/DMC1/FOXL2/YTHDC2/GDF9/FOXO3/POMZP3	9
BP	GO:1903706	regulation of hemopoiesis	37/891	309/10468	0.0210614	0.971084	0.971084	PSMB4/HAX1/PSMA1/FADD/KLF13/MEIS2/B2M/TCF12/PSMB3/PSMD3/NME1/TNRC6C/AP3D1/KMT2B/ZFP36/ID2/ZFP36L2/CASP8/PSMF1/CEBPB/RUNX1/TLR9/BCL6/HES1/FNIP1/HSPA9/AGER/MAPK14/PRDM1/FOXO3/CDK6/CNOT4/NCAPG2/TMEM64/TRIB1/MYC/PSMD5	37
BP	GO:0048285	organelle fission	40/891	339/10468	0.0210871	0.971084	0.971084	GPR3/RCC1/CDC14A/NEK2/SMC3/CDKN1C/ATM/AAAS/BRCA2/RAD51/NUSAP1/ERCC4/LCMT1/CDT1/SPAG5/RAD51D/CDC6/CHMP6/SPIRE1/SEH1L/ANAPC1/HIRA/RANBP1/DMC1/MEI1/CLASP2/STAG1/SMC4/NCAPG/ANAPC4/PDS5A/CENPC/MND1/BOD1/UBR2/PHIP/PINX1/FBXO43/CDC26/GOLGA2	40
BP	GO:0046916	cellular transition metal ion homeostasis	12/891	74/10468	0.021599	0.984608	0.984608	NCOA4/ISCU/NUBP1/AP3D1/CYBRD1/FBXL5/SRI/CUL1/MYC/ACO1/LCN2/ATP7A	12
BP	GO:0006270	DNA replication initiation	7/891	34/10468	0.0222351	0.991216	0.991216	CDT1/CDC6/WDR18/CDC45/WRNIP1/PRIM2/NBN	7
BP	GO:0045930	negative regulation of mitotic cell cycle	32/891	261/10468	0.0225606	0.991216	0.991216	CDC14A/PSMB4/PSMA1/RAD9A/CCND1/DDIAS/ATM/MDM2/BTG1/RAD9B/ZWILCH/LCMT1/BRD7/RBL2/CDT1/RPL26/PSMB3/PSMD3/CDC6/ZFP36L2/PSMF1/BTG3/BCL6/JADE1/YTHDC2/CDK6/CNOT4/CUL1/PINX1/CNOT7/NBN/PSMD5	32
BP	GO:0006312	mitotic recombination	5/891	20/10468	0.0232843	0.991216	0.991216	BRCA2/TEP1/RAD51/ERCC4/DMC1	5
BP	GO:0006851	mitochondrial calcium ion transmembrane transport	5/891	20/10468	0.0232843	0.991216	0.991216	MCU/SPG7/PHB/AFG3L2/PARL	5
BP	GO:1904037	positive regulation of epithelial cell apoptotic process	5/891	20/10468	0.0232843	0.991216	0.991216	SORT1/ARRB2/FOXO3/IL6/JAK2	5
BP	GO:0000070	mitotic sister chromatid segregation	19/891	138/10468	0.0245689	0.991216	0.991216	NEK2/ATM/NUSAP1/LCMT1/CDT1/SPAG5/CDC6/CHMP6/SEH1L/ANAPC1/HIRA/SMC4/NCAPG/ANAPC4/PDS5A/CENPC/BOD1/PINX1/CDC26	19
BP	GO:0034101	erythrocyte homeostasis	15/891	102/10468	0.0253456	0.991216	0.991216	KLF13/B2M/ZFP36/ID2/EPAS1/SLC25A38/BCL6/HSPA9/MAPK14/FOXO3/CDK6/HIPK2/NCAPG2/JAK2/PTBP3	15
BP	GO:0002702	positive regulation of production of molecular mediator of immune response	10/891	59/10468	0.0259775	0.991216	0.991216	BCL10/XCL1/B2M/GPRC5B/ATAD5/IL18R1/TLR9/MAPK14/IL6/PAXIP1	10
BP	GO:0042035	regulation of cytokine biosynthetic process	10/891	59/10468	0.0259775	0.991216	0.991216	BCL10/MAP2K3/ZFP36/TRIB2/CEBPB/TLR9/LTB/AGER/IL6/JAK2	10
BP	GO:0007059	chromosome segregation	32/891	264/10468	0.0260706	0.991216	0.991216	RCC1/SFPQ/NEK2/SMC3/ATM/OIP5/NUSAP1/ERCC4/LCMT1/CDT1/SPAG5/CDC6/TLK2/AXIN2/CHMP6/SEH1L/ANAPC1/TLK1/HJURP/HIRA/DMC1/MEI1/STAG1/SMC4/NCAPG/ANAPC4/PDS5A/CENPC/NR3C1/BOD1/PINX1/CDC26	32
BP	GO:0002726	positive regulation of T cell cytokine production	4/891	14/10468	0.0261346	0.991216	0.991216	XCL1/B2M/IL18R1/IL6	4
BP	GO:0006750	glutathione biosynthetic process	4/891	14/10468	0.0261346	0.991216	0.991216	CNDP2/GGT7/SLC7A11/MGST2	4
BP	GO:0031958	corticosteroid receptor signaling pathway	4/891	14/10468	0.0261346	0.991216	0.991216	NEDD4/PHB/NR3C1/JAK2	4
BP	GO:0042219	cellular modified amino acid catabolic process	4/891	14/10468	0.0261346	0.991216	0.991216	ALDH4A1/MTHFS/AHCY/GGT7	4
BP	GO:0090110	cargo loading into COPII-coated vesicle	4/891	14/10468	0.0261346	0.991216	0.991216	SEC23A/SEC31A/SEC24B/SEC24D	4
BP	GO:1901532	regulation of hematopoietic progenitor cell differentiation	12/891	76/10468	0.0261515	0.991216	0.991216	PSMB4/PSMA1/TCF12/PSMB3/PSMD3/PSMF1/RUNX1/HES1/FNIP1/HSPA9/CDK6/PSMD5	12
BP	GO:0044772	mitotic cell cycle phase transition	54/891	488/10468	0.0265673	0.991216	0.991216	RCC1/NASP/CDC7/CDC14A/PSMB4/NEK2/DTL/ITGB1/CDKN1C/PSMA1/CCND1/NPAT/ATM/ZPR1/CCND2/MDM2/PHLDA1/AJUBA/CCP110/LCMT1/BRD7/RBL2/CDT1/RPL26/CRLF3/ATAD5/PSMB3/PSMD3/CDC6/ID2/RRM2/ZFP36L2/ANAPC1/PSMF1/BACH1/CDC45/CLASP2/CEP70/HAUS3/ANAPC4/JADE1/LSM11/PRIM2/DBF4/CDK6/CNOT4/CUL1/PINX1/CNOT7/PCM1/NBN/MYC/CDC26/PSMD5	54
BP	GO:0071496	cellular response to external stimulus	29/891	235/10468	0.0267527	0.991216	0.991216	SESN2/RRAGC/BCL10/GBA/XPR1/GLUL/TLR5/FADD/SIK2/MDM2/MAP1LC3B2/MAP1LC3B/PIEZO1/PDK2/WIPI1/SEH1L/CASP8/FOXA2/PICK1/ATF4/NPRL2/FNIP1/CPEB4/BAK1/MAP3K5/NUDT1/NAMPT/TRIM24/LCN2	29
BP	GO:0036294	cellular response to decreased oxygen levels	21/891	158/10468	0.0267591	0.991216	0.991216	PSMB4/PSMA1/MDM2/AJUBA/PSMB3/PSMD3/EPAS1/PSMF1/BACH1/PICK1/ATF4/CPEB2/STC2/CPEB4/FOXO3/CITED2/NAMPT/HIPK2/MYC/PSMD5/ATP7A	21
BP	GO:1903707	negative regulation of hemopoiesis	13/891	85/10468	0.0268888	0.991216	0.991216	KLF13/MEIS2/NME1/ZFP36/ID2/RUNX1/BCL6/HES1/HSPA9/CDK6/NCAPG2/TRIB1/MYC	13
BP	GO:0045787	positive regulation of cell cycle	34/891	285/10468	0.0274836	0.991216	0.991216	SFPQ/CDC7/CDC14A/DTL/CCND1/ATM/CCND2/GLI1/MDM2/BRCA2/MEIS2/NUSAP1/RBL2/CDT1/RPL26/SPAG5/CRLF3/ATAD5/CDK5R1/CDC6/ID2/CDC45/RANBP1/HES1/ANAPC4/YTHDC2/LSM11/C6orf89/PHIP/CITED2/DBF4/CNOT4/CNOT7/CSPP1	34
BP	GO:0045599	negative regulation of fat cell differentiation	6/891	28/10468	0.0277777	0.991216	0.991216	SORT1/C1QL4/TRIB2/ZFP36L2/IL6/ZFPM2	6
BP	GO:0010970	transport along microtubule	19/891	140/10468	0.0280774	0.991216	0.991216	SFPQ/ARHGAP21/RAB21/IFT43/RHOT2/SPG7/IFT20/AP3D1/DYNLRB1/TRAK1/COPG1/TMEM108/IFT80/AP3S1/ICK/TTC26/PCM1/AP3M2/WDR34	19
BP	GO:0099111	microtubule-based transport	19/891	140/10468	0.0280774	0.991216	0.991216	SFPQ/ARHGAP21/RAB21/IFT43/RHOT2/SPG7/IFT20/AP3D1/DYNLRB1/TRAK1/COPG1/TMEM108/IFT80/AP3S1/ICK/TTC26/PCM1/AP3M2/WDR34	19
BP	GO:0001774	microglial cell activation	5/891	21/10468	0.0284796	0.991216	0.991216	ATM/AGER/IL6/NAMPT/JAK2	5
BP	GO:0002269	leukocyte activation involved in inflammatory response	5/891	21/10468	0.0284796	0.991216	0.991216	ATM/AGER/IL6/NAMPT/JAK2	5
BP	GO:0006536	glutamate metabolic process	5/891	21/10468	0.0284796	0.991216	0.991216	ALDH4A1/GLUL/MTHFS/GAD1/SLC7A11	5
BP	GO:0032757	positive regulation of interleukin-8 production	5/891	21/10468	0.0284796	0.991216	0.991216	BCL10/CD58/TLR5/FADD/TLR9	5
BP	GO:0071103	DNA conformation change	27/891	217/10468	0.0289517	0.991216	0.991216	NASP/ITGB3BP/CENPL/GTF2H1/SART3/RAD51/OIP5/NUSAP1/CHD9/ASF1B/CENPO/XRCC5/HJURP/HIRA/CDC45/SMC4/NCAPG/CENPC/WRNIP1/SHPRH/HNRNPA2B1/MTERF1/GATAD1/NCAPG2/NBN/RECQL4/SET	27
BP	GO:1901136	carbohydrate derivative catabolic process	17/891	122/10468	0.0291036	0.991216	0.991216	FBXO2/FBXO44/GBA/NPL/EDEM3/NUDT4/UNG/GPC6/HDDC3/AHCY/EDEM1/IDUA/HINT1/GM2A/MGAT1/FUCA2/NUDT1	17
BP	GO:0002027	regulation of heart rate	7/891	36/10468	0.0297773	0.991216	0.991216	NOS1AP/MDM2/CALM1/TPM1/SPTBN4/EPAS1/SRI	7
BP	GO:0002763	positive regulation of myeloid leukocyte differentiation	7/891	36/10468	0.0297773	0.991216	0.991216	HAX1/FADD/ID2/CASP8/RUNX1/TMEM64/TRIB1	7
BP	GO:0031341	regulation of cell killing	8/891	44/10468	0.0302685	0.991216	0.991216	XCL1/CFH/FADD/B2M/ARRB2/AGER/STX7/ULBP2	8
BP	GO:0043627	response to estrogen	8/891	44/10468	0.0302685	0.991216	0.991216	GBA/SFR1/CCND1/MDM2/TGFB3/PELP1/CITED2/TRIM24	8
BP	GO:0051972	regulation of telomerase activity	8/891	44/10468	0.0302685	0.991216	0.991216	NEK2/NVL/PNKP/XRCC5/MAP3K4/HNRNPA2B1/PINX1/MYC	8
BP	GO:0031669	cellular response to nutrient levels	22/891	170/10468	0.0311005	0.991216	0.991216	SESN2/RRAGC/GBA/XPR1/GLUL/SIK2/MDM2/MAP1LC3B2/MAP1LC3B/PDK2/WIPI1/SEH1L/FOXA2/PICK1/ATF4/NPRL2/FNIP1/CPEB4/MAP3K5/NAMPT/TRIM24/LCN2	22
BP	GO:2000573	positive regulation of DNA biosynthetic process	10/891	61/10468	0.0320161	0.991216	0.991216	NEK2/NVL/ATM/ARRB2/PNKP/XRCC5/CCT8/MAP3K4/HNRNPA2B1/MYC	10
BP	GO:0002711	positive regulation of T cell mediated immunity	6/891	29/10468	0.0325862	0.991216	0.991216	XCL1/FADD/B2M/IL18R1/STX7/IL6	6
BP	GO:0008608	attachment of spindle microtubules to kinetochore	6/891	29/10468	0.0325862	0.991216	0.991216	NEK2/CDT1/SPAG5/SEH1L/CENPC/BOD1	6
BP	GO:0045740	positive regulation of DNA replication	6/891	29/10468	0.0325862	0.991216	0.991216	CDC7/GLI1/CDT1/TNFAIP1/ATAD5/DBF4	6
BP	GO:1904705	regulation of vascular smooth muscle cell proliferation	6/891	29/10468	0.0325862	0.991216	0.991216	MDM2/TGFB3/TPM1/MAP3K5/SOD2/JAK2	6
BP	GO:1990874	vascular smooth muscle cell proliferation	6/891	29/10468	0.0325862	0.991216	0.991216	MDM2/TGFB3/TPM1/MAP3K5/SOD2/JAK2	6
BP	GO:0006978	DNA damage response, signal transduction by p53 class mediator resulting in transcription of p21 class mediator	4/891	15/10468	0.0332979	0.991216	0.991216	KAT5/BRCA2/RPL26/HIPK2	4
BP	GO:0098813	nuclear chromosome segregation	26/891	210/10468	0.033376	0.991216	0.991216	SFPQ/NEK2/SMC3/ATM/NUSAP1/ERCC4/LCMT1/CDT1/SPAG5/CDC6/AXIN2/CHMP6/SEH1L/ANAPC1/HIRA/DMC1/MEI1/STAG1/SMC4/NCAPG/ANAPC4/PDS5A/CENPC/BOD1/PINX1/CDC26	26
BP	GO:0001510	RNA methylation	11/891	70/10468	0.0334184	0.991216	0.991216	TRMT13/RRNAD1/TRMT1L/ALKBH8/FBL/TRMT2A/RBM15B/NSUN3/TRMT10A/NSUN5/METTL2B	11
BP	GO:0009267	cellular response to starvation	16/891	115/10468	0.0339894	0.991216	0.991216	SESN2/RRAGC/GBA/XPR1/GLUL/SIK2/MAP1LC3B2/MAP1LC3B/WIPI1/SEH1L/PICK1/ATF4/NPRL2/FNIP1/CPEB4/MAP3K5	16
BP	GO:0042594	response to starvation	19/891	143/10468	0.0340297	0.991216	0.991216	SESN2/RRAGC/GBA/XPR1/GLUL/SIK2/MAP1LC3B2/MAP1LC3B/WIPI1/SEH1L/ZFP36/PICK1/ATF4/ADSL/NPRL2/FNIP1/CPEB4/FOXO3/MAP3K5	19
BP	GO:0034508	centromere complex assembly	7/891	37/10468	0.0341251	0.991216	0.991216	NASP/ITGB3BP/CENPL/OIP5/CENPO/HJURP/CENPC	7
BP	GO:0035735	intraciliary transport involved in cilium assembly	7/891	37/10468	0.0341251	0.991216	0.991216	IFT43/IFT20/DYNLRB1/IFT80/TTC26/PCM1/WDR34	7
BP	GO:1904358	positive regulation of telomere maintenance via telomere lengthening	7/891	37/10468	0.0341251	0.991216	0.991216	NEK2/ATM/PNKP/XRCC5/CCT8/MAP3K4/HNRNPA2B1	7
BP	GO:0010332	response to gamma radiation	8/891	45/10468	0.0341704	0.991216	0.991216	ATM/MDM2/BRCA2/RPL26/TLK2/XRCC5/BAK1/MYC	8
BP	GO:1901989	positive regulation of cell cycle phase transition	12/891	79/10468	0.034237	0.991216	0.991216	CDC7/DTL/CCND1/CCND2/GLI1/MDM2/CDT1/ATAD5/CDC6/CDC45/ANAPC4/LSM11	12
BP	GO:0030099	myeloid cell differentiation	33/891	280/10468	0.0343243	0.991216	0.991216	HAX1/EFNA4/PIP4K2A/CDKN1C/FADD/KLF13/MEIS2/B2M/DHRS7B/NME1/TNRC6C/KMT2B/ZFP36/ID2/EPAS1/CASP8/FARP2/CEBPB/RUNX1/SLC25A38/BCL6/HSPA9/MAPK14/FOXO3/CDK6/CNOT4/HIPK2/NCAPG2/TMEM64/TRIB1/MYC/JAK2/PTBP3	33
BP	GO:0021879	forebrain neuron differentiation	5/891	22/10468	0.034353	0.991216	0.991216	LHX5/B2M/HES1/UQCRQ/ATP7A	5
BP	GO:0043687	post-translational protein modification	32/891	270/10468	0.0343539	0.991216	0.991216	FBXO2/FBXO44/PSMB4/RAB13/DCAF6/QSOX1/DTL/PSMA1/SOCS2/ADAM10/MFGE8/ASB7/LCMT1/FBXL19/PSMB3/PSMD3/ASB16/LTBP1/EPAS1/TGOLN2/PSMF1/CRTAP/FBXL5/DCAF16/ATG12/STC2/FUCA2/IL6/CUL1/COPS5/PSMD5/ASB6	32
BP	GO:0002761	regulation of myeloid leukocyte differentiation	11/891	71/10468	0.0366287	0.991216	0.991216	HAX1/FADD/NME1/ID2/CASP8/CEBPB/RUNX1/CDK6/TMEM64/TRIB1/MYC	11
BP	GO:0033260	nuclear DNA replication	9/891	54/10468	0.0371119	0.991216	0.991216	CDC7/BRCA2/RAD51/CDT1/ATAD5/CDC45/BCL6/PRIM2/DBF4	9
BP	GO:0140053	mitochondrial gene expression	20/891	154/10468	0.0372967	0.991216	0.991216	WARS2/DARS2/MRPS16/MRPL49/YARS2/MRPS7/MRPL38/MRPL4/MRPS12/MRPS6/NSUN3/MRPS22/TRMT10A/MRPL22/MRPS10/FOXO3/MTERF1/MRPS33/MRPS28/TRUB2	20
BP	GO:0009308	amine metabolic process	13/891	89/10468	0.0375053	0.991216	0.991216	AZIN2/PSMB4/PSMA1/GDE1/SULT1A1/PSMB3/PSMD3/GDPD1/ODC1/PSMF1/SLC7A11/PSMD5/ATP7A	13
BP	GO:1900087	positive regulation of G1/S transition of mitotic cell cycle	6/891	30/10468	0.037904	0.991216	0.991216	CCND1/CCND2/MDM2/CDC6/CDC45/LSM11	6
BP	GO:0003281	ventricular septum development	8/891	46/10468	0.0383997	0.991216	0.991216	MDM2/DAND5/ID2/LTBP1/HES1/PRDM1/CITED2/ZFPM2	8
BP	GO:1901987	regulation of cell cycle phase transition	43/891	385/10468	0.038892	0.991216	0.991216	CDC7/CDC14A/PSMB4/NEK2/DTL/CDKN1C/PSMA1/CCND1/ATM/CCND2/GLI1/MDM2/CCP110/LCMT1/BRD7/RBL2/CDT1/RPL26/ATAD5/PSMB3/PSMD3/CDC6/ID2/ZFP36L2/ANAPC1/PSMF1/CDC45/CEP70/HAUS3/ANAPC4/JADE1/LSM11/DBF4/CDK6/CNOT4/CUL1/PAXIP1/PINX1/CNOT7/PCM1/NBN/CDC26/PSMD5	43
BP	GO:0035270	endocrine system development	10/891	63/10468	0.0389783	0.991216	0.991216	ARID5B/CDKN1C/GLI1/ALDH1A2/FOXA2/HES1/BAK1/CITED2/IL6/CDK6	10
BP	GO:0042089	cytokine biosynthetic process	10/891	63/10468	0.0389783	0.991216	0.991216	BCL10/MAP2K3/ZFP36/TRIB2/CEBPB/TLR9/LTB/AGER/IL6/JAK2	10
BP	GO:0042107	cytokine metabolic process	10/891	63/10468	0.0389783	0.991216	0.991216	BCL10/MAP2K3/ZFP36/TRIB2/CEBPB/TLR9/LTB/AGER/IL6/JAK2	10
BP	GO:0030705	cytoskeleton-dependent intracellular transport	20/891	155/10468	0.0395451	0.991216	0.991216	SFPQ/ARHGAP21/RAB21/IFT43/RHOT2/SPG7/IFT20/AP3D1/ACTN4/DYNLRB1/TRAK1/COPG1/TMEM108/IFT80/AP3S1/ICK/TTC26/PCM1/AP3M2/WDR34	20
BP	GO:0140013	meiotic nuclear division	15/891	108/10468	0.0397438	0.991216	0.991216	GPR3/ATM/BRCA2/RAD51/ERCC4/RAD51D/SPIRE1/DMC1/MEI1/SMC4/CENPC/MND1/UBR2/FBXO43/GOLGA2	15
BP	GO:0060218	hematopoietic stem cell differentiation	11/891	72/10468	0.0400491	0.991216	0.991216	PSMB4/PSMA1/TCF12/PSMB3/PSMD3/XRCC5/PSMF1/RUNX1/HSPA9/CDK6/PSMD5	11
BP	GO:0045786	negative regulation of cell cycle	53/891	490/10468	0.0401132	0.991216	0.991216	RRAGC/CDC7/CDC14A/PSMB4/NEK2/DTL/INTS7/SMC3/CDKN1C/PSMA1/TSG101/RAD9A/CCND1/DDIAS/ATM/MDM2/BTG1/RAD9B/RAD51/ZWILCH/NUBP1/LCMT1/BRD7/RBL2/CDT1/RPL26/CRLF3/CDK5R1/PCGF2/PSMB3/PSMD3/CDC6/ID2/RRM2/ZFP36L2/PSMF1/BTG3/CDC45/RYBP/BCL6/JADE1/YTHDC2/MAPK14/CBX3/CDK6/CNOT4/CUL1/PINX1/CNOT7/NBN/FBXO43/MYC/PSMD5	53
BP	GO:0007610	behavior	35/891	304/10468	0.0402943	0.991216	0.991216	LEPR/UBE2Q1/TRMT1L/ITGB1/TACR2/EIF4EBP2/CPEB3/FADD/AAAS/MMP17/MEIS2/B2M/CFAP20/APRT/ARRB2/IFT20/OLFM2/KMT2B/SPTBN4/ID2/GAD1/FOXA2/AHCY/DYNLRB1/CEBPB/GNB1L/SLC7A11/GM2A/AGER/ATXN1/HIPK2/PCM1/VDAC3/NCOA2/ATP7A	35
BP	GO:0031018	endocrine pancreas development	5/891	23/10468	0.0409227	0.991216	0.991216	FOXA2/HES1/BAK1/IL6/CDK6	5
BP	GO:0000076	DNA replication checkpoint	4/891	16/10468	0.0414923	0.991216	0.991216	RAD9A/CDT1/CDC6/CDC45	4
BP	GO:0001832	blastocyst growth	4/891	16/10468	0.0414923	0.991216	0.991216	ZPR1/BRCA2/NCAPG2/NBN	4
BP	GO:0006516	glycoprotein catabolic process	4/891	16/10468	0.0414923	0.991216	0.991216	FBXO2/FBXO44/EDEM3/EDEM1	4
BP	GO:0010661	positive regulation of muscle cell apoptotic process	4/891	16/10468	0.0414923	0.991216	0.991216	ATF4/E2F3/MAP3K5/SOD2	4
BP	GO:0019184	nonribosomal peptide biosynthetic process	4/891	16/10468	0.0414923	0.991216	0.991216	CNDP2/GGT7/SLC7A11/MGST2	4
BP	GO:0034035	purine ribonucleoside bisphosphate metabolic process	4/891	16/10468	0.0414923	0.991216	0.991216	HDDC3/SULT1A1/SLC26A1/SLC35B3	4
BP	GO:0034312	diol biosynthetic process	4/891	16/10468	0.0414923	0.991216	0.991216	GBA/PCBD1/PTS/PCBD2	4
BP	GO:0035024	negative regulation of Rho protein signal transduction	4/891	16/10468	0.0414923	0.991216	0.991216	ITGB1/TNFAIP1/BCL6/SCAI	4
BP	GO:0042772	DNA damage response, signal transduction resulting in transcription	4/891	16/10468	0.0414923	0.991216	0.991216	KAT5/BRCA2/RPL26/HIPK2	4
BP	GO:1903523	negative regulation of blood circulation	4/891	16/10468	0.0414923	0.991216	0.991216	SPTBN4/AGER/SRI/JAK2	4
BP	GO:0045931	positive regulation of mitotic cell cycle	16/891	118/10468	0.0417371	0.991216	0.991216	CDC7/DTL/CCND1/CCND2/MDM2/BRCA2/MEIS2/NUSAP1/CDT1/CDC6/CDC45/RANBP1/HES1/ANAPC4/LSM11/PHIP	16
BP	GO:0000723	telomere maintenance	18/891	137/10468	0.0421637	0.991216	0.991216	NEK2/ATM/BRCA2/TEP1/RAD51/ERCC4/RAD51D/PNKP/XRCC5/CCT8/GAR1/PRIM2/MAP3K4/HNRNPA2B1/PINX1/NBN/MYC/RECQL4	18
BP	GO:2001252	positive regulation of chromosome organization	19/891	147/10468	0.0433559	0.991216	0.991216	SFPQ/NEK2/ATM/SART3/BRD7/CDT1/KAT7/PNKP/XRCC5/CCT8/BCL6/ANAPC4/JARID2/C6orf89/MAP3K4/HNRNPA2B1/PAXIP1/NBN/PHF19	19
BP	GO:0007292	female gamete generation	12/891	82/10468	0.0439604	0.991216	0.991216	ATM/BRCA2/SPIRE1/KMT2B/NRIP1/DMC1/FOXL2/YTHDC2/GDF9/FOXO3/POMZP3/IMMP2L	12
BP	GO:0002709	regulation of T cell mediated immunity	7/891	39/10468	0.0440367	0.991216	0.991216	XCL1/FADD/B2M/IL18R1/AGER/STX7/IL6	7
BP	GO:0007131	reciprocal meiotic recombination	7/891	39/10468	0.0440367	0.991216	0.991216	ATM/RAD51/ERCC4/RAD51D/DMC1/MND1/UBR2	7
BP	GO:1902808	positive regulation of cell cycle G1/S phase transition	7/891	39/10468	0.0440367	0.991216	0.991216	CCND1/CCND2/GLI1/MDM2/CDC6/CDC45/LSM11	7
BP	GO:0090090	negative regulation of canonical Wnt signaling pathway	16/891	119/10468	0.0445802	0.991216	0.991216	PTPRU/PSMB4/PSMA1/PFDN5/GLI1/PSMB3/PSMD3/AXIN2/PSMF1/NPHP3/JADE1/CSNK1A1/MAPK14/FOXO3/TMEM64/PSMD5	16
BP	GO:0032200	telomere organization	18/891	138/10468	0.0448029	0.991216	0.991216	NEK2/ATM/BRCA2/TEP1/RAD51/ERCC4/RAD51D/PNKP/XRCC5/CCT8/GAR1/PRIM2/MAP3K4/HNRNPA2B1/PINX1/NBN/MYC/RECQL4	18
BP	GO:0045444	fat cell differentiation	18/891	138/10468	0.0448029	0.991216	0.991216	SORT1/ARID5B/CCND1/C1QL4/ZFP36/ID2/TRIB2/ZFP36L2/CEBPB/HES1/MAPK14/ARL4A/IL6/BBS9/CCDC71L/CEBPD/TMEM64/ZFPM2	18
BP	GO:0001503	ossification	26/891	216/10468	0.0448516	0.991216	0.991216	DHRS3/SORT1/EXT2/PTHLH/GLI1/TGFB3/CHSY1/PHB/AXIN2/FBL/ID2/TP53INP2/CEBPB/HIRA/PLXNB1/IGSF10/IFT80/FGF18/MAPK14/IL6/CDK6/ACHE/BCAP29/BMP1/CEBPD/TMEM64	26
BP	GO:0032543	mitochondrial translation	17/891	129/10468	0.0462125	0.991216	0.991216	WARS2/DARS2/MRPS16/MRPL49/YARS2/MRPS7/MRPL38/MRPL4/MRPS12/MRPS6/NSUN3/MRPS22/MRPL22/MRPS10/MRPS33/MRPS28/TRUB2	17
BP	GO:0006995	cellular response to nitrogen starvation	3/891	10/10468	0.046861	0.991216	0.991216	MAP1LC3B2/MAP1LC3B/NPRL2	3
BP	GO:0030852	regulation of granulocyte differentiation	3/891	10/10468	0.046861	0.991216	0.991216	HAX1/RUNX1/TRIB1	3
BP	GO:0043562	cellular response to nitrogen levels	3/891	10/10468	0.046861	0.991216	0.991216	MAP1LC3B2/MAP1LC3B/NPRL2	3
BP	GO:1900120	regulation of receptor binding	3/891	10/10468	0.046861	0.991216	0.991216	PTPRF/B2M/PLCL1	3
BP	GO:1903894	regulation of IRE1-mediated unfolded protein response	3/891	10/10468	0.046861	0.991216	0.991216	FICD/BAK1/COPS5	3
BP	GO:1904706	negative regulation of vascular smooth muscle cell proliferation	3/891	10/10468	0.046861	0.991216	0.991216	TGFB3/TPM1/SOD2	3
BP	GO:1902036	regulation of hematopoietic stem cell differentiation	10/891	65/10468	0.0469174	0.991216	0.991216	PSMB4/PSMA1/TCF12/PSMB3/PSMD3/PSMF1/RUNX1/HSPA9/CDK6/PSMD5	10
BP	GO:0006520	cellular amino acid metabolic process	29/891	247/10468	0.0469822	0.991216	0.991216	ALDH4A1/AZIN2/WARS2/PSMB4/DARS2/GLUL/PCBD1/PSMA1/PTS/YARS2/MTHFS/FAH/PSMB3/PSMD3/SARS2/ODC1/GAD1/MARS2/PSMF1/AHCY/ATF4/CRTAP/PPA2/SLC7A11/EEF1E1/AIMP2/OGDH/PSMD5/ATP7A	29
BP	GO:0006614	SRP-dependent cotranslational protein targeting to membrane	13/891	92/10468	0.0472156	0.991216	0.991216	RPS27/SRP9/RPL27A/RPL41/SRP14/RPL4/RPL26/RPL13A/RPS11/RPL3/BHLHE40-AS1/RPL30/RPL35	13
BP	GO:0006497	protein lipidation	11/891	74/10468	0.0475411	0.991216	0.991216	GBA/PIGC/GLUL/ZDHHC5/WIPI1/ZDHHC19/PIGZ/PIGY/ATG12/ZDHHC14/ZDHHC12	11
BP	GO:0048660	regulation of smooth muscle cell proliferation	11/891	74/10468	0.0475411	0.991216	0.991216	MDM2/TGFB3/TPM1/ID2/XRCC5/MAP3K5/SOD2/IL6/NAMPT/TRIB1/JAK2	11
BP	GO:0002700	regulation of production of molecular mediator of immune response	12/891	83/10468	0.0475881	0.991216	0.991216	BCL10/XCL1/TGFB3/B2M/GPRC5B/ATAD5/IL18R1/TLR9/BCL6/MAPK14/IL6/PAXIP1	12
BP	GO:0071453	cellular response to oxygen levels	21/891	168/10468	0.0476306	0.991216	0.991216	PSMB4/PSMA1/MDM2/AJUBA/PSMB3/PSMD3/EPAS1/PSMF1/BACH1/PICK1/ATF4/CPEB2/STC2/CPEB4/FOXO3/CITED2/NAMPT/HIPK2/MYC/PSMD5/ATP7A	21
BP	GO:0032206	positive regulation of telomere maintenance	8/891	48/10468	0.0478756	0.991216	0.991216	NEK2/ATM/PNKP/XRCC5/CCT8/MAP3K4/HNRNPA2B1/NBN	8
BP	GO:0001912	positive regulation of leukocyte mediated cytotoxicity	5/891	24/10468	0.0482009	0.991216	0.991216	XCL1/FADD/B2M/STX7/ULBP2	5
BP	GO:0007140	male meiotic nuclear division	5/891	24/10468	0.0482009	0.991216	0.991216	ATM/BRCA2/DMC1/MEI1/UBR2	5
BP	GO:0043516	regulation of DNA damage response, signal transduction by p53 class mediator	5/891	24/10468	0.0482009	0.991216	0.991216	ATM/MDM2/SPRED1/RPL26/EEF1E1	5
BP	GO:0050654	chondroitin sulfate proteoglycan metabolic process	5/891	24/10468	0.0482009	0.991216	0.991216	CSGALNACT2/CHSY1/PXYLP1/IDUA/EGFLAM	5
BP	GO:0031503	protein-containing complex localization	28/891	238/10468	0.0492039	0.991216	0.991216	SRRM1/SFPQ/NUP160/STX3/ATM/AAAS/GPC6/GPHN/IFT43/ADAM10/IFT20/SEH1L/AP3D1/DYNLRB1/U2AF1/POLDIP3/RBM15B/IFT80/SDAD1/ICK/STX7/HNRNPA2B1/NUP205/TTC26/PCM1/DNM1/WDR34/DLG3	28
BP	GO:0035825	homologous recombination	7/891	40/10468	0.0496202	0.991216	0.991216	ATM/RAD51/ERCC4/RAD51D/DMC1/MND1/UBR2	7
BP	GO:0072676	lymphocyte migration	7/891	40/10468	0.0496202	0.991216	0.991216	ARTN/XCL1/FADD/ADAM10/HSD3B7/STK10/ADTRP	7
BP	GO:0043618	regulation of transcription from RNA polymerase II promoter in response to stress	14/891	102/10468	0.0499092	0.991216	0.991216	SESN2/PSMB4/PSMA1/NEDD4/RBL2/PSMB3/PSMD3/EPAS1/PSMF1/CEBPB/BACH1/ATF4/CITED2/PSMD5	14
BP	GO:0006414	translational elongation	16/891	121/10468	0.0506741	0.991216	0.991216	SRP9/MRPS16/CPEB3/MRPL49/MRPS7/MRPL38/MRPL4/MRPS12/MRPS6/MRPS22/CPEB2/MRPL22/MRPS10/MRPS33/MRPS28/SECISBP2	16
BP	GO:0009065	glutamine family amino acid catabolic process	4/891	17/10468	0.0507218	0.991216	0.991216	ALDH4A1/GLUL/FAH/GAD1	4
BP	GO:0043496	regulation of protein homodimerization activity	4/891	17/10468	0.0507218	0.991216	0.991216	STPG1/AIDA/PCBD1/BAK1	4
BP	GO:0044319	wound healing, spreading of cells	4/891	17/10468	0.0507218	0.991216	0.991216	AJUBA/CLASP2/PDCD10/TOR1A	4
BP	GO:0045649	regulation of macrophage differentiation	4/891	17/10468	0.0507218	0.991216	0.991216	FADD/ID2/CASP8/TRIB1	4
BP	GO:0090505	epiboly involved in wound healing	4/891	17/10468	0.0507218	0.991216	0.991216	AJUBA/CLASP2/PDCD10/TOR1A	4
BP	GO:0003279	cardiac septum development	10/891	66/10468	0.0512676	0.991216	0.991216	DHRS3/MDM2/DAND5/ID2/LTBP1/NPHP3/HES1/PRDM1/CITED2/ZFPM2	10
BP	GO:1901992	positive regulation of mitotic cell cycle phase transition	10/891	66/10468	0.0512676	0.991216	0.991216	CDC7/DTL/CCND1/CCND2/MDM2/CDT1/CDC6/CDC45/ANAPC4/LSM11	10
BP	GO:0002706	regulation of lymphocyte mediated immunity	12/891	84/10468	0.051416	0.991216	0.991216	XCL1/FADD/B2M/ARRB2/ATAD5/IL18R1/BCL6/AGER/STX7/ULBP2/IL6/PAXIP1	12
BP	GO:0051101	regulation of DNA binding	12/891	84/10468	0.051416	0.991216	0.991216	NEK2/ERCC4/CDT1/NME1/ID2/HJURP/HES1/AGER/SRI/HIPK2/PINX1/JAK2	12
BP	GO:0003231	cardiac ventricle development	11/891	75/10468	0.0516224	0.991216	0.991216	MDM2/TPM1/DAND5/ID2/LTBP1/TNNC1/HES1/PRDM1/CITED2/ZFPM2/TMEM65	11
BP	GO:0010833	telomere maintenance via telomere lengthening	11/891	75/10468	0.0516224	0.991216	0.991216	NEK2/ATM/RAD51/ERCC4/PNKP/XRCC5/CCT8/GAR1/MAP3K4/HNRNPA2B1/PINX1	11
BP	GO:0048659	smooth muscle cell proliferation	11/891	75/10468	0.0516224	0.991216	0.991216	MDM2/TGFB3/TPM1/ID2/XRCC5/MAP3K5/SOD2/IL6/NAMPT/TRIB1/JAK2	11
BP	GO:0009100	glycoprotein metabolic process	31/891	270/10468	0.0528108	0.991216	0.991216	FBXO2/FBXO44/MAN1A2/EDEM3/CSGALNACT2/EXT2/ALG9/DPAGT1/OS9/PHLDA1/GNPTAB/FUT8/CHSY1/HS3ST3A1/MGAT5B/MCFD2/B3GNT2/GALNT5/SDF2L1/EDEM1/TRAK1/PXYLP1/ST6GAL1/IDUA/EGFLAM/GALNT10/MGAT1/MAN1A1/DPY19L1/GOLGA2/ATP7A	31
BP	GO:0042073	intraciliary transport	8/891	49/10468	0.053137	0.991216	0.991216	IFT43/IFT20/DYNLRB1/IFT80/ICK/TTC26/PCM1/WDR34	8
BP	GO:0051054	positive regulation of DNA metabolic process	22/891	180/10468	0.0533861	0.991216	0.991216	EYA3/CDC7/NEK2/NVL/ATM/GLI1/RAD51/CDT1/ARRB2/TNFAIP1/ATAD5/SPIRE1/PNKP/XRCC5/CCT8/MAP3K4/IL6/HNRNPA2B1/DBF4/PAXIP1/NBN/MYC	22
BP	GO:1901990	regulation of mitotic cell cycle phase transition	40/891	363/10468	0.0536536	0.991216	0.991216	CDC7/CDC14A/PSMB4/NEK2/DTL/CDKN1C/PSMA1/CCND1/ATM/CCND2/MDM2/CCP110/LCMT1/BRD7/RBL2/CDT1/RPL26/ATAD5/PSMB3/PSMD3/CDC6/ID2/ZFP36L2/ANAPC1/PSMF1/CDC45/CEP70/HAUS3/ANAPC4/JADE1/LSM11/CDK6/CNOT4/CUL1/PINX1/CNOT7/PCM1/NBN/CDC26/PSMD5	40
BP	GO:0031668	cellular response to extracellular stimulus	23/891	190/10468	0.0537055	0.991216	0.991216	SESN2/RRAGC/GBA/XPR1/GLUL/SIK2/MDM2/MAP1LC3B2/MAP1LC3B/PDK2/WIPI1/SEH1L/FOXA2/PICK1/ATF4/NPRL2/FNIP1/CPEB4/MAP3K5/NUDT1/NAMPT/TRIM24/LCN2	23
BP	GO:1904356	regulation of telomere maintenance via telomere lengthening	9/891	58/10468	0.0550569	0.991216	0.991216	NEK2/ATM/ERCC4/PNKP/XRCC5/CCT8/MAP3K4/HNRNPA2B1/PINX1	9
BP	GO:0044106	cellular amine metabolic process	12/891	85/10468	0.0554479	0.991216	0.991216	AZIN2/PSMB4/PSMA1/GDE1/PSMB3/PSMD3/GDPD1/ODC1/PSMF1/SLC7A11/PSMD5/ATP7A	12
BP	GO:0070125	mitochondrial translational elongation	12/891	85/10468	0.0554479	0.991216	0.991216	MRPS16/MRPL49/MRPS7/MRPL38/MRPL4/MRPS12/MRPS6/MRPS22/MRPL22/MRPS10/MRPS33/MRPS28	12
BP	GO:0017015	regulation of transforming growth factor beta receptor signaling pathway	11/891	76/10468	0.0559329	0.991216	0.991216	BAMBI/CDKN1C/BCL9L/TGFB3/RNF111/MTMR4/DAND5/EID2/LTBP1/CITED2/HIPK2	11
BP	GO:0032006	regulation of TOR signaling	11/891	76/10468	0.0559329	0.991216	0.991216	SESN2/RRAGC/GBA/ATM/SIK2/SEH1L/AKT1S1/NPRL2/FNIP1/UBR2/EPM2A	11
BP	GO:0032204	regulation of telomere maintenance	11/891	76/10468	0.0559329	0.991216	0.991216	NEK2/ATM/ERCC4/PNKP/XRCC5/CCT8/MAP3K4/HNRNPA2B1/PINX1/NBN/MYC	11
BP	GO:0018345	protein palmitoylation	5/891	25/10468	0.0561939	0.991216	0.991216	GLUL/ZDHHC5/ZDHHC19/ZDHHC14/ZDHHC12	5
BP	GO:0061900	glial cell activation	5/891	25/10468	0.0561939	0.991216	0.991216	ATM/AGER/IL6/NAMPT/JAK2	5
BP	GO:0070741	response to interleukin-6	5/891	25/10468	0.0561939	0.991216	0.991216	SELPLG/PHB/FOXA2/IL6/JAK2	5
BP	GO:0071480	cellular response to gamma radiation	5/891	25/10468	0.0561939	0.991216	0.991216	ATM/MDM2/RPL26/TLK2/XRCC5	5
BP	GO:0051705	multi-organism behavior	6/891	33/10468	0.0570296	0.991216	0.991216	UBE2Q1/EIF4EBP2/GAD1/GNB1L/ATXN1/PCM1	6
BP	GO:0097120	receptor localization to synapse	6/891	33/10468	0.0570296	0.991216	0.991216	STX3/GPC6/GPHN/ADAM10/STX7/DLG3	6
BP	GO:0051188	cofactor biosynthetic process	30/891	262/10468	0.0577009	0.991216	0.991216	UROD/MPC2/HKDC1/PCBD1/NUP160/PTS/AAAS/GPHN/ADPGK/MTHFS/PDPR/PDK2/RSAD1/SEH1L/CNDP2/GGT7/ACSS2/SLC25A1/SLC25A38/CPOX/COQ2/SLC7A11/MGST2/ACSL6/PCBD2/OGDH/NAMPT/NUP205/COQ4/SLC2A6	30
BP	GO:0001736	establishment of planar polarity	13/891	95/10468	0.058542	0.991216	0.991216	PSMB4/PSMA1/GPC6/ARRB2/IFT20/PSMB3/PSMD3/AP2S1/PSMF1/NPHP3/SEC24B/PSMD5/DLG3	13
BP	GO:0007164	establishment of tissue polarity	13/891	95/10468	0.058542	0.991216	0.991216	PSMB4/PSMA1/GPC6/ARRB2/IFT20/PSMB3/PSMD3/AP2S1/PSMF1/NPHP3/SEC24B/PSMD5/DLG3	13
BP	GO:0070126	mitochondrial translational termination	12/891	86/10468	0.059687	0.991216	0.991216	MRPS16/MRPL49/MRPS7/MRPL38/MRPL4/MRPS12/MRPS6/MRPS22/MRPL22/MRPS10/MRPS33/MRPS28	12
BP	GO:0035743	CD4-positive, alpha-beta T cell cytokine production	3/891	11/10468	0.060467	0.991216	0.991216	XCL1/IL18R1/IL6	3
BP	GO:0042762	regulation of sulfur metabolic process	3/891	11/10468	0.060467	0.991216	0.991216	PDPR/PDK2/SLC7A11	3
BP	GO:0050926	regulation of positive chemotaxis	3/891	11/10468	0.060467	0.991216	0.991216	ARTN/CCR4/AGER	3
BP	GO:0050927	positive regulation of positive chemotaxis	3/891	11/10468	0.060467	0.991216	0.991216	ARTN/CCR4/AGER	3
BP	GO:0060977	coronary vasculature morphogenesis	3/891	11/10468	0.060467	0.991216	0.991216	ARID2/SPRED1/SEC24B	3
BP	GO:1904738	vascular associated smooth muscle cell migration	3/891	11/10468	0.060467	0.991216	0.991216	MDM2/TPM1/ATP7A	3
BP	GO:1904752	regulation of vascular associated smooth muscle cell migration	3/891	11/10468	0.060467	0.991216	0.991216	MDM2/TPM1/ATP7A	3
BP	GO:1905939	regulation of gonad development	3/891	11/10468	0.060467	0.991216	0.991216	GDF9/CITED2/ZFPM2	3
BP	GO:2000105	positive regulation of DNA-dependent DNA replication	3/891	11/10468	0.060467	0.991216	0.991216	CDC7/CDT1/DBF4	3
BP	GO:0042158	lipoprotein biosynthetic process	11/891	77/10468	0.0604761	0.991216	0.991216	GBA/PIGC/GLUL/ZDHHC5/WIPI1/ZDHHC19/PIGZ/PIGY/ATG12/ZDHHC14/ZDHHC12	11
BP	GO:0032986	protein-DNA complex disassembly	4/891	18/10468	0.0609778	0.991216	0.991216	ARID2/SMARCC2/MYC/SET	4
BP	GO:0034311	diol metabolic process	4/891	18/10468	0.0609778	0.991216	0.991216	GBA/PCBD1/PTS/PCBD2	4
BP	GO:0046931	pore complex assembly	4/891	18/10468	0.0609778	0.991216	0.991216	AHCTF1/ADAM10/CCT8/NUP205	4
BP	GO:0090504	epiboly	4/891	18/10468	0.0609778	0.991216	0.991216	AJUBA/CLASP2/PDCD10/TOR1A	4
BP	GO:1904645	response to amyloid-beta	4/891	18/10468	0.0609778	0.991216	0.991216	AGER/FOXO3/NAMPT/DNM1	4
BP	GO:0034394	protein localization to cell surface	7/891	42/10468	0.0620776	0.991216	0.991216	PTPRU/LEPROT/LRIG2/STX3/GGA3/GOPC/TOR1A	7
BP	GO:0006613	cotranslational protein targeting to membrane	13/891	96/10468	0.0626916	0.991216	0.991216	RPS27/SRP9/RPL27A/RPL41/SRP14/RPL4/RPL26/RPL13A/RPS11/RPL3/BHLHE40-AS1/RPL30/RPL35	13
BP	GO:0030324	lung development	13/891	96/10468	0.0626916	0.991216	0.991216	MAN1A2/GLI1/TGFB3/ALDH1A2/EPAS1/NPHP3/HES1/SEC24B/SLC7A11/FGF18/AIMP2/ZFPM2/ATP7A	13
BP	GO:0071560	cellular response to transforming growth factor beta stimulus	19/891	154/10468	0.0638909	0.991216	0.991216	XCL1/BAMBI/CDKN1C/BCL9L/FUT8/TGFB3/RNF111/ARRB2/MTMR4/DAND5/PDCD5/EID2/LTBP1/ZFP36L2/GDF9/NR3C1/CITED2/HIPK2/FNTA	19
BP	GO:1902750	negative regulation of cell cycle G2/M phase transition	12/891	87/10468	0.0641363	0.991216	0.991216	PSMB4/DTL/PSMA1/ATM/PSMB3/PSMD3/CDC6/PSMF1/CUL1/PINX1/NBN/PSMD5	12
BP	GO:0051321	meiotic cell cycle	20/891	164/10468	0.0644057	0.991216	0.991216	PDIK1L/GPR3/NEK2/SMC3/ATM/BRCA2/RAD51/ERCC4/RAD51D/SPIRE1/DMC1/MEI1/SMC4/CENPC/MND1/YTHDC2/UBR2/NBN/FBXO43/GOLGA2	20
BP	GO:0032212	positive regulation of telomere maintenance via telomerase	6/891	34/10468	0.0644856	0.991216	0.991216	NEK2/ATM/PNKP/XRCC5/CCT8/MAP3K4	6
BP	GO:0001649	osteoblast differentiation	16/891	125/10468	0.0645611	0.991216	0.991216	PTHLH/GLI1/PHB/AXIN2/FBL/ID2/TP53INP2/CEBPB/HIRA/IFT80/IL6/CDK6/ACHE/BCAP29/CEBPD/TMEM64	16
BP	GO:0034612	response to tumor necrosis factor	22/891	184/10468	0.0648974	0.991216	0.991216	CD58/PSMB4/GBA/XCL1/SGMS1/PSMA1/ADAM10/PSMB3/PSMD3/ACTN4/ZFP36/ZFP36L2/CASP8/PSMF1/YTHDC2/LTB/MAPK14/FOXO3/MAP3K5/JAK2/PSMD5/LCN2	22
BP	GO:0006040	amino sugar metabolic process	5/891	26/10468	0.064902	0.991216	0.991216	NPL/DPAGT1/GNPNAT1/ST6GAL1/MGAT1	5
BP	GO:0006517	protein deglycosylation	5/891	26/10468	0.064902	0.991216	0.991216	MAN1A2/EDEM3/OS9/EDEM1/MAN1A1	5
BP	GO:0010165	response to X-ray	5/891	26/10468	0.064902	0.991216	0.991216	CCND1/ATM/BRCA2/XRCC5/THBD	5
BP	GO:0022602	ovulation cycle process	5/891	26/10468	0.064902	0.991216	0.991216	TGFB3/ARRB2/NRIP1/GDF9/FOXO3	5
BP	GO:0035176	social behavior	5/891	26/10468	0.064902	0.991216	0.991216	EIF4EBP2/GAD1/GNB1L/ATXN1/PCM1	5
BP	GO:0051703	intraspecies interaction between organisms	5/891	26/10468	0.064902	0.991216	0.991216	EIF4EBP2/GAD1/GNB1L/ATXN1/PCM1	5
BP	GO:2000401	regulation of lymphocyte migration	5/891	26/10468	0.064902	0.991216	0.991216	XCL1/FADD/ADAM10/STK10/ADTRP	5
BP	GO:0010972	negative regulation of G2/M transition of mitotic cell cycle	11/891	78/10468	0.0652553	0.991216	0.991216	PSMB4/PSMA1/ATM/PSMB3/PSMD3/CDC6/PSMF1/CUL1/PINX1/NBN/PSMD5	11
BP	GO:1903844	regulation of cellular response to transforming growth factor beta stimulus	11/891	78/10468	0.0652553	0.991216	0.991216	BAMBI/CDKN1C/BCL9L/TGFB3/RNF111/MTMR4/DAND5/EID2/LTBP1/CITED2/HIPK2	11
BP	GO:0002367	cytokine production involved in immune response	9/891	60/10468	0.0658335	0.991216	0.991216	BCL10/XCL1/TGFB3/B2M/GPRC5B/IL18R1/BCL6/MAPK14/IL6	9
BP	GO:0002708	positive regulation of lymphocyte mediated immunity	9/891	60/10468	0.0658335	0.991216	0.991216	XCL1/FADD/B2M/ATAD5/IL18R1/STX7/ULBP2/IL6/PAXIP1	9
BP	GO:0000724	double-strand break repair via homologous recombination	15/891	116/10468	0.0669519	0.991216	0.991216	SFPQ/CDC7/SFR1/ATM/BRCA2/RAD51/ERCC4/RAD51D/CDC45/DMC1/POLN/REV3L/NBN/RECQL4/SWI5	15
BP	GO:0003205	cardiac chamber development	13/891	97/10468	0.0670325	0.991216	0.991216	DHRS3/MDM2/TPM1/DAND5/ID2/LTBP1/TNNC1/NPHP3/HES1/PRDM1/CITED2/ZFPM2/TMEM65	13
BP	GO:0006839	mitochondrial transport	24/891	205/10468	0.0677874	0.991216	0.991216	STPG1/LEPROT/HAX1/MPC2/MCU/TIMM8B/SLC25A15/RHOT2/SPG7/AFG3L2/TIMM21/TIMM44/PDCD5/SAE1/CASP8/SLC25A1/CHCHD4/SLC25A38/PARL/BAK1/TMEM14A/TOMM7/IMMP2L/YWHAZ	24
BP	GO:0043620	regulation of DNA-templated transcription in response to stress	14/891	107/10468	0.0693031	0.991216	0.991216	SESN2/PSMB4/PSMA1/NEDD4/RBL2/PSMB3/PSMD3/EPAS1/PSMF1/CEBPB/BACH1/ATF4/CITED2/PSMD5	14
BP	GO:0030178	negative regulation of Wnt signaling pathway	17/891	136/10468	0.0694892	0.991216	0.991216	PTPRU/PSMB4/PSMA1/PFDN5/GLI1/PSMB3/PSMD3/AXIN2/PSMF1/NPHP3/IFT80/JADE1/CSNK1A1/MAPK14/FOXO3/TMEM64/PSMD5	17
BP	GO:0072331	signal transduction by p53 class mediator	26/891	226/10468	0.0700268	0.991216	0.991216	SESN2/KAT5/RAD9A/ATM/MDM2/RAD9B/BRCA2/SPRED1/BRD7/RBL2/RPL26/ATAD5/CDK5R1/PDK2/SETD9/HINT1/TAF7/EEF1E1/MAPK14/FOXO3/CNOT4/TRIM24/HIPK2/PAXIP1/CNOT7/NBN	26
BP	GO:0030879	mammary gland development	11/891	79/10468	0.0702729	0.991216	0.991216	ELF3/CCND1/SOCS2/BRCA2/TGFB3/APRT/NME1/ID2/CEBPB/JAK2/ATP7A	11
BP	GO:0000725	recombinational repair	15/891	117/10468	0.0710586	0.991216	0.991216	SFPQ/CDC7/SFR1/ATM/BRCA2/RAD51/ERCC4/RAD51D/CDC45/DMC1/POLN/REV3L/NBN/RECQL4/SWI5	15
BP	GO:0006521	regulation of cellular amino acid metabolic process	8/891	52/10468	0.0710767	0.991216	0.991216	PSMB4/PSMA1/PSMB3/PSMD3/ODC1/PSMF1/SLC7A11/PSMD5	8
BP	GO:0006399	tRNA metabolic process	20/891	166/10468	0.0711358	0.991216	0.991216	TRMT13/WARS2/DARS2/TRMT1L/ALKBH8/YARS2/FAM98B/MTFMT/SARS2/MARS2/RPP14/NSUN3/TRMT10A/PPA2/RPP21/EEF1E1/GTF3C6/AIMP2/TYW1B/METTL2B	20
BP	GO:2001022	positive regulation of response to DNA damage stimulus	10/891	70/10468	0.0713084	0.991216	0.991216	EYA3/RAD9A/ATM/SPRED1/RPL26/SPIRE1/ANKLE1/EEF1E1/PAXIP1/MYC	10
BP	GO:0045639	positive regulation of myeloid cell differentiation	9/891	61/10468	0.0716865	0.991216	0.991216	HAX1/FADD/ID2/CASP8/RUNX1/MAPK14/FOXO3/TMEM64/TRIB1	9
BP	GO:0002724	regulation of T cell cytokine production	4/891	19/10468	0.0722404	0.991216	0.991216	XCL1/B2M/IL18R1/IL6	4
BP	GO:0006085	acetyl-CoA biosynthetic process	4/891	19/10468	0.0722404	0.991216	0.991216	MPC2/PDPR/PDK2/ACSS2	4
BP	GO:0033598	mammary gland epithelial cell proliferation	4/891	19/10468	0.0722404	0.991216	0.991216	CCND1/BRCA2/ID2/CEBPB	4
BP	GO:0044346	fibroblast apoptotic process	4/891	19/10468	0.0722404	0.991216	0.991216	BTG1/BAK1/STK17A/MYC	4
BP	GO:0060330	regulation of response to interferon-gamma	4/891	19/10468	0.0722404	0.991216	0.991216	NR1H2/PARP14/TXK/JAK2	4
BP	GO:0060334	regulation of interferon-gamma-mediated signaling pathway	4/891	19/10468	0.0722404	0.991216	0.991216	NR1H2/PARP14/TXK/JAK2	4
BP	GO:1901798	positive regulation of signal transduction by p53 class mediator	4/891	19/10468	0.0722404	0.991216	0.991216	ATM/SPRED1/RPL26/EEF1E1	4
BP	GO:0002440	production of molecular mediator of immune response	16/891	127/10468	0.0723873	0.991216	0.991216	BCL10/XCL1/ATM/UNG/TGFB3/B2M/GPRC5B/ATAD5/IL18R1/TLR9/BCL6/MAPK14/PMS2/IL6/PAXIP1/NBN	16
BP	GO:0034198	cellular response to amino acid starvation	6/891	35/10468	0.0724856	0.991216	0.991216	SESN2/RRAGC/SEH1L/ATF4/NPRL2/MAP3K5	6
BP	GO:1901988	negative regulation of cell cycle phase transition	24/891	207/10468	0.0739821	0.991216	0.991216	PSMB4/DTL/PSMA1/CCND1/ATM/MDM2/LCMT1/BRD7/RBL2/CDT1/RPL26/PSMB3/PSMD3/CDC6/ZFP36L2/PSMF1/JADE1/CDK6/CNOT4/CUL1/PINX1/CNOT7/NBN/PSMD5	24
BP	GO:0000289	nuclear-transcribed mRNA poly(A) tail shortening	5/891	27/10468	0.0743202	0.991216	0.991216	CPEB3/TNRC6C/ZFP36/CNOT4/CNOT7	5
BP	GO:0007632	visual behavior	5/891	27/10468	0.0743202	0.991216	0.991216	ITGB1/MEIS2/IFT20/DYNLRB1/SLC7A11	5
BP	GO:0051084	'de novo' posttranslational protein folding	5/891	27/10468	0.0743202	0.991216	0.991216	HSPA13/CHCHD4/HSPA9/TOR2A/TOR1A	5
BP	GO:0150076	neuroinflammatory response	5/891	27/10468	0.0743202	0.991216	0.991216	ATM/AGER/IL6/NAMPT/JAK2	5
BP	GO:1901991	negative regulation of mitotic cell cycle phase transition	23/891	197/10468	0.0743409	0.991216	0.991216	PSMB4/PSMA1/CCND1/ATM/MDM2/LCMT1/BRD7/RBL2/CDT1/RPL26/PSMB3/PSMD3/CDC6/ZFP36L2/PSMF1/JADE1/CDK6/CNOT4/CUL1/PINX1/CNOT7/NBN/PSMD5	23
BP	GO:0071559	response to transforming growth factor beta	19/891	157/10468	0.0744604	0.991216	0.991216	XCL1/BAMBI/CDKN1C/BCL9L/FUT8/TGFB3/RNF111/ARRB2/MTMR4/DAND5/PDCD5/EID2/LTBP1/ZFP36L2/GDF9/NR3C1/CITED2/HIPK2/FNTA	19
BP	GO:0002474	antigen processing and presentation of peptide antigen via MHC class I	11/891	80/10468	0.0755312	0.991216	0.991216	PSMB4/PSMA1/SEC23A/B2M/PSMB3/PSMD3/PSMF1/SEC31A/SEC24B/SEC24D/PSMD5	11
BP	GO:0001833	inner cell mass cell proliferation	3/891	12/10468	0.0756843	0.991216	0.991216	ZPR1/BRCA2/NCAPG2	3
BP	GO:0002719	negative regulation of cytokine production involved in immune response	3/891	12/10468	0.0756843	0.991216	0.991216	XCL1/TGFB3/BCL6	3
BP	GO:0007175	negative regulation of epidermal growth factor-activated receptor activity	3/891	12/10468	0.0756843	0.991216	0.991216	TSG101/CHMP6/ZGPAT	3
BP	GO:0008209	androgen metabolic process	3/891	12/10468	0.0756843	0.991216	0.991216	CYP17A1/HSD17B6/TIPARP	3
BP	GO:0009954	proximal/distal pattern formation	3/891	12/10468	0.0756843	0.991216	0.991216	GLI1/ALDH1A2/CHSY1	3
BP	GO:0034138	toll-like receptor 3 signaling pathway	3/891	12/10468	0.0756843	0.991216	0.991216	UNC93B1/FADD/CASP8	3
BP	GO:0043248	proteasome assembly	3/891	12/10468	0.0756843	0.991216	0.991216	PSMG1/PSMG4/PSMD5	3
BP	GO:0043649	dicarboxylic acid catabolic process	3/891	12/10468	0.0756843	0.991216	0.991216	GLUL/MTHFS/GAD1	3
BP	GO:0045822	negative regulation of heart contraction	3/891	12/10468	0.0756843	0.991216	0.991216	SPTBN4/SRI/JAK2	3
BP	GO:0060292	long-term synaptic depression	3/891	12/10468	0.0756843	0.991216	0.991216	SLC24A1/PICK1/AGER	3
BP	GO:1904262	negative regulation of TORC1 signaling	3/891	12/10468	0.0756843	0.991216	0.991216	SESN2/ATM/FNIP1	3
BP	GO:0030323	respiratory tube development	13/891	99/10468	0.0762964	0.991216	0.991216	MAN1A2/GLI1/TGFB3/ALDH1A2/EPAS1/NPHP3/HES1/SEC24B/SLC7A11/FGF18/AIMP2/ZFPM2/ATP7A	13
BP	GO:0000910	cytokinesis	16/891	128/10468	0.0765269	0.991216	0.991216	CDC14A/JTB/AHCTF1/ANXA11/BRCA2/CKAP2/CALM1/NUSAP1/CCP110/CDT1/CDC6/CHMP6/SPIRE1/KIF20A/EFHC1/CSPP1	16
BP	GO:0007127	meiosis I	10/891	71/10468	0.0769935	0.991216	0.991216	ATM/BRCA2/RAD51/ERCC4/RAD51D/DMC1/MEI1/CENPC/MND1/UBR2	10
BP	GO:0051783	regulation of nuclear division	18/891	148/10468	0.0779243	0.991216	0.991216	GPR3/RCC1/CDC14A/NEK2/SMC3/CDKN1C/ATM/NUSAP1/LCMT1/CDT1/CDC6/ANAPC1/RANBP1/STAG1/ANAPC4/PHIP/FBXO43/CDC26	18
BP	GO:0030488	tRNA methylation	6/891	36/10468	0.0810273	0.991216	0.991216	TRMT13/TRMT1L/ALKBH8/NSUN3/TRMT10A/METTL2B	6
BP	GO:0035722	interleukin-12-mediated signaling pathway	6/891	36/10468	0.0810273	0.991216	0.991216	CAPZA1/RAP1B/HSPA9/SOD2/HNRNPA2B1/JAK2	6
BP	GO:0042108	positive regulation of cytokine biosynthetic process	6/891	36/10468	0.0810273	0.991216	0.991216	BCL10/TLR9/LTB/AGER/IL6/JAK2	6
BP	GO:0045600	positive regulation of fat cell differentiation	6/891	36/10468	0.0810273	0.991216	0.991216	ZFP36/ID2/CEBPB/MAPK14/CCDC71L/TMEM64	6
BP	GO:0070317	negative regulation of G0 to G1 transition	6/891	36/10468	0.0810273	0.991216	0.991216	CDC7/RAD51/PCGF2/RRM2/RYBP/CBX3	6
BP	GO:0000956	nuclear-transcribed mRNA catabolic process	22/891	189/10468	0.0815699	0.991216	0.991216	MRTO4/RPS27/PRPF18/CPEB3/RPL27A/ATM/RPL41/RPL4/RPL26/TNRC6C/ZFP36/RPL13A/RPS11/ZFP36L2/RPL3/TTC37/LSM5/CNOT4/CNOT7/RPL30/SECISBP2/RPL35	22
BP	GO:0051301	cell division	49/891	472/10468	0.0827104	0.991216	0.991216	RCC1/ITGB3BP/CDC7/CDC14A/JTB/NEK2/AHCTF1/ANXA11/SMC3/TSG101/CCND1/CCND2/BRCA2/CKAP2/NEK9/TGFB3/CALM1/OIP5/NUSAP1/ZWILCH/CCP110/RBL2/CDT1/SPAG5/CDC6/CHMP6/SPIRE1/SEH1L/ZFP36L2/ANAPC1/CLASP2/STAG1/SMC4/HAUS3/NCAPG/ANAPC4/PDS5A/CENPC/KIF20A/NR3C1/CSNK1A1/BOD1/EFHC1/CDK6/NCAPG2/CSPP1/MYC/CDC26/GOLGA2	49
BP	GO:0032922	circadian regulation of gene expression	7/891	45/10468	0.0840368	0.991216	0.991216	RAI1/ID2/NRIP1/ATF4/BHLHE40/NAMPT/NCOA2	7
BP	GO:0071230	cellular response to amino acid stimulus	7/891	45/10468	0.0840368	0.991216	0.991216	SESN2/RRAGC/CPEB3/CEBPB/CPEB4/UBR2/ATP7A	7
BP	GO:1904035	regulation of epithelial cell apoptotic process	7/891	45/10468	0.0840368	0.991216	0.991216	SORT1/ARRB2/ZFP36/FOXO3/IL6/KRIT1/JAK2	7
BP	GO:0106106	cold-induced thermogenesis	12/891	91/10468	0.0840796	0.991216	0.991216	GPR3/LEPR/NR1H2/EPAS1/IL18R1/PLCL1/CEBPB/ATF4/ACHE/DECR1/JAK2/LCN2	12
BP	GO:0120161	regulation of cold-induced thermogenesis	12/891	91/10468	0.0840796	0.991216	0.991216	GPR3/LEPR/NR1H2/EPAS1/IL18R1/PLCL1/CEBPB/ATF4/ACHE/DECR1/JAK2/LCN2	12
BP	GO:2000736	regulation of stem cell differentiation	12/891	91/10468	0.0840796	0.991216	0.991216	PSMB4/PSMA1/TCF12/PSMB3/PSMD3/ZFP36L2/PSMF1/RUNX1/HES1/HSPA9/CDK6/PSMD5	12
BP	GO:0043044	ATP-dependent chromatin remodeling	9/891	63/10468	0.084331	0.991216	0.991216	NASP/ITGB3BP/VPS72/CENPL/SMARCC2/OIP5/CENPO/HJURP/CENPC	9
BP	GO:0007034	vacuolar transport	15/891	120/10468	0.0843643	0.991216	0.991216	LEPROT/SORT1/NCOA4/TSG101/GNPTAB/VPS36/VPS18/NEDD4/AKTIP/VPS53/CHMP6/EPG5/AP3D1/TRAK1/VPS37A	15
BP	GO:1903432	regulation of TORC1 signaling	5/891	28/10468	0.0844381	0.991216	0.991216	SESN2/RRAGC/ATM/SEH1L/FNIP1	5
BP	GO:0001783	B cell apoptotic process	4/891	20/10468	0.0844794	0.991216	0.991216	BCL10/BCL6/FNIP1/BAK1	4
BP	GO:0061082	myeloid leukocyte cytokine production	4/891	20/10468	0.0844794	0.991216	0.991216	BCL10/TGFB3/GPRC5B/BCL6	4
BP	GO:0031929	TOR signaling	12/891	92/10468	0.0896092	0.991216	0.991216	SESN2/RRAGC/GBA/EIF4EBP2/ATM/SIK2/SEH1L/AKT1S1/NPRL2/FNIP1/UBR2/EPM2A	12
BP	GO:0071356	cellular response to tumor necrosis factor	20/891	171/10468	0.09	0.991216	0.991216	CD58/PSMB4/GBA/XCL1/SGMS1/PSMA1/PSMB3/PSMD3/ACTN4/ZFP36/ZFP36L2/CASP8/PSMF1/LTB/MAPK14/FOXO3/MAP3K5/JAK2/PSMD5/LCN2	20
BP	GO:0045747	positive regulation of Notch signaling pathway	6/891	37/10468	0.0901051	0.991216	0.991216	ELF3/TSPAN14/MAML2/PDCD10/HES1/MAML3	6
BP	GO:0071349	cellular response to interleukin-12	6/891	37/10468	0.0901051	0.991216	0.991216	CAPZA1/RAP1B/HSPA9/SOD2/HNRNPA2B1/JAK2	6
BP	GO:1903214	regulation of protein targeting to mitochondrion	6/891	37/10468	0.0901051	0.991216	0.991216	LEPROT/HAX1/PDCD5/SAE1/PARL/TOMM7	6
BP	GO:0009416	response to light stimulus	24/891	212/10468	0.0911287	0.991216	0.991216	DTL/ITGB1/CCND1/MDM2/BRCA2/ERCC5/CALM1/MEIS2/NEDD4/SLC24A1/ERCC4/N4BP1/RBL2/RPL26/IFT20/ID2/DYNLRB1/ATF4/BHLHE40/SLC7A11/BAK1/MAP3K4/FNTA/MYC	24
BP	GO:0042157	lipoprotein metabolic process	13/891	102/10468	0.0916688	0.991216	0.991216	GBA/PIGC/GLUL/ZDHHC5/ATM/WIPI1/ZDHHC19/PIGZ/PIGY/MTTP/ATG12/ZDHHC14/ZDHHC12	13
BP	GO:0043502	regulation of muscle adaptation	8/891	55/10468	0.0922962	0.991216	0.991216	CAMK2G/MEF2A/MTMR4/TNNC1/JARID2/FOXO3/GTF2IRD2/GTF2IRD2B	8
BP	GO:0051149	positive regulation of muscle cell differentiation	8/891	55/10468	0.0922962	0.991216	0.991216	BNIP2/MEF2A/CDH15/ARRB2/OLFM2/EHD2/MAPK14/SOD2	8
BP	GO:1902882	regulation of response to oxidative stress	8/891	55/10468	0.0922962	0.991216	0.991216	SESN2/SFPQ/FUT8/GGT7/ATF4/SLC7A11/FOXO3/SOD2	8
BP	GO:0001779	natural killer cell differentiation	3/891	13/10468	0.0923943	0.991216	0.991216	TYRO3/ID2/PRDM1	3
BP	GO:0006086	acetyl-CoA biosynthetic process from pyruvate	3/891	13/10468	0.0923943	0.991216	0.991216	MPC2/PDPR/PDK2	3
BP	GO:0007530	sex determination	3/891	13/10468	0.0923943	0.991216	0.991216	FOXL2/CITED2/MAP3K4	3
BP	GO:0042226	interleukin-6 biosynthetic process	3/891	13/10468	0.0923943	0.991216	0.991216	BCL10/CEBPB/AGER	3
BP	GO:0042921	glucocorticoid receptor signaling pathway	3/891	13/10468	0.0923943	0.991216	0.991216	NEDD4/PHB/NR3C1	3
BP	GO:0061158	3'-UTR-mediated mRNA destabilization	3/891	13/10468	0.0923943	0.991216	0.991216	CPEB3/ZFP36/ZFP36L2	3
BP	GO:0070935	3'-UTR-mediated mRNA stabilization	3/891	13/10468	0.0923943	0.991216	0.991216	ZFP36/RBM38/MAPK14	3
BP	GO:1902570	protein localization to nucleolus	3/891	13/10468	0.0923943	0.991216	0.991216	GLUL/NVL/PINX1	3
BP	GO:2000406	positive regulation of T cell migration	3/891	13/10468	0.0923943	0.991216	0.991216	XCL1/FADD/ADAM10	3
BP	GO:0090175	regulation of establishment of planar polarity	11/891	83/10468	0.0927618	0.991216	0.991216	PSMB4/PSMA1/GPC6/ARRB2/PSMB3/PSMD3/AP2S1/PSMF1/NPHP3/SEC24B/PSMD5	11
BP	GO:1903046	meiotic cell cycle process	15/891	122/10468	0.0940667	0.991216	0.991216	GPR3/ATM/BRCA2/RAD51/ERCC4/RAD51D/SPIRE1/DMC1/MEI1/SMC4/CENPC/MND1/UBR2/FBXO43/GOLGA2	15
BP	GO:0061061	muscle structure development	39/891	370/10468	0.0945755	0.991216	0.991216	SORT1/IGSF8/ZBTB18/ITGB1/ARID5B/SYNPO2L/BCL9L/GLI1/BTG1/TCF12/BNIP2/TPM1/UNC45A/MEF2A/PRR14/CDH15/ARRB2/IFT20/AFG3L2/OLFM2/EID2/EHD2/EPAS1/FOXN2/RBM38/HIRA/TNNC1/FOXL2/HES1/MED28/JARID2/MAPK14/PRICKLE4/CD164/MAP3K5/SOD2/SRI/ACHE/ZFPM2	39
BP	GO:1902275	regulation of chromatin organization	17/891	142/10468	0.094852	0.991216	0.991216	ATM/SART3/BRD7/KAT7/TLK2/KMT2B/TLK1/HIRA/CDC45/BCL6/TAF7/JARID2/C6orf89/PAXIP1/UBR5/PHF19/SET	17
BP	GO:0002639	positive regulation of immunoglobulin production	5/891	29/10468	0.0952406	0.991216	0.991216	XCL1/ATAD5/TLR9/IL6/PAXIP1	5
BP	GO:0007595	lactation	5/891	29/10468	0.0952406	0.991216	0.991216	CCND1/SOCS2/APRT/NME1/ATP7A	5
BP	GO:0014910	regulation of smooth muscle cell migration	5/891	29/10468	0.0952406	0.991216	0.991216	MDM2/TPM1/PLXNA1/TRIB1/ATP7A	5
BP	GO:0031343	positive regulation of cell killing	5/891	29/10468	0.0952406	0.991216	0.991216	XCL1/FADD/B2M/STX7/ULBP2	5
BP	GO:0050805	negative regulation of synaptic transmission	5/891	29/10468	0.0952406	0.991216	0.991216	RAP1B/SLC24A1/PICK1/AGER/ACHE	5
BP	GO:0061462	protein localization to lysosome	5/891	29/10468	0.0952406	0.991216	0.991216	NCOA4/GNPTAB/NEDD4/GGA3/AP3D1	5
BP	GO:0071674	mononuclear cell migration	5/891	29/10468	0.0952406	0.991216	0.991216	NBL1/XCL1/AGER/MAPK14/IL6	5
BP	GO:0000209	protein polyubiquitination	29/891	265/10468	0.0956058	0.991216	0.991216	FBXO2/FBXO44/PSMB4/DTL/PSMA1/ZFP91/TPP2/NEDD4/RNF111/FBXL19/PSMB3/PSMD3/RMND5A/ANAPC1/PSMF1/FBXL5/ANAPC4/UBE2K/MYLIP/UBR2/UBE3D/SHPRH/ZNRF2/ANKIB1/CUL1/LONRF1/UBR5/CDC26/PSMD5	29
BP	GO:1990542	mitochondrial transmembrane transport	10/891	74/10468	0.0956922	0.991216	0.991216	MPC2/MCU/SLC25A15/AFG3L2/TIMM21/TIMM44/SLC25A1/CHCHD4/SLC25A38/TOMM7	10
BP	GO:0006605	protein targeting	38/891	360/10468	0.096359	0.991216	0.991216	LEPROT/RPS27/HAX1/SRP9/NCOA4/RPL27A/TIMM8B/RPL41/OS9/GNPTAB/SRP14/NEDD4/RPL4/LONP2/RPL26/CDK5R1/TIMM21/AP3D1/TIMM44/PDCD5/SAE1/RPL13A/RPS11/RPL3/BHLHE40-AS1/CHCHD4/TRAK1/PARL/ZDHHC19/AMACR/ZDHHC14/TOMM7/IMMP2L/VPS37A/RPL30/YWHAZ/RPL35/ZDHHC12	38
BP	GO:0033865	nucleoside bisphosphate metabolic process	13/891	103/10468	0.0971898	0.991216	0.991216	MPC2/FAR1/HDDC3/SULT1A1/PDPR/PDK2/ACSS2/SLC25A1/SLC26A1/LOC344967/ACSL6/SLC35B3/OGDH	13
BP	GO:0033875	ribonucleoside bisphosphate metabolic process	13/891	103/10468	0.0971898	0.991216	0.991216	MPC2/FAR1/HDDC3/SULT1A1/PDPR/PDK2/ACSS2/SLC25A1/SLC26A1/LOC344967/ACSL6/SLC35B3/OGDH	13
BP	GO:0034032	purine nucleoside bisphosphate metabolic process	13/891	103/10468	0.0971898	0.991216	0.991216	MPC2/FAR1/HDDC3/SULT1A1/PDPR/PDK2/ACSS2/SLC25A1/SLC26A1/LOC344967/ACSL6/SLC35B3/OGDH	13
BP	GO:0048872	homeostasis of number of cells	21/891	183/10468	0.097651	0.991216	0.991216	BCL10/FADD/KLF13/B2M/ZFP36/ID2/EPAS1/CCR4/SLC25A38/BCL6/SLC7A11/HSPA9/BAK1/MAPK14/FOXO3/IL6/CDK6/HIPK2/NCAPG2/JAK2/PTBP3	21
BP	GO:0002063	chondrocyte development	4/891	21/10468	0.0976559	0.991216	0.991216	PTHLH/CHSY1/AXIN2/FGF18	4
BP	GO:0030204	chondroitin sulfate metabolic process	4/891	21/10468	0.0976559	0.991216	0.991216	CSGALNACT2/CHSY1/IDUA/EGFLAM	4
BP	GO:0032735	positive regulation of interleukin-12 production	4/891	21/10468	0.0976559	0.991216	0.991216	TLR9/LTB/AGER/MAPK14	4
BP	GO:0043162	ubiquitin-dependent protein catabolic process via the multivesicular body sorting pathway	4/891	21/10468	0.0976559	0.991216	0.991216	TSG101/VPS36/NEDD4/VPS37A	4
BP	GO:0048662	negative regulation of smooth muscle cell proliferation	4/891	21/10468	0.0976559	0.991216	0.991216	TGFB3/TPM1/SOD2/TRIB1	4
BP	GO:0002381	immunoglobulin production involved in immunoglobulin mediated immune response	6/891	38/10468	0.0997109	0.991216	0.991216	XCL1/UNG/ATAD5/BCL6/PAXIP1/NBN	6
BP	GO:0014855	striated muscle cell proliferation	6/891	38/10468	0.0997109	0.991216	0.991216	ARID2/GLI1/JARID2/MAPK14/ZFPM2/JAK2	6
BP	GO:0016233	telomere capping	6/891	38/10468	0.0997109	0.991216	0.991216	NEK2/ATM/ERCC4/PNKP/MAP3K4/NBN	6
BP	GO:0042698	ovulation cycle	6/891	38/10468	0.0997109	0.991216	0.991216	TGFB3/TYRO3/ARRB2/NRIP1/GDF9/FOXO3	6
BP	GO:0070671	response to interleukin-12	6/891	38/10468	0.0997109	0.991216	0.991216	CAPZA1/RAP1B/HSPA9/SOD2/HNRNPA2B1/JAK2	6
BP	GO:1990928	response to amino acid starvation	6/891	38/10468	0.0997109	0.991216	0.991216	SESN2/RRAGC/SEH1L/ATF4/NPRL2/MAP3K5	6
BP	GO:0008333	endosome to lysosome transport	7/891	47/10468	0.100849	0.991216	0.991216	SORT1/TSG101/VPS18/AKTIP/EPG5/AP3D1/TRAK1	7
BP	GO:0061077	chaperone-mediated protein folding	7/891	47/10468	0.100849	0.991216	0.991216	UNC45A/PDCD5/HSPA13/CRTAP/HSPA9/TOR2A/TOR1A	7
BP	GO:0006302	double-strand break repair	22/891	194/10468	0.100885	0.991216	0.991216	EYA3/SFPQ/CDC7/SFR1/KAT5/ATM/BRCA2/RAD51/ERCC4/RAD51D/SPIRE1/XRCC5/CDC45/DMC1/POLN/DEK/REV3L/PAXIP1/NBN/UBR5/RECQL4/SWI5	22
BP	GO:0045047	protein targeting to ER	13/891	104/10468	0.10291	0.991216	0.991216	RPS27/SRP9/RPL27A/RPL41/SRP14/RPL4/RPL26/RPL13A/RPS11/RPL3/BHLHE40-AS1/RPL30/RPL35	13
BP	GO:0071214	cellular response to abiotic stimulus	26/891	236/10468	0.103639	0.991216	0.991216	BCL10/INTS7/TLR5/RAD9A/FADD/ATM/MDM2/RAD9B/CALM1/RAD51/NEDD4/ERCC4/N4BP1/RBL2/PIEZO1/RPL26/TLK2/CASP8/XRCC5/ATF4/BAK1/MAPK14/NAMPT/FNTA/MYC/SWI5	26
BP	GO:0104004	cellular response to environmental stimulus	26/891	236/10468	0.103639	0.991216	0.991216	BCL10/INTS7/TLR5/RAD9A/FADD/ATM/MDM2/RAD9B/CALM1/RAD51/NEDD4/ERCC4/N4BP1/RBL2/PIEZO1/RPL26/TLK2/CASP8/XRCC5/ATF4/BAK1/MAPK14/NAMPT/FNTA/MYC/SWI5	26
BP	GO:0090316	positive regulation of intracellular protein transport	15/891	124/10468	0.10444	0.991216	0.991216	EFCAB7/LEPROT/ZPR1/MDM2/CDK5R1/PDCD5/SAE1/EDEM1/PDCD10/ICE1/MAPK14/SLC35D3/TOMM7/PCM1/UBR5	15
BP	GO:1905037	autophagosome organization	11/891	85/10468	0.105465	0.991216	0.991216	GBA/PIP4K2A/ATG2A/MAP1LC3B2/MAP1LC3B/IFT20/WIPI1/ATG16L1/TP53INP2/NPRL2/ATG12	11
BP	GO:0048199	vesicle targeting, to, from or within Golgi	9/891	66/10468	0.105643	0.991216	0.991216	TMED2/SEC23A/GOSR1/WIPI1/MCFD2/SEC31A/SEC24B/SEC24D/GOLGA2	9
BP	GO:0050671	positive regulation of lymphocyte proliferation	9/891	66/10468	0.105643	0.991216	0.991216	XCL1/FADD/ATAD5/TLR9/BCL6/HES1/AGER/IL6/EFNB1	9
BP	GO:0050921	positive regulation of chemotaxis	9/891	66/10468	0.105643	0.991216	0.991216	ARTN/XCL1/STX3/ADAM10/CCR4/FGF18/AGER/MAPK14/IL6	9
BP	GO:0051303	establishment of chromosome localization	9/891	66/10468	0.105643	0.991216	0.991216	ATM/CDT1/SPAG5/CHMP6/SEH1L/MEI1/CENPC/BOD1/PINX1	9
BP	GO:0006576	cellular biogenic amine metabolic process	5/891	30/10468	0.106708	0.991216	0.991216	AZIN2/GDE1/GDPD1/ODC1/ATP7A	5
BP	GO:0021872	forebrain generation of neurons	5/891	30/10468	0.106708	0.991216	0.991216	LHX5/B2M/HES1/UQCRQ/ATP7A	5
BP	GO:0060038	cardiac muscle cell proliferation	5/891	30/10468	0.106708	0.991216	0.991216	ARID2/GLI1/JARID2/MAPK14/ZFPM2	5
BP	GO:1904591	positive regulation of protein import	5/891	30/10468	0.106708	0.991216	0.991216	EFCAB7/ZPR1/PDCD5/MAPK14/UBR5	5
BP	GO:0071695	anatomical structure maturation	12/891	95/10468	0.10751	0.991216	0.991216	CDKN1C/BRCA2/ALDH1A2/CDK5R1/SPTBN4/FARP2/TRPC4AP/PICK1/DMC1/PLXNB1/FOXO3/PTBP3	12
BP	GO:1990845	adaptive thermogenesis	12/891	95/10468	0.10751	0.991216	0.991216	GPR3/LEPR/NR1H2/EPAS1/IL18R1/PLCL1/CEBPB/ATF4/ACHE/DECR1/JAK2/LCN2	12
BP	GO:2001020	regulation of response to DNA damage stimulus	19/891	165/10468	0.108148	0.991216	0.991216	EYA3/RAD9A/DDIAS/ATM/MDM2/SPRED1/RAD51/ERCC4/RPL26/ATAD5/AXIN2/SPIRE1/ANKLE1/WRNIP1/EEF1E1/DEK/PAXIP1/UBR5/MYC	19
BP	GO:0036473	cell death in response to oxidative stress	8/891	57/10468	0.108254	0.991216	0.991216	SFPQ/ATF4/PDCD10/SLC7A11/FOXO3/MAP3K5/SOD2/JAK2	8
BP	GO:0061097	regulation of protein tyrosine kinase activity	8/891	57/10468	0.108254	0.991216	0.991216	TSG101/GPRC5B/MVP/CHMP6/ZGPAT/NCAPG2/DLG3/RAP2C	8
BP	GO:0001659	temperature homeostasis	13/891	105/10468	0.108828	0.991216	0.991216	GPR3/LEPR/PTGER3/NR1H2/EPAS1/IL18R1/PLCL1/CEBPB/ATF4/ACHE/DECR1/JAK2/LCN2	13
BP	GO:0061982	meiosis I cell cycle process	10/891	76/10468	0.109524	0.991216	0.991216	ATM/BRCA2/RAD51/ERCC4/RAD51D/DMC1/MEI1/CENPC/MND1/UBR2	10
BP	GO:0030101	natural killer cell activation	6/891	39/10468	0.109833	0.991216	0.991216	TYRO3/ID2/IL18R1/CASP8/PRDM1/ULBP2	6
BP	GO:0060411	cardiac septum morphogenesis	6/891	39/10468	0.109833	0.991216	0.991216	DHRS3/MDM2/ID2/HES1/CITED2/ZFPM2	6
BP	GO:0070316	regulation of G0 to G1 transition	6/891	39/10468	0.109833	0.991216	0.991216	CDC7/RAD51/PCGF2/RRM2/RYBP/CBX3	6
BP	GO:0072666	establishment of protein localization to vacuole	6/891	39/10468	0.109833	0.991216	0.991216	NCOA4/GNPTAB/VPS36/NEDD4/AP3D1/VPS37A	6
BP	GO:0002244	hematopoietic progenitor cell differentiation	15/891	125/10468	0.109878	0.991216	0.991216	PSMB4/PSMA1/TCF12/PSMB3/PSMD3/SIPA1L3/XRCC5/PSMF1/RUNX1/HES1/FNIP1/HSPA9/CDK6/CEBPD/PSMD5	15
BP	GO:0002902	regulation of B cell apoptotic process	3/891	14/10468	0.110465	0.991216	0.991216	BCL10/BCL6/FNIP1	3
BP	GO:0006047	UDP-N-acetylglucosamine metabolic process	3/891	14/10468	0.110465	0.991216	0.991216	DPAGT1/GNPNAT1/MGAT1	3
BP	GO:0006999	nuclear pore organization	3/891	14/10468	0.110465	0.991216	0.991216	AHCTF1/SEH1L/NUP205	3
BP	GO:0007628	adult walking behavior	3/891	14/10468	0.110465	0.991216	0.991216	ARRB2/SPTBN4/HIPK2	3
BP	GO:0021983	pituitary gland development	3/891	14/10468	0.110465	0.991216	0.991216	GLI1/ALDH1A2/HES1	3
BP	GO:0030325	adrenal gland development	3/891	14/10468	0.110465	0.991216	0.991216	ARID5B/CDKN1C/CITED2	3
BP	GO:0032703	negative regulation of interleukin-2 production	3/891	14/10468	0.110465	0.991216	0.991216	XCL1/KAT5/ZFP36	3
BP	GO:0048308	organelle inheritance	3/891	14/10468	0.110465	0.991216	0.991216	PDCD10/YWHAZ/GOLGA2	3
BP	GO:0048313	Golgi inheritance	3/891	14/10468	0.110465	0.991216	0.991216	PDCD10/YWHAZ/GOLGA2	3
BP	GO:0085029	extracellular matrix assembly	3/891	14/10468	0.110465	0.991216	0.991216	QSOX1/TNXB/ATP7A	3
BP	GO:1902683	regulation of receptor localization to synapse	3/891	14/10468	0.110465	0.991216	0.991216	GPC6/ADAM10/STX7	3
BP	GO:2000403	positive regulation of lymphocyte migration	3/891	14/10468	0.110465	0.991216	0.991216	XCL1/FADD/ADAM10	3
BP	GO:0048545	response to steroid hormone	26/891	238/10468	0.111429	0.991216	0.991216	PTPRU/GBA/NCOA4/KAT5/CCND1/MDM2/ESR2/TGFB3/NEDD4/ARRB2/PHB/CATSPERG/ZFP36/NR1H2/ZFP36L2/NRIP1/RUNX1/TAF7/NR3C1/ADTRP/FOXO3/IL6/NCOA2/UBR5/JAK2/NR6A1	26
BP	GO:0008334	histone mRNA metabolic process	4/891	22/10468	0.111723	0.991216	0.991216	SNRPE/ATM/SNRPG/LSM11	4
BP	GO:0030511	positive regulation of transforming growth factor beta receptor signaling pathway	4/891	22/10468	0.111723	0.991216	0.991216	CDKN1C/RNF111/CITED2/HIPK2	4
BP	GO:0031167	rRNA methylation	4/891	22/10468	0.111723	0.991216	0.991216	RRNAD1/FBL/NSUN3/NSUN5	4
BP	GO:1903846	positive regulation of cellular response to transforming growth factor beta stimulus	4/891	22/10468	0.111723	0.991216	0.991216	CDKN1C/RNF111/CITED2/HIPK2	4
BP	GO:0007041	lysosomal transport	11/891	86/10468	0.112179	0.991216	0.991216	SORT1/NCOA4/TSG101/GNPTAB/VPS18/NEDD4/AKTIP/VPS53/EPG5/AP3D1/TRAK1	11
BP	GO:0031146	SCF-dependent proteasomal ubiquitin-dependent protein catabolic process	11/891	86/10468	0.112179	0.991216	0.991216	FBXO2/FBXO44/PSMB4/PSMA1/AMN1/PSMB3/PSMD3/PSMF1/FBXL5/CUL1/PSMD5	11
BP	GO:0072657	protein localization to membrane	47/891	462/10468	0.112258	0.991216	0.991216	EFCAB7/RAB13/RPS27/SRP9/ITGB1/TSPAN14/RPL27A/STX3/RPL41/TMED2/GPC6/SEC23A/GPHN/AMN/SRP14/ADAM10/RPL4/RPL26/IFT20/CDK5R1/GGA3/AP3D1/PDCD5/SPTBN4/EHD2/RPL13A/RPS11/CASP8/ARFRP1/PICK1/RPL3/BHLHE40-AS1/CLASP2/ZDHHC19/SLC7A11/AGER/GOPC/STX7/MAP7/ZDHHC14/VPS37A/FNTA/RPL30/YWHAZ/RPL35/ZDHHC12/DLG3	47
BP	GO:0032946	positive regulation of mononuclear cell proliferation	9/891	67/10468	0.113365	0.991216	0.991216	XCL1/FADD/ATAD5/TLR9/BCL6/HES1/AGER/IL6/EFNB1	9
BP	GO:0050000	chromosome localization	9/891	67/10468	0.113365	0.991216	0.991216	ATM/CDT1/SPAG5/CHMP6/SEH1L/MEI1/CENPC/BOD1/PINX1	9
BP	GO:0007088	regulation of mitotic nuclear division	16/891	136/10468	0.115199	0.991216	0.991216	RCC1/CDC14A/NEK2/SMC3/CDKN1C/ATM/NUSAP1/LCMT1/CDT1/CDC6/ANAPC1/RANBP1/STAG1/ANAPC4/PHIP/CDC26	16
BP	GO:0060828	regulation of canonical Wnt signaling pathway	21/891	187/10468	0.115215	0.991216	0.991216	PTPRU/PSMB4/BAMBI/FAM53B/PSMA1/PFDN5/GLI1/GPRC5B/IFT20/PSMB3/PSMD3/AXIN2/PSMF1/NPHP3/JADE1/CSNK1A1/MAPK14/FOXO3/TMEM64/UBR5/PSMD5	21
BP	GO:1902749	regulation of cell cycle G2/M phase transition	21/891	187/10468	0.115215	0.991216	0.991216	CDC7/PSMB4/NEK2/DTL/PSMA1/CCND1/ATM/CCP110/ATAD5/PSMB3/PSMD3/CDC6/PSMF1/CEP70/HAUS3/CUL1/PAXIP1/PINX1/PCM1/NBN/PSMD5	21
BP	GO:0070972	protein localization to endoplasmic reticulum	15/891	126/10468	0.115483	0.991216	0.991216	RPS27/SRP9/RPL27A/RPL41/OS9/SRP14/RPL4/RPL26/RPL13A/RPS11/RPL3/BHLHE40-AS1/BCAP29/RPL30/RPL35	15
BP	GO:0033866	nucleoside bisphosphate biosynthetic process	8/891	58/10468	0.116766	0.991216	0.991216	MPC2/PDPR/PDK2/ACSS2/SLC25A1/SLC26A1/ACSL6/SLC35B3	8
BP	GO:0034030	ribonucleoside bisphosphate biosynthetic process	8/891	58/10468	0.116766	0.991216	0.991216	MPC2/PDPR/PDK2/ACSS2/SLC25A1/SLC26A1/ACSL6/SLC35B3	8
BP	GO:0034033	purine nucleoside bisphosphate biosynthetic process	8/891	58/10468	0.116766	0.991216	0.991216	MPC2/PDPR/PDK2/ACSS2/SLC25A1/SLC26A1/ACSL6/SLC35B3	8
BP	GO:0002377	immunoglobulin production	10/891	77/10468	0.116844	0.991216	0.991216	XCL1/ATM/UNG/ATAD5/TLR9/BCL6/PMS2/IL6/PAXIP1/NBN	10
BP	GO:0036293	response to decreased oxygen levels	27/891	250/10468	0.117555	0.991216	0.991216	PSMB4/PSMA1/ATM/MDM2/AJUBA/TGFB3/PSMB3/PSMD3/ACTN4/EPAS1/PSMF1/AHCY/BACH1/PICK1/ATF4/ADSL/CPEB2/STC2/CPEB4/AGER/FOXO3/CITED2/NAMPT/HIPK2/MYC/PSMD5/ATP7A	27
BP	GO:0051222	positive regulation of protein transport	27/891	250/10468	0.117555	0.991216	0.991216	EFCAB7/LEPROT/CD58/MPC2/GLUL/MCU/TSG101/ZPR1/C2CD2L/MDM2/TGFB3/CDK5R1/PDCD5/SAE1/EDEM1/PDCD10/ICE1/AGER/MAPK14/SLC35D3/IL6/TOMM7/SRI/ACHE/PCM1/UBR5/JAK2	27
BP	GO:0043161	proteasome-mediated ubiquitin-dependent protein catabolic process	38/891	367/10468	0.118209	0.991216	0.991216	FBXO2/FBXO44/HECTD3/PSMB4/GBA/EDEM3/PSMA1/KAT5/AMN1/OS9/MDM2/JKAMP/NEDD4/FBXL19/N4BP1/ARRB2/TNFAIP1/PSMB3/PSMD3/TLK2/TRIB2/RMND5A/ANAPC1/PSMF1/HSPA13/EDEM1/RYBP/FBXL5/ANAPC4/UBE2K/CSNK1A1/UBR2/UBE3D/ANKIB1/CUL1/TRIB1/CDC26/PSMD5	38
BP	GO:0000154	rRNA modification	5/891	31/10468	0.118816	0.991216	0.991216	RRNAD1/FBL/NSUN3/GAR1/NSUN5	5
BP	GO:0006458	'de novo' protein folding	5/891	31/10468	0.118816	0.991216	0.991216	HSPA13/CHCHD4/HSPA9/TOR2A/TOR1A	5
BP	GO:0060976	coronary vasculature development	5/891	31/10468	0.118816	0.991216	0.991216	ARID2/SPRED1/LTBP1/SEC24B/PRDM1	5
BP	GO:2000008	regulation of protein localization to cell surface	5/891	31/10468	0.118816	0.991216	0.991216	LEPROT/LRIG2/STX3/GOPC/TOR1A	5
BP	GO:2000772	regulation of cellular senescence	5/891	31/10468	0.118816	0.991216	0.991216	B2M/BCL6/EEF1E1/CDK6/NAMPT	5
BP	GO:0097193	intrinsic apoptotic signaling pathway	24/891	219/10468	0.119223	0.991216	0.991216	IFI6/SFPQ/IVNS1ABP/SGMS1/RAD9A/DDIAS/ATM/MDM2/BRCA2/RPL26/ATAD5/PDK2/CEBPB/ATF4/PDCD10/UBE2K/HINT1/BAK1/MAP3K5/SOD2/HIPK2/CUL1/NBN/JAK2	24
BP	GO:0090398	cellular senescence	7/891	49/10468	0.119353	0.991216	0.991216	B2M/ID2/BCL6/EEF1E1/MAPK14/CDK6/NAMPT	7
BP	GO:0000959	mitochondrial RNA metabolic process	6/891	40/10468	0.120459	0.991216	0.991216	WARS2/DARS2/YARS2/TRMT10A/FOXO3/MTERF1	6
BP	GO:0010660	regulation of muscle cell apoptotic process	6/891	40/10468	0.120459	0.991216	0.991216	ARRB2/ATF4/E2F3/MAP3K5/SOD2/JAK2	6
BP	GO:0090092	regulation of transmembrane receptor protein serine/threonine kinase signaling pathway	15/891	127/10468	0.121254	0.991216	0.991216	NBL1/BAMBI/CDKN1C/BCL9L/GDF11/TGFB3/RNF111/MTMR4/DAND5/EID2/LTBP1/HES1/GDF9/CITED2/HIPK2	15
BP	GO:2000045	regulation of G1/S transition of mitotic cell cycle	15/891	127/10468	0.121254	0.991216	0.991216	CCND1/ATM/CCND2/MDM2/BRD7/RBL2/RPL26/CDC6/ID2/CDC45/JADE1/LSM11/CDK6/CNOT4/CNOT7	15
BP	GO:0072599	establishment of protein localization to endoplasmic reticulum	13/891	107/10468	0.121255	0.991216	0.991216	RPS27/SRP9/RPL27A/RPL41/SRP14/RPL4/RPL26/RPL13A/RPS11/RPL3/BHLHE40-AS1/RPL30/RPL35	13
BP	GO:0006278	RNA-dependent DNA biosynthetic process	9/891	68/10468	0.12139	0.991216	0.991216	NEK2/ATM/TEP1/PNKP/XRCC5/CCT8/GAR1/MAP3K4/PINX1	9
BP	GO:0071158	positive regulation of cell cycle arrest	9/891	68/10468	0.12139	0.991216	0.991216	ATM/MDM2/RBL2/RPL26/CRLF3/CDK5R1/ID2/CNOT4/CNOT7	9
BP	GO:0032388	positive regulation of intracellular transport	19/891	168/10468	0.122883	0.991216	0.991216	EFCAB7/LEPROT/ZPR1/MDM2/RAB21/NEDD4/SPAG5/CDK5R1/PDCD5/SAE1/EHD2/EDEM1/PDCD10/ICE1/MAPK14/SLC35D3/TOMM7/PCM1/UBR5	19
BP	GO:0071456	cellular response to hypoxia	17/891	148/10468	0.125411	0.991216	0.991216	PSMB4/PSMA1/MDM2/AJUBA/PSMB3/PSMD3/EPAS1/PSMF1/BACH1/CPEB2/STC2/FOXO3/CITED2/HIPK2/MYC/PSMD5/ATP7A	17
BP	GO:0120162	positive regulation of cold-induced thermogenesis	8/891	59/10468	0.125625	0.991216	0.991216	GPR3/LEPR/EPAS1/CEBPB/ACHE/DECR1/JAK2/LCN2	8
BP	GO:0006626	protein targeting to mitochondrion	11/891	88/10468	0.126323	0.991216	0.991216	LEPROT/HAX1/TIMM8B/TIMM21/TIMM44/PDCD5/SAE1/CHCHD4/PARL/TOMM7/IMMP2L	11
BP	GO:0010712	regulation of collagen metabolic process	4/891	23/10468	0.126629	0.991216	0.991216	ITGB1/TGFB3/ARRB2/IL6	4
BP	GO:0021575	hindbrain morphogenesis	4/891	23/10468	0.126629	0.991216	0.991216	GLI1/LHX5/HES1/ATP7A	4
BP	GO:0034122	negative regulation of toll-like receptor signaling pathway	4/891	23/10468	0.126629	0.991216	0.991216	TYRO3/ARRB2/TLR9/LRRC14	4
BP	GO:0051085	chaperone cofactor-dependent protein refolding	4/891	23/10468	0.126629	0.991216	0.991216	HSPA13/HSPA9/TOR2A/TOR1A	4
BP	GO:0071354	cellular response to interleukin-6	4/891	23/10468	0.126629	0.991216	0.991216	SELPLG/PHB/IL6/JAK2	4
BP	GO:1904951	positive regulation of establishment of protein localization	30/891	284/10468	0.126833	0.991216	0.991216	EFCAB7/LEPROT/CD58/MPC2/GLUL/MCU/TSG101/ZPR1/C2CD2L/MDM2/TGFB3/CDK5R1/PDCD5/SAE1/CASP8/CCT8/EDEM1/PDCD10/ICE1/AGER/MAPK14/SLC35D3/IL6/TOMM7/SRI/ACHE/PCM1/YWHAZ/UBR5/JAK2	30
BP	GO:0002573	myeloid leukocyte differentiation	15/891	128/10468	0.127192	0.991216	0.991216	HAX1/EFNA4/FADD/DHRS7B/NME1/ID2/CASP8/FARP2/CEBPB/RUNX1/MAPK14/CDK6/TMEM64/TRIB1/MYC	15
BP	GO:0007179	transforming growth factor beta receptor signaling pathway	15/891	128/10468	0.127192	0.991216	0.991216	BAMBI/CDKN1C/BCL9L/FUT8/TGFB3/RNF111/ARRB2/MTMR4/DAND5/EID2/LTBP1/GDF9/CITED2/HIPK2/FNTA	15
BP	GO:0044272	sulfur compound biosynthetic process	15/891	128/10468	0.127192	0.991216	0.991216	MPC2/CSGALNACT2/CHSY1/PDPR/PDK2/CNDP2/B3GNT2/GGT7/ACSS2/SLC25A1/SLC26A1/SLC7A11/MGST2/ACSL6/SLC35B3	15
BP	GO:0001738	morphogenesis of a polarized epithelium	13/891	108/10468	0.127762	0.991216	0.991216	PSMB4/PSMA1/GPC6/ARRB2/IFT20/PSMB3/PSMD3/AP2S1/PSMF1/NPHP3/SEC24B/PSMD5/DLG3	13
BP	GO:0009101	glycoprotein biosynthetic process	24/891	221/10468	0.128135	0.991216	0.991216	MAN1A2/EDEM3/CSGALNACT2/EXT2/ALG9/DPAGT1/PHLDA1/FUT8/CHSY1/HS3ST3A1/MGAT5B/MCFD2/B3GNT2/GALNT5/SDF2L1/TRAK1/PXYLP1/ST6GAL1/GALNT10/MGAT1/MAN1A1/DPY19L1/GOLGA2/ATP7A	24
BP	GO:0006029	proteoglycan metabolic process	7/891	50/10468	0.129217	0.991216	0.991216	CSGALNACT2/EXT2/CHSY1/HS3ST3A1/PXYLP1/IDUA/EGFLAM	7
BP	GO:1902686	mitochondrial outer membrane permeabilization involved in programmed cell death	7/891	50/10468	0.129217	0.991216	0.991216	STPG1/RHOT2/SPG7/CASP8/BAK1/TMEM14A/YWHAZ	7
BP	GO:0046425	regulation of JAK-STAT cascade	9/891	69/10468	0.129714	0.991216	0.991216	LEPROT/SOCS2/CRLF3/CDK5R1/PARP14/HES1/IL6/CNOT7/JAK2	9
BP	GO:0070665	positive regulation of leukocyte proliferation	9/891	69/10468	0.129714	0.991216	0.991216	XCL1/FADD/ATAD5/TLR9/BCL6/HES1/AGER/IL6/EFNB1	9
BP	GO:0090101	negative regulation of transmembrane receptor protein serine/threonine kinase signaling pathway	9/891	69/10468	0.129714	0.991216	0.991216	NBL1/BAMBI/BCL9L/TGFB3/MTMR4/DAND5/EID2/LTBP1/HIPK2	9
BP	GO:0002548	monocyte chemotaxis	3/891	15/10468	0.129757	0.991216	0.991216	NBL1/XCL1/IL6	3
BP	GO:0006448	regulation of translational elongation	3/891	15/10468	0.129757	0.991216	0.991216	SRP9/CPEB3/CPEB2	3
BP	GO:0007076	mitotic chromosome condensation	3/891	15/10468	0.129757	0.991216	0.991216	NUSAP1/SMC4/NCAPG	3
BP	GO:0044060	regulation of endocrine process	3/891	15/10468	0.129757	0.991216	0.991216	TACR2/FOXL2/GDF9	3
BP	GO:0048710	regulation of astrocyte differentiation	3/891	15/10468	0.129757	0.991216	0.991216	ID2/HES1/IL6	3
BP	GO:0050427	3'-phosphoadenosine 5'-phosphosulfate metabolic process	3/891	15/10468	0.129757	0.991216	0.991216	SULT1A1/SLC26A1/SLC35B3	3
BP	GO:0050650	chondroitin sulfate proteoglycan biosynthetic process	3/891	15/10468	0.129757	0.991216	0.991216	CSGALNACT2/CHSY1/PXYLP1	3
BP	GO:2000773	negative regulation of cellular senescence	3/891	15/10468	0.129757	0.991216	0.991216	BCL6/CDK6/NAMPT	3
BP	GO:0010718	positive regulation of epithelial to mesenchymal transition	5/891	32/10468	0.131538	0.991216	0.991216	BAMBI/BCL9L/TGFB3/AXIN2/IL6	5
BP	GO:0032205	negative regulation of telomere maintenance	5/891	32/10468	0.131538	0.991216	0.991216	ATM/ERCC4/XRCC5/PINX1/NBN	5
BP	GO:0032655	regulation of interleukin-12 production	5/891	32/10468	0.131538	0.991216	0.991216	ARRB2/TLR9/LTB/AGER/MAPK14	5
BP	GO:0032024	positive regulation of insulin secretion	6/891	41/10468	0.131573	0.991216	0.991216	MPC2/GLUL/MCU/C2CD2L/SRI/JAK2	6
BP	GO:0034308	primary alcohol metabolic process	6/891	41/10468	0.131573	0.991216	0.991216	DHRS3/ALDH1A2/GDE1/SULT1A1/GDPD1/ACSS2	6
BP	GO:0045023	G0 to G1 transition	6/891	41/10468	0.131573	0.991216	0.991216	CDC7/RAD51/PCGF2/RRM2/RYBP/CBX3	6
BP	GO:1902806	regulation of cell cycle G1/S phase transition	16/891	139/10468	0.132258	0.991216	0.991216	CCND1/ATM/CCND2/GLI1/MDM2/BRD7/RBL2/RPL26/CDC6/ID2/CDC45/JADE1/LSM11/CDK6/CNOT4/CNOT7	16
BP	GO:0030522	intracellular receptor signaling pathway	22/891	201/10468	0.132464	0.991216	0.991216	DHRS3/NCOA4/KAT5/PRCP/ESR2/NEDD4/ALDH1A2/ARRB2/PHB/ACTN4/NR1H2/CASP8/NRIP1/RUNX1/BRD8/TAF7/NR3C1/CITED2/TRIM24/UBR5/JAK2/NR6A1	22
BP	GO:0051656	establishment of organelle localization	39/891	382/10468	0.132769	0.991216	0.991216	ARHGAP21/STX3/ATM/RAP1B/TMED2/SEC23A/VPS18/NUSAP1/RHOT2/CDT1/SPAG5/GOSR1/WIPI1/CHMP6/SPIRE1/SEH1L/AP3D1/PIP5K1C/ACTN4/MCFD2/MEI1/CLASP2/TRAK1/COPG1/PDCD10/CENPC/SDAD1/SEC31A/SEC24B/SEC24D/AP3S1/BOD1/PINX1/PCM1/AP3M2/YWHAZ/DNM1/GOLGA2/TOR1A	39
BP	GO:0002521	leukocyte differentiation	32/891	307/10468	0.133556	0.991216	0.991216	LEPR/HAX1/EFNA4/IRF2BP2/ITGB1/FADD/ATM/TYRO3/B2M/DHRS7B/NME1/AP3D1/ID2/ZFP36L2/IL18R1/CASP8/FARP2/CEBPB/RUNX1/TLR9/BCL6/FNIP1/AGER/BAK1/MAPK14/PRDM1/IL6/CDK6/TMEM64/TRIB1/MYC/ATP7A	32
BP	GO:0006415	translational termination	12/891	99/10468	0.134408	0.991216	0.991216	MRPS16/MRPL49/MRPS7/MRPL38/MRPL4/MRPS12/MRPS6/MRPS22/MRPL22/MRPS10/MRPS33/MRPS28	12
BP	GO:0030518	intracellular steroid hormone receptor signaling pathway	12/891	99/10468	0.134408	0.991216	0.991216	NCOA4/KAT5/ESR2/NEDD4/ARRB2/PHB/NRIP1/RUNX1/TAF7/NR3C1/UBR5/JAK2	12
BP	GO:0006402	mRNA catabolic process	33/891	318/10468	0.134739	0.991216	0.991216	MRTO4/PSMB4/RPS27/PRPF18/CPEB3/RPL27A/PSMA1/ATM/RPL41/RPL4/RPL26/PSMB3/PSMD3/AXIN2/TNRC6C/ZFP36/RPL13A/RPS11/ZFP36L2/PSMF1/RBM38/RPL3/TTC37/MAPK14/LSM5/CNOT4/CNOT7/RPL30/YWHAZ/SECISBP2/PSMD5/RPL35/SET	33
BP	GO:0008088	axo-dendritic transport	8/891	60/10468	0.134823	0.991216	0.991216	SFPQ/RAB21/SPG7/AP3D1/TRAK1/TMEM108/AP3S1/AP3M2	8
BP	GO:0071897	DNA biosynthetic process	18/891	160/10468	0.135101	0.991216	0.991216	NEK2/DTL/NVL/ATM/TEP1/ARRB2/PHB/PNKP/XRCC5/CCT8/POLN/GAR1/WRNIP1/REV3L/MAP3K4/HNRNPA2B1/PINX1/MYC	18
BP	GO:0051052	regulation of DNA metabolic process	34/891	329/10468	0.135822	0.991216	0.991216	EYA3/CDC7/NEK2/NVL/SMC3/ATM/GLI1/BRCA2/RAD51/ERCC4/CDT1/ARRB2/TNFAIP1/ATAD5/CDC6/AXIN2/SPIRE1/WDR18/PNKP/XRCC5/CCT8/BCL6/PDS5A/WRNIP1/DEK/MAP3K4/IL6/HNRNPA2B1/DBF4/PAXIP1/PINX1/NBN/UBR5/MYC	34
BP	GO:0070085	glycosylation	20/891	181/10468	0.136705	0.991216	0.991216	MAN1A2/GBA/EDEM3/EXT2/ALG9/DPAGT1/FUT8/MGAT5B/MCFD2/B3GNT2/GALNT5/SDF2L1/TRAK1/ST6GAL1/PIGZ/GALNT10/MGAT1/MAN1A1/DPY19L1/GOLGA2	20
BP	GO:0031570	DNA integrity checkpoint	16/891	140/10468	0.138249	0.991216	0.991216	DTL/INTS7/RAD9A/CCND1/ATM/MDM2/RAD9B/RBL2/CDT1/RPL26/CDC6/CDC45/MAPK14/CNOT4/CNOT7/NBN	16
BP	GO:0001906	cell killing	9/891	70/10468	0.138332	0.991216	0.991216	XCL1/CFH/FADD/B2M/ARRB2/AGER/STX7/ULBP2/RPL30	9
BP	GO:0061418	regulation of transcription from RNA polymerase II promoter in response to hypoxia	9/891	70/10468	0.138332	0.991216	0.991216	PSMB4/PSMA1/PSMB3/PSMD3/EPAS1/PSMF1/BACH1/CITED2/PSMD5	9
BP	GO:1904892	regulation of STAT cascade	9/891	70/10468	0.138332	0.991216	0.991216	LEPROT/SOCS2/CRLF3/CDK5R1/PARP14/HES1/IL6/CNOT7/JAK2	9
BP	GO:0072665	protein localization to vacuole	7/891	51/10468	0.139476	0.991216	0.991216	NCOA4/GNPTAB/VPS36/NEDD4/GGA3/AP3D1/VPS37A	7
BP	GO:0098930	axonal transport	7/891	51/10468	0.139476	0.991216	0.991216	RAB21/SPG7/AP3D1/TRAK1/TMEM108/AP3S1/AP3M2	7
BP	GO:0035567	non-canonical Wnt signaling pathway	13/891	110/10468	0.141352	0.991216	0.991216	PSMB4/PSMA1/GPC6/CALM1/ARRB2/PSMB3/PSMD3/TNRC6C/AP2S1/PSMF1/NPHP3/IFT80/PSMD5	13
BP	GO:0051983	regulation of chromosome segregation	11/891	90/10468	0.141403	0.991216	0.991216	SFPQ/NEK2/ATM/LCMT1/CDT1/SPAG5/CDC6/AXIN2/ANAPC1/ANAPC4/CDC26	11
BP	GO:2000278	regulation of DNA biosynthetic process	11/891	90/10468	0.141403	0.991216	0.991216	NEK2/NVL/ATM/ARRB2/PNKP/XRCC5/CCT8/MAP3K4/HNRNPA2B1/PINX1/MYC	11
BP	GO:0051262	protein tetramerization	12/891	100/10468	0.14166	0.991216	0.991216	RCC1/PCBD1/B2M/ALDH1A2/RRM2/ADSL/PCBD2/ME1/SOD2/ACHE/DECR1/GOLGA2	12
BP	GO:0033673	negative regulation of kinase activity	20/891	182/10468	0.142034	0.991216	0.991216	GBA/AIDA/CDKN1C/SMPD1/TSG101/AJUBA/SPRED1/MVP/CHMP6/MIDN/AKT1S1/TRIB2/FOXA2/ZGPAT/PRKAR2A/NPRL2/TAF7/PRKRIP1/TRIB1/RGS3	20
BP	GO:0019730	antimicrobial humoral response	4/891	24/10468	0.142314	0.991216	0.991216	LEAP2/RPL30/LCN2/ATP7A	4
BP	GO:0030261	chromosome condensation	4/891	24/10468	0.142314	0.991216	0.991216	NUSAP1/SMC4/NCAPG/NCAPG2	4
BP	GO:0030851	granulocyte differentiation	4/891	24/10468	0.142314	0.991216	0.991216	HAX1/DHRS7B/RUNX1/TRIB1	4
BP	GO:0050918	positive chemotaxis	4/891	24/10468	0.142314	0.991216	0.991216	ARTN/ROBO3/CCR4/AGER	4
BP	GO:0061099	negative regulation of protein tyrosine kinase activity	4/891	24/10468	0.142314	0.991216	0.991216	TSG101/MVP/CHMP6/ZGPAT	4
BP	GO:2000765	regulation of cytoplasmic translation	4/891	24/10468	0.142314	0.991216	0.991216	CPEB3/RPL13A/CPEB2/CPEB4	4
BP	GO:0008089	anterograde axonal transport	6/891	42/10468	0.143155	0.991216	0.991216	RAB21/SPG7/AP3D1/TRAK1/AP3S1/AP3M2	6
BP	GO:0044839	cell cycle G2/M phase transition	25/891	235/10468	0.144311	0.991216	0.991216	CDC7/PSMB4/NEK2/DTL/PSMA1/CCND1/ATM/PHLDA1/AJUBA/CCP110/LCMT1/ATAD5/PSMB3/PSMD3/CDC6/PSMF1/BACH1/CEP70/HAUS3/CUL1/PAXIP1/PINX1/PCM1/NBN/PSMD5	25
BP	GO:0033238	regulation of cellular amine metabolic process	8/891	61/10468	0.144354	0.991216	0.991216	PSMB4/PSMA1/PSMB3/PSMD3/ODC1/PSMF1/SLC7A11/PSMD5	8
BP	GO:0002204	somatic recombination of immunoglobulin genes involved in immune response	5/891	33/10468	0.144844	0.991216	0.991216	UNG/ATAD5/BCL6/PAXIP1/NBN	5
BP	GO:0002208	somatic diversification of immunoglobulins involved in immune response	5/891	33/10468	0.144844	0.991216	0.991216	UNG/ATAD5/BCL6/PAXIP1/NBN	5
BP	GO:0006623	protein targeting to vacuole	5/891	33/10468	0.144844	0.991216	0.991216	NCOA4/GNPTAB/NEDD4/AP3D1/VPS37A	5
BP	GO:0032456	endocytic recycling	5/891	33/10468	0.144844	0.991216	0.991216	RAB13/VPS53/GGA3/EPG5/EHD2	5
BP	GO:0032615	interleukin-12 production	5/891	33/10468	0.144844	0.991216	0.991216	ARRB2/TLR9/LTB/AGER/MAPK14	5
BP	GO:0043113	receptor clustering	5/891	33/10468	0.144844	0.991216	0.991216	GPHN/PICK1/SLC7A11/FNTA/DLG3	5
BP	GO:0045190	isotype switching	5/891	33/10468	0.144844	0.991216	0.991216	UNG/ATAD5/BCL6/PAXIP1/NBN	5
BP	GO:0045824	negative regulation of innate immune response	5/891	33/10468	0.144844	0.991216	0.991216	TYRO3/ARRB2/NR1H2/PARP14/CNOT7	5
BP	GO:0072523	purine-containing compound catabolic process	5/891	33/10468	0.144844	0.991216	0.991216	NUDT4/HDDC3/AHCY/HINT1/NUDT1	5
BP	GO:0006310	DNA recombination	24/891	225/10468	0.147129	0.991216	0.991216	SFPQ/CDC7/SFR1/ATM/UNG/BRCA2/TEP1/RAD51/ERCC4/ATAD5/RAD51D/INO80C/XRCC5/CDC45/DMC1/BCL6/POLN/MND1/UBR2/REV3L/PAXIP1/NBN/RECQL4/SWI5	24
BP	GO:0032103	positive regulation of response to external stimulus	17/891	152/10468	0.148651	0.991216	0.991216	ARTN/PTGER3/XCL1/STX3/ADAM10/GPRC5B/THBD/CEBPB/CCR4/TLR9/MGST2/OSMR/FGF18/AGER/MAPK14/IL6/JAK2	17
BP	GO:0060071	Wnt signaling pathway, planar cell polarity pathway	10/891	81/10468	0.148746	0.991216	0.991216	PSMB4/PSMA1/GPC6/ARRB2/PSMB3/PSMD3/AP2S1/PSMF1/NPHP3/PSMD5	10
BP	GO:0032210	regulation of telomere maintenance via telomerase	7/891	52/10468	0.150116	0.991216	0.991216	NEK2/ATM/PNKP/XRCC5/CCT8/MAP3K4/PINX1	7
BP	GO:0035794	positive regulation of mitochondrial membrane permeability	7/891	52/10468	0.150116	0.991216	0.991216	STPG1/RHOT2/SPG7/CASP8/BAK1/TMEM14A/YWHAZ	7
BP	GO:1905710	positive regulation of membrane permeability	7/891	52/10468	0.150116	0.991216	0.991216	STPG1/RHOT2/SPG7/CASP8/BAK1/TMEM14A/YWHAZ	7
BP	GO:0002828	regulation of type 2 immune response	3/891	16/10468	0.150126	0.991216	0.991216	XCL1/BCL6/IL6	3
BP	GO:0003230	cardiac atrium development	3/891	16/10468	0.150126	0.991216	0.991216	MDM2/DAND5/NPHP3	3
BP	GO:0006337	nucleosome disassembly	3/891	16/10468	0.150126	0.991216	0.991216	ARID2/SMARCC2/SET	3
BP	GO:0006775	fat-soluble vitamin metabolic process	3/891	16/10468	0.150126	0.991216	0.991216	CYP2R1/ALDH1A2/VKORC1L1	3
BP	GO:0006907	pinocytosis	3/891	16/10468	0.150126	0.991216	0.991216	ACTN4/NR1H2/MAPKAPK3	3
BP	GO:0008210	estrogen metabolic process	3/891	16/10468	0.150126	0.991216	0.991216	HSD17B7/SULT1A1/TIPARP	3
BP	GO:0021680	cerebellar Purkinje cell layer development	3/891	16/10468	0.150126	0.991216	0.991216	LHX5/UQCRQ/ATP7A	3
BP	GO:0021696	cerebellar cortex morphogenesis	3/891	16/10468	0.150126	0.991216	0.991216	GLI1/LHX5/ATP7A	3
BP	GO:0040019	positive regulation of embryonic development	3/891	16/10468	0.150126	0.991216	0.991216	FOXA2/CLASP2/HES1	3
BP	GO:0044331	cell-cell adhesion mediated by cadherin	3/891	16/10468	0.150126	0.991216	0.991216	PTPRU/CDH15/FOXA2	3
BP	GO:0060045	positive regulation of cardiac muscle cell proliferation	3/891	16/10468	0.150126	0.991216	0.991216	GLI1/MAPK14/ZFPM2	3
BP	GO:0060122	inner ear receptor cell stereocilium organization	3/891	16/10468	0.150126	0.991216	0.991216	IFT20/HES1/SEC24B	3
BP	GO:0060396	growth hormone receptor signaling pathway	3/891	16/10468	0.150126	0.991216	0.991216	LEPROT/SOCS2/JAK2	3
BP	GO:0090659	walking behavior	3/891	16/10468	0.150126	0.991216	0.991216	ARRB2/SPTBN4/HIPK2	3
BP	GO:0097150	neuronal stem cell population maintenance	3/891	16/10468	0.150126	0.991216	0.991216	HES1/FOXO3/PCM1	3
BP	GO:2000737	negative regulation of stem cell differentiation	3/891	16/10468	0.150126	0.991216	0.991216	ZFP36L2/HES1/HSPA9	3
BP	GO:0034976	response to endoplasmic reticulum stress	25/891	237/10468	0.15404	0.991216	0.991216	FBXO2/FBXO44/SESN2/EDEM3/CCND1/OS9/FICD/JKAMP/WIPI1/CEBPB/HSPA13/USP25/SDF2L1/ATF4/EDEM1/MANF/UBE2K/SEC31A/TTC23L/STC2/BAK1/MAP3K5/HERPUD2/COPS5/TOR1A	25
BP	GO:1900182	positive regulation of protein localization to nucleus	8/891	62/10468	0.154206	0.991216	0.991216	SESN2/EFCAB7/ZPR1/KAT7/CCT8/MAPK14/PINX1/UBR5	8
BP	GO:1903747	regulation of establishment of protein localization to mitochondrion	8/891	62/10468	0.154206	0.991216	0.991216	LEPROT/HAX1/PDCD5/SAE1/CASP8/PARL/TOMM7/YWHAZ	8
BP	GO:1904019	epithelial cell apoptotic process	8/891	62/10468	0.154206	0.991216	0.991216	SORT1/ARRB2/ZFP36/FOXO3/MAP3K5/IL6/KRIT1/JAK2	8
BP	GO:0009411	response to UV	14/891	122/10468	0.154261	0.991216	0.991216	DTL/CCND1/MDM2/BRCA2/ERCC5/NEDD4/ERCC4/N4BP1/RBL2/RPL26/ATF4/BAK1/MAP3K4/MYC	14
BP	GO:0007018	microtubule-based movement	23/891	216/10468	0.155155	0.991216	0.991216	SFPQ/DNAH14/ARHGAP21/RAB21/IFT43/RHOT2/CFAP20/SPG7/IFT20/AP3D1/DYNLRB1/TRAK1/COPG1/NPHP3/TMEM108/IFT80/AP3S1/KIF20A/ICK/TTC26/PCM1/AP3M2/WDR34	23
BP	GO:0002637	regulation of immunoglobulin production	6/891	43/10468	0.155187	0.991216	0.991216	XCL1/ATAD5/TLR9/BCL6/IL6/PAXIP1	6
BP	GO:0007080	mitotic metaphase plate congression	6/891	43/10468	0.155187	0.991216	0.991216	CDT1/CHMP6/SEH1L/CENPC/BOD1/PINX1	6
BP	GO:0010657	muscle cell apoptotic process	6/891	43/10468	0.155187	0.991216	0.991216	ARRB2/ATF4/E2F3/MAP3K5/SOD2/JAK2	6
BP	GO:0060541	respiratory system development	13/891	112/10468	0.155694	0.991216	0.991216	MAN1A2/GLI1/TGFB3/ALDH1A2/EPAS1/NPHP3/HES1/SEC24B/SLC7A11/FGF18/AIMP2/ZFPM2/ATP7A	13
BP	GO:0010389	regulation of G2/M transition of mitotic cell cycle	19/891	174/10468	0.155755	0.991216	0.991216	CDC7/PSMB4/NEK2/DTL/PSMA1/CCND1/ATM/CCP110/PSMB3/PSMD3/CDC6/PSMF1/CEP70/HAUS3/CUL1/PINX1/PCM1/NBN/PSMD5	19
BP	GO:0031058	positive regulation of histone modification	9/891	72/10468	0.156419	0.991216	0.991216	ATM/SART3/BRD7/KAT7/BCL6/JARID2/C6orf89/PAXIP1/PHF19	9
BP	GO:0033045	regulation of sister chromatid segregation	9/891	72/10468	0.156419	0.991216	0.991216	SFPQ/ATM/LCMT1/CDT1/CDC6/AXIN2/ANAPC1/ANAPC4/CDC26	9
BP	GO:0048469	cell maturation	12/891	102/10468	0.156778	0.991216	0.991216	CDKN1C/GDF11/BRCA2/SPTBN4/ID2/EPAS1/FARP2/PICK1/DMC1/HES1/FOXO3/PTBP3	12
BP	GO:0000045	autophagosome assembly	10/891	82/10468	0.157353	0.991216	0.991216	PIP4K2A/ATG2A/MAP1LC3B2/MAP1LC3B/IFT20/WIPI1/ATG16L1/TP53INP2/NPRL2/ATG12	10
BP	GO:0006903	vesicle targeting	10/891	82/10468	0.157353	0.991216	0.991216	TMED2/SEC23A/GOSR1/WIPI1/MCFD2/CLASP2/SEC31A/SEC24B/SEC24D/GOLGA2	10
BP	GO:0002224	toll-like receptor signaling pathway	11/891	92/10468	0.157389	0.991216	0.991216	BCL10/TLR5/UNC93B1/FADD/TYRO3/ARRB2/EPG5/CASP8/MAPKAPK3/TLR9/LRRC14	11
BP	GO:0048771	tissue remodeling	11/891	92/10468	0.157389	0.991216	0.991216	LEPR/EFNA4/ELF3/MDM2/TGFB3/EPAS1/AGER/BAK1/IL6/TMEM64/ATP7A	11
BP	GO:0006612	protein targeting to membrane	18/891	164/10468	0.158449	0.991216	0.991216	RPS27/SRP9/RPL27A/RPL41/SRP14/RPL4/RPL26/CDK5R1/RPL13A/RPS11/RPL3/BHLHE40-AS1/ZDHHC19/ZDHHC14/VPS37A/RPL30/RPL35/ZDHHC12	18
BP	GO:0021700	developmental maturation	18/891	164/10468	0.158449	0.991216	0.991216	CDKN1C/GDF11/BRCA2/ALDH1A2/CDK5R1/AP3D1/SPTBN4/ID2/EPAS1/FARP2/TRPC4AP/PICK1/DMC1/PLXNB1/HES1/FOXO3/YWHAZ/PTBP3	18
BP	GO:0008156	negative regulation of DNA replication	5/891	34/10468	0.158698	0.991216	0.991216	SMC3/BRCA2/CDC6/BCL6/PDS5A	5
BP	GO:0014909	smooth muscle cell migration	5/891	34/10468	0.158698	0.991216	0.991216	MDM2/TPM1/PLXNA1/TRIB1/ATP7A	5
BP	GO:0022617	extracellular matrix disassembly	5/891	34/10468	0.158698	0.991216	0.991216	ADAM10/MMP15/CLASP2/IL6/BMP1	5
BP	GO:0038202	TORC1 signaling	5/891	34/10468	0.158698	0.991216	0.991216	SESN2/RRAGC/ATM/SEH1L/FNIP1	5
BP	GO:0002369	T cell cytokine production	4/891	25/10468	0.158718	0.991216	0.991216	XCL1/B2M/IL18R1/IL6	4
BP	GO:0002437	inflammatory response to antigenic stimulus	4/891	25/10468	0.158718	0.991216	0.991216	PSMB4/PSMA1/PNMA1/AHCY	4
BP	GO:0006779	porphyrin-containing compound biosynthetic process	4/891	25/10468	0.158718	0.991216	0.991216	UROD/RSAD1/SLC25A38/CPOX	4
BP	GO:0008542	visual learning	4/891	25/10468	0.158718	0.991216	0.991216	ITGB1/MEIS2/IFT20/SLC7A11	4
BP	GO:0032509	endosome transport via multivesicular body sorting pathway	4/891	25/10468	0.158718	0.991216	0.991216	LEPROT/SORT1/VPS36/VPS37A	4
BP	GO:0032653	regulation of interleukin-10 production	4/891	25/10468	0.158718	0.991216	0.991216	XCL1/TRIB2/TLR9/AGER	4
BP	GO:0033522	histone H2A ubiquitination	4/891	25/10468	0.158718	0.991216	0.991216	PCGF2/RYBP/UBR2/UBR5	4
BP	GO:0045737	positive regulation of cyclin-dependent protein serine/threonine kinase activity	4/891	25/10468	0.158718	0.991216	0.991216	CCND1/CCND2/CDK5R1/CDC6	4
BP	GO:0048286	lung alveolus development	4/891	25/10468	0.158718	0.991216	0.991216	MAN1A2/TGFB3/SLC7A11/ATP7A	4
BP	GO:0051984	positive regulation of chromosome segregation	4/891	25/10468	0.158718	0.991216	0.991216	SFPQ/CDT1/CDC6/ANAPC4	4
BP	GO:0060043	regulation of cardiac muscle cell proliferation	4/891	25/10468	0.158718	0.991216	0.991216	GLI1/JARID2/MAPK14/ZFPM2	4
BP	GO:0070670	response to interleukin-4	4/891	25/10468	0.158718	0.991216	0.991216	XCL1/RPL3/PARP14/NFIL3	4
BP	GO:0071353	cellular response to interleukin-4	4/891	25/10468	0.158718	0.991216	0.991216	XCL1/RPL3/PARP14/NFIL3	4
BP	GO:0030336	negative regulation of cell migration	15/891	133/10468	0.15931	0.991216	0.991216	NBL1/PTPRU/ARID2/SPRED1/TPM1/CLASP2/NISCH/PDCD10/ADTRP/FOXO3/CITED2/KRIT1/TRIB1/SCAI/RAP2C	15
BP	GO:0032984	protein-containing complex disassembly	29/891	281/10468	0.159981	0.991216	0.991216	CAPZA1/GBA/EIF2D/MRPS16/TSG101/MRPL49/ARID2/SMARCC2/MAP1LC3B2/CKAP2/MAP1LC3B/MRPS7/MRPL38/EPG5/MRPL4/MRPS12/SPTBN4/SPEF1/MRPS6/CLASP2/VILL/MRPS22/CSNK1A1/MRPL22/MRPS10/MRPS33/MRPS28/MYC/SET	29
BP	GO:0001909	leukocyte mediated cytotoxicity	7/891	53/10468	0.161123	0.991216	0.991216	XCL1/FADD/B2M/ARRB2/AGER/STX7/ULBP2	7
BP	GO:0007091	metaphase/anaphase transition of mitotic cell cycle	7/891	53/10468	0.161123	0.991216	0.991216	ATM/LCMT1/CDT1/CDC6/ANAPC1/ANAPC4/CDC26	7
BP	GO:0030512	negative regulation of transforming growth factor beta receptor signaling pathway	7/891	53/10468	0.161123	0.991216	0.991216	BAMBI/BCL9L/TGFB3/MTMR4/DAND5/EID2/LTBP1	7
BP	GO:0051310	metaphase plate congression	7/891	53/10468	0.161123	0.991216	0.991216	CDT1/SPAG5/CHMP6/SEH1L/CENPC/BOD1/PINX1	7
BP	GO:1902532	negative regulation of intracellular signal transduction	36/891	357/10468	0.161504	0.991216	0.991216	SESN2/LEPROT/GBA/IVNS1ABP/AIDA/ITGB1/SMPD1/PDE3B/DDIAS/ATM/SIK2/C1QL4/MDM2/SOCS2/AJUBA/CALM1/SPRED1/ARRB2/TNFAIP1/ATAD5/PHB/PHLPP1/AKT1S1/CASP8/NPRL2/PARP14/MECOM/BCL6/FNIP1/UBR2/EPM2A/SOD2/SRI/MYC/RGS3/SCAI	36
BP	GO:0016236	macroautophagy	27/891	260/10468	0.162169	0.991216	0.991216	SESN2/RRAGC/GBA/QSOX1/PIP4K2A/TSG101/ATG2A/MAP1LC3B2/VPS36/NEDD4/MAP1LC3B/IFT20/CDK5R1/WIPI1/CHMP6/EPG5/SUPT5H/ATG16L1/TP53INP2/NPRL2/WDFY3/ATG12/ATP6V0E1/ATP6V1G2/EPM2A/TOMM7/VPS37A	27
BP	GO:0022411	cellular component disassembly	42/891	423/10468	0.163741	0.991216	0.991216	CAPZA1/HAX1/GBA/EIF2D/MRPS16/TSG101/ATG2A/MRPL49/ARID2/SMARCC2/MAP1LC3B2/CKAP2/NEK9/TGFB3/ADAM10/MMP15/MAP1LC3B/WIPI1/MRPS7/MRPL38/EPG5/MRPL4/MRPS12/SPTBN4/SPEF1/MRPS6/CLASP2/VILL/FOXL2/MRPS22/ATG12/CSNK1A1/MRPL22/MRPS10/IL6/TOMM7/MRPS33/BMP1/MRPS28/MYC/GOLGA2/SET	42
BP	GO:0002824	positive regulation of adaptive immune response based on somatic recombination of immune receptors built from immunoglobulin superfamily domains	8/891	63/10468	0.164369	0.991216	0.991216	XCL1/FADD/B2M/ATAD5/IL18R1/STX7/IL6/PAXIP1	8
BP	GO:0046887	positive regulation of hormone secretion	8/891	63/10468	0.164369	0.991216	0.991216	MPC2/GLUL/TACR2/MCU/C2CD2L/FOXL2/SRI/JAK2	8
BP	GO:0090100	positive regulation of transmembrane receptor protein serine/threonine kinase signaling pathway	8/891	63/10468	0.164369	0.991216	0.991216	CDKN1C/GDF11/TGFB3/RNF111/HES1/GDF9/CITED2/HIPK2	8
BP	GO:0030278	regulation of ossification	12/891	103/10468	0.164636	0.991216	0.991216	DHRS3/GLI1/TGFB3/CHSY1/AXIN2/ID2/CEBPB/MAPK14/IL6/CDK6/CEBPD/TMEM64	12
BP	GO:0001889	liver development	11/891	93/10468	0.16571	0.991216	0.991216	ARID5B/CCND1/GLI1/GNPNAT1/ALDH1A2/CEBPB/NPHP3/HES1/JARID2/CITED2/ATP7A	11
BP	GO:0071482	cellular response to light stimulus	11/891	93/10468	0.16571	0.991216	0.991216	MDM2/CALM1/NEDD4/ERCC4/N4BP1/RBL2/RPL26/ATF4/BAK1/FNTA/MYC	11
BP	GO:0031349	positive regulation of defense response	30/891	293/10468	0.16573	0.991216	0.991216	SFPQ/PTGER3/BCL10/PSMB4/TLR5/PSMA1/UNC93B1/FADD/TYRO3/GPRC5B/ARRB2/PSMB3/PSMD3/EPG5/CASP8/XRCC5/PSMF1/CEBPB/MAPKAPK3/TLR9/UBE2K/TXK/MGST2/OSMR/ULBP2/IL6/CUL1/LRRC14/JAK2/PSMD5	30
BP	GO:0022409	positive regulation of cell-cell adhesion	15/891	134/10468	0.166207	0.991216	0.991216	PTPRU/BCL10/XCL1/FADD/PIEZO1/AP3D1/FOXA2/RUNX1/GRAP2/BCL6/HES1/AGER/CITED2/IL6/EFNB1	15
BP	GO:0010498	proteasomal protein catabolic process	41/891	413/10468	0.167432	0.991216	0.991216	FBXO2/FBXO44/HECTD3/PSMB4/GBA/EDEM3/PSMA1/KAT5/AMN1/OS9/MDM2/JKAMP/NEDD4/FBXL19/N4BP1/ARRB2/TNFAIP1/PSMB3/PSMD3/TLK2/TRIB2/RMND5A/ANAPC1/PSMF1/HSPA13/USP25/SDF2L1/EDEM1/RYBP/FBXL5/ANAPC4/UBE2K/CSNK1A1/UBR2/UBE3D/ANKIB1/CUL1/TRIB1/CDC26/PSMD5/TOR1A	41
BP	GO:1901796	regulation of signal transduction by p53 class mediator	17/891	155/10468	0.167536	0.991216	0.991216	KAT5/RAD9A/ATM/MDM2/RAD9B/SPRED1/BRD7/RPL26/ATAD5/CDK5R1/SETD9/TAF7/EEF1E1/MAPK14/TRIM24/HIPK2/NBN	17
BP	GO:0007005	mitochondrion organization	42/891	424/10468	0.167617	0.991216	0.991216	STPG1/IFI6/SESN2/LEPROT/HAX1/GBA/ATG2A/TIMM8B/MAP1LC3B2/MEF2A/RHOT2/MAP1LC3B/SPG7/ARRB2/PHB/WIPI1/AFG3L2/TIMM21/TIMM44/PDCD5/CEP89/SAE1/EPAS1/CASP8/NDUFV3/CHCHD4/TRAK1/PARL/ATG12/LYRM7/FNIP1/BAK1/TMEM14A/NDUFAF4/SOD2/TOMM7/MTERF1/IMMP2L/TMEM70/YWHAZ/APOO/ATP7A	42
BP	GO:0099072	regulation of postsynaptic membrane neurotransmitter receptor levels	6/891	44/10468	0.167646	0.991216	0.991216	STX3/GPC6/GPHN/ADAM10/DNM1/DLG3	6
BP	GO:0090287	regulation of cellular response to growth factor stimulus	16/891	145/10468	0.170427	0.991216	0.991216	NBL1/BAMBI/CDKN1C/BCL9L/TGFB3/NEDD4/RNF111/MTMR4/DAND5/EID2/LTBP1/TMEM108/HES1/FGF18/CITED2/HIPK2	16
BP	GO:0001556	oocyte maturation	3/891	17/10468	0.171427	0.991216	0.991216	BRCA2/DMC1/FOXO3	3
BP	GO:0002675	positive regulation of acute inflammatory response	3/891	17/10468	0.171427	0.991216	0.991216	PTGER3/OSMR/IL6	3
BP	GO:0002701	negative regulation of production of molecular mediator of immune response	3/891	17/10468	0.171427	0.991216	0.991216	XCL1/TGFB3/BCL6	3
BP	GO:0006817	phosphate ion transport	3/891	17/10468	0.171427	0.991216	0.991216	XPR1/CEBPB/ATF4	3
BP	GO:0006953	acute-phase response	3/891	17/10468	0.171427	0.991216	0.991216	PTGER3/CEBPB/IL6	3
BP	GO:0016226	iron-sulfur cluster assembly	3/891	17/10468	0.171427	0.991216	0.991216	ISCU/NUBP1/HSPA9	3
BP	GO:0016254	preassembly of GPI anchor in ER membrane	3/891	17/10468	0.171427	0.991216	0.991216	PIGC/PIGZ/PIGY	3
BP	GO:0018230	peptidyl-L-cysteine S-palmitoylation	3/891	17/10468	0.171427	0.991216	0.991216	ZDHHC19/ZDHHC14/ZDHHC12	3
BP	GO:0018231	peptidyl-S-diacylglycerol-L-cysteine biosynthetic process from peptidyl-cysteine	3/891	17/10468	0.171427	0.991216	0.991216	ZDHHC19/ZDHHC14/ZDHHC12	3
BP	GO:0031163	metallo-sulfur cluster assembly	3/891	17/10468	0.171427	0.991216	0.991216	ISCU/NUBP1/HSPA9	3
BP	GO:0031498	chromatin disassembly	3/891	17/10468	0.171427	0.991216	0.991216	ARID2/SMARCC2/SET	3
BP	GO:0031954	positive regulation of protein autophosphorylation	3/891	17/10468	0.171427	0.991216	0.991216	CALM1/NBN/RAP2C	3
BP	GO:0034162	toll-like receptor 9 signaling pathway	3/891	17/10468	0.171427	0.991216	0.991216	UNC93B1/EPG5/TLR9	3
BP	GO:0045947	negative regulation of translational initiation	3/891	17/10468	0.171427	0.991216	0.991216	EIF4EBP2/RPL13A/ATF4	3
BP	GO:0046426	negative regulation of JAK-STAT cascade	3/891	17/10468	0.171427	0.991216	0.991216	LEPROT/SOCS2/PARP14	3
BP	GO:0048247	lymphocyte chemotaxis	3/891	17/10468	0.171427	0.991216	0.991216	XCL1/ADAM10/HSD3B7	3
BP	GO:0048490	anterograde synaptic vesicle transport	3/891	17/10468	0.171427	0.991216	0.991216	AP3D1/AP3S1/AP3M2	3
BP	GO:0070229	negative regulation of lymphocyte apoptotic process	3/891	17/10468	0.171427	0.991216	0.991216	BCL10/FADD/BCL6	3
BP	GO:0071378	cellular response to growth hormone stimulus	3/891	17/10468	0.171427	0.991216	0.991216	LEPROT/SOCS2/JAK2	3
BP	GO:0099514	synaptic vesicle cytoskeletal transport	3/891	17/10468	0.171427	0.991216	0.991216	AP3D1/AP3S1/AP3M2	3
BP	GO:0099517	synaptic vesicle transport along microtubule	3/891	17/10468	0.171427	0.991216	0.991216	AP3D1/AP3S1/AP3M2	3
BP	GO:1904355	positive regulation of telomere capping	3/891	17/10468	0.171427	0.991216	0.991216	NEK2/PNKP/MAP3K4	3
BP	GO:1904646	cellular response to amyloid-beta	3/891	17/10468	0.171427	0.991216	0.991216	AGER/FOXO3/NAMPT	3
BP	GO:1904893	negative regulation of STAT cascade	3/891	17/10468	0.171427	0.991216	0.991216	LEPROT/SOCS2/PARP14	3
BP	GO:0010717	regulation of epithelial to mesenchymal transition	7/891	54/10468	0.172481	0.991216	0.991216	BAMBI/BCL9L/TGFB3/AXIN2/FOXA2/CLASP2/IL6	7
BP	GO:0010965	regulation of mitotic sister chromatid separation	7/891	54/10468	0.172481	0.991216	0.991216	ATM/LCMT1/CDT1/CDC6/ANAPC1/ANAPC4/CDC26	7
BP	GO:0044784	metaphase/anaphase transition of cell cycle	7/891	54/10468	0.172481	0.991216	0.991216	ATM/LCMT1/CDT1/CDC6/ANAPC1/ANAPC4/CDC26	7
BP	GO:0008631	intrinsic apoptotic signaling pathway in response to oxidative stress	5/891	35/10468	0.173067	0.991216	0.991216	SFPQ/PDCD10/MAP3K5/SOD2/JAK2	5
BP	GO:0018198	peptidyl-cysteine modification	5/891	35/10468	0.173067	0.991216	0.991216	NOS1AP/CHCHD4/ZDHHC19/ZDHHC14/ZDHHC12	5
BP	GO:0032677	regulation of interleukin-8 production	5/891	35/10468	0.173067	0.991216	0.991216	BCL10/CD58/TLR5/FADD/TLR9	5
BP	GO:0045840	positive regulation of mitotic nuclear division	5/891	35/10468	0.173067	0.991216	0.991216	NUSAP1/CDT1/RANBP1/ANAPC4/PHIP	5
BP	GO:0090342	regulation of cell aging	5/891	35/10468	0.173067	0.991216	0.991216	B2M/BCL6/EEF1E1/CDK6/NAMPT	5
BP	GO:1902373	negative regulation of mRNA catabolic process	5/891	35/10468	0.173067	0.991216	0.991216	AXIN2/ZFP36/RBM38/MAPK14/SECISBP2	5
BP	GO:0044774	mitotic DNA integrity checkpoint	11/891	94/10468	0.174243	0.991216	0.991216	RAD9A/CCND1/ATM/MDM2/RAD9B/RBL2/RPL26/CDC6/CNOT4/CNOT7/NBN	11
BP	GO:0045667	regulation of osteoblast differentiation	8/891	64/10468	0.174833	0.991216	0.991216	GLI1/AXIN2/ID2/CEBPB/IL6/CDK6/CEBPD/TMEM64	8
BP	GO:0051348	negative regulation of transferase activity	22/891	209/10468	0.174941	0.991216	0.991216	GBA/AIDA/CDKN1C/SMPD1/TSG101/AJUBA/SPRED1/MVP/CHMP6/MIDN/ZFP36/AKT1S1/TRIB2/FOXA2/ZGPAT/PRKAR2A/NPRL2/TAF7/PRKRIP1/PINX1/TRIB1/RGS3	22
BP	GO:0030902	hindbrain development	10/891	84/10468	0.175284	0.991216	0.991216	ITGB1/GLI1/LHX5/ALDH1A2/CDK5R1/PSMG1/HES1/SEC24B/UQCRQ/ATP7A	10
BP	GO:0050777	negative regulation of immune response	10/891	84/10468	0.175284	0.991216	0.991216	PSMB4/XCL1/PSMA1/TGFB3/TYRO3/ARRB2/NR1H2/PARP14/BCL6/CNOT7	10
BP	GO:0034644	cellular response to UV	9/891	74/10468	0.175591	0.991216	0.991216	MDM2/NEDD4/ERCC4/N4BP1/RBL2/RPL26/ATF4/BAK1/MYC	9
BP	GO:0001974	blood vessel remodeling	4/891	26/10468	0.175775	0.991216	0.991216	MDM2/EPAS1/BAK1/ATP7A	4
BP	GO:0002762	negative regulation of myeloid leukocyte differentiation	4/891	26/10468	0.175775	0.991216	0.991216	NME1/CDK6/TRIB1/MYC	4
BP	GO:0021536	diencephalon development	4/891	26/10468	0.175775	0.991216	0.991216	GLI1/ALDH1A2/HES1/UQCRQ	4
BP	GO:0042551	neuron maturation	4/891	26/10468	0.175775	0.991216	0.991216	CDKN1C/SPTBN4/FARP2/PICK1	4
BP	GO:0045668	negative regulation of osteoblast differentiation	4/891	26/10468	0.175775	0.991216	0.991216	AXIN2/ID2/CDK6/TMEM64	4
BP	GO:0046466	membrane lipid catabolic process	4/891	26/10468	0.175775	0.991216	0.991216	GBA/SMPD1/MGST2/GM2A	4
BP	GO:0060412	ventricular septum morphogenesis	4/891	26/10468	0.175775	0.991216	0.991216	ID2/HES1/CITED2/ZFPM2	4
BP	GO:0097502	mannosylation	4/891	26/10468	0.175775	0.991216	0.991216	ALG9/SDF2L1/PIGZ/DPY19L1	4
BP	GO:1902751	positive regulation of cell cycle G2/M phase transition	4/891	26/10468	0.175775	0.991216	0.991216	CDC7/DTL/CCND1/ATAD5	4
BP	GO:1904837	beta-catenin-TCF complex assembly	4/891	26/10468	0.175775	0.991216	0.991216	KAT5/BCL9L/AXIN2/MYC	4
BP	GO:0050727	regulation of inflammatory response	20/891	188/10468	0.176428	0.991216	0.991216	PTGER3/PSMB4/GBA/XCL1/CFH/PSMA1/ATM/TYRO3/GPRC5B/SETD6/PHB/CEBPB/TLR9/BCL6/MGST2/OSMR/AGER/MAPK14/IL6/JAK2	20
BP	GO:0000086	G2/M transition of mitotic cell cycle	23/891	220/10468	0.176818	0.991216	0.991216	CDC7/PSMB4/NEK2/DTL/PSMA1/CCND1/ATM/PHLDA1/AJUBA/CCP110/LCMT1/PSMB3/PSMD3/CDC6/PSMF1/BACH1/CEP70/HAUS3/CUL1/PINX1/PCM1/NBN/PSMD5	23
BP	GO:0031056	regulation of histone modification	13/891	115/10468	0.178563	0.991216	0.991216	ATM/SART3/BRD7/KAT7/KMT2B/BCL6/TAF7/JARID2/C6orf89/PAXIP1/UBR5/PHF19/SET	13
BP	GO:0048738	cardiac muscle tissue development	13/891	115/10468	0.178563	0.991216	0.991216	ITGB1/ARID2/GLI1/ALDH1A2/TPM1/MEF2A/ARRB2/IFT20/ID2/TNNC1/JARID2/MAPK14/ZFPM2	13
BP	GO:0002562	somatic diversification of immune receptors via germline recombination within a single locus	6/891	45/10468	0.180509	0.991216	0.991216	ATM/UNG/ATAD5/BCL6/PAXIP1/NBN	6
BP	GO:0016444	somatic cell DNA recombination	6/891	45/10468	0.180509	0.991216	0.991216	ATM/UNG/ATAD5/BCL6/PAXIP1/NBN	6
BP	GO:0035384	thioester biosynthetic process	6/891	45/10468	0.180509	0.991216	0.991216	MPC2/PDPR/PDK2/ACSS2/SLC25A1/ACSL6	6
BP	GO:0038034	signal transduction in absence of ligand	6/891	45/10468	0.180509	0.991216	0.991216	IFI6/EYA3/FADD/BAK1/FOXO3/LCN2	6
BP	GO:0071616	acyl-CoA biosynthetic process	6/891	45/10468	0.180509	0.991216	0.991216	MPC2/PDPR/PDK2/ACSS2/SLC25A1/ACSL6	6
BP	GO:0097192	extrinsic apoptotic signaling pathway in absence of ligand	6/891	45/10468	0.180509	0.991216	0.991216	IFI6/EYA3/FADD/BAK1/FOXO3/LCN2	6
BP	GO:1903829	positive regulation of cellular protein localization	26/891	253/10468	0.181226	0.991216	0.991216	SESN2/EFCAB7/LEPROT/LRIG2/ITGB1/TSG101/STX3/ZPR1/MDM2/CDT1/CDK5R1/KAT7/PDCD5/SAE1/CASP8/CCT8/EDEM1/PDCD10/ICE1/MAPK14/SLC35D3/TOMM7/PINX1/PCM1/YWHAZ/UBR5	26
BP	GO:0016055	Wnt signaling pathway	34/891	340/10468	0.182354	0.991216	0.991216	PTPRU/PSMB4/BAMBI/FAM53B/PSMA1/CCND1/BCL9L/PFDN5/GLI1/GPC6/CALM1/TYRO3/GPRC5B/BRD7/ARRB2/IFT20/PSMB3/PSMD3/AXIN2/TNRC6C/AP2S1/PSMF1/RUNX1/NPHP3/IFT80/CPZ/JADE1/CSNK1A1/MAPK14/FOXO3/CUL1/TMEM64/UBR5/PSMD5	34
BP	GO:0061008	hepaticobiliary system development	11/891	95/10468	0.182982	0.991216	0.991216	ARID5B/CCND1/GLI1/GNPNAT1/ALDH1A2/CEBPB/NPHP3/HES1/JARID2/CITED2/ATP7A	11
BP	GO:0001701	in utero embryonic development	28/891	275/10468	0.183347	0.991216	0.991216	NASP/FOXD3/ELF3/NEK2/ITGB1/CDKN1C/NPAT/ZPR1/TMED2/BRCA2/FUT8/TGFB3/ADAM10/TPM1/PCGF2/ASF1B/EPAS1/CASP8/CEBPB/HES1/SEC24D/MGAT1/RPL7L1/PRDM1/NCAPG2/NBN/ZFPM2/ATP7A	28
BP	GO:0090257	regulation of muscle system process	14/891	126/10468	0.183545	0.991216	0.991216	NOS1AP/TACR2/CAMK2G/CALM1/TPM1/MEF2A/MTMR4/TNNC1/MYL5/JARID2/FOXO3/GTF2IRD2/GTF2IRD2B/SRI	14
BP	GO:0002200	somatic diversification of immune receptors	7/891	55/10468	0.184175	0.991216	0.991216	ATM/UNG/ATAD5/BCL6/PMS2/PAXIP1/NBN	7
BP	GO:1903845	negative regulation of cellular response to transforming growth factor beta stimulus	7/891	55/10468	0.184175	0.991216	0.991216	BAMBI/BCL9L/TGFB3/MTMR4/DAND5/EID2/LTBP1	7
BP	GO:0044773	mitotic DNA damage checkpoint	10/891	85/10468	0.184593	0.991216	0.991216	RAD9A/CCND1/ATM/MDM2/RAD9B/RBL2/RPL26/CNOT4/CNOT7/NBN	10
BP	GO:0071156	regulation of cell cycle arrest	10/891	85/10468	0.184593	0.991216	0.991216	CCND1/ATM/MDM2/RBL2/RPL26/CRLF3/CDK5R1/ID2/CNOT4/CNOT7	10
BP	GO:0090288	negative regulation of cellular response to growth factor stimulus	10/891	85/10468	0.184593	0.991216	0.991216	NBL1/BAMBI/BCL9L/TGFB3/NEDD4/MTMR4/DAND5/EID2/LTBP1/HIPK2	10
BP	GO:0001824	blastocyst development	9/891	75/10468	0.185562	0.991216	0.991216	NASP/ELF3/NEK2/ZPR1/BRCA2/ASF1B/RPL7L1/NCAPG2/NBN	9
BP	GO:0061640	cytoskeleton-dependent cytokinesis	9/891	75/10468	0.185562	0.991216	0.991216	JTB/BRCA2/CKAP2/NUSAP1/CDT1/CHMP6/SPIRE1/KIF20A/EFHC1	9
BP	GO:0003206	cardiac chamber morphogenesis	8/891	65/10468	0.185584	0.991216	0.991216	DHRS3/MDM2/TPM1/ID2/TNNC1/HES1/CITED2/ZFPM2	8
BP	GO:0006024	glycosaminoglycan biosynthetic process	8/891	65/10468	0.185584	0.991216	0.991216	CSGALNACT2/EXT2/GPC6/CHSY1/HS3ST3A1/B3GNT2/GALNT5/PXYLP1	8
BP	GO:0043648	dicarboxylic acid metabolic process	8/891	65/10468	0.185584	0.991216	0.991216	SDHB/ALDH4A1/GLUL/MTHFS/GAD1/SLC7A11/ME1/OGDH	8
BP	GO:0031667	response to nutrient levels	32/891	319/10468	0.186138	0.991216	0.991216	SESN2/RRAGC/BCL10/GBA/XPR1/GLUL/CCND1/SIK2/MDM2/MAP1LC3B2/ALDH1A2/CHSY1/MAP1LC3B/PDK2/WIPI1/SEH1L/ZFP36/FOXA2/AHCY/PICK1/ATF4/ADSL/NPRL2/FNIP1/STC2/CPEB4/FOXO3/MAP3K5/NAMPT/TRIM24/LCN2/SLC27A4	32
BP	GO:0009108	coenzyme biosynthetic process	22/891	211/10468	0.186577	0.991216	0.991216	MPC2/HKDC1/PCBD1/NUP160/PTS/AAAS/GPHN/ADPGK/MTHFS/PDPR/PDK2/SEH1L/ACSS2/SLC25A1/COQ2/ACSL6/PCBD2/OGDH/NAMPT/NUP205/COQ4/SLC2A6	22
BP	GO:0198738	cell-cell signaling by wnt	34/891	341/10468	0.186971	0.991216	0.991216	PTPRU/PSMB4/BAMBI/FAM53B/PSMA1/CCND1/BCL9L/PFDN5/GLI1/GPC6/CALM1/TYRO3/GPRC5B/BRD7/ARRB2/IFT20/PSMB3/PSMD3/AXIN2/TNRC6C/AP2S1/PSMF1/RUNX1/NPHP3/IFT80/CPZ/JADE1/CSNK1A1/MAPK14/FOXO3/CUL1/TMEM64/UBR5/PSMD5	34
BP	GO:0034660	ncRNA metabolic process	46/891	473/10468	0.187114	0.991216	0.991216	MRTO4/TRMT13/WARS2/RPS27/ISG20L2/RRNAD1/POU2F1/DARS2/TRMT1L/INTS7/NVL/HEATR1/ALKBH8/DDX10/YARS2/FAM98B/MTFMT/SNAPC5/IMP3/USB1/PELP1/RPL26/WDR18/SARS2/FBL/MARS2/FAM207A/RPP14/NSUN3/TRMT10A/PPA2/INTS12/GAR1/ICE1/PHAX/RPP21/EEF1E1/RPL7L1/GTF3C6/AIMP2/HNRNPA2B1/TYW1B/NSUN5/METTL2B/POLR1E/RPL35	46
BP	GO:0030166	proteoglycan biosynthetic process	5/891	36/10468	0.187912	0.991216	0.991216	CSGALNACT2/EXT2/CHSY1/HS3ST3A1/PXYLP1	5
BP	GO:0043388	positive regulation of DNA binding	5/891	36/10468	0.187912	0.991216	0.991216	NME1/HES1/HIPK2/PINX1/JAK2	5
BP	GO:0097064	ncRNA export from nucleus	5/891	36/10468	0.187912	0.991216	0.991216	NUP160/AAAS/SEH1L/PHAX/NUP205	5
BP	GO:0071383	cellular response to steroid hormone stimulus	18/891	169/10468	0.190481	0.991216	0.991216	NCOA4/KAT5/ESR2/NEDD4/ARRB2/PHB/ZFP36/NR1H2/ZFP36L2/NRIP1/RUNX1/TAF7/NR3C1/ADTRP/FOXO3/UBR5/JAK2/NR6A1	18
BP	GO:0006401	RNA catabolic process	34/891	342/10468	0.191651	0.991216	0.991216	MRTO4/PSMB4/RPS27/PRPF18/CPEB3/RPL27A/PSMA1/ATM/ZPR1/RPL41/RPL4/RPL26/PSMB3/PSMD3/AXIN2/TNRC6C/ZFP36/RPL13A/RPS11/ZFP36L2/PSMF1/RBM38/RPL3/TTC37/MAPK14/LSM5/CNOT4/CNOT7/RPL30/YWHAZ/SECISBP2/PSMD5/RPL35/SET	34
BP	GO:0007528	neuromuscular junction development	4/891	27/10468	0.19342	0.991216	0.991216	GPHN/NEDD4/AFG3L2/FNTA	4
BP	GO:0010524	positive regulation of calcium ion transport into cytosol	4/891	27/10468	0.19342	0.991216	0.991216	XCL1/CALM1/BAK1/SRI	4
BP	GO:0014888	striated muscle adaptation	4/891	27/10468	0.19342	0.991216	0.991216	CAMK2G/TNNC1/GTF2IRD2/GTF2IRD2B	4
BP	GO:0021695	cerebellar cortex development	4/891	27/10468	0.19342	0.991216	0.991216	GLI1/LHX5/UQCRQ/ATP7A	4
BP	GO:0032613	interleukin-10 production	4/891	27/10468	0.19342	0.991216	0.991216	XCL1/TRIB2/TLR9/AGER	4
BP	GO:0042558	pteridine-containing compound metabolic process	4/891	27/10468	0.19342	0.991216	0.991216	PCBD1/PTS/MTHFS/PCBD2	4
BP	GO:0055025	positive regulation of cardiac muscle tissue development	4/891	27/10468	0.19342	0.991216	0.991216	GLI1/ARRB2/MAPK14/ZFPM2	4
BP	GO:0070198	protein localization to chromosome, telomeric region	4/891	27/10468	0.19342	0.991216	0.991216	BRCA2/XRCC5/CCT8/PINX1	4
BP	GO:1900744	regulation of p38MAPK cascade	4/891	27/10468	0.19342	0.991216	0.991216	PHLPP1/AGER/MAP3K5/MAP3K4	4
BP	GO:2000272	negative regulation of signaling receptor activity	4/891	27/10468	0.19342	0.991216	0.991216	TSG101/ESR2/CHMP6/ZGPAT	4
BP	GO:0006622	protein targeting to lysosome	3/891	18/10468	0.193516	0.991216	0.991216	NCOA4/GNPTAB/NEDD4	3
BP	GO:0042092	type 2 immune response	3/891	18/10468	0.193516	0.991216	0.991216	XCL1/BCL6/IL6	3
BP	GO:0050829	defense response to Gram-negative bacterium	3/891	18/10468	0.193516	0.991216	0.991216	TLR9/IL6/RPL30	3
BP	GO:0060986	endocrine hormone secretion	3/891	18/10468	0.193516	0.991216	0.991216	TACR2/FOXL2/GDF9	3
BP	GO:0071450	cellular response to oxygen radical	3/891	18/10468	0.193516	0.991216	0.991216	ADPRHL2/SOD2/ATP7A	3
BP	GO:0071451	cellular response to superoxide	3/891	18/10468	0.193516	0.991216	0.991216	ADPRHL2/SOD2/ATP7A	3
BP	GO:0090312	positive regulation of protein deacetylation	3/891	18/10468	0.193516	0.991216	0.991216	BCL6/C6orf89/FNTA	3
BP	GO:0090344	negative regulation of cell aging	3/891	18/10468	0.193516	0.991216	0.991216	BCL6/CDK6/NAMPT	3
BP	GO:2000404	regulation of T cell migration	3/891	18/10468	0.193516	0.991216	0.991216	XCL1/FADD/ADAM10	3
BP	GO:0009064	glutamine family amino acid metabolic process	6/891	46/10468	0.193751	0.991216	0.991216	ALDH4A1/GLUL/MTHFS/FAH/GAD1/SLC7A11	6
BP	GO:0032410	negative regulation of transporter activity	6/891	46/10468	0.193751	0.991216	0.991216	CTTNBP2NL/CALM1/NEDD4/TLR9/GOPC/SRI	6
BP	GO:0019751	polyol metabolic process	10/891	86/10468	0.194121	0.991216	0.991216	GBA/PCBD1/CYP2R1/PTS/NUDT4/CALM1/PLCL1/SLC5A3/COQ2/PCBD2	10
BP	GO:0019884	antigen processing and presentation of exogenous antigen	15/891	138/10468	0.195279	0.991216	0.991216	CAPZA1/PSMB4/PSMA1/SEC23A/B2M/PSMB3/PSMD3/AP3D1/AP2S1/PSMF1/SEC31A/SEC24B/SEC24D/DCTN6/PSMD5	15
BP	GO:0001892	embryonic placenta development	7/891	56/10468	0.196186	0.991216	0.991216	CDKN1C/TMED2/EPAS1/CASP8/CEBPB/HES1/PRDM1	7
BP	GO:1902106	negative regulation of leukocyte differentiation	7/891	56/10468	0.196186	0.991216	0.991216	NME1/ID2/RUNX1/BCL6/CDK6/TRIB1/MYC	7
BP	GO:0000288	nuclear-transcribed mRNA catabolic process, deadenylation-dependent decay	8/891	66/10468	0.196611	0.991216	0.991216	CPEB3/TNRC6C/ZFP36/ZFP36L2/TTC37/LSM5/CNOT4/CNOT7	8
BP	GO:0002456	T cell mediated immunity	8/891	66/10468	0.196611	0.991216	0.991216	XCL1/FADD/B2M/IL18R1/AGER/STX7/ULBP2/IL6	8
BP	GO:0002821	positive regulation of adaptive immune response	8/891	66/10468	0.196611	0.991216	0.991216	XCL1/FADD/B2M/ATAD5/IL18R1/STX7/IL6/PAXIP1	8
BP	GO:0007004	telomere maintenance via telomerase	8/891	66/10468	0.196611	0.991216	0.991216	NEK2/ATM/PNKP/XRCC5/CCT8/GAR1/MAP3K4/PINX1	8
BP	GO:0070482	response to oxygen levels	27/891	267/10468	0.198333	0.991216	0.991216	PSMB4/PSMA1/ATM/MDM2/AJUBA/TGFB3/PSMB3/PSMD3/ACTN4/EPAS1/PSMF1/AHCY/BACH1/PICK1/ATF4/ADSL/CPEB2/STC2/CPEB4/AGER/FOXO3/CITED2/NAMPT/HIPK2/MYC/PSMD5/ATP7A	27
BP	GO:0060070	canonical Wnt signaling pathway	22/891	213/10468	0.198599	0.991216	0.991216	PTPRU/PSMB4/BAMBI/FAM53B/PSMA1/BCL9L/PFDN5/GLI1/GPRC5B/IFT20/PSMB3/PSMD3/AXIN2/PSMF1/NPHP3/JADE1/CSNK1A1/MAPK14/FOXO3/TMEM64/UBR5/PSMD5	22
BP	GO:0002699	positive regulation of immune effector process	14/891	128/10468	0.199131	0.991216	0.991216	BCL10/XCL1/FADD/B2M/GPRC5B/ATAD5/PHB/IL18R1/TLR9/MAPK14/STX7/ULBP2/IL6/PAXIP1	14
BP	GO:0003006	developmental process involved in reproduction	37/891	377/10468	0.201285	0.991216	0.991216	NASP/RAB13/NCOA4/ARID5B/CYP17A1/CDKN1C/CCND1/ATM/GLI1/TMED2/BRCA2/TYRO3/ARRB2/KMT2B/EPAS1/CASP8/CEBPB/NRIP1/DMC1/MEI1/FOXL2/TIPARP/HES1/YTHDC2/GDF9/STC2/BAK1/MAPK14/PRDM1/FOXO3/CITED2/MAP3K4/NUDT1/POMZP3/IMMP2L/TTC26/ZFPM2	37
BP	GO:0007611	learning or memory	15/891	139/10468	0.202903	0.991216	0.991216	ITGB1/TACR2/EIF4EBP2/CPEB3/AAAS/MEIS2/B2M/IFT20/KMT2B/CEBPB/SLC7A11/GM2A/AGER/ATXN1/VDAC3	15
BP	GO:0032637	interleukin-8 production	5/891	37/10468	0.203195	0.991216	0.991216	BCL10/CD58/TLR5/FADD/TLR9	5
BP	GO:0042398	cellular modified amino acid biosynthetic process	5/891	37/10468	0.203195	0.991216	0.991216	MTHFS/CNDP2/GGT7/SLC7A11/MGST2	5
BP	GO:0034599	cellular response to oxidative stress	21/891	203/10468	0.203277	0.991216	0.991216	SESN2/SFPQ/ADPRHL2/MDM2/FUT8/TPM1/PCGF2/PDK2/EPAS1/ATF4/PDCD10/CPEB2/SLC7A11/FOXO3/MAP3K5/SOD2/IL6/VKORC1L1/JAK2/LCN2/ATP7A	21
BP	GO:1900180	regulation of protein localization to nucleus	10/891	87/10468	0.20386	0.991216	0.991216	SESN2/EFCAB7/GLUL/NVL/ZPR1/KAT7/CCT8/MAPK14/PINX1/UBR5	10
BP	GO:2000134	negative regulation of G1/S transition of mitotic cell cycle	10/891	87/10468	0.20386	0.991216	0.991216	CCND1/ATM/MDM2/BRD7/RBL2/RPL26/JADE1/CDK6/CNOT4/CNOT7	10
BP	GO:0006486	protein glycosylation	18/891	171/10468	0.204129	0.991216	0.991216	MAN1A2/EDEM3/EXT2/ALG9/DPAGT1/FUT8/MGAT5B/MCFD2/B3GNT2/GALNT5/SDF2L1/TRAK1/ST6GAL1/GALNT10/MGAT1/MAN1A1/DPY19L1/GOLGA2	18
BP	GO:0043413	macromolecule glycosylation	18/891	171/10468	0.204129	0.991216	0.991216	MAN1A2/EDEM3/EXT2/ALG9/DPAGT1/FUT8/MGAT5B/MCFD2/B3GNT2/GALNT5/SDF2L1/TRAK1/ST6GAL1/GALNT10/MGAT1/MAN1A1/DPY19L1/GOLGA2	18
BP	GO:0060249	anatomical structure homeostasis	28/891	279/10468	0.204418	0.991216	0.991216	NEK2/ATM/BBS10/BRCA2/TEP1/RAD51/TYRO3/B2M/ERCC4/RAD51D/PNKP/EPAS1/XRCC5/TP53INP2/CCT8/TLR9/NPHP3/GAR1/SLC22A5/PRIM2/MAP3K4/IL6/HNRNPA2B1/PINX1/NBN/TMEM64/MYC/RECQL4	28
BP	GO:0006637	acyl-CoA metabolic process	9/891	77/10468	0.206223	0.991216	0.991216	MPC2/FAR1/PDPR/PDK2/ACSS2/SLC25A1/LOC344967/ACSL6/OGDH	9
BP	GO:0031145	anaphase-promoting complex-dependent catabolic process	9/891	77/10468	0.206223	0.991216	0.991216	PSMB4/PSMA1/PSMB3/PSMD3/ANAPC1/PSMF1/ANAPC4/CDC26/PSMD5	9
BP	GO:0035383	thioester metabolic process	9/891	77/10468	0.206223	0.991216	0.991216	MPC2/FAR1/PDPR/PDK2/ACSS2/SLC25A1/LOC344967/ACSL6/OGDH	9
BP	GO:0051403	stress-activated MAPK cascade	19/891	182/10468	0.206271	0.991216	0.991216	MAGI3/AIDA/MAP4K5/MAP2K3/PHLPP1/ZFP36/TLR9/PDCD10/MECOM/AGER/MAPK14/MAP3K5/MAP3K4/KLHDC10/HIPK2/CUL1/COPS5/TRIB1/MYC	19
BP	GO:0000338	protein deneddylation	2/891	10/10468	0.206919	0.991216	0.991216	COPS5/TOR1A	2
BP	GO:0001731	formation of translation preinitiation complex	2/891	10/10468	0.206919	0.991216	0.991216	EIF2D/RPL13A	2
BP	GO:0001780	neutrophil homeostasis	2/891	10/10468	0.206919	0.991216	0.991216	SLC7A11/IL6	2
BP	GO:0001963	synaptic transmission, dopaminergic	2/891	10/10468	0.206919	0.991216	0.991216	ARRB2/TOR1A	2
BP	GO:0002029	desensitization of G protein-coupled receptor signaling pathway	2/891	10/10468	0.206919	0.991216	0.991216	ARRB2/DNM1	2
BP	GO:0002693	positive regulation of cellular extravasation	2/891	10/10468	0.206919	0.991216	0.991216	FADD/AGER	2
BP	GO:0006662	glycerol ether metabolic process	2/891	10/10468	0.206919	0.991216	0.991216	FAR1/DHRS7B	2
BP	GO:0007271	synaptic transmission, cholinergic	2/891	10/10468	0.206919	0.991216	0.991216	TACR2/ACHE	2
BP	GO:0009313	oligosaccharide catabolic process	2/891	10/10468	0.206919	0.991216	0.991216	MAN2C1/GM2A	2
BP	GO:0010715	regulation of extracellular matrix disassembly	2/891	10/10468	0.206919	0.991216	0.991216	CLASP2/IL6	2
BP	GO:0010842	retina layer formation	2/891	10/10468	0.206919	0.991216	0.991216	FJX1/HIPK2	2
BP	GO:0010934	macrophage cytokine production	2/891	10/10468	0.206919	0.991216	0.991216	TGFB3/GPRC5B	2
BP	GO:0016339	calcium-dependent cell-cell adhesion via plasma membrane cell adhesion molecules	2/891	10/10468	0.206919	0.991216	0.991216	AJUBA/CDH15	2
BP	GO:0021533	cell differentiation in hindbrain	2/891	10/10468	0.206919	0.991216	0.991216	LHX5/ATP7A	2
BP	GO:0022401	negative adaptation of signaling pathway	2/891	10/10468	0.206919	0.991216	0.991216	ARRB2/DNM1	2
BP	GO:0023058	adaptation of signaling pathway	2/891	10/10468	0.206919	0.991216	0.991216	ARRB2/DNM1	2
BP	GO:0033622	integrin activation	2/891	10/10468	0.206919	0.991216	0.991216	PIEZO1/FARP2	2
BP	GO:0042023	DNA endoreduplication	2/891	10/10468	0.206919	0.991216	0.991216	SMC3/ZPR1	2
BP	GO:0042249	establishment of planar polarity of embryonic epithelium	2/891	10/10468	0.206919	0.991216	0.991216	NPHP3/SEC24B	2
BP	GO:0046033	AMP metabolic process	2/891	10/10468	0.206919	0.991216	0.991216	APRT/ADSL	2
BP	GO:0048715	negative regulation of oligodendrocyte differentiation	2/891	10/10468	0.206919	0.991216	0.991216	ID2/HES1	2
BP	GO:0051280	negative regulation of release of sequestered calcium ion into cytosol	2/891	10/10468	0.206919	0.991216	0.991216	CALM1/SRI	2
BP	GO:0051284	positive regulation of sequestering of calcium ion	2/891	10/10468	0.206919	0.991216	0.991216	CALM1/SRI	2
BP	GO:0070816	phosphorylation of RNA polymerase II C-terminal domain	2/891	10/10468	0.206919	0.991216	0.991216	GTF2H1/PPIL4	2
BP	GO:0070863	positive regulation of protein exit from endoplasmic reticulum	2/891	10/10468	0.206919	0.991216	0.991216	EDEM1/SLC35D3	2
BP	GO:0072574	hepatocyte proliferation	2/891	10/10468	0.206919	0.991216	0.991216	GLI1/CEBPB	2
BP	GO:0072575	epithelial cell proliferation involved in liver morphogenesis	2/891	10/10468	0.206919	0.991216	0.991216	GLI1/CEBPB	2
BP	GO:1900409	positive regulation of cellular response to oxidative stress	2/891	10/10468	0.206919	0.991216	0.991216	SFPQ/FOXO3	2
BP	GO:1901741	positive regulation of myoblast fusion	2/891	10/10468	0.206919	0.991216	0.991216	EHD2/MAPK14	2
BP	GO:1902101	positive regulation of metaphase/anaphase transition of cell cycle	2/891	10/10468	0.206919	0.991216	0.991216	CDT1/ANAPC4	2
BP	GO:1902884	positive regulation of response to oxidative stress	2/891	10/10468	0.206919	0.991216	0.991216	SFPQ/FOXO3	2
BP	GO:1903209	positive regulation of oxidative stress-induced cell death	2/891	10/10468	0.206919	0.991216	0.991216	SFPQ/FOXO3	2
BP	GO:1990440	positive regulation of transcription from RNA polymerase II promoter in response to endoplasmic reticulum stress	2/891	10/10468	0.206919	0.991216	0.991216	CEBPB/ATF4	2
BP	GO:2000194	regulation of female gonad development	2/891	10/10468	0.206919	0.991216	0.991216	GDF9/ZFPM2	2
BP	GO:2001185	regulation of CD8-positive, alpha-beta T cell activation	2/891	10/10468	0.206919	0.991216	0.991216	XCL1/RUNX1	2
BP	GO:0043401	steroid hormone mediated signaling pathway	14/891	129/10468	0.207146	0.991216	0.991216	NCOA4/KAT5/ESR2/NEDD4/ARRB2/PHB/NR1H2/NRIP1/RUNX1/TAF7/NR3C1/UBR5/JAK2/NR6A1	14
BP	GO:0007062	sister chromatid cohesion	6/891	47/10468	0.207346	0.991216	0.991216	SFPQ/SMC3/AXIN2/STAG1/PDS5A/BOD1	6
BP	GO:0016445	somatic diversification of immunoglobulins	6/891	47/10468	0.207346	0.991216	0.991216	UNG/ATAD5/BCL6/PMS2/PAXIP1/NBN	6
BP	GO:0042102	positive regulation of T cell proliferation	6/891	47/10468	0.207346	0.991216	0.991216	XCL1/FADD/HES1/AGER/IL6/EFNB1	6
BP	GO:0060333	interferon-gamma-mediated signaling pathway	6/891	47/10468	0.207346	0.991216	0.991216	CAMK2G/B2M/NR1H2/PARP14/TXK/JAK2	6
BP	GO:0000281	mitotic cytokinesis	8/891	67/10468	0.207899	0.991216	0.991216	JTB/BRCA2/CKAP2/NUSAP1/CDT1/CHMP6/KIF20A/EFHC1	8
BP	GO:0050729	positive regulation of inflammatory response	8/891	67/10468	0.207899	0.991216	0.991216	PTGER3/GPRC5B/CEBPB/TLR9/MGST2/OSMR/IL6/JAK2	8
BP	GO:0051306	mitotic sister chromatid separation	7/891	57/10468	0.208497	0.991216	0.991216	ATM/LCMT1/CDT1/CDC6/ANAPC1/ANAPC4/CDC26	7
BP	GO:0031098	stress-activated protein kinase signaling cascade	21/891	204/10468	0.209665	0.991216	0.991216	MAGI3/AIDA/MAP4K5/MAP2K3/KAT7/PHLPP1/ZFP36/TLR9/PDCD10/MECOM/STK10/AGER/MAPK14/MAP3K5/MAP3K4/KLHDC10/HIPK2/CUL1/COPS5/TRIB1/MYC	21
BP	GO:0034605	cellular response to heat	11/891	98/10468	0.210368	0.991216	0.991216	IER5/CAMK2G/NUP160/CLPB/ATM/AAAS/SEH1L/AKT1S1/HSPA13/HSPA9/NUP205	11
BP	GO:0002449	lymphocyte mediated immunity	15/891	140/10468	0.210661	0.991216	0.991216	BCL10/XCL1/FADD/UNG/B2M/ARRB2/ATAD5/IL18R1/BCL6/AGER/STX7/ULBP2/IL6/PAXIP1/NBN	15
BP	GO:2000146	negative regulation of cell motility	15/891	140/10468	0.210661	0.991216	0.991216	NBL1/PTPRU/ARID2/SPRED1/TPM1/CLASP2/NISCH/PDCD10/ADTRP/FOXO3/CITED2/KRIT1/TRIB1/SCAI/RAP2C	15
BP	GO:0030225	macrophage differentiation	4/891	28/10468	0.211583	0.991216	0.991216	FADD/ID2/CASP8/TRIB1	4
BP	GO:0031111	negative regulation of microtubule polymerization or depolymerization	4/891	28/10468	0.211583	0.991216	0.991216	CKAP2/EML2/SPEF1/CLASP2	4
BP	GO:0032729	positive regulation of interferon-gamma production	4/891	28/10468	0.211583	0.991216	0.991216	FADD/IL18R1/TLR9/TXK	4
BP	GO:0033014	tetrapyrrole biosynthetic process	4/891	28/10468	0.211583	0.991216	0.991216	UROD/RSAD1/SLC25A38/CPOX	4
BP	GO:1901658	glycosyl compound catabolic process	4/891	28/10468	0.211583	0.991216	0.991216	GBA/HDDC3/AHCY/FUCA2	4
BP	GO:1902229	regulation of intrinsic apoptotic signaling pathway in response to DNA damage	4/891	28/10468	0.211583	0.991216	0.991216	RAD9A/DDIAS/RPL26/ATAD5	4
BP	GO:1904031	positive regulation of cyclin-dependent protein kinase activity	4/891	28/10468	0.211583	0.991216	0.991216	CCND1/CCND2/CDK5R1/CDC6	4
BP	GO:0009566	fertilization	10/891	88/10468	0.213801	0.991216	0.991216	UBE2Q1/IGSF8/AAAS/MFGE8/CATSPERG/SPTBN4/CCT8/FOXL2/SLC9B1/POMZP3	10
BP	GO:0007178	transmembrane receptor protein serine/threonine kinase signaling pathway	20/891	194/10468	0.214744	0.991216	0.991216	NBL1/BAMBI/CDKN1C/BCL9L/GDF11/FUT8/TGFB3/RNF111/ARRB2/MTMR4/DAND5/EID2/LTBP1/HES1/GDF9/HIVEP1/MAPK14/CITED2/HIPK2/FNTA	20
BP	GO:0051650	establishment of vesicle localization	21/891	205/10468	0.216147	0.991216	0.991216	STX3/RAP1B/TMED2/SEC23A/VPS18/GOSR1/WIPI1/AP3D1/PIP5K1C/ACTN4/MCFD2/CLASP2/TRAK1/SEC31A/SEC24B/SEC24D/AP3S1/AP3M2/DNM1/GOLGA2/TOR1A	21
BP	GO:0005980	glycogen catabolic process	3/891	19/10468	0.216256	0.991216	0.991216	CALM1/PHKB/PPP1R3B	3
BP	GO:0007026	negative regulation of microtubule depolymerization	3/891	19/10468	0.216256	0.991216	0.991216	CKAP2/SPEF1/CLASP2	3
BP	GO:0007176	regulation of epidermal growth factor-activated receptor activity	3/891	19/10468	0.216256	0.991216	0.991216	TSG101/CHMP6/ZGPAT	3
BP	GO:0008038	neuron recognition	3/891	19/10468	0.216256	0.991216	0.991216	ROBO3/CDK5R1/YWHAZ	3
BP	GO:0009072	aromatic amino acid family metabolic process	3/891	19/10468	0.216256	0.991216	0.991216	PCBD1/FAH/ATP7A	3
BP	GO:0009251	glucan catabolic process	3/891	19/10468	0.216256	0.991216	0.991216	CALM1/PHKB/PPP1R3B	3
BP	GO:0030150	protein import into mitochondrial matrix	3/891	19/10468	0.216256	0.991216	0.991216	TIMM21/TIMM44/TOMM7	3
BP	GO:0034472	snRNA 3'-end processing	3/891	19/10468	0.216256	0.991216	0.991216	INTS7/USB1/INTS12	3
BP	GO:0048147	negative regulation of fibroblast proliferation	3/891	19/10468	0.216256	0.991216	0.991216	C1QL4/MED31/MYC	3
BP	GO:0051383	kinetochore organization	3/891	19/10468	0.216256	0.991216	0.991216	CDT1/SMC4/CENPC	3
BP	GO:0097421	liver regeneration	3/891	19/10468	0.216256	0.991216	0.991216	CCND1/GLI1/CEBPB	3
BP	GO:1900745	positive regulation of p38MAPK cascade	3/891	19/10468	0.216256	0.991216	0.991216	AGER/MAP3K5/MAP3K4	3
BP	GO:1904707	positive regulation of vascular smooth muscle cell proliferation	3/891	19/10468	0.216256	0.991216	0.991216	MDM2/MAP3K5/JAK2	3
BP	GO:0002705	positive regulation of leukocyte mediated immunity	9/891	78/10468	0.216891	0.991216	0.991216	XCL1/FADD/B2M/ATAD5/IL18R1/STX7/ULBP2/IL6/PAXIP1	9
BP	GO:0045785	positive regulation of cell adhesion	22/891	216/10468	0.217326	0.991216	0.991216	PTPRU/BCL10/XCL1/STX3/FADD/ATM/TPM1/PIEZO1/AP3D1/FOXA2/RUNX1/GRAP2/BCL6/HES1/EGFLAM/AGER/CITED2/IL6/CDK6/JAK2/NINJ1/EFNB1	22
BP	GO:0006066	alcohol metabolic process	23/891	227/10468	0.218308	0.991216	0.991216	DHRS3/LEPR/GBA/HSD17B7/PCBD1/SMPD1/CYP2R1/PTS/DPAGT1/NUDT4/CALM1/ALDH1A2/GDE1/SULT1A1/HSD3B7/GDPD1/PLCL1/ACSS2/SLC5A3/COQ2/PCBD2/CYP51A1/SQLE	23
BP	GO:0016447	somatic recombination of immunoglobulin gene segments	5/891	38/10468	0.218874	0.991216	0.991216	UNG/ATAD5/BCL6/PAXIP1/NBN	5
BP	GO:0040014	regulation of multicellular organism growth	5/891	38/10468	0.218874	0.991216	0.991216	SOCS2/RAI1/AFG3L2/SPTBN4/STC2	5
BP	GO:0042149	cellular response to glucose starvation	5/891	38/10468	0.218874	0.991216	0.991216	SESN2/SIK2/PICK1/ATF4/CPEB4	5
BP	GO:0043392	negative regulation of DNA binding	5/891	38/10468	0.218874	0.991216	0.991216	NEK2/ERCC4/ID2/SRI/JAK2	5
BP	GO:0000422	autophagy of mitochondrion	8/891	68/10468	0.219433	0.991216	0.991216	HAX1/GBA/ATG2A/MAP1LC3B2/MAP1LC3B/WIPI1/ATG12/TOMM7	8
BP	GO:0006023	aminoglycan biosynthetic process	8/891	68/10468	0.219433	0.991216	0.991216	CSGALNACT2/EXT2/GPC6/CHSY1/HS3ST3A1/B3GNT2/GALNT5/PXYLP1	8
BP	GO:0032465	regulation of cytokinesis	8/891	68/10468	0.219433	0.991216	0.991216	CDC14A/AHCTF1/BRCA2/CALM1/CCP110/CDC6/KIF20A/CSPP1	8
BP	GO:0061726	mitochondrion disassembly	8/891	68/10468	0.219433	0.991216	0.991216	HAX1/GBA/ATG2A/MAP1LC3B2/MAP1LC3B/WIPI1/ATG12/TOMM7	8
BP	GO:1900034	regulation of cellular response to heat	8/891	68/10468	0.219433	0.991216	0.991216	IER5/CAMK2G/NUP160/ATM/AAAS/SEH1L/AKT1S1/NUP205	8
BP	GO:0032259	methylation	27/891	271/10468	0.22069	0.991216	0.991216	TRMT13/RRNAD1/TRMT1L/COMTD1/PRMT3/ALKBH8/BTG1/FAM98B/LCMT1/SETD6/KMT2B/FBL/AHCY/TRMT2A/PICK1/RBM15B/NSUN3/MECOM/TRMT10A/SETD9/JARID2/PRDM1/NSUN5/METTL2B/PAXIP1/MYC/PHF19	27
BP	GO:0031571	mitotic G1 DNA damage checkpoint	7/891	58/10468	0.221087	0.991216	0.991216	CCND1/ATM/MDM2/RBL2/RPL26/CNOT4/CNOT7	7
BP	GO:0034754	cellular hormone metabolic process	7/891	58/10468	0.221087	0.991216	0.991216	DHRS3/HSD17B7/CYP17A1/HSD17B6/ALDH1A2/SULT1A1/TIPARP	7
BP	GO:0035710	CD4-positive, alpha-beta T cell activation	7/891	58/10468	0.221087	0.991216	0.991216	XCL1/IL18R1/RUNX1/BCL6/AGER/IL6/ATP7A	7
BP	GO:0044819	mitotic G1/S transition checkpoint	7/891	58/10468	0.221087	0.991216	0.991216	CCND1/ATM/MDM2/RBL2/RPL26/CNOT4/CNOT7	7
BP	GO:0048207	vesicle targeting, rough ER to cis-Golgi	7/891	58/10468	0.221087	0.991216	0.991216	TMED2/SEC23A/MCFD2/SEC31A/SEC24B/SEC24D/GOLGA2	7
BP	GO:0048208	COPII vesicle coating	7/891	58/10468	0.221087	0.991216	0.991216	TMED2/SEC23A/MCFD2/SEC31A/SEC24B/SEC24D/GOLGA2	7
BP	GO:1905818	regulation of chromosome separation	7/891	58/10468	0.221087	0.991216	0.991216	ATM/LCMT1/CDT1/CDC6/ANAPC1/ANAPC4/CDC26	7
BP	GO:0090277	positive regulation of peptide hormone secretion	6/891	48/10468	0.221268	0.991216	0.991216	MPC2/GLUL/MCU/C2CD2L/SRI/JAK2	6
BP	GO:1902110	positive regulation of mitochondrial membrane permeability involved in apoptotic process	6/891	48/10468	0.221268	0.991216	0.991216	STPG1/RHOT2/CASP8/BAK1/TMEM14A/YWHAZ	6
BP	GO:0019083	viral transcription	17/891	163/10468	0.223536	0.991216	0.991216	RPS27/RPL27A/NUP160/AAAS/RPL41/RPL4/RPL26/SEH1L/ZFP36/SUPT5H/RPL13A/RPS11/RPL3/ZNF639/NUP205/RPL30/RPL35	17
BP	GO:0036503	ERAD pathway	10/891	89/10468	0.223934	0.991216	0.991216	FBXO2/FBXO44/EDEM3/OS9/JKAMP/HSPA13/USP25/SDF2L1/EDEM1/TOR1A	10
BP	GO:1902807	negative regulation of cell cycle G1/S phase transition	10/891	89/10468	0.223934	0.991216	0.991216	CCND1/ATM/MDM2/BRD7/RBL2/RPL26/JADE1/CDK6/CNOT4/CNOT7	10
BP	GO:0051302	regulation of cell division	12/891	110/10468	0.224765	0.991216	0.991216	CDC14A/AHCTF1/BRCA2/TGFB3/CALM1/CCP110/RBL2/CDC6/KIF20A/EFHC1/CSPP1/MYC	12
BP	GO:0003007	heart morphogenesis	15/891	142/10468	0.226567	0.991216	0.991216	DHRS3/SYNPO2L/ARID2/MDM2/TMED2/ALDH1A2/TPM1/AXIN2/ID2/TNNC1/NPHP3/HES1/SEC24B/CITED2/ZFPM2	15
BP	GO:0030183	B cell differentiation	9/891	79/10468	0.22777	0.991216	0.991216	IRF2BP2/ITGB1/ATM/ID2/ZFP36L2/TLR9/BCL6/FNIP1/BAK1	9
BP	GO:0098609	cell-cell adhesion	38/891	394/10468	0.229457	0.991216	0.991216	PTPRU/PTPRF/BCL10/CD58/XCL1/ITGB1/FADD/ROBO3/VEZT/SELPLG/AJUBA/TYRO3/PIEZO1/CDH15/CDK5R1/MYL12A/AP3D1/PIP5K1C/FOXA2/CEBPB/RUNX1/GRAP2/BCL6/HES1/SLC7A11/FAT1/PCDHGA1/PCDHGA2/STK10/AGER/ADTRP/MAPK14/CD164/CITED2/IL6/JAK2/EFNB1/DLG3	38
BP	GO:0006084	acetyl-CoA metabolic process	4/891	29/10468	0.230198	0.991216	0.991216	MPC2/PDPR/PDK2/ACSS2	4
BP	GO:0006891	intra-Golgi vesicle-mediated transport	4/891	29/10468	0.230198	0.991216	0.991216	GOSR1/COG1/COPG1/CUX1	4
BP	GO:0042307	positive regulation of protein import into nucleus	4/891	29/10468	0.230198	0.991216	0.991216	EFCAB7/ZPR1/MAPK14/UBR5	4
BP	GO:0048255	mRNA stabilization	4/891	29/10468	0.230198	0.991216	0.991216	AXIN2/ZFP36/RBM38/MAPK14	4
BP	GO:0048538	thymus development	4/891	29/10468	0.230198	0.991216	0.991216	FADD/ATM/HES1/JARID2	4
BP	GO:1901985	positive regulation of protein acetylation	4/891	29/10468	0.230198	0.991216	0.991216	KAT5/BRD7/KAT7/PAXIP1	4
BP	GO:1903955	positive regulation of protein targeting to mitochondrion	4/891	29/10468	0.230198	0.991216	0.991216	LEPROT/PDCD5/SAE1/TOMM7	4
BP	GO:1902105	regulation of leukocyte differentiation	17/891	164/10468	0.231063	0.991216	0.991216	HAX1/FADD/NME1/AP3D1/ID2/ZFP36L2/CASP8/CEBPB/RUNX1/TLR9/BCL6/AGER/PRDM1/CDK6/TMEM64/TRIB1/MYC	17
BP	GO:0055123	digestive system development	8/891	69/10468	0.231199	0.991216	0.991216	CDKN1C/GLI1/TGFB3/ALDH1A2/ID2/NPHP3/HES1/PRDM1	8
BP	GO:0032963	collagen metabolic process	7/891	59/10468	0.233938	0.991216	0.991216	ITGB1/MMP17/TGFB3/MMP15/ARRB2/TNXB/IL6	7
BP	GO:0044783	G1 DNA damage checkpoint	7/891	59/10468	0.233938	0.991216	0.991216	CCND1/ATM/MDM2/RBL2/RPL26/CNOT4/CNOT7	7
BP	GO:0043280	positive regulation of cysteine-type endopeptidase activity involved in apoptotic process	10/891	90/10468	0.234251	0.991216	0.991216	BCL10/FADD/PDCD5/CASP10/CASP8/FOXL2/BAK1/MAP3K5/MYC/JAK2	10
BP	GO:0009743	response to carbohydrate	15/891	143/10468	0.234705	0.991216	0.991216	SESN2/MPC2/GLUL/C2CD2L/RAP1B/CDT1/KAT7/NME1/FOXA2/TRA2B/AGER/ME1/FOXO3/SRI/NAMPT	15
BP	GO:0009755	hormone-mediated signaling pathway	15/891	143/10468	0.234705	0.991216	0.991216	NCOA4/KAT5/PRCP/ESR2/NEDD4/ARRB2/PHB/NR1H2/NRIP1/RUNX1/TAF7/NR3C1/UBR5/JAK2/NR6A1	15
BP	GO:0032413	negative regulation of ion transmembrane transporter activity	5/891	39/10468	0.234909	0.991216	0.991216	CALM1/NEDD4/TLR9/GOPC/SRI	5
BP	GO:0035019	somatic stem cell population maintenance	5/891	39/10468	0.234909	0.991216	0.991216	FOXD3/VPS72/BCL9L/ZFP36L2/HES1	5
BP	GO:0044743	protein transmembrane import into intracellular organelle	5/891	39/10468	0.234909	0.991216	0.991216	LONP2/TIMM21/TIMM44/CHCHD4/TOMM7	5
BP	GO:0048008	platelet-derived growth factor receptor signaling pathway	5/891	39/10468	0.234909	0.991216	0.991216	LRIG2/ARID5B/IFT20/TIPARP/JAK2	5
BP	GO:0048661	positive regulation of smooth muscle cell proliferation	6/891	49/10468	0.235489	0.991216	0.991216	MDM2/ID2/MAP3K5/IL6/NAMPT/JAK2	6
BP	GO:1901799	negative regulation of proteasomal protein catabolic process	6/891	49/10468	0.235489	0.991216	0.991216	OS9/N4BP1/TLK2/PSMF1/USP25/RYBP	6
BP	GO:0043414	macromolecule methylation	23/891	230/10468	0.237374	0.991216	0.991216	TRMT13/RRNAD1/TRMT1L/PRMT3/ALKBH8/BTG1/FAM98B/LCMT1/SETD6/KMT2B/FBL/TRMT2A/PICK1/RBM15B/NSUN3/MECOM/TRMT10A/JARID2/NSUN5/METTL2B/PAXIP1/MYC/PHF19	23
BP	GO:0048863	stem cell differentiation	17/891	165/10468	0.238696	0.991216	0.991216	PSMB4/PSMA1/TCF12/ALDH1A2/SETD6/PSMB3/PSMD3/ZFP36L2/XRCC5/PSMF1/RUNX1/HES1/HSPA9/JARID2/CDK6/PSMD5/EFNB1	17
BP	GO:0007569	cell aging	9/891	80/10468	0.238847	0.991216	0.991216	ATM/BRCA2/B2M/ID2/BCL6/EEF1E1/MAPK14/CDK6/NAMPT	9
BP	GO:0000727	double-strand break repair via break-induced replication	2/891	11/10468	0.239463	0.991216	0.991216	CDC7/CDC45	2
BP	GO:0001682	tRNA 5'-leader removal	2/891	11/10468	0.239463	0.991216	0.991216	RPP14/RPP21	2
BP	GO:0002076	osteoblast development	2/891	11/10468	0.239463	0.991216	0.991216	PTHLH/ACHE	2
BP	GO:0002089	lens morphogenesis in camera-type eye	2/891	11/10468	0.239463	0.991216	0.991216	HIPK2/TDRD7	2
BP	GO:0002507	tolerance induction	2/891	11/10468	0.239463	0.991216	0.991216	PHLPP1/CCR4	2
BP	GO:0006004	fucose metabolic process	2/891	11/10468	0.239463	0.991216	0.991216	FUT8/FUCA2	2
BP	GO:0006054	N-acetylneuraminate metabolic process	2/891	11/10468	0.239463	0.991216	0.991216	NPL/ST6GAL1	2
BP	GO:0006241	CTP biosynthetic process	2/891	11/10468	0.239463	0.991216	0.991216	NME1/UCKL1	2
BP	GO:0006684	sphingomyelin metabolic process	2/891	11/10468	0.239463	0.991216	0.991216	SGMS1/SMPD1	2
BP	GO:0006691	leukotriene metabolic process	2/891	11/10468	0.239463	0.991216	0.991216	GGT7/MGST2	2
BP	GO:0009650	UV protection	2/891	11/10468	0.239463	0.991216	0.991216	ERCC5/ERCC4	2
BP	GO:0010669	epithelial structure maintenance	2/891	11/10468	0.239463	0.991216	0.991216	TLR9/SLC22A5	2
BP	GO:0010818	T cell chemotaxis	2/891	11/10468	0.239463	0.991216	0.991216	XCL1/ADAM10	2
BP	GO:0021884	forebrain neuron development	2/891	11/10468	0.239463	0.991216	0.991216	UQCRQ/ATP7A	2
BP	GO:0033599	regulation of mammary gland epithelial cell proliferation	2/891	11/10468	0.239463	0.991216	0.991216	CCND1/BRCA2	2
BP	GO:0034982	mitochondrial protein processing	2/891	11/10468	0.239463	0.991216	0.991216	AFG3L2/IMMP2L	2
BP	GO:0035721	intraciliary retrograde transport	2/891	11/10468	0.239463	0.991216	0.991216	IFT43/ICK	2
BP	GO:0036037	CD8-positive, alpha-beta T cell activation	2/891	11/10468	0.239463	0.991216	0.991216	XCL1/RUNX1	2
BP	GO:0042104	positive regulation of activated T cell proliferation	2/891	11/10468	0.239463	0.991216	0.991216	FADD/AGER	2
BP	GO:0043173	nucleotide salvage	2/891	11/10468	0.239463	0.991216	0.991216	APRT/UCKL1	2
BP	GO:0045475	locomotor rhythm	2/891	11/10468	0.239463	0.991216	0.991216	ID2/NCOA2	2
BP	GO:0046036	CTP metabolic process	2/891	11/10468	0.239463	0.991216	0.991216	NME1/UCKL1	2
BP	GO:0046501	protoporphyrinogen IX metabolic process	2/891	11/10468	0.239463	0.991216	0.991216	UROD/CPOX	2
BP	GO:0048799	animal organ maturation	2/891	11/10468	0.239463	0.991216	0.991216	ALDH1A2/PLXNB1	2
BP	GO:0051004	regulation of lipoprotein lipase activity	2/891	11/10468	0.239463	0.991216	0.991216	SORT1/NR1H2	2
BP	GO:0071712	ER-associated misfolded protein catabolic process	2/891	11/10468	0.239463	0.991216	0.991216	SDF2L1/TOR1A	2
BP	GO:0072425	signal transduction involved in G2 DNA damage checkpoint	2/891	11/10468	0.239463	0.991216	0.991216	DTL/ATM	2
BP	GO:0072576	liver morphogenesis	2/891	11/10468	0.239463	0.991216	0.991216	GLI1/CEBPB	2
BP	GO:0150077	regulation of neuroinflammatory response	2/891	11/10468	0.239463	0.991216	0.991216	ATM/IL6	2
BP	GO:1901739	regulation of myoblast fusion	2/891	11/10468	0.239463	0.991216	0.991216	EHD2/MAPK14	2
BP	GO:1903624	regulation of DNA catabolic process	2/891	11/10468	0.239463	0.991216	0.991216	ATM/IL6	2
BP	GO:1904925	positive regulation of autophagy of mitochondrion in response to mitochondrial depolarization	2/891	11/10468	0.239463	0.991216	0.991216	GBA/TOMM7	2
BP	GO:1905276	regulation of epithelial tube formation	2/891	11/10468	0.239463	0.991216	0.991216	NPHP3/SEC24B	2
BP	GO:1905820	positive regulation of chromosome separation	2/891	11/10468	0.239463	0.991216	0.991216	CDT1/ANAPC4	2
BP	GO:1990000	amyloid fibril formation	2/891	11/10468	0.239463	0.991216	0.991216	MDM2/B2M	2
BP	GO:2000009	negative regulation of protein localization to cell surface	2/891	11/10468	0.239463	0.991216	0.991216	LEPROT/GOPC	2
BP	GO:2000047	regulation of cell-cell adhesion mediated by cadherin	2/891	11/10468	0.239463	0.991216	0.991216	PTPRU/FOXA2	2
BP	GO:2000050	regulation of non-canonical Wnt signaling pathway	2/891	11/10468	0.239463	0.991216	0.991216	NPHP3/IFT80	2
BP	GO:0019953	sexual reproduction	44/891	463/10468	0.239474	0.991216	0.991216	AZIN2/TESK2/LEPR/UBE2Q1/IGSF8/DEDD/ITGB1/HERC4/MICALCL/ATM/AAAS/GLI1/BTG1/BRCA2/TYRO3/ADAM10/MFGE8/IFT20/SPIRE1/ASF1B/KMT2B/CATSPERG/SPTBN4/NRIP1/CCT8/PICK1/DMC1/MEI1/CRTAP/FOXL2/BCL6/SLC9B1/YTHDC2/GDF9/UBR2/PRDM1/FOXO3/USP42/HERPUD2/POMZP3/IMMP2L/TTC26/TDRD7/NR6A1	44
BP	GO:0000272	polysaccharide catabolic process	3/891	20/10468	0.23951	0.991216	0.991216	CALM1/PHKB/PPP1R3B	3
BP	GO:0000303	response to superoxide	3/891	20/10468	0.23951	0.991216	0.991216	ADPRHL2/SOD2/ATP7A	3
BP	GO:0000729	DNA double-strand break processing	3/891	20/10468	0.23951	0.991216	0.991216	KAT5/ATM/NBN	3
BP	GO:0001504	neurotransmitter uptake	3/891	20/10468	0.23951	0.991216	0.991216	GLUL/SLC7A11/TOR1A	3
BP	GO:0002707	negative regulation of lymphocyte mediated immunity	3/891	20/10468	0.23951	0.991216	0.991216	XCL1/ARRB2/BCL6	3
BP	GO:0006293	nucleotide-excision repair, preincision complex stabilization	3/891	20/10468	0.23951	0.991216	0.991216	GTF2H1/ERCC5/ERCC4	3
BP	GO:0006295	nucleotide-excision repair, DNA incision, 3'-to lesion	3/891	20/10468	0.23951	0.991216	0.991216	GTF2H1/ERCC5/ERCC4	3
BP	GO:0009154	purine ribonucleotide catabolic process	3/891	20/10468	0.23951	0.991216	0.991216	NUDT4/HDDC3/HINT1	3
BP	GO:0010499	proteasomal ubiquitin-independent protein catabolic process	3/891	20/10468	0.23951	0.991216	0.991216	PSMB4/PSMA1/PSMB3	3
BP	GO:0014002	astrocyte development	3/891	20/10468	0.23951	0.991216	0.991216	AGER/IL6/CDK6	3
BP	GO:0018200	peptidyl-glutamic acid modification	3/891	20/10468	0.23951	0.991216	0.991216	CFAP20/GGCX/VKORC1L1	3
BP	GO:0035774	positive regulation of insulin secretion involved in cellular response to glucose stimulus	3/891	20/10468	0.23951	0.991216	0.991216	MPC2/C2CD2L/SRI	3
BP	GO:0042036	negative regulation of cytokine biosynthetic process	3/891	20/10468	0.23951	0.991216	0.991216	ZFP36/TRIB2/IL6	3
BP	GO:0044247	cellular polysaccharide catabolic process	3/891	20/10468	0.23951	0.991216	0.991216	CALM1/PHKB/PPP1R3B	3
BP	GO:0045577	regulation of B cell differentiation	3/891	20/10468	0.23951	0.991216	0.991216	ID2/ZFP36L2/TLR9	3
BP	GO:0048011	neurotrophin TRK receptor signaling pathway	3/891	20/10468	0.23951	0.991216	0.991216	SORT1/AKT1S1/TMEM108	3
BP	GO:0050869	negative regulation of B cell activation	3/891	20/10468	0.23951	0.991216	0.991216	ATM/ID2/BCL6	3
BP	GO:0070306	lens fiber cell differentiation	3/891	20/10468	0.23951	0.991216	0.991216	CDKN1C/SLC7A11/TDRD7	3
BP	GO:2000515	negative regulation of CD4-positive, alpha-beta T cell activation	3/891	20/10468	0.23951	0.991216	0.991216	XCL1/RUNX1/BCL6	3
BP	GO:0045596	negative regulation of cell differentiation	37/891	385/10468	0.239925	0.991216	0.991216	SORT1/LRIG2/ITGB1/CCND1/PTHLH/C1QL4/GDF11/MDM2/KLF13/MEIS2/B2M/CDK5R1/NME1/AXIN2/ACTN4/ZFP36/NR1H2/ID2/TRIB2/ZFP36L2/FOXA2/RUNX1/NPHP3/BCL6/HES1/MED28/HSPA9/MYLIP/FOXO3/IL6/CDK6/NCAPG2/PCM1/TMEM64/ZFPM2/TRIB1/MYC	37
BP	GO:0033157	regulation of intracellular protein transport	18/891	176/10468	0.240153	0.991216	0.991216	EFCAB7/LEPROT/HAX1/ZPR1/OS9/MDM2/CDK5R1/PDCD5/SAE1/EDEM1/PDCD10/PARL/ICE1/MAPK14/SLC35D3/TOMM7/PCM1/UBR5	18
BP	GO:0009991	response to extracellular stimulus	33/891	341/10468	0.242201	0.991216	0.991216	SESN2/RRAGC/BCL10/GBA/XPR1/GLUL/CCND1/SIK2/MDM2/MAP1LC3B2/ALDH1A2/CHSY1/MAP1LC3B/PDK2/WIPI1/SEH1L/ZFP36/FOXA2/AHCY/PICK1/ATF4/ADSL/NPRL2/FNIP1/STC2/CPEB4/FOXO3/MAP3K5/NUDT1/NAMPT/TRIM24/LCN2/SLC27A4	33
BP	GO:0044262	cellular carbohydrate metabolic process	20/891	198/10468	0.242253	0.991216	0.991216	SESN2/LEPR/CSGALNACT2/HKDC1/EXT2/GNPTAB/CALM1/LCMT1/PHKB/PDK2/MIDN/B3GNT2/FOXA2/SLC5A3/XYLB/IDUA/COQ2/PPP1R3B/NCOA2/IDNK	20
BP	GO:0043523	regulation of neuron apoptotic process	15/891	144/10468	0.242961	0.991216	0.991216	ATM/ZPR1/TGFB3/TYRO3/ARRB2/CDK5R1/AKT1S1/CEBPB/ATF4/CPEB4/FOXO3/SOD2/HIPK2/JAK2/SET	15
BP	GO:0048592	eye morphogenesis	8/891	70/10468	0.243182	0.991216	0.991216	FJX1/GDF11/FOXL2/FAT1/BAK1/PRDM1/HIPK2/TDRD7	8
BP	GO:0007030	Golgi organization	12/891	112/10468	0.243417	0.991216	0.991216	PDE4DIP/ARHGAP21/ARL1/TMED2/GOLGA8B/COG1/CLASP2/PDCD10/TMED7/CSNK1A1/YWHAZ/GOLGA2	12
BP	GO:0001890	placenta development	10/891	91/10468	0.24474	0.991216	0.991216	CDKN1C/TMED2/EPAS1/CASP8/CEBPB/HES1/STC2/MAPK14/PRDM1/MAP3K4	10
BP	GO:0002822	regulation of adaptive immune response based on somatic recombination of immune receptors built from immunoglobulin superfamily domains	10/891	91/10468	0.24474	0.991216	0.991216	XCL1/FADD/B2M/ATAD5/IL18R1/BCL6/AGER/STX7/IL6/PAXIP1	10
BP	GO:0098742	cell-cell adhesion via plasma-membrane adhesion molecules	10/891	91/10468	0.24474	0.991216	0.991216	PTPRF/ITGB1/ROBO3/AJUBA/CDH15/FAT1/PCDHGA1/PCDHGA2/MAPK14/CD164	10
BP	GO:1903008	organelle disassembly	10/891	91/10468	0.24474	0.991216	0.991216	HAX1/GBA/EIF2D/ATG2A/MAP1LC3B2/MAP1LC3B/WIPI1/ATG12/TOMM7/GOLGA2	10
BP	GO:0072655	establishment of protein localization to mitochondrion	13/891	123/10468	0.246661	0.991216	0.991216	LEPROT/HAX1/TIMM8B/TIMM21/TIMM44/PDCD5/SAE1/CASP8/CHCHD4/PARL/TOMM7/IMMP2L/YWHAZ	13
BP	GO:0002479	antigen processing and presentation of exogenous peptide antigen via MHC class I, TAP-dependent	7/891	60/10468	0.247029	0.991216	0.991216	PSMB4/PSMA1/B2M/PSMB3/PSMD3/PSMF1/PSMD5	7
BP	GO:0072332	intrinsic apoptotic signaling pathway by p53 class mediator	7/891	60/10468	0.247029	0.991216	0.991216	MDM2/BRCA2/RPL26/ATAD5/PDK2/HINT1/HIPK2	7
BP	GO:1903312	negative regulation of mRNA metabolic process	7/891	60/10468	0.247029	0.991216	0.991216	AXIN2/ZFP36/SUPT5H/RBM38/MAPK14/HNRNPA2B1/SECISBP2	7
BP	GO:0019080	viral gene expression	18/891	177/10468	0.247661	0.991216	0.991216	RPS27/EIF2D/RPL27A/NUP160/AAAS/RPL41/RPL4/RPL26/SEH1L/ZFP36/SUPT5H/RPL13A/RPS11/RPL3/ZNF639/NUP205/RPL30/RPL35	18
BP	GO:0006195	purine nucleotide catabolic process	4/891	30/10468	0.249197	0.991216	0.991216	NUDT4/HDDC3/HINT1/NUDT1	4
BP	GO:0016266	O-glycan processing	4/891	30/10468	0.249197	0.991216	0.991216	B3GNT2/GALNT5/ST6GAL1/GALNT10	4
BP	GO:0018279	protein N-linked glycosylation via asparagine	4/891	30/10468	0.249197	0.991216	0.991216	FUT8/MCFD2/ST6GAL1/MGAT1	4
BP	GO:0036258	multivesicular body assembly	4/891	30/10468	0.249197	0.991216	0.991216	TSG101/VPS36/CHMP6/VPS37A	4
BP	GO:0070228	regulation of lymphocyte apoptotic process	4/891	30/10468	0.249197	0.991216	0.991216	BCL10/FADD/BCL6/FNIP1	4
BP	GO:0042177	negative regulation of protein catabolic process	11/891	102/10468	0.249339	0.991216	0.991216	AZIN2/LRIG2/OS9/N4BP1/PHB/TLK2/PSMF1/USP25/RYBP/CYP51A1/HIPK2	11
BP	GO:0021766	hippocampus development	6/891	50/10468	0.24998	0.991216	0.991216	LHX5/CDK5R1/NME1/TMEM108/UQCRQ/CDK6	6
BP	GO:0030071	regulation of mitotic metaphase/anaphase transition	6/891	50/10468	0.24998	0.991216	0.991216	ATM/LCMT1/CDT1/CDC6/ANAPC4/CDC26	6
BP	GO:1900407	regulation of cellular response to oxidative stress	6/891	50/10468	0.24998	0.991216	0.991216	SFPQ/FUT8/ATF4/SLC7A11/FOXO3/SOD2	6
BP	GO:1901880	negative regulation of protein depolymerization	6/891	50/10468	0.24998	0.991216	0.991216	CAPZA1/CKAP2/SPTBN4/SPEF1/CLASP2/VILL	6
BP	GO:0030111	regulation of Wnt signaling pathway	23/891	232/10468	0.250474	0.991216	0.991216	PTPRU/PSMB4/BAMBI/FAM53B/PSMA1/PFDN5/GLI1/GPRC5B/IFT20/PSMB3/PSMD3/AXIN2/PSMF1/RUNX1/NPHP3/IFT80/JADE1/CSNK1A1/MAPK14/FOXO3/TMEM64/UBR5/PSMD5	23
BP	GO:0006790	sulfur compound metabolic process	25/891	254/10468	0.250543	0.991216	0.991216	MPC2/CSGALNACT2/FAR1/ISCU/CHSY1/NUBP1/SULT1A1/PDPR/PDK2/CNDP2/B3GNT2/AHCY/GGT7/ACSS2/SLC25A1/IDUA/SLC26A1/LOC344967/SLC7A11/MGST2/EGFLAM/ACSL6/HSPA9/SLC35B3/OGDH	25
BP	GO:0048708	astrocyte differentiation	5/891	40/10468	0.251259	0.991216	0.991216	ID2/HES1/AGER/IL6/CDK6	5
BP	GO:0050732	negative regulation of peptidyl-tyrosine phosphorylation	5/891	40/10468	0.251259	0.991216	0.991216	TSG101/MVP/CHMP6/ZGPAT/PARP14	5
BP	GO:1904589	regulation of protein import	5/891	40/10468	0.251259	0.991216	0.991216	EFCAB7/ZPR1/PDCD5/MAPK14/UBR5	5
BP	GO:0050730	regulation of peptidyl-tyrosine phosphorylation	15/891	145/10468	0.25133	0.991216	0.991216	HAX1/TSG101/GPRC5B/MVP/ARRB2/CHMP6/ZGPAT/PARP14/HES1/IL6/NCAPG2/CNOT7/JAK2/DLG3/RAP2C	15
BP	GO:1905330	regulation of morphogenesis of an epithelium	12/891	113/10468	0.252955	0.991216	0.991216	PSMB4/PSMA1/GPC6/ARRB2/PSMB3/PSMD3/AP2S1/PSMF1/CLASP2/NPHP3/SEC24B/PSMD5	12
BP	GO:0050890	cognition	16/891	156/10468	0.252976	0.991216	0.991216	ITGB1/TACR2/EIF4EBP2/CPEB3/AAAS/MEIS2/B2M/IFT20/KMT2B/CEBPB/SLC7A11/GM2A/AGER/ATXN1/RP9/VDAC3	16
BP	GO:0035966	response to topologically incorrect protein	17/891	167/10468	0.254267	0.991216	0.991216	EDEM3/CCND1/FICD/JKAMP/WIPI1/HSPA13/SDF2L1/ATF4/EDEM1/MANF/SEC31A/HSPA9/STC2/BAK1/HERPUD2/COPS5/TOR1A	17
BP	GO:0019935	cyclic-nucleotide-mediated signaling	8/891	71/10468	0.255366	0.991216	0.991216	GPR3/PTGER3/EIF4EBP2/PDE3B/PTHLH/NUDT4/CALM1/PRKAR2A	8
BP	GO:0030203	glycosaminoglycan metabolic process	10/891	92/10468	0.255393	0.991216	0.991216	CSGALNACT2/EXT2/GPC6/CHSY1/HS3ST3A1/B3GNT2/GALNT5/PXYLP1/IDUA/EGFLAM	10
BP	GO:0050900	leukocyte migration	20/891	200/10468	0.256537	0.991216	0.991216	NBL1/ARTN/CD58/XCL1/ITGB1/FADD/SELPLG/ADAM10/HSD3B7/PIP5K1C/THBD/SLC7A11/GYPB/GYPA/STK10/AGER/ADTRP/MAPK14/IL6/DOK2	20
BP	GO:0045089	positive regulation of innate immune response	23/891	233/10468	0.257135	0.991216	0.991216	SFPQ/BCL10/PSMB4/TLR5/PSMA1/UNC93B1/FADD/TYRO3/ARRB2/PSMB3/PSMD3/EPG5/CASP8/XRCC5/PSMF1/MAPKAPK3/TLR9/UBE2K/TXK/ULBP2/CUL1/LRRC14/PSMD5	23
BP	GO:0035967	cellular response to topologically incorrect protein	14/891	135/10468	0.258051	0.991216	0.991216	CCND1/FICD/WIPI1/HSPA13/SDF2L1/ATF4/EDEM1/SEC31A/HSPA9/STC2/BAK1/HERPUD2/COPS5/TOR1A	14
BP	GO:0034766	negative regulation of ion transmembrane transport	7/891	61/10468	0.260338	0.991216	0.991216	ISCU/CALM1/NEDD4/TLR9/GOPC/SRI/ATP7A	7
BP	GO:0046902	regulation of mitochondrial membrane permeability	7/891	61/10468	0.260338	0.991216	0.991216	STPG1/RHOT2/SPG7/CASP8/BAK1/TMEM14A/YWHAZ	7
BP	GO:0045088	regulation of innate immune response	27/891	278/10468	0.262474	0.991216	0.991216	SFPQ/BCL10/PSMB4/TLR5/PSMA1/UNC93B1/FADD/TYRO3/ARRB2/PSMB3/PSMD3/EPG5/NR1H2/CASP8/XRCC5/PSMF1/MAPKAPK3/TLR9/PARP14/UBE2K/TXK/ULBP2/CUL1/CNOT7/LRRC14/JAK2/PSMD5	27
BP	GO:0017148	negative regulation of translation	12/891	114/10468	0.262624	0.991216	0.991216	SESN2/SRP9/EIF4EBP2/CPEB3/TNRC6C/ZFP36/RPL13A/ZFP36L2/ATF4/CPEB2/CPEB4/CNOT7	12
BP	GO:0034614	cellular response to reactive oxygen species	12/891	114/10468	0.262624	0.991216	0.991216	ADPRHL2/MDM2/TPM1/PCGF2/PDK2/PDCD10/FOXO3/MAP3K5/SOD2/IL6/LCN2/ATP7A	12
BP	GO:0000305	response to oxygen radical	3/891	21/10468	0.263153	0.991216	0.991216	ADPRHL2/SOD2/ATP7A	3
BP	GO:0001539	cilium or flagellum-dependent cell motility	3/891	21/10468	0.263153	0.991216	0.991216	CFAP20/SPEF1/EFHC1	3
BP	GO:0001893	maternal placenta development	3/891	21/10468	0.263153	0.991216	0.991216	TMED2/STC2/PRDM1	3
BP	GO:0001941	postsynaptic membrane organization	3/891	21/10468	0.263153	0.991216	0.991216	GPHN/SLC7A11/FNTA	3
BP	GO:0006783	heme biosynthetic process	3/891	21/10468	0.263153	0.991216	0.991216	UROD/SLC25A38/CPOX	3
BP	GO:0009261	ribonucleotide catabolic process	3/891	21/10468	0.263153	0.991216	0.991216	NUDT4/HDDC3/HINT1	3
BP	GO:0015012	heparan sulfate proteoglycan biosynthetic process	3/891	21/10468	0.263153	0.991216	0.991216	EXT2/HS3ST3A1/PXYLP1	3
BP	GO:0021587	cerebellum morphogenesis	3/891	21/10468	0.263153	0.991216	0.991216	GLI1/LHX5/ATP7A	3
BP	GO:0032715	negative regulation of interleukin-6 production	3/891	21/10468	0.263153	0.991216	0.991216	GBA/ARRB2/TLR9	3
BP	GO:0032965	regulation of collagen biosynthetic process	3/891	21/10468	0.263153	0.991216	0.991216	TGFB3/ARRB2/IL6	3
BP	GO:0035066	positive regulation of histone acetylation	3/891	21/10468	0.263153	0.991216	0.991216	BRD7/KAT7/PAXIP1	3
BP	GO:0039702	viral budding via host ESCRT complex	3/891	21/10468	0.263153	0.991216	0.991216	TSG101/CHMP6/VPS37A	3
BP	GO:0046835	carbohydrate phosphorylation	3/891	21/10468	0.263153	0.991216	0.991216	HKDC1/GNPTAB/XYLB	3
BP	GO:0050873	brown fat cell differentiation	3/891	21/10468	0.263153	0.991216	0.991216	CEBPB/MAPK14/ARL4A	3
BP	GO:0055023	positive regulation of cardiac muscle tissue growth	3/891	21/10468	0.263153	0.991216	0.991216	GLI1/MAPK14/ZFPM2	3
BP	GO:0060285	cilium-dependent cell motility	3/891	21/10468	0.263153	0.991216	0.991216	CFAP20/SPEF1/EFHC1	3
BP	GO:0071675	regulation of mononuclear cell migration	3/891	21/10468	0.263153	0.991216	0.991216	NBL1/AGER/MAPK14	3
BP	GO:1900101	regulation of endoplasmic reticulum unfolded protein response	3/891	21/10468	0.263153	0.991216	0.991216	FICD/BAK1/COPS5	3
BP	GO:0002218	activation of innate immune response	20/891	201/10468	0.263802	0.991216	0.991216	SFPQ/BCL10/PSMB4/TLR5/PSMA1/UNC93B1/FADD/TYRO3/ARRB2/PSMB3/PSMD3/EPG5/CASP8/XRCC5/PSMF1/MAPKAPK3/TLR9/CUL1/LRRC14/PSMD5	20
BP	GO:0043405	regulation of MAP kinase activity	21/891	212/10468	0.263961	0.991216	0.991216	GBA/AIDA/SMPD1/TSG101/AJUBA/MAP4K5/TGFB3/SPRED1/MAP2K3/TRIB2/MAPKAPK3/TLR9/PDCD10/FGF18/AGER/MAPK14/MAP3K5/MAP3K4/TRIB1/JAK2/RGS3	21
BP	GO:0019221	cytokine-mediated signaling pathway	43/891	457/10468	0.264106	0.991216	0.991216	IFI6/LEPR/CAPZA1/PSMB4/POU2F1/XCL1/ITGB1/CAMK2G/PSMA1/STX3/CCND1/FADD/RAP1B/SOCS2/B2M/PSMB3/PSMD3/ACTN4/NR1H2/IL18R1/CASP8/PSMF1/RUNX1/CCR4/PARP14/BCL6/UBE2K/TXK/OSMR/HSPA9/LTB/FOXO3/SOD2/IL6/HNRNPA2B1/CUL1/CNOT7/CEBPD/YWHAZ/MYC/JAK2/PSMD5/LCN2	43
BP	GO:1903827	regulation of cellular protein localization	38/891	401/10468	0.26464	0.991216	0.991216	SESN2/EFCAB7/LEPROT/LRIG2/HAX1/GLUL/NVL/ITGB1/TSG101/STX3/ZPR1/OS9/MDM2/GPC6/ADAM10/CDT1/CDK5R1/KAT7/PDCD5/SAE1/CASP8/TP53INP2/CCT8/EDEM1/PDCD10/PARL/SLC7A11/ICE1/MAPK14/GOPC/STX7/SLC35D3/TOMM7/PINX1/PCM1/YWHAZ/UBR5/TOR1A	38
BP	GO:0006977	DNA damage response, signal transduction by p53 class mediator resulting in cell cycle arrest	6/891	51/10468	0.264714	0.991216	0.991216	ATM/MDM2/RBL2/RPL26/CNOT4/CNOT7	6
BP	GO:0007156	homophilic cell adhesion via plasma membrane adhesion molecules	6/891	51/10468	0.264714	0.991216	0.991216	ITGB1/ROBO3/CDH15/FAT1/PCDHGA1/PCDHGA2	6
BP	GO:0046173	polyol biosynthetic process	6/891	51/10468	0.264714	0.991216	0.991216	GBA/PCBD1/CYP2R1/PTS/PLCL1/PCBD2	6
BP	GO:0048593	camera-type eye morphogenesis	6/891	51/10468	0.264714	0.991216	0.991216	FJX1/GDF11/FAT1/BAK1/HIPK2/TDRD7	6
BP	GO:0071260	cellular response to mechanical stimulus	6/891	51/10468	0.264714	0.991216	0.991216	BCL10/TLR5/FADD/PIEZO1/CASP8/BAK1	6
BP	GO:1902099	regulation of metaphase/anaphase transition of cell cycle	6/891	51/10468	0.264714	0.991216	0.991216	ATM/LCMT1/CDT1/CDC6/ANAPC4/CDC26	6
BP	GO:1902108	regulation of mitochondrial membrane permeability involved in apoptotic process	6/891	51/10468	0.264714	0.991216	0.991216	STPG1/RHOT2/CASP8/BAK1/TMEM14A/YWHAZ	6
BP	GO:1904063	negative regulation of cation transmembrane transport	6/891	51/10468	0.264714	0.991216	0.991216	ISCU/CALM1/NEDD4/TLR9/SRI/ATP7A	6
BP	GO:0070585	protein localization to mitochondrion	13/891	125/10468	0.265071	0.991216	0.991216	LEPROT/HAX1/TIMM8B/TIMM21/TIMM44/PDCD5/SAE1/CASP8/CHCHD4/PARL/TOMM7/IMMP2L/YWHAZ	13
BP	GO:0008637	apoptotic mitochondrial changes	10/891	93/10468	0.266198	0.991216	0.991216	STPG1/IFI6/RHOT2/ARRB2/PDCD5/CASP8/BAK1/TMEM14A/SOD2/YWHAZ	10
BP	GO:0010508	positive regulation of autophagy	10/891	93/10468	0.266198	0.991216	0.991216	SESN2/GBA/PIP4K2A/KAT5/SUPT5H/TP53INP2/NPRL2/FOXO3/EPM2A/TOMM7	10
BP	GO:0002478	antigen processing and presentation of exogenous peptide antigen	14/891	136/10468	0.266956	0.991216	0.991216	CAPZA1/PSMB4/PSMA1/SEC23A/B2M/PSMB3/PSMD3/AP2S1/PSMF1/SEC31A/SEC24B/SEC24D/DCTN6/PSMD5	14
BP	GO:0030279	negative regulation of ossification	5/891	41/10468	0.267882	0.991216	0.991216	CHSY1/AXIN2/ID2/CDK6/TMEM64	5
BP	GO:0034121	regulation of toll-like receptor signaling pathway	5/891	41/10468	0.267882	0.991216	0.991216	TLR5/TYRO3/ARRB2/TLR9/LRRC14	5
BP	GO:0051785	positive regulation of nuclear division	5/891	41/10468	0.267882	0.991216	0.991216	NUSAP1/CDT1/RANBP1/ANAPC4/PHIP	5
BP	GO:0070192	chromosome organization involved in meiotic cell cycle	5/891	41/10468	0.267882	0.991216	0.991216	ATM/RAD51/DMC1/MEI1/SMC4	5
BP	GO:1902369	negative regulation of RNA catabolic process	5/891	41/10468	0.267882	0.991216	0.991216	AXIN2/ZFP36/RBM38/MAPK14/SECISBP2	5
BP	GO:0006986	response to unfolded protein	15/891	147/10468	0.268389	0.991216	0.991216	EDEM3/CCND1/FICD/JKAMP/WIPI1/HSPA13/ATF4/EDEM1/MANF/SEC31A/HSPA9/STC2/BAK1/HERPUD2/COPS5	15
BP	GO:0006099	tricarboxylic acid cycle	4/891	31/10468	0.268512	0.991216	0.991216	SDHB/SDHD/OGDH/ACO1	4
BP	GO:0006778	porphyrin-containing compound metabolic process	4/891	31/10468	0.268512	0.991216	0.991216	UROD/RSAD1/SLC25A38/CPOX	4
BP	GO:0009311	oligosaccharide metabolic process	4/891	31/10468	0.268512	0.991216	0.991216	FUT8/MAN2C1/IDUA/GM2A	4
BP	GO:0018196	peptidyl-asparagine modification	4/891	31/10468	0.268512	0.991216	0.991216	FUT8/MCFD2/ST6GAL1/MGAT1	4
BP	GO:0032663	regulation of interleukin-2 production	4/891	31/10468	0.268512	0.991216	0.991216	XCL1/KAT5/ZFP36/RUNX1	4
BP	GO:0036257	multivesicular body organization	4/891	31/10468	0.268512	0.991216	0.991216	TSG101/VPS36/CHMP6/VPS37A	4
BP	GO:1902883	negative regulation of response to oxidative stress	4/891	31/10468	0.268512	0.991216	0.991216	GGT7/ATF4/SLC7A11/SOD2	4
BP	GO:0016052	carbohydrate catabolic process	16/891	158/10468	0.269455	0.991216	0.991216	HKDC1/NUP160/AAAS/FUT8/CALM1/ADPGK/MAN2C1/PHKB/SEH1L/XYLB/GM2A/OGDH/NUP205/PPP1R3B/IDNK/SLC2A6	16
BP	GO:0090263	positive regulation of canonical Wnt signaling pathway	11/891	104/10468	0.269731	0.991216	0.991216	PSMB4/BAMBI/FAM53B/PSMA1/GPRC5B/PSMB3/PSMD3/AXIN2/PSMF1/UBR5/PSMD5	11
BP	GO:0048511	rhythmic process	19/891	191/10468	0.271026	0.991216	0.991216	SFPQ/DTL/TGFB3/TYRO3/ARRB2/RAI1/CDK5R1/PHLPP1/ID2/AHCY/NRIP1/ATF4/BHLHE40/GDF9/FOXO3/CBX3/NAMPT/NCOA2/NFIL3	19
BP	GO:0006596	polyamine biosynthetic process	2/891	12/10468	0.272219	0.991216	0.991216	AZIN2/ODC1	2
BP	GO:0006706	steroid catabolic process	2/891	12/10468	0.272219	0.991216	0.991216	HSD17B6/HSD3B7	2
BP	GO:0007100	mitotic centrosome separation	2/891	12/10468	0.272219	0.991216	0.991216	NEK2/RANBP1	2
BP	GO:0008298	intracellular mRNA localization	2/891	12/10468	0.272219	0.991216	0.991216	PRPF18/ZFP36	2
BP	GO:0009209	pyrimidine ribonucleoside triphosphate biosynthetic process	2/891	12/10468	0.272219	0.991216	0.991216	NME1/UCKL1	2
BP	GO:0010523	negative regulation of calcium ion transport into cytosol	2/891	12/10468	0.272219	0.991216	0.991216	CALM1/SRI	2
BP	GO:0010560	positive regulation of glycoprotein biosynthetic process	2/891	12/10468	0.272219	0.991216	0.991216	PXYLP1/GOLGA2	2
BP	GO:0010888	negative regulation of lipid storage	2/891	12/10468	0.272219	0.991216	0.991216	NR1H2/IL6	2
BP	GO:0014912	negative regulation of smooth muscle cell migration	2/891	12/10468	0.272219	0.991216	0.991216	TPM1/TRIB1	2
BP	GO:0018206	peptidyl-methionine modification	2/891	12/10468	0.272219	0.991216	0.991216	NAA25/NAA16	2
BP	GO:0021544	subpallium development	2/891	12/10468	0.272219	0.991216	0.991216	SLC7A11/SECISBP2	2
BP	GO:0021697	cerebellar cortex formation	2/891	12/10468	0.272219	0.991216	0.991216	LHX5/ATP7A	2
BP	GO:0022400	regulation of rhodopsin mediated signaling pathway	2/891	12/10468	0.272219	0.991216	0.991216	CALM1/FNTA	2
BP	GO:0030206	chondroitin sulfate biosynthetic process	2/891	12/10468	0.272219	0.991216	0.991216	CSGALNACT2/CHSY1	2
BP	GO:0032486	Rap protein signal transduction	2/891	12/10468	0.272219	0.991216	0.991216	RAP1B/RAP2C	2
BP	GO:0032802	low-density lipoprotein particle receptor catabolic process	2/891	12/10468	0.272219	0.991216	0.991216	AP2S1/MYLIP	2
BP	GO:0035883	enteroendocrine cell differentiation	2/891	12/10468	0.272219	0.991216	0.991216	HES1/CDK6	2
BP	GO:0042535	positive regulation of tumor necrosis factor biosynthetic process	2/891	12/10468	0.272219	0.991216	0.991216	AGER/JAK2	2
BP	GO:0043174	nucleoside salvage	2/891	12/10468	0.272219	0.991216	0.991216	APRT/UCKL1	2
BP	GO:0045408	regulation of interleukin-6 biosynthetic process	2/891	12/10468	0.272219	0.991216	0.991216	CEBPB/AGER	2
BP	GO:0046479	glycosphingolipid catabolic process	2/891	12/10468	0.272219	0.991216	0.991216	GBA/GM2A	2
BP	GO:0048143	astrocyte activation	2/891	12/10468	0.272219	0.991216	0.991216	AGER/IL6	2
BP	GO:0048311	mitochondrion distribution	2/891	12/10468	0.272219	0.991216	0.991216	MEF2A/TRAK1	2
BP	GO:0051988	regulation of attachment of spindle microtubules to kinetochore	2/891	12/10468	0.272219	0.991216	0.991216	NEK2/SPAG5	2
BP	GO:0060314	regulation of ryanodine-sensitive calcium-release channel activity	2/891	12/10468	0.272219	0.991216	0.991216	CALM1/SRI	2
BP	GO:0061081	positive regulation of myeloid leukocyte cytokine production involved in immune response	2/891	12/10468	0.272219	0.991216	0.991216	BCL10/GPRC5B	2
BP	GO:1904923	regulation of autophagy of mitochondrion in response to mitochondrial depolarization	2/891	12/10468	0.272219	0.991216	0.991216	GBA/TOMM7	2
BP	GO:2000479	regulation of cAMP-dependent protein kinase activity	2/891	12/10468	0.272219	0.991216	0.991216	SESN2/PRKAR2A	2
BP	GO:2001025	positive regulation of response to drug	2/891	12/10468	0.272219	0.991216	0.991216	TACR2/FOXO3	2
BP	GO:0038061	NIK/NF-kappaB signaling	12/891	115/10468	0.272418	0.991216	0.991216	PSMB4/PSMA1/ZFP91/PSMB3/PSMD3/ACTN4/IL18R1/PSMF1/TLR9/AGER/CUL1/PSMD5	12
BP	GO:1905269	positive regulation of chromatin organization	9/891	83/10468	0.273141	0.991216	0.991216	ATM/SART3/BRD7/KAT7/BCL6/JARID2/C6orf89/PAXIP1/PHF19	9
BP	GO:0000380	alternative mRNA splicing, via spliceosome	7/891	62/10468	0.273846	0.991216	0.991216	SFPQ/ZC3H10/SART3/NSRP1/RBM15B/TRA2B/SREK1	7
BP	GO:0006493	protein O-linked glycosylation	7/891	62/10468	0.273846	0.991216	0.991216	MGAT5B/B3GNT2/GALNT5/SDF2L1/TRAK1/ST6GAL1/GALNT10	7
BP	GO:0006901	vesicle coating	7/891	62/10468	0.273846	0.991216	0.991216	TMED2/SEC23A/MCFD2/SEC31A/SEC24B/SEC24D/GOLGA2	7
BP	GO:0033047	regulation of mitotic sister chromatid segregation	7/891	62/10468	0.273846	0.991216	0.991216	ATM/LCMT1/CDT1/CDC6/ANAPC1/ANAPC4/CDC26	7
BP	GO:0048565	digestive tract development	7/891	62/10468	0.273846	0.991216	0.991216	GLI1/TGFB3/ALDH1A2/ID2/NPHP3/HES1/PRDM1	7
BP	GO:1903051	negative regulation of proteolysis involved in cellular protein catabolic process	7/891	62/10468	0.273846	0.991216	0.991216	OS9/N4BP1/TLK2/PSMF1/USP25/RYBP/HIPK2	7
BP	GO:1903533	regulation of protein targeting	7/891	62/10468	0.273846	0.991216	0.991216	LEPROT/HAX1/CDK5R1/PDCD5/SAE1/PARL/TOMM7	7
BP	GO:0090150	establishment of protein localization to membrane	26/891	269/10468	0.275707	0.991216	0.991216	RPS27/SRP9/RPL27A/STX3/RPL41/AMN/SRP14/RPL4/RPL26/CDK5R1/GGA3/PDCD5/RPL13A/RPS11/CASP8/ARFRP1/RPL3/BHLHE40-AS1/ZDHHC19/GOPC/ZDHHC14/VPS37A/RPL30/YWHAZ/RPL35/ZDHHC12	26
BP	GO:0051098	regulation of binding	25/891	258/10468	0.276384	0.991216	0.991216	STPG1/PTPRF/NEK2/AIDA/NVL/BAMBI/PCBD1/B2M/ERCC4/AKTIP/CDT1/ARRB2/NME1/ID2/PLCL1/HJURP/HES1/CSNK1A1/AGER/BAK1/SRI/HIPK2/PINX1/JAK2/GOLGA2	25
BP	GO:0051147	regulation of muscle cell differentiation	10/891	94/10468	0.277145	0.991216	0.991216	BNIP2/MEF2A/CDH15/ARRB2/OLFM2/EHD2/RBM38/MED28/MAPK14/SOD2	10
BP	GO:0070848	response to growth factor	40/891	426/10468	0.277789	0.991216	0.991216	NBL1/SORT1/XCL1/BAMBI/CDKN1C/ZPR1/BCL9L/MDM2/ARPC3/FUT8/TGFB3/MEIS2/SPRED1/NEDD4/RNF111/ARRB2/MAP2K3/MTMR4/TGIF1/DAND5/PDCD5/ZFP36/EID2/AKT1S1/LTBP1/ZFP36L2/TMEM108/HES1/GDF9/NR3C1/FGF18/HIVEP1/MAPK14/FRS3/FOXO3/CITED2/HIPK2/FNTA/MYC/ATP7A	40
BP	GO:0061013	regulation of mRNA catabolic process	17/891	170/10468	0.278325	0.991216	0.991216	PSMB4/CPEB3/PSMA1/PSMB3/PSMD3/AXIN2/TNRC6C/ZFP36/ZFP36L2/PSMF1/RBM38/MAPK14/CNOT7/YWHAZ/SECISBP2/PSMD5/SET	17
BP	GO:0051648	vesicle localization	21/891	214/10468	0.278331	0.991216	0.991216	STX3/RAP1B/TMED2/SEC23A/VPS18/GOSR1/WIPI1/AP3D1/PIP5K1C/ACTN4/MCFD2/CLASP2/TRAK1/SEC31A/SEC24B/SEC24D/AP3S1/AP3M2/DNM1/GOLGA2/TOR1A	21
BP	GO:0000381	regulation of alternative mRNA splicing, via spliceosome	6/891	52/10468	0.279662	0.991216	0.991216	ZC3H10/SART3/NSRP1/RBM15B/TRA2B/SREK1	6
BP	GO:0072431	signal transduction involved in mitotic G1 DNA damage checkpoint	6/891	52/10468	0.279662	0.991216	0.991216	ATM/MDM2/RBL2/RPL26/CNOT4/CNOT7	6
BP	GO:0075733	intracellular transport of virus	6/891	52/10468	0.279662	0.991216	0.991216	TSG101/NUP160/AAAS/SEH1L/NUP205/VPS37A	6
BP	GO:1902400	intracellular signal transduction involved in G1 DNA damage checkpoint	6/891	52/10468	0.279662	0.991216	0.991216	ATM/MDM2/RBL2/RPL26/CNOT4/CNOT7	6
BP	GO:1903749	positive regulation of establishment of protein localization to mitochondrion	6/891	52/10468	0.279662	0.991216	0.991216	LEPROT/PDCD5/SAE1/CASP8/TOMM7/YWHAZ	6
BP	GO:0030968	endoplasmic reticulum unfolded protein response	11/891	105/10468	0.280123	0.991216	0.991216	CCND1/FICD/WIPI1/HSPA13/ATF4/EDEM1/SEC31A/STC2/BAK1/HERPUD2/COPS5	11
BP	GO:0007498	mesoderm development	8/891	73/10468	0.280271	0.991216	0.991216	ITGB1/EXT2/GDF11/DAND5/ETS2/CITED2/ZFPM2/JAK2	8
BP	GO:0042737	drug catabolic process	8/891	73/10468	0.280271	0.991216	0.991216	NPL/PCBD1/CYP2R1/MTHFS/FAH/SULT1A1/IDUA/ACHE	8
BP	GO:0034470	ncRNA processing	32/891	337/10468	0.282211	0.991216	0.991216	MRTO4/TRMT13/RPS27/ISG20L2/RRNAD1/TRMT1L/INTS7/NVL/HEATR1/ALKBH8/DDX10/FAM98B/MTFMT/IMP3/USB1/PELP1/RPL26/WDR18/FBL/FAM207A/RPP14/NSUN3/TRMT10A/INTS12/GAR1/RPP21/RPL7L1/HNRNPA2B1/TYW1B/NSUN5/METTL2B/RPL35	32
BP	GO:0034620	cellular response to unfolded protein	12/891	116/10468	0.282328	0.991216	0.991216	CCND1/FICD/WIPI1/HSPA13/ATF4/EDEM1/SEC31A/HSPA9/STC2/BAK1/HERPUD2/COPS5	12
BP	GO:0032649	regulation of interferon-gamma production	5/891	42/10468	0.284738	0.991216	0.991216	XCL1/FADD/IL18R1/TLR9/TXK	5
BP	GO:0035065	regulation of histone acetylation	5/891	42/10468	0.284738	0.991216	0.991216	BRD7/KAT7/TAF7/PAXIP1/SET	5
BP	GO:0042446	hormone biosynthetic process	5/891	42/10468	0.284738	0.991216	0.991216	HSD17B7/CYP17A1/CYP2R1/HSD17B6/STC2	5
BP	GO:0061014	positive regulation of mRNA catabolic process	5/891	42/10468	0.284738	0.991216	0.991216	CPEB3/TNRC6C/ZFP36/ZFP36L2/CNOT7	5
BP	GO:0070227	lymphocyte apoptotic process	5/891	42/10468	0.284738	0.991216	0.991216	BCL10/FADD/BCL6/FNIP1/BAK1	5
BP	GO:0099518	vesicle cytoskeletal trafficking	5/891	42/10468	0.284738	0.991216	0.991216	AP3D1/ACTN4/TRAK1/AP3S1/AP3M2	5
BP	GO:0046631	alpha-beta T cell activation	9/891	84/10468	0.284884	0.991216	0.991216	XCL1/AP3D1/IL18R1/RUNX1/BCL6/AGER/PRDM1/IL6/ATP7A	9
BP	GO:0009451	RNA modification	14/891	138/10468	0.285076	0.991216	0.991216	TRMT13/RRNAD1/TRMT1L/ALKBH8/MTFMT/FBL/TRMT2A/RBM15B/NSUN3/TRMT10A/GAR1/NSUN5/METTL2B/TRUB2	14
BP	GO:0032872	regulation of stress-activated MAPK cascade	14/891	138/10468	0.285076	0.991216	0.991216	MAGI3/AIDA/MAP4K5/PHLPP1/TLR9/PDCD10/MECOM/AGER/MAP3K5/MAP3K4/KLHDC10/HIPK2/COPS5/MYC	14
BP	GO:0031347	regulation of defense response	42/891	450/10468	0.285274	0.991216	0.991216	SFPQ/PTGER3/BCL10/PSMB4/GBA/XCL1/CFH/TLR5/PSMA1/UNC93B1/FADD/ATM/TYRO3/GPRC5B/SETD6/ARRB2/PSMB3/PSMD3/PHB/EPG5/NR1H2/CASP8/XRCC5/PSMF1/CEBPB/MAPKAPK3/TLR9/PARP14/BCL6/UBE2K/TXK/MGST2/OSMR/AGER/MAPK14/ULBP2/IL6/CUL1/CNOT7/LRRC14/JAK2/PSMD5	42
BP	GO:0007050	cell cycle arrest	18/891	182/10468	0.286523	0.991216	0.991216	RRAGC/CDC14A/CDKN1C/TSG101/CCND1/DDIAS/ATM/MDM2/RBL2/RPL26/CRLF3/CDK5R1/ID2/CDK6/CNOT4/CNOT7/NBN/MYC	18
BP	GO:0030574	collagen catabolic process	3/891	22/10468	0.287063	0.991216	0.991216	ITGB1/MMP17/MMP15	3
BP	GO:0031114	regulation of microtubule depolymerization	3/891	22/10468	0.287063	0.991216	0.991216	CKAP2/SPEF1/CLASP2	3
BP	GO:0032722	positive regulation of chemokine production	3/891	22/10468	0.287063	0.991216	0.991216	TLR9/AGER/IL6	3
BP	GO:0034067	protein localization to Golgi apparatus	3/891	22/10468	0.287063	0.991216	0.991216	ARL1/IFT20/ARFRP1	3
BP	GO:0046456	icosanoid biosynthetic process	3/891	22/10468	0.287063	0.991216	0.991216	GGT7/MGST2/TBXAS1	3
BP	GO:0046850	regulation of bone remodeling	3/891	22/10468	0.287063	0.991216	0.991216	LEPR/IL6/TMEM64	3
BP	GO:0048536	spleen development	3/891	22/10468	0.287063	0.991216	0.991216	FADD/JARID2/CITED2	3
BP	GO:0060119	inner ear receptor cell development	3/891	22/10468	0.287063	0.991216	0.991216	IFT20/HES1/SEC24B	3
BP	GO:0060325	face morphogenesis	3/891	22/10468	0.287063	0.991216	0.991216	ARID5B/TGFB3/TIPARP	3
BP	GO:0070169	positive regulation of biomineral tissue development	3/891	22/10468	0.287063	0.991216	0.991216	TGFB3/CEBPB/ATF4	3
BP	GO:0070861	regulation of protein exit from endoplasmic reticulum	3/891	22/10468	0.287063	0.991216	0.991216	OS9/EDEM1/SLC35D3	3
BP	GO:0090102	cochlea development	3/891	22/10468	0.287063	0.991216	0.991216	ADAM10/IFT20/HES1	3
BP	GO:1901020	negative regulation of calcium ion transmembrane transporter activity	3/891	22/10468	0.287063	0.991216	0.991216	CALM1/TLR9/SRI	3
BP	GO:1902253	regulation of intrinsic apoptotic signaling pathway by p53 class mediator	3/891	22/10468	0.287063	0.991216	0.991216	MDM2/RPL26/ATAD5	3
BP	GO:1903115	regulation of actin filament-based movement	3/891	22/10468	0.287063	0.991216	0.991216	NOS1AP/TNNC1/SRI	3
BP	GO:1903539	protein localization to postsynaptic membrane	3/891	22/10468	0.287063	0.991216	0.991216	STX3/GPC6/ADAM10	3
BP	GO:2000104	negative regulation of DNA-dependent DNA replication	3/891	22/10468	0.287063	0.991216	0.991216	SMC3/BRCA2/BCL6	3
BP	GO:2000758	positive regulation of peptidyl-lysine acetylation	3/891	22/10468	0.287063	0.991216	0.991216	BRD7/KAT7/PAXIP1	3
BP	GO:0003229	ventricular cardiac muscle tissue development	4/891	32/10468	0.28808	0.991216	0.991216	TPM1/ID2/TNNC1/ZFPM2	4
BP	GO:0006101	citrate metabolic process	4/891	32/10468	0.28808	0.991216	0.991216	SDHB/SDHD/OGDH/ACO1	4
BP	GO:0006409	tRNA export from nucleus	4/891	32/10468	0.28808	0.991216	0.991216	NUP160/AAAS/SEH1L/NUP205	4
BP	GO:0007585	respiratory gaseous exchange	4/891	32/10468	0.28808	0.991216	0.991216	MAN1A2/FUT8/SLC5A3/TNNC1	4
BP	GO:0031952	regulation of protein autophosphorylation	4/891	32/10468	0.28808	0.991216	0.991216	CALM1/MVP/NBN/RAP2C	4
BP	GO:0045123	cellular extravasation	4/891	32/10468	0.28808	0.991216	0.991216	ITGB1/FADD/SELPLG/AGER	4
BP	GO:0045143	homologous chromosome segregation	4/891	32/10468	0.28808	0.991216	0.991216	ATM/DMC1/MEI1/CENPC	4
BP	GO:0048146	positive regulation of fibroblast proliferation	4/891	32/10468	0.28808	0.991216	0.991216	CDC6/FOSL2/CDK6/MYC	4
BP	GO:0048260	positive regulation of receptor-mediated endocytosis	4/891	32/10468	0.28808	0.991216	0.991216	RAB21/B2M/ARRB2/PICK1	4
BP	GO:0061035	regulation of cartilage development	4/891	32/10468	0.28808	0.991216	0.991216	PTHLH/AXIN2/FGF18/BMP1	4
BP	GO:0071431	tRNA-containing ribonucleoprotein complex export from nucleus	4/891	32/10468	0.28808	0.991216	0.991216	NUP160/AAAS/SEH1L/NUP205	4
BP	GO:0071985	multivesicular body sorting pathway	4/891	32/10468	0.28808	0.991216	0.991216	LEPROT/SORT1/VPS36/VPS37A	4
BP	GO:0097352	autophagosome maturation	4/891	32/10468	0.28808	0.991216	0.991216	TSG101/MAP1LC3B2/MAP1LC3B/EPG5	4
BP	GO:0120163	negative regulation of cold-induced thermogenesis	4/891	32/10468	0.28808	0.991216	0.991216	NR1H2/IL18R1/PLCL1/ATF4	4
BP	GO:1902107	positive regulation of leukocyte differentiation	10/891	95/10468	0.288223	0.991216	0.991216	HAX1/FADD/AP3D1/ID2/CASP8/RUNX1/BCL6/AGER/TMEM64/TRIB1	10
BP	GO:0015893	drug transport	11/891	106/10468	0.290633	0.991216	0.991216	TACR2/SLC25A15/AMN/SLC25A1/SLC25A38/SLC7A11/SLC22A5/GDF9/TAF7/MYC/TOR1A	11
BP	GO:0006959	humoral immune response	8/891	74/10468	0.292959	0.991216	0.991216	CFH/PHB/ST6GAL1/LEAP2/IL6/RPL30/LCN2/ATP7A	8
BP	GO:0034763	negative regulation of transmembrane transport	8/891	74/10468	0.292959	0.991216	0.991216	CTTNBP2NL/ISCU/CALM1/NEDD4/TLR9/GOPC/SRI/ATP7A	8
BP	GO:0050864	regulation of B cell activation	8/891	74/10468	0.292959	0.991216	0.991216	ATM/ATAD5/ID2/ZFP36L2/TLR9/BCL6/IL6/PAXIP1	8
BP	GO:0051196	regulation of coenzyme metabolic process	8/891	74/10468	0.292959	0.991216	0.991216	NUP160/AAAS/PDPR/PDK2/SEH1L/ME1/NUP205/SLC2A6	8
BP	GO:0097190	apoptotic signaling pathway	40/891	429/10468	0.293407	0.991216	0.991216	IFI6/EYA3/SFPQ/BCL10/SORT1/DEDD/IVNS1ABP/SGMS1/RAD9A/FADD/DDIAS/ATM/MDM2/BRCA2/RHOT2/ARRB2/RPL26/ATAD5/PCGF2/PDK2/PDCD5/CASP10/CASP8/CEBPB/ATF4/PDCD10/UBE2K/HINT1/BAK1/TMEM14A/PHIP/FOXO3/MAP3K5/SOD2/HIPK2/CUL1/NBN/YWHAZ/JAK2/LCN2	40
BP	GO:0000077	DNA damage checkpoint	13/891	128/10468	0.293523	0.991216	0.991216	DTL/INTS7/RAD9A/CCND1/ATM/MDM2/RAD9B/RBL2/RPL26/MAPK14/CNOT4/CNOT7/NBN	13
BP	GO:0034249	negative regulation of cellular amide metabolic process	13/891	128/10468	0.293523	0.991216	0.991216	SESN2/SRP9/EIF4EBP2/CPEB3/GGA3/TNRC6C/ZFP36/RPL13A/ZFP36L2/ATF4/CPEB2/CPEB4/CNOT7	13
BP	GO:0006403	RNA localization	20/891	205/10468	0.293607	0.991216	0.991216	SRRM1/SFPQ/AHCTF1/PRPF18/NUP160/ATM/AAAS/MVP/SEH1L/ZFP36/FBL/CCT8/U2AF1/POLDIP3/RBM15B/SDAD1/PHAX/HNRNPA2B1/NUP205/XPO7	20
BP	GO:0006913	nucleocytoplasmic transport	27/891	283/10468	0.294132	0.991216	0.991216	SRRM1/EFCAB7/SNRPE/FAM53B/NUP160/ZPR1/AAAS/MDM2/NEDD4/SEH1L/ANKLE1/SNRPG/U2AF1/POLDIP3/RBM15B/LSG1/SDAD1/PHAX/HSPA9/ATXN1/MAPK14/BACH2/HNRNPA2B1/NUP205/XPO7/UBR5/GEMIN8	27
BP	GO:0051236	establishment of RNA localization	17/891	172/10468	0.294784	0.991216	0.991216	SRRM1/SFPQ/AHCTF1/NUP160/ATM/AAAS/MVP/SEH1L/ZFP36/U2AF1/POLDIP3/RBM15B/SDAD1/PHAX/HNRNPA2B1/NUP205/XPO7	17
BP	GO:0046824	positive regulation of nucleocytoplasmic transport	6/891	53/10468	0.294794	0.991216	0.991216	EFCAB7/ZPR1/MDM2/NEDD4/MAPK14/UBR5	6
BP	GO:0048144	fibroblast proliferation	6/891	53/10468	0.294794	0.991216	0.991216	C1QL4/MED31/CDC6/FOSL2/CDK6/MYC	6
BP	GO:0048145	regulation of fibroblast proliferation	6/891	53/10468	0.294794	0.991216	0.991216	C1QL4/MED31/CDC6/FOSL2/CDK6/MYC	6
BP	GO:0072413	signal transduction involved in mitotic cell cycle checkpoint	6/891	53/10468	0.294794	0.991216	0.991216	ATM/MDM2/RBL2/RPL26/CNOT4/CNOT7	6
BP	GO:1902402	signal transduction involved in mitotic DNA damage checkpoint	6/891	53/10468	0.294794	0.991216	0.991216	ATM/MDM2/RBL2/RPL26/CNOT4/CNOT7	6
BP	GO:1902403	signal transduction involved in mitotic DNA integrity checkpoint	6/891	53/10468	0.294794	0.991216	0.991216	ATM/MDM2/RBL2/RPL26/CNOT4/CNOT7	6
BP	GO:2001056	positive regulation of cysteine-type endopeptidase activity	10/891	96/10468	0.299421	0.991216	0.991216	BCL10/FADD/PDCD5/CASP10/CASP8/FOXL2/BAK1/MAP3K5/MYC/JAK2	10
BP	GO:0072594	establishment of protein localization to organelle	42/891	453/10468	0.300655	0.991216	0.991216	EFCAB7/LEPROT/RPS27/HAX1/SRP9/NCOA4/FAM53B/RPL27A/TSG101/TIMM8B/ZPR1/RPL41/GNPTAB/BRCA2/VPS36/SRP14/NEDD4/RPL4/LONP2/RPL26/TIMM21/AP3D1/TIMM44/PDCD5/SAE1/RPL13A/RPS11/CASP8/CCT8/RPL3/BHLHE40-AS1/CHCHD4/PARL/AMACR/MAPK14/TOMM7/IMMP2L/VPS37A/RPL30/YWHAZ/UBR5/RPL35	42
BP	GO:0030098	lymphocyte differentiation	20/891	206/10468	0.301229	0.991216	0.991216	LEPR/IRF2BP2/ITGB1/FADD/ATM/TYRO3/B2M/AP3D1/ID2/ZFP36L2/IL18R1/RUNX1/TLR9/BCL6/FNIP1/BAK1/PRDM1/IL6/CDK6/ATP7A	20
BP	GO:0046328	regulation of JNK cascade	11/891	107/10468	0.301253	0.991216	0.991216	MAGI3/AIDA/MAP4K5/PHLPP1/TLR9/MECOM/AGER/MAP3K5/MAP3K4/HIPK2/COPS5	11
BP	GO:0006513	protein monoubiquitination	7/891	64/10468	0.301371	0.991216	0.991216	DTL/TSG101/PCGF2/ATXN7L3/RYBP/UBE3D/CUL1	7
BP	GO:0042273	ribosomal large subunit biogenesis	7/891	64/10468	0.301371	0.991216	0.991216	MRTO4/NVL/RPL26/RPL3/SDAD1/RPL7L1/RPL35	7
BP	GO:0042590	antigen processing and presentation of exogenous peptide antigen via MHC class I	7/891	64/10468	0.301371	0.991216	0.991216	PSMB4/PSMA1/B2M/PSMB3/PSMD3/PSMF1/PSMD5	7
BP	GO:0043500	muscle adaptation	7/891	64/10468	0.301371	0.991216	0.991216	CAMK2G/MEF2A/TNNC1/JARID2/FOXO3/GTF2IRD2/GTF2IRD2B	7
BP	GO:0046632	alpha-beta T cell differentiation	7/891	64/10468	0.301371	0.991216	0.991216	AP3D1/IL18R1/RUNX1/BCL6/PRDM1/IL6/ATP7A	7
BP	GO:0071887	leukocyte apoptotic process	7/891	64/10468	0.301371	0.991216	0.991216	BCL10/FADD/BCL6/SLC7A11/FNIP1/BAK1/IL6	7
BP	GO:0090114	COPII-coated vesicle budding	7/891	64/10468	0.301371	0.991216	0.991216	TMED2/SEC23A/MCFD2/SEC31A/SEC24B/SEC24D/GOLGA2	7
BP	GO:0002673	regulation of acute inflammatory response	5/891	43/10468	0.301784	0.991216	0.991216	PTGER3/CFH/PHB/OSMR/IL6	5
BP	GO:0003151	outflow tract morphogenesis	5/891	43/10468	0.301784	0.991216	0.991216	DHRS3/HES1/SEC24B/CITED2/ZFPM2	5
BP	GO:0008344	adult locomotory behavior	5/891	43/10468	0.301784	0.991216	0.991216	ARRB2/SPTBN4/ID2/FOXA2/HIPK2	5
BP	GO:0014812	muscle cell migration	5/891	43/10468	0.301784	0.991216	0.991216	MDM2/TPM1/PLXNA1/TRIB1/ATP7A	5
BP	GO:0042116	macrophage activation	5/891	43/10468	0.301784	0.991216	0.991216	ATM/AGER/IL6/NAMPT/JAK2	5
BP	GO:0046148	pigment biosynthetic process	5/891	43/10468	0.301784	0.991216	0.991216	UROD/APRT/SLC25A38/CPOX/SLC7A11	5
BP	GO:0061180	mammary gland epithelium development	5/891	43/10468	0.301784	0.991216	0.991216	CCND1/BRCA2/ID2/CEBPB/JAK2	5
BP	GO:1903035	negative regulation of response to wounding	5/891	43/10468	0.301784	0.991216	0.991216	LRIG2/THBD/CLASP2/AGER/ADTRP	5
BP	GO:1903201	regulation of oxidative stress-induced cell death	5/891	43/10468	0.301784	0.991216	0.991216	SFPQ/ATF4/SLC7A11/FOXO3/SOD2	5
BP	GO:0002703	regulation of leukocyte mediated immunity	12/891	118/10468	0.302465	0.991216	0.991216	XCL1/FADD/B2M/ARRB2/ATAD5/IL18R1/BCL6/AGER/STX7/ULBP2/IL6/PAXIP1	12
BP	GO:0001822	kidney development	14/891	140/10468	0.30357	0.991216	0.991216	ARID5B/CDKN1C/NUP160/FADD/GDF11/MMP17/ALDH1A2/IFT20/ID2/ODC1/NPHP3/TIPARP/HES1/MYC	14
BP	GO:0006338	chromatin remodeling	14/891	140/10468	0.30357	0.991216	0.991216	NASP/ITGB3BP/VPS72/CENPL/SMARCC2/OIP5/INO80C/KMT2B/CENPO/HJURP/CENPC/JARID2/CBX3/MYC	14
BP	GO:0007033	vacuole organization	14/891	140/10468	0.30357	0.991216	0.991216	GBA/PIP4K2A/ATG2A/GNPTAB/MAP1LC3B2/VPS18/AKTIP/MAP1LC3B/IFT20/WIPI1/ATG16L1/TP53INP2/NPRL2/ATG12	14
BP	GO:0070302	regulation of stress-activated protein kinase signaling cascade	14/891	140/10468	0.30357	0.991216	0.991216	MAGI3/AIDA/MAP4K5/PHLPP1/TLR9/PDCD10/MECOM/AGER/MAP3K5/MAP3K4/KLHDC10/HIPK2/COPS5/MYC	14
BP	GO:0042113	B cell activation	15/891	151/10468	0.303643	0.991216	0.991216	IRF2BP2/ITGB1/ATM/UNG/ATAD5/ID2/ZFP36L2/CASP8/TLR9/BCL6/FNIP1/BAK1/IL6/PAXIP1/NBN	15
BP	GO:2000027	regulation of animal organ morphogenesis	15/891	151/10468	0.303643	0.991216	0.991216	PSMB4/PSMA1/GLI1/GPC6/ARRB2/PSMB3/PSMD3/AP2S1/PSMF1/NPHP3/HES1/SEC24B/CITED2/MYC/PSMD5	15
BP	GO:0001325	formation of extrachromosomal circular DNA	2/891	13/10468	0.304915	0.991216	0.991216	XRCC5/NBN	2
BP	GO:0002320	lymphoid progenitor cell differentiation	2/891	13/10468	0.304915	0.991216	0.991216	HES1/FNIP1	2
BP	GO:0006268	DNA unwinding involved in DNA replication	2/891	13/10468	0.304915	0.991216	0.991216	RAD51/RECQL4	2
BP	GO:0006925	inflammatory cell apoptotic process	2/891	13/10468	0.304915	0.991216	0.991216	SLC7A11/IL6	2
BP	GO:0009208	pyrimidine ribonucleoside triphosphate metabolic process	2/891	13/10468	0.304915	0.991216	0.991216	NME1/UCKL1	2
BP	GO:0010042	response to manganese ion	2/891	13/10468	0.304915	0.991216	0.991216	ATF4/ATP7A	2
BP	GO:0010575	positive regulation of vascular endothelial growth factor production	2/891	13/10468	0.304915	0.991216	0.991216	ATF4/IL6	2
BP	GO:0016056	rhodopsin mediated signaling pathway	2/891	13/10468	0.304915	0.991216	0.991216	CALM1/FNTA	2
BP	GO:0019377	glycolipid catabolic process	2/891	13/10468	0.304915	0.991216	0.991216	GBA/GM2A	2
BP	GO:0030575	nuclear body organization	2/891	13/10468	0.304915	0.991216	0.991216	ZPR1/HIPK2	2
BP	GO:0032228	regulation of synaptic transmission, GABAergic	2/891	13/10468	0.304915	0.991216	0.991216	PLCL1/NISCH	2
BP	GO:0034755	iron ion transmembrane transport	2/891	13/10468	0.304915	0.991216	0.991216	ISCU/ATP7A	2
BP	GO:0035278	miRNA mediated inhibition of translation	2/891	13/10468	0.304915	0.991216	0.991216	TNRC6C/ZFP36	2
BP	GO:0035357	peroxisome proliferator activated receptor signaling pathway	2/891	13/10468	0.304915	0.991216	0.991216	ACTN4/CITED2	2
BP	GO:0040033	negative regulation of translation, ncRNA-mediated	2/891	13/10468	0.304915	0.991216	0.991216	TNRC6C/ZFP36	2
BP	GO:0045655	regulation of monocyte differentiation	2/891	13/10468	0.304915	0.991216	0.991216	CDK6/MYC	2
BP	GO:0045686	negative regulation of glial cell differentiation	2/891	13/10468	0.304915	0.991216	0.991216	ID2/HES1	2
BP	GO:0045974	regulation of translation, ncRNA-mediated	2/891	13/10468	0.304915	0.991216	0.991216	TNRC6C/ZFP36	2
BP	GO:0046606	negative regulation of centrosome cycle	2/891	13/10468	0.304915	0.991216	0.991216	NEK2/NUBP1	2
BP	GO:0048566	embryonic digestive tract development	2/891	13/10468	0.304915	0.991216	0.991216	ALDH1A2/ID2	2
BP	GO:0051299	centrosome separation	2/891	13/10468	0.304915	0.991216	0.991216	NEK2/RANBP1	2
BP	GO:0071850	mitotic cell cycle arrest	2/891	13/10468	0.304915	0.991216	0.991216	CDC14A/DDIAS	2
BP	GO:0086064	cell communication by electrical coupling involved in cardiac conduction	2/891	13/10468	0.304915	0.991216	0.991216	CALM1/SRI	2
BP	GO:0090051	negative regulation of cell migration involved in sprouting angiogenesis	2/891	13/10468	0.304915	0.991216	0.991216	SPRED1/PDCD10	2
BP	GO:0090656	t-circle formation	2/891	13/10468	0.304915	0.991216	0.991216	XRCC5/NBN	2
BP	GO:0090737	telomere maintenance via telomere trimming	2/891	13/10468	0.304915	0.991216	0.991216	XRCC5/NBN	2
BP	GO:1902165	regulation of intrinsic apoptotic signaling pathway in response to DNA damage by p53 class mediator	2/891	13/10468	0.304915	0.991216	0.991216	RPL26/ATAD5	2
BP	GO:1904152	regulation of retrograde protein transport, ER to cytosol	2/891	13/10468	0.304915	0.991216	0.991216	OS9/EDEM1	2
BP	GO:1904293	negative regulation of ERAD pathway	2/891	13/10468	0.304915	0.991216	0.991216	OS9/USP25	2
BP	GO:2000010	positive regulation of protein localization to cell surface	2/891	13/10468	0.304915	0.991216	0.991216	LRIG2/STX3	2
BP	GO:0001666	response to hypoxia	23/891	240/10468	0.305607	0.991216	0.991216	PSMB4/PSMA1/ATM/MDM2/AJUBA/TGFB3/PSMB3/PSMD3/ACTN4/EPAS1/PSMF1/AHCY/BACH1/ADSL/CPEB2/STC2/AGER/FOXO3/CITED2/HIPK2/MYC/PSMD5/ATP7A	23
BP	GO:0008593	regulation of Notch signaling pathway	8/891	75/10468	0.305783	0.991216	0.991216	ELF3/TSPAN14/MAML2/ADAM10/PDCD10/BCL6/HES1/MAML3	8
BP	GO:0071363	cellular response to growth factor stimulus	38/891	409/10468	0.307394	0.991216	0.991216	NBL1/SORT1/XCL1/BAMBI/CDKN1C/ZPR1/BCL9L/MDM2/ARPC3/FUT8/TGFB3/SPRED1/NEDD4/RNF111/ARRB2/MAP2K3/MTMR4/TGIF1/DAND5/PDCD5/ZFP36/EID2/AKT1S1/LTBP1/ZFP36L2/TMEM108/HES1/GDF9/NR3C1/FGF18/HIVEP1/MAPK14/FRS3/FOXO3/CITED2/HIPK2/FNTA/ATP7A	38
BP	GO:0002011	morphogenesis of an epithelial sheet	4/891	33/10468	0.307837	0.991216	0.991216	AJUBA/CLASP2/PDCD10/TOR1A	4
BP	GO:0043489	RNA stabilization	4/891	33/10468	0.307837	0.991216	0.991216	AXIN2/ZFP36/RBM38/MAPK14	4
BP	GO:0010469	regulation of signaling receptor activity	9/891	86/10468	0.308757	0.991216	0.991216	ITGB1/TSG101/ESR2/NETO2/CHMP6/ZGPAT/NCAPG2/FNTA/DLG3	9
BP	GO:0046794	transport of virus	6/891	54/10468	0.310083	0.991216	0.991216	TSG101/NUP160/AAAS/SEH1L/NUP205/VPS37A	6
BP	GO:0060349	bone morphogenesis	6/891	54/10468	0.310083	0.991216	0.991216	DHRS3/TGFB3/CHSY1/AXIN2/IFT80/FGF18	6
BP	GO:1901570	fatty acid derivative biosynthetic process	6/891	54/10468	0.310083	0.991216	0.991216	FAR1/GGT7/SLC25A1/MGST2/ACSL6/TBXAS1	6
BP	GO:0006022	aminoglycan metabolic process	10/891	97/10468	0.310728	0.991216	0.991216	CSGALNACT2/EXT2/GPC6/CHSY1/HS3ST3A1/B3GNT2/GALNT5/PXYLP1/IDUA/EGFLAM	10
BP	GO:0007006	mitochondrial membrane organization	10/891	97/10468	0.310728	0.991216	0.991216	STPG1/RHOT2/SPG7/AFG3L2/PDCD5/CASP8/BAK1/TMEM14A/YWHAZ/APOO	10
BP	GO:0006471	protein ADP-ribosylation	3/891	23/10468	0.311128	0.991216	0.991216	PNKP/PARP14/TIPARP	3
BP	GO:0010971	positive regulation of G2/M transition of mitotic cell cycle	3/891	23/10468	0.311128	0.991216	0.991216	CDC7/DTL/CCND1	3
BP	GO:0030201	heparan sulfate proteoglycan metabolic process	3/891	23/10468	0.311128	0.991216	0.991216	EXT2/HS3ST3A1/PXYLP1	3
BP	GO:0031572	G2 DNA damage checkpoint	3/891	23/10468	0.311128	0.991216	0.991216	DTL/ATM/NBN	3
BP	GO:0045191	regulation of isotype switching	3/891	23/10468	0.311128	0.991216	0.991216	ATAD5/BCL6/PAXIP1	3
BP	GO:0051150	regulation of smooth muscle cell differentiation	3/891	23/10468	0.311128	0.991216	0.991216	OLFM2/MED28/SOD2	3
BP	GO:0051281	positive regulation of release of sequestered calcium ion into cytosol	3/891	23/10468	0.311128	0.991216	0.991216	XCL1/CALM1/SRI	3
BP	GO:0060421	positive regulation of heart growth	3/891	23/10468	0.311128	0.991216	0.991216	GLI1/MAPK14/ZFPM2	3
BP	GO:0019827	stem cell population maintenance	11/891	108/10468	0.311973	0.991216	0.991216	FOXD3/VPS72/SMC3/BCL9L/SETD6/ZFP36L2/HES1/MED28/FOXO3/PCM1/ZNF706	11
BP	GO:0042176	regulation of protein catabolic process	28/891	297/10468	0.312165	0.991216	0.991216	AZIN2/LRIG2/GBA/DTL/OS9/MDM2/NEDD4/N4BP1/PSMD3/PHB/TLK2/GGA3/CHMP6/ODC1/TRIB2/PSMF1/USP25/EDEM1/RYBP/TIPARP/FBXL5/UBE2K/CSNK1A1/MYLIP/CYP51A1/ANKIB1/HIPK2/TRIB1	28
BP	GO:0051271	negative regulation of cellular component movement	16/891	163/10468	0.312183	0.991216	0.991216	NBL1/PTPRU/ARID2/SPRED1/TPM1/ACTN4/CLASP2/NISCH/PDCD10/ADTRP/FOXO3/CITED2/KRIT1/TRIB1/SCAI/RAP2C	16
BP	GO:0006090	pyruvate metabolic process	12/891	119/10468	0.312677	0.991216	0.991216	MPC2/HKDC1/NUP160/AAAS/ADPGK/PDPR/PDK2/SEH1L/ME1/OGDH/NUP205/SLC2A6	12
BP	GO:0051169	nuclear transport	27/891	286/10468	0.313742	0.991216	0.991216	SRRM1/EFCAB7/SNRPE/FAM53B/NUP160/ZPR1/AAAS/MDM2/NEDD4/SEH1L/ANKLE1/SNRPG/U2AF1/POLDIP3/RBM15B/LSG1/SDAD1/PHAX/HSPA9/ATXN1/MAPK14/BACH2/HNRNPA2B1/NUP205/XPO7/UBR5/GEMIN8	27
BP	GO:0030534	adult behavior	7/891	65/10468	0.315345	0.991216	0.991216	FADD/ARRB2/SPTBN4/ID2/FOXA2/SLC7A11/HIPK2	7
BP	GO:0072395	signal transduction involved in cell cycle checkpoint	7/891	65/10468	0.315345	0.991216	0.991216	DTL/ATM/MDM2/RBL2/RPL26/CNOT4/CNOT7	7
BP	GO:0072401	signal transduction involved in DNA integrity checkpoint	7/891	65/10468	0.315345	0.991216	0.991216	DTL/ATM/MDM2/RBL2/RPL26/CNOT4/CNOT7	7
BP	GO:0072422	signal transduction involved in DNA damage checkpoint	7/891	65/10468	0.315345	0.991216	0.991216	DTL/ATM/MDM2/RBL2/RPL26/CNOT4/CNOT7	7
BP	GO:1901606	alpha-amino acid catabolic process	7/891	65/10468	0.315345	0.991216	0.991216	ALDH4A1/GLUL/PCBD1/FAH/GAD1/AHCY/OGDH	7
BP	GO:0009895	negative regulation of catabolic process	21/891	219/10468	0.315402	0.991216	0.991216	AZIN2/LEPR/LRIG2/QSOX1/PDE3B/OS9/N4BP1/PHB/TLK2/AXIN2/ZFP36/PSMF1/RBM38/USP25/RYBP/MAPK14/CYP51A1/NAMPT/HIPK2/SECISBP2/GOLGA2	21
BP	GO:0050673	epithelial cell proliferation	20/891	208/10468	0.316656	0.991216	0.991216	GLUL/CDKN1C/CCND1/GLI1/BRCA2/B2M/ALDH1A2/NME1/ZFP36/ID2/CEBPB/IFT80/PDCD10/HES1/C6orf89/KRIT1/CDK6/THAP1/MYC/ATP7A	20
BP	GO:0009152	purine ribonucleotide biosynthetic process	19/891	197/10468	0.317852	0.991216	0.991216	MPC2/HKDC1/NUP160/AAAS/ADPGK/PDPR/APRT/PDK2/NME1/SEH1L/ACSS2/SLC25A1/ADSL/SLC26A1/ACSL6/SLC35B3/OGDH/NUP205/SLC2A6	19
BP	GO:0007612	learning	8/891	76/10468	0.318725	0.991216	0.991216	ITGB1/TACR2/AAAS/MEIS2/IFT20/SLC7A11/ATXN1/VDAC3	8
BP	GO:0051384	response to glucocorticoid	8/891	76/10468	0.318725	0.991216	0.991216	PTPRU/GBA/CCND1/ZFP36/ZFP36L2/NR3C1/FOXO3/IL6	8
BP	GO:0043624	cellular protein complex disassembly	18/891	186/10468	0.318978	0.991216	0.991216	CAPZA1/MRPS16/MRPL49/CKAP2/MRPS7/MRPL38/MRPL4/MRPS12/SPTBN4/SPEF1/MRPS6/CLASP2/VILL/MRPS22/MRPL22/MRPS10/MRPS33/MRPS28	18
BP	GO:0055017	cardiac muscle tissue growth	5/891	44/10468	0.318981	0.991216	0.991216	ARID2/GLI1/JARID2/MAPK14/ZFPM2	5
BP	GO:1901224	positive regulation of NIK/NF-kappaB signaling	5/891	44/10468	0.318981	0.991216	0.991216	ZFP91/ACTN4/IL18R1/TLR9/AGER	5
BP	GO:0006281	DNA repair	43/891	468/10468	0.319673	0.991216	0.991216	EYA3/SFPQ/ADPRHL2/CDC7/DTL/SFR1/SMC3/GTF2H1/KAT5/RAD9A/ATM/ALKBH2/UNG/RAD9B/BRCA2/ERCC5/RAD51/RNF111/ERCC4/RAD51D/AXIN2/SPIRE1/INO80C/ANKLE1/PNKP/XRCC5/BACH1/CDC45/DMC1/POLN/PDS5A/WRNIP1/DEK/REV3L/SHPRH/NUDT1/PMS2/PAXIP1/COPS5/NBN/UBR5/RECQL4/SWI5	43
BP	GO:0006413	translational initiation	17/891	175/10468	0.320019	0.991216	0.991216	RPS27/EIF2D/EIF4EBP2/RPL27A/RPL41/MTFMT/RPL4/RPL26/RPL13A/RPS11/RPL3/ATF4/EIF1B/EIF4E3/COPS5/RPL30/RPL35	17
BP	GO:0060485	mesenchyme development	15/891	153/10468	0.321754	0.991216	0.991216	BAMBI/BCL9L/MDM2/TGFB3/ALDH1A2/AXIN2/DAND5/FOXA2/CLASP2/HES1/CITED2/IL6/ZFPM2/MYC/EFNB1	15
BP	GO:0043524	negative regulation of neuron apoptotic process	10/891	98/10468	0.322133	0.991216	0.991216	ZPR1/TGFB3/TYRO3/ARRB2/CEBPB/CPEB4/SOD2/HIPK2/JAK2/SET	10
BP	GO:0050670	regulation of lymphocyte proliferation	11/891	109/10468	0.322783	0.991216	0.991216	XCL1/FADD/ATM/ATAD5/CEBPB/TLR9/BCL6/HES1/AGER/IL6/EFNB1	11
BP	GO:0051053	negative regulation of DNA metabolic process	11/891	109/10468	0.322783	0.991216	0.991216	SMC3/ATM/BRCA2/ERCC4/CDC6/XRCC5/BCL6/PDS5A/PINX1/NBN/UBR5	11
BP	GO:0098727	maintenance of cell number	11/891	109/10468	0.322783	0.991216	0.991216	FOXD3/VPS72/SMC3/BCL9L/SETD6/ZFP36L2/HES1/MED28/FOXO3/PCM1/ZNF706	11
BP	GO:0009952	anterior/posterior pattern specification	12/891	120/10468	0.322973	0.991216	0.991216	ATM/GDF11/TMED2/ALDH1A2/PCGF2/HOXB5/AXIN2/FOXA2/ETS2/BHLHE40/HES1/HIPK2	12
BP	GO:0009260	ribonucleotide biosynthetic process	20/891	209/10468	0.324453	0.991216	0.991216	MPC2/HKDC1/NUP160/AAAS/ADPGK/PDPR/APRT/PDK2/NME1/SEH1L/ACSS2/UCKL1/SLC25A1/ADSL/SLC26A1/ACSL6/SLC35B3/OGDH/NUP205/SLC2A6	20
BP	GO:1901214	regulation of neuron death	20/891	209/10468	0.324453	0.991216	0.991216	GBA/ATM/ZPR1/TGFB3/TYRO3/ARRB2/CDK5R1/AKT1S1/CASP8/CEBPB/ATF4/SLC7A11/CPEB4/FOXO3/MAP3K5/SOD2/AIMP2/HIPK2/JAK2/SET	20
BP	GO:0043242	negative regulation of protein complex disassembly	6/891	55/10468	0.325501	0.991216	0.991216	CAPZA1/CKAP2/SPTBN4/SPEF1/CLASP2/VILL	6
BP	GO:1901983	regulation of protein acetylation	6/891	55/10468	0.325501	0.991216	0.991216	KAT5/BRD7/KAT7/TAF7/PAXIP1/SET	6
BP	GO:0001961	positive regulation of cytokine-mediated signaling pathway	4/891	34/10468	0.327722	0.991216	0.991216	FADD/PARP14/UBE2K/TXK	4
BP	GO:0002042	cell migration involved in sprouting angiogenesis	4/891	34/10468	0.327722	0.991216	0.991216	ITGB1/SPRED1/PDCD10/ADTRP	4
BP	GO:0002712	regulation of B cell mediated immunity	4/891	34/10468	0.327722	0.991216	0.991216	XCL1/ATAD5/BCL6/PAXIP1	4
BP	GO:0002889	regulation of immunoglobulin mediated immune response	4/891	34/10468	0.327722	0.991216	0.991216	XCL1/ATAD5/BCL6/PAXIP1	4
BP	GO:0009225	nucleotide-sugar metabolic process	4/891	34/10468	0.327722	0.991216	0.991216	DPAGT1/GNPNAT1/FUT8/MGAT1	4
BP	GO:0034260	negative regulation of GTPase activity	4/891	34/10468	0.327722	0.991216	0.991216	FICD/TMED2/ARRB2/CPEB2	4
BP	GO:0034656	nucleobase-containing small molecule catabolic process	4/891	34/10468	0.327722	0.991216	0.991216	HDDC3/AHCY/MGAT1/NUDT1	4
BP	GO:0035307	positive regulation of protein dephosphorylation	4/891	34/10468	0.327722	0.991216	0.991216	GBA/SMPD1/CALM1/JAK2	4
BP	GO:0035904	aorta development	4/891	34/10468	0.327722	0.991216	0.991216	LTBP1/HES1/SEC24B/PRDM1	4
BP	GO:0044275	cellular carbohydrate catabolic process	4/891	34/10468	0.327722	0.991216	0.991216	CALM1/PHKB/PPP1R3B/IDNK	4
BP	GO:0048844	artery morphogenesis	4/891	34/10468	0.327722	0.991216	0.991216	ARID2/HES1/SEC24B/PRDM1	4
BP	GO:0051031	tRNA transport	4/891	34/10468	0.327722	0.991216	0.991216	NUP160/AAAS/SEH1L/NUP205	4
BP	GO:0060324	face development	4/891	34/10468	0.327722	0.991216	0.991216	ARID5B/TGFB3/ALDH1A2/TIPARP	4
BP	GO:0071385	cellular response to glucocorticoid stimulus	4/891	34/10468	0.327722	0.991216	0.991216	ZFP36/ZFP36L2/NR3C1/FOXO3	4
BP	GO:0090311	regulation of protein deacetylation	4/891	34/10468	0.327722	0.991216	0.991216	SPRED1/BCL6/C6orf89/FNTA	4
BP	GO:0044057	regulation of system process	26/891	277/10468	0.328898	0.991216	0.991216	PTGER3/GBA/NOS1AP/TACR2/CAMK2G/MDM2/CALM1/TPM1/MEF2A/MTMR4/SPTBN4/EPAS1/TNNC1/TMEM108/FOXL2/MYL5/SLC22A5/GDF9/AGER/JARID2/FOXO3/GTF2IRD2/GTF2IRD2B/SRI/TMEM65/JAK2	26
BP	GO:0006487	protein N-linked glycosylation	7/891	66/10468	0.329432	0.991216	0.991216	ALG9/DPAGT1/FUT8/MGAT5B/MCFD2/ST6GAL1/MGAT1	7
BP	GO:0008037	cell recognition	7/891	66/10468	0.329432	0.991216	0.991216	ROBO3/MFGE8/CDK5R1/CATSPERG/CCT8/POMZP3/YWHAZ	7
BP	GO:0016064	immunoglobulin mediated immune response	7/891	66/10468	0.329432	0.991216	0.991216	BCL10/XCL1/UNG/ATAD5/BCL6/PAXIP1/NBN	7
BP	GO:0050680	negative regulation of epithelial cell proliferation	7/891	66/10468	0.329432	0.991216	0.991216	CDKN1C/BRCA2/B2M/IFT80/PDCD10/KRIT1/CDK6	7
BP	GO:0051289	protein homotetramerization	7/891	66/10468	0.329432	0.991216	0.991216	PCBD1/B2M/ALDH1A2/PCBD2/SOD2/DECR1/GOLGA2	7
BP	GO:0007517	muscle organ development	21/891	221/10468	0.330626	0.991216	0.991216	IGSF8/ZBTB18/ARID5B/BCL9L/GLI1/TCF12/TPM1/UNC45A/MEF2A/PRR14/ARRB2/EID2/FOXN2/TNNC1/FOXL2/JARID2/MAPK14/CD164/SRI/ACHE/ZFPM2	21
BP	GO:0045926	negative regulation of growth	14/891	143/10468	0.331906	0.991216	0.991216	SESN2/ST7L/BTG1/SOCS2/ESR2/RAI1/CRLF3/CDK5R1/PHB/BCL6/JADE1/GDF9/STC2/JARID2	14
BP	GO:0071346	cellular response to interferon-gamma	9/891	88/10468	0.333057	0.991216	0.991216	CD58/XCL1/CAMK2G/B2M/RPL13A/NR1H2/PARP14/TXK/JAK2	9
BP	GO:0051494	negative regulation of cytoskeleton organization	10/891	99/10468	0.333623	0.991216	0.991216	CAPZA1/NEK2/CKAP2/NUBP1/SPTBN4/EML2/SPEF1/PICK1/CLASP2/VILL	10
BP	GO:0032944	regulation of mononuclear cell proliferation	11/891	110/10468	0.333674	0.991216	0.991216	XCL1/FADD/ATM/ATAD5/CEBPB/TLR9/BCL6/HES1/AGER/IL6/EFNB1	11
BP	GO:0002714	positive regulation of B cell mediated immunity	3/891	24/10468	0.335244	0.991216	0.991216	XCL1/ATAD5/PAXIP1	3
BP	GO:0002891	positive regulation of immunoglobulin mediated immune response	3/891	24/10468	0.335244	0.991216	0.991216	XCL1/ATAD5/PAXIP1	3
BP	GO:0007020	microtubule nucleation	3/891	24/10468	0.335244	0.991216	0.991216	EML2/CLASP2/GOLGA2	3
BP	GO:0007566	embryo implantation	3/891	24/10468	0.335244	0.991216	0.991216	UBE2Q1/HMX3/STC2	3
BP	GO:0009649	entrainment of circadian clock	3/891	24/10468	0.335244	0.991216	0.991216	PHLPP1/ID2/BHLHE40	3
BP	GO:0009948	anterior/posterior axis specification	3/891	24/10468	0.335244	0.991216	0.991216	TMED2/FOXA2/ETS2	3
BP	GO:0015695	organic cation transport	3/891	24/10468	0.335244	0.991216	0.991216	AZIN2/TACR2/SLC22A5	3
BP	GO:0016180	snRNA processing	3/891	24/10468	0.335244	0.991216	0.991216	INTS7/USB1/INTS12	3
BP	GO:0030149	sphingolipid catabolic process	3/891	24/10468	0.335244	0.991216	0.991216	GBA/SMPD1/GM2A	3
BP	GO:0030890	positive regulation of B cell proliferation	3/891	24/10468	0.335244	0.991216	0.991216	ATAD5/TLR9/BCL6	3
BP	GO:0032330	regulation of chondrocyte differentiation	3/891	24/10468	0.335244	0.991216	0.991216	PTHLH/AXIN2/FGF18	3
BP	GO:0034113	heterotypic cell-cell adhesion	3/891	24/10468	0.335244	0.991216	0.991216	CD58/ITGB1/AGER	3
BP	GO:0036003	positive regulation of transcription from RNA polymerase II promoter in response to stress	3/891	24/10468	0.335244	0.991216	0.991216	SESN2/CEBPB/ATF4	3
BP	GO:0044818	mitotic G2/M transition checkpoint	3/891	24/10468	0.335244	0.991216	0.991216	ATM/CDC6/NBN	3
BP	GO:0045648	positive regulation of erythrocyte differentiation	3/891	24/10468	0.335244	0.991216	0.991216	ID2/MAPK14/FOXO3	3
BP	GO:0046755	viral budding	3/891	24/10468	0.335244	0.991216	0.991216	TSG101/CHMP6/VPS37A	3
BP	GO:0048384	retinoic acid receptor signaling pathway	3/891	24/10468	0.335244	0.991216	0.991216	DHRS3/ALDH1A2/ACTN4	3
BP	GO:0097009	energy homeostasis	3/891	24/10468	0.335244	0.991216	0.991216	LEPR/PRCP/SLC35D3	3
BP	GO:0002758	innate immune response-activating signal transduction	18/891	188/10468	0.335575	0.991216	0.991216	BCL10/PSMB4/TLR5/PSMA1/UNC93B1/FADD/TYRO3/ARRB2/PSMB3/PSMD3/EPG5/CASP8/PSMF1/MAPKAPK3/TLR9/CUL1/LRRC14/PSMD5	18
BP	GO:0001570	vasculogenesis	5/891	45/10468	0.33629	0.991216	0.991216	WARS2/SPRED1/TIPARP/PAXIP1/ZFPM2	5
BP	GO:0001836	release of cytochrome c from mitochondria	5/891	45/10468	0.33629	0.991216	0.991216	IFI6/ARRB2/PDCD5/BAK1/SOD2	5
BP	GO:0006826	iron ion transport	5/891	45/10468	0.33629	0.991216	0.991216	ISCU/B2M/ATP6V0E1/ATP6V1G2/ATP7A	5
BP	GO:0007589	body fluid secretion	5/891	45/10468	0.33629	0.991216	0.991216	CCND1/SOCS2/APRT/NME1/ATP7A	5
BP	GO:0016574	histone ubiquitination	5/891	45/10468	0.33629	0.991216	0.991216	PCGF2/ATXN7L3/RYBP/UBR2/UBR5	5
BP	GO:0000463	maturation of LSU-rRNA from tricistronic rRNA transcript (SSU-rRNA, 5.8S rRNA, LSU-rRNA)	2/891	14/10468	0.337323	0.991216	0.991216	RPL7L1/RPL35	2
BP	GO:0002092	positive regulation of receptor internalization	2/891	14/10468	0.337323	0.991216	0.991216	ARRB2/PICK1	2
BP	GO:0002691	regulation of cellular extravasation	2/891	14/10468	0.337323	0.991216	0.991216	FADD/AGER	2
BP	GO:0002827	positive regulation of T-helper 1 type immune response	2/891	14/10468	0.337323	0.991216	0.991216	XCL1/IL18R1	2
BP	GO:0002861	regulation of inflammatory response to antigenic stimulus	2/891	14/10468	0.337323	0.991216	0.991216	PSMB4/PSMA1	2
BP	GO:0006390	mitochondrial transcription	2/891	14/10468	0.337323	0.991216	0.991216	FOXO3/MTERF1	2
BP	GO:0006474	N-terminal protein amino acid acetylation	2/891	14/10468	0.337323	0.991216	0.991216	NAA25/NAA16	2
BP	GO:0006595	polyamine metabolic process	2/891	14/10468	0.337323	0.991216	0.991216	AZIN2/ODC1	2
BP	GO:0007095	mitotic G2 DNA damage checkpoint	2/891	14/10468	0.337323	0.991216	0.991216	ATM/NBN	2
BP	GO:0007435	salivary gland morphogenesis	2/891	14/10468	0.337323	0.991216	0.991216	TGFB3/PLXNA1	2
BP	GO:0010714	positive regulation of collagen metabolic process	2/891	14/10468	0.337323	0.991216	0.991216	TGFB3/ARRB2	2
BP	GO:0010880	regulation of release of sequestered calcium ion into cytosol by sarcoplasmic reticulum	2/891	14/10468	0.337323	0.991216	0.991216	CALM1/SRI	2
BP	GO:0014911	positive regulation of smooth muscle cell migration	2/891	14/10468	0.337323	0.991216	0.991216	MDM2/ATP7A	2
BP	GO:0016446	somatic hypermutation of immunoglobulin genes	2/891	14/10468	0.337323	0.991216	0.991216	UNG/PMS2	2
BP	GO:0018904	ether metabolic process	2/891	14/10468	0.337323	0.991216	0.991216	FAR1/DHRS7B	2
BP	GO:0031573	intra-S DNA damage checkpoint	2/891	14/10468	0.337323	0.991216	0.991216	RAD9A/RAD9B	2
BP	GO:0032967	positive regulation of collagen biosynthetic process	2/891	14/10468	0.337323	0.991216	0.991216	TGFB3/ARRB2	2
BP	GO:0034123	positive regulation of toll-like receptor signaling pathway	2/891	14/10468	0.337323	0.991216	0.991216	TLR5/TLR9	2
BP	GO:0035067	negative regulation of histone acetylation	2/891	14/10468	0.337323	0.991216	0.991216	TAF7/SET	2
BP	GO:0035767	endothelial cell chemotaxis	2/891	14/10468	0.337323	0.991216	0.991216	RAB13/FGF18	2
BP	GO:0035902	response to immobilization stress	2/891	14/10468	0.337323	0.991216	0.991216	MDM2/FOXO3	2
BP	GO:0042401	cellular biogenic amine biosynthetic process	2/891	14/10468	0.337323	0.991216	0.991216	AZIN2/ODC1	2
BP	GO:0042407	cristae formation	2/891	14/10468	0.337323	0.991216	0.991216	AFG3L2/APOO	2
BP	GO:0043090	amino acid import	2/891	14/10468	0.337323	0.991216	0.991216	SLC25A38/SLC7A11	2
BP	GO:0044321	response to leptin	2/891	14/10468	0.337323	0.991216	0.991216	LEPR/CCND1	2
BP	GO:0044794	positive regulation by host of viral process	2/891	14/10468	0.337323	0.991216	0.991216	SMC3/YTHDC2	2
BP	GO:0045777	positive regulation of blood pressure	2/891	14/10468	0.337323	0.991216	0.991216	TPM1/ID2	2
BP	GO:0045823	positive regulation of heart contraction	2/891	14/10468	0.337323	0.991216	0.991216	NOS1AP/TPM1	2
BP	GO:0048268	clathrin coat assembly	2/891	14/10468	0.337323	0.991216	0.991216	AP2S1/CLTB	2
BP	GO:0060143	positive regulation of syncytium formation by plasma membrane fusion	2/891	14/10468	0.337323	0.991216	0.991216	EHD2/MAPK14	2
BP	GO:0060544	regulation of necroptotic process	2/891	14/10468	0.337323	0.991216	0.991216	FADD/CASP8	2
BP	GO:0060716	labyrinthine layer blood vessel development	2/891	14/10468	0.337323	0.991216	0.991216	TMED2/HES1	2
BP	GO:0062033	positive regulation of mitotic sister chromatid segregation	2/891	14/10468	0.337323	0.991216	0.991216	CDT1/ANAPC4	2
BP	GO:0071711	basement membrane organization	2/891	14/10468	0.337323	0.991216	0.991216	ITGB1/CLASP2	2
BP	GO:0072337	modified amino acid transport	2/891	14/10468	0.337323	0.991216	0.991216	SLC7A11/SLC22A5	2
BP	GO:0090231	regulation of spindle checkpoint	2/891	14/10468	0.337323	0.991216	0.991216	LCMT1/CDT1	2
BP	GO:0090266	regulation of mitotic cell cycle spindle assembly checkpoint	2/891	14/10468	0.337323	0.991216	0.991216	LCMT1/CDT1	2
BP	GO:0099632	protein transport within plasma membrane	2/891	14/10468	0.337323	0.991216	0.991216	STX3/AP3D1	2
BP	GO:0099637	neurotransmitter receptor transport	2/891	14/10468	0.337323	0.991216	0.991216	STX3/AP3D1	2
BP	GO:1900242	regulation of synaptic vesicle endocytosis	2/891	14/10468	0.337323	0.991216	0.991216	DNM1/TOR1A	2
BP	GO:1903020	positive regulation of glycoprotein metabolic process	2/891	14/10468	0.337323	0.991216	0.991216	PXYLP1/GOLGA2	2
BP	GO:1903055	positive regulation of extracellular matrix organization	2/891	14/10468	0.337323	0.991216	0.991216	CLASP2/IL6	2
BP	GO:1903204	negative regulation of oxidative stress-induced neuron death	2/891	14/10468	0.337323	0.991216	0.991216	ATF4/SLC7A11	2
BP	GO:1903504	regulation of mitotic spindle checkpoint	2/891	14/10468	0.337323	0.991216	0.991216	LCMT1/CDT1	2
BP	GO:2001267	regulation of cysteine-type endopeptidase activity involved in apoptotic signaling pathway	2/891	14/10468	0.337323	0.991216	0.991216	CASP8/JAK2	2
BP	GO:0048871	multicellular organismal homeostasis	25/891	267/10468	0.337775	0.991216	0.991216	GPR3/LEPR/PTGER3/GBA/PRCP/BBS10/B2M/NR1H2/EPAS1/IL18R1/PLCL1/TP53INP2/CEBPB/ATF4/PRKAR2A/TLR9/NPHP3/SLC22A5/SLC35D3/IL6/ACHE/DECR1/TMEM64/JAK2/LCN2	25
BP	GO:0051223	regulation of protein transport	39/891	426/10468	0.338712	0.991216	0.991216	EFCAB7/LEPROT/CD58/HAX1/MPC2/GLUL/TLR5/DNAJC1/MCU/TSG101/ZPR1/C2CD2L/OS9/MDM2/TGFB3/CDK5R1/MIDN/PDCD5/SAE1/FOXA2/EDEM1/TLR9/PDCD10/PARL/SLC7A11/ICE1/AGER/ADTRP/MAPK14/GOPC/SLC35D3/IL6/TOMM7/SRI/CYP51A1/ACHE/PCM1/UBR5/JAK2	39
BP	GO:0043506	regulation of JUN kinase activity	6/891	56/10468	0.341018	0.991216	0.991216	AIDA/MAP4K5/TLR9/AGER/MAP3K5/MAP3K4	6
BP	GO:0045132	meiotic chromosome segregation	6/891	56/10468	0.341018	0.991216	0.991216	ATM/ERCC4/DMC1/MEI1/SMC4/CENPC	6
BP	GO:0048002	antigen processing and presentation of peptide antigen	14/891	144/10468	0.341484	0.991216	0.991216	CAPZA1/PSMB4/PSMA1/SEC23A/B2M/PSMB3/PSMD3/AP2S1/PSMF1/SEC31A/SEC24B/SEC24D/DCTN6/PSMD5	14
BP	GO:0002526	acute inflammatory response	7/891	67/10468	0.343611	0.991216	0.991216	PTGER3/CFH/PRCP/PHB/CEBPB/OSMR/IL6	7
BP	GO:0070301	cellular response to hydrogen peroxide	7/891	67/10468	0.343611	0.991216	0.991216	MDM2/PCGF2/PDCD10/FOXO3/MAP3K5/IL6/LCN2	7
BP	GO:0090559	regulation of membrane permeability	7/891	67/10468	0.343611	0.991216	0.991216	STPG1/RHOT2/SPG7/CASP8/BAK1/TMEM14A/YWHAZ	7
BP	GO:1901216	positive regulation of neuron death	7/891	67/10468	0.343611	0.991216	0.991216	ATM/CDK5R1/CASP8/ATF4/FOXO3/MAP3K5/AIMP2	7
BP	GO:0010565	regulation of cellular ketone metabolic process	12/891	122/10468	0.343786	0.991216	0.991216	PSMB4/PSMA1/LONP2/PDPR/PSMB3/PSMD3/PDK2/NR1H2/ODC1/PSMF1/SLC7A11/PSMD5	12
BP	GO:0048705	skeletal system morphogenesis	12/891	122/10468	0.343786	0.991216	0.991216	DHRS3/ARID5B/TGFB3/CHSY1/PCGF2/HOXB5/AXIN2/TIPARP/IFT80/FGF18/MAPK14/BMP1	12
BP	GO:0010950	positive regulation of endopeptidase activity	11/891	111/10468	0.344636	0.991216	0.991216	BCL10/FADD/PDCD5/CASP10/CASP8/FOXL2/AGER/BAK1/MAP3K5/MYC/JAK2	11
BP	GO:0043433	negative regulation of DNA-binding transcription factor activity	11/891	111/10468	0.344636	0.991216	0.991216	XCL1/SETD6/ARRB2/ID2/FOXA2/BHLHE40/TLR9/SRI/PAXIP1/TRIB1/LRRC14	11
BP	GO:0042742	defense response to bacterium	8/891	78/10468	0.344898	0.991216	0.991216	TLR5/SEH1L/CEBPB/TLR9/LEAP2/IL6/RPL30/LCN2	8
BP	GO:0038095	Fc-epsilon receptor signaling pathway	10/891	100/10468	0.345189	0.991216	0.991216	BCL10/PSMB4/PSMA1/CALM1/PSMB3/PSMD3/PSMF1/GRAP2/CUL1/PSMD5	10
BP	GO:0002685	regulation of leukocyte migration	9/891	89/10468	0.345334	0.991216	0.991216	NBL1/XCL1/FADD/ADAM10/STK10/AGER/ADTRP/MAPK14/IL6	9
BP	GO:0006900	vesicle budding from membrane	9/891	89/10468	0.345334	0.991216	0.991216	TMED2/SEC23A/AP3D1/MCFD2/SEC31A/SEC24B/SEC24D/DNM1/GOLGA2	9
BP	GO:0007276	gamete generation	36/891	393/10468	0.345442	0.991216	0.991216	AZIN2/TESK2/DEDD/ITGB1/HERC4/MICALCL/ATM/GLI1/BTG1/BRCA2/TYRO3/ADAM10/IFT20/SPIRE1/ASF1B/KMT2B/CATSPERG/NRIP1/PICK1/DMC1/MEI1/CRTAP/FOXL2/BCL6/YTHDC2/GDF9/UBR2/PRDM1/FOXO3/USP42/HERPUD2/POMZP3/IMMP2L/TTC26/TDRD7/NR6A1	36
BP	GO:0051168	nuclear export	17/891	178/10468	0.3458	0.991216	0.991216	SRRM1/NUP160/AAAS/MDM2/SEH1L/ANKLE1/U2AF1/POLDIP3/RBM15B/LSG1/SDAD1/PHAX/HSPA9/ATXN1/HNRNPA2B1/NUP205/XPO7	17
BP	GO:0051402	neuron apoptotic process	16/891	167/10468	0.34762	0.991216	0.991216	FADD/ATM/ZPR1/TGFB3/TYRO3/ARRB2/CDK5R1/AKT1S1/CEBPB/ATF4/CPEB4/FOXO3/SOD2/HIPK2/JAK2/SET	16
BP	GO:0001960	negative regulation of cytokine-mediated signaling pathway	4/891	35/10468	0.347677	0.991216	0.991216	NR1H2/PARP14/IL6/CNOT7	4
BP	GO:0010171	body morphogenesis	4/891	35/10468	0.347677	0.991216	0.991216	ARID5B/TGFB3/CLASP2/TIPARP	4
BP	GO:0030888	regulation of B cell proliferation	4/891	35/10468	0.347677	0.991216	0.991216	ATM/ATAD5/TLR9/BCL6	4
BP	GO:0031057	negative regulation of histone modification	4/891	35/10468	0.347677	0.991216	0.991216	TAF7/JARID2/UBR5/SET	4
BP	GO:0043628	ncRNA 3'-end processing	4/891	35/10468	0.347677	0.991216	0.991216	INTS7/USB1/FBL/INTS12	4
BP	GO:0045844	positive regulation of striated muscle tissue development	4/891	35/10468	0.347677	0.991216	0.991216	GLI1/ARRB2/MAPK14/ZFPM2	4
BP	GO:0048636	positive regulation of muscle organ development	4/891	35/10468	0.347677	0.991216	0.991216	GLI1/ARRB2/MAPK14/ZFPM2	4
BP	GO:0051145	smooth muscle cell differentiation	4/891	35/10468	0.347677	0.991216	0.991216	OLFM2/HES1/MED28/SOD2	4
BP	GO:0060395	SMAD protein signal transduction	4/891	35/10468	0.347677	0.991216	0.991216	GDF11/TGFB3/GDF9/HIPK2	4
BP	GO:0061045	negative regulation of wound healing	4/891	35/10468	0.347677	0.991216	0.991216	THBD/CLASP2/AGER/ADTRP	4
BP	GO:0072350	tricarboxylic acid metabolic process	4/891	35/10468	0.347677	0.991216	0.991216	SDHB/SDHD/OGDH/ACO1	4
BP	GO:1901863	positive regulation of muscle tissue development	4/891	35/10468	0.347677	0.991216	0.991216	GLI1/ARRB2/MAPK14/ZFPM2	4
BP	GO:0098771	inorganic ion homeostasis	35/891	382/10468	0.347756	0.991216	0.991216	CD52/PTGER3/XCL1/XPR1/NCOA4/MCU/ISCU/FAM155A/CALM1/B2M/SLC24A1/NUBP1/PDK2/AFG3L2/AP3D1/EPAS1/CYBRD1/ATF4/CCR4/FBXL5/SLC9B1/DMXL1/ATP6V0E1/STC2/ATP6V1G2/BAK1/SRI/TRIM24/CUL1/TMEM64/MYC/JAK2/ACO1/LCN2/ATP7A	35
BP	GO:0030155	regulation of cell adhesion	34/891	371/10468	0.350108	0.991216	0.991216	PTPRU/BCL10/XCL1/PDE3B/LPXN/STX3/FADD/ATM/ADAM10/TPM1/PIEZO1/AP3D1/ACTN4/FOXA2/CEBPB/RUNX1/GRAP2/CLASP2/PLXNB1/PLXNA1/SERPINI1/BCL6/HES1/EGFLAM/AGER/ADTRP/MAPK14/CD164/CITED2/IL6/CDK6/JAK2/NINJ1/EFNB1	34
BP	GO:0003002	regionalization	18/891	190/10468	0.352372	0.991216	0.991216	NBL1/AIDA/ATM/GDF11/GLI1/TMED2/ALDH1A2/CHSY1/PCGF2/HOXB5/AXIN2/FOXA2/ETS2/BHLHE40/TRA2B/HES1/CITED2/HIPK2	18
BP	GO:0033013	tetrapyrrole metabolic process	5/891	46/10468	0.353673	0.991216	0.991216	UROD/AMN/RSAD1/SLC25A38/CPOX	5
BP	GO:0042509	regulation of tyrosine phosphorylation of STAT protein	5/891	46/10468	0.353673	0.991216	0.991216	PARP14/HES1/IL6/CNOT7/JAK2	5
BP	GO:0046427	positive regulation of JAK-STAT cascade	5/891	46/10468	0.353673	0.991216	0.991216	CRLF3/PARP14/HES1/IL6/JAK2	5
BP	GO:0050871	positive regulation of B cell activation	5/891	46/10468	0.353673	0.991216	0.991216	ATAD5/TLR9/BCL6/IL6/PAXIP1	5
BP	GO:0097345	mitochondrial outer membrane permeabilization	5/891	46/10468	0.353673	0.991216	0.991216	RHOT2/CASP8/BAK1/TMEM14A/YWHAZ	5
BP	GO:2000756	regulation of peptidyl-lysine acetylation	5/891	46/10468	0.353673	0.991216	0.991216	BRD7/KAT7/TAF7/PAXIP1/SET	5
BP	GO:0010817	regulation of hormone levels	24/891	258/10468	0.35427	0.991216	0.991216	DHRS3/UBE2Q1/HSD17B7/MPC2/GLUL/TACR2/MCU/CAMK2G/CYP17A1/CYP2R1/C2CD2L/HSD17B6/ALDH1A2/SULT1A1/MIDN/FOXA2/FOXL2/TIPARP/GDF9/STC2/IL6/SRI/ACHE/JAK2	24
BP	GO:1903708	positive regulation of hemopoiesis	12/891	123/10468	0.354286	0.991216	0.991216	HAX1/FADD/AP3D1/ID2/CASP8/RUNX1/BCL6/AGER/MAPK14/FOXO3/TMEM64/TRIB1	12
BP	GO:0006303	double-strand break repair via nonhomologous end joining	6/891	57/10468	0.356609	0.991216	0.991216	KAT5/ATM/ERCC4/XRCC5/PAXIP1/NBN	6
BP	GO:0002819	regulation of adaptive immune response	10/891	101/10468	0.356819	0.991216	0.991216	XCL1/FADD/B2M/ATAD5/IL18R1/BCL6/AGER/STX7/IL6/PAXIP1	10
BP	GO:0051193	regulation of cofactor metabolic process	9/891	90/10468	0.357676	0.991216	0.991216	NUP160/AAAS/PDPR/PDK2/SEH1L/SLC7A11/ME1/NUP205/SLC2A6	9
BP	GO:0007032	endosome organization	7/891	68/10468	0.357861	0.991216	0.991216	TSG101/VPS36/VPS18/AKTIP/CHMP6/VPS37A/DNM1	7
BP	GO:0019724	B cell mediated immunity	7/891	68/10468	0.357861	0.991216	0.991216	BCL10/XCL1/UNG/ATAD5/BCL6/PAXIP1/NBN	7
BP	GO:0032092	positive regulation of protein binding	7/891	68/10468	0.357861	0.991216	0.991216	STPG1/NVL/BAMBI/B2M/AKTIP/PLCL1/HIPK2	7
BP	GO:0070997	neuron death	22/891	236/10468	0.359124	0.991216	0.991216	GBA/FADD/ATM/ZPR1/TGFB3/TYRO3/ARRB2/CDK5R1/AKT1S1/CASP8/CEBPB/ATF4/SLC7A11/CPEB4/FOXO3/MAP3K5/SOD2/AIMP2/NAMPT/HIPK2/JAK2/SET	22
BP	GO:0007622	rhythmic behavior	3/891	25/10468	0.359316	0.991216	0.991216	ID2/AHCY/NCOA2	3
BP	GO:0032731	positive regulation of interleukin-1 beta production	3/891	25/10468	0.359316	0.991216	0.991216	CASP8/AGER/JAK2	3
BP	GO:0038179	neurotrophin signaling pathway	3/891	25/10468	0.359316	0.991216	0.991216	SORT1/AKT1S1/TMEM108	3
BP	GO:0042220	response to cocaine	3/891	25/10468	0.359316	0.991216	0.991216	SMPD1/FADD/MDM2	3
BP	GO:0045661	regulation of myoblast differentiation	3/891	25/10468	0.359316	0.991216	0.991216	BTG1/MAPK14/MAP3K5	3
BP	GO:0046636	negative regulation of alpha-beta T cell activation	3/891	25/10468	0.359316	0.991216	0.991216	XCL1/RUNX1/BCL6	3
BP	GO:0048512	circadian behavior	3/891	25/10468	0.359316	0.991216	0.991216	ID2/AHCY/NCOA2	3
BP	GO:0060416	response to growth hormone	3/891	25/10468	0.359316	0.991216	0.991216	LEPROT/SOCS2/JAK2	3
BP	GO:0071526	semaphorin-plexin signaling pathway	3/891	25/10468	0.359316	0.991216	0.991216	FARP2/PLXNB1/PLXNA1	3
BP	GO:0090169	regulation of spindle assembly	3/891	25/10468	0.359316	0.991216	0.991216	SMC3/SPAG5/STAG1	3
BP	GO:2000107	negative regulation of leukocyte apoptotic process	3/891	25/10468	0.359316	0.991216	0.991216	BCL10/FADD/BCL6	3
BP	GO:0010942	positive regulation of cell death	42/891	464/10468	0.359351	0.991216	0.991216	STPG1/SFPQ/ITGB3BP/BCL10/SORT1/ITGB1/SMPD1/RAD9A/FADD/ATM/BTG1/PNMA1/TGFB3/ALDH1A2/ADAM10/ARRB2/RPL26/CDK5R1/PHB/AXIN2/PDCD5/CASP10/CASP8/ATF4/RYBP/C3orf38/FOXL2/ZMAT3/BCL6/FNIP1/EEF1E1/E2F3/BAK1/FOXO3/MAP3K5/SOD2/AIMP2/IL6/STK17A/YWHAZ/MYC/JAK2	42
BP	GO:0033500	carbohydrate homeostasis	14/891	146/10468	0.360803	0.991216	0.991216	SESN2/LEPR/MPC2/HKDC1/MCU/PRCP/C2CD2L/PDK2/NME1/FOXA2/TRA2B/AGER/FOXO3/SRI	14
BP	GO:0042593	glucose homeostasis	14/891	146/10468	0.360803	0.991216	0.991216	SESN2/LEPR/MPC2/HKDC1/MCU/PRCP/C2CD2L/PDK2/NME1/FOXA2/TRA2B/AGER/FOXO3/SRI	14
BP	GO:0072001	renal system development	14/891	146/10468	0.360803	0.991216	0.991216	ARID5B/CDKN1C/NUP160/FADD/GDF11/MMP17/ALDH1A2/IFT20/ID2/ODC1/NPHP3/TIPARP/HES1/MYC	14
BP	GO:0051028	mRNA transport	13/891	135/10468	0.36285	0.991216	0.991216	SRRM1/AHCTF1/NUP160/AAAS/MVP/SEH1L/ZFP36/U2AF1/POLDIP3/RBM15B/HNRNPA2B1/NUP205/XPO7	13
BP	GO:0048732	gland development	23/891	248/10468	0.364131	0.991216	0.991216	ELF3/ARID5B/CDKN1C/CCND1/FADD/ATM/GLI1/SOCS2/BRCA2/GNPNAT1/TGFB3/ALDH1A2/APRT/NME1/ID2/CEBPB/PLXNA1/NPHP3/HES1/JARID2/CITED2/JAK2/ATP7A	23
BP	GO:0006469	negative regulation of protein kinase activity	16/891	169/10468	0.365647	0.991216	0.991216	GBA/AIDA/CDKN1C/SMPD1/TSG101/SPRED1/MVP/CHMP6/AKT1S1/TRIB2/ZGPAT/PRKAR2A/TAF7/PRKRIP1/TRIB1/RGS3	16
BP	GO:0050657	nucleic acid transport	16/891	169/10468	0.365647	0.991216	0.991216	SRRM1/SFPQ/AHCTF1/NUP160/AAAS/MVP/SEH1L/ZFP36/U2AF1/POLDIP3/RBM15B/SDAD1/PHAX/HNRNPA2B1/NUP205/XPO7	16
BP	GO:0050658	RNA transport	16/891	169/10468	0.365647	0.991216	0.991216	SRRM1/SFPQ/AHCTF1/NUP160/AAAS/MVP/SEH1L/ZFP36/U2AF1/POLDIP3/RBM15B/SDAD1/PHAX/HNRNPA2B1/NUP205/XPO7	16
BP	GO:1905114	cell surface receptor signaling pathway involved in cell-cell signaling	35/891	385/10468	0.365722	0.991216	0.991216	PTPRU/PSMB4/BAMBI/FAM53B/PSMA1/CCND1/BCL9L/PFDN5/GLI1/GPC6/CALM1/TYRO3/GPRC5B/BRD7/ARRB2/IFT20/PSMB3/PSMD3/AXIN2/TNRC6C/AP2S1/PSMF1/RUNX1/NPHP3/TMEM108/IFT80/CPZ/JADE1/CSNK1A1/MAPK14/FOXO3/CUL1/TMEM64/UBR5/PSMD5	35
BP	GO:0006749	glutathione metabolic process	4/891	36/10468	0.367648	0.991216	0.991216	CNDP2/GGT7/SLC7A11/MGST2	4
BP	GO:0032623	interleukin-2 production	4/891	36/10468	0.367648	0.991216	0.991216	XCL1/KAT5/ZFP36/RUNX1	4
BP	GO:0042771	intrinsic apoptotic signaling pathway in response to DNA damage by p53 class mediator	4/891	36/10468	0.367648	0.991216	0.991216	BRCA2/RPL26/ATAD5/HIPK2	4
BP	GO:0043001	Golgi to plasma membrane protein transport	4/891	36/10468	0.367648	0.991216	0.991216	AMN/GGA3/ARFRP1/GOPC	4
BP	GO:0055021	regulation of cardiac muscle tissue growth	4/891	36/10468	0.367648	0.991216	0.991216	GLI1/JARID2/MAPK14/ZFPM2	4
BP	GO:0071384	cellular response to corticosteroid stimulus	4/891	36/10468	0.367648	0.991216	0.991216	ZFP36/ZFP36L2/NR3C1/FOXO3	4
BP	GO:0032434	regulation of proteasomal ubiquitin-dependent protein catabolic process	10/891	102/10468	0.368502	0.991216	0.991216	GBA/MDM2/N4BP1/TLK2/TRIB2/RYBP/UBE2K/CSNK1A1/ANKIB1/TRIB1	10
BP	GO:0000028	ribosomal small subunit assembly	2/891	15/10468	0.369256	0.991216	0.991216	RPS27/MRPS7	2
BP	GO:0002566	somatic diversification of immune receptors via somatic mutation	2/891	15/10468	0.369256	0.991216	0.991216	UNG/PMS2	2
BP	GO:0003044	regulation of systemic arterial blood pressure mediated by a chemical signal	2/891	15/10468	0.369256	0.991216	0.991216	TPM1/SOD2	2
BP	GO:0003156	regulation of animal organ formation	2/891	15/10468	0.369256	0.991216	0.991216	HES1/CITED2	2
BP	GO:0006744	ubiquinone biosynthetic process	2/891	15/10468	0.369256	0.991216	0.991216	COQ2/COQ4	2
BP	GO:0006895	Golgi to endosome transport	2/891	15/10468	0.369256	0.991216	0.991216	SORT1/WIPI1	2
BP	GO:0007603	phototransduction, visible light	2/891	15/10468	0.369256	0.991216	0.991216	CALM1/FNTA	2
BP	GO:0009074	aromatic amino acid family catabolic process	2/891	15/10468	0.369256	0.991216	0.991216	PCBD1/FAH	2
BP	GO:0009309	amine biosynthetic process	2/891	15/10468	0.369256	0.991216	0.991216	AZIN2/ODC1	2
BP	GO:0010574	regulation of vascular endothelial growth factor production	2/891	15/10468	0.369256	0.991216	0.991216	ATF4/IL6	2
BP	GO:0016074	snoRNA metabolic process	2/891	15/10468	0.369256	0.991216	0.991216	FBL/GAR1	2
BP	GO:0016137	glycoside metabolic process	2/891	15/10468	0.369256	0.991216	0.991216	GBA/FUCA2	2
BP	GO:0021846	cell proliferation in forebrain	2/891	15/10468	0.369256	0.991216	0.991216	LHX5/PCM1	2
BP	GO:0031065	positive regulation of histone deacetylation	2/891	15/10468	0.369256	0.991216	0.991216	BCL6/C6orf89	2
BP	GO:0032516	positive regulation of phosphoprotein phosphatase activity	2/891	15/10468	0.369256	0.991216	0.991216	CALM1/JAK2	2
BP	GO:0042454	ribonucleoside catabolic process	2/891	15/10468	0.369256	0.991216	0.991216	HDDC3/AHCY	2
BP	GO:0042572	retinol metabolic process	2/891	15/10468	0.369256	0.991216	0.991216	DHRS3/ALDH1A2	2
BP	GO:0051385	response to mineralocorticoid	2/891	15/10468	0.369256	0.991216	0.991216	CCND1/FOXO3	2
BP	GO:0060142	regulation of syncytium formation by plasma membrane fusion	2/891	15/10468	0.369256	0.991216	0.991216	EHD2/MAPK14	2
BP	GO:0060914	heart formation	2/891	15/10468	0.369256	0.991216	0.991216	AXIN2/HES1	2
BP	GO:0061036	positive regulation of cartilage development	2/891	15/10468	0.369256	0.991216	0.991216	FGF18/BMP1	2
BP	GO:0071157	negative regulation of cell cycle arrest	2/891	15/10468	0.369256	0.991216	0.991216	CCND1/MDM2	2
BP	GO:0071295	cellular response to vitamin	2/891	15/10468	0.369256	0.991216	0.991216	MDM2/TRIM24	2
BP	GO:0071425	hematopoietic stem cell proliferation	2/891	15/10468	0.369256	0.991216	0.991216	RUNX1/MECOM	2
BP	GO:0099116	tRNA 5'-end processing	2/891	15/10468	0.369256	0.991216	0.991216	RPP14/RPP21	2
BP	GO:1901663	quinone biosynthetic process	2/891	15/10468	0.369256	0.991216	0.991216	COQ2/COQ4	2
BP	GO:1902188	positive regulation of viral release from host cell	2/891	15/10468	0.369256	0.991216	0.991216	SMC3/TSG101	2
BP	GO:1902254	negative regulation of intrinsic apoptotic signaling pathway by p53 class mediator	2/891	15/10468	0.369256	0.991216	0.991216	MDM2/ATAD5	2
BP	GO:1902473	regulation of protein localization to synapse	2/891	15/10468	0.369256	0.991216	0.991216	GPC6/ADAM10	2
BP	GO:1904380	endoplasmic reticulum mannose trimming	2/891	15/10468	0.369256	0.991216	0.991216	OS9/EDEM1	2
BP	GO:0016241	regulation of macroautophagy	14/891	147/10468	0.370531	0.991216	0.991216	SESN2/RRAGC/GBA/QSOX1/PIP4K2A/NEDD4/IFT20/CDK5R1/SUPT5H/NPRL2/ATP6V0E1/ATP6V1G2/EPM2A/TOMM7	14
BP	GO:0018958	phenol-containing compound metabolic process	5/891	47/10468	0.371093	0.991216	0.991216	FAH/SULT1A1/EPAS1/SLC7A11/ATP7A	5
BP	GO:0019915	lipid storage	5/891	47/10468	0.371093	0.991216	0.991216	NR1H2/NRIP1/GM2A/IL6/SQLE	5
BP	GO:0031100	animal organ regeneration	5/891	47/10468	0.371093	0.991216	0.991216	PTPRU/CCND1/GLI1/CEBPB/BAK1	5
BP	GO:0043507	positive regulation of JUN kinase activity	5/891	47/10468	0.371093	0.991216	0.991216	MAP4K5/TLR9/AGER/MAP3K5/MAP3K4	5
BP	GO:0055024	regulation of cardiac muscle tissue development	5/891	47/10468	0.371093	0.991216	0.991216	GLI1/ARRB2/JARID2/MAPK14/ZFPM2	5
BP	GO:1904894	positive regulation of STAT cascade	5/891	47/10468	0.371093	0.991216	0.991216	CRLF3/PARP14/HES1/IL6/JAK2	5
BP	GO:2000106	regulation of leukocyte apoptotic process	5/891	47/10468	0.371093	0.991216	0.991216	BCL10/FADD/BCL6/SLC7A11/FNIP1	5
BP	GO:0007601	visual perception	8/891	80/10468	0.371345	0.991216	0.991216	DHRS3/EYA3/BBS10/SLC24A1/OLFM2/EML2/EPAS1/BBS9	8
BP	GO:0010906	regulation of glucose metabolic process	8/891	80/10468	0.371345	0.991216	0.991216	SESN2/LEPR/LCMT1/PDK2/MIDN/FOXA2/PPP1R3B/NCOA2	8
BP	GO:0033135	regulation of peptidyl-serine phosphorylation	8/891	80/10468	0.371345	0.991216	0.991216	HAX1/ARRB2/SPTBN4/PLCL1/PDCD10/FNIP1/BAK1/IL6	8
BP	GO:0006979	response to oxidative stress	28/891	306/10468	0.371891	0.991216	0.991216	SESN2/SFPQ/ADPRHL2/MDM2/BTG1/FUT8/TPM1/PCGF2/PDK2/PNKP/EPAS1/GGT7/ATF4/PDCD10/CPEB2/SLC7A11/STC2/BAK1/FOXO3/MAP3K5/SOD2/NUDT1/IL6/VKORC1L1/JAK2/LCN2/TOR1A/ATP7A	28
BP	GO:0030433	ubiquitin-dependent ERAD pathway	7/891	69/10468	0.372161	0.991216	0.991216	FBXO2/FBXO44/EDEM3/OS9/JKAMP/HSPA13/EDEM1	7
BP	GO:1905897	regulation of response to endoplasmic reticulum stress	7/891	69/10468	0.372161	0.991216	0.991216	OS9/FICD/USP25/EDEM1/MANF/BAK1/COPS5	7
BP	GO:0046390	ribose phosphate biosynthetic process	20/891	215/10468	0.372196	0.991216	0.991216	MPC2/HKDC1/NUP160/AAAS/ADPGK/PDPR/APRT/PDK2/NME1/SEH1L/ACSS2/UCKL1/SLC25A1/ADSL/SLC26A1/ACSL6/SLC35B3/OGDH/NUP205/SLC2A6	20
BP	GO:0002062	chondrocyte differentiation	6/891	58/10468	0.372246	0.991216	0.991216	PTHLH/CHSY1/AXIN2/IFT80/FGF18/MAPK14	6
BP	GO:0009791	post-embryonic development	6/891	58/10468	0.372246	0.991216	0.991216	ARID5B/ATM/TIPARP/BAK1/PRDM1/ACO1	6
BP	GO:0036498	IRE1-mediated unfolded protein response	6/891	58/10468	0.372246	0.991216	0.991216	FICD/WIPI1/EDEM1/SEC31A/BAK1/COPS5	6
BP	GO:0010952	positive regulation of peptidase activity	12/891	125/10468	0.375432	0.991216	0.991216	BCL10/FADD/PDCD5/CASP10/CASP8/FOXL2/AGER/BAK1/MAPK14/MAP3K5/MYC/JAK2	12
BP	GO:0070201	regulation of establishment of protein localization	42/891	467/10468	0.375859	0.991216	0.991216	EFCAB7/LEPROT/CD58/HAX1/MPC2/GLUL/TLR5/DNAJC1/MCU/TSG101/ZPR1/C2CD2L/OS9/MDM2/TGFB3/CDK5R1/MIDN/PDCD5/SAE1/CASP8/FOXA2/CCT8/EDEM1/TLR9/PDCD10/PARL/SLC7A11/ICE1/AGER/ADTRP/MAPK14/GOPC/SLC35D3/IL6/TOMM7/SRI/CYP51A1/ACHE/PCM1/YWHAZ/UBR5/JAK2	42
BP	GO:0050870	positive regulation of T cell activation	11/891	114/10468	0.377854	0.991216	0.991216	BCL10/XCL1/FADD/AP3D1/RUNX1/GRAP2/BCL6/HES1/AGER/IL6/EFNB1	11
BP	GO:0071347	cellular response to interleukin-1	11/891	114/10468	0.377854	0.991216	0.991216	PSMB4/XCL1/PSMA1/PSMB3/PSMD3/PSMF1/CEBPB/IL6/CUL1/PSMD5/LCN2	11
BP	GO:0006914	autophagy	37/891	410/10468	0.378182	0.991216	0.991216	SESN2/RRAGC/LEPR/HAX1/GBA/QSOX1/PIP4K2A/TSG101/ATG2A/KAT5/ATM/MAP1LC3B2/VPS36/VPS18/NEDD4/ERCC4/MAP1LC3B/IFT20/CDK5R1/TLK2/WIPI1/CHMP6/EPG5/SUPT5H/ATG16L1/TP53INP2/NPRL2/WDFY3/ATG12/ATP6V0E1/ATP6V1G2/FOXO3/EPM2A/TOMM7/NAMPT/VPS37A/GOLGA2	37
BP	GO:0061919	process utilizing autophagic mechanism	37/891	410/10468	0.378182	0.991216	0.991216	SESN2/RRAGC/LEPR/HAX1/GBA/QSOX1/PIP4K2A/TSG101/ATG2A/KAT5/ATM/MAP1LC3B2/VPS36/VPS18/NEDD4/ERCC4/MAP1LC3B/IFT20/CDK5R1/TLK2/WIPI1/CHMP6/EPG5/SUPT5H/ATG16L1/TP53INP2/NPRL2/WDFY3/ATG12/ATP6V0E1/ATP6V1G2/FOXO3/EPM2A/TOMM7/NAMPT/VPS37A/GOLGA2	37
BP	GO:0050920	regulation of chemotaxis	10/891	103/10468	0.380226	0.991216	0.991216	NBL1/ARTN/XCL1/STX3/ADAM10/CCR4/FGF18/AGER/MAPK14/IL6	10
BP	GO:0072329	monocarboxylic acid catabolic process	10/891	103/10468	0.380226	0.991216	0.991216	SESN2/FAH/LONP2/XYLB/IDUA/AMACR/ADTRP/DECR1/IDNK/SLC27A4	10
BP	GO:0043281	regulation of cysteine-type endopeptidase activity involved in apoptotic process	14/891	148/10468	0.380296	0.991216	0.991216	IFI6/BCL10/FADD/MDM2/ARRB2/PDCD5/CASP10/CASP8/FOXL2/FNIP1/BAK1/MAP3K5/MYC/JAK2	14
BP	GO:0019318	hexose metabolic process	17/891	182/10468	0.380812	0.991216	0.991216	SESN2/LEPR/HKDC1/FUT8/ADPGK/MAN2C1/LCMT1/PDK2/MIDN/FOXA2/SLC25A1/ATF4/NISCH/MAPK14/FUCA2/PPP1R3B/NCOA2	17
BP	GO:0048489	synaptic vesicle transport	9/891	92/10468	0.382507	0.991216	0.991216	STX3/RAP1B/VPS18/AP3D1/PIP5K1C/AP3S1/AP3M2/DNM1/TOR1A	9
BP	GO:0097480	establishment of synaptic vesicle localization	9/891	92/10468	0.382507	0.991216	0.991216	STX3/RAP1B/VPS18/AP3D1/PIP5K1C/AP3S1/AP3M2/DNM1/TOR1A	9
BP	GO:0006873	cellular ion homeostasis	31/891	342/10468	0.383106	0.991216	0.991216	CD52/PTGER3/XCL1/XPR1/NCOA4/MCU/ISCU/FAM155A/CALM1/SLC24A1/NUBP1/AFG3L2/AP3D1/CYBRD1/ATF4/CCR4/FBXL5/SLC9B1/DMXL1/ATP6V0E1/STC2/ATP6V1G2/BAK1/SRI/CUL1/TMEM64/MYC/JAK2/ACO1/LCN2/ATP7A	31
BP	GO:0002704	negative regulation of leukocyte mediated immunity	3/891	26/10468	0.383256	0.991216	0.991216	XCL1/ARRB2/BCL6	3
BP	GO:0006515	protein quality control for misfolded or incompletely synthesized proteins	3/891	26/10468	0.383256	0.991216	0.991216	LONP2/SDF2L1/TOR1A	3
BP	GO:0006584	catecholamine metabolic process	3/891	26/10468	0.383256	0.991216	0.991216	SULT1A1/EPAS1/ATP7A	3
BP	GO:0009712	catechol-containing compound metabolic process	3/891	26/10468	0.383256	0.991216	0.991216	SULT1A1/EPAS1/ATP7A	3
BP	GO:0010677	negative regulation of cellular carbohydrate metabolic process	3/891	26/10468	0.383256	0.991216	0.991216	LEPR/MIDN/FOXA2	3
BP	GO:0010862	positive regulation of pathway-restricted SMAD protein phosphorylation	3/891	26/10468	0.383256	0.991216	0.991216	GDF11/TGFB3/GDF9	3
BP	GO:0030514	negative regulation of BMP signaling pathway	3/891	26/10468	0.383256	0.991216	0.991216	NBL1/DAND5/HIPK2	3
BP	GO:0032467	positive regulation of cytokinesis	3/891	26/10468	0.383256	0.991216	0.991216	CDC14A/CDC6/CSPP1	3
BP	GO:0042168	heme metabolic process	3/891	26/10468	0.383256	0.991216	0.991216	UROD/SLC25A38/CPOX	3
BP	GO:0045214	sarcomere organization	3/891	26/10468	0.383256	0.991216	0.991216	ITGB1/SYNPO2L/TPM1	3
BP	GO:0060113	inner ear receptor cell differentiation	3/891	26/10468	0.383256	0.991216	0.991216	IFT20/HES1/SEC24B	3
BP	GO:0060563	neuroepithelial cell differentiation	3/891	26/10468	0.383256	0.991216	0.991216	CEBPB/HES1/SEC24B	3
BP	GO:0060711	labyrinthine layer development	3/891	26/10468	0.383256	0.991216	0.991216	TMED2/CASP8/HES1	3
BP	GO:0061157	mRNA destabilization	3/891	26/10468	0.383256	0.991216	0.991216	CPEB3/ZFP36/ZFP36L2	3
BP	GO:0070231	T cell apoptotic process	3/891	26/10468	0.383256	0.991216	0.991216	BCL10/FADD/BAK1	3
BP	GO:0070911	global genome nucleotide-excision repair	3/891	26/10468	0.383256	0.991216	0.991216	GTF2H1/RNF111/ERCC4	3
BP	GO:1903053	regulation of extracellular matrix organization	3/891	26/10468	0.383256	0.991216	0.991216	CLASP2/ADTRP/IL6	3
BP	GO:1903170	negative regulation of calcium ion transmembrane transport	3/891	26/10468	0.383256	0.991216	0.991216	CALM1/TLR9/SRI	3
BP	GO:0015931	nucleobase-containing compound transport	19/891	205/10468	0.383316	0.991216	0.991216	SRRM1/SFPQ/AHCTF1/SLC29A3/NUP160/AAAS/MVP/SEH1L/EPG5/ZFP36/U2AF1/POLDIP3/RBM15B/SDAD1/PHAX/SLC35B3/HNRNPA2B1/NUP205/XPO7	19
BP	GO:0043065	positive regulation of apoptotic process	39/891	434/10468	0.384189	0.991216	0.991216	STPG1/SFPQ/ITGB3BP/BCL10/SORT1/ITGB1/SMPD1/RAD9A/FADD/ATM/BTG1/PNMA1/TGFB3/ALDH1A2/ADAM10/ARRB2/RPL26/CDK5R1/PDCD5/CASP10/CASP8/ATF4/RYBP/C3orf38/FOXL2/ZMAT3/BCL6/FNIP1/EEF1E1/E2F3/BAK1/FOXO3/MAP3K5/SOD2/IL6/STK17A/YWHAZ/MYC/JAK2	39
BP	GO:0007259	JAK-STAT cascade	8/891	81/10468	0.384631	0.991216	0.991216	LEPROT/SOCS2/CRLF3/PARP14/HES1/IL6/CNOT7/JAK2	8
BP	GO:0043271	negative regulation of ion transport	8/891	81/10468	0.384631	0.991216	0.991216	ISCU/CALM1/NEDD4/ATF4/TLR9/GOPC/SRI/ATP7A	8
BP	GO:0050953	sensory perception of light stimulus	8/891	81/10468	0.384631	0.991216	0.991216	DHRS3/EYA3/BBS10/SLC24A1/OLFM2/EML2/EPAS1/BBS9	8
BP	GO:0051304	chromosome separation	8/891	81/10468	0.384631	0.991216	0.991216	ATM/ERCC4/LCMT1/CDT1/CDC6/ANAPC1/ANAPC4/CDC26	8
BP	GO:0000075	cell cycle checkpoint	18/891	194/10468	0.386436	0.991216	0.991216	DTL/INTS7/RAD9A/CCND1/ATM/MDM2/RAD9B/ZWILCH/LCMT1/RBL2/CDT1/RPL26/CDC6/CDC45/MAPK14/CNOT4/CNOT7/NBN	18
BP	GO:0035335	peptidyl-tyrosine dephosphorylation	7/891	70/10468	0.386492	0.991216	0.991216	EYA3/PTPRU/PTPRF/CDC14A/SSH2/MTMR4/PTPN4	7
BP	GO:0044264	cellular polysaccharide metabolic process	7/891	70/10468	0.386492	0.991216	0.991216	LEPR/CSGALNACT2/EXT2/CALM1/PHKB/B3GNT2/PPP1R3B	7
BP	GO:0048609	multicellular organismal reproductive process	42/891	469/10468	0.386954	0.991216	0.991216	AZIN2/TESK2/UBE2Q1/DEDD/ITGB1/HERC4/HMX3/MICALCL/ATM/GLI1/BTG1/TMED2/BRCA2/TGFB3/TYRO3/ADAM10/ARRB2/IFT20/SPIRE1/ASF1B/KMT2B/CATSPERG/NRIP1/PICK1/DMC1/MEI1/CRTAP/FOXL2/BCL6/YTHDC2/GDF9/STC2/UBR2/PRDM1/FOXO3/USP42/HERPUD2/POMZP3/IMMP2L/TTC26/TDRD7/NR6A1	42
BP	GO:0042531	positive regulation of tyrosine phosphorylation of STAT protein	4/891	37/10468	0.387582	0.991216	0.991216	PARP14/HES1/IL6/JAK2	4
BP	GO:2001023	regulation of response to drug	4/891	37/10468	0.387582	0.991216	0.991216	TACR2/GDF9/FOXO3/TOR1A	4
BP	GO:0019933	cAMP-mediated signaling	6/891	59/10468	0.387904	0.991216	0.991216	GPR3/PTGER3/EIF4EBP2/PDE3B/PTHLH/CALM1	6
BP	GO:0021761	limbic system development	6/891	59/10468	0.387904	0.991216	0.991216	LHX5/CDK5R1/NME1/TMEM108/UQCRQ/CDK6	6
BP	GO:0031397	negative regulation of protein ubiquitination	6/891	59/10468	0.387904	0.991216	0.991216	IVNS1ABP/PRMT3/N4BP1/ARRB2/PINX1/UBR5	6
BP	GO:0043462	regulation of ATPase activity	6/891	59/10468	0.387904	0.991216	0.991216	TOR1AIP2/DNAJC1/TPM1/TLR9/TNNC1/TMEM64	6
BP	GO:0046128	purine ribonucleoside metabolic process	6/891	59/10468	0.387904	0.991216	0.991216	MAGI3/GPHN/HDDC3/APRT/NME1/AHCY	6
BP	GO:0046634	regulation of alpha-beta T cell activation	6/891	59/10468	0.387904	0.991216	0.991216	XCL1/AP3D1/RUNX1/BCL6/AGER/PRDM1	6
BP	GO:1904659	glucose transmembrane transport	6/891	59/10468	0.387904	0.991216	0.991216	SESN2/SORT1/MEF2A/SLC5A3/MAPK14/SLC2A6	6
BP	GO:0018209	peptidyl-serine modification	20/891	217/10468	0.38839	0.991216	0.991216	CDC7/HAX1/ATM/ARRB2/CDK5R1/TLK2/MGAT5B/SPTBN4/TLK1/PLCL1/MAPKAPK3/PDCD10/EGFLAM/FNIP1/CSNK1A1/BAK1/MAPK14/IL6/HIPK2/PKN3	20
BP	GO:0050804	modulation of chemical synaptic transmission	20/891	217/10468	0.38839	0.991216	0.991216	GLUL/ITGB1/TACR2/EIF4EBP2/CPEB3/STX3/RAP1B/VPS18/SLC24A1/ARRB2/PLCL1/PICK1/NISCH/TMEM108/SLC7A11/AGER/ACHE/JAK2/DNM1/TOR1A	20
BP	GO:0099177	regulation of trans-synaptic signaling	20/891	217/10468	0.38839	0.991216	0.991216	GLUL/ITGB1/TACR2/EIF4EBP2/CPEB3/STX3/RAP1B/VPS18/SLC24A1/ARRB2/PLCL1/PICK1/NISCH/TMEM108/SLC7A11/AGER/ACHE/JAK2/DNM1/TOR1A	20
BP	GO:0002312	B cell activation involved in immune response	5/891	48/10468	0.388514	0.991216	0.991216	UNG/ATAD5/BCL6/PAXIP1/NBN	5
BP	GO:0007260	tyrosine phosphorylation of STAT protein	5/891	48/10468	0.388514	0.991216	0.991216	PARP14/HES1/IL6/CNOT7/JAK2	5
BP	GO:0015696	ammonium transport	5/891	48/10468	0.388514	0.991216	0.991216	AZIN2/TACR2/SLC22A5/TAF7/TOR1A	5
BP	GO:0030521	androgen receptor signaling pathway	5/891	48/10468	0.388514	0.991216	0.991216	NCOA4/KAT5/ARRB2/PHB/NRIP1	5
BP	GO:0042440	pigment metabolic process	5/891	48/10468	0.388514	0.991216	0.991216	UROD/APRT/SLC25A38/CPOX/SLC7A11	5
BP	GO:0043367	CD4-positive, alpha-beta T cell differentiation	5/891	48/10468	0.388514	0.991216	0.991216	IL18R1/RUNX1/BCL6/IL6/ATP7A	5
BP	GO:0060419	heart growth	5/891	48/10468	0.388514	0.991216	0.991216	ARID2/GLI1/JARID2/MAPK14/ZFPM2	5
BP	GO:0070059	intrinsic apoptotic signaling pathway in response to endoplasmic reticulum stress	5/891	48/10468	0.388514	0.991216	0.991216	CEBPB/ATF4/UBE2K/BAK1/MAP3K5	5
BP	GO:0000184	nuclear-transcribed mRNA catabolic process, nonsense-mediated decay	11/891	115/10468	0.389006	0.991216	0.991216	RPS27/RPL27A/RPL41/RPL4/RPL26/RPL13A/RPS11/RPL3/RPL30/SECISBP2/RPL35	11
BP	GO:0070663	regulation of leukocyte proliferation	11/891	115/10468	0.389006	0.991216	0.991216	XCL1/FADD/ATM/ATAD5/CEBPB/TLR9/BCL6/HES1/AGER/IL6/EFNB1	11
BP	GO:0007389	pattern specification process	22/891	240/10468	0.389855	0.991216	0.991216	NBL1/AIDA/ATM/GDF11/GLI1/TMED2/ALDH1A2/RNF111/CHSY1/PCGF2/HOXB5/AXIN2/DAND5/FOXA2/ETS2/BHLHE40/NPHP3/TRA2B/HES1/CITED2/HIPK2/EFNB1	22
BP	GO:0009611	response to wounding	35/891	389/10468	0.389985	0.991216	0.991216	PTPRF/CAPZA1/LRIG2/JMJD1C/HPS5/PRCP/GLI1/AJUBA/TGFB3/TYRO3/TPM1/ARRB2/MYL12A/ZFP36/EHD2/ZFP36L2/GGCX/FOXA2/THBD/CLASP2/PRKAR2A/PDCD10/SLC7A11/AGER/ADTRP/C6orf89/MAP3K5/IL6/ACHE/YWHAZ/ZFPM2/JAK2/NINJ1/TOR1A/ATP7A	35
BP	GO:0007162	negative regulation of cell adhesion	14/891	149/10468	0.390091	0.991216	0.991216	XCL1/PDE3B/LPXN/ADAM10/ACTN4/CEBPB/RUNX1/CLASP2/PLXNB1/PLXNA1/BCL6/ADTRP/CD164/JAK2	14
BP	GO:0030900	forebrain development	19/891	206/10468	0.391657	0.991216	0.991216	GLI1/LHX5/TYRO3/B2M/ALDH1A2/CDK5R1/NME1/ID2/C21orf91/TMEM108/TRA2B/HES1/SLC7A11/UQCRQ/EFHC1/CDK6/PCM1/SECISBP2/ATP7A	19
BP	GO:0007507	heart development	30/891	332/10468	0.392698	0.991216	0.991216	DHRS3/ITGB1/SYNPO2L/ATM/ARID2/GLI1/MDM2/TMED2/SPRED1/ALDH1A2/TPM1/MEF2A/ARRB2/IFT20/AXIN2/DAND5/ID2/LTBP1/TNNC1/NPHP3/HES1/SEC24B/JARID2/MAPK14/PRICKLE4/PRDM1/CITED2/SRI/ZFPM2/TMEM65	30
BP	GO:1901652	response to peptide	30/891	332/10468	0.392698	0.991216	0.991216	SESN2/LEPROT/SORT1/RAB13/EIF4EBP2/PDE3B/SIK2/RAP1B/MDM2/BTG1/SOCS2/APRT/CDC6/KAT7/PDK2/PRKAR2A/CPEB2/KLF3/AP3S1/ATP6V0E1/STC2/ATP6V1G2/AGER/MAPK14/PHIP/FOXO3/NAMPT/JAK2/GKAP1/DNM1	30
BP	GO:0055080	cation homeostasis	34/891	378/10468	0.393029	0.991216	0.991216	CD52/PTGER3/XCL1/NCOA4/MCU/ISCU/FAM155A/CALM1/B2M/SLC24A1/NUBP1/PDK2/AFG3L2/AP3D1/EPAS1/CYBRD1/ATF4/CCR4/FBXL5/SLC9B1/DMXL1/ATP6V0E1/STC2/ATP6V1G2/BAK1/SRI/TRIM24/CUL1/TMEM64/MYC/JAK2/ACO1/LCN2/ATP7A	34
BP	GO:1901215	negative regulation of neuron death	13/891	138/10468	0.393357	0.991216	0.991216	GBA/ZPR1/TGFB3/TYRO3/ARRB2/CEBPB/ATF4/SLC7A11/CPEB4/SOD2/HIPK2/JAK2/SET	13
BP	GO:0051099	positive regulation of binding	12/891	127/10468	0.396718	0.991216	0.991216	STPG1/NVL/BAMBI/B2M/AKTIP/CDT1/NME1/PLCL1/HES1/HIPK2/PINX1/JAK2	12
BP	GO:0008630	intrinsic apoptotic signaling pathway in response to DNA damage	8/891	82/10468	0.397938	0.991216	0.991216	RAD9A/DDIAS/ATM/BRCA2/RPL26/ATAD5/BAK1/HIPK2	8
BP	GO:0010638	positive regulation of organelle organization	42/891	471/10468	0.398111	0.991216	0.991216	SFPQ/LEPROT/HAX1/GBA/NEK2/PIP4K2A/SYNPO2L/ATM/SART3/ARPC3/TGFB3/NUSAP1/TPM1/CCP110/BRD7/CDT1/SPAG5/CDK5R1/KAT7/SPIRE1/PDCD5/SAE1/PNKP/CASP8/XRCC5/CCT8/RANBP1/PICK1/ZMYND10/BCL6/ANAPC4/JARID2/BAK1/C6orf89/PHIP/MAP3K4/TOMM7/HNRNPA2B1/PAXIP1/NBN/YWHAZ/PHF19	42
BP	GO:0032504	multicellular organism reproduction	42/891	471/10468	0.398111	0.991216	0.991216	AZIN2/TESK2/UBE2Q1/DEDD/ITGB1/HERC4/HMX3/MICALCL/ATM/GLI1/BTG1/TMED2/BRCA2/TGFB3/TYRO3/ADAM10/ARRB2/IFT20/SPIRE1/ASF1B/KMT2B/CATSPERG/NRIP1/PICK1/DMC1/MEI1/CRTAP/FOXL2/BCL6/YTHDC2/GDF9/STC2/UBR2/PRDM1/FOXO3/USP42/HERPUD2/POMZP3/IMMP2L/TTC26/TDRD7/NR6A1	42
BP	GO:0007093	mitotic cell cycle checkpoint	14/891	150/10468	0.399911	0.991216	0.991216	RAD9A/CCND1/ATM/MDM2/RAD9B/ZWILCH/LCMT1/RBL2/CDT1/RPL26/CDC6/CNOT4/CNOT7/NBN	14
BP	GO:0010821	regulation of mitochondrion organization	14/891	150/10468	0.399911	0.991216	0.991216	LEPROT/HAX1/GBA/RHOT2/ARRB2/PDCD5/SAE1/CASP8/PARL/FNIP1/BAK1/TMEM14A/TOMM7/YWHAZ	14
BP	GO:0033209	tumor necrosis factor-mediated signaling pathway	11/891	116/10468	0.400182	0.991216	0.991216	PSMB4/PSMA1/PSMB3/PSMD3/ACTN4/CASP8/PSMF1/LTB/FOXO3/JAK2/PSMD5	11
BP	GO:0002825	regulation of T-helper 1 type immune response	2/891	16/10468	0.400561	0.991216	0.991216	XCL1/IL18R1	2
BP	GO:0003382	epithelial cell morphogenesis	2/891	16/10468	0.400561	0.991216	0.991216	SIPA1L3/FAT1	2
BP	GO:0006534	cysteine metabolic process	2/891	16/10468	0.400561	0.991216	0.991216	AHCY/SLC7A11	2
BP	GO:0006743	ubiquinone metabolic process	2/891	16/10468	0.400561	0.991216	0.991216	COQ2/COQ4	2
BP	GO:0007221	positive regulation of transcription of Notch receptor target	2/891	16/10468	0.400561	0.991216	0.991216	MAML2/MAML3	2
BP	GO:0009148	pyrimidine nucleoside triphosphate biosynthetic process	2/891	16/10468	0.400561	0.991216	0.991216	NME1/UCKL1	2
BP	GO:0010573	vascular endothelial growth factor production	2/891	16/10468	0.400561	0.991216	0.991216	ATF4/IL6	2
BP	GO:0010640	regulation of platelet-derived growth factor receptor signaling pathway	2/891	16/10468	0.400561	0.991216	0.991216	LRIG2/IFT20	2
BP	GO:0010644	cell communication by electrical coupling	2/891	16/10468	0.400561	0.991216	0.991216	CALM1/SRI	2
BP	GO:0010831	positive regulation of myotube differentiation	2/891	16/10468	0.400561	0.991216	0.991216	EHD2/MAPK14	2
BP	GO:0014808	release of sequestered calcium ion into cytosol by sarcoplasmic reticulum	2/891	16/10468	0.400561	0.991216	0.991216	CALM1/SRI	2
BP	GO:0019430	removal of superoxide radicals	2/891	16/10468	0.400561	0.991216	0.991216	SOD2/ATP7A	2
BP	GO:0032897	negative regulation of viral transcription	2/891	16/10468	0.400561	0.991216	0.991216	ZFP36/ZNF639	2
BP	GO:0033280	response to vitamin D	2/891	16/10468	0.400561	0.991216	0.991216	STC2/TRIM24	2
BP	GO:0035268	protein mannosylation	2/891	16/10468	0.400561	0.991216	0.991216	SDF2L1/DPY19L1	2
BP	GO:0036474	cell death in response to hydrogen peroxide	2/891	16/10468	0.400561	0.991216	0.991216	PDCD10/FOXO3	2
BP	GO:0042491	inner ear auditory receptor cell differentiation	2/891	16/10468	0.400561	0.991216	0.991216	HES1/SEC24B	2
BP	GO:0042533	tumor necrosis factor biosynthetic process	2/891	16/10468	0.400561	0.991216	0.991216	AGER/JAK2	2
BP	GO:0042534	regulation of tumor necrosis factor biosynthetic process	2/891	16/10468	0.400561	0.991216	0.991216	AGER/JAK2	2
BP	GO:0043371	negative regulation of CD4-positive, alpha-beta T cell differentiation	2/891	16/10468	0.400561	0.991216	0.991216	RUNX1/BCL6	2
BP	GO:0043981	histone H4-K5 acetylation	2/891	16/10468	0.400561	0.991216	0.991216	KAT7/JADE1	2
BP	GO:0043982	histone H4-K8 acetylation	2/891	16/10468	0.400561	0.991216	0.991216	KAT7/JADE1	2
BP	GO:0045324	late endosome to vacuole transport	2/891	16/10468	0.400561	0.991216	0.991216	LEPROT/VPS36	2
BP	GO:0045830	positive regulation of isotype switching	2/891	16/10468	0.400561	0.991216	0.991216	ATAD5/PAXIP1	2
BP	GO:0046475	glycerophospholipid catabolic process	2/891	16/10468	0.400561	0.991216	0.991216	GDE1/GDPD1	2
BP	GO:0046514	ceramide catabolic process	2/891	16/10468	0.400561	0.991216	0.991216	GBA/GM2A	2
BP	GO:0048048	embryonic eye morphogenesis	2/891	16/10468	0.400561	0.991216	0.991216	FOXL2/HIPK2	2
BP	GO:0050855	regulation of B cell receptor signaling pathway	2/891	16/10468	0.400561	0.991216	0.991216	LPXN/RUNX1	2
BP	GO:0070102	interleukin-6-mediated signaling pathway	2/891	16/10468	0.400561	0.991216	0.991216	IL6/JAK2	2
BP	GO:0070200	establishment of protein localization to telomere	2/891	16/10468	0.400561	0.991216	0.991216	BRCA2/CCT8	2
BP	GO:0097106	postsynaptic density organization	2/891	16/10468	0.400561	0.991216	0.991216	TMEM108/DLG3	2
BP	GO:0097734	extracellular exosome biogenesis	2/891	16/10468	0.400561	0.991216	0.991216	TSG101/COPS5	2
BP	GO:1900363	regulation of mRNA polyadenylation	2/891	16/10468	0.400561	0.991216	0.991216	CPEB3/SUPT5H	2
BP	GO:1901522	positive regulation of transcription from RNA polymerase II promoter involved in cellular response to chemical stimulus	2/891	16/10468	0.400561	0.991216	0.991216	SESN2/ATF4	2
BP	GO:1903514	release of sequestered calcium ion into cytosol by endoplasmic reticulum	2/891	16/10468	0.400561	0.991216	0.991216	CALM1/SRI	2
BP	GO:1990182	exosomal secretion	2/891	16/10468	0.400561	0.991216	0.991216	TSG101/COPS5	2
BP	GO:2000114	regulation of establishment of cell polarity	2/891	16/10468	0.400561	0.991216	0.991216	RAP1B/KRIT1	2
BP	GO:2000269	regulation of fibroblast apoptotic process	2/891	16/10468	0.400561	0.991216	0.991216	BTG1/STK17A	2
BP	GO:0007338	single fertilization	7/891	71/10468	0.400834	0.991216	0.991216	IGSF8/MFGE8/CATSPERG/CCT8/FOXL2/SLC9B1/POMZP3	7
BP	GO:0072384	organelle transport along microtubule	7/891	71/10468	0.400834	0.991216	0.991216	ARHGAP21/RHOT2/AP3D1/TRAK1/COPG1/AP3S1/AP3M2	7
BP	GO:0090087	regulation of peptide transport	39/891	437/10468	0.401553	0.991216	0.991216	EFCAB7/LEPROT/CD58/HAX1/MPC2/GLUL/TLR5/DNAJC1/MCU/TSG101/ZPR1/C2CD2L/OS9/MDM2/TGFB3/CDK5R1/MIDN/PDCD5/SAE1/FOXA2/EDEM1/TLR9/PDCD10/PARL/SLC7A11/ICE1/AGER/ADTRP/MAPK14/GOPC/SLC35D3/IL6/TOMM7/SRI/CYP51A1/ACHE/PCM1/UBR5/JAK2	39
BP	GO:0062012	regulation of small molecule metabolic process	29/891	322/10468	0.402625	0.991216	0.991216	SESN2/LEPR/PSMB4/PSMA1/NUP160/AAAS/ISCU/LCMT1/LONP2/PDPR/PSMB3/PSMD3/PDK2/SEH1L/MIDN/NR1H2/ODC1/PSMF1/FOXA2/SLC7A11/ME1/CYP51A1/NUP205/PPP1R3B/NCOA2/SQLE/PSMD5/SLC2A6/ATP7A	29
BP	GO:0001676	long-chain fatty acid metabolic process	6/891	60/10468	0.403557	0.991216	0.991216	SLC27A3/LOC344967/ACSL6/ADTRP/TBXAS1/SLC27A4	6
BP	GO:0022037	metencephalon development	6/891	60/10468	0.403557	0.991216	0.991216	GLI1/LHX5/CDK5R1/SEC24B/UQCRQ/ATP7A	6
BP	GO:0006364	rRNA processing	18/891	196/10468	0.403635	0.991216	0.991216	MRTO4/RPS27/ISG20L2/RRNAD1/NVL/HEATR1/DDX10/IMP3/PELP1/RPL26/WDR18/FBL/FAM207A/NSUN3/GAR1/RPL7L1/NSUN5/RPL35	18
BP	GO:0042445	hormone metabolic process	10/891	105/10468	0.403756	0.991216	0.991216	DHRS3/HSD17B7/CYP17A1/CYP2R1/HSD17B6/ALDH1A2/SULT1A1/TIPARP/STC2/ACHE	10
BP	GO:0032870	cellular response to hormone stimulus	40/891	449/10468	0.40422	0.991216	0.991216	LEPR/LEPROT/RAB13/NCOA4/EIF4EBP2/PDE3B/KAT5/PRCP/SIK2/RAP1B/MDM2/SOCS2/ESR2/NEDD4/APRT/ARRB2/CDK5R1/CDC6/PHB/PDK2/ZFP36/NR1H2/ZFP36L2/NRIP1/RUNX1/PRKAR2A/CPEB2/AP3S1/TAF7/NR3C1/ATP6V0E1/ATP6V1G2/ADTRP/PHIP/FOXO3/NCOA2/UBR5/JAK2/GKAP1/NR6A1	40
BP	GO:0010506	regulation of autophagy	24/891	265/10468	0.405778	0.991216	0.991216	SESN2/RRAGC/LEPR/HAX1/GBA/QSOX1/PIP4K2A/KAT5/ATM/NEDD4/ERCC4/IFT20/CDK5R1/TLK2/SUPT5H/TP53INP2/NPRL2/ATP6V0E1/ATP6V1G2/FOXO3/EPM2A/TOMM7/NAMPT/GOLGA2	24
BP	GO:0042180	cellular ketone metabolic process	15/891	162/10468	0.405854	0.991216	0.991216	PSMB4/CYP17A1/PSMA1/LONP2/PDPR/PSMB3/PSMD3/PDK2/NR1H2/ODC1/PSMF1/COQ2/SLC7A11/PSMD5/COQ4	15
BP	GO:0032609	interferon-gamma production	5/891	49/10468	0.405903	0.991216	0.991216	XCL1/FADD/IL18R1/TLR9/TXK	5
BP	GO:0046849	bone remodeling	5/891	49/10468	0.405903	0.991216	0.991216	LEPR/EFNA4/TGFB3/IL6/TMEM64	5
BP	GO:0006875	cellular metal ion homeostasis	26/891	288/10468	0.405985	0.991216	0.991216	CD52/PTGER3/XCL1/NCOA4/MCU/ISCU/FAM155A/CALM1/SLC24A1/NUBP1/AFG3L2/AP3D1/CYBRD1/ATF4/CCR4/FBXL5/STC2/BAK1/SRI/CUL1/TMEM64/MYC/JAK2/ACO1/LCN2/ATP7A	26
BP	GO:0009395	phospholipid catabolic process	3/891	27/10468	0.406985	0.991216	0.991216	SMPD1/GDE1/GDPD1	3
BP	GO:0010830	regulation of myotube differentiation	3/891	27/10468	0.406985	0.991216	0.991216	EHD2/RBM38/MAPK14	3
BP	GO:0032964	collagen biosynthetic process	3/891	27/10468	0.406985	0.991216	0.991216	TGFB3/ARRB2/IL6	3
BP	GO:0046685	response to arsenic-containing substance	3/891	27/10468	0.406985	0.991216	0.991216	ATF4/CPOX/CPEB2	3
BP	GO:0050885	neuromuscular process controlling balance	3/891	27/10468	0.406985	0.991216	0.991216	HMX3/GM2A/NBN	3
BP	GO:0055010	ventricular cardiac muscle tissue morphogenesis	3/891	27/10468	0.406985	0.991216	0.991216	TPM1/TNNC1/ZFPM2	3
BP	GO:0060323	head morphogenesis	3/891	27/10468	0.406985	0.991216	0.991216	ARID5B/TGFB3/TIPARP	3
BP	GO:0060612	adipose tissue development	3/891	27/10468	0.406985	0.991216	0.991216	ARID5B/ID2/PAXIP1	3
BP	GO:1903428	positive regulation of reactive oxygen species biosynthetic process	3/891	27/10468	0.406985	0.991216	0.991216	NOS1AP/FOXO3/JAK2	3
BP	GO:0043068	positive regulation of programmed cell death	39/891	438/10468	0.407368	0.991216	0.991216	STPG1/SFPQ/ITGB3BP/BCL10/SORT1/ITGB1/SMPD1/RAD9A/FADD/ATM/BTG1/PNMA1/TGFB3/ALDH1A2/ADAM10/ARRB2/RPL26/CDK5R1/PDCD5/CASP10/CASP8/ATF4/RYBP/C3orf38/FOXL2/ZMAT3/BCL6/FNIP1/EEF1E1/E2F3/BAK1/FOXO3/MAP3K5/SOD2/IL6/STK17A/YWHAZ/MYC/JAK2	39
BP	GO:0022412	cellular process involved in reproduction in multicellular organism	17/891	185/10468	0.407385	0.991216	0.991216	ITGB1/ATM/BRCA2/ARRB2/SPIRE1/KMT2B/PICK1/DMC1/MEI1/FOXL2/YTHDC2/GDF9/UBR2/PRDM1/FOXO3/POMZP3/TTC26	17
BP	GO:0030072	peptide hormone secretion	12/891	128/10468	0.407393	0.991216	0.991216	UBE2Q1/MPC2/GLUL/TACR2/MCU/CAMK2G/C2CD2L/MIDN/FOXA2/IL6/SRI/JAK2	12
BP	GO:0060047	heart contraction	12/891	128/10468	0.407393	0.991216	0.991216	NOS1AP/MDM2/CALM1/TPM1/MEF2A/MAP2K3/SPTBN4/EPAS1/TNNC1/SRI/TMEM65/JAK2	12
BP	GO:0000387	spliceosomal snRNP assembly	4/891	38/10468	0.40743	0.991216	0.991216	SNRPE/SART3/SNRPG/GEMIN8	4
BP	GO:0034103	regulation of tissue remodeling	4/891	38/10468	0.40743	0.991216	0.991216	LEPR/AGER/IL6/TMEM64	4
BP	GO:0042306	regulation of protein import into nucleus	4/891	38/10468	0.40743	0.991216	0.991216	EFCAB7/ZPR1/MAPK14/UBR5	4
BP	GO:0047496	vesicle transport along microtubule	4/891	38/10468	0.40743	0.991216	0.991216	AP3D1/TRAK1/AP3S1/AP3M2	4
BP	GO:0060135	maternal process involved in female pregnancy	4/891	38/10468	0.40743	0.991216	0.991216	HMX3/TMED2/STC2/PRDM1	4
BP	GO:0060760	positive regulation of response to cytokine stimulus	4/891	38/10468	0.40743	0.991216	0.991216	FADD/PARP14/UBE2K/TXK	4
BP	GO:0060761	negative regulation of response to cytokine stimulus	4/891	38/10468	0.40743	0.991216	0.991216	NR1H2/PARP14/IL6/CNOT7	4
BP	GO:0061178	regulation of insulin secretion involved in cellular response to glucose stimulus	4/891	38/10468	0.40743	0.991216	0.991216	MPC2/C2CD2L/FOXA2/SRI	4
BP	GO:1901028	regulation of mitochondrial outer membrane permeabilization involved in apoptotic signaling pathway	4/891	38/10468	0.40743	0.991216	0.991216	CASP8/BAK1/TMEM14A/YWHAZ	4
BP	GO:1990089	response to nerve growth factor	4/891	38/10468	0.40743	0.991216	0.991216	SORT1/ARPC3/TMEM108/FOXO3	4
BP	GO:1990090	cellular response to nerve growth factor stimulus	4/891	38/10468	0.40743	0.991216	0.991216	SORT1/ARPC3/TMEM108/FOXO3	4
BP	GO:2000243	positive regulation of reproductive process	4/891	38/10468	0.40743	0.991216	0.991216	YTHDC2/CITED2/POMZP3/ZFPM2	4
BP	GO:0099173	postsynapse organization	9/891	94/10468	0.407444	0.991216	0.991216	NOS1AP/GPHN/ADAM10/CDK5R1/PICK1/TMEM108/SLC7A11/FNTA/DLG3	9
BP	GO:0006164	purine nucleotide biosynthetic process	19/891	208/10468	0.408399	0.991216	0.991216	MPC2/HKDC1/NUP160/AAAS/ADPGK/PDPR/APRT/PDK2/NME1/SEH1L/ACSS2/SLC25A1/ADSL/SLC26A1/ACSL6/SLC35B3/OGDH/NUP205/SLC2A6	19
BP	GO:0060537	muscle tissue development	19/891	208/10468	0.408399	0.991216	0.991216	IGSF8/ZBTB18/ITGB1/BCL9L/ARID2/GLI1/ALDH1A2/TPM1/MEF2A/ARRB2/IFT20/ID2/FOXN2/TNNC1/FOXL2/TIPARP/JARID2/MAPK14/ZFPM2	19
BP	GO:0071900	regulation of protein serine/threonine kinase activity	31/891	346/10468	0.409118	0.991216	0.991216	SESN2/GBA/AIDA/CDKN1C/SMPD1/GTF2H1/TSG101/CCND1/CCND2/AJUBA/MAP4K5/TGFB3/CALM1/SPRED1/MAP2K3/CDK5R1/CDC6/TRIB2/PRKAR2A/MAPKAPK3/TLR9/PDCD10/FGF18/AGER/MAPK14/MAP3K5/MAP3K4/DBF4/TRIB1/JAK2/RGS3	31
BP	GO:1903311	regulation of mRNA metabolic process	25/891	277/10468	0.409546	0.991216	0.991216	PSMB4/CPEB3/PSMA1/ZC3H10/SART3/NSRP1/PSMB3/PSMD3/AXIN2/TNRC6C/ZFP36/SUPT5H/ZFP36L2/PSMF1/RBM38/RBM15B/TRA2B/SREK1/MAPK14/HNRNPA2B1/CNOT7/YWHAZ/SECISBP2/PSMD5/SET	25
BP	GO:0043488	regulation of mRNA stability	14/891	151/10468	0.409749	0.991216	0.991216	PSMB4/CPEB3/PSMA1/PSMB3/PSMD3/AXIN2/ZFP36/ZFP36L2/PSMF1/RBM38/MAPK14/YWHAZ/PSMD5/SET	14
BP	GO:0051701	interaction with host	14/891	151/10468	0.409749	0.991216	0.991216	XPR1/ITGB1/SMC3/TSG101/SELPLG/VPS18/TYRO3/NEDD4/CASP8/ZNF639/GYPA/SLC22A5/FUCA2/HIPK2	14
BP	GO:0061136	regulation of proteasomal protein catabolic process	14/891	151/10468	0.409749	0.991216	0.991216	GBA/OS9/MDM2/N4BP1/TLK2/TRIB2/PSMF1/USP25/EDEM1/RYBP/UBE2K/CSNK1A1/ANKIB1/TRIB1	14
BP	GO:0007169	transmembrane receptor protein tyrosine kinase signaling pathway	38/891	427/10468	0.410585	0.991216	0.991216	IFI6/LEPROT/SORT1/LRIG2/EFNA4/ARID5B/EIF4EBP2/TSG101/SIK2/SOCS2/ARPC3/SPRED1/TYRO3/NEDD4/MVP/IFT20/CDK5R1/PDK2/CHMP6/AP2S1/AKT1S1/ZGPAT/MAPKAPK3/TMEM108/TIPARP/AP3S1/FGF18/ATP6V0E1/ATP6V1G2/MAPK14/FRS3/PHIP/FOXO3/DOK2/JAK2/GKAP1/DNM1/EFNB1	38
BP	GO:0002220	innate immune response activating cell surface receptor signaling pathway	8/891	83/10468	0.411249	0.991216	0.991216	BCL10/PSMB4/PSMA1/PSMB3/PSMD3/PSMF1/CUL1/PSMD5	8
BP	GO:0002223	stimulatory C-type lectin receptor signaling pathway	8/891	83/10468	0.411249	0.991216	0.991216	BCL10/PSMB4/PSMA1/PSMB3/PSMD3/PSMF1/CUL1/PSMD5	8
BP	GO:0097696	STAT cascade	8/891	83/10468	0.411249	0.991216	0.991216	LEPROT/SOCS2/CRLF3/PARP14/HES1/IL6/CNOT7/JAK2	8
BP	GO:0002221	pattern recognition receptor signaling pathway	11/891	117/10468	0.411373	0.991216	0.991216	BCL10/TLR5/UNC93B1/FADD/TYRO3/ARRB2/EPG5/CASP8/MAPKAPK3/TLR9/LRRC14	11
BP	GO:2001251	negative regulation of chromosome organization	11/891	117/10468	0.411373	0.991216	0.991216	ATM/ERCC4/LCMT1/CDT1/XRCC5/TAF7/JARID2/PINX1/NBN/UBR5/SET	11
BP	GO:0001944	vasculature development	35/891	393/10468	0.414512	0.991216	0.991216	LEPR/WARS2/GLUL/ITGB1/PDE3B/PRCP/ARID2/MDM2/BTG1/TMED2/SPRED1/ALDH1A2/ADAM10/MFGE8/LTBP1/EPAS1/RUNX1/UBP1/TIPARP/PDCD10/HES1/SEC24B/FGF18/ADTRP/BAK1/MAPK14/PRDM1/SOD2/IL6/KRIT1/IMMP2L/HIPK2/PAXIP1/ZFPM2/ATP7A	35
BP	GO:0048194	Golgi vesicle budding	7/891	72/10468	0.415168	0.991216	0.991216	TMED2/SEC23A/MCFD2/SEC31A/SEC24B/SEC24D/GOLGA2	7
BP	GO:1903363	negative regulation of cellular protein catabolic process	7/891	72/10468	0.415168	0.991216	0.991216	OS9/N4BP1/TLK2/PSMF1/USP25/RYBP/HIPK2	7
BP	GO:0006140	regulation of nucleotide metabolic process	10/891	106/10468	0.415539	0.991216	0.991216	NUP160/AAAS/ISCU/PDPR/PDK2/SEH1L/ME1/NUP205/SLC2A6/ATP7A	10
BP	GO:0055082	cellular chemical homeostasis	39/891	440/10468	0.419033	0.991216	0.991216	CD52/PTGER3/MPC2/XCL1/XPR1/NCOA4/HKDC1/MCU/C2CD2L/ISCU/FAM155A/CALM1/SLC24A1/NUBP1/NME1/AFG3L2/AP3D1/CYBRD1/FOXA2/ATF4/CCR4/TRA2B/FBXL5/SLC9B1/DMXL1/ATP6V0E1/STC2/ATP6V1G2/AGER/BAK1/FOXO3/SRI/CUL1/TMEM64/MYC/JAK2/ACO1/LCN2/ATP7A	39
BP	GO:0008645	hexose transmembrane transport	6/891	61/10468	0.419181	0.991216	0.991216	SESN2/SORT1/MEF2A/SLC5A3/MAPK14/SLC2A6	6
BP	GO:0042278	purine nucleoside metabolic process	6/891	61/10468	0.419181	0.991216	0.991216	MAGI3/GPHN/HDDC3/APRT/NME1/AHCY	6
BP	GO:0030003	cellular cation homeostasis	30/891	336/10468	0.419234	0.991216	0.991216	CD52/PTGER3/XCL1/NCOA4/MCU/ISCU/FAM155A/CALM1/SLC24A1/NUBP1/AFG3L2/AP3D1/CYBRD1/ATF4/CCR4/FBXL5/SLC9B1/DMXL1/ATP6V0E1/STC2/ATP6V1G2/BAK1/SRI/CUL1/TMEM64/MYC/JAK2/ACO1/LCN2/ATP7A	30
BP	GO:0050801	ion homeostasis	37/891	417/10468	0.419864	0.991216	0.991216	CD52/IFI6/PTGER3/XCL1/XPR1/NCOA4/MCU/ISCU/FAM155A/CALM1/B2M/SLC24A1/NUBP1/PDK2/AFG3L2/AP3D1/EPAS1/CYBRD1/ATF4/CCR4/FBXL5/SLC9B1/SLC7A11/DMXL1/ATP6V0E1/STC2/ATP6V1G2/BAK1/SRI/TRIM24/CUL1/TMEM64/MYC/JAK2/ACO1/LCN2/ATP7A	37
BP	GO:0071229	cellular response to acid chemical	11/891	118/10468	0.422569	0.991216	0.991216	SESN2/RRAGC/CPEB3/ATM/ALDH1A2/NME1/XRCC5/CEBPB/CPEB4/UBR2/ATP7A	11
BP	GO:0002688	regulation of leukocyte chemotaxis	5/891	50/10468	0.423228	0.991216	0.991216	NBL1/XCL1/ADAM10/MAPK14/IL6	5
BP	GO:0043407	negative regulation of MAP kinase activity	5/891	50/10468	0.423228	0.991216	0.991216	GBA/AIDA/SMPD1/SPRED1/RGS3	5
BP	GO:0060840	artery development	5/891	50/10468	0.423228	0.991216	0.991216	ARID2/LTBP1/HES1/SEC24B/PRDM1	5
BP	GO:0090307	mitotic spindle assembly	5/891	50/10468	0.423228	0.991216	0.991216	NEK2/SMC3/AAAS/STAG1/GOLGA2	5
BP	GO:0071333	cellular response to glucose stimulus	8/891	84/10468	0.424551	0.991216	0.991216	MPC2/C2CD2L/NME1/FOXA2/TRA2B/AGER/FOXO3/SRI	8
BP	GO:0042326	negative regulation of phosphorylation	28/891	314/10468	0.426695	0.991216	0.991216	GBA/AIDA/CDKN1C/SMPD1/TSG101/C1QL4/AJUBA/CALM1/SPRED1/MVP/ARRB2/PHB/CHMP6/MIDN/AKT1S1/TRIB2/FOXA2/ZGPAT/PRKAR2A/NPRL2/PARP14/MECOM/TAF7/BAK1/PRKRIP1/TRIB1/MYC/RGS3	28
BP	GO:0030239	myofibril assembly	4/891	39/10468	0.427146	0.991216	0.991216	ITGB1/SYNPO2L/TPM1/MEF2A	4
BP	GO:0032506	cytokinetic process	4/891	39/10468	0.427146	0.991216	0.991216	ANXA11/CHMP6/SPIRE1/KIF20A	4
BP	GO:0046580	negative regulation of Ras protein signal transduction	4/891	39/10468	0.427146	0.991216	0.991216	ITGB1/TNFAIP1/BCL6/SCAI	4
BP	GO:0060420	regulation of heart growth	4/891	39/10468	0.427146	0.991216	0.991216	GLI1/JARID2/MAPK14/ZFPM2	4
BP	GO:2000514	regulation of CD4-positive, alpha-beta T cell activation	4/891	39/10468	0.427146	0.991216	0.991216	XCL1/RUNX1/BCL6/AGER	4
BP	GO:0008286	insulin receptor signaling pathway	10/891	107/10468	0.427321	0.991216	0.991216	EIF4EBP2/SIK2/SOCS2/PDK2/AP3S1/ATP6V0E1/ATP6V1G2/PHIP/FOXO3/GKAP1	10
BP	GO:0050714	positive regulation of protein secretion	12/891	130/10468	0.428769	0.991216	0.991216	CD58/MPC2/GLUL/MCU/C2CD2L/TGFB3/AGER/MAPK14/IL6/SRI/ACHE/JAK2	12
BP	GO:0070555	response to interleukin-1	12/891	130/10468	0.428769	0.991216	0.991216	PSMB4/XCL1/PSMA1/PSMB3/PSMD3/PSMF1/CEBPB/YTHDC2/IL6/CUL1/PSMD5/LCN2	12
BP	GO:1905475	regulation of protein localization to membrane	12/891	130/10468	0.428769	0.991216	0.991216	EFCAB7/ITGB1/STX3/GPC6/ADAM10/CDK5R1/PDCD5/CASP8/SLC7A11/GOPC/STX7/YWHAZ	12
BP	GO:1990778	protein localization to cell periphery	20/891	222/10468	0.429216	0.991216	0.991216	EFCAB7/RAB13/ITGB1/TSPAN14/STX3/TMED2/GPC6/SEC23A/AMN/ADAM10/NUBP1/IFT20/GGA3/SPTBN4/EHD2/ARFRP1/CLASP2/GOPC/STX7/MAP7	20
BP	GO:0043200	response to amino acid	7/891	73/10468	0.429475	0.991216	0.991216	SESN2/RRAGC/CPEB3/CEBPB/CPEB4/UBR2/ATP7A	7
BP	GO:0060964	regulation of gene silencing by miRNA	7/891	73/10468	0.429475	0.991216	0.991216	NUP160/AAAS/ZC3H10/AJUBA/SEH1L/ZFP36/NUP205	7
BP	GO:0016054	organic acid catabolic process	18/891	199/10468	0.429547	0.991216	0.991216	ALDH4A1/SESN2/GLUL/NPL/PCBD1/MTHFS/FAH/LONP2/GAD1/AHCY/XYLB/IDUA/AMACR/ADTRP/OGDH/DECR1/IDNK/SLC27A4	18
BP	GO:0046395	carboxylic acid catabolic process	18/891	199/10468	0.429547	0.991216	0.991216	ALDH4A1/SESN2/GLUL/NPL/PCBD1/MTHFS/FAH/LONP2/GAD1/AHCY/XYLB/IDUA/AMACR/ADTRP/OGDH/DECR1/IDNK/SLC27A4	18
BP	GO:0009896	positive regulation of catabolic process	29/891	326/10468	0.429693	0.991216	0.991216	SESN2/GBA/DTL/PIP4K2A/CPEB3/KAT5/ATM/MDM2/NEDD4/GGA3/TNRC6C/ZFP36/SUPT5H/TRIB2/ZFP36L2/TP53INP2/EDEM1/NPRL2/TIPARP/FBXL5/CSNK1A1/MYLIP/FOXO3/EPM2A/IL6/TOMM7/ANKIB1/CNOT7/TRIB1	29
BP	GO:0006506	GPI anchor biosynthetic process	3/891	28/10468	0.430433	0.991216	0.991216	PIGC/PIGZ/PIGY	3
BP	GO:0009593	detection of chemical stimulus	3/891	28/10468	0.430433	0.991216	0.991216	TGFB3/CALM1/FOXA2	3
BP	GO:0010458	exit from mitosis	3/891	28/10468	0.430433	0.991216	0.991216	CDC14A/CDKN1C/CLASP2	3
BP	GO:0021675	nerve development	3/891	28/10468	0.430433	0.991216	0.991216	LRIG2/AFG3L2/HES1	3
BP	GO:0021885	forebrain cell migration	3/891	28/10468	0.430433	0.991216	0.991216	TYRO3/CDK5R1/EFHC1	3
BP	GO:0032732	positive regulation of interleukin-1 production	3/891	28/10468	0.430433	0.991216	0.991216	CASP8/AGER/JAK2	3
BP	GO:0033574	response to testosterone	3/891	28/10468	0.430433	0.991216	0.991216	NASP/GBA/NME1	3
BP	GO:0042026	protein refolding	3/891	28/10468	0.430433	0.991216	0.991216	B2M/HSPA13/HSPA9	3
BP	GO:0042455	ribonucleoside biosynthetic process	3/891	28/10468	0.430433	0.991216	0.991216	APRT/NME1/UCKL1	3
BP	GO:0042490	mechanoreceptor differentiation	3/891	28/10468	0.430433	0.991216	0.991216	IFT20/HES1/SEC24B	3
BP	GO:0046622	positive regulation of organ growth	3/891	28/10468	0.430433	0.991216	0.991216	GLI1/MAPK14/ZFPM2	3
BP	GO:0050779	RNA destabilization	3/891	28/10468	0.430433	0.991216	0.991216	CPEB3/ZFP36/ZFP36L2	3
BP	GO:0051693	actin filament capping	3/891	28/10468	0.430433	0.991216	0.991216	CAPZA1/SPTBN4/VILL	3
BP	GO:0070979	protein K11-linked ubiquitination	3/891	28/10468	0.430433	0.991216	0.991216	ANAPC1/ANAPC4/CDC26	3
BP	GO:0071548	response to dexamethasone	3/891	28/10468	0.430433	0.991216	0.991216	GBA/NR3C1/FOXO3	3
BP	GO:0072678	T cell migration	3/891	28/10468	0.430433	0.991216	0.991216	XCL1/FADD/ADAM10	3
BP	GO:1901016	regulation of potassium ion transmembrane transporter activity	3/891	28/10468	0.430433	0.991216	0.991216	NOS1AP/NEDD4/NETO2	3
BP	GO:1904292	regulation of ERAD pathway	3/891	28/10468	0.430433	0.991216	0.991216	OS9/USP25/EDEM1	3
BP	GO:0001522	pseudouridine synthesis	2/891	17/10468	0.431112	0.991216	0.991216	GAR1/TRUB2	2
BP	GO:0001937	negative regulation of endothelial cell proliferation	2/891	17/10468	0.431112	0.991216	0.991216	PDCD10/KRIT1	2
BP	GO:0002686	negative regulation of leukocyte migration	2/891	17/10468	0.431112	0.991216	0.991216	NBL1/ADTRP	2
BP	GO:0007096	regulation of exit from mitosis	2/891	17/10468	0.431112	0.991216	0.991216	CDC14A/CDKN1C	2
BP	GO:0007431	salivary gland development	2/891	17/10468	0.431112	0.991216	0.991216	TGFB3/PLXNA1	2
BP	GO:0009220	pyrimidine ribonucleotide biosynthetic process	2/891	17/10468	0.431112	0.991216	0.991216	NME1/UCKL1	2
BP	GO:0010288	response to lead ion	2/891	17/10468	0.431112	0.991216	0.991216	CPOX/ATP7A	2
BP	GO:0010470	regulation of gastrulation	2/891	17/10468	0.431112	0.991216	0.991216	FOXA2/CLASP2	2
BP	GO:0010801	negative regulation of peptidyl-threonine phosphorylation	2/891	17/10468	0.431112	0.991216	0.991216	CALM1/SPRED1	2
BP	GO:0014072	response to isoquinoline alkaloid	2/891	17/10468	0.431112	0.991216	0.991216	FADD/MDM2	2
BP	GO:0032733	positive regulation of interleukin-10 production	2/891	17/10468	0.431112	0.991216	0.991216	XCL1/TLR9	2
BP	GO:0032800	receptor biosynthetic process	2/891	17/10468	0.431112	0.991216	0.991216	ACHE/JAK2	2
BP	GO:0035518	histone H2A monoubiquitination	2/891	17/10468	0.431112	0.991216	0.991216	PCGF2/RYBP	2
BP	GO:0035886	vascular smooth muscle cell differentiation	2/891	17/10468	0.431112	0.991216	0.991216	HES1/SOD2	2
BP	GO:0042269	regulation of natural killer cell mediated cytotoxicity	2/891	17/10468	0.431112	0.991216	0.991216	ARRB2/ULBP2	2
BP	GO:0042451	purine nucleoside biosynthetic process	2/891	17/10468	0.431112	0.991216	0.991216	APRT/NME1	2
BP	GO:0043278	response to morphine	2/891	17/10468	0.431112	0.991216	0.991216	FADD/MDM2	2
BP	GO:0044058	regulation of digestive system process	2/891	17/10468	0.431112	0.991216	0.991216	PTGER3/SLC22A5	2
BP	GO:0045724	positive regulation of cilium assembly	2/891	17/10468	0.431112	0.991216	0.991216	CCP110/ZMYND10	2
BP	GO:0046129	purine ribonucleoside biosynthetic process	2/891	17/10468	0.431112	0.991216	0.991216	APRT/NME1	2
BP	GO:0046132	pyrimidine ribonucleoside biosynthetic process	2/891	17/10468	0.431112	0.991216	0.991216	NME1/UCKL1	2
BP	GO:0051932	synaptic transmission, GABAergic	2/891	17/10468	0.431112	0.991216	0.991216	PLCL1/NISCH	2
BP	GO:0061756	leukocyte adhesion to vascular endothelial cell	2/891	17/10468	0.431112	0.991216	0.991216	ITGB1/SELPLG	2
BP	GO:0061952	midbody abscission	2/891	17/10468	0.431112	0.991216	0.991216	CHMP6/KIF20A	2
BP	GO:0071392	cellular response to estradiol stimulus	2/891	17/10468	0.431112	0.991216	0.991216	KAT5/NRIP1	2
BP	GO:0099084	postsynaptic specialization organization	2/891	17/10468	0.431112	0.991216	0.991216	TMEM108/DLG3	2
BP	GO:2000757	negative regulation of peptidyl-lysine acetylation	2/891	17/10468	0.431112	0.991216	0.991216	TAF7/SET	2
BP	GO:1901653	cellular response to peptide	23/891	257/10468	0.432256	0.991216	0.991216	LEPROT/RAB13/EIF4EBP2/PDE3B/SIK2/RAP1B/MDM2/SOCS2/APRT/CDC6/PDK2/PRKAR2A/CPEB2/KLF3/AP3S1/ATP6V0E1/ATP6V1G2/AGER/PHIP/FOXO3/NAMPT/JAK2/GKAP1	23
BP	GO:0035264	multicellular organism growth	9/891	96/10468	0.432386	0.991216	0.991216	ARID5B/CDKN1C/ATM/SOCS2/TMED2/RAI1/AFG3L2/SPTBN4/STC2	9
BP	GO:0045807	positive regulation of endocytosis	9/891	96/10468	0.432386	0.991216	0.991216	TSG101/RAB21/B2M/MFGE8/ARRB2/ACTN4/PICK1/DNM1/TOR1A	9
BP	GO:1901615	organic hydroxy compound metabolic process	28/891	315/10468	0.433601	0.991216	0.991216	DHRS3/LEPR/GBA/HSD17B7/PCBD1/SMPD1/CYP2R1/PTS/DPAGT1/NUDT4/CALM1/ALDH1A2/FAH/GDE1/SULT1A1/HSD3B7/GDPD1/EPAS1/PLCL1/ACSS2/SLC5A3/COQ2/SLC7A11/AMACR/PCBD2/CYP51A1/SQLE/ATP7A	28
BP	GO:0022407	regulation of cell-cell adhesion	19/891	211/10468	0.433611	0.991216	0.991216	PTPRU/BCL10/XCL1/FADD/PIEZO1/AP3D1/FOXA2/CEBPB/RUNX1/GRAP2/BCL6/HES1/AGER/ADTRP/MAPK14/CITED2/IL6/JAK2/EFNB1	19
BP	GO:0008033	tRNA processing	11/891	119/10468	0.433762	0.991216	0.991216	TRMT13/TRMT1L/ALKBH8/FAM98B/MTFMT/RPP14/NSUN3/TRMT10A/RPP21/TYW1B/METTL2B	11
BP	GO:1903039	positive regulation of leukocyte cell-cell adhesion	11/891	119/10468	0.433762	0.991216	0.991216	BCL10/XCL1/FADD/AP3D1/RUNX1/GRAP2/BCL6/HES1/AGER/IL6/EFNB1	11
BP	GO:0009166	nucleotide catabolic process	13/891	142/10468	0.434307	0.991216	0.991216	HKDC1/NUP160/AAAS/NUDT4/UNG/ADPGK/HDDC3/SEH1L/HINT1/NUDT1/OGDH/NUP205/SLC2A6	13
BP	GO:0002687	positive regulation of leukocyte migration	6/891	62/10468	0.434752	0.991216	0.991216	XCL1/FADD/ADAM10/AGER/MAPK14/IL6	6
BP	GO:0048013	ephrin receptor signaling pathway	6/891	62/10468	0.434752	0.991216	0.991216	EFNA4/ARPC3/CDK5R1/AP2S1/DNM1/EFNB1	6
BP	GO:1901879	regulation of protein depolymerization	6/891	62/10468	0.434752	0.991216	0.991216	CAPZA1/CKAP2/SPTBN4/SPEF1/CLASP2/VILL	6
BP	GO:0048568	embryonic organ development	22/891	246/10468	0.436535	0.991216	0.991216	HMX3/CDKN1C/ARID2/GLI1/TMED2/TGFB3/ALDH1A2/PCGF2/HOXB5/ID2/EPAS1/CASP8/CEBPB/NPHP3/FOXL2/TRA2B/HES1/SEC24B/PRDM1/CITED2/HIPK2/ZFPM2	22
BP	GO:0010038	response to metal ion	20/891	223/10468	0.437411	0.991216	0.991216	ANXA11/CYP2R1/CCND1/MDM2/GPHN/CALM1/B2M/NEDD4/MEF2A/CPNE2/ID2/CYBRD1/CASP8/ATF4/TNNC1/CPOX/SEC31A/NUDT1/ACO1/ATP7A	20
BP	GO:0071326	cellular response to monosaccharide stimulus	8/891	85/10468	0.437828	0.991216	0.991216	MPC2/C2CD2L/NME1/FOXA2/TRA2B/AGER/FOXO3/SRI	8
BP	GO:0071331	cellular response to hexose stimulus	8/891	85/10468	0.437828	0.991216	0.991216	MPC2/C2CD2L/NME1/FOXA2/TRA2B/AGER/FOXO3/SRI	8
BP	GO:0002237	response to molecule of bacterial origin	16/891	177/10468	0.438851	0.991216	0.991216	BCL10/SGMS1/B2M/ZFP36/NR1H2/CASP8/THBD/CEBPB/MAPKAPK3/TLR9/MGST2/MAPK14/IL6/TRIB1/JAK2/LCN2	16
BP	GO:0034404	nucleobase-containing small molecule biosynthetic process	16/891	177/10468	0.438851	0.991216	0.991216	HKDC1/NUP160/AAAS/NUDT4/UNG/ADPGK/HDDC3/APRT/NME1/SEH1L/UCKL1/HINT1/NUDT1/OGDH/NUP205/SLC2A6	16
BP	GO:0050678	regulation of epithelial cell proliferation	16/891	177/10468	0.438851	0.991216	0.991216	GLUL/CDKN1C/CCND1/GLI1/BRCA2/B2M/ALDH1A2/NME1/ZFP36/IFT80/PDCD10/HES1/KRIT1/CDK6/MYC/ATP7A	16
BP	GO:0051251	positive regulation of lymphocyte activation	14/891	154/10468	0.439307	0.991216	0.991216	BCL10/XCL1/FADD/ATAD5/AP3D1/RUNX1/GRAP2/TLR9/BCL6/HES1/AGER/IL6/PAXIP1/EFNB1	14
BP	GO:0010639	negative regulation of organelle organization	26/891	293/10468	0.441789	0.991216	0.991216	CAPZA1/NEK2/ATM/CKAP2/NUBP1/ERCC4/CCP110/LCMT1/CDT1/ARRB2/SPTBN4/EML2/XRCC5/SPEF1/PICK1/CLASP2/VILL/FNIP1/TAF7/JARID2/TMEM14A/PINX1/NBN/FBXO43/UBR5/SET	26
BP	GO:0055065	metal ion homeostasis	29/891	328/10468	0.443275	0.991216	0.991216	CD52/PTGER3/XCL1/NCOA4/MCU/ISCU/FAM155A/CALM1/B2M/SLC24A1/NUBP1/AFG3L2/AP3D1/EPAS1/CYBRD1/ATF4/CCR4/FBXL5/STC2/BAK1/SRI/TRIM24/CUL1/TMEM64/MYC/JAK2/ACO1/LCN2/ATP7A	29
BP	GO:0002495	antigen processing and presentation of peptide antigen via MHC class II	7/891	74/10468	0.443738	0.991216	0.991216	CAPZA1/SEC23A/AP2S1/SEC31A/SEC24B/SEC24D/DCTN6	7
BP	GO:0019886	antigen processing and presentation of exogenous peptide antigen via MHC class II	7/891	74/10468	0.443738	0.991216	0.991216	CAPZA1/SEC23A/AP2S1/SEC31A/SEC24B/SEC24D/DCTN6	7
BP	GO:0032635	interleukin-6 production	7/891	74/10468	0.443738	0.991216	0.991216	BCL10/GBA/ARRB2/CEBPB/TLR9/AGER/IL6	7
BP	GO:1901605	alpha-amino acid metabolic process	13/891	143/10468	0.444547	0.991216	0.991216	ALDH4A1/AZIN2/GLUL/PCBD1/MTHFS/FAH/ODC1/GAD1/AHCY/CRTAP/SLC7A11/OGDH/ATP7A	13
BP	GO:0007626	locomotory behavior	9/891	97/10468	0.444828	0.991216	0.991216	ARRB2/OLFM2/SPTBN4/ID2/GAD1/FOXA2/HIPK2/NCOA2/ATP7A	9
BP	GO:0097479	synaptic vesicle localization	9/891	97/10468	0.444828	0.991216	0.991216	STX3/RAP1B/VPS18/AP3D1/PIP5K1C/AP3S1/AP3M2/DNM1/TOR1A	9
BP	GO:0071375	cellular response to peptide hormone stimulus	20/891	224/10468	0.445607	0.991216	0.991216	LEPROT/RAB13/EIF4EBP2/PDE3B/SIK2/RAP1B/MDM2/SOCS2/APRT/CDC6/PDK2/PRKAR2A/CPEB2/AP3S1/ATP6V0E1/ATP6V1G2/PHIP/FOXO3/JAK2/GKAP1	20
BP	GO:0001656	metanephros development	4/891	40/10468	0.446689	0.991216	0.991216	GDF11/ID2/HES1/MYC	4
BP	GO:0002088	lens development in camera-type eye	4/891	40/10468	0.446689	0.991216	0.991216	CDKN1C/SLC7A11/HIPK2/TDRD7	4
BP	GO:0033627	cell adhesion mediated by integrin	4/891	40/10468	0.446689	0.991216	0.991216	ITGB1/PDE3B/LPXN/PIEZO1	4
BP	GO:0042093	T-helper cell differentiation	4/891	40/10468	0.446689	0.991216	0.991216	IL18R1/BCL6/IL6/ATP7A	4
BP	GO:0046323	glucose import	4/891	40/10468	0.446689	0.991216	0.991216	SESN2/SORT1/MEF2A/MAPK14	4
BP	GO:0120193	tight junction organization	4/891	40/10468	0.446689	0.991216	0.991216	RAB13/TGFB3/ACTN4/RUNX1	4
BP	GO:0007596	blood coagulation	18/891	201/10468	0.446847	0.991216	0.991216	CAPZA1/JMJD1C/HPS5/PRCP/TYRO3/ARRB2/MYL12A/EHD2/GGCX/FOXA2/THBD/PRKAR2A/SLC7A11/ADTRP/IL6/YWHAZ/ZFPM2/JAK2	18
BP	GO:0014706	striated muscle tissue development	18/891	201/10468	0.446847	0.991216	0.991216	IGSF8/ZBTB18/ITGB1/BCL9L/ARID2/GLI1/ALDH1A2/TPM1/MEF2A/ARRB2/IFT20/ID2/FOXN2/TNNC1/FOXL2/JARID2/MAPK14/ZFPM2	18
BP	GO:0042692	muscle cell differentiation	18/891	201/10468	0.446847	0.991216	0.991216	SORT1/ITGB1/SYNPO2L/BNIP2/TPM1/MEF2A/CDH15/ARRB2/IFT20/AFG3L2/OLFM2/EHD2/RBM38/HIRA/HES1/MED28/MAPK14/SOD2	18
BP	GO:0043408	regulation of MAPK cascade	36/891	410/10468	0.447701	0.991216	0.991216	MAGI3/GBA/XCL1/AIDA/SMPD1/TSG101/C1QL4/GDF11/RAP1B/AJUBA/MAP4K5/TGFB3/SPRED1/ARRB2/MAP2K3/PHB/PHLPP1/TRIB2/MAPKAPK3/TLR9/PDCD10/MECOM/GDF9/FGF18/AGER/MAPK14/MAP3K5/MAP3K4/IL6/KLHDC10/HIPK2/COPS5/TRIB1/MYC/JAK2/RGS3	36
BP	GO:0006888	ER to Golgi vesicle-mediated transport	16/891	178/10468	0.448042	0.991216	0.991216	CAPZA1/TMED2/SEC23A/GOSR1/COG1/SPTBN4/MCFD2/COPG1/SEC31A/SEC24B/SEC24D/TMED7/GOPC/BCAP29/DCTN6/GOLGA2	16
BP	GO:0051186	cofactor metabolic process	39/891	445/10468	0.448327	0.991216	0.991216	UROD/MPC2/HKDC1/PCBD1/FAR1/NUP160/PTS/AAAS/ISCU/GPHN/CALM1/AMN/ADPGK/MTHFS/NUBP1/PDPR/PDK2/RSAD1/SEH1L/CNDP2/AHCY/GGT7/ACSS2/SLC25A1/SLC25A38/CPOX/LOC344967/COQ2/SLC7A11/MGST2/ACSL6/PCBD2/HSPA9/ME1/OGDH/NAMPT/NUP205/COQ4/SLC2A6	39
BP	GO:0007254	JNK cascade	12/891	132/10468	0.450125	0.991216	0.991216	MAGI3/AIDA/MAP4K5/PHLPP1/TLR9/MECOM/AGER/MAP3K5/MAP3K4/HIPK2/COPS5/TRIB1	12
BP	GO:0000726	non-recombinational repair	6/891	63/10468	0.450249	0.991216	0.991216	KAT5/ATM/ERCC4/XRCC5/PAXIP1/NBN	6
BP	GO:0015749	monosaccharide transmembrane transport	6/891	63/10468	0.450249	0.991216	0.991216	SESN2/SORT1/MEF2A/SLC5A3/MAPK14/SLC2A6	6
BP	GO:0032436	positive regulation of proteasomal ubiquitin-dependent protein catabolic process	6/891	63/10468	0.450249	0.991216	0.991216	GBA/MDM2/TRIB2/CSNK1A1/ANKIB1/TRIB1	6
BP	GO:0046939	nucleotide phosphorylation	10/891	109/10468	0.45084	0.991216	0.991216	HKDC1/NUP160/AAAS/ADPGK/NME1/SEH1L/PNKP/OGDH/NUP205/SLC2A6	10
BP	GO:0008584	male gonad development	8/891	86/10468	0.451066	0.991216	0.991216	NASP/RAB13/NCOA4/ARID5B/CCND1/CITED2/NUDT1/ZFPM2	8
BP	GO:0031960	response to corticosteroid	8/891	86/10468	0.451066	0.991216	0.991216	PTPRU/GBA/CCND1/ZFP36/ZFP36L2/NR3C1/FOXO3/IL6	8
BP	GO:0070498	interleukin-1-mediated signaling pathway	8/891	86/10468	0.451066	0.991216	0.991216	PSMB4/PSMA1/PSMB3/PSMD3/PSMF1/IL6/CUL1/PSMD5	8
BP	GO:0072358	cardiovascular system development	35/891	399/10468	0.451586	0.991216	0.991216	LEPR/WARS2/GLUL/ITGB1/PDE3B/PRCP/ARID2/MDM2/BTG1/TMED2/SPRED1/ALDH1A2/ADAM10/MFGE8/LTBP1/EPAS1/RUNX1/UBP1/TIPARP/PDCD10/HES1/SEC24B/FGF18/ADTRP/BAK1/MAPK14/PRDM1/SOD2/IL6/KRIT1/IMMP2L/HIPK2/PAXIP1/ZFPM2/ATP7A	35
BP	GO:0019882	antigen processing and presentation	15/891	167/10468	0.453359	0.991216	0.991216	CAPZA1/PSMB4/PSMA1/SEC23A/B2M/PSMB3/PSMD3/AP3D1/AP2S1/PSMF1/SEC31A/SEC24B/SEC24D/DCTN6/PSMD5	15
BP	GO:0006505	GPI anchor metabolic process	3/891	29/10468	0.453538	0.991216	0.991216	PIGC/PIGZ/PIGY	3
BP	GO:0010390	histone monoubiquitination	3/891	29/10468	0.453538	0.991216	0.991216	PCGF2/ATXN7L3/RYBP	3
BP	GO:0015844	monoamine transport	3/891	29/10468	0.453538	0.991216	0.991216	PICK1/NISCH/TOR1A	3
BP	GO:0032570	response to progesterone	3/891	29/10468	0.453538	0.991216	0.991216	TGFB3/CATSPERG/NCOA2	3
BP	GO:0035036	sperm-egg recognition	3/891	29/10468	0.453538	0.991216	0.991216	CATSPERG/CCT8/POMZP3	3
BP	GO:0042987	amyloid precursor protein catabolic process	3/891	29/10468	0.453538	0.991216	0.991216	ADAM10/GGA3/AGER	3
BP	GO:0048645	animal organ formation	3/891	29/10468	0.453538	0.991216	0.991216	AXIN2/HES1/CITED2	3
BP	GO:0060338	regulation of type I interferon-mediated signaling pathway	3/891	29/10468	0.453538	0.991216	0.991216	FADD/UBE2K/CNOT7	3
BP	GO:0072577	endothelial cell apoptotic process	3/891	29/10468	0.453538	0.991216	0.991216	FOXO3/MAP3K5/KRIT1	3
BP	GO:0005996	monosaccharide metabolic process	18/891	202/10468	0.455493	0.991216	0.991216	SESN2/LEPR/HKDC1/FUT8/ADPGK/MAN2C1/LCMT1/PDK2/MIDN/FOXA2/SLC25A1/ATF4/XYLB/NISCH/MAPK14/FUCA2/PPP1R3B/NCOA2	18
BP	GO:0050817	coagulation	18/891	202/10468	0.455493	0.991216	0.991216	CAPZA1/JMJD1C/HPS5/PRCP/TYRO3/ARRB2/MYL12A/EHD2/GGCX/FOXA2/THBD/PRKAR2A/SLC7A11/ADTRP/IL6/YWHAZ/ZFPM2/JAK2	18
BP	GO:0060326	cell chemotaxis	11/891	121/10468	0.456102	0.991216	0.991216	NBL1/RAB13/XCL1/ADAM10/HSD3B7/ARRB2/PIP5K1C/CCR4/FGF18/MAPK14/IL6	11
BP	GO:0010608	posttranscriptional regulation of gene expression	43/891	493/10468	0.456431	0.991216	0.991216	SESN2/PSMB4/SRP9/DNAJC1/EIF4EBP2/CPEB3/PSMA1/NUP160/AAAS/ZC3H10/AJUBA/RPL26/PSMB3/PSMD3/AXIN2/TNRC6C/SEH1L/ZFP36/RPL13A/ZFP36L2/PSMF1/RBM38/ATF4/POLDIP3/EIF1B/EIF4E3/NSUN3/CPEB2/CPEB4/MAPK14/FOXO3/IL6/HNRNPA2B1/NUP205/CNOT7/YWHAZ/ZNF706/ACO1/SECISBP2/TDRD7/PSMD5/TRUB2/SET	43
BP	GO:0033273	response to vitamin	5/891	52/10468	0.457564	0.991216	0.991216	CCND1/MDM2/ALDH1A2/STC2/TRIM24	5
BP	GO:0002504	antigen processing and presentation of peptide or polysaccharide antigen via MHC class II	7/891	75/10468	0.457939	0.991216	0.991216	CAPZA1/SEC23A/AP2S1/SEC31A/SEC24B/SEC24D/DCTN6	7
BP	GO:0030856	regulation of epithelial cell differentiation	7/891	75/10468	0.457939	0.991216	0.991216	CDKN1C/CCND1/BTG1/ZFP36/CEBPB/RUNX1/HES1	7
BP	GO:0032355	response to estradiol	7/891	75/10468	0.457939	0.991216	0.991216	KAT5/CCND1/SOCS2/ALDH1A2/MMP15/CASP8/NRIP1	7
BP	GO:0002460	adaptive immune response based on somatic recombination of immune receptors built from immunoglobulin superfamily domains	14/891	156/10468	0.45899	0.991216	0.991216	BCL10/XCL1/FADD/UNG/B2M/ATAD5/IL18R1/BCL6/AGER/STX7/ULBP2/IL6/PAXIP1/NBN	14
BP	GO:0043487	regulation of RNA stability	14/891	156/10468	0.45899	0.991216	0.991216	PSMB4/CPEB3/PSMA1/PSMB3/PSMD3/AXIN2/ZFP36/ZFP36L2/PSMF1/RBM38/MAPK14/YWHAZ/PSMD5/SET	14
BP	GO:0032101	regulation of response to external stimulus	36/891	412/10468	0.459915	0.991216	0.991216	NBL1/PTPRF/ARTN/PTGER3/LRIG2/PSMB4/GBA/XCL1/CFH/PSMA1/STX3/ATM/CALM1/TYRO3/ADAM10/GPRC5B/SETD6/PHB/FOXA2/THBD/CEBPB/CCR4/CLASP2/TLR9/BCL6/MGST2/OSMR/FGF18/AGER/ADTRP/MAPK14/IL6/TRIM24/FNTA/TRIB1/JAK2	36
BP	GO:0003015	heart process	12/891	133/10468	0.460777	0.991216	0.991216	NOS1AP/MDM2/CALM1/TPM1/MEF2A/MAP2K3/SPTBN4/EPAS1/TNNC1/SRI/TMEM65/JAK2	12
BP	GO:0002715	regulation of natural killer cell mediated immunity	2/891	18/10468	0.460811	0.991216	0.991216	ARRB2/ULBP2	2
BP	GO:0006488	dolichol-linked oligosaccharide biosynthetic process	2/891	18/10468	0.460811	0.991216	0.991216	ALG9/DPAGT1	2
BP	GO:0006862	nucleotide transport	2/891	18/10468	0.460811	0.991216	0.991216	EPG5/SLC35B3	2
BP	GO:0007063	regulation of sister chromatid cohesion	2/891	18/10468	0.460811	0.991216	0.991216	SFPQ/AXIN2	2
BP	GO:0007064	mitotic sister chromatid cohesion	2/891	18/10468	0.460811	0.991216	0.991216	PDS5A/BOD1	2
BP	GO:0007520	myoblast fusion	2/891	18/10468	0.460811	0.991216	0.991216	EHD2/MAPK14	2
BP	GO:0008053	mitochondrial fusion	2/891	18/10468	0.460811	0.991216	0.991216	AFG3L2/BAK1	2
BP	GO:0009264	deoxyribonucleotide catabolic process	2/891	18/10468	0.460811	0.991216	0.991216	UNG/NUDT1	2
BP	GO:0009620	response to fungus	2/891	18/10468	0.460811	0.991216	0.991216	BCL10/BAK1	2
BP	GO:0010155	regulation of proton transport	2/891	18/10468	0.460811	0.991216	0.991216	ACTN4/ATP7A	2
BP	GO:0032799	low-density lipoprotein receptor particle metabolic process	2/891	18/10468	0.460811	0.991216	0.991216	AP2S1/MYLIP	2
BP	GO:0032878	regulation of establishment or maintenance of cell polarity	2/891	18/10468	0.460811	0.991216	0.991216	RAP1B/KRIT1	2
BP	GO:0034471	ncRNA 5'-end processing	2/891	18/10468	0.460811	0.991216	0.991216	RPP14/RPP21	2
BP	GO:0040020	regulation of meiotic nuclear division	2/891	18/10468	0.460811	0.991216	0.991216	GPR3/FBXO43	2
BP	GO:0043555	regulation of translation in response to stress	2/891	18/10468	0.460811	0.991216	0.991216	SESN2/ATF4	2
BP	GO:0046639	negative regulation of alpha-beta T cell differentiation	2/891	18/10468	0.460811	0.991216	0.991216	RUNX1/BCL6	2
BP	GO:0048679	regulation of axon regeneration	2/891	18/10468	0.460811	0.991216	0.991216	PTPRF/LRIG2	2
BP	GO:0051290	protein heterotetramerization	2/891	18/10468	0.460811	0.991216	0.991216	RCC1/RRM2	2
BP	GO:0070050	neuron cellular homeostasis	2/891	18/10468	0.460811	0.991216	0.991216	TYRO3/IL6	2
BP	GO:0071243	cellular response to arsenic-containing substance	2/891	18/10468	0.460811	0.991216	0.991216	ATF4/CPEB2	2
BP	GO:0098780	response to mitochondrial depolarisation	2/891	18/10468	0.460811	0.991216	0.991216	GBA/TOMM7	2
BP	GO:0140112	extracellular vesicle biogenesis	2/891	18/10468	0.460811	0.991216	0.991216	TSG101/COPS5	2
BP	GO:1901099	negative regulation of signal transduction in absence of ligand	2/891	18/10468	0.460811	0.991216	0.991216	IFI6/EYA3	2
BP	GO:1901385	regulation of voltage-gated calcium channel activity	2/891	18/10468	0.460811	0.991216	0.991216	NOS1AP/SRI	2
BP	GO:1901673	regulation of mitotic spindle assembly	2/891	18/10468	0.460811	0.991216	0.991216	SMC3/STAG1	2
BP	GO:1903203	regulation of oxidative stress-induced neuron death	2/891	18/10468	0.460811	0.991216	0.991216	ATF4/SLC7A11	2
BP	GO:1903599	positive regulation of autophagy of mitochondrion	2/891	18/10468	0.460811	0.991216	0.991216	GBA/TOMM7	2
BP	GO:2000637	positive regulation of gene silencing by miRNA	2/891	18/10468	0.460811	0.991216	0.991216	AJUBA/ZFP36	2
BP	GO:2001240	negative regulation of extrinsic apoptotic signaling pathway in absence of ligand	2/891	18/10468	0.460811	0.991216	0.991216	IFI6/EYA3	2
BP	GO:0008016	regulation of heart contraction	10/891	110/10468	0.462556	0.991216	0.991216	NOS1AP/MDM2/CALM1/TPM1/MEF2A/SPTBN4/EPAS1/SRI/TMEM65/JAK2	10
BP	GO:0043543	protein acylation	18/891	203/10468	0.464131	0.991216	0.991216	GLUL/ZDHHC5/KAT5/NAA25/BRCA2/NAA16/BRD7/PCGF2/KAT7/ZDHHC19/JADE1/BRD8/TAF7/ZDHHC14/OGDH/PAXIP1/SET/ZDHHC12	18
BP	GO:0030260	entry into host cell	8/891	87/10468	0.464251	0.991216	0.991216	XPR1/ITGB1/SELPLG/VPS18/TYRO3/ZNF639/GYPA/FUCA2	8
BP	GO:0044409	entry into host	8/891	87/10468	0.464251	0.991216	0.991216	XPR1/ITGB1/SELPLG/VPS18/TYRO3/ZNF639/GYPA/FUCA2	8
BP	GO:0046546	development of primary male sexual characteristics	8/891	87/10468	0.464251	0.991216	0.991216	NASP/RAB13/NCOA4/ARID5B/CCND1/CITED2/NUDT1/ZFPM2	8
BP	GO:0051806	entry into cell of other organism involved in symbiotic interaction	8/891	87/10468	0.464251	0.991216	0.991216	XPR1/ITGB1/SELPLG/VPS18/TYRO3/ZNF639/GYPA/FUCA2	8
BP	GO:0051828	entry into other organism involved in symbiotic interaction	8/891	87/10468	0.464251	0.991216	0.991216	XPR1/ITGB1/SELPLG/VPS18/TYRO3/ZNF639/GYPA/FUCA2	8
BP	GO:0009165	nucleotide biosynthetic process	24/891	273/10468	0.465479	0.991216	0.991216	MPC2/HKDC1/NUP160/AAAS/ADPGK/PDPR/APRT/PDK2/NME1/SEH1L/PNKP/RRM2/ACSS2/UCKL1/SLC25A1/ADSL/SLC26A1/ACSL6/SLC35B3/ME1/OGDH/NAMPT/NUP205/SLC2A6	24
BP	GO:0031623	receptor internalization	6/891	64/10468	0.46565	0.991216	0.991216	ITGB1/NEDD4/ARRB2/PICK1/ACHE/DNM1	6
BP	GO:0060048	cardiac muscle contraction	6/891	64/10468	0.46565	0.991216	0.991216	NOS1AP/CALM1/TPM1/MAP2K3/TNNC1/SRI	6
BP	GO:0032386	regulation of intracellular transport	27/891	308/10468	0.465798	0.991216	0.991216	EFCAB7/LEPROT/HAX1/ZPR1/AAAS/OS9/RAP1B/MDM2/RAB21/VPS18/NEDD4/SPAG5/CDK5R1/PDCD5/SAE1/EHD2/EDEM1/TNNC1/PDCD10/PARL/SEC24B/ICE1/MAPK14/SLC35D3/TOMM7/PCM1/UBR5	27
BP	GO:0002287	alpha-beta T cell activation involved in immune response	4/891	41/10468	0.46602	0.991216	0.991216	IL18R1/BCL6/IL6/ATP7A	4
BP	GO:0002293	alpha-beta T cell differentiation involved in immune response	4/891	41/10468	0.46602	0.991216	0.991216	IL18R1/BCL6/IL6/ATP7A	4
BP	GO:0002294	CD4-positive, alpha-beta T cell differentiation involved in immune response	4/891	41/10468	0.46602	0.991216	0.991216	IL18R1/BCL6/IL6/ATP7A	4
BP	GO:0007631	feeding behavior	4/891	41/10468	0.46602	0.991216	0.991216	LEPR/UBE2Q1/MMP17/CFAP20	4
BP	GO:0009798	axis specification	4/891	41/10468	0.46602	0.991216	0.991216	TMED2/FOXA2/ETS2/CITED2	4
BP	GO:0035306	positive regulation of dephosphorylation	4/891	41/10468	0.46602	0.991216	0.991216	GBA/SMPD1/CALM1/JAK2	4
BP	GO:0042982	amyloid precursor protein metabolic process	4/891	41/10468	0.46602	0.991216	0.991216	ADAM10/GGA3/AGER/ACHE	4
BP	GO:1901068	guanosine-containing compound metabolic process	4/891	41/10468	0.46602	0.991216	0.991216	MAGI3/GPHN/HDDC3/NME1	4
BP	GO:1902017	regulation of cilium assembly	4/891	41/10468	0.46602	0.991216	0.991216	CCP110/IFT20/ZMYND10/VDAC3	4
BP	GO:0007159	leukocyte cell-cell adhesion	16/891	180/10468	0.466394	0.991216	0.991216	BCL10/XCL1/ITGB1/FADD/SELPLG/AP3D1/CEBPB/RUNX1/GRAP2/BCL6/HES1/STK10/AGER/ADTRP/IL6/EFNB1	16
BP	GO:0071902	positive regulation of protein serine/threonine kinase activity	19/891	215/10468	0.467246	0.991216	0.991216	CCND1/CCND2/AJUBA/MAP4K5/TGFB3/CALM1/MAP2K3/CDK5R1/CDC6/MAPKAPK3/TLR9/PDCD10/FGF18/AGER/MAPK14/MAP3K5/MAP3K4/DBF4/JAK2	19
BP	GO:0046879	hormone secretion	14/891	157/10468	0.468806	0.991216	0.991216	UBE2Q1/MPC2/GLUL/TACR2/MCU/CAMK2G/C2CD2L/MIDN/FOXA2/FOXL2/GDF9/IL6/SRI/JAK2	14
BP	GO:2000116	regulation of cysteine-type endopeptidase activity	14/891	157/10468	0.468806	0.991216	0.991216	IFI6/BCL10/FADD/MDM2/ARRB2/PDCD5/CASP10/CASP8/FOXL2/FNIP1/BAK1/MAP3K5/MYC/JAK2	14
BP	GO:0001678	cellular glucose homeostasis	9/891	99/10468	0.469597	0.991216	0.991216	MPC2/HKDC1/C2CD2L/NME1/FOXA2/TRA2B/AGER/FOXO3/SRI	9
BP	GO:0060968	regulation of gene silencing	9/891	99/10468	0.469597	0.991216	0.991216	NUP160/AAAS/ZC3H10/AJUBA/SEH1L/ZFP36/HIRA/CDC45/NUP205	9
BP	GO:0031330	negative regulation of cellular catabolic process	17/891	192/10468	0.469687	0.991216	0.991216	LEPR/LRIG2/QSOX1/OS9/N4BP1/TLK2/AXIN2/ZFP36/PSMF1/RBM38/USP25/RYBP/MAPK14/NAMPT/HIPK2/SECISBP2/GOLGA2	17
BP	GO:0005976	polysaccharide metabolic process	7/891	76/10468	0.472063	0.991216	0.991216	LEPR/CSGALNACT2/EXT2/CALM1/PHKB/B3GNT2/PPP1R3B	7
BP	GO:0009799	specification of symmetry	7/891	76/10468	0.472063	0.991216	0.991216	NBL1/AIDA/TMED2/ALDH1A2/DAND5/NPHP3/CITED2	7
BP	GO:0009855	determination of bilateral symmetry	7/891	76/10468	0.472063	0.991216	0.991216	NBL1/AIDA/TMED2/ALDH1A2/DAND5/NPHP3/CITED2	7
BP	GO:0060147	regulation of posttranscriptional gene silencing	7/891	76/10468	0.472063	0.991216	0.991216	NUP160/AAAS/ZC3H10/AJUBA/SEH1L/ZFP36/NUP205	7
BP	GO:0060966	regulation of gene silencing by RNA	7/891	76/10468	0.472063	0.991216	0.991216	NUP160/AAAS/ZC3H10/AJUBA/SEH1L/ZFP36/NUP205	7
BP	GO:0001655	urogenital system development	15/891	169/10468	0.472311	0.991216	0.991216	ARID5B/CDKN1C/NUP160/FADD/GDF11/GLI1/MMP17/ALDH1A2/IFT20/ID2/ODC1/NPHP3/TIPARP/HES1/MYC	15
BP	GO:0007599	hemostasis	18/891	204/10468	0.472757	0.991216	0.991216	CAPZA1/JMJD1C/HPS5/PRCP/TYRO3/ARRB2/MYL12A/EHD2/GGCX/FOXA2/THBD/PRKAR2A/SLC7A11/ADTRP/IL6/YWHAZ/ZFPM2/JAK2	18
BP	GO:0018105	peptidyl-serine phosphorylation	18/891	204/10468	0.472757	0.991216	0.991216	CDC7/HAX1/ATM/ARRB2/CDK5R1/TLK2/SPTBN4/TLK1/PLCL1/MAPKAPK3/PDCD10/FNIP1/CSNK1A1/BAK1/MAPK14/IL6/HIPK2/PKN3	18
BP	GO:0043484	regulation of RNA splicing	10/891	111/10468	0.474232	0.991216	0.991216	ZPR1/ZC3H10/SART3/NSRP1/RBM38/RBM15B/TRA2B/SREK1/HNRNPA2B1/PTBP3	10
BP	GO:0042255	ribosome assembly	5/891	53/10468	0.474519	0.991216	0.991216	MRTO4/RPS27/MRPS7/RPL3/MRPL22	5
BP	GO:0051928	positive regulation of calcium ion transport	5/891	53/10468	0.474519	0.991216	0.991216	XCL1/CALM1/ARRB2/BAK1/SRI	5
BP	GO:0060021	roof of mouth development	5/891	53/10468	0.474519	0.991216	0.991216	DHRS3/ARID5B/GDF11/TGFB3/TIPARP	5
BP	GO:0065002	intracellular protein transmembrane transport	5/891	53/10468	0.474519	0.991216	0.991216	LONP2/TIMM21/TIMM44/CHCHD4/TOMM7	5
BP	GO:0097006	regulation of plasma lipoprotein particle levels	5/891	53/10468	0.474519	0.991216	0.991216	AMN/AP2S1/MTTP/MYLIP/BMP1	5
BP	GO:0006109	regulation of carbohydrate metabolic process	13/891	146/10468	0.475166	0.991216	0.991216	SESN2/LEPR/NUP160/AAAS/LCMT1/PDK2/SEH1L/MIDN/FOXA2/NUP205/PPP1R3B/NCOA2/SLC2A6	13
BP	GO:0018108	peptidyl-tyrosine phosphorylation	19/891	216/10468	0.475633	0.991216	0.991216	TESK2/HAX1/TSG101/TYRO3/GPRC5B/MVP/ARRB2/MAP2K3/CHMP6/ZGPAT/PARP14/HES1/TXK/IL6/NCAPG2/CNOT7/JAK2/DLG3/RAP2C	19
BP	GO:0002066	columnar/cuboidal epithelial cell development	3/891	30/10468	0.476242	0.991216	0.991216	SEC24B/PRDM1/CDK6	3
BP	GO:0010596	negative regulation of endothelial cell migration	3/891	30/10468	0.476242	0.991216	0.991216	SPRED1/PDCD10/KRIT1	3
BP	GO:0014009	glial cell proliferation	3/891	30/10468	0.476242	0.991216	0.991216	LEPR/HES1/IL6	3
BP	GO:0031638	zymogen activation	3/891	30/10468	0.476242	0.991216	0.991216	FADD/CASP8/BAK1	3
BP	GO:0033628	regulation of cell adhesion mediated by integrin	3/891	30/10468	0.476242	0.991216	0.991216	PDE3B/LPXN/PIEZO1	3
BP	GO:0051496	positive regulation of stress fiber assembly	3/891	30/10468	0.476242	0.991216	0.991216	SYNPO2L/TGFB3/TPM1	3
BP	GO:0061098	positive regulation of protein tyrosine kinase activity	3/891	30/10468	0.476242	0.991216	0.991216	GPRC5B/NCAPG2/DLG3	3
BP	GO:1900408	negative regulation of cellular response to oxidative stress	3/891	30/10468	0.476242	0.991216	0.991216	ATF4/SLC7A11/SOD2	3
BP	GO:1903202	negative regulation of oxidative stress-induced cell death	3/891	30/10468	0.476242	0.991216	0.991216	ATF4/SLC7A11/SOD2	3
BP	GO:0009408	response to heat	11/891	123/10468	0.478325	0.991216	0.991216	IER5/CAMK2G/NUP160/CLPB/ATM/AAAS/SEH1L/AKT1S1/HSPA13/HSPA9/NUP205	11
BP	GO:0030177	positive regulation of Wnt signaling pathway	11/891	123/10468	0.478325	0.991216	0.991216	PSMB4/BAMBI/FAM53B/PSMA1/GPRC5B/PSMB3/PSMD3/AXIN2/PSMF1/UBR5/PSMD5	11
BP	GO:0043112	receptor metabolic process	11/891	123/10468	0.478325	0.991216	0.991216	ITGB1/FUT8/NEDD4/ARRB2/AP2S1/PICK1/MYLIP/ACHE/FNTA/JAK2/DNM1	11
BP	GO:0016072	rRNA metabolic process	20/891	228/10468	0.478341	0.991216	0.991216	MRTO4/RPS27/ISG20L2/RRNAD1/NVL/HEATR1/DDX10/IMP3/PELP1/RPL26/WDR18/FBL/FAM207A/NSUN3/GAR1/RPL7L1/GTF3C6/NSUN5/POLR1E/RPL35	20
BP	GO:0034219	carbohydrate transmembrane transport	6/891	65/10468	0.480936	0.991216	0.991216	SESN2/SORT1/MEF2A/SLC5A3/MAPK14/SLC2A6	6
BP	GO:0044766	multi-organism transport	6/891	65/10468	0.480936	0.991216	0.991216	TSG101/NUP160/AAAS/SEH1L/NUP205/VPS37A	6
BP	GO:1902579	multi-organism localization	6/891	65/10468	0.480936	0.991216	0.991216	TSG101/NUP160/AAAS/SEH1L/NUP205/VPS37A	6
BP	GO:0007369	gastrulation	9/891	100/10468	0.481901	0.991216	0.991216	ITGB1/EXT2/MMP15/FOXA2/ARFRP1/ETS2/HIRA/CLASP2/NPHP3	9
BP	GO:0007565	female pregnancy	9/891	100/10468	0.481901	0.991216	0.991216	UBE2Q1/HMX3/PTHLH/TMED2/TGFB3/THBD/STC2/PRDM1/NAMPT	9
BP	GO:0016999	antibiotic metabolic process	9/891	100/10468	0.481901	0.991216	0.991216	SDHB/NPL/SDHD/MTHFS/SULT1A1/ACSS2/ST6GAL1/OGDH/ACO1	9
BP	GO:0034341	response to interferon-gamma	9/891	100/10468	0.481901	0.991216	0.991216	CD58/XCL1/CAMK2G/B2M/RPL13A/NR1H2/PARP14/TXK/JAK2	9
BP	GO:1901699	cellular response to nitrogen compound	35/891	404/10468	0.482533	0.991216	0.991216	SESN2/RRAGC/LEPROT/RAB13/EIF4EBP2/CPEB3/PDE3B/SIK2/RAP1B/MDM2/SOCS2/RAD51/APRT/CDK5R1/CDC6/PDK2/EPG5/CEBPB/ATF4/PRKAR2A/CPEB2/KLF3/AP3S1/ATP6V0E1/CPEB4/ATP6V1G2/AGER/UBR2/PHIP/FOXO3/MAP3K5/NAMPT/JAK2/GKAP1/ATP7A	35
BP	GO:0001756	somitogenesis	4/891	42/10468	0.485102	0.991216	0.991216	ATM/TMED2/ALDH1A2/AXIN2	4
BP	GO:0002690	positive regulation of leukocyte chemotaxis	4/891	42/10468	0.485102	0.991216	0.991216	XCL1/ADAM10/MAPK14/IL6	4
BP	GO:0007422	peripheral nervous system development	4/891	42/10468	0.485102	0.991216	0.991216	ARTN/SLC5A3/RUNX1/SERPINI1	4
BP	GO:0032651	regulation of interleukin-1 beta production	4/891	42/10468	0.485102	0.991216	0.991216	ARRB2/CASP8/AGER/JAK2	4
BP	GO:1901019	regulation of calcium ion transmembrane transporter activity	4/891	42/10468	0.485102	0.991216	0.991216	NOS1AP/CALM1/TLR9/SRI	4
BP	GO:1905268	negative regulation of chromatin organization	4/891	42/10468	0.485102	0.991216	0.991216	TAF7/JARID2/UBR5/SET	4
BP	GO:0043393	regulation of protein binding	13/891	147/10468	0.485318	0.991216	0.991216	STPG1/PTPRF/AIDA/NVL/BAMBI/PCBD1/B2M/AKTIP/ARRB2/PLCL1/BAK1/HIPK2/GOLGA2	13
BP	GO:1901292	nucleoside phosphate catabolic process	13/891	147/10468	0.485318	0.991216	0.991216	HKDC1/NUP160/AAAS/NUDT4/UNG/ADPGK/HDDC3/SEH1L/HINT1/NUDT1/OGDH/NUP205/SLC2A6	13
BP	GO:0035195	gene silencing by miRNA	10/891	112/10468	0.485856	0.991216	0.991216	NUP160/AAAS/ZC3H10/AJUBA/TNRC6C/SEH1L/ZFP36/HNRNPA2B1/NUP205/CNOT7	10
BP	GO:0071396	cellular response to lipid	30/891	346/10468	0.485986	0.991216	0.991216	BCL10/NCOA4/SGMS1/KAT5/ATM/ESR2/NEDD4/ALDH1A2/ARRB2/PHB/NME1/ZFP36/NR1H2/ZFP36L2/XRCC5/CEBPB/NRIP1/RUNX1/TAF7/NR3C1/ADTRP/MAPK14/FOXO3/IL6/TRIM24/UBR5/TRIB1/JAK2/NR6A1/LCN2	30
BP	GO:0009119	ribonucleoside metabolic process	7/891	77/10468	0.486092	0.991216	0.991216	MAGI3/GPHN/HDDC3/APRT/NME1/AHCY/UCKL1	7
BP	GO:0043534	blood vessel endothelial cell migration	7/891	77/10468	0.486092	0.991216	0.991216	ITGB1/PRCP/SPRED1/MAP2K3/PDCD10/FGF18/ADTRP	7
BP	GO:0046718	viral entry into host cell	7/891	77/10468	0.486092	0.991216	0.991216	XPR1/ITGB1/SELPLG/VPS18/TYRO3/ZNF639/GYPA	7
BP	GO:0042060	wound healing	28/891	323/10468	0.488873	0.991216	0.991216	CAPZA1/JMJD1C/HPS5/PRCP/AJUBA/TGFB3/TYRO3/TPM1/ARRB2/MYL12A/EHD2/GGCX/FOXA2/THBD/CLASP2/PRKAR2A/PDCD10/SLC7A11/AGER/ADTRP/C6orf89/MAP3K5/IL6/YWHAZ/ZFPM2/JAK2/NINJ1/TOR1A	28
BP	GO:0000966	RNA 5'-end processing	2/891	19/10468	0.489583	0.991216	0.991216	RPP14/RPP21	2
BP	GO:0001702	gastrulation with mouth forming second	2/891	19/10468	0.489583	0.991216	0.991216	FOXA2/ETS2	2
BP	GO:0002097	tRNA wobble base modification	2/891	19/10468	0.489583	0.991216	0.991216	ALKBH8/NSUN3	2
BP	GO:0006490	oligosaccharide-lipid intermediate biosynthetic process	2/891	19/10468	0.489583	0.991216	0.991216	ALG9/DPAGT1	2
BP	GO:0006699	bile acid biosynthetic process	2/891	19/10468	0.489583	0.991216	0.991216	HSD3B7/AMACR	2
BP	GO:0006968	cellular defense response	2/891	19/10468	0.489583	0.991216	0.991216	BCL10/ITGB1	2
BP	GO:0007035	vacuolar acidification	2/891	19/10468	0.489583	0.991216	0.991216	DMXL1/ATP6V0E1	2
BP	GO:0009147	pyrimidine nucleoside triphosphate metabolic process	2/891	19/10468	0.489583	0.991216	0.991216	NME1/UCKL1	2
BP	GO:0009218	pyrimidine ribonucleotide metabolic process	2/891	19/10468	0.489583	0.991216	0.991216	NME1/UCKL1	2
BP	GO:0010800	positive regulation of peptidyl-threonine phosphorylation	2/891	19/10468	0.489583	0.991216	0.991216	CALM1/UBE2K	2
BP	GO:0010939	regulation of necrotic cell death	2/891	19/10468	0.489583	0.991216	0.991216	FADD/CASP8	2
BP	GO:0030857	negative regulation of epithelial cell differentiation	2/891	19/10468	0.489583	0.991216	0.991216	CCND1/HES1	2
BP	GO:0030947	regulation of vascular endothelial growth factor receptor signaling pathway	2/891	19/10468	0.489583	0.991216	0.991216	NEDD4/FGF18	2
BP	GO:0033028	myeloid cell apoptotic process	2/891	19/10468	0.489583	0.991216	0.991216	SLC7A11/IL6	2
BP	GO:0034377	plasma lipoprotein particle assembly	2/891	19/10468	0.489583	0.991216	0.991216	MTTP/BMP1	2
BP	GO:0034643	establishment of mitochondrion localization, microtubule-mediated	2/891	19/10468	0.489583	0.991216	0.991216	RHOT2/TRAK1	2
BP	GO:0035909	aorta morphogenesis	2/891	19/10468	0.489583	0.991216	0.991216	HES1/SEC24B	2
BP	GO:0036475	neuron death in response to oxidative stress	2/891	19/10468	0.489583	0.991216	0.991216	ATF4/SLC7A11	2
BP	GO:0045124	regulation of bone resorption	2/891	19/10468	0.489583	0.991216	0.991216	IL6/TMEM64	2
BP	GO:0046006	regulation of activated T cell proliferation	2/891	19/10468	0.489583	0.991216	0.991216	FADD/AGER	2
BP	GO:0046386	deoxyribose phosphate catabolic process	2/891	19/10468	0.489583	0.991216	0.991216	UNG/NUDT1	2
BP	GO:0047497	mitochondrion transport along microtubule	2/891	19/10468	0.489583	0.991216	0.991216	RHOT2/TRAK1	2
BP	GO:0051560	mitochondrial calcium ion homeostasis	2/891	19/10468	0.489583	0.991216	0.991216	MCU/AFG3L2	2
BP	GO:0055094	response to lipoprotein particle	2/891	19/10468	0.489583	0.991216	0.991216	ITGB1/ADTRP	2
BP	GO:0060042	retina morphogenesis in camera-type eye	2/891	19/10468	0.489583	0.991216	0.991216	FJX1/HIPK2	2
BP	GO:0060148	positive regulation of posttranscriptional gene silencing	2/891	19/10468	0.489583	0.991216	0.991216	AJUBA/ZFP36	2
BP	GO:0060706	cell differentiation involved in embryonic placenta development	2/891	19/10468	0.489583	0.991216	0.991216	CASP8/PRDM1	2
BP	GO:0070296	sarcoplasmic reticulum calcium ion transport	2/891	19/10468	0.489583	0.991216	0.991216	CALM1/SRI	2
BP	GO:0071459	protein localization to chromosome, centromeric region	2/891	19/10468	0.489583	0.991216	0.991216	CDT1/BOD1	2
BP	GO:0071542	dopaminergic neuron differentiation	2/891	19/10468	0.489583	0.991216	0.991216	FOXA2/MANF	2
BP	GO:0086004	regulation of cardiac muscle cell contraction	2/891	19/10468	0.489583	0.991216	0.991216	NOS1AP/SRI	2
BP	GO:1901984	negative regulation of protein acetylation	2/891	19/10468	0.489583	0.991216	0.991216	TAF7/SET	2
BP	GO:1903671	negative regulation of sprouting angiogenesis	2/891	19/10468	0.489583	0.991216	0.991216	SPRED1/PDCD10	2
BP	GO:0048813	dendrite morphogenesis	8/891	89/10468	0.490411	0.991216	0.991216	ITGB1/RAB21/NEDD4/ADAM10/MEF2A/CDK5R1/TRAK1/CUX1	8
BP	GO:0071322	cellular response to carbohydrate stimulus	8/891	89/10468	0.490411	0.991216	0.991216	MPC2/C2CD2L/NME1/FOXA2/TRA2B/AGER/FOXO3/SRI	8
BP	GO:0072522	purine-containing compound biosynthetic process	19/891	218/10468	0.492358	0.991216	0.991216	MPC2/HKDC1/NUP160/AAAS/ADPGK/PDPR/APRT/PDK2/NME1/SEH1L/ACSS2/SLC25A1/ADSL/SLC26A1/ACSL6/SLC35B3/OGDH/NUP205/SLC2A6	19
BP	GO:0002793	positive regulation of peptide secretion	12/891	136/10468	0.492542	0.991216	0.991216	CD58/MPC2/GLUL/MCU/C2CD2L/TGFB3/AGER/MAPK14/IL6/SRI/ACHE/JAK2	12
BP	GO:0050878	regulation of body fluid levels	24/891	277/10468	0.495258	0.991216	0.991216	CAPZA1/GBA/JMJD1C/HPS5/CCND1/PRCP/SOCS2/TYRO3/APRT/ARRB2/NME1/MYL12A/EHD2/GGCX/FOXA2/THBD/PRKAR2A/SLC7A11/ADTRP/IL6/YWHAZ/ZFPM2/JAK2/ATP7A	24
BP	GO:1901293	nucleoside phosphate biosynthetic process	24/891	277/10468	0.495258	0.991216	0.991216	MPC2/HKDC1/NUP160/AAAS/ADPGK/PDPR/APRT/PDK2/NME1/SEH1L/PNKP/RRM2/ACSS2/UCKL1/SLC25A1/ADSL/SLC26A1/ACSL6/SLC35B3/ME1/OGDH/NAMPT/NUP205/SLC2A6	24
BP	GO:1903321	negative regulation of protein modification by small protein conjugation or removal	6/891	66/10468	0.496086	0.991216	0.991216	IVNS1ABP/PRMT3/N4BP1/ARRB2/PINX1/UBR5	6
BP	GO:0006814	sodium ion transport	10/891	113/10468	0.497422	0.991216	0.991216	COMMD3/COMMD9/NEDD4/SLC24A1/NETO2/ACTN4/SPTBN4/SLC5A3/SLC9B1/SLC22A5	10
BP	GO:0030308	negative regulation of cell growth	10/891	113/10468	0.497422	0.991216	0.991216	SESN2/ST7L/BTG1/ESR2/CRLF3/CDK5R1/PHB/BCL6/JADE1/GDF9	10
BP	GO:0032392	DNA geometric change	10/891	113/10468	0.497422	0.991216	0.991216	GTF2H1/RAD51/CHD9/XRCC5/CDC45/WRNIP1/HNRNPA2B1/MTERF1/NBN/RECQL4	10
BP	GO:0005975	carbohydrate metabolic process	37/891	430/10468	0.498077	0.991216	0.991216	SESN2/LEPR/NPL/CSGALNACT2/HKDC1/EXT2/NUP160/AAAS/GNPTAB/FUT8/CALM1/ADPGK/MAN2C1/LCMT1/PHKB/PDK2/SEH1L/MIDN/B3GNT2/FOXA2/SLC5A3/SLC25A1/ATF4/XYLB/NISCH/IDUA/COQ2/GM2A/MAPK14/ME1/FUCA2/OGDH/NUP205/PPP1R3B/NCOA2/IDNK/SLC2A6	37
BP	GO:0009914	hormone transport	14/891	160/10468	0.498089	0.991216	0.991216	UBE2Q1/MPC2/GLUL/TACR2/MCU/CAMK2G/C2CD2L/MIDN/FOXA2/FOXL2/GDF9/IL6/SRI/JAK2	14
BP	GO:0030835	negative regulation of actin filament depolymerization	3/891	31/10468	0.498499	0.991216	0.991216	CAPZA1/SPTBN4/VILL	3
BP	GO:0032801	receptor catabolic process	3/891	31/10468	0.498499	0.991216	0.991216	NEDD4/AP2S1/MYLIP	3
BP	GO:0044273	sulfur compound catabolic process	3/891	31/10468	0.498499	0.991216	0.991216	AHCY/GGT7/IDUA	3
BP	GO:0045669	positive regulation of osteoblast differentiation	3/891	31/10468	0.498499	0.991216	0.991216	CEBPB/IL6/CEBPD	3
BP	GO:0045912	negative regulation of carbohydrate metabolic process	3/891	31/10468	0.498499	0.991216	0.991216	LEPR/MIDN/FOXA2	3
BP	GO:0051445	regulation of meiotic cell cycle	3/891	31/10468	0.498499	0.991216	0.991216	GPR3/YTHDC2/FBXO43	3
BP	GO:0072348	sulfur compound transport	3/891	31/10468	0.498499	0.991216	0.991216	SLC26A1/SLC7A11/SLC35B3	3
BP	GO:0097300	programmed necrotic cell death	3/891	31/10468	0.498499	0.991216	0.991216	FADD/CASP8/MAP3K5	3
BP	GO:1901030	positive regulation of mitochondrial outer membrane permeabilization involved in apoptotic signaling pathway	3/891	31/10468	0.498499	0.991216	0.991216	CASP8/BAK1/YWHAZ	3
BP	GO:1902475	L-alpha-amino acid transmembrane transport	3/891	31/10468	0.498499	0.991216	0.991216	SLC25A15/SLC25A38/SLC7A11	3
BP	GO:2000649	regulation of sodium ion transmembrane transporter activity	3/891	31/10468	0.498499	0.991216	0.991216	NEDD4/NETO2/ACTN4	3
BP	GO:0006405	RNA export from nucleus	11/891	125/10468	0.500367	0.991216	0.991216	SRRM1/NUP160/AAAS/SEH1L/U2AF1/POLDIP3/RBM15B/SDAD1/PHAX/HNRNPA2B1/NUP205	11
BP	GO:0043542	endothelial cell migration	11/891	125/10468	0.500367	0.991216	0.991216	RAB13/GLUL/ITGB1/PRCP/SPRED1/MAP2K3/PDCD10/FGF18/ADTRP/KRIT1/PAXIP1	11
BP	GO:2000058	regulation of ubiquitin-dependent protein catabolic process	11/891	125/10468	0.500367	0.991216	0.991216	GBA/MDM2/N4BP1/TLK2/TRIB2/RYBP/UBE2K/CSNK1A1/ANKIB1/HIPK2/TRIB1	11
BP	GO:0018212	peptidyl-tyrosine modification	19/891	219/10468	0.500687	0.991216	0.991216	TESK2/HAX1/TSG101/TYRO3/GPRC5B/MVP/ARRB2/MAP2K3/CHMP6/ZGPAT/PARP14/HES1/TXK/IL6/NCAPG2/CNOT7/JAK2/DLG3/RAP2C	19
BP	GO:0001568	blood vessel development	32/891	372/10468	0.502592	0.991216	0.991216	LEPR/WARS2/GLUL/ITGB1/PDE3B/PRCP/ARID2/MDM2/BTG1/TMED2/SPRED1/ALDH1A2/MFGE8/LTBP1/EPAS1/RUNX1/UBP1/TIPARP/PDCD10/HES1/SEC24B/FGF18/ADTRP/BAK1/MAPK14/PRDM1/IL6/KRIT1/HIPK2/PAXIP1/ZFPM2/ATP7A	32
BP	GO:0071417	cellular response to organonitrogen compound	32/891	372/10468	0.502592	0.991216	0.991216	SESN2/RRAGC/LEPROT/RAB13/EIF4EBP2/CPEB3/PDE3B/SIK2/RAP1B/MDM2/SOCS2/RAD51/APRT/CDC6/PDK2/CEBPB/ATF4/PRKAR2A/CPEB2/KLF3/AP3S1/ATP6V0E1/CPEB4/ATP6V1G2/AGER/UBR2/PHIP/FOXO3/NAMPT/JAK2/GKAP1/ATP7A	32
BP	GO:0007281	germ cell development	12/891	137/10468	0.503043	0.991216	0.991216	ATM/BRCA2/KMT2B/DMC1/MEI1/FOXL2/YTHDC2/GDF9/PRDM1/FOXO3/POMZP3/TTC26	12
BP	GO:0008306	associative learning	4/891	43/10468	0.503904	0.991216	0.991216	ITGB1/MEIS2/IFT20/SLC7A11	4
BP	GO:0031670	cellular response to nutrient	4/891	43/10468	0.503904	0.991216	0.991216	MDM2/PDK2/FOXA2/TRIM24	4
BP	GO:0035773	insulin secretion involved in cellular response to glucose stimulus	4/891	43/10468	0.503904	0.991216	0.991216	MPC2/C2CD2L/FOXA2/SRI	4
BP	GO:0042632	cholesterol homeostasis	4/891	43/10468	0.503904	0.991216	0.991216	COMMD9/NR1H2/MTTP/MYLIP	4
BP	GO:0043525	positive regulation of neuron apoptotic process	4/891	43/10468	0.503904	0.991216	0.991216	ATM/CDK5R1/ATF4/FOXO3	4
BP	GO:0051058	negative regulation of small GTPase mediated signal transduction	4/891	43/10468	0.503904	0.991216	0.991216	ITGB1/TNFAIP1/BCL6/SCAI	4
BP	GO:0061512	protein localization to cilium	4/891	43/10468	0.503904	0.991216	0.991216	EFCAB7/IFT20/BBS9/TTC26	4
BP	GO:0006367	transcription initiation from RNA polymerase II promoter	13/891	149/10468	0.5055	0.991216	0.991216	TEAD1/GTF2H1/CCND1/MAML2/ESR2/MED31/NR1H2/MAML3/TAF7/NR3C1/E2F3/PAXIP1/NR6A1	13
BP	GO:0006406	mRNA export from nucleus	9/891	102/10468	0.506295	0.991216	0.991216	SRRM1/NUP160/AAAS/SEH1L/U2AF1/POLDIP3/RBM15B/HNRNPA2B1/NUP205	9
BP	GO:0050731	positive regulation of peptidyl-tyrosine phosphorylation	9/891	102/10468	0.506295	0.991216	0.991216	HAX1/GPRC5B/ARRB2/PARP14/HES1/IL6/NCAPG2/JAK2/DLG3	9
BP	GO:0071222	cellular response to lipopolysaccharide	9/891	102/10468	0.506295	0.991216	0.991216	BCL10/SGMS1/ZFP36/NR1H2/CEBPB/MAPK14/IL6/TRIB1/LCN2	9
BP	GO:0071427	mRNA-containing ribonucleoprotein complex export from nucleus	9/891	102/10468	0.506295	0.991216	0.991216	SRRM1/NUP160/AAAS/SEH1L/U2AF1/POLDIP3/RBM15B/HNRNPA2B1/NUP205	9
BP	GO:0000302	response to reactive oxygen species	14/891	161/10468	0.507776	0.991216	0.991216	SESN2/ADPRHL2/MDM2/TPM1/PCGF2/PDK2/PDCD10/BAK1/FOXO3/MAP3K5/SOD2/IL6/LCN2/ATP7A	14
BP	GO:0021549	cerebellum development	5/891	55/10468	0.507878	0.991216	0.991216	GLI1/LHX5/CDK5R1/UQCRQ/ATP7A	5
BP	GO:0042254	ribosome biogenesis	23/891	267/10468	0.508346	0.991216	0.991216	MRTO4/RPS27/ISG20L2/RRNAD1/GLUL/NVL/HEATR1/DDX10/IMP3/PELP1/RPL26/MRPS7/WDR18/FBL/FAM207A/RPL3/NSUN3/SDAD1/GAR1/MRPL22/RPL7L1/NSUN5/RPL35	23
BP	GO:0001959	regulation of cytokine-mediated signaling pathway	10/891	114/10468	0.508918	0.991216	0.991216	FADD/NR1H2/CASP8/RUNX1/PARP14/UBE2K/TXK/IL6/CNOT7/JAK2	10
BP	GO:0040013	negative regulation of locomotion	15/891	173/10468	0.509901	0.991216	0.991216	NBL1/PTPRU/ARID2/SPRED1/TPM1/CLASP2/NISCH/PDCD10/ADTRP/FOXO3/CITED2/KRIT1/TRIB1/SCAI/RAP2C	15
BP	GO:0032675	regulation of interleukin-6 production	6/891	67/10468	0.511084	0.991216	0.991216	GBA/ARRB2/CEBPB/TLR9/AGER/IL6	6
BP	GO:0042795	snRNA transcription by RNA polymerase II	6/891	67/10468	0.511084	0.991216	0.991216	POU2F1/INTS7/SNAPC5/INTS12/ICE1/PHAX	6
BP	GO:1903313	positive regulation of mRNA metabolic process	6/891	67/10468	0.511084	0.991216	0.991216	CPEB3/TNRC6C/ZFP36/ZFP36L2/TRA2B/CNOT7	6
BP	GO:1903522	regulation of blood circulation	11/891	126/10468	0.5113	0.991216	0.991216	NOS1AP/MDM2/CALM1/TPM1/MEF2A/SPTBN4/EPAS1/AGER/SRI/TMEM65/JAK2	11
BP	GO:0010959	regulation of metal ion transport	17/891	197/10468	0.513779	0.991216	0.991216	NOS1AP/XCL1/CAMK2G/ISCU/CALM1/B2M/NEDD4/NETO2/ARRB2/ACTN4/SPTBN4/ATF4/TLR9/STC2/BAK1/SRI/ATP7A	17
BP	GO:0006400	tRNA modification	7/891	79/10468	0.51381	0.991216	0.991216	TRMT13/TRMT1L/ALKBH8/MTFMT/NSUN3/TRMT10A/METTL2B	7
BP	GO:1904375	regulation of protein localization to cell periphery	7/891	79/10468	0.51381	0.991216	0.991216	EFCAB7/ITGB1/STX3/GPC6/ADAM10/GOPC/STX7	7
BP	GO:0006954	inflammatory response	31/891	362/10468	0.513999	0.991216	0.991216	PTGER3/PSMB4/GBA/XCL1/CFH/ELF3/TLR5/SGMS1/PSMA1/PRCP/ATM/PNMA1/TYRO3/GPRC5B/SETD6/MAP2K3/PHB/SEH1L/IL18R1/AHCY/CEBPB/CCR4/TLR9/BCL6/MGST2/OSMR/AGER/MAPK14/IL6/NAMPT/JAK2	31
BP	GO:0006006	glucose metabolic process	13/891	150/10468	0.515519	0.991216	0.991216	SESN2/LEPR/ADPGK/LCMT1/PDK2/MIDN/FOXA2/SLC25A1/ATF4/NISCH/MAPK14/PPP1R3B/NCOA2	13
BP	GO:0002181	cytoplasmic translation	8/891	91/10468	0.516208	0.991216	0.991216	EIF2D/CPEB3/RPL41/RPL26/RPL13A/CPEB2/CPEB4/RPL30	8
BP	GO:1902904	negative regulation of supramolecular fiber organization	8/891	91/10468	0.516208	0.991216	0.991216	CAPZA1/CKAP2/SPTBN4/EML2/SPEF1/PICK1/CLASP2/VILL	8
BP	GO:0009150	purine ribonucleotide metabolic process	33/891	386/10468	0.516799	0.991216	0.991216	MAGI3/MPC2/HKDC1/FAR1/NUP160/SDHD/PTHLH/AAAS/NUDT4/ISCU/GPHN/ADPGK/HDDC3/SULT1A1/PDPR/APRT/PDK2/NME1/SEH1L/ACSS2/NDUFV3/SLC25A1/ADSL/SLC26A1/LOC344967/HINT1/ACSL6/UQCRQ/SLC35B3/OGDH/NUP205/SLC2A6/ATP7A	33
BP	GO:0000188	inactivation of MAPK activity	2/891	20/10468	0.517368	0.991216	0.991216	SPRED1/RGS3	2
BP	GO:0000470	maturation of LSU-rRNA	2/891	20/10468	0.517368	0.991216	0.991216	RPL7L1/RPL35	2
BP	GO:0002534	cytokine production involved in inflammatory response	2/891	20/10468	0.517368	0.991216	0.991216	SEH1L/MAPK14	2
BP	GO:0006309	apoptotic DNA fragmentation	2/891	20/10468	0.517368	0.991216	0.991216	FOXL2/IL6	2
BP	GO:0007339	binding of sperm to zona pellucida	2/891	20/10468	0.517368	0.991216	0.991216	CCT8/POMZP3	2
BP	GO:0008299	isoprenoid biosynthetic process	2/891	20/10468	0.517368	0.991216	0.991216	ALDH1A2/COQ2	2
BP	GO:0009164	nucleoside catabolic process	2/891	20/10468	0.517368	0.991216	0.991216	HDDC3/AHCY	2
BP	GO:0032594	protein transport within lipid bilayer	2/891	20/10468	0.517368	0.991216	0.991216	STX3/AP3D1	2
BP	GO:0034205	amyloid-beta formation	2/891	20/10468	0.517368	0.991216	0.991216	ADAM10/GGA3	2
BP	GO:0035094	response to nicotine	2/891	20/10468	0.517368	0.991216	0.991216	B2M/SLC7A11	2
BP	GO:0035272	exocrine system development	2/891	20/10468	0.517368	0.991216	0.991216	TGFB3/PLXNA1	2
BP	GO:0035315	hair cell differentiation	2/891	20/10468	0.517368	0.991216	0.991216	HES1/SEC24B	2
BP	GO:0035336	long-chain fatty-acyl-CoA metabolic process	2/891	20/10468	0.517368	0.991216	0.991216	FAR1/ACSL6	2
BP	GO:0043153	entrainment of circadian clock by photoperiod	2/891	20/10468	0.517368	0.991216	0.991216	ID2/BHLHE40	2
[truncated: 3,853 more rows]

## Sheet: SHS
ONTOLOGY	ID	Description	GeneRatio	BgRatio	pvalue	p.adjust	qvalue	geneID	Count
BP	GO:0046660	female sex differentiation	14/732	74/10468	0.000526523	0.96179	0.96179	ARID5B/BRCA2/TYRO3/ARRB2/KMT2B/CEBPB/NRIP1/DMC1/FOXL2/TIPARP/GDF9/BAK1/IMMP2L/ZFPM2	14
BP	GO:0008585	female gonad development	12/732	64/10468	0.00140417	0.96179	0.96179	ARID5B/BRCA2/ARRB2/KMT2B/CEBPB/NRIP1/DMC1/FOXL2/TIPARP/GDF9/IMMP2L/ZFPM2	12
BP	GO:0046545	development of primary female sexual characteristics	12/732	66/10468	0.00185131	0.96179	0.96179	ARID5B/BRCA2/ARRB2/KMT2B/CEBPB/NRIP1/DMC1/FOXL2/TIPARP/GDF9/IMMP2L/ZFPM2	12
BP	GO:0045598	regulation of fat cell differentiation	13/732	76/10468	0.0021609	0.96179	0.96179	SORT1/C1QL4/ID2/TRIB2/ZFP36L2/CEBPB/HES1/MAPK14/TAF8/IL6/CCDC71L/TMEM64/ZFPM2	13
BP	GO:0031016	pancreas development	8/732	35/10468	0.00238195	0.96179	0.96179	GDF11/ALDH1A2/FOXA2/NPHP3/HES1/BAK1/IL6/CDK6	8
BP	GO:0010225	response to UV-C	5/732	15/10468	0.00274349	0.96179	0.96179	MDM2/BRCA2/ERCC5/BAK1/MAP3K4	5
BP	GO:0007548	sex differentiation	21/732	161/10468	0.00407737	0.96179	0.96179	NASP/RAB13/NCOA4/ARID5B/CYP17A1/CCND1/BRCA2/TYRO3/ARRB2/KMT2B/CEBPB/NRIP1/DMC1/FOXL2/TIPARP/GDF9/BAK1/CITED2/NUDT1/IMMP2L/ZFPM2	21
BP	GO:0010039	response to iron ion	6/732	23/10468	0.00412902	0.96179	0.96179	CCND1/MDM2/B2M/CYBRD1/CPOX/ATP7A	6
BP	GO:0042770	signal transduction in response to DNA damage	16/732	111/10468	0.00434954	0.96179	0.96179	SESN2/DTL/KAT5/MDM2/BRCA2/SPRED1/RBL2/RPL26/ATAD5/EEF1E1/MAPK14/CNOT4/HIPK2/PAXIP1/CNOT7/NBN	16
BP	GO:0010212	response to ionizing radiation	17/732	122/10468	0.00476243	0.96179	0.96179	EYA3/INTS7/CYP2R1/KAT5/RAD9A/CCND1/MDM2/RAD9B/BRCA2/RPL26/THBD/BAK1/MAPK14/NAMPT/PAXIP1/MYC/SWI5	17
BP	GO:0006491	N-glycan processing	4/732	11/10468	0.00526016	0.96179	0.96179	MAN1A2/GNPTAB/FUT8/MAN1A1	4
BP	GO:0008406	gonad development	18/732	135/10468	0.00598064	0.96179	0.96179	NASP/RAB13/NCOA4/ARID5B/CCND1/BRCA2/ARRB2/KMT2B/CEBPB/NRIP1/DMC1/FOXL2/TIPARP/GDF9/CITED2/NUDT1/IMMP2L/ZFPM2	18
BP	GO:0000082	G1/S transition of mitotic cell cycle	25/732	211/10468	0.00653649	0.96179	0.96179	RCC1/NASP/ORC1/ITGB1/CCND1/CUL5/MDM2/RBL2/RPL26/CRLF3/CDC6/ID2/RRM2/BACH1/CDC45/JADE1/LSM11/CCND3/PRIM2/DBF4/CDK6/CNOT4/CUL1/CNOT7/MYC	25
BP	GO:0036507	protein demannosylation	5/732	18/10468	0.00656886	0.96179	0.96179	MAN1A2/EDEM3/OS9/EDEM1/MAN1A1	5
BP	GO:0036508	protein alpha-1,2-demannosylation	5/732	18/10468	0.00656886	0.96179	0.96179	MAN1A2/EDEM3/OS9/EDEM1/MAN1A1	5
BP	GO:0009314	response to radiation	34/732	313/10468	0.00674647	0.96179	0.96179	EYA3/DTL/INTS7/ITGB1/CYP2R1/KAT5/RAD9A/CCND1/MDM2/RAD9B/BRCA2/ERCC5/CALM1/NEDD4/SLC24A1/ERCC4/N4BP1/RBL2/RPL26/IFT20/PNKP/ID2/THBD/DYNLRB1/ATF4/BHLHE40/SLC7A11/BAK1/MAPK14/MAP3K4/NAMPT/PAXIP1/MYC/SWI5	34
BP	GO:0002720	positive regulation of cytokine production involved in immune response	7/732	33/10468	0.00683326	0.96179	0.96179	BCL10/XCL1/B2M/GPRC5B/IL18R1/MAPK14/IL6	7
BP	GO:0002702	positive regulation of production of molecular mediator of immune response	10/732	59/10468	0.00723986	0.96179	0.96179	BCL10/XCL1/B2M/GPRC5B/ATAD5/IL18R1/TLR9/MAPK14/IL6/PAXIP1	10
BP	GO:0044843	cell cycle G1/S phase transition	26/732	224/10468	0.00732501	0.96179	0.96179	RCC1/NASP/ORC1/ITGB1/CCND1/CUL5/GLI1/MDM2/RBL2/RPL26/CRLF3/CDC6/ID2/RRM2/BACH1/CDC45/JADE1/LSM11/CCND3/PRIM2/DBF4/CDK6/CNOT4/CUL1/CNOT7/MYC	26
BP	GO:0001916	positive regulation of T cell mediated cytotoxicity	4/732	12/10468	0.0074587	0.96179	0.96179	XCL1/FADD/B2M/STX7	4
BP	GO:0007175	negative regulation of epidermal growth factor-activated receptor activity	4/732	12/10468	0.0074587	0.96179	0.96179	ERRFI1/TSG101/CHMP6/ZGPAT	4
BP	GO:0045137	development of primary sexual characteristics	18/732	138/10468	0.00750462	0.96179	0.96179	NASP/RAB13/NCOA4/ARID5B/CCND1/BRCA2/ARRB2/KMT2B/CEBPB/NRIP1/DMC1/FOXL2/TIPARP/GDF9/CITED2/NUDT1/IMMP2L/ZFPM2	18
BP	GO:0008285	negative regulation of cell proliferation	40/732	386/10468	0.00772305	0.96179	0.96179	FBXO2/PTPRU/XCL1/CDKN1C/TSG101/C1QL4/GDF11/BTG1/BRCA2/KLF13/B2M/ALDH1A2/TPM1/MED31/CDC6/PHB/NME1/AXIN2/PDCD5/ID2/CEBPB/PLXNB1/IFT80/PDCD10/BCL6/HES1/NUDT6/EEF1E1/JARID2/E2F3/BAK1/SOD2/AIMP2/IL6/CDK6/PINX1/CNOT7/MYC/JAK2/DLG3	40
BP	GO:0006418	tRNA aminoacylation for protein translation	6/732	26/10468	0.00787156	0.96179	0.96179	WARS2/SARS2/MARS2/PPA2/EEF1E1/AIMP2	6
BP	GO:0006270	DNA replication initiation	7/732	34/10468	0.00809796	0.96179	0.96179	ORC1/CDC6/WDR18/CDC45/WRNIP1/PRIM2/NBN	7
BP	GO:0030330	DNA damage response, signal transduction by p53 class mediator	13/732	90/10468	0.009472	0.96179	0.96179	SESN2/KAT5/MDM2/BRCA2/SPRED1/RBL2/RPL26/EEF1E1/CNOT4/HIPK2/PAXIP1/CNOT7/NBN	13
BP	GO:0006336	DNA replication-independent nucleosome assembly	7/732	35/10468	0.00952697	0.96179	0.96179	NASP/ITGB3BP/OIP5/ASF1B/HJURP/HIRA/CENPC	7
BP	GO:0000083	regulation of transcription involved in G1/S transition of mitotic cell cycle	6/732	27/10468	0.00953539	0.96179	0.96179	ORC1/CDC6/ID2/RRM2/BACH1/CDC45	6
BP	GO:0044772	mitotic cell cycle phase transition	48/732	488/10468	0.009816	0.96179	0.96179	RCC1/NASP/ORC1/PSMB4/NEK2/DTL/ITGB1/CDKN1C/PSMA1/CCND1/CUL5/MDM2/PHLDA1/AJUBA/CCP110/LCMT1/RBL2/RPL26/CRLF3/ATAD5/PSMB3/PSMD3/CDC6/ID2/RRM2/ZFP36L2/ANAPC1/BACH1/CDC45/CLASP2/CEP70/HAUS3/ANAPC4/JADE1/LSM11/CCND3/PRIM2/DBF4/CDK6/CNOT4/CUL1/PINX1/CNOT7/PCM1/NBN/MYC/CDC26/PSMD5	48
BP	GO:0034390	smooth muscle cell apoptotic process	4/732	13/10468	0.010186	0.96179	0.96179	ARRB2/ATF4/E2F3/SOD2	4
BP	GO:0034391	regulation of smooth muscle cell apoptotic process	4/732	13/10468	0.010186	0.96179	0.96179	ARRB2/ATF4/E2F3/SOD2	4
BP	GO:0042559	pteridine-containing compound biosynthetic process	4/732	13/10468	0.010186	0.96179	0.96179	PCBD1/PTS/MTHFS/PCBD2	4
BP	GO:0034724	DNA replication-independent nucleosome organization	7/732	36/10468	0.0111318	0.96179	0.96179	NASP/ITGB3BP/OIP5/ASF1B/HJURP/HIRA/CENPC	7
BP	GO:0045599	negative regulation of fat cell differentiation	6/732	28/10468	0.0114354	0.96179	0.96179	SORT1/C1QL4/TRIB2/ZFP36L2/IL6/ZFPM2	6
BP	GO:0035270	endocrine system development	10/732	63/10468	0.0114613	0.96179	0.96179	ARID5B/CDKN1C/GLI1/ALDH1A2/FOXA2/HES1/BAK1/CITED2/IL6/CDK6	10
BP	GO:0006260	DNA replication	27/732	245/10468	0.0123392	0.96179	0.96179	NASP/ORC1/DTL/KAT5/RAD9A/GLI1/RAD9B/BRCA2/TNFAIP1/ATAD5/CDC6/KAT7/WDR18/PNKP/RRM2/CDC45/BCL6/POLN/PDS5A/WRNIP1/PRIM2/REV3L/DBF4/ACHE/NBN/SET/TTF1	27
BP	GO:0035735	intraciliary transport involved in cilium assembly	7/732	37/10468	0.0129237	0.96179	0.96179	IFT43/IFT20/DYNLRB1/IFT80/TTC26/PCM1/WDR34	7
BP	GO:0051149	positive regulation of muscle cell differentiation	9/732	55/10468	0.0132673	0.96179	0.96179	NEK5/BNIP2/MEF2A/CDH15/ARRB2/OLFM2/EHD2/MAPK14/SOD2	9
BP	GO:0003281	ventricular septum development	8/732	46/10468	0.0134058	0.96179	0.96179	MDM2/DAND5/ID2/LTBP1/HES1/PRDM1/CITED2/ZFPM2	8
BP	GO:0001914	regulation of T cell mediated cytotoxicity	4/732	14/10468	0.0134846	0.96179	0.96179	XCL1/FADD/B2M/STX7	4
BP	GO:0002726	positive regulation of T cell cytokine production	4/732	14/10468	0.0134846	0.96179	0.96179	XCL1/B2M/IL18R1/IL6	4
BP	GO:0006750	glutathione biosynthetic process	4/732	14/10468	0.0134846	0.96179	0.96179	CNDP2/GGT7/SLC7A11/MGST2	4
BP	GO:0031958	corticosteroid receptor signaling pathway	4/732	14/10468	0.0134846	0.96179	0.96179	NEDD4/PHB/NR3C1/JAK2	4
BP	GO:0042219	cellular modified amino acid catabolic process	4/732	14/10468	0.0134846	0.96179	0.96179	ALDH4A1/MTHFS/AHCY/GGT7	4
BP	GO:0002711	positive regulation of T cell mediated immunity	6/732	29/10468	0.0135876	0.96179	0.96179	XCL1/FADD/B2M/IL18R1/STX7/IL6	6
BP	GO:0043039	tRNA aminoacylation	6/732	29/10468	0.0135876	0.96179	0.96179	WARS2/SARS2/MARS2/PPA2/EEF1E1/AIMP2	6
BP	GO:0043687	post-translational protein modification	29/732	270/10468	0.0136007	0.96179	0.96179	FBXO2/FBXO44/PSMB4/RAB13/QSOX1/DTL/PSMA1/CUL5/ADAM10/MFGE8/ASB7/LCMT1/FBXL19/PSMB3/PSMD3/ASB16/RAB3A/LTBP1/TGOLN2/CRTAP/FBXL5/DCAF16/STC2/FUCA2/IL6/CUL1/COPS5/PSMD5/ASB6	29
BP	GO:0006323	DNA packaging	14/732	105/10468	0.0143311	0.96179	0.96179	NASP/ITGB3BP/OIP5/NUSAP1/ASF1B/HJURP/HIRA/SMC4/NCAPG/CENPC/SHPRH/GATAD1/NCAPG2/SET	14
BP	GO:0003231	cardiac ventricle development	11/732	75/10468	0.0146189	0.96179	0.96179	MDM2/TPM1/DAND5/ID2/LTBP1/TNNC1/HES1/PRDM1/CITED2/ZFPM2/TMEM65	11
BP	GO:0045646	regulation of erythrocyte differentiation	7/732	38/10468	0.0149138	0.96179	0.96179	KLF13/B2M/ID2/HSPA9/MAPK14/CDK6/NCAPG2	7
BP	GO:0006879	cellular iron ion homeostasis	8/732	47/10468	0.0151966	0.96179	0.96179	NCOA4/NUBP1/CYBRD1/FBXL5/SRI/CUL1/MYC/LCN2	8
BP	GO:0090068	positive regulation of cell cycle process	24/732	215/10468	0.0152703	0.96179	0.96179	SFPQ/DTL/CCND1/GLI1/MDM2/NUSAP1/RBL2/RPL26/SPAG5/CRLF3/ATAD5/CDK5R1/CDC6/ID2/CDC45/RANBP1/ANAPC4/LSM11/CCND3/PHIP/DBF4/CNOT4/CNOT7/CSPP1	24
BP	GO:0003279	cardiac septum development	10/732	66/10468	0.0156861	0.96179	0.96179	DHRS3/MDM2/DAND5/ID2/LTBP1/NPHP3/HES1/PRDM1/CITED2/ZFPM2	10
BP	GO:0045444	fat cell differentiation	17/732	138/10468	0.015778	0.96179	0.96179	SORT1/ARID5B/CCND1/C1QL4/ID2/TRIB2/ZFP36L2/CEBPB/HES1/MAPK14/TAF8/ARL4A/IL6/BBS9/CCDC71L/TMEM64/ZFPM2	17
BP	GO:0043038	amino acid activation	6/732	30/10468	0.0160073	0.96179	0.96179	WARS2/SARS2/MARS2/PPA2/EEF1E1/AIMP2	6
BP	GO:1900087	positive regulation of G1/S transition of mitotic cell cycle	6/732	30/10468	0.0160073	0.96179	0.96179	CCND1/MDM2/CDC6/CDC45/LSM11/CCND3	6
BP	GO:0021879	forebrain neuron differentiation	5/732	22/10468	0.0160082	0.96179	0.96179	LHX5/B2M/HES1/UQCRQ/ATP7A	5
BP	GO:1901532	regulation of hematopoietic progenitor cell differentiation	11/732	76/10468	0.016051	0.96179	0.96179	PSMB4/PSMA1/TCF12/PSMB3/PSMD3/RUNX1/HES1/FNIP1/HSPA9/CDK6/PSMD5	11
BP	GO:0061097	regulation of protein tyrosine kinase activity	9/732	57/10468	0.0165871	0.96179	0.96179	ERRFI1/TSG101/GPRC5B/MVP/CHMP6/ZGPAT/NCAPG2/DLG3/RAP2C	9
BP	GO:1902808	positive regulation of cell cycle G1/S phase transition	7/732	39/10468	0.0171128	0.96179	0.96179	CCND1/GLI1/MDM2/CDC6/CDC45/LSM11/CCND3	7
BP	GO:0002718	regulation of cytokine production involved in immune response	8/732	48/10468	0.0171545	0.96179	0.96179	BCL10/XCL1/B2M/GPRC5B/IL18R1/BCL6/MAPK14/IL6	8
BP	GO:0003205	cardiac chamber development	13/732	97/10468	0.0171959	0.96179	0.96179	DHRS3/MDM2/TPM1/DAND5/ID2/LTBP1/TNNC1/NPHP3/HES1/PRDM1/CITED2/ZFPM2/TMEM65	13
BP	GO:0006978	DNA damage response, signal transduction by p53 class mediator resulting in transcription of p21 class mediator	4/732	15/10468	0.0173904	0.96179	0.96179	KAT5/BRCA2/RPL26/HIPK2	4
BP	GO:0009994	oocyte differentiation	6/732	31/10468	0.018709	0.96179	0.96179	BRCA2/KMT2B/DMC1/FOXL2/YTHDC2/GDF9	6
BP	GO:1901987	regulation of cell cycle phase transition	38/732	385/10468	0.0191729	0.96179	0.96179	ORC1/PSMB4/NEK2/DTL/CDKN1C/PSMA1/CCND1/GLI1/MDM2/CCP110/LCMT1/RBL2/RPL26/ATAD5/PSMB3/PSMD3/CDC6/ID2/ZFP36L2/ANAPC1/CDC45/CEP70/HAUS3/ANAPC4/JADE1/LSM11/CCND3/DBF4/CDK6/CNOT4/CUL1/PAXIP1/PINX1/CNOT7/PCM1/NBN/CDC26/PSMD5	38
BP	GO:0042073	intraciliary transport	8/732	49/10468	0.0192875	0.96179	0.96179	IFT43/IFT20/DYNLRB1/IFT80/ICK/TTC26/PCM1/WDR34	8
BP	GO:0031018	endocrine pancreas development	5/732	23/10468	0.019308	0.96179	0.96179	FOXA2/HES1/BAK1/IL6/CDK6	5
BP	GO:0002262	myeloid cell homeostasis	15/732	120/10468	0.01993	0.96179	0.96179	KLF13/B2M/ID2/SLC25A38/BCL6/SLC7A11/HSPA9/BAK1/MAPK14/IL6/CDK6/HIPK2/NCAPG2/JAK2/PTBP3	15
BP	GO:0055072	iron ion homeostasis	9/732	59/10468	0.020477	0.96179	0.96179	NCOA4/B2M/NUBP1/CYBRD1/FBXL5/SRI/CUL1/MYC/LCN2	9
BP	GO:0009308	amine metabolic process	12/732	89/10468	0.020653	0.96179	0.96179	AZIN2/PSMB4/PSMA1/GDE1/SULT1A1/PSMB3/PSMD3/GDPD1/ODC1/SLC7A11/PSMD5/ATP7A	12
BP	GO:0000819	sister chromatid segregation	19/732	165/10468	0.0215259	0.96179	0.96179	SFPQ/NEK2/NUSAP1/LCMT1/SPAG5/CDC6/AXIN2/CHMP6/SEH1L/ANAPC1/HIRA/STAG1/SMC4/NCAPG/ANAPC4/PDS5A/CENPC/PINX1/CDC26	19
BP	GO:0000076	DNA replication checkpoint	4/732	16/10468	0.0219327	0.96179	0.96179	ORC1/RAD9A/CDC6/CDC45	4
BP	GO:0001832	blastocyst growth	4/732	16/10468	0.0219327	0.96179	0.96179	BRCA2/TAF8/NCAPG2/NBN	4
BP	GO:0006516	glycoprotein catabolic process	4/732	16/10468	0.0219327	0.96179	0.96179	FBXO2/FBXO44/EDEM3/EDEM1	4
BP	GO:0010661	positive regulation of muscle cell apoptotic process	4/732	16/10468	0.0219327	0.96179	0.96179	ATF4/E2F3/MAP3K5/SOD2	4
BP	GO:0019184	nonribosomal peptide biosynthetic process	4/732	16/10468	0.0219327	0.96179	0.96179	CNDP2/GGT7/SLC7A11/MGST2	4
BP	GO:0034035	purine ribonucleoside bisphosphate metabolic process	4/732	16/10468	0.0219327	0.96179	0.96179	HDDC3/SULT1A1/SLC26A1/SLC35B3	4
BP	GO:0034312	diol biosynthetic process	4/732	16/10468	0.0219327	0.96179	0.96179	GBA/PCBD1/PTS/PCBD2	4
BP	GO:0042772	DNA damage response, signal transduction resulting in transcription	4/732	16/10468	0.0219327	0.96179	0.96179	KAT5/BRCA2/RPL26/HIPK2	4
BP	GO:0006275	regulation of DNA replication	12/732	90/10468	0.0223732	0.96179	0.96179	GLI1/BRCA2/TNFAIP1/ATAD5/CDC6/WDR18/BCL6/PDS5A/WRNIP1/DBF4/NBN/TTF1	12
BP	GO:0002708	positive regulation of lymphocyte mediated immunity	9/732	60/10468	0.0226507	0.96179	0.96179	XCL1/FADD/B2M/ATAD5/IL18R1/STX7/ULBP2/IL6/PAXIP1	9
BP	GO:0006334	nucleosome assembly	9/732	60/10468	0.0226507	0.96179	0.96179	NASP/ITGB3BP/OIP5/ASF1B/HJURP/HIRA/CENPC/SHPRH/SET	9
BP	GO:0001912	positive regulation of leukocyte mediated cytotoxicity	5/732	24/10468	0.0230244	0.96179	0.96179	XCL1/FADD/B2M/STX7/ULBP2	5
BP	GO:0061099	negative regulation of protein tyrosine kinase activity	5/732	24/10468	0.0230244	0.96179	0.96179	ERRFI1/TSG101/MVP/CHMP6/ZGPAT	5
BP	GO:0009100	glycoprotein metabolic process	28/732	270/10468	0.0230717	0.96179	0.96179	FBXO2/FBXO44/MAN1A2/EDEM3/EXT2/DPAGT1/ALG10/OS9/PHLDA1/GNPTAB/FUT8/CHSY1/HS3ST3A1/MCFD2/B3GNT2/GALNT5/SDF2L1/EDEM1/PXYLP1/ST6GAL1/IDUA/TET2/EGFLAM/MGAT1/MAN1A1/DPY19L1/GOLGA2/ATP7A	28
BP	GO:0048608	reproductive structure development	27/732	259/10468	0.0238709	0.96179	0.96179	NASP/RAB13/NCOA4/ARID5B/CDKN1C/CCND1/GLI1/BRCA2/TYRO3/ARRB2/KMT2B/CEBPB/NRIP1/DMC1/FOXL2/TIPARP/HES1/GDF9/STC2/BAK1/MAPK14/PRDM1/CITED2/MAP3K4/NUDT1/IMMP2L/ZFPM2	27
BP	GO:2000736	regulation of stem cell differentiation	12/732	91/10468	0.0241969	0.96179	0.96179	PSMB4/PSMA1/PWP1/TCF12/PSMB3/PSMD3/ZFP36L2/RUNX1/HES1/HSPA9/CDK6/PSMD5	12
BP	GO:0001910	regulation of leukocyte mediated cytotoxicity	6/732	33/10468	0.0250112	0.96179	0.96179	XCL1/FADD/B2M/ARRB2/STX7/ULBP2	6
BP	GO:0051973	positive regulation of telomerase activity	6/732	33/10468	0.0250112	0.96179	0.96179	NEK2/NVL/PNKP/MAP3K4/HNRNPA2B1/MYC	6
BP	GO:0045930	negative regulation of mitotic cell cycle	27/732	261/10468	0.0260443	0.96179	0.96179	ORC1/PSMB4/PSMA1/RAD9A/CCND1/DDIAS/MDM2/BTG1/RAD9B/ZWILCH/LCMT1/RBL2/RPL26/PSMB3/PSMD3/CDC6/ZFP36L2/BCL6/JADE1/YTHDC2/CDK6/CNOT4/CUL1/PINX1/CNOT7/NBN/PSMD5	27
BP	GO:0043496	regulation of protein homodimerization activity	4/732	17/10468	0.0271338	0.96179	0.96179	STPG1/AIDA/PCBD1/BAK1	4
BP	GO:0044319	wound healing, spreading of cells	4/732	17/10468	0.0271338	0.96179	0.96179	AJUBA/CLASP2/PDCD10/TOR1A	4
BP	GO:0090505	epiboly involved in wound healing	4/732	17/10468	0.0271338	0.96179	0.96179	AJUBA/CLASP2/PDCD10/TOR1A	4
BP	GO:0070741	response to interleukin-6	5/732	25/10468	0.0271737	0.96179	0.96179	SELPLG/PHB/FOXA2/IL6/JAK2	5
BP	GO:0051188	cofactor biosynthetic process	27/732	262/10468	0.0271869	0.96179	0.96179	UROD/PCBD1/NUP160/PTS/AAAS/GPHN/PPCDC/MTHFS/PDPR/PDK2/RSAD1/SEH1L/CNDP2/GGT7/ACSS2/SLC25A1/SLC25A38/CPOX/COQ2/SLC7A11/MGST2/ACSL6/PCBD2/OGDH/NAMPT/NUP205/COQ4	27
BP	GO:0061458	reproductive system development	27/732	262/10468	0.0271869	0.96179	0.96179	NASP/RAB13/NCOA4/ARID5B/CDKN1C/CCND1/GLI1/BRCA2/TYRO3/ARRB2/KMT2B/CEBPB/NRIP1/DMC1/FOXL2/TIPARP/HES1/GDF9/STC2/BAK1/MAPK14/PRDM1/CITED2/MAP3K4/NUDT1/IMMP2L/ZFPM2	27
BP	GO:0140014	mitotic nuclear division	24/732	227/10468	0.0275244	0.96179	0.96179	RCC1/NEK2/CDKN1C/AAAS/NUSAP1/LCMT1/SPAG5/CDC6/CHMP6/SEH1L/ANAPC1/HIRA/RANBP1/CLASP2/STAG1/SMC4/NCAPG/ANAPC4/PDS5A/CENPC/PHIP/PINX1/CDC26/GOLGA2	24
BP	GO:0071391	cellular response to estrogen stimulus	3/732	10/10468	0.0281957	0.96179	0.96179	SFR1/MDM2/PELP1	3
BP	GO:1903894	regulation of IRE1-mediated unfolded protein response	3/732	10/10468	0.0281957	0.96179	0.96179	FICD/BAK1/COPS5	3
BP	GO:0002700	regulation of production of molecular mediator of immune response	11/732	83/10468	0.0291732	0.96179	0.96179	BCL10/XCL1/B2M/GPRC5B/ATAD5/IL18R1/TLR9/BCL6/MAPK14/IL6/PAXIP1	11
BP	GO:0034660	ncRNA metabolic process	44/732	473/10468	0.0309196	0.96179	0.96179	MRTO4/WARS2/RPS27/ISG20L2/RRNAD1/POU2F1/TRMT1L/INTS7/NVL/HEATR1/ALKBH8/DDX10/PWP1/FAM98B/MTFMT/SNAPC5/RPP25/IMP3/USB1/PELP1/RPL26/WDR18/SARS2/FBL/MARS2/FAM207A/ELP6/RPP14/NSUN3/TRMT10A/PPA2/INTS12/PHAX/RPP21/EEF1E1/TAF8/RPL7L1/GTF3C6/AIMP2/HNRNPA2B1/TYW1B/NSUN5/POLR1E/RPL35	44
BP	GO:0000070	mitotic sister chromatid segregation	16/732	138/10468	0.0312593	0.96179	0.96179	NEK2/NUSAP1/LCMT1/SPAG5/CDC6/CHMP6/SEH1L/ANAPC1/HIRA/SMC4/NCAPG/ANAPC4/PDS5A/CENPC/PINX1/CDC26	16
BP	GO:0002706	regulation of lymphocyte mediated immunity	11/732	84/10468	0.0315369	0.96179	0.96179	XCL1/FADD/B2M/ARRB2/ATAD5/IL18R1/BCL6/STX7/ULBP2/IL6/PAXIP1	11
BP	GO:0031341	regulation of cell killing	7/732	44/10468	0.0315822	0.96179	0.96179	XCL1/CFH/FADD/B2M/ARRB2/STX7/ULBP2	7
BP	GO:0051972	regulation of telomerase activity	7/732	44/10468	0.0315822	0.96179	0.96179	NEK2/NVL/PNKP/MAP3K4/HNRNPA2B1/PINX1/MYC	7
BP	GO:0001913	T cell mediated cytotoxicity	5/732	26/10468	0.0317695	0.96179	0.96179	XCL1/FADD/B2M/STX7/ULBP2	5
BP	GO:0006517	protein deglycosylation	5/732	26/10468	0.0317695	0.96179	0.96179	MAN1A2/EDEM3/OS9/EDEM1/MAN1A1	5
BP	GO:1904353	regulation of telomere capping	5/732	26/10468	0.0317695	0.96179	0.96179	NEK2/ERCC4/PNKP/MAP3K4/NBN	5
BP	GO:1901990	regulation of mitotic cell cycle phase transition	35/732	363/10468	0.0323657	0.96179	0.96179	ORC1/PSMB4/NEK2/DTL/CDKN1C/PSMA1/CCND1/MDM2/CCP110/LCMT1/RBL2/RPL26/ATAD5/PSMB3/PSMD3/CDC6/ID2/ZFP36L2/ANAPC1/CDC45/CEP70/HAUS3/ANAPC4/JADE1/LSM11/CCND3/CDK6/CNOT4/CUL1/PINX1/CNOT7/PCM1/NBN/CDC26/PSMD5	35
BP	GO:0031497	chromatin assembly	10/732	74/10468	0.0324854	0.96179	0.96179	NASP/ITGB3BP/OIP5/ASF1B/HJURP/HIRA/CENPC/SHPRH/GATAD1/SET	10
BP	GO:0046916	cellular transition metal ion homeostasis	10/732	74/10468	0.0324854	0.96179	0.96179	NCOA4/NUBP1/AP3D1/CYBRD1/FBXL5/SRI/CUL1/MYC/LCN2/ATP7A	10
BP	GO:0034311	diol metabolic process	4/732	18/10468	0.0330095	0.96179	0.96179	GBA/PCBD1/PTS/PCBD2	4
BP	GO:0046931	pore complex assembly	4/732	18/10468	0.0330095	0.96179	0.96179	AHCTF1/ADAM10/CCT8/NUP205	4
BP	GO:0090504	epiboly	4/732	18/10468	0.0330095	0.96179	0.96179	AJUBA/CLASP2/PDCD10/TOR1A	4
BP	GO:0044106	cellular amine metabolic process	11/732	85/10468	0.0340336	0.96179	0.96179	AZIN2/PSMB4/PSMA1/GDE1/PSMB3/PSMD3/GDPD1/ODC1/SLC7A11/PSMD5/ATP7A	11
BP	GO:0070125	mitochondrial translational elongation	11/732	85/10468	0.0340336	0.96179	0.96179	MRPS16/MRPL49/MRPS7/MRPL38/MRPL4/MRPS12/MRPS6/MRPS22/MRPL22/MRPS33/MRPS28	11
BP	GO:0010948	negative regulation of cell cycle process	28/732	280/10468	0.034871	0.96179	0.96179	ORC1/PSMB4/NEK2/DTL/PSMA1/CCND1/MDM2/NUBP1/LCMT1/RBL2/RPL26/PCGF2/PSMB3/PSMD3/CDC6/RRM2/ZFP36L2/RYBP/BCL6/JADE1/CBX3/CDK6/CNOT4/CUL1/PINX1/CNOT7/NBN/PSMD5	28
BP	GO:0030218	erythrocyte differentiation	12/732	96/10468	0.0349804	0.96179	0.96179	KLF13/B2M/ID2/SLC25A38/BCL6/HSPA9/MAPK14/CDK6/HIPK2/NCAPG2/JAK2/PTBP3	12
BP	GO:0010970	transport along microtubule	16/732	140/10468	0.0350889	0.96179	0.96179	SFPQ/ARHGAP21/RAB21/IFT43/RHOT2/IFT20/AP3D1/DYNLRB1/COPG1/TMEM108/IFT80/ICK/TTC26/PCM1/SYBU/WDR34	16
BP	GO:0099111	microtubule-based transport	16/732	140/10468	0.0350889	0.96179	0.96179	SFPQ/ARHGAP21/RAB21/IFT43/RHOT2/IFT20/AP3D1/DYNLRB1/COPG1/TMEM108/IFT80/ICK/TTC26/PCM1/SYBU/WDR34	16
BP	GO:0032922	circadian regulation of gene expression	7/732	45/10468	0.035231	0.96179	0.96179	RAI1/ID2/NRIP1/ATF4/BHLHE40/NAMPT/NCOA2	7
BP	GO:1902036	regulation of hematopoietic stem cell differentiation	9/732	65/10468	0.036028	0.96179	0.96179	PSMB4/PSMA1/TCF12/PSMB3/PSMD3/RUNX1/HSPA9/CDK6/PSMD5	9
BP	GO:0031146	SCF-dependent proteasomal ubiquitin-dependent protein catabolic process	11/732	86/10468	0.0366668	0.96179	0.96179	FBXO2/FBXO44/PSMB4/PSMA1/CUL5/AMN1/PSMB3/PSMD3/FBXL5/CUL1/PSMD5	11
BP	GO:0070126	mitochondrial translational termination	11/732	86/10468	0.0366668	0.96179	0.96179	MRPS16/MRPL49/MRPS7/MRPL38/MRPL4/MRPS12/MRPS6/MRPS22/MRPL22/MRPS33/MRPS28	11
BP	GO:0001682	tRNA 5'-leader removal	3/732	11/10468	0.0367966	0.96179	0.96179	RPP25/RPP14/RPP21	3
BP	GO:0035743	CD4-positive, alpha-beta T cell cytokine production	3/732	11/10468	0.0367966	0.96179	0.96179	XCL1/IL18R1/IL6	3
BP	GO:0042762	regulation of sulfur metabolic process	3/732	11/10468	0.0367966	0.96179	0.96179	PDPR/PDK2/SLC7A11	3
BP	GO:1904738	vascular associated smooth muscle cell migration	3/732	11/10468	0.0367966	0.96179	0.96179	MDM2/TPM1/ATP7A	3
BP	GO:1904752	regulation of vascular associated smooth muscle cell migration	3/732	11/10468	0.0367966	0.96179	0.96179	MDM2/TPM1/ATP7A	3
BP	GO:1905939	regulation of gonad development	3/732	11/10468	0.0367966	0.96179	0.96179	GDF9/CITED2/ZFPM2	3
BP	GO:0034080	CENP-A containing nucleosome assembly	5/732	27/10468	0.0368227	0.96179	0.96179	NASP/ITGB3BP/OIP5/HJURP/CENPC	5
BP	GO:0061641	CENP-A containing chromatin organization	5/732	27/10468	0.0368227	0.96179	0.96179	NASP/ITGB3BP/OIP5/HJURP/CENPC	5
BP	GO:2000272	negative regulation of signaling receptor activity	5/732	27/10468	0.0368227	0.96179	0.96179	ERRFI1/TSG101/ESR2/CHMP6/ZGPAT	5
BP	GO:0002027	regulation of heart rate	6/732	36/10468	0.0368804	0.96179	0.96179	NOS1AP/MDM2/CALM1/TPM1/SPTBN4/SRI	6
BP	GO:0035722	interleukin-12-mediated signaling pathway	6/732	36/10468	0.0368804	0.96179	0.96179	CAPZA1/RAP1B/HSPA9/SOD2/HNRNPA2B1/JAK2	6
BP	GO:0006333	chromatin assembly or disassembly	12/732	97/10468	0.0374911	0.96179	0.96179	NASP/ITGB3BP/SMARCC2/OIP5/ASF1B/TLK1/HJURP/HIRA/CENPC/SHPRH/GATAD1/SET	12
BP	GO:0006520	cellular amino acid metabolic process	25/732	247/10468	0.039281	0.96179	0.96179	ALDH4A1/AZIN2/WARS2/PSMB4/PCBD1/PSMA1/PTS/MTHFS/FAH/PSMB3/PSMD3/SARS2/ODC1/GAD1/MARS2/AHCY/ATF4/CRTAP/PPA2/SLC7A11/EEF1E1/AIMP2/OGDH/PSMD5/ATP7A	25
BP	GO:1902750	negative regulation of cell cycle G2/M phase transition	11/732	87/10468	0.0394395	0.96179	0.96179	ORC1/PSMB4/DTL/PSMA1/PSMB3/PSMD3/CDC6/CUL1/PINX1/NBN/PSMD5	11
BP	GO:0002724	regulation of T cell cytokine production	4/732	19/10468	0.0395691	0.96179	0.96179	XCL1/B2M/IL18R1/IL6	4
BP	GO:0007176	regulation of epidermal growth factor-activated receptor activity	4/732	19/10468	0.0395691	0.96179	0.96179	ERRFI1/TSG101/CHMP6/ZGPAT	4
BP	GO:0033598	mammary gland epithelial cell proliferation	4/732	19/10468	0.0395691	0.96179	0.96179	CCND1/BRCA2/ID2/CEBPB	4
BP	GO:0009416	response to light stimulus	22/732	212/10468	0.040348	0.96179	0.96179	DTL/ITGB1/CCND1/MDM2/BRCA2/ERCC5/CALM1/NEDD4/SLC24A1/ERCC4/N4BP1/RBL2/RPL26/IFT20/ID2/DYNLRB1/ATF4/BHLHE40/SLC7A11/BAK1/MAP3K4/MYC	22
BP	GO:0033044	regulation of chromosome organization	28/732	284/10468	0.0406965	0.96179	0.96179	SFPQ/NEK2/ERCC4/LCMT1/CDC6/KAT7/AXIN2/KMT2B/PNKP/ANAPC1/TLK1/CCT8/HIRA/CDC45/BCL6/ANAPC4/TAF7/JARID2/MAP3K4/HNRNPA2B1/PAXIP1/PINX1/NBN/UBR5/MYC/CDC26/PHF19/SET	28
BP	GO:0061061	muscle structure development	35/732	370/10468	0.0410431	0.96179	0.96179	SORT1/ZBTB18/ITGB1/ARID5B/SYNPO2L/BCL9L/GLI1/BTG1/NEK5/TCF12/BNIP2/TPM1/UNC45A/MEF2A/PRR14/CDH15/ARRB2/IFT20/AFG3L2/OLFM2/EID2/EHD2/FOXN2/HIRA/TNNC1/FOXL2/HES1/JARID2/MAPK14/PRICKLE4/MAP3K5/SOD2/SRI/ACHE/ZFPM2	35
BP	GO:0001541	ovarian follicle development	6/732	37/10468	0.0415172	0.96179	0.96179	ARRB2/KMT2B/CEBPB/DMC1/FOXL2/IMMP2L	6
BP	GO:0045747	positive regulation of Notch signaling pathway	6/732	37/10468	0.0415172	0.96179	0.96179	ELF3/TSPAN14/MAML2/PDCD10/HES1/MAML3	6
BP	GO:0071349	cellular response to interleukin-12	6/732	37/10468	0.0415172	0.96179	0.96179	CAPZA1/RAP1B/HSPA9/SOD2/HNRNPA2B1/JAK2	6
BP	GO:0006399	tRNA metabolic process	18/732	166/10468	0.0416867	0.96179	0.96179	WARS2/TRMT1L/ALKBH8/FAM98B/MTFMT/RPP25/SARS2/MARS2/ELP6/RPP14/NSUN3/TRMT10A/PPA2/RPP21/EEF1E1/GTF3C6/AIMP2/TYW1B	18
BP	GO:1903706	regulation of hemopoiesis	30/732	309/10468	0.0417251	0.96179	0.96179	PSMB4/HAX1/PSMA1/FADD/KLF13/B2M/TCF12/PSMB3/PSMD3/NME1/TNRC6C/AP3D1/KMT2B/ID2/ZFP36L2/CEBPB/RUNX1/TLR9/BCL6/HES1/FNIP1/HSPA9/MAPK14/PRDM1/CDK6/CNOT4/NCAPG2/TMEM64/MYC/PSMD5	30
BP	GO:0045787	positive regulation of cell cycle	28/732	285/10468	0.0422602	0.96179	0.96179	SFPQ/DTL/CCND1/GLI1/MDM2/BRCA2/NUSAP1/RBL2/RPL26/SPAG5/CRLF3/ATAD5/CDK5R1/CDC6/ID2/CDC45/RANBP1/HES1/ANAPC4/YTHDC2/LSM11/CCND3/PHIP/CITED2/DBF4/CNOT4/CNOT7/CSPP1	28
BP	GO:0048599	oocyte development	5/732	28/10468	0.0423416	0.96179	0.96179	BRCA2/DMC1/FOXL2/YTHDC2/GDF9	5
BP	GO:0034976	response to endoplasmic reticulum stress	24/732	237/10468	0.042562	0.96179	0.96179	FBXO2/FBXO44/SESN2/EDEM3/CCND1/OS9/FICD/JKAMP/WIPI1/CEBPB/HSPA13/USP25/SDF2L1/ATF4/EDEM1/MANF/SEC31A/TTC23L/STC2/BAK1/MAP3K5/HERPUD2/COPS5/TOR1A	24
BP	GO:0030705	cytoskeleton-dependent intracellular transport	17/732	155/10468	0.042769	0.96179	0.96179	SFPQ/ARHGAP21/RAB21/IFT43/RHOT2/IFT20/AP3D1/ACTN4/DYNLRB1/COPG1/TMEM108/IFT80/ICK/TTC26/PCM1/SYBU/WDR34	17
BP	GO:0045637	regulation of myeloid cell differentiation	17/732	155/10468	0.042769	0.96179	0.96179	HAX1/FADD/KLF13/B2M/NME1/TNRC6C/KMT2B/ID2/CEBPB/RUNX1/HSPA9/MAPK14/CDK6/CNOT4/NCAPG2/TMEM64/MYC	17
BP	GO:0030518	intracellular steroid hormone receptor signaling pathway	12/732	99/10468	0.0428888	0.96179	0.96179	NCOA4/KAT5/ESR2/NEDD4/ARRB2/PHB/NRIP1/RUNX1/TAF7/NR3C1/UBR5/JAK2	12
BP	GO:0051668	localization within membrane	12/732	99/10468	0.0428888	0.96179	0.96179	STX3/SEC23A/GPHN/ADAM10/AP3D1/PICK1/SEC31A/SEC24D/SLC7A11/STX7/DNM1/DLG3	12
BP	GO:0061077	chaperone-mediated protein folding	7/732	47/10468	0.0433399	0.96179	0.96179	UNC45A/PDCD5/HSPA13/CRTAP/HSPA9/TOR2A/TOR1A	7
BP	GO:0051301	cell division	43/732	472/10468	0.0436055	0.96179	0.96179	RCC1/ITGB3BP/JTB/NEK2/AHCTF1/ANXA11/TSG101/CCND1/BRCA2/CKAP2/NEK9/CALM1/OIP5/NUSAP1/ZWILCH/CCP110/RBL2/SPAG5/CDC6/CHMP6/SPIRE1/SEH1L/ZFP36L2/ANAPC1/CLASP2/STAG1/SMC4/HAUS3/NCAPG/ANAPC4/PDS5A/CENPC/KIF20A/NR3C1/CSNK1A1/CCND3/EFHC1/CDK6/NCAPG2/CSPP1/MYC/CDC26/GOLGA2	43
BP	GO:0071478	cellular response to radiation	16/732	144/10468	0.043755	0.96179	0.96179	INTS7/RAD9A/MDM2/RAD9B/CALM1/NEDD4/ERCC4/N4BP1/RBL2/RPL26/ATF4/BAK1/MAPK14/NAMPT/MYC/SWI5	16
BP	GO:0031503	protein-containing complex localization	24/732	238/10468	0.0443451	0.96179	0.96179	SRRM1/SFPQ/NUP160/STX3/AAAS/GPHN/IFT43/ADAM10/IFT20/SEH1L/AP3D1/DYNLRB1/RBM15B/IFT80/SDAD1/ICK/STX7/HNRNPA2B1/NUP205/TTC26/PCM1/DNM1/WDR34/DLG3	24
BP	GO:0010972	negative regulation of G2/M transition of mitotic cell cycle	10/732	78/10468	0.044441	0.96179	0.96179	ORC1/PSMB4/PSMA1/PSMB3/PSMD3/CDC6/CUL1/PINX1/NBN/PSMD5	10
BP	GO:0009411	response to UV	14/732	122/10468	0.0452754	0.96179	0.96179	DTL/CCND1/MDM2/BRCA2/ERCC5/NEDD4/ERCC4/N4BP1/RBL2/RPL26/ATF4/BAK1/MAP3K4/MYC	14
BP	GO:0051262	protein tetramerization	12/732	100/10468	0.0457806	0.96179	0.96179	RCC1/PCBD1/B2M/ALDH1A2/RRM2/ADSL/PCBD2/ME1/SOD2/ACHE/DECR1/GOLGA2	12
BP	GO:0043486	histone exchange	6/732	38/10468	0.0465053	0.96179	0.96179	NASP/ITGB3BP/VPS72/OIP5/HJURP/CENPC	6
BP	GO:0070671	response to interleukin-12	6/732	38/10468	0.0465053	0.96179	0.96179	CAPZA1/RAP1B/HSPA9/SOD2/HNRNPA2B1/JAK2	6
BP	GO:0001833	inner cell mass cell proliferation	3/732	12/10468	0.0465759	0.96179	0.96179	BRCA2/TAF8/NCAPG2	3
BP	GO:0009954	proximal/distal pattern formation	3/732	12/10468	0.0465759	0.96179	0.96179	GLI1/ALDH1A2/CHSY1	3
BP	GO:0030728	ovulation	3/732	12/10468	0.0465759	0.96179	0.96179	KMT2B/NRIP1/IMMP2L	3
BP	GO:0043248	proteasome assembly	3/732	12/10468	0.0465759	0.96179	0.96179	PSMG1/PSMG4/PSMD5	3
BP	GO:0043517	positive regulation of DNA damage response, signal transduction by p53 class mediator	3/732	12/10468	0.0465759	0.96179	0.96179	SPRED1/RPL26/EEF1E1	3
BP	GO:0045822	negative regulation of heart contraction	3/732	12/10468	0.0465759	0.96179	0.96179	SPTBN4/SRI/JAK2	3
BP	GO:0051645	Golgi localization	3/732	12/10468	0.0465759	0.96179	0.96179	ARHGAP21/COPG1/PDCD10	3
BP	GO:0001783	B cell apoptotic process	4/732	20/10468	0.046816	0.96179	0.96179	BCL10/BCL6/FNIP1/BAK1	4
BP	GO:0006312	mitotic recombination	4/732	20/10468	0.046816	0.96179	0.96179	BRCA2/TEP1/ERCC4/DMC1	4
BP	GO:0006851	mitochondrial calcium ion transmembrane transport	4/732	20/10468	0.046816	0.96179	0.96179	MCU/PHB/AFG3L2/PARL	4
BP	GO:1904037	positive regulation of epithelial cell apoptotic process	4/732	20/10468	0.046816	0.96179	0.96179	SORT1/ARRB2/IL6/JAK2	4
BP	GO:0033866	nucleoside bisphosphate biosynthetic process	8/732	58/10468	0.0474911	0.96179	0.96179	PPCDC/PDPR/PDK2/ACSS2/SLC25A1/SLC26A1/ACSL6/SLC35B3	8
BP	GO:0034030	ribonucleoside bisphosphate biosynthetic process	8/732	58/10468	0.0474911	0.96179	0.96179	PPCDC/PDPR/PDK2/ACSS2/SLC25A1/SLC26A1/ACSL6/SLC35B3	8
BP	GO:0034033	purine nucleoside bisphosphate biosynthetic process	8/732	58/10468	0.0474911	0.96179	0.96179	PPCDC/PDPR/PDK2/ACSS2/SLC25A1/SLC26A1/ACSL6/SLC35B3	8
BP	GO:0007059	chromosome segregation	26/732	264/10468	0.0477932	0.96179	0.96179	RCC1/SFPQ/NEK2/OIP5/NUSAP1/ERCC4/LCMT1/SPAG5/CDC6/AXIN2/CHMP6/SEH1L/ANAPC1/TLK1/HJURP/HIRA/DMC1/STAG1/SMC4/NCAPG/ANAPC4/PDS5A/CENPC/NR3C1/PINX1/CDC26	26
BP	GO:1901989	positive regulation of cell cycle phase transition	10/732	79/10468	0.0478413	0.96179	0.96179	DTL/CCND1/GLI1/MDM2/ATAD5/CDC6/CDC45/ANAPC4/LSM11/CCND3	10
BP	GO:0001503	ossification	22/732	216/10468	0.0479662	0.96179	0.96179	DHRS3/SORT1/EXT2/GLI1/CHSY1/PHB/AXIN2/FBL/ID2/TP53INP2/CEBPB/HIRA/PLXNB1/IGSF10/IFT80/MAPK14/IL6/CDK6/ACHE/BCAP29/BMP1/TMEM64	22
BP	GO:0002639	positive regulation of immunoglobulin production	5/732	29/10468	0.0483321	0.96179	0.96179	XCL1/ATAD5/TLR9/IL6/PAXIP1	5
BP	GO:0031055	chromatin remodeling at centromere	5/732	29/10468	0.0483321	0.96179	0.96179	NASP/ITGB3BP/OIP5/HJURP/CENPC	5
BP	GO:0031343	positive regulation of cell killing	5/732	29/10468	0.0483321	0.96179	0.96179	XCL1/FADD/B2M/STX7/ULBP2	5
BP	GO:0050805	negative regulation of synaptic transmission	5/732	29/10468	0.0483321	0.96179	0.96179	ASIC1/RAP1B/SLC24A1/PICK1/ACHE	5
BP	GO:0061462	protein localization to lysosome	5/732	29/10468	0.0483321	0.96179	0.96179	NCOA4/GNPTAB/NEDD4/GGA3/AP3D1	5
BP	GO:1904705	regulation of vascular smooth muscle cell proliferation	5/732	29/10468	0.0483321	0.96179	0.96179	MDM2/TPM1/MAP3K5/SOD2/JAK2	5
BP	GO:1990874	vascular smooth muscle cell proliferation	5/732	29/10468	0.0483321	0.96179	0.96179	MDM2/TPM1/MAP3K5/SOD2/JAK2	5
BP	GO:0034728	nucleosome organization	11/732	90/10468	0.0486235	0.96179	0.96179	NASP/ITGB3BP/VPS72/SMARCC2/OIP5/ASF1B/HJURP/HIRA/CENPC/SHPRH/SET	11
BP	GO:0055076	transition metal ion homeostasis	11/732	90/10468	0.0486235	0.96179	0.96179	NCOA4/B2M/NUBP1/AP3D1/CYBRD1/FBXL5/SRI/CUL1/MYC/LCN2/ATP7A	11
BP	GO:0036294	cellular response to decreased oxygen levels	17/732	158/10468	0.0497741	0.96179	0.96179	PSMB4/PSMA1/MDM2/AJUBA/PSMB3/PSMD3/BACH1/PICK1/ATF4/CPEB2/STC2/CITED2/NAMPT/HIPK2/MYC/PSMD5/ATP7A	17
BP	GO:0045786	negative regulation of cell cycle	44/732	490/10468	0.0506451	0.96179	0.96179	ORC1/PSMB4/NEK2/DTL/INTS7/CDKN1C/PSMA1/TSG101/RAD9A/CCND1/DDIAS/MDM2/BTG1/RAD9B/ZWILCH/NUBP1/LCMT1/RBL2/RPL26/CRLF3/CDK5R1/PCGF2/PSMB3/PSMD3/CDC6/ID2/RRM2/ZFP36L2/CDC45/RYBP/BCL6/NUDT6/JADE1/YTHDC2/MAPK14/CBX3/CDK6/CNOT4/CUL1/PINX1/CNOT7/NBN/MYC/PSMD5	44
BP	GO:0033673	negative regulation of kinase activity	19/732	182/10468	0.0513012	0.96179	0.96179	ERRFI1/GBA/AIDA/CDKN1C/SMPD1/TSG101/AJUBA/SPRED1/MVP/CHMP6/MIDN/AKT1S1/TRIB2/FOXA2/ZGPAT/PRKAR2A/TAF7/PRKRIP1/RGS3	19
BP	GO:0042035	regulation of cytokine biosynthetic process	8/732	59/10468	0.0517286	0.96179	0.96179	ERRFI1/BCL10/TRIB2/CEBPB/TLR9/LTB/IL6/JAK2	8
BP	GO:0002709	regulation of T cell mediated immunity	6/732	39/10468	0.0518494	0.96179	0.96179	XCL1/FADD/B2M/IL18R1/STX7/IL6	6
BP	GO:0060411	cardiac septum morphogenesis	6/732	39/10468	0.0518494	0.96179	0.96179	DHRS3/MDM2/ID2/HES1/CITED2/ZFPM2	6
BP	GO:0072666	establishment of protein localization to vacuole	6/732	39/10468	0.0518494	0.96179	0.96179	NCOA4/GNPTAB/VPS36/NEDD4/AP3D1/VPS37A	6
BP	GO:0034101	erythrocyte homeostasis	12/732	102/10468	0.0519619	0.96179	0.96179	KLF13/B2M/ID2/SLC25A38/BCL6/HSPA9/MAPK14/CDK6/HIPK2/NCAPG2/JAK2/PTBP3	12
BP	GO:0043618	regulation of transcription from RNA polymerase II promoter in response to stress	12/732	102/10468	0.0519619	0.96179	0.96179	SESN2/PSMB4/PSMA1/NEDD4/RBL2/PSMB3/PSMD3/CEBPB/BACH1/ATF4/CITED2/PSMD5	12
BP	GO:0098742	cell-cell adhesion via plasma-membrane adhesion molecules	11/732	91/10468	0.0519822	0.96179	0.96179	PTPRF/ITGB1/ROBO3/AJUBA/CDH15/LRFN3/FAT1/PCDHGA1/PCDHGA2/MAPK14/CRB2	11
BP	GO:0048477	oogenesis	7/732	49/10468	0.0525644	0.96179	0.96179	BRCA2/KMT2B/DMC1/FOXL2/YTHDC2/GDF9/POMZP3	7
BP	GO:0090398	cellular senescence	7/732	49/10468	0.0525644	0.96179	0.96179	B2M/ID2/BCL6/EEF1E1/MAPK14/CDK6/NAMPT	7
BP	GO:0001649	osteoblast differentiation	14/732	125/10468	0.0536556	0.96179	0.96179	GLI1/PHB/AXIN2/FBL/ID2/TP53INP2/CEBPB/HIRA/IFT80/IL6/CDK6/ACHE/BCAP29/TMEM64	14
BP	GO:0001510	RNA methylation	9/732	70/10468	0.0540122	0.96179	0.96179	RRNAD1/TRMT1L/ALKBH8/FBL/TRMT2A/RBM15B/NSUN3/TRMT10A/NSUN5	9
BP	GO:2001022	positive regulation of response to DNA damage stimulus	9/732	70/10468	0.0540122	0.96179	0.96179	EYA3/RAD9A/SPRED1/RPL26/SPIRE1/ANKLE1/EEF1E1/PAXIP1/MYC	9
BP	GO:1901988	negative regulation of cell cycle phase transition	21/732	207/10468	0.0542642	0.96179	0.96179	ORC1/PSMB4/DTL/PSMA1/CCND1/MDM2/LCMT1/RBL2/RPL26/PSMB3/PSMD3/CDC6/ZFP36L2/JADE1/CDK6/CNOT4/CUL1/PINX1/CNOT7/NBN/PSMD5	21
BP	GO:0097193	intrinsic apoptotic signaling pathway	22/732	219/10468	0.0543255	0.96179	0.96179	IFI6/SFPQ/IVNS1ABP/SGMS1/RAD9A/DDIAS/CUL5/MDM2/BRCA2/RPL26/ATAD5/PDK2/CEBPB/ATF4/PDCD10/BAK1/MAP3K5/SOD2/HIPK2/CUL1/NBN/JAK2	22
BP	GO:0006536	glutamate metabolic process	4/732	21/10468	0.0547476	0.96179	0.96179	ALDH4A1/MTHFS/GAD1/SLC7A11	4
BP	GO:0032757	positive regulation of interleukin-8 production	4/732	21/10468	0.0547476	0.96179	0.96179	BCL10/TLR5/FADD/TLR9	4
BP	GO:0043162	ubiquitin-dependent protein catabolic process via the multivesicular body sorting pathway	4/732	21/10468	0.0547476	0.96179	0.96179	TSG101/VPS36/NEDD4/VPS37A	4
BP	GO:0006576	cellular biogenic amine metabolic process	5/732	30/10468	0.054797	0.96179	0.96179	AZIN2/GDE1/GDPD1/ODC1/ATP7A	5
BP	GO:0021872	forebrain generation of neurons	5/732	30/10468	0.054797	0.96179	0.96179	LHX5/B2M/HES1/UQCRQ/ATP7A	5
BP	GO:0033865	nucleoside bisphosphate metabolic process	12/732	103/10468	0.0552553	0.96179	0.96179	FAR1/PPCDC/HDDC3/SULT1A1/PDPR/PDK2/ACSS2/SLC25A1/SLC26A1/ACSL6/SLC35B3/OGDH	12
BP	GO:0033875	ribonucleoside bisphosphate metabolic process	12/732	103/10468	0.0552553	0.96179	0.96179	FAR1/PPCDC/HDDC3/SULT1A1/PDPR/PDK2/ACSS2/SLC25A1/SLC26A1/ACSL6/SLC35B3/OGDH	12
BP	GO:0034032	purine nucleoside bisphosphate metabolic process	12/732	103/10468	0.0552553	0.96179	0.96179	FAR1/PPCDC/HDDC3/SULT1A1/PDPR/PDK2/ACSS2/SLC25A1/SLC26A1/ACSL6/SLC35B3/OGDH	12
BP	GO:0006614	SRP-dependent cotranslational protein targeting to membrane	11/732	92/10468	0.0554933	0.96179	0.96179	RPS27/RPL41/SRP14/RPL4/RPL26/RPL13A/RPS11/RPL3/BHLHE40-AS1/RPL30/RPL35	11
BP	GO:0071824	protein-DNA complex subunit organization	19/732	184/10468	0.0561276	0.96179	0.96179	NASP/ITGB3BP/VPS72/GTF2H1/SMARCC2/ERCC5/OIP5/ASF1B/HJURP/HIRA/CDC45/DMC1/CENPC/TAF7/SHPRH/MYC/POLR1E/SWI5/SET	19
BP	GO:0002367	cytokine production involved in immune response	8/732	60/10468	0.0562022	0.96179	0.96179	BCL10/XCL1/B2M/GPRC5B/IL18R1/BCL6/MAPK14/IL6	8
BP	GO:0071479	cellular response to ionizing radiation	8/732	60/10468	0.0562022	0.96179	0.96179	INTS7/RAD9A/MDM2/RAD9B/RPL26/MAPK14/NAMPT/SWI5	8
BP	GO:0032984	protein-containing complex disassembly	27/732	281/10468	0.0569985	0.96179	0.96179	CAPZA1/GBA/EIF2D/MRPS16/TSG101/MRPL49/SMARCC2/MAP1LC3B2/CKAP2/MAP1LC3B/MRPS7/MRPL38/EPG5/MRPL4/MRPS12/SPTBN4/SPEF1/MRPS6/CLASP2/VILL/MRPS22/CSNK1A1/MRPL22/MRPS33/MRPS28/MYC/SET	27
BP	GO:0000722	telomere maintenance via recombination	3/732	13/10468	0.0574928	0.96179	0.96179	BRCA2/TEP1/ERCC4	3
BP	GO:0001779	natural killer cell differentiation	3/732	13/10468	0.0574928	0.96179	0.96179	TYRO3/ID2/PRDM1	3
BP	GO:0007530	sex determination	3/732	13/10468	0.0574928	0.96179	0.96179	FOXL2/CITED2/MAP3K4	3
BP	GO:0042921	glucocorticoid receptor signaling pathway	3/732	13/10468	0.0574928	0.96179	0.96179	NEDD4/PHB/NR3C1	3
BP	GO:1902969	mitotic DNA replication	3/732	13/10468	0.0574928	0.96179	0.96179	BRCA2/CDC45/BCL6	3
BP	GO:2000406	positive regulation of T cell migration	3/732	13/10468	0.0574928	0.96179	0.96179	XCL1/FADD/ADAM10	3
BP	GO:0010660	regulation of muscle cell apoptotic process	6/732	40/10468	0.0575526	0.96179	0.96179	ARRB2/ATF4/E2F3/MAP3K5/SOD2/JAK2	6
BP	GO:0072676	lymphocyte migration	6/732	40/10468	0.0575526	0.96179	0.96179	ARTN/XCL1/FADD/ADAM10/HSD3B7/ADTRP	6
BP	GO:0002761	regulation of myeloid leukocyte differentiation	9/732	71/10468	0.0582023	0.96179	0.96179	HAX1/FADD/NME1/ID2/CEBPB/RUNX1/CDK6/TMEM64/MYC	9
BP	GO:1901991	negative regulation of mitotic cell cycle phase transition	20/732	197/10468	0.0588929	0.96179	0.96179	ORC1/PSMB4/PSMA1/CCND1/MDM2/LCMT1/RBL2/RPL26/PSMB3/PSMD3/CDC6/ZFP36L2/JADE1/CDK6/CNOT4/CUL1/PINX1/CNOT7/NBN/PSMD5	20
BP	GO:0007292	female gamete generation	10/732	82/10468	0.0590747	0.96179	0.96179	BRCA2/SPIRE1/KMT2B/NRIP1/DMC1/FOXL2/YTHDC2/GDF9/POMZP3/IMMP2L	10
BP	GO:0001889	liver development	11/732	93/10468	0.0591589	0.96179	0.96179	ARID5B/CCND1/GLI1/GNPNAT1/ALDH1A2/CEBPB/NPHP3/HES1/JARID2/CITED2/ATP7A	11
BP	GO:2000573	positive regulation of DNA biosynthetic process	8/732	61/10468	0.0609142	0.96179	0.96179	NEK2/NVL/ARRB2/PNKP/CCT8/MAP3K4/HNRNPA2B1/MYC	8
BP	GO:0098813	nuclear chromosome segregation	21/732	210/10468	0.0614127	0.96179	0.96179	SFPQ/NEK2/NUSAP1/ERCC4/LCMT1/SPAG5/CDC6/AXIN2/CHMP6/SEH1L/ANAPC1/HIRA/DMC1/STAG1/SMC4/NCAPG/ANAPC4/PDS5A/CENPC/PINX1/CDC26	21
BP	GO:2000772	regulation of cellular senescence	5/732	31/10468	0.061737	0.96179	0.96179	B2M/BCL6/EEF1E1/CDK6/NAMPT	5
BP	GO:0060218	hematopoietic stem cell differentiation	9/732	72/10468	0.062596	0.96179	0.96179	PSMB4/PSMA1/TCF12/PSMB3/PSMD3/RUNX1/HSPA9/CDK6/PSMD5	9
BP	GO:0072665	protein localization to vacuole	7/732	51/10468	0.0629336	0.96179	0.96179	NCOA4/GNPTAB/VPS36/NEDD4/GGA3/AP3D1/VPS37A	7
BP	GO:0044774	mitotic DNA integrity checkpoint	11/732	94/10468	0.0629807	0.96179	0.96179	ORC1/RAD9A/CCND1/MDM2/RAD9B/RBL2/RPL26/CDC6/CNOT4/CNOT7/NBN	11
BP	GO:0000910	cytokinesis	14/732	128/10468	0.0630436	0.96179	0.96179	JTB/AHCTF1/ANXA11/BRCA2/CKAP2/CALM1/NUSAP1/CCP110/CDC6/CHMP6/SPIRE1/KIF20A/EFHC1/CSPP1	14
BP	GO:0002699	positive regulation of immune effector process	14/732	128/10468	0.0630436	0.96179	0.96179	BCL10/XCL1/FADD/B2M/GPRC5B/ATAD5/PHB/IL18R1/TLR9/MAPK14/STX7/ULBP2/IL6/PAXIP1	14
BP	GO:0031167	rRNA methylation	4/732	22/10468	0.0633564	0.96179	0.96179	RRNAD1/FBL/NSUN3/NSUN5	4
BP	GO:0044839	cell cycle G2/M phase transition	23/732	235/10468	0.0633629	0.96179	0.96179	ORC1/PSMB4/NEK2/DTL/PSMA1/CCND1/PHLDA1/AJUBA/CCP110/LCMT1/ATAD5/PSMB3/PSMD3/CDC6/BACH1/CEP70/HAUS3/CUL1/PAXIP1/PINX1/PCM1/NBN/PSMD5	23
BP	GO:0034308	primary alcohol metabolic process	6/732	41/10468	0.0636168	0.96179	0.96179	DHRS3/ALDH1A2/GDE1/SULT1A1/GDPD1/ACSS2	6
BP	GO:1902749	regulation of cell cycle G2/M phase transition	19/732	187/10468	0.0639501	0.96179	0.96179	ORC1/PSMB4/NEK2/DTL/PSMA1/CCND1/CCP110/ATAD5/PSMB3/PSMD3/CDC6/CEP70/HAUS3/CUL1/PAXIP1/PINX1/PCM1/NBN/PSMD5	19
BP	GO:0031570	DNA integrity checkpoint	15/732	140/10468	0.0644474	0.96179	0.96179	ORC1/DTL/INTS7/RAD9A/CCND1/MDM2/RAD9B/RBL2/RPL26/CDC6/CDC45/MAPK14/CNOT4/CNOT7/NBN	15
BP	GO:0000280	nuclear division	29/732	310/10468	0.0658878	0.96179	0.96179	GPR3/RCC1/NEK2/CDKN1C/AAAS/BRCA2/NUSAP1/ERCC4/LCMT1/SPAG5/CDC6/CHMP6/SPIRE1/SEH1L/ANAPC1/HIRA/RANBP1/DMC1/CLASP2/STAG1/SMC4/NCAPG/ANAPC4/PDS5A/CENPC/PHIP/PINX1/CDC26/GOLGA2	29
BP	GO:0032543	mitochondrial translation	14/732	129/10468	0.0664033	0.96179	0.96179	WARS2/MRPS16/MRPL49/MRPS7/MRPL38/MRPL4/MRPS12/MRPS6/NSUN3/MRPS22/MRPL22/MRPS33/MRPS28/TRUB2	14
BP	GO:0050727	regulation of inflammatory response	19/732	188/10468	0.0667165	0.96179	0.96179	PTGER3/PSMB4/GBA/XCL1/CFH/PSMA1/TYRO3/GPRC5B/SETD6/PHB/CEBPB/TLR9/TBC1D23/BCL6/MGST2/OSMR/MAPK14/IL6/JAK2	19
BP	GO:0061008	hepaticobiliary system development	11/732	95/10468	0.0669603	0.96179	0.96179	ARID5B/CCND1/GLI1/GNPNAT1/ALDH1A2/CEBPB/NPHP3/HES1/JARID2/CITED2/ATP7A	11
BP	GO:0007498	mesoderm development	9/732	73/10468	0.0671952	0.96179	0.96179	ITGB1/EXT2/GDF11/DAND5/ETS2/CITED2/ZFPM2/JAK2/CRB2	9
BP	GO:0051101	regulation of DNA binding	10/732	84/10468	0.0674457	0.96179	0.96179	NEK2/ERCC4/NME1/ID2/HJURP/HES1/SRI/HIPK2/PINX1/JAK2	10
BP	GO:0002683	negative regulation of immune system process	24/732	249/10468	0.0676949	0.96179	0.96179	NBL1/BCL10/PSMB4/XCL1/PSMA1/LPXN/FADD/KLF13/TYRO3/ARRB2/NME1/NR1H2/ID2/CEBPB/RUNX1/TLR9/BCL6/HES1/HSPA9/ADTRP/CDK6/NCAPG2/CNOT7/MYC	24
BP	GO:0045931	positive regulation of mitotic cell cycle	13/732	118/10468	0.0682198	0.96179	0.96179	DTL/CCND1/MDM2/BRCA2/NUSAP1/CDC6/CDC45/RANBP1/HES1/ANAPC4/LSM11/CCND3/PHIP	13
BP	GO:0006521	regulation of cellular amino acid metabolic process	7/732	52/10468	0.0685527	0.96179	0.96179	PSMB4/PSMA1/PSMB3/PSMD3/ODC1/SLC7A11/PSMD5	7
BP	GO:0065004	protein-DNA complex assembly	16/732	153/10468	0.0686013	0.96179	0.96179	NASP/ITGB3BP/GTF2H1/ERCC5/OIP5/ASF1B/HJURP/HIRA/CDC45/DMC1/CENPC/TAF7/SHPRH/POLR1E/SWI5/SET	16
BP	GO:0007585	respiratory gaseous exchange	5/732	32/10468	0.0691502	0.96179	0.96179	MAN1A2/FUT8/RAB3A/SLC5A3/TNNC1	5
BP	GO:0031952	regulation of protein autophosphorylation	5/732	32/10468	0.0691502	0.96179	0.96179	ERRFI1/CALM1/MVP/NBN/RAP2C	5
BP	GO:2001020	regulation of response to DNA damage stimulus	17/732	165/10468	0.069177	0.96179	0.96179	EYA3/RAD9A/DDIAS/MDM2/SPRED1/ERCC4/RPL26/ATAD5/AXIN2/SPIRE1/ANKLE1/WRNIP1/EEF1E1/DEK/PAXIP1/UBR5/MYC	17
BP	GO:0002902	regulation of B cell apoptotic process	3/732	14/10468	0.0694951	0.96179	0.96179	BCL10/BCL6/FNIP1	3
BP	GO:0006047	UDP-N-acetylglucosamine metabolic process	3/732	14/10468	0.0694951	0.96179	0.96179	DPAGT1/GNPNAT1/MGAT1	3
BP	GO:0006999	nuclear pore organization	3/732	14/10468	0.0694951	0.96179	0.96179	AHCTF1/SEH1L/NUP205	3
BP	GO:0007628	adult walking behavior	3/732	14/10468	0.0694951	0.96179	0.96179	ARRB2/SPTBN4/HIPK2	3
BP	GO:0021983	pituitary gland development	3/732	14/10468	0.0694951	0.96179	0.96179	GLI1/ALDH1A2/HES1	3
BP	GO:0030325	adrenal gland development	3/732	14/10468	0.0694951	0.96179	0.96179	ARID5B/CDKN1C/CITED2	3
BP	GO:0085029	extracellular matrix assembly	3/732	14/10468	0.0694951	0.96179	0.96179	QSOX1/TNXB/ATP7A	3
BP	GO:0090110	cargo loading into COPII-coated vesicle	3/732	14/10468	0.0694951	0.96179	0.96179	SEC23A/SEC31A/SEC24D	3
BP	GO:2000403	positive regulation of lymphocyte migration	3/732	14/10468	0.0694951	0.96179	0.96179	XCL1/FADD/ADAM10	3
BP	GO:0033002	muscle cell proliferation	12/732	107/10468	0.0698207	0.96179	0.96179	GLI1/MDM2/TPM1/ID2/JARID2/MAPK14/MAP3K5/SOD2/IL6/NAMPT/ZFPM2/JAK2	12
BP	GO:0043620	regulation of DNA-templated transcription in response to stress	12/732	107/10468	0.0698207	0.96179	0.96179	SESN2/PSMB4/PSMA1/NEDD4/RBL2/PSMB3/PSMD3/CEBPB/BACH1/ATF4/CITED2/PSMD5	12
BP	GO:0034470	ncRNA processing	31/732	337/10468	0.0701774	0.96179	0.96179	MRTO4/RPS27/ISG20L2/RRNAD1/TRMT1L/INTS7/NVL/HEATR1/ALKBH8/DDX10/FAM98B/MTFMT/RPP25/IMP3/USB1/PELP1/RPL26/WDR18/FBL/FAM207A/ELP6/RPP14/NSUN3/TRMT10A/INTS12/RPP21/RPL7L1/HNRNPA2B1/TYW1B/NSUN5/RPL35	31
BP	GO:0002824	positive regulation of adaptive immune response based on somatic recombination of immune receptors built from immunoglobulin superfamily domains	8/732	63/10468	0.0710613	0.96179	0.96179	XCL1/FADD/B2M/ATAD5/IL18R1/STX7/IL6/PAXIP1	8
BP	GO:0042089	cytokine biosynthetic process	8/732	63/10468	0.0710613	0.96179	0.96179	ERRFI1/BCL10/TRIB2/CEBPB/TLR9/LTB/IL6/JAK2	8
BP	GO:0042107	cytokine metabolic process	8/732	63/10468	0.0710613	0.96179	0.96179	ERRFI1/BCL10/TRIB2/CEBPB/TLR9/LTB/IL6/JAK2	8
BP	GO:0006613	cotranslational protein targeting to membrane	11/732	96/10468	0.0710988	0.96179	0.96179	RPS27/RPL41/SRP14/RPL4/RPL26/RPL13A/RPS11/RPL3/BHLHE40-AS1/RPL30/RPL35	11
BP	GO:0030324	lung development	11/732	96/10468	0.0710988	0.96179	0.96179	ERRFI1/MAN1A2/GLI1/ALDH1A2/RAB3A/NPHP3/HES1/SLC7A11/AIMP2/ZFPM2/ATP7A	11
BP	GO:0140053	mitochondrial gene expression	16/732	154/10468	0.0718478	0.96179	0.96179	WARS2/MRPS16/MRPL49/MRPS7/MRPL38/MRPL4/MRPS12/MRPS6/NSUN3/MRPS22/TRMT10A/MRPL22/MTERF1/MRPS33/MRPS28/TRUB2	16
BP	GO:1903707	negative regulation of hemopoiesis	10/732	85/10468	0.0719006	0.96179	0.96179	KLF13/NME1/ID2/RUNX1/BCL6/HES1/HSPA9/CDK6/NCAPG2/MYC	10
BP	GO:0090090	negative regulation of canonical Wnt signaling pathway	13/732	119/10468	0.0719433	0.96179	0.96179	PTPRU/PSMB4/PSMA1/GLI1/PSMB3/PSMD3/AXIN2/NPHP3/JADE1/CSNK1A1/MAPK14/TMEM64/PSMD5	13
BP	GO:0034644	cellular response to UV	9/732	74/10468	0.0720011	0.96179	0.96179	MDM2/NEDD4/ERCC4/N4BP1/RBL2/RPL26/ATF4/BAK1/MYC	9
BP	GO:0010712	regulation of collagen metabolic process	4/732	23/10468	0.0726297	0.96179	0.96179	ERRFI1/ITGB1/ARRB2/IL6	4
BP	GO:0021575	hindbrain morphogenesis	4/732	23/10468	0.0726297	0.96179	0.96179	GLI1/LHX5/HES1/ATP7A	4
BP	GO:0051085	chaperone cofactor-dependent protein refolding	4/732	23/10468	0.0726297	0.96179	0.96179	HSPA13/HSPA9/TOR2A/TOR1A	4
BP	GO:0071354	cellular response to interleukin-6	4/732	23/10468	0.0726297	0.96179	0.96179	SELPLG/PHB/IL6/JAK2	4
BP	GO:0035966	response to topologically incorrect protein	17/732	167/10468	0.0755436	0.96179	0.96179	EDEM3/CCND1/FICD/JKAMP/WIPI1/HSPA13/SDF2L1/ATF4/EDEM1/MANF/SEC31A/HSPA9/STC2/BAK1/HERPUD2/COPS5/TOR1A	17
BP	GO:0002637	regulation of immunoglobulin production	6/732	43/10468	0.0768284	0.96179	0.96179	XCL1/ATAD5/TLR9/BCL6/IL6/PAXIP1	6
BP	GO:0010657	muscle cell apoptotic process	6/732	43/10468	0.0768284	0.96179	0.96179	ARRB2/ATF4/E2F3/MAP3K5/SOD2/JAK2	6
BP	GO:0001824	blastocyst development	9/732	75/10468	0.0770148	0.96179	0.96179	NASP/ELF3/NEK2/BRCA2/ASF1B/TAF8/RPL7L1/NCAPG2/NBN	9
BP	GO:0006623	protein targeting to vacuole	5/732	33/10468	0.0770321	0.96179	0.96179	NCOA4/GNPTAB/NEDD4/AP3D1/VPS37A	5
BP	GO:0032456	endocytic recycling	5/732	33/10468	0.0770321	0.96179	0.96179	RAB13/VPS53/GGA3/EPG5/EHD2	5
BP	GO:0097120	receptor localization to synapse	5/732	33/10468	0.0770321	0.96179	0.96179	STX3/GPHN/ADAM10/STX7/DLG3	5
BP	GO:0071453	cellular response to oxygen levels	17/732	168/10468	0.078868	0.96179	0.96179	PSMB4/PSMA1/MDM2/AJUBA/PSMB3/PSMD3/BACH1/PICK1/ATF4/CPEB2/STC2/CITED2/NAMPT/HIPK2/MYC/PSMD5/ATP7A	17
BP	GO:0006414	translational elongation	13/732	121/10468	0.0797807	0.96179	0.96179	MRPS16/MRPL49/MRPS7/MRPL38/MRPL4/MRPS12/MRPS6/MRPS22/CPEB2/MRPL22/MRPS33/MRPS28/SECISBP2	13
BP	GO:0071103	DNA conformation change	21/732	217/10468	0.0805814	0.96179	0.96179	NASP/ITGB3BP/GTF2H1/OIP5/NUSAP1/CHD9/ASF1B/HJURP/HIRA/CDC45/SMC4/NCAPG/CENPC/WRNIP1/SHPRH/HNRNPA2B1/MTERF1/GATAD1/NCAPG2/NBN/SET	21
BP	GO:0007610	behavior	28/732	304/10468	0.0810277	0.96179	0.96179	TRMT1L/ITGB1/TACR2/FADD/ASIC1/AAAS/MMP17/B2M/CFAP20/ARRB2/IFT20/OLFM2/KMT2B/SPTBN4/ID2/GAD1/FOXA2/AHCY/DYNLRB1/CEBPB/GNB1L/SLC7A11/GM2A/ATXN1/HIPK2/PCM1/NCOA2/ATP7A	28
BP	GO:0050730	regulation of peptidyl-tyrosine phosphorylation	15/732	145/10468	0.0817958	0.96179	0.96179	ERRFI1/HAX1/TSG101/GPRC5B/MVP/ARRB2/CHMP6/ZGPAT/HES1/IL6/NCAPG2/CNOT7/JAK2/DLG3/RAP2C	15
BP	GO:0070085	glycosylation	18/732	181/10468	0.0821316	0.96179	0.96179	MAN1A2/GBA/EDEM3/EXT2/DPAGT1/ALG10/FUT8/MCFD2/B3GNT2/GALNT5/SDF2L1/ST6GAL1/PIGZ/TET2/MGAT1/MAN1A1/DPY19L1/GOLGA2	18
BP	GO:0003206	cardiac chamber morphogenesis	8/732	65/10468	0.0821786	0.96179	0.96179	DHRS3/MDM2/TPM1/ID2/TNNC1/HES1/CITED2/ZFPM2	8
BP	GO:0032204	regulation of telomere maintenance	9/732	76/10468	0.0822367	0.96179	0.96179	NEK2/ERCC4/PNKP/CCT8/MAP3K4/HNRNPA2B1/PINX1/NBN/MYC	9
BP	GO:0002548	monocyte chemotaxis	3/732	15/10468	0.0825213	0.96179	0.96179	NBL1/XCL1/IL6	3
BP	GO:0007076	mitotic chromosome condensation	3/732	15/10468	0.0825213	0.96179	0.96179	NUSAP1/SMC4/NCAPG	3
BP	GO:0044060	regulation of endocrine process	3/732	15/10468	0.0825213	0.96179	0.96179	TACR2/FOXL2/GDF9	3
BP	GO:0048710	regulation of astrocyte differentiation	3/732	15/10468	0.0825213	0.96179	0.96179	ID2/HES1/IL6	3
BP	GO:0050427	3'-phosphoadenosine 5'-phosphosulfate metabolic process	3/732	15/10468	0.0825213	0.96179	0.96179	SULT1A1/SLC26A1/SLC35B3	3
BP	GO:0099116	tRNA 5'-end processing	3/732	15/10468	0.0825213	0.96179	0.96179	RPP25/RPP14/RPP21	3
BP	GO:2000773	negative regulation of cellular senescence	3/732	15/10468	0.0825213	0.96179	0.96179	BCL6/CDK6/NAMPT	3
BP	GO:0019730	antimicrobial humoral response	4/732	24/10468	0.0825507	0.96179	0.96179	LEAP2/RPL30/LCN2/ATP7A	4
BP	GO:0030261	chromosome condensation	4/732	24/10468	0.0825507	0.96179	0.96179	NUSAP1/SMC4/NCAPG/NCAPG2	4
BP	GO:0043516	regulation of DNA damage response, signal transduction by p53 class mediator	4/732	24/10468	0.0825507	0.96179	0.96179	MDM2/SPRED1/RPL26/EEF1E1	4
BP	GO:0050654	chondroitin sulfate proteoglycan metabolic process	4/732	24/10468	0.0825507	0.96179	0.96179	CHSY1/PXYLP1/IDUA/EGFLAM	4
BP	GO:0043414	macromolecule methylation	22/732	230/10468	0.0827302	0.96179	0.96179	RRNAD1/TRMT1L/PRMT3/ALKBH8/BTG1/PWP1/FAM98B/LCMT1/SETD6/KMT2B/FBL/TRMT2A/PICK1/RBM15B/NSUN3/TRMT10A/TET2/JARID2/NSUN5/PAXIP1/MYC/PHF19	22
BP	GO:0030099	myeloid cell differentiation	26/732	280/10468	0.0837556	0.96179	0.96179	HAX1/EFNA4/PIP4K2A/CDKN1C/FADD/KLF13/B2M/NME1/TNRC6C/KMT2B/ID2/CEBPB/RUNX1/SLC25A38/BCL6/TET2/HSPA9/MAPK14/CDK6/CNOT4/HIPK2/NCAPG2/TMEM64/MYC/JAK2/PTBP3	26
BP	GO:0043627	response to estrogen	6/732	44/10468	0.0839726	0.96179	0.96179	GBA/SFR1/CCND1/MDM2/PELP1/CITED2	6
BP	GO:0098609	cell-cell adhesion	35/732	394/10468	0.0841798	0.96179	0.96179	PTPRU/PTPRF/BCL10/XCL1/ITGB1/FADD/ROBO3/SELPLG/AJUBA/TYRO3/PIEZO1/CDH15/CDK5R1/MYL12A/AP3D1/PIP5K1C/LRFN3/FOXA2/CEBPB/RUNX1/GRAP2/BCL6/HES1/SLC7A11/FAT1/PCDHGA1/PCDHGA2/ADTRP/MAPK14/CITED2/IL6/JAK2/CRB2/EFNB1/DLG3	35
BP	GO:0006415	translational termination	11/732	99/10468	0.0844781	0.96179	0.96179	MRPS16/MRPL49/MRPS7/MRPL38/MRPL4/MRPS12/MRPS6/MRPS22/MRPL22/MRPS33/MRPS28	11
BP	GO:0030323	respiratory tube development	11/732	99/10468	0.0844781	0.96179	0.96179	ERRFI1/MAN1A2/GLI1/ALDH1A2/RAB3A/NPHP3/HES1/SLC7A11/AIMP2/ZFPM2/ATP7A	11
BP	GO:0022409	positive regulation of cell-cell adhesion	14/732	134/10468	0.0849747	0.96179	0.96179	PTPRU/BCL10/XCL1/FADD/PIEZO1/AP3D1/FOXA2/RUNX1/GRAP2/BCL6/HES1/CITED2/IL6/EFNB1	14
BP	GO:0008156	negative regulation of DNA replication	5/732	34/10468	0.0853764	0.96179	0.96179	BRCA2/CDC6/BCL6/PDS5A/TTF1	5
BP	GO:0022617	extracellular matrix disassembly	5/732	34/10468	0.0853764	0.96179	0.96179	ADAM10/MMP15/CLASP2/IL6/BMP1	5
BP	GO:1902882	regulation of response to oxidative stress	7/732	55/10468	0.087153	0.96179	0.96179	SESN2/SFPQ/FUT8/GGT7/ATF4/SLC7A11/SOD2	7
BP	GO:0002821	positive regulation of adaptive immune response	8/732	66/10468	0.0881012	0.96179	0.96179	XCL1/FADD/B2M/ATAD5/IL18R1/STX7/IL6/PAXIP1	8
BP	GO:0050671	positive regulation of lymphocyte proliferation	8/732	66/10468	0.0881012	0.96179	0.96179	XCL1/FADD/ATAD5/TLR9/BCL6/HES1/IL6/EFNB1	8
BP	GO:1901992	positive regulation of mitotic cell cycle phase transition	8/732	66/10468	0.0881012	0.96179	0.96179	DTL/CCND1/MDM2/CDC6/CDC45/ANAPC4/LSM11/CCND3	8
BP	GO:0035967	cellular response to topologically incorrect protein	14/732	135/10468	0.0890484	0.96179	0.96179	CCND1/FICD/WIPI1/HSPA13/SDF2L1/ATF4/EDEM1/SEC31A/HSPA9/STC2/BAK1/HERPUD2/COPS5/TOR1A	14
BP	GO:0006986	response to unfolded protein	15/732	147/10468	0.089505	0.96179	0.96179	EDEM3/CCND1/FICD/JKAMP/WIPI1/HSPA13/ATF4/EDEM1/MANF/SEC31A/HSPA9/STC2/BAK1/HERPUD2/COPS5	15
BP	GO:0000086	G2/M transition of mitotic cell cycle	21/732	220/10468	0.0899005	0.96179	0.96179	ORC1/PSMB4/NEK2/DTL/PSMA1/CCND1/PHLDA1/AJUBA/CCP110/LCMT1/PSMB3/PSMD3/CDC6/BACH1/CEP70/HAUS3/CUL1/PINX1/PCM1/NBN/PSMD5	21
BP	GO:0036503	ERAD pathway	10/732	89/10468	0.0915367	0.96179	0.96179	FBXO2/FBXO44/EDEM3/OS9/JKAMP/HSPA13/USP25/SDF2L1/EDEM1/TOR1A	10
BP	GO:0022411	cellular component disassembly	37/732	423/10468	0.0918956	0.96179	0.96179	CAPZA1/HAX1/GBA/EIF2D/MRPS16/TSG101/ATG2A/MRPL49/SMARCC2/MAP1LC3B2/CKAP2/NEK9/ADAM10/MMP15/MAP1LC3B/WIPI1/MRPS7/MRPL38/EPG5/MRPL4/MRPS12/SPTBN4/SPEF1/MRPS6/CLASP2/VILL/FOXL2/MRPS22/CSNK1A1/MRPL22/IL6/MRPS33/BMP1/MRPS28/MYC/GOLGA2/SET	37
BP	GO:0002369	T cell cytokine production	4/732	25/10468	0.0930988	0.96179	0.96179	XCL1/B2M/IL18R1/IL6	4
BP	GO:0002437	inflammatory response to antigenic stimulus	4/732	25/10468	0.0930988	0.96179	0.96179	PSMB4/PSMA1/PNMA1/AHCY	4
BP	GO:0006779	porphyrin-containing compound biosynthetic process	4/732	25/10468	0.0930988	0.96179	0.96179	UROD/RSAD1/SLC25A38/CPOX	4
BP	GO:0045737	positive regulation of cyclin-dependent protein serine/threonine kinase activity	4/732	25/10468	0.0930988	0.96179	0.96179	CCND1/CDK5R1/CDC6/CCND3	4
BP	GO:0048286	lung alveolus development	4/732	25/10468	0.0930988	0.96179	0.96179	ERRFI1/MAN1A2/SLC7A11/ATP7A	4
BP	GO:0060043	regulation of cardiac muscle cell proliferation	4/732	25/10468	0.0930988	0.96179	0.96179	GLI1/JARID2/MAPK14/ZFPM2	4
BP	GO:0009101	glycoprotein biosynthetic process	21/732	221/10468	0.0931571	0.96179	0.96179	MAN1A2/EDEM3/EXT2/DPAGT1/ALG10/PHLDA1/FUT8/CHSY1/HS3ST3A1/MCFD2/B3GNT2/GALNT5/SDF2L1/PXYLP1/ST6GAL1/TET2/MGAT1/MAN1A1/DPY19L1/GOLGA2/ATP7A	21
BP	GO:0030178	negative regulation of Wnt signaling pathway	14/732	136/10468	0.093243	0.96179	0.96179	PTPRU/PSMB4/PSMA1/GLI1/PSMB3/PSMD3/AXIN2/NPHP3/IFT80/JADE1/CSNK1A1/MAPK14/TMEM64/PSMD5	14
BP	GO:0002705	positive regulation of leukocyte mediated immunity	9/732	78/10468	0.0933051	0.96179	0.96179	XCL1/FADD/B2M/ATAD5/IL18R1/STX7/ULBP2/IL6/PAXIP1	9
BP	GO:0032259	methylation	25/732	271/10468	0.0937361	0.96179	0.96179	RRNAD1/TRMT1L/PRMT3/ALKBH8/BTG1/PWP1/FAM98B/LCMT1/SETD6/KMT2B/FBL/AHCY/TRMT2A/PICK1/RBM15B/NSUN3/TRMT10A/TET2/SETD9/JARID2/PRDM1/NSUN5/PAXIP1/MYC/PHF19	25
BP	GO:0008631	intrinsic apoptotic signaling pathway in response to oxidative stress	5/732	35/10468	0.0941743	0.96179	0.96179	SFPQ/PDCD10/MAP3K5/SOD2/JAK2	5
BP	GO:0032007	negative regulation of TOR signaling	5/732	35/10468	0.0941743	0.96179	0.96179	SESN2/SIK2/AKT1S1/FNIP1/EPM2A	5
BP	GO:0090342	regulation of cell aging	5/732	35/10468	0.0941743	0.96179	0.96179	B2M/BCL6/EEF1E1/CDK6/NAMPT	5
BP	GO:0032946	positive regulation of mononuclear cell proliferation	8/732	67/10468	0.0942653	0.96179	0.96179	XCL1/FADD/ATAD5/TLR9/BCL6/HES1/IL6/EFNB1	8
BP	GO:0050729	positive regulation of inflammatory response	8/732	67/10468	0.0942653	0.96179	0.96179	PTGER3/GPRC5B/CEBPB/TLR9/MGST2/OSMR/IL6/JAK2	8
BP	GO:0051348	negative regulation of transferase activity	20/732	209/10468	0.0942925	0.96179	0.96179	ERRFI1/GBA/AIDA/CDKN1C/SMPD1/TSG101/AJUBA/SPRED1/MVP/CHMP6/MIDN/AKT1S1/TRIB2/FOXA2/ZGPAT/PRKAR2A/TAF7/PRKRIP1/PINX1/RGS3	20
BP	GO:0002828	regulation of type 2 immune response	3/732	16/10468	0.0965032	0.96179	0.96179	XCL1/BCL6/IL6	3
BP	GO:0003230	cardiac atrium development	3/732	16/10468	0.0965032	0.96179	0.96179	MDM2/DAND5/NPHP3	3
BP	GO:0008210	estrogen metabolic process	3/732	16/10468	0.0965032	0.96179	0.96179	HSD17B7/SULT1A1/TIPARP	3
BP	GO:0021680	cerebellar Purkinje cell layer development	3/732	16/10468	0.0965032	0.96179	0.96179	LHX5/UQCRQ/ATP7A	3
BP	GO:0021696	cerebellar cortex morphogenesis	3/732	16/10468	0.0965032	0.96179	0.96179	GLI1/LHX5/ATP7A	3
BP	GO:0035024	negative regulation of Rho protein signal transduction	3/732	16/10468	0.0965032	0.96179	0.96179	ITGB1/TNFAIP1/BCL6	3
BP	GO:0040019	positive regulation of embryonic development	3/732	16/10468	0.0965032	0.96179	0.96179	FOXA2/CLASP2/HES1	3
BP	GO:0044331	cell-cell adhesion mediated by cadherin	3/732	16/10468	0.0965032	0.96179	0.96179	PTPRU/CDH15/FOXA2	3
BP	GO:0060045	positive regulation of cardiac muscle cell proliferation	3/732	16/10468	0.0965032	0.96179	0.96179	GLI1/MAPK14/ZFPM2	3
BP	GO:0090659	walking behavior	3/732	16/10468	0.0965032	0.96179	0.96179	ARRB2/SPTBN4/HIPK2	3
BP	GO:1903523	negative regulation of blood circulation	3/732	16/10468	0.0965032	0.96179	0.96179	SPTBN4/SRI/JAK2	3
BP	GO:2000737	negative regulation of stem cell differentiation	3/732	16/10468	0.0965032	0.96179	0.96179	ZFP36L2/HES1/HSPA9	3
BP	GO:0006261	DNA-dependent DNA replication	14/732	137/10468	0.0975587	0.96179	0.96179	ORC1/BRCA2/ATAD5/CDC6/WDR18/PNKP/CDC45/BCL6/POLN/WRNIP1/PRIM2/REV3L/DBF4/NBN	14
BP	GO:0071496	cellular response to external stimulus	22/732	235/10468	0.0984274	0.96179	0.96179	SESN2/BCL10/GBA/TLR5/FADD/SIK2/MDM2/MAP1LC3B2/MAP1LC3B/PIEZO1/PDK2/WIPI1/SEH1L/FOXA2/PICK1/ATF4/FNIP1/BAK1/MAP3K5/NUDT1/NAMPT/LCN2	22
BP	GO:0090329	regulation of DNA-dependent DNA replication	6/732	46/10468	0.0993197	0.96179	0.96179	BRCA2/WDR18/BCL6/WRNIP1/DBF4/NBN	6
BP	GO:0071158	positive regulation of cell cycle arrest	8/732	68/10468	0.100669	0.96179	0.96179	MDM2/RBL2/RPL26/CRLF3/CDK5R1/ID2/CNOT4/CNOT7	8
BP	GO:0010389	regulation of G2/M transition of mitotic cell cycle	17/732	174/10468	0.100821	0.96179	0.96179	ORC1/PSMB4/NEK2/DTL/PSMA1/CCND1/CCP110/PSMB3/PSMD3/CDC6/CEP70/HAUS3/CUL1/PINX1/PCM1/NBN/PSMD5	17
BP	GO:0036473	cell death in response to oxidative stress	7/732	57/10468	0.100993	0.96179	0.96179	SFPQ/ATF4/PDCD10/SLC7A11/MAP3K5/SOD2/JAK2	7
BP	GO:0070972	protein localization to endoplasmic reticulum	13/732	126/10468	0.101677	0.96179	0.96179	RPS27/RPL41/OS9/SRP14/RPL4/RPL26/RPL13A/RPS11/RPL3/BHLHE40-AS1/BCAP29/RPL30/RPL35	13
BP	GO:0071214	cellular response to abiotic stimulus	22/732	236/10468	0.101782	0.96179	0.96179	ERRFI1/BCL10/INTS7/TLR5/RAD9A/FADD/ASIC1/MDM2/RAD9B/CALM1/NEDD4/ERCC4/N4BP1/RBL2/PIEZO1/RPL26/ATF4/BAK1/MAPK14/NAMPT/MYC/SWI5	22
BP	GO:0104004	cellular response to environmental stimulus	22/732	236/10468	0.101782	0.96179	0.96179	ERRFI1/BCL10/INTS7/TLR5/RAD9A/FADD/ASIC1/MDM2/RAD9B/CALM1/NEDD4/ERCC4/N4BP1/RBL2/PIEZO1/RPL26/ATF4/BAK1/MAPK14/NAMPT/MYC/SWI5	22
BP	GO:0002763	positive regulation of myeloid leukocyte differentiation	5/732	36/10468	0.103415	0.96179	0.96179	HAX1/FADD/ID2/RUNX1/TMEM64	5
BP	GO:0042108	positive regulation of cytokine biosynthetic process	5/732	36/10468	0.103415	0.96179	0.96179	BCL10/TLR9/LTB/IL6/JAK2	5
BP	GO:0043388	positive regulation of DNA binding	5/732	36/10468	0.103415	0.96179	0.96179	NME1/HES1/HIPK2/PINX1/JAK2	5
BP	GO:0045600	positive regulation of fat cell differentiation	5/732	36/10468	0.103415	0.96179	0.96179	ID2/CEBPB/MAPK14/CCDC71L/TMEM64	5
BP	GO:0097064	ncRNA export from nucleus	5/732	36/10468	0.103415	0.96179	0.96179	NUP160/AAAS/SEH1L/PHAX/NUP205	5
BP	GO:0006040	amino sugar metabolic process	4/732	26/10468	0.10425	0.96179	0.96179	DPAGT1/GNPNAT1/ST6GAL1/MGAT1	4
BP	GO:0021536	diencephalon development	4/732	26/10468	0.10425	0.96179	0.96179	GLI1/ALDH1A2/HES1/UQCRQ	4
BP	GO:0035176	social behavior	4/732	26/10468	0.10425	0.96179	0.96179	GAD1/GNB1L/ATXN1/PCM1	4
BP	GO:0045668	negative regulation of osteoblast differentiation	4/732	26/10468	0.10425	0.96179	0.96179	AXIN2/ID2/CDK6/TMEM64	4
BP	GO:0046466	membrane lipid catabolic process	4/732	26/10468	0.10425	0.96179	0.96179	GBA/SMPD1/MGST2/GM2A	4
BP	GO:0051703	intraspecies interaction between organisms	4/732	26/10468	0.10425	0.96179	0.96179	GAD1/GNB1L/ATXN1/PCM1	4
BP	GO:0060412	ventricular septum morphogenesis	4/732	26/10468	0.10425	0.96179	0.96179	ID2/HES1/CITED2/ZFPM2	4
BP	GO:1904837	beta-catenin-TCF complex assembly	4/732	26/10468	0.10425	0.96179	0.96179	KAT5/BCL9L/AXIN2/MYC	4
BP	GO:2000401	regulation of lymphocyte migration	4/732	26/10468	0.10425	0.96179	0.96179	XCL1/FADD/ADAM10/ADTRP	4
BP	GO:0072329	monocarboxylic acid catabolic process	11/732	103/10468	0.10458	0.96179	0.96179	SESN2/FAH/LONP2/LPIN3/XYLB/IDUA/AMACR/ADTRP/DECR1/IDNK/SLC27A4	11
BP	GO:0002474	antigen processing and presentation of peptide antigen via MHC class I	9/732	80/10468	0.105202	0.96179	0.96179	PSMB4/PSMA1/SEC23A/B2M/PSMB3/PSMD3/SEC31A/SEC24D/PSMD5	9
BP	GO:0048738	cardiac muscle tissue development	12/732	115/10468	0.105845	0.96179	0.96179	ITGB1/GLI1/ALDH1A2/TPM1/MEF2A/ARRB2/IFT20/ID2/TNNC1/JARID2/MAPK14/ZFPM2	12
BP	GO:0002440	production of molecular mediator of immune response	13/732	127/10468	0.106452	0.96179	0.96179	BCL10/XCL1/B2M/GPRC5B/ATAD5/IL18R1/TLR9/BCL6/MAPK14/PMS2/IL6/PAXIP1/NBN	13
BP	GO:2000045	regulation of G1/S transition of mitotic cell cycle	13/732	127/10468	0.106452	0.96179	0.96179	CCND1/MDM2/RBL2/RPL26/CDC6/ID2/CDC45/JADE1/LSM11/CCND3/CDK6/CNOT4/CNOT7	13
BP	GO:1902806	regulation of cell cycle G1/S phase transition	14/732	139/10468	0.106553	0.96179	0.96179	CCND1/GLI1/MDM2/RBL2/RPL26/CDC6/ID2/CDC45/JADE1/LSM11/CCND3/CDK6/CNOT4/CNOT7	14
BP	GO:0070665	positive regulation of leukocyte proliferation	8/732	69/10468	0.107312	0.96179	0.96179	XCL1/FADD/ATAD5/TLR9/BCL6/HES1/IL6/EFNB1	8
BP	GO:1904356	regulation of telomere maintenance via telomere lengthening	7/732	58/10468	0.108336	0.96179	0.96179	NEK2/ERCC4/PNKP/CCT8/MAP3K4/HNRNPA2B1/PINX1	7
BP	GO:0048545	response to steroid hormone	22/732	238/10468	0.108708	0.96179	0.96179	ERRFI1/PTPRU/GBA/NCOA4/KAT5/CCND1/MDM2/ESR2/NEDD4/ARRB2/PHB/NR1H2/ZFP36L2/NRIP1/RUNX1/TAF7/NR3C1/ADTRP/IL6/NCOA2/UBR5/JAK2	22
BP	GO:0021700	developmental maturation	16/732	164/10468	0.109933	0.96179	0.96179	CDKN1C/GDF11/BRCA2/ALDH1A2/CDK5R1/AP3D1/RAB3A/SPTBN4/ID2/TRPC4AP/PICK1/DMC1/PLXNB1/HES1/SYBU/PTBP3	16
BP	GO:0045047	protein targeting to ER	11/732	104/10468	0.110008	0.96179	0.96179	RPS27/RPL41/SRP14/RPL4/RPL26/RPL13A/RPS11/RPL3/BHLHE40-AS1/RPL30/RPL35	11
BP	GO:0030522	intracellular receptor signaling pathway	19/732	201/10468	0.11022	0.96179	0.96179	DHRS3/NCOA4/KAT5/PRCP/ESR2/NEDD4/ALDH1A2/ARRB2/PHB/ACTN4/NR1H2/NRIP1/RUNX1/BRD8/TAF7/NR3C1/CITED2/UBR5/JAK2	19
BP	GO:0072331	signal transduction by p53 class mediator	21/732	226/10468	0.110577	0.96179	0.96179	SESN2/KAT5/RAD9A/MDM2/RAD9B/BRCA2/SPRED1/RBL2/RPL26/ATAD5/CDK5R1/PDK2/SETD9/TAF7/EEF1E1/MAPK14/CNOT4/HIPK2/PAXIP1/CNOT7/NBN	21
BP	GO:0034620	cellular response to unfolded protein	12/732	116/10468	0.111001	0.96179	0.96179	CCND1/FICD/WIPI1/HSPA13/ATF4/EDEM1/SEC31A/HSPA9/STC2/BAK1/HERPUD2/COPS5	12
BP	GO:0001822	kidney development	14/732	140/10468	0.111231	0.96179	0.96179	ARID5B/CDKN1C/NUP160/FADD/GDF11/MMP17/ALDH1A2/IFT20/ID2/ODC1/NPHP3/TIPARP/HES1/MYC	14
BP	GO:0044272	sulfur compound biosynthetic process	13/732	128/10468	0.111359	0.96179	0.96179	CHSY1/PDPR/PDK2/CNDP2/B3GNT2/GGT7/ACSS2/SLC25A1/SLC26A1/SLC7A11/MGST2/ACSL6/SLC35B3	13
BP	GO:0002675	positive regulation of acute inflammatory response	3/732	17/10468	0.111368	0.96179	0.96179	PTGER3/OSMR/IL6	3
BP	GO:0006953	acute-phase response	3/732	17/10468	0.111368	0.96179	0.96179	PTGER3/CEBPB/IL6	3
BP	GO:0009065	glutamine family amino acid catabolic process	3/732	17/10468	0.111368	0.96179	0.96179	ALDH4A1/FAH/GAD1	3
BP	GO:0010470	regulation of gastrulation	3/732	17/10468	0.111368	0.96179	0.96179	FOXA2/CLASP2/CRB2	3
BP	GO:0016254	preassembly of GPI anchor in ER membrane	3/732	17/10468	0.111368	0.96179	0.96179	PIGC/PIGZ/PIGY	3
BP	GO:0031954	positive regulation of protein autophosphorylation	3/732	17/10468	0.111368	0.96179	0.96179	CALM1/NBN/RAP2C	3
BP	GO:0034162	toll-like receptor 9 signaling pathway	3/732	17/10468	0.111368	0.96179	0.96179	UNC93B1/EPG5/TLR9	3
BP	GO:0048247	lymphocyte chemotaxis	3/732	17/10468	0.111368	0.96179	0.96179	XCL1/ADAM10/HSD3B7	3
BP	GO:0070229	negative regulation of lymphocyte apoptotic process	3/732	17/10468	0.111368	0.96179	0.96179	BCL10/FADD/BCL6	3
BP	GO:1900151	regulation of nuclear-transcribed mRNA catabolic process, deadenylation-dependent decay	3/732	17/10468	0.111368	0.96179	0.96179	TNRC6C/ZFP36L2/CNOT7	3
BP	GO:1900153	positive regulation of nuclear-transcribed mRNA catabolic process, deadenylation-dependent decay	3/732	17/10468	0.111368	0.96179	0.96179	TNRC6C/ZFP36L2/CNOT7	3
BP	GO:1904355	positive regulation of telomere capping	3/732	17/10468	0.111368	0.96179	0.96179	NEK2/PNKP/MAP3K4	3
BP	GO:0000956	nuclear-transcribed mRNA catabolic process	18/732	189/10468	0.111723	0.96179	0.96179	MRTO4/RPS27/PRPF18/RPL41/RPL4/RPL26/TNRC6C/RPL13A/RPS11/ZFP36L2/RPL3/TTC37/LSM5/CNOT4/CNOT7/RPL30/SECISBP2/RPL35	18
BP	GO:0034508	centromere complex assembly	5/732	37/10468	0.113087	0.96179	0.96179	NASP/ITGB3BP/OIP5/HJURP/CENPC	5
BP	GO:0042398	cellular modified amino acid biosynthetic process	5/732	37/10468	0.113087	0.96179	0.96179	MTHFS/CNDP2/GGT7/SLC7A11/MGST2	5
BP	GO:1904358	positive regulation of telomere maintenance via telomere lengthening	5/732	37/10468	0.113087	0.96179	0.96179	NEK2/PNKP/CCT8/MAP3K4/HNRNPA2B1	5
BP	GO:0043161	proteasome-mediated ubiquitin-dependent protein catabolic process	32/732	367/10468	0.114033	0.96179	0.96179	FBXO2/FBXO44/HECTD3/PSMB4/GBA/EDEM3/PSMA1/KAT5/CUL5/AMN1/OS9/MDM2/JKAMP/NEDD4/FBXL19/N4BP1/ARRB2/TNFAIP1/PSMB3/PSMD3/TRIB2/ANAPC1/HSPA13/EDEM1/RYBP/FBXL5/ANAPC4/CSNK1A1/UBE3D/CUL1/CDC26/PSMD5	32
BP	GO:0071482	cellular response to light stimulus	10/732	93/10468	0.114078	0.96179	0.96179	MDM2/CALM1/NEDD4/ERCC4/N4BP1/RBL2/RPL26/ATF4/BAK1/MYC	10
BP	GO:0001906	cell killing	8/732	70/10468	0.114189	0.96179	0.96179	XCL1/CFH/FADD/B2M/ARRB2/STX7/ULBP2/RPL30	8
BP	GO:0048863	stem cell differentiation	16/732	165/10468	0.11431	0.96179	0.96179	PSMB4/PSMA1/PWP1/TCF12/ALDH1A2/SETD6/PSMB3/PSMD3/ZFP36L2/RUNX1/HES1/HSPA9/JARID2/CDK6/PSMD5/EFNB1	16
BP	GO:0030968	endoplasmic reticulum unfolded protein response	11/732	105/10468	0.115596	0.96179	0.96179	CCND1/FICD/WIPI1/HSPA13/ATF4/EDEM1/SEC31A/STC2/BAK1/HERPUD2/COPS5	11
BP	GO:0051052	regulation of DNA metabolic process	29/732	329/10468	0.115842	0.96179	0.96179	EYA3/NEK2/NVL/GLI1/BRCA2/ERCC4/ARRB2/TNFAIP1/ATAD5/CDC6/AXIN2/SPIRE1/WDR18/PNKP/CCT8/BCL6/PDS5A/WRNIP1/DEK/MAP3K4/IL6/HNRNPA2B1/DBF4/PAXIP1/PINX1/NBN/UBR5/MYC/TTF1	29
BP	GO:0032963	collagen metabolic process	7/732	59/10468	0.115956	0.96179	0.96179	ERRFI1/ITGB1/MMP17/MMP15/ARRB2/TNXB/IL6	7
BP	GO:0043462	regulation of ATPase activity	7/732	59/10468	0.115956	0.96179	0.96179	TOR1AIP2/DNAJC1/TPM1/RAB3A/TLR9/TNNC1/TMEM64	7
BP	GO:0007632	visual behavior	4/732	27/10468	0.115976	0.96179	0.96179	ITGB1/IFT20/DYNLRB1/SLC7A11	4
BP	GO:0010524	positive regulation of calcium ion transport into cytosol	4/732	27/10468	0.115976	0.96179	0.96179	XCL1/CALM1/BAK1/SRI	4
BP	GO:0021695	cerebellar cortex development	4/732	27/10468	0.115976	0.96179	0.96179	GLI1/LHX5/UQCRQ/ATP7A	4
BP	GO:0042558	pteridine-containing compound metabolic process	4/732	27/10468	0.115976	0.96179	0.96179	PCBD1/PTS/MTHFS/PCBD2	4
BP	GO:0051084	'de novo' posttranslational protein folding	4/732	27/10468	0.115976	0.96179	0.96179	HSPA13/HSPA9/TOR2A/TOR1A	4
BP	GO:0055025	positive regulation of cardiac muscle tissue development	4/732	27/10468	0.115976	0.96179	0.96179	GLI1/ARRB2/MAPK14/ZFPM2	4
BP	GO:0032206	positive regulation of telomere maintenance	6/732	48/10468	0.116041	0.96179	0.96179	NEK2/PNKP/CCT8/MAP3K4/HNRNPA2B1/NBN	6
BP	GO:0043401	steroid hormone mediated signaling pathway	13/732	129/10468	0.116398	0.96179	0.96179	NCOA4/KAT5/ESR2/NEDD4/ARRB2/PHB/NR1H2/NRIP1/RUNX1/TAF7/NR3C1/UBR5/JAK2	13
BP	GO:0006903	vesicle targeting	9/732	82/10468	0.117916	0.96179	0.96179	SEC23A/GOSR1/WIPI1/MCFD2/CLASP2/TBC1D23/SEC31A/SEC24D/GOLGA2	9
BP	GO:0016072	rRNA metabolic process	21/732	228/10468	0.118078	0.96179	0.96179	MRTO4/RPS27/ISG20L2/RRNAD1/NVL/HEATR1/DDX10/PWP1/RPP25/IMP3/PELP1/RPL26/WDR18/FBL/FAM207A/NSUN3/RPL7L1/GTF3C6/NSUN5/POLR1E/RPL35	21
BP	GO:0045785	positive regulation of cell adhesion	20/732	216/10468	0.120205	0.96179	0.96179	PTPRU/BCL10/XCL1/STX3/FADD/TPM1/PIEZO1/AP3D1/FOXA2/RUNX1/GRAP2/BCL6/HES1/EGFLAM/CITED2/IL6/CDK6/JAK2/NINJ1/EFNB1	20
BP	GO:0015893	drug transport	11/732	106/10468	0.121342	0.96179	0.96179	TACR2/SLC25A15/AMN/SLC25A1/SLC25A38/SLC7A11/SLC22A5/GDF9/TAF7/MYC/TOR1A	11
BP	GO:0002381	immunoglobulin production involved in immunoglobulin mediated immune response	5/732	38/10468	0.123175	0.96179	0.96179	XCL1/ATAD5/BCL6/PAXIP1/NBN	5
BP	GO:0014855	striated muscle cell proliferation	5/732	38/10468	0.123175	0.96179	0.96179	GLI1/JARID2/MAPK14/ZFPM2/JAK2	5
BP	GO:0016233	telomere capping	5/732	38/10468	0.123175	0.96179	0.96179	NEK2/ERCC4/PNKP/MAP3K4/NBN	5
BP	GO:0043392	negative regulation of DNA binding	5/732	38/10468	0.123175	0.96179	0.96179	NEK2/ERCC4/ID2/SRI/JAK2	5
BP	GO:0045638	negative regulation of myeloid cell differentiation	6/732	49/10468	0.124898	0.96179	0.96179	KLF13/NME1/HSPA9/CDK6/NCAPG2/MYC	6
BP	GO:0048661	positive regulation of smooth muscle cell proliferation	6/732	49/10468	0.124898	0.96179	0.96179	MDM2/ID2/MAP3K5/IL6/NAMPT/JAK2	6
BP	GO:0009755	hormone-mediated signaling pathway	14/732	143/10468	0.125987	0.96179	0.96179	NCOA4/KAT5/PRCP/ESR2/NEDD4/ARRB2/PHB/NR1H2/NRIP1/RUNX1/TAF7/NR3C1/UBR5/JAK2	14
BP	GO:0030155	regulation of cell adhesion	32/732	371/10468	0.126137	0.96179	0.96179	PTPRU/BCL10/XCL1/PDE3B/LPXN/STX3/FADD/ADAM10/TPM1/PIEZO1/AP3D1/LRFN3/ACTN4/FOXA2/CEBPB/RUNX1/GRAP2/CLASP2/PLXNB1/PLXNA1/SERPINI1/BCL6/HES1/EGFLAM/ADTRP/MAPK14/CITED2/IL6/CDK6/JAK2/NINJ1/EFNB1	32
BP	GO:0051054	positive regulation of DNA metabolic process	17/732	180/10468	0.126244	0.96179	0.96179	EYA3/NEK2/NVL/GLI1/ARRB2/TNFAIP1/ATAD5/SPIRE1/PNKP/CCT8/MAP3K4/IL6/HNRNPA2B1/DBF4/PAXIP1/NBN/MYC	17
BP	GO:0001736	establishment of planar polarity	10/732	95/10468	0.126419	0.96179	0.96179	PSMB4/PSMA1/ARRB2/IFT20/PSMB3/PSMD3/AP2S1/NPHP3/PSMD5/DLG3	10
BP	GO:0007164	establishment of tissue polarity	10/732	95/10468	0.126419	0.96179	0.96179	PSMB4/PSMA1/ARRB2/IFT20/PSMB3/PSMD3/AP2S1/NPHP3/PSMD5/DLG3	10
BP	GO:0071695	anatomical structure maturation	10/732	95/10468	0.126419	0.96179	0.96179	CDKN1C/BRCA2/ALDH1A2/CDK5R1/SPTBN4/TRPC4AP/PICK1/DMC1/PLXNB1/PTBP3	10
BP	GO:0006622	protein targeting to lysosome	3/732	18/10468	0.12704	0.96179	0.96179	NCOA4/GNPTAB/NEDD4	3
BP	GO:0032986	protein-DNA complex disassembly	3/732	18/10468	0.12704	0.96179	0.96179	SMARCC2/MYC/SET	3
BP	GO:0034471	ncRNA 5'-end processing	3/732	18/10468	0.12704	0.96179	0.96179	RPP25/RPP14/RPP21	3
BP	GO:0035459	cargo loading into vesicle	3/732	18/10468	0.12704	0.96179	0.96179	SEC23A/SEC31A/SEC24D	3
BP	GO:0042092	type 2 immune response	3/732	18/10468	0.12704	0.96179	0.96179	XCL1/BCL6/IL6	3
BP	GO:0050829	defense response to Gram-negative bacterium	3/732	18/10468	0.12704	0.96179	0.96179	TLR9/IL6/RPL30	3
BP	GO:0060986	endocrine hormone secretion	3/732	18/10468	0.12704	0.96179	0.96179	TACR2/FOXL2/GDF9	3
BP	GO:0090344	negative regulation of cell aging	3/732	18/10468	0.12704	0.96179	0.96179	BCL6/CDK6/NAMPT	3
BP	GO:2000404	regulation of T cell migration	3/732	18/10468	0.12704	0.96179	0.96179	XCL1/FADD/ADAM10	3
BP	GO:0072599	establishment of protein localization to endoplasmic reticulum	11/732	107/10468	0.127246	0.96179	0.96179	RPS27/RPL41/SRP14/RPL4/RPL26/RPL13A/RPS11/RPL3/BHLHE40-AS1/RPL30/RPL35	11
BP	GO:0031111	negative regulation of microtubule polymerization or depolymerization	4/732	28/10468	0.128248	0.96179	0.96179	CKAP2/EML2/SPEF1/CLASP2	4
BP	GO:0032729	positive regulation of interferon-gamma production	4/732	28/10468	0.128248	0.96179	0.96179	FADD/IL18R1/TLR9/TXK	4
BP	GO:0033014	tetrapyrrole biosynthetic process	4/732	28/10468	0.128248	0.96179	0.96179	UROD/RSAD1/SLC25A38/CPOX	4
BP	GO:0042026	protein refolding	4/732	28/10468	0.128248	0.96179	0.96179	B2M/HSPA13/HSPA9/PDCL	4
BP	GO:1901658	glycosyl compound catabolic process	4/732	28/10468	0.128248	0.96179	0.96179	GBA/HDDC3/AHCY/FUCA2	4
BP	GO:1902229	regulation of intrinsic apoptotic signaling pathway in response to DNA damage	4/732	28/10468	0.128248	0.96179	0.96179	RAD9A/DDIAS/RPL26/ATAD5	4
BP	GO:1904031	positive regulation of cyclin-dependent protein kinase activity	4/732	28/10468	0.128248	0.96179	0.96179	CCND1/CDK5R1/CDC6/CCND3	4
BP	GO:0030902	hindbrain development	9/732	84/10468	0.131429	0.96179	0.96179	ITGB1/GLI1/LHX5/ALDH1A2/CDK5R1/PSMG1/HES1/UQCRQ/ATP7A	9
BP	GO:0033238	regulation of cellular amine metabolic process	7/732	61/10468	0.132006	0.96179	0.96179	PSMB4/PSMA1/PSMB3/PSMD3/ODC1/SLC7A11/PSMD5	7
BP	GO:0006469	negative regulation of protein kinase activity	16/732	169/10468	0.132843	0.96179	0.96179	ERRFI1/GBA/AIDA/CDKN1C/SMPD1/TSG101/SPRED1/MVP/CHMP6/AKT1S1/TRIB2/ZGPAT/PRKAR2A/TAF7/PRKRIP1/RGS3	16
BP	GO:0071383	cellular response to steroid hormone stimulus	16/732	169/10468	0.132843	0.96179	0.96179	ERRFI1/NCOA4/KAT5/ESR2/NEDD4/ARRB2/PHB/NR1H2/ZFP36L2/NRIP1/RUNX1/TAF7/NR3C1/ADTRP/UBR5/JAK2	16
BP	GO:2001056	positive regulation of cysteine-type endopeptidase activity	10/732	96/10468	0.132852	0.96179	0.96179	BCL10/FADD/NEK5/PDCD5/CASP10/FOXL2/BAK1/MAP3K5/MYC/JAK2	10
BP	GO:0007034	vacuolar transport	12/732	120/10468	0.133056	0.96179	0.96179	SORT1/NCOA4/TSG101/GNPTAB/VPS36/NEDD4/AKTIP/VPS53/CHMP6/EPG5/AP3D1/VPS37A	12
BP	GO:0030101	natural killer cell activation	5/732	39/10468	0.133664	0.96179	0.96179	TYRO3/ID2/IL18R1/PRDM1/ULBP2	5
BP	GO:0035019	somatic stem cell population maintenance	5/732	39/10468	0.133664	0.96179	0.96179	FOXD3/VPS72/BCL9L/ZFP36L2/HES1	5
BP	GO:0048008	platelet-derived growth factor receptor signaling pathway	5/732	39/10468	0.133664	0.96179	0.96179	LRIG2/ARID5B/IFT20/TIPARP/JAK2	5
BP	GO:0006029	proteoglycan metabolic process	6/732	50/10468	0.134074	0.96179	0.96179	EXT2/CHSY1/HS3ST3A1/PXYLP1/IDUA/EGFLAM	6
BP	GO:0021766	hippocampus development	6/732	50/10468	0.134074	0.96179	0.96179	LHX5/CDK5R1/NME1/TMEM108/UQCRQ/CDK6	6
BP	GO:1901880	negative regulation of protein depolymerization	6/732	50/10468	0.134074	0.96179	0.96179	CAPZA1/CKAP2/SPTBN4/SPEF1/CLASP2/VILL	6
BP	GO:0010498	proteasomal protein catabolic process	35/732	413/10468	0.135206	0.96179	0.96179	FBXO2/FBXO44/HECTD3/PSMB4/GBA/EDEM3/PSMA1/KAT5/CUL5/AMN1/OS9/MDM2/JKAMP/NEDD4/FBXL19/N4BP1/ARRB2/TNFAIP1/PSMB3/PSMD3/TRIB2/ANAPC1/HSPA13/USP25/SDF2L1/EDEM1/RYBP/FBXL5/ANAPC4/CSNK1A1/UBE3D/CUL1/CDC26/PSMD5/TOR1A	35
BP	GO:0042737	drug catabolic process	8/732	73/10468	0.136198	0.96179	0.96179	OXCT2/PCBD1/CYP2R1/MTHFS/FAH/SULT1A1/IDUA/ACHE	8
BP	GO:0031669	cellular response to nutrient levels	16/732	170/10468	0.13773	0.96179	0.96179	SESN2/GBA/SIK2/MDM2/MAP1LC3B2/MAP1LC3B/PDK2/WIPI1/SEH1L/FOXA2/PICK1/ATF4/FNIP1/MAP3K5/NAMPT/LCN2	16
BP	GO:0044773	mitotic DNA damage checkpoint	9/732	85/10468	0.138479	0.96179	0.96179	RAD9A/CCND1/MDM2/RAD9B/RBL2/RPL26/CNOT4/CNOT7/NBN	9
BP	GO:0071156	regulation of cell cycle arrest	9/732	85/10468	0.138479	0.96179	0.96179	CCND1/MDM2/RBL2/RPL26/CRLF3/CDK5R1/ID2/CNOT4/CNOT7	9
BP	GO:1905037	autophagosome organization	9/732	85/10468	0.138479	0.96179	0.96179	GBA/PIP4K2A/ATG2A/MAP1LC3B2/MAP1LC3B/IFT20/WIPI1/ATG16L1/TP53INP2	9
BP	GO:0048872	homeostasis of number of cells	17/732	183/10468	0.140245	0.96179	0.96179	BCL10/FADD/KLF13/B2M/ID2/SLC25A38/BCL6/SLC7A11/HSPA9/BAK1/MAPK14/IL6/CDK6/HIPK2/NCAPG2/JAK2/PTBP3	17
BP	GO:1900182	positive regulation of protein localization to nucleus	7/732	62/10468	0.140424	0.96179	0.96179	SESN2/EFCAB7/KAT7/CCT8/MAPK14/PINX1/UBR5	7
BP	GO:0008608	attachment of spindle microtubules to kinetochore	4/732	29/10468	0.141035	0.96179	0.96179	NEK2/SPAG5/SEH1L/CENPC	4
BP	GO:0014910	regulation of smooth muscle cell migration	4/732	29/10468	0.141035	0.96179	0.96179	MDM2/TPM1/PLXNA1/ATP7A	4
BP	GO:0045740	positive regulation of DNA replication	4/732	29/10468	0.141035	0.96179	0.96179	GLI1/TNFAIP1/ATAD5/DBF4	4
BP	GO:0071674	mononuclear cell migration	4/732	29/10468	0.141035	0.96179	0.96179	NBL1/XCL1/MAPK14/IL6	4
BP	GO:0072001	renal system development	14/732	146/10468	0.141807	0.96179	0.96179	ARID5B/CDKN1C/NUP160/FADD/GDF11/MMP17/ALDH1A2/IFT20/ID2/ODC1/NPHP3/TIPARP/HES1/MYC	14
BP	GO:0006364	rRNA processing	18/732	196/10468	0.142345	0.96179	0.96179	MRTO4/RPS27/ISG20L2/RRNAD1/NVL/HEATR1/DDX10/RPP25/IMP3/PELP1/RPL26/WDR18/FBL/FAM207A/NSUN3/RPL7L1/NSUN5/RPL35	18
BP	GO:0006486	protein glycosylation	16/732	171/10468	0.142718	0.96179	0.96179	MAN1A2/EDEM3/EXT2/DPAGT1/ALG10/FUT8/MCFD2/B3GNT2/GALNT5/SDF2L1/ST6GAL1/TET2/MGAT1/MAN1A1/DPY19L1/GOLGA2	16
BP	GO:0043413	macromolecule glycosylation	16/732	171/10468	0.142718	0.96179	0.96179	MAN1A2/EDEM3/EXT2/DPAGT1/ALG10/FUT8/MCFD2/B3GNT2/GALNT5/SDF2L1/ST6GAL1/TET2/MGAT1/MAN1A1/DPY19L1/GOLGA2	16
BP	GO:0000966	RNA 5'-end processing	3/732	19/10468	0.143441	0.96179	0.96179	RPP25/RPP14/RPP21	3
BP	GO:0001702	gastrulation with mouth forming second	3/732	19/10468	0.143441	0.96179	0.96179	FOXA2/ETS2/CRB2	3
BP	GO:0002097	tRNA wobble base modification	3/732	19/10468	0.143441	0.96179	0.96179	ALKBH8/ELP6/NSUN3	3
BP	GO:0006085	acetyl-CoA biosynthetic process	3/732	19/10468	0.143441	0.96179	0.96179	PDPR/PDK2/ACSS2	3
BP	GO:0007026	negative regulation of microtubule depolymerization	3/732	19/10468	0.143441	0.96179	0.96179	CKAP2/SPEF1/CLASP2	3
BP	GO:0009072	aromatic amino acid family metabolic process	3/732	19/10468	0.143441	0.96179	0.96179	PCBD1/FAH/ATP7A	3
BP	GO:0034472	snRNA 3'-end processing	3/732	19/10468	0.143441	0.96179	0.96179	INTS7/USB1/INTS12	3
BP	GO:0044346	fibroblast apoptotic process	3/732	19/10468	0.143441	0.96179	0.96179	BTG1/BAK1/MYC	3
BP	GO:0048147	negative regulation of fibroblast proliferation	3/732	19/10468	0.143441	0.96179	0.96179	C1QL4/MED31/MYC	3
BP	GO:0060330	regulation of response to interferon-gamma	3/732	19/10468	0.143441	0.96179	0.96179	NR1H2/TXK/JAK2	3
BP	GO:0060334	regulation of interferon-gamma-mediated signaling pathway	3/732	19/10468	0.143441	0.96179	0.96179	NR1H2/TXK/JAK2	3
BP	GO:0097421	liver regeneration	3/732	19/10468	0.143441	0.96179	0.96179	CCND1/GLI1/CEBPB	3
BP	GO:1901798	positive regulation of signal transduction by p53 class mediator	3/732	19/10468	0.143441	0.96179	0.96179	SPRED1/RPL26/EEF1E1	3
BP	GO:1904707	positive regulation of vascular smooth muscle cell proliferation	3/732	19/10468	0.143441	0.96179	0.96179	MDM2/MAP3K5/JAK2	3
BP	GO:0007156	homophilic cell adhesion via plasma membrane adhesion molecules	6/732	51/10468	0.14356	0.96179	0.96179	ITGB1/ROBO3/CDH15/FAT1/PCDHGA1/PCDHGA2	6
BP	GO:0006497	protein lipidation	8/732	74/10468	0.143979	0.96179	0.96179	GBA/PIGC/ZDHHC5/WIPI1/PIGZ/PIGY/ZDHHC14/ZDHHC12	8
BP	GO:0006959	humoral immune response	8/732	74/10468	0.143979	0.96179	0.96179	CFH/PHB/ST6GAL1/LEAP2/IL6/RPL30/LCN2/ATP7A	8
BP	GO:0048660	regulation of smooth muscle cell proliferation	8/732	74/10468	0.143979	0.96179	0.96179	MDM2/TPM1/ID2/MAP3K5/SOD2/IL6/NAMPT/JAK2	8
BP	GO:0050732	negative regulation of peptidyl-tyrosine phosphorylation	5/732	40/10468	0.144537	0.96179	0.96179	ERRFI1/TSG101/MVP/CHMP6/ZGPAT	5
BP	GO:1901136	carbohydrate derivative catabolic process	12/732	122/10468	0.144924	0.96179	0.96179	FBXO2/FBXO44/GBA/EDEM3/HDDC3/AHCY/EDEM1/IDUA/GM2A/MGAT1/FUCA2/NUDT1	12
BP	GO:0034612	response to tumor necrosis factor	17/732	184/10468	0.1451	0.96179	0.96179	PSMB4/GBA/XCL1/SGMS1/PSMA1/ADAM10/PSMB3/PSMD3/ACTN4/ZFP36L2/YTHDC2/LTB/MAPK14/MAP3K5/JAK2/PSMD5/LCN2	17
BP	GO:0007041	lysosomal transport	9/732	86/10468	0.145719	0.96179	0.96179	SORT1/NCOA4/TSG101/GNPTAB/NEDD4/AKTIP/VPS53/EPG5/AP3D1	9
BP	GO:0035567	non-canonical Wnt signaling pathway	11/732	110/10468	0.145881	0.96179	0.96179	PSMB4/PSMA1/CALM1/ARRB2/PSMB3/PSMD3/TNRC6C/AP2S1/NPHP3/IFT80/PSMD5	11
BP	GO:0043044	ATP-dependent chromatin remodeling	7/732	63/10468	0.149094	0.96179	0.96179	NASP/ITGB3BP/VPS72/SMARCC2/OIP5/HJURP/CENPC	7
BP	GO:0046887	positive regulation of hormone secretion	7/732	63/10468	0.149094	0.96179	0.96179	TACR2/MCU/C2CD2L/FOXL2/SRI/SYBU/JAK2	7
BP	GO:0090100	positive regulation of transmembrane receptor protein serine/threonine kinase signaling pathway	7/732	63/10468	0.149094	0.96179	0.96179	CDKN1C/GDF11/HES1/GDF9/CITED2/HIPK2/CRB2	7
BP	GO:0048285	organelle fission	29/732	339/10468	0.149808	0.96179	0.96179	GPR3/RCC1/NEK2/CDKN1C/AAAS/BRCA2/NUSAP1/ERCC4/LCMT1/SPAG5/CDC6/CHMP6/SPIRE1/SEH1L/ANAPC1/HIRA/RANBP1/DMC1/CLASP2/STAG1/SMC4/NCAPG/ANAPC4/PDS5A/CENPC/PHIP/PINX1/CDC26/GOLGA2	29
BP	GO:0071897	DNA biosynthetic process	15/732	160/10468	0.150429	0.96179	0.96179	NEK2/DTL/NVL/TEP1/ARRB2/PHB/PNKP/CCT8/POLN/WRNIP1/REV3L/MAP3K4/HNRNPA2B1/PINX1/MYC	15
BP	GO:0000338	protein deneddylation	2/732	10/10468	0.151412	0.96179	0.96179	COPS5/TOR1A	2
BP	GO:0001731	formation of translation preinitiation complex	2/732	10/10468	0.151412	0.96179	0.96179	EIF2D/RPL13A	2
BP	GO:0001780	neutrophil homeostasis	2/732	10/10468	0.151412	0.96179	0.96179	SLC7A11/IL6	2
BP	GO:0001963	synaptic transmission, dopaminergic	2/732	10/10468	0.151412	0.96179	0.96179	ARRB2/TOR1A	2
BP	GO:0002029	desensitization of G protein-coupled receptor signaling pathway	2/732	10/10468	0.151412	0.96179	0.96179	ARRB2/DNM1	2
BP	GO:0006995	cellular response to nitrogen starvation	2/732	10/10468	0.151412	0.96179	0.96179	MAP1LC3B2/MAP1LC3B	2
BP	GO:0007271	synaptic transmission, cholinergic	2/732	10/10468	0.151412	0.96179	0.96179	TACR2/ACHE	2
BP	GO:0009313	oligosaccharide catabolic process	2/732	10/10468	0.151412	0.96179	0.96179	MAN2C1/GM2A	2
BP	GO:0010715	regulation of extracellular matrix disassembly	2/732	10/10468	0.151412	0.96179	0.96179	CLASP2/IL6	2
BP	GO:0010842	retina layer formation	2/732	10/10468	0.151412	0.96179	0.96179	FJX1/HIPK2	2
BP	GO:0016339	calcium-dependent cell-cell adhesion via plasma membrane cell adhesion molecules	2/732	10/10468	0.151412	0.96179	0.96179	AJUBA/CDH15	2
BP	GO:0021533	cell differentiation in hindbrain	2/732	10/10468	0.151412	0.96179	0.96179	LHX5/ATP7A	2
BP	GO:0022401	negative adaptation of signaling pathway	2/732	10/10468	0.151412	0.96179	0.96179	ARRB2/DNM1	2
BP	GO:0023058	adaptation of signaling pathway	2/732	10/10468	0.151412	0.96179	0.96179	ARRB2/DNM1	2
BP	GO:0030852	regulation of granulocyte differentiation	2/732	10/10468	0.151412	0.96179	0.96179	HAX1/RUNX1	2
BP	GO:0033314	mitotic DNA replication checkpoint	2/732	10/10468	0.151412	0.96179	0.96179	ORC1/CDC6	2
BP	GO:0043562	cellular response to nitrogen levels	2/732	10/10468	0.151412	0.96179	0.96179	MAP1LC3B2/MAP1LC3B	2
BP	GO:0048715	negative regulation of oligodendrocyte differentiation	2/732	10/10468	0.151412	0.96179	0.96179	ID2/HES1	2
BP	GO:0051280	negative regulation of release of sequestered calcium ion into cytosol	2/732	10/10468	0.151412	0.96179	0.96179	CALM1/SRI	2
BP	GO:0051284	positive regulation of sequestering of calcium ion	2/732	10/10468	0.151412	0.96179	0.96179	CALM1/SRI	2
BP	GO:0070816	phosphorylation of RNA polymerase II C-terminal domain	2/732	10/10468	0.151412	0.96179	0.96179	GTF2H1/PPIL4	2
BP	GO:0070863	positive regulation of protein exit from endoplasmic reticulum	2/732	10/10468	0.151412	0.96179	0.96179	EDEM1/SLC35D3	2
BP	GO:0072574	hepatocyte proliferation	2/732	10/10468	0.151412	0.96179	0.96179	GLI1/CEBPB	2
BP	GO:0072575	epithelial cell proliferation involved in liver morphogenesis	2/732	10/10468	0.151412	0.96179	0.96179	GLI1/CEBPB	2
BP	GO:1900120	regulation of receptor binding	2/732	10/10468	0.151412	0.96179	0.96179	PTPRF/B2M	2
BP	GO:1901741	positive regulation of myoblast fusion	2/732	10/10468	0.151412	0.96179	0.96179	EHD2/MAPK14	2
BP	GO:1903332	regulation of protein folding	2/732	10/10468	0.151412	0.96179	0.96179	PDCD5/PDCL	2
BP	GO:1904706	negative regulation of vascular smooth muscle cell proliferation	2/732	10/10468	0.151412	0.96179	0.96179	TPM1/SOD2	2
BP	GO:1990440	positive regulation of transcription from RNA polymerase II promoter in response to endoplasmic reticulum stress	2/732	10/10468	0.151412	0.96179	0.96179	CEBPB/ATF4	2
BP	GO:2000194	regulation of female gonad development	2/732	10/10468	0.151412	0.96179	0.96179	GDF9/ZFPM2	2
BP	GO:2001185	regulation of CD8-positive, alpha-beta T cell activation	2/732	10/10468	0.151412	0.96179	0.96179	XCL1/RUNX1	2
BP	GO:0008593	regulation of Notch signaling pathway	8/732	75/10468	0.151975	0.96179	0.96179	ELF3/TSPAN14/MAML2/ADAM10/PDCD10/BCL6/HES1/MAML3	8
BP	GO:0048659	smooth muscle cell proliferation	8/732	75/10468	0.151975	0.96179	0.96179	MDM2/TPM1/ID2/MAP3K5/SOD2/IL6/NAMPT/JAK2	8
BP	GO:0061640	cytoskeleton-dependent cytokinesis	8/732	75/10468	0.151975	0.96179	0.96179	JTB/BRCA2/CKAP2/NUSAP1/CHMP6/SPIRE1/KIF20A/EFHC1	8
BP	GO:0071456	cellular response to hypoxia	14/732	148/10468	0.152932	0.96179	0.96179	PSMB4/PSMA1/MDM2/AJUBA/PSMB3/PSMD3/BACH1/CPEB2/STC2/CITED2/HIPK2/MYC/PSMD5/ATP7A	14
BP	GO:0051494	negative regulation of cytoskeleton organization	10/732	99/10468	0.153167	0.96179	0.96179	CAPZA1/NEK2/CKAP2/NUBP1/SPTBN4/EML2/SPEF1/PICK1/CLASP2/VILL	10
BP	GO:0075733	intracellular transport of virus	6/732	52/10468	0.153343	0.96179	0.96179	TSG101/NUP160/AAAS/SEH1L/NUP205/VPS37A	6
BP	GO:0009108	coenzyme biosynthetic process	19/732	211/10468	0.153392	0.96179	0.96179	PCBD1/NUP160/PTS/AAAS/GPHN/PPCDC/MTHFS/PDPR/PDK2/SEH1L/ACSS2/SLC25A1/COQ2/ACSL6/PCBD2/OGDH/NAMPT/NUP205/COQ4	19
BP	GO:0022407	regulation of cell-cell adhesion	19/732	211/10468	0.153392	0.96179	0.96179	PTPRU/BCL10/XCL1/FADD/PIEZO1/AP3D1/LRFN3/FOXA2/CEBPB/RUNX1/GRAP2/BCL6/HES1/ADTRP/MAPK14/CITED2/IL6/JAK2/EFNB1	19
BP	GO:0018279	protein N-linked glycosylation via asparagine	4/732	30/10468	0.154302	0.96179	0.96179	FUT8/MCFD2/ST6GAL1/MGAT1	4
BP	GO:0036258	multivesicular body assembly	4/732	30/10468	0.154302	0.96179	0.96179	TSG101/VPS36/CHMP6/VPS37A	4
BP	GO:0060038	cardiac muscle cell proliferation	4/732	30/10468	0.154302	0.96179	0.96179	GLI1/JARID2/MAPK14/ZFPM2	4
BP	GO:0070228	regulation of lymphocyte apoptotic process	4/732	30/10468	0.154302	0.96179	0.96179	BCL10/FADD/BCL6/FNIP1	4
BP	GO:1904591	positive regulation of protein import	4/732	30/10468	0.154302	0.96179	0.96179	EFCAB7/PDCD5/MAPK14/UBR5	4
BP	GO:0043624	cellular protein complex disassembly	17/732	186/10468	0.155087	0.96179	0.96179	CAPZA1/MRPS16/MRPL49/CKAP2/MRPS7/MRPL38/MRPL4/MRPS12/SPTBN4/SPEF1/MRPS6/CLASP2/VILL/MRPS22/MRPL22/MRPS33/MRPS28	17
BP	GO:0030279	negative regulation of ossification	5/732	41/10468	0.155776	0.96179	0.96179	CHSY1/AXIN2/ID2/CDK6/TMEM64	5
BP	GO:0032024	positive regulation of insulin secretion	5/732	41/10468	0.155776	0.96179	0.96179	MCU/C2CD2L/SRI/SYBU/JAK2	5
BP	GO:0006513	protein monoubiquitination	7/732	64/10468	0.15801	0.96179	0.96179	DTL/TSG101/PCGF2/ATXN7L3/RYBP/UBE3D/CUL1	7
BP	GO:0042273	ribosomal large subunit biogenesis	7/732	64/10468	0.15801	0.96179	0.96179	MRTO4/NVL/RPL26/RPL3/SDAD1/RPL7L1/RPL35	7
BP	GO:0045667	regulation of osteoblast differentiation	7/732	64/10468	0.15801	0.96179	0.96179	GLI1/AXIN2/ID2/CEBPB/IL6/CDK6/TMEM64	7
BP	GO:0046632	alpha-beta T cell differentiation	7/732	64/10468	0.15801	0.96179	0.96179	AP3D1/IL18R1/RUNX1/BCL6/PRDM1/IL6/ATP7A	7
BP	GO:0071887	leukocyte apoptotic process	7/732	64/10468	0.15801	0.96179	0.96179	BCL10/FADD/BCL6/SLC7A11/FNIP1/BAK1/IL6	7
BP	GO:0060541	respiratory system development	11/732	112/10468	0.159054	0.96179	0.96179	ERRFI1/MAN1A2/GLI1/ALDH1A2/RAB3A/NPHP3/HES1/SLC7A11/AIMP2/ZFPM2/ATP7A	11
BP	GO:0007369	gastrulation	10/732	100/10468	0.160267	0.96179	0.96179	ITGB1/EXT2/MMP15/FOXA2/ARFRP1/ETS2/HIRA/CLASP2/NPHP3/CRB2	10
BP	GO:0002707	negative regulation of lymphocyte mediated immunity	3/732	20/10468	0.160492	0.96179	0.96179	XCL1/ARRB2/BCL6	3
BP	GO:0006293	nucleotide-excision repair, preincision complex stabilization	3/732	20/10468	0.160492	0.96179	0.96179	GTF2H1/ERCC5/ERCC4	3
BP	GO:0006295	nucleotide-excision repair, DNA incision, 3'-to lesion	3/732	20/10468	0.160492	0.96179	0.96179	GTF2H1/ERCC5/ERCC4	3
BP	GO:0010499	proteasomal ubiquitin-independent protein catabolic process	3/732	20/10468	0.160492	0.96179	0.96179	PSMB4/PSMA1/PSMB3	3
BP	GO:0035774	positive regulation of insulin secretion involved in cellular response to glucose stimulus	3/732	20/10468	0.160492	0.96179	0.96179	C2CD2L/SRI/SYBU	3
BP	GO:0042036	negative regulation of cytokine biosynthetic process	3/732	20/10468	0.160492	0.96179	0.96179	ERRFI1/TRIB2/IL6	3
BP	GO:0045577	regulation of B cell differentiation	3/732	20/10468	0.160492	0.96179	0.96179	ID2/ZFP36L2/TLR9	3
BP	GO:0048011	neurotrophin TRK receptor signaling pathway	3/732	20/10468	0.160492	0.96179	0.96179	SORT1/AKT1S1/TMEM108	3
BP	GO:0061082	myeloid leukocyte cytokine production	3/732	20/10468	0.160492	0.96179	0.96179	BCL10/GPRC5B/BCL6	3
BP	GO:2000515	negative regulation of CD4-positive, alpha-beta T cell activation	3/732	20/10468	0.160492	0.96179	0.96179	XCL1/RUNX1/BCL6	3
BP	GO:0001909	leukocyte mediated cytotoxicity	6/732	53/10468	0.163413	0.96179	0.96179	XCL1/FADD/B2M/ARRB2/STX7/ULBP2	6
BP	GO:0048144	fibroblast proliferation	6/732	53/10468	0.163413	0.96179	0.96179	C1QL4/MED31/CDC6/FOSL2/CDK6/MYC	6
BP	GO:0048145	regulation of fibroblast proliferation	6/732	53/10468	0.163413	0.96179	0.96179	C1QL4/MED31/CDC6/FOSL2/CDK6/MYC	6
BP	GO:0002244	hematopoietic progenitor cell differentiation	12/732	125/10468	0.163738	0.96179	0.96179	PSMB4/PSMA1/TCF12/PSMB3/PSMD3/SIPA1L3/RUNX1/HES1/FNIP1/HSPA9/CDK6/PSMD5	12
BP	GO:0000209	protein polyubiquitination	23/732	265/10468	0.165549	0.96179	0.96179	FBXO2/FBXO44/PSMB4/DTL/PSMA1/ZFP91/TPP2/NEDD4/FBXL19/PSMB3/PSMD3/ANAPC1/FBXL5/ANAPC4/MYLIP/UBE3D/SHPRH/ZNRF2/CUL1/LONRF1/UBR5/CDC26/PSMD5	23
BP	GO:0030534	adult behavior	7/732	65/10468	0.167162	0.96179	0.96179	FADD/ARRB2/SPTBN4/ID2/FOXA2/SLC7A11/HIPK2	7
BP	GO:0043648	dicarboxylic acid metabolic process	7/732	65/10468	0.167162	0.96179	0.96179	SDHB/ALDH4A1/MTHFS/GAD1/SLC7A11/ME1/OGDH	7
BP	GO:0032649	regulation of interferon-gamma production	5/732	42/10468	0.167362	0.96179	0.96179	XCL1/FADD/IL18R1/TLR9/TXK	5
BP	GO:0034394	protein localization to cell surface	5/732	42/10468	0.167362	0.96179	0.96179	PTPRU/LRIG2/STX3/GGA3/TOR1A	5
BP	GO:0070227	lymphocyte apoptotic process	5/732	42/10468	0.167362	0.96179	0.96179	BCL10/FADD/BCL6/FNIP1/BAK1	5
BP	GO:0000154	rRNA modification	4/732	31/10468	0.168016	0.96179	0.96179	RRNAD1/FBL/NSUN3/NSUN5	4
BP	GO:0006458	'de novo' protein folding	4/732	31/10468	0.168016	0.96179	0.96179	HSPA13/HSPA9/TOR2A/TOR1A	4
BP	GO:0006778	porphyrin-containing compound metabolic process	4/732	31/10468	0.168016	0.96179	0.96179	UROD/RSAD1/SLC25A38/CPOX	4
BP	GO:0009311	oligosaccharide metabolic process	4/732	31/10468	0.168016	0.96179	0.96179	FUT8/MAN2C1/IDUA/GM2A	4
BP	GO:0018196	peptidyl-asparagine modification	4/732	31/10468	0.168016	0.96179	0.96179	FUT8/MCFD2/ST6GAL1/MGAT1	4
BP	GO:0036257	multivesicular body organization	4/732	31/10468	0.168016	0.96179	0.96179	TSG101/VPS36/CHMP6/VPS37A	4
BP	GO:1902475	L-alpha-amino acid transmembrane transport	4/732	31/10468	0.168016	0.96179	0.96179	SLC25A15/SLC43A2/SLC25A38/SLC7A11	4
BP	GO:1902883	negative regulation of response to oxidative stress	4/732	31/10468	0.168016	0.96179	0.96179	GGT7/ATF4/SLC7A11/SOD2	4
BP	GO:0002377	immunoglobulin production	8/732	77/10468	0.168587	0.96179	0.96179	XCL1/ATAD5/TLR9/BCL6/PMS2/IL6/PAXIP1/NBN	8
BP	GO:0031145	anaphase-promoting complex-dependent catabolic process	8/732	77/10468	0.168587	0.96179	0.96179	PSMB4/PSMA1/PSMB3/PSMD3/ANAPC1/ANAPC4/CDC26/PSMD5	8
BP	GO:0042158	lipoprotein biosynthetic process	8/732	77/10468	0.168587	0.96179	0.96179	GBA/PIGC/ZDHHC5/WIPI1/PIGZ/PIGY/ZDHHC14/ZDHHC12	8
BP	GO:0006612	protein targeting to membrane	15/732	164/10468	0.172828	0.96179	0.96179	RPS27/RPL41/SRP14/RPL4/RPL26/CDK5R1/RPL13A/RPS11/RPL3/BHLHE40-AS1/ZDHHC14/VPS37A/RPL30/RPL35/ZDHHC12	15
BP	GO:0010717	regulation of epithelial to mesenchymal transition	6/732	54/10468	0.173757	0.96179	0.96179	BCL9L/AXIN2/FOXA2/CLASP2/IL6/CRB2	6
BP	GO:0033260	nuclear DNA replication	6/732	54/10468	0.173757	0.96179	0.96179	BRCA2/ATAD5/CDC45/BCL6/PRIM2/DBF4	6
BP	GO:0046794	transport of virus	6/732	54/10468	0.173757	0.96179	0.96179	TSG101/NUP160/AAAS/SEH1L/NUP205/VPS37A	6
BP	GO:1901570	fatty acid derivative biosynthetic process	6/732	54/10468	0.173757	0.96179	0.96179	FAR1/GGT7/SLC25A1/MGST2/ACSL6/TBXAS1	6
BP	GO:0042254	ribosome biogenesis	23/732	267/10468	0.174513	0.96179	0.96179	MRTO4/RPS27/ISG20L2/RRNAD1/NVL/HEATR1/DDX10/PWP1/RPP25/IMP3/PELP1/RPL26/MRPS7/WDR18/FBL/FAM207A/RPL3/NSUN3/SDAD1/MRPL22/RPL7L1/NSUN5/RPL35	23
BP	GO:0003002	regionalization	17/732	190/10468	0.176143	0.96179	0.96179	NBL1/AIDA/GDF11/GLI1/ALDH1A2/CHSY1/PCGF2/HOXB5/AXIN2/FOXA2/ETS2/BHLHE40/TRA2B/HES1/CITED2/HIPK2/CRB2	17
BP	GO:0031668	cellular response to extracellular stimulus	17/732	190/10468	0.176143	0.96179	0.96179	SESN2/GBA/SIK2/MDM2/MAP1LC3B2/MAP1LC3B/PDK2/WIPI1/SEH1L/FOXA2/PICK1/ATF4/FNIP1/MAP3K5/NUDT1/NAMPT/LCN2	17
BP	GO:0043280	positive regulation of cysteine-type endopeptidase activity involved in apoptotic process	9/732	90/10468	0.176501	0.96179	0.96179	BCL10/FADD/PDCD5/CASP10/FOXL2/BAK1/MAP3K5/MYC/JAK2	9
BP	GO:0051983	regulation of chromosome segregation	9/732	90/10468	0.176501	0.96179	0.96179	SFPQ/NEK2/LCMT1/SPAG5/CDC6/AXIN2/ANAPC1/ANAPC4/CDC26	9
BP	GO:2000278	regulation of DNA biosynthetic process	9/732	90/10468	0.176501	0.96179	0.96179	NEK2/NVL/ARRB2/PNKP/CCT8/MAP3K4/HNRNPA2B1/PINX1/MYC	9
BP	GO:0032103	positive regulation of response to external stimulus	14/732	152/10468	0.176518	0.96179	0.96179	ARTN/PTGER3/XCL1/STX3/ADAM10/GPRC5B/THBD/CEBPB/TLR9/MGST2/OSMR/MAPK14/IL6/JAK2	14
BP	GO:0002456	T cell mediated immunity	7/732	66/10468	0.176542	0.96179	0.96179	XCL1/FADD/B2M/IL18R1/STX7/ULBP2/IL6	7
BP	GO:0048199	vesicle targeting, to, from or within Golgi	7/732	66/10468	0.176542	0.96179	0.96179	SEC23A/GOSR1/WIPI1/MCFD2/SEC31A/SEC24D/GOLGA2	7
BP	GO:0051289	protein homotetramerization	7/732	66/10468	0.176542	0.96179	0.96179	PCBD1/B2M/ALDH1A2/PCBD2/SOD2/DECR1/GOLGA2	7
BP	GO:0006004	fucose metabolic process	2/732	11/10468	0.176882	0.96179	0.96179	FUT8/FUCA2	2
BP	GO:0006241	CTP biosynthetic process	2/732	11/10468	0.176882	0.96179	0.96179	NME1/UCKL1	2
BP	GO:0006684	sphingomyelin metabolic process	2/732	11/10468	0.176882	0.96179	0.96179	SGMS1/SMPD1	2
BP	GO:0006691	leukotriene metabolic process	2/732	11/10468	0.176882	0.96179	0.96179	GGT7/MGST2	2
BP	GO:0009650	UV protection	2/732	11/10468	0.176882	0.96179	0.96179	ERCC5/ERCC4	2
BP	GO:0010669	epithelial structure maintenance	2/732	11/10468	0.176882	0.96179	0.96179	TLR9/SLC22A5	2
BP	GO:0010818	T cell chemotaxis	2/732	11/10468	0.176882	0.96179	0.96179	XCL1/ADAM10	2
BP	GO:0021884	forebrain neuron development	2/732	11/10468	0.176882	0.96179	0.96179	UQCRQ/ATP7A	2
BP	GO:0033599	regulation of mammary gland epithelial cell proliferation	2/732	11/10468	0.176882	0.96179	0.96179	CCND1/BRCA2	2
BP	GO:0034982	mitochondrial protein processing	2/732	11/10468	0.176882	0.96179	0.96179	AFG3L2/IMMP2L	2
BP	GO:0035721	intraciliary retrograde transport	2/732	11/10468	0.176882	0.96179	0.96179	IFT43/ICK	2
BP	GO:0036037	CD8-positive, alpha-beta T cell activation	2/732	11/10468	0.176882	0.96179	0.96179	XCL1/RUNX1	2
BP	GO:0045475	locomotor rhythm	2/732	11/10468	0.176882	0.96179	0.96179	ID2/NCOA2	2
BP	GO:0046036	CTP metabolic process	2/732	11/10468	0.176882	0.96179	0.96179	NME1/UCKL1	2
BP	GO:0046501	protoporphyrinogen IX metabolic process	2/732	11/10468	0.176882	0.96179	0.96179	UROD/CPOX	2
BP	GO:0048799	animal organ maturation	2/732	11/10468	0.176882	0.96179	0.96179	ALDH1A2/PLXNB1	2
BP	GO:0051004	regulation of lipoprotein lipase activity	2/732	11/10468	0.176882	0.96179	0.96179	SORT1/NR1H2	2
BP	GO:0071712	ER-associated misfolded protein catabolic process	2/732	11/10468	0.176882	0.96179	0.96179	SDF2L1/TOR1A	2
BP	GO:0072576	liver morphogenesis	2/732	11/10468	0.176882	0.96179	0.96179	GLI1/CEBPB	2
BP	GO:0099558	maintenance of synapse structure	2/732	11/10468	0.176882	0.96179	0.96179	RAB3A/DLG3	2
BP	GO:1901739	regulation of myoblast fusion	2/732	11/10468	0.176882	0.96179	0.96179	EHD2/MAPK14	2
BP	GO:1990000	amyloid fibril formation	2/732	11/10468	0.176882	0.96179	0.96179	MDM2/B2M	2
BP	GO:2000047	regulation of cell-cell adhesion mediated by cadherin	2/732	11/10468	0.176882	0.96179	0.96179	PTPRU/FOXA2	2
BP	GO:2000050	regulation of non-canonical Wnt signaling pathway	2/732	11/10468	0.176882	0.96179	0.96179	NPHP3/IFT80	2
BP	GO:0090092	regulation of transmembrane receptor protein serine/threonine kinase signaling pathway	12/732	127/10468	0.17693	0.96179	0.96179	NBL1/CDKN1C/BCL9L/GDF11/DAND5/EID2/LTBP1/HES1/GDF9/CITED2/HIPK2/CRB2	12
BP	GO:0042742	defense response to bacterium	8/732	78/10468	0.177191	0.96179	0.96179	TLR5/SEH1L/CEBPB/TLR9/LEAP2/IL6/RPL30/LCN2	8
BP	GO:0007018	microtubule-based movement	19/732	216/10468	0.178047	0.96179	0.96179	SFPQ/ARHGAP21/RAB21/IFT43/RHOT2/CFAP20/IFT20/AP3D1/DYNLRB1/COPG1/NPHP3/TMEM108/IFT80/KIF20A/ICK/TTC26/PCM1/SYBU/WDR34	19
BP	GO:0001539	cilium or flagellum-dependent cell motility	3/732	21/10468	0.178116	0.96179	0.96179	CFAP20/SPEF1/EFHC1	3
[truncated: 4,990 more rows]
