# Supplementary material for: Cell cycle arrest explains the observed bulk 3D genomic alterations in response to long-term heat shock in K562 cells
Source: HighWire-hosted journal article supplement (doi:10.1101/gr.276554.122), 2022-07-01
Supplement: Supplemental_Table_S4.xlsx [file Supplemental_Table_S4.xlsx]

## Sheet: Sheet1
Biological processes which were affected by the heat shock induced transcription inhibition.
Term	Category	Count	%	PValue	Genes	List Total	Pop Hits	Pop Total	Fold Enrichment	Bonferroni	Benjamini	FDR
GO:0006281~DNA repair	GOTERM_BP_DIRECT	63	2.74629	1.97511e-10	RPAIN, SMG1, TRRAP, FOXM1, BACH1, CDC14B, CHAF1B, HELB, EME2, TOPBP1, NBN, POLE, RFC5, GEN1, PARP3, SUPT16H, PARP4, LIG1, PARP1, DDX11, USP45, ACTL6A, HUS1, LIG3, CSNK1D, CHD1L, SMC1A, SIRT1, UCHL5, DDB2, RAD51B, MSH6, NSMCE4A, MSH2, FANCD2, PSME4, RBM14-RBM4, ASF1A, PIF1, XPA, RPS27L, PDS5A, SLX4, TDG, RAD54L, MUTYH, UVRAG, ERCC6L2, FANCL, XRCC3, FANCA, INO80, POLA1, RAD51, TAOK3, ERCC3, TAOK1, …	1934	235	16792	2.32766	8.99465e-07	8.99465e-07	8.9433e-07
GO:0051301~cell division	GOTERM_BP_DIRECT	81	3.53095	1.00745e-09	RB1, CCNK, CCNT2, NUMA1, CDCA7L, CCNF, CETN3, NCAPG2, KIF14, SMC5, KIF11, NR3C1, SMC4, SEPT9, TUBA1C, PPP1CC, TUBA1B, SENP5, CHMP1B, CDC27, ZNF207, NEK2, LRRCC1, HELLS, BORA, LIG1, USP44, TUBB, NSUN2, LIG3, ATAD3B, SMC1A, CDC25C, KNSTRN, HAUS2, SEPT2, ZNF16, CCNA2, LATS2, CCNE2, CCNE1, ZW10, TIMELESS, ANAPC4, BIRC6, ARHGEF2, KIF20B, ANAPC2, USP16, CDCA4, RNF8, NCAPG, PARD6G, PDS5A, SKA3, ANAPC10,…	1934	350	16792	2.00938	4.58792e-06	2.29397e-06	2.28087e-06
GO:0007049~cell cycle	GOTERM_BP_DIRECT	55	2.39756	2.6044e-08	STEAP3, CCNT2, DDX12P, FOXM1, CHTF18, RCBTB1, PDCD2L, SEPT9, CHAF1B, SENP5, MCIDAS, RB1CC1, TLK2, HMG20B, TRIM21, USP2, TET2, LIG3, SEPT2, ZNF16, HCFC1, RBL2, RINT1, PARD3, TRNP1, ERF, CHMP3, PFDN1, ERH, SIK1, MCM2, DTYMK, USP16, PARD6G, TXLNG, CREBL2, DBF4B, LIN9, AURKB, RBBP4, MARVELD1, E2F2, MAPK1, MAPK3, JAG2, HACE1, USP22, SPDYC, SIAH2, PPP1CA, KRT18, NASP, RAD17, CAMK1, TAF1	1934	217	16792	2.20064	0.000118597	3.45759e-05	3.43785e-05
GO:0006351~transcription, DNA-templated	GOTERM_BP_DIRECT	301	13.1212	3.03697e-08	RB1, TRRAP, KEAP1, NOC2L, C14ORF169, RCBTB1, UBE2L3, MCIDAS, SAP130, ZNF826P, BBX, CCNL2, TRIM27, ZNF841, VPS36, MNX1, HES6, ZNF18, SMARCC1, ZNF283, CSNK2A1, ZNF282, DDX11, CSNK2A2, MED9, ZNF12, ZNF16, EID2, MSL3P1, ZNF837, THAP7, VOPP1, ATF7, ZNF711, PREB, ZNF710, HOXB7, ASF1A, ASF1B, ZNF276, ZNF397, ZNF28, L3MBTL2, PAXIP1, CTBP2, MYCBP2, GATA2, ZNF24, HIF1A, ZNF26, MIER3, DHX36, ZNF700, ZNF267,…	1934	1955	16792	1.3368	0.000138294	3.45759e-05	3.43785e-05
GO:0006364~rRNA processing	GOTERM_BP_DIRECT	54	2.35397	4.14857e-08	LTV1, RPL4, DIS3L, CHD7, RPL6, WDR43, RPS4X, RPS15, RPS14, RPL7A, NOB1, RPL36, RPL35, RIOK1, RPL39, RPS10, RPS7, IMP3, DIS3, RPS5, TEX10, WDR75, RPL13A, CSNK1D, SENP3, SIRT1, EBNA1BP2, XRN2, MRTO4, RPP21, RPL28, UBA52, RNASEL, RPL36A, RPS27L, NOL9, EXOSC7, EMG1, EXOSC10, RPS15A, EXOSC8, EXOSC2, NOP56, RPL35A, RPL23A, PA2G4, WDR12, BOP1, TBL3, RPS29, NOL11, RPS21, RPS24, MPHOSPH6	1934	214	16792	2.19092	0.000188908	3.77851e-05	3.75694e-05
GO:0016925~protein sumoylation	GOTERM_BP_DIRECT	34	1.48213	6.49397e-07	TOP2A, TOP2B, SP100, NUP205, L3MBTL2, PCNA, SMC5, RNF2, AURKB, SENP6, MTA1, SENP5, KIAA1586, NUP85, TDG, NFATC2IP, NUP43, NUP214, NDC1, UBE2I, PARP1, CBX4, RING1, CBX2, NUP153, SMC1A, NUP93, NSMCE4A, INCENP, NUP50, SP3, NUP35, HNRNPC, NUPL2	1934	117	16792	2.52313	0.00295299	0.000492893	0.000490078
GO:0000070~mitotic sister chromatid segregation	GOTERM_BP_DIRECT	14	0.610288	8.16052e-07	PLK1, INO80, SMC1A, SMC4, KNSTRN, DSN1, ESPL1, CEP57L1, ZW10, NUSAP1, ZNF207, NEK2, BUB3, MAD2L1	1934	25	16792	4.86221	0.0037094	0.0005309	0.000527869
GO:0042795~snRNA transcription from RNA polymerase II promoter	GOTERM_BP_DIRECT	24	1.04621	1.82122e-06	ZNF143, CCNK, GTF2A2, CCNT2, ELL, ICE1, INTS1, ICE2, GTF2B, INTS10, ZC3H8, RPRD2, GTF2F2, RPAP2, SNAPC5, CDK7, POLR2A, SP1, ASUN, INTS5, INTS4, INTS7, RPRD1B, RPRD1A	1934	70	16792	2.97687	0.00825953	0.00103673	0.00103081
GO:0019083~viral transcription	GOTERM_BP_DIRECT	32	1.39494	2.1803e-06	RPL4, NUP205, RPL36A, RPL6, RPS15, RPS4X, RPS14, RPL7A, RPS15A, NUP85, RPL36, RPL35, NUP43, RPL39, RPS10, NUP214, NDC1, RPS7, RPS5, RPL35A, RPL13A, RPL23A, NUP153, NUP93, RPS29, NUP50, NUP35, NUPL2, RPL28, UBA52, RPS21, RPS24	1934	112	16792	2.48072	0.00987997	0.00110323	0.00109693
GO:0016032~viral process	GOTERM_BP_DIRECT	63	2.74629	2.66078e-06	RB1, YWHAE, NCKAP1, WDR48, CALCOCO2, CRTC1, YWHAB, GTF2B, SYNCRIP, NDC1, NUP214, MORC3, RBM15, CAMLG, DDX11, KRT8, CDC25C, SIRT1, RHOA, MSH6, NUP93, CCNA2, PSMA3, LMBRD1, NFX1, NUP50, ATF7, ANKRD17, RALA, GTF2A2, SP100, NUP205, NLRX1, UBR4, PSMB2, NUP85, MAPK1, NUP43, WASF2, EIF4E, BUB1, PAK2, MAPK3, KDM4A, UBE2I, CBX5, NUP153, SRPK1, POLA1, PDCL3, DLG1, COPS6, KRT18, ERCC3, SP1, ERCC2, ZYX, NUP3…	1934	299	16792	1.82943	0.0120441	0.00121172	0.0012048
GO:0006355~regulation of transcription, DNA-templated	GOTERM_BP_DIRECT	230	10.0262	3.02195e-06	CCNK, TRRAP, KEAP1, BACH1, RCBTB1, RPL6, UBE2L3, RPS6KA4, PPP2R1A, SAP130, ZNF826P, BBX, CCNL2, ZNF841, VPS36, HES6, ZNF283, CSNK2A1, ZNF282, CSNK2A2, ZNF12, RUNX2, ZNF16, HCFC1, ZNF837, RFX7, XRN2, VOPP1, TBPL1, ATF7, ZNF711, PREB, PRKCQ, HOXB7, ASF1B, ATF4, ZNF276, ZNF397, ZNF28, L3MBTL2, MYCBP2, HIF1A, CDKN2AIP, ZNF26, MIER3, ZNF700, ZNF267, ZNF142, HACE1, ZRANB2, ZNF260, MOV10, ZNF37A, FUBP1,…	1934	1504	16792	1.32778	0.0136677	0.00125109	0.00124394
GO:0007067~mitotic nuclear division	GOTERM_BP_DIRECT	54	2.35397	5.56079e-06	CCNK, NUMA1, CCNF, CETN3, NCAPG2, SMC5, KIF11, NR3C1, PBK, NEK2, LRRCC1, HELLS, PBRM1, PPP1R12A, BORA, USP44, NSUN2, CDC25C, HAUS2, SEPT2, EML4, CCNA2, LATS2, INCENP, ZW10, TIMELESS, ANAPC4, BIRC6, ARHGEF2, KIF20B, ANAPC2, USP16, RNF8, SKA3, ANAPC10, AURKB, ANAPC11, ASUN, KATNA1, NUP43, BUB1, NEK9, UBE2I, NEK6, RCC2, SETDB2, PLK1, MAD2L2, TPX2, TADA2A, REEP4, CDC16, TADA3, CDK1	1934	248	16792	1.89055	0.0250059	0.00211032	0.00209827
GO:0006468~protein phosphorylation	GOTERM_BP_DIRECT	85	3.70532	7.80703e-06	SCYL3, CCNK, CCNT2, GMFB, ZAK, FASTKD2, MAST1, PRKAG1, PRKAG2, CCNC, RPS6KA4, NRBP2, PPP3CB, PPP4R1, RSRC1, TLK2, PBK, NEK2, CPNE3, RIOK1, MAP3K9, PSKH1, MORC3, PRKCH, CSNK2A1, CHUK, STRADA, STRADB, CSNK2A2, MATK, HUS1, CSNK1D, PRPF4B, OXSR1, PHKA2, TGFBR1, ERN1, BCR, LATS2, CCNE1, PDIK1L, MAK, FASTKD5, SIK1, BIRC6, SGK3, ALPK1, TRIB1, CDKL1, RNASEL, PKN3, CAMKK1, AURKB, STK3, MAPK9, NUAK2, IRAK1…	1934	456	16792	1.61845	0.0349288	0.00273486	0.00271925
GO:0043161~proteasome-mediated ubiquitin-dependent protein catabolic process	GOTERM_BP_DIRECT	46	2.00523	1.03864e-05	PSMD11, UBXN2B, RNF38, KIF14, RNF4, ANAPC10, ANAPC11, ARNTL, PSMD8, ZNRF1, MTA1, RMND5A, BTBD1, PSMB2, PSMD5, CDC27, BUB3, GTSE1, RNF44, SMURF1, USP44, SIAH2, AXIN1, WWP1, KCTD2, SIRT1, RNF145, PSMA3, UBE2R2, PSMA1, TBL1XR1, PSMC1, PSME4, CDC16, CDK1, TRIM13, RLIM, ERCC8, CTNNB1, PLAA, RNF181, ANAPC4, UBA52, UBE2K, MAD2L1, ANAPC2	1934	203	16792	1.96747	0.0461988	0.00337855	0.00335926
GO:0007059~chromosome segregation	GOTERM_BP_DIRECT	22	0.959024	1.50415e-05	TOP2A, NEK9, UVRAG, UBE2I, DDX3X, NDE1, NEK6, SETDB2, KIF11, NR3C1, SKA3, KNSTRN, SRPK1, DSN1, INCENP, PPP2R1A, FAM175B, ERCC2, TLK2, NEK2, CEP85, CDK5RAP2	1934	68	16792	2.80905	0.0662062	0.0045666	0.00454053
GO:0000398~mRNA splicing, via spliceosome	GOTERM_BP_DIRECT	48	2.09241	2.37745e-05	DHX8, CSTF3, SRSF1, HNRNPU, HNRNPR, DDX41, PRPF19, CWC27, U2AF1L4, UBL5, SYNCRIP, HELB, SART3, SNRPD2, POLR2A, SNRNP70, RSRC1, DHX35, TRA2B, TRA2A, RAVER2, SRSF10, SF3B1, SRSF11, SF3A3, AQR, HNRNPA3, RBM15, FUS, CPSF3, PRPF40B, PRPF4B, LSM5, GTF2F2, HNRNPL, LSM7, LSM6, DDX39B, HNRNPF, GEMIN5, SRSF3, PPIH, SNRPF, HNRNPC, SRSF6, SRSF7, RBMX, SUGP1	1934	222	16792	1.8773	0.102615	0.00676682	0.00672818
GO:0006260~DNA replication	GOTERM_BP_DIRECT	37	1.6129	2.69415e-05	PCNA, MCM9, CHTF18, REPIN1, ING5, POLD4, CHAF1B, HELB, ORC6, SLX4, RBBP4, C10ORF2, NT5M, TOPBP1, NBN, POLE, BARD1, RFC5, RRM1, SUPT16H, LIG1, GINS4, HUS1, NAP1L1, LIG3, CDC25C, SIRT1, POLA1, DNAJC2, NASP, POLE3, RBM14-RBM4, TIMELESS, CDK1, RAD17, DNA2, MCM2	1934	155	16792	2.0726	0.115465	0.00721715	0.00717594
GO:0006412~translation	GOTERM_BP_DIRECT	52	2.26678	4.37336e-05	MRPS17, RPL4, SLC25A3, MRPS11, MRPS12, MRPL36, RPL6, RPS4X, RPS15, RPS14, RPL7A, MRPL1, RPL36AL, RPL36, RPL35, RPL39, RPS10, RPL36A-HNRNPH2, RPS7, RPS5, MRPS23, MRPS18B, MRPS21, RPL13A, MRPL52, MRPS9, SLC25A19, GUF1, SLC25A12, RPL28, UBA52, MRRF, SLC25A13, MRPL19, RPL36A, RPS27L, MRPL15, SLC25A26, RPS15A, HARS, EEFSEC, RPL39L, MRPL27, RPL35A, RPL23A, MRPL21, RSL1D1, TNIP1, RPS29, SLC25A30, RPS21,…	1934	253	16792	1.78455	0.180587	0.0110646	0.0110014
GO:0000184~nuclear-transcribed mRNA catabolic process, nonsense-mediated decay	GOTERM_BP_DIRECT	30	1.30776	6.29569e-05	RPL4, SMG1, RPL36A, RPL6, GSPT1, RPS15, PPP2CA, RPS4X, RPS14, RPL7A, RPS15A, EXOSC10, PPP2R1A, RPL36, RPL35, RPL39, RPS10, RPS7, RPS5, RPL35A, RPL13A, RPL23A, UPF3A, MAGOHB, RPS29, ETF1, RPL28, UBA52, RPS21, RPS24	1934	119	16792	2.18887	0.249274	0.0150898	0.0150036
GO:0051726~regulation of cell cycle	GOTERM_BP_DIRECT	30	1.30776	0.000137926	RB1, USP16, CCNI, CCNF, PTEN, TXLNG, LIN9, FOXM1, FGF2, ARNTL, MNT, RBBP4, E2F2, E2F5, JUNB, CLIC1, PHACTR4, NUP214, MED1, PLK1, CDC25C, BCR, RBL2, BOP1, CCNE2, CCNE1, MAK, TRNP1, TARDBP, CDKL1	1934	124	16792	2.10061	0.466428	0.0314059	0.0312266
GO:0032897~negative regulation of viral transcription	GOTERM_BP_DIRECT	8	0.348736	0.000242001	TRIM8, SP100, ZFP36, TRIM62, TRIM13, TRIM27, TRIM21, TRIM11	1934	13	16792	5.34309	0.667862	0.0524795	0.0521799
GO:0006376~mRNA splice site selection	GOTERM_BP_DIRECT	9	0.392328	0.000282805	SETX, YTHDC1, CELF2, SRSF1, LUC7L3, SRSF6, SRSF10, RBMX, PTBP2	1934	17	16792	4.59663	0.7242	0.0585407	0.0582065
GO:0006366~transcription from RNA polymerase II promoter	GOTERM_BP_DIRECT	86	3.74891	0.00032798	ATF1, CSRNP1, TCERG1, CCNK, CCNT2, SPI1, GMEB2, LDB1, ELL, GTF2B, NUCKS1, FOXM1, MED16, PHRF1, NR3C1, CARF, BACH1, BACH2, SNAPC5, TRPS1, NELFB, JUNB, GTF2I, ABT1, KLF11, SUPT16H, PARP1, LMO4, TCF12, SOX12, FOS, GTF2F2, ETV4, KLF15, RUNX2, ETV6, HCFC1, PLSCR1, NCOR1, NFX1, ELF4, ZNF639, SUB1, TBPL1, TFAM, CCDC169-SOHLH2, ATF4, GTF2A2, DLX2, TMF1, CBFB, PLAG1, GATA6, FOXK2, GATA2, HIF1A, MNT, NFIL3…	1934	513	16792	1.45555	0.775497	0.06494	0.0645693
GO:0016569~covalent chromatin modification	GOTERM_BP_DIRECT	27	1.17698	0.000392017	RB1, DNMT1, L3MBTL2, CHD7, NR3C1, RCBTB1, TDG, TLK2, HMG20A, ZNF304, SMARCC1, PBRM1, CBX4, C17ORF49, CBX2, TET1, DEK, ARID1B, TDRD3, RBL2, DNAJC2, NCOR1, MTF2, ANP32E, ASF1A, PHF19, ASF1B	1934	113	16792	2.07459	0.832303	0.0743852	0.0739606
GO:0031145~anaphase-promoting complex-dependent catabolic process	GOTERM_BP_DIRECT	21	0.915432	0.000487129	PSMD11, PLK1, ANAPC10, AURKB, ANAPC11, FBXO31, PSMD8, PSMA3, PSMA1, PSMB2, PSMD5, PSMC1, CDC27, CDC16, PSME4, CDK1, ANAPC4, BUB3, UBA52, MAD2L1, ANAPC2	1934	79	16792	2.30801	0.891274	0.0887353	0.0882287
GO:0006397~mRNA processing	GOTERM_BP_DIRECT	37	1.6129	0.000571865	RBM27, RBM28, RBM25, RNASEL, RBM26, CELF2, SRSF1, HNRNPR, PHRF1, IWS1, SNRNP70, PPP1R8, SAP18, KIAA1429, SMNDC1, SRSF11, SF3A3, RBM39, PTCD2, RBFOX2, ZRANB2, PAPD4, USB1, MAGOHB, LSM5, PTBP2, SRPK1, HNRNPL, RBMXL1, XRN2, FASTKD5, RBM20, CLASRP, TARDBP, NSRP1, SRSF7, SUGP2	1934	179	16792	1.79471	0.926098	0.100164	0.0995925
GO:0070126~mitochondrial translational termination	GOTERM_BP_DIRECT	22	0.959024	0.000599734	MRPS17, PTCD3, MRPS35, MRPS11, MRPS23, MRPS12, MRPL19, MRPL27, MRPS18B, MRPS21, MRPL47, MRPL36, MRPL15, MRPL21, C12ORF65, MRPL52, MRPS9, MRPL40, MRPL1, MRRF, MTRF1L, CHCHD1	1934	86	16792	2.22111	0.934912	0.101155	0.100578
GO:0016567~protein ubiquitination	GOTERM_BP_DIRECT	63	2.74629	0.000698104	CCNF, KEAP1, FBXO21, BACH1, BACH2, UBE2L3, MED17, TRIM8, ARIH1, TRIM21, MED1, ZYG11A, RNF44, TRIM62, ZER1, CISH, TRPC4AP, SIRT1, FBXW2, MED7, TRAF5, BIRC6, TRIM11, BIRC3, MYCBP2, RNF38, PELI2, UBR3, XIAP, RNF4, ANAPC11, CAND2, DCAF16, CAND1, ZNRF3, RAB40B, RNF138, FEM1C, VHL, RNF130, DCAF12, BARD1, HACE1, FEM1A, SMURF1, KLHL26, PLK1, KLHL2, WWP1, KLHL23, KLHL24, MARCH3, MIB1, ITCH, KLHL5, KLHL7, …	1934	359	16792	1.52367	0.958426	0.113542	0.112893
GO:0006406~mRNA export from nucleus	GOTERM_BP_DIRECT	24	1.04621	0.00083189	EIF5A, NUP214, NDC1, SMG1, ENY2, NUP205, NXT1, CPSF3, SRSF1, NUP153, NUP93, DDX39B, NUP85, NUP50, ZC3H11A, NUP35, SRSF3, NUP43, NUPL2, SRSF6, SRSF7, SRSF10, EIF4E, SRSF11	1934	100	16792	2.08381	0.977404	0.130635	0.12989
GO:0007077~mitotic nuclear envelope disassembly	GOTERM_BP_DIRECT	14	0.610288	0.000994452	NUP214, NDC1, NEK9, NUP205, NEK6, PLK1, NUP153, NUP93, NUP85, NUP50, CDK1, NUP35, NUP43, NUPL2	1934	44	16792	2.76262	0.98923	0.150958	0.150096
GO:0043153~entrainment of circadian clock by photoperiod	GOTERM_BP_DIRECT	9	0.392328	0.00106677	PER1, PPP1CC, MTA1, CRTC1, CRY2, USP2, CRY1, SIK1, PPP1CA	1934	20	16792	3.90714	0.992255	0.156713	0.155818
GO:0042787~protein ubiquitination involved in ubiquitin-dependent protein catabolic process	GOTERM_BP_DIRECT	32	1.39494	0.001173	UBR4, KEAP1, UBE2Z, ANAPC10, AURKB, ANAPC11, UBE2L3, RMND5A, BTBD1, HECTD2, RNF19A, CDC27, ARIH1, BUB3, HACE1, SMURF1, SIAH2, PLK1, WWP1, RNF145, ITCH, KLHL7, NEDD4, CDC16, CDK1, RNF181, ANAPC4, UBA52, CACUL1, TAF1, MAD2L1, ANAPC2	1934	153	16792	1.81595	0.995228	0.161874	0.16095
GO:0008380~RNA splicing	GOTERM_BP_DIRECT	34	1.48213	0.00116605	RBM28, RBM25, DHX8, IWS1, PPP2CA, SYNCRIP, SNRPD2, PPP2R1A, SNRNP70, RSRC1, PPP1R8, SAP18, KIAA1429, SRSF11, SF3A3, RBM39, RBFOX2, ZRANB2, PRPF4B, USB1, MAGOHB, SRPK1, LSM6, RBMXL1, DDX39B, LUC7L3, RBM20, SNRPF, HNRNPC, CLASRP, TARDBP, NSRP1, SRSF7, SUGP2	1934	166	16792	1.77835	0.995074	0.161874	0.16095
GO:0045893~positive regulation of transcription, DNA-templated	GOTERM_BP_DIRECT	83	3.61813	0.00139851	RB1, SPI1, CD80, KDM8, SETD7, HMGB2, FHL2, FOXM1, MED16, FGF2, MED17, ING5, PPP3CB, ZIC2, SOX18, CEP290, CDK5RAP2, MED1, SMARCC1, MAP2K2, NCOA3, RHOG, AXIN1, FOS, TFB2M, TGFBR1, RUNX2, CCNA2, PPM1A, DNAJC2, CCNE1, ELF4, KAT6B, TBL1XR1, KAT6A, TFAM, ZNF711, ZP3, ATF4, SP100, ENY2, RRN3, USP16, GATA6, CREBL2, FOXK1, RNF4, HIF1A, ARNTL, CAND2, SERTAD3, IRAK1, NUP85, NSD1, BLOC1S2, MAPK1, VHL, PCBD2,…	1934	515	16792	1.39932	0.998293	0.184278	0.183226
GO:0006974~cellular response to DNA damage stimulus	GOTERM_BP_DIRECT	40	1.74368	0.00141628	TOP2A, CCNK, USP16, USP10, MCM9, SETD7, RNF8, XIAP, RPS27L, SMC5, AATF, CDKN2AIP, ALKBH8, BBC3, RASSF1, HELB, TLK2, MAPK1, TOPBP1, MAPK3, BARD1, PARP4, PARP1, FANCL, DDX11, XRCC3, HUS1, CHD1L, SIRT1, FBXO31, SETX, RAD51, TAOK3, TAOK1, PSME4, TIMELESS, SPRTN, ERCC8, RAD17, TAF1	1934	208	16792	1.66972	0.998426	0.184278	0.183226
GO:0006413~translational initiation	GOTERM_BP_DIRECT	29	1.26417	0.00172729	RPL4, EIF4E3, RPL36A, RPL6, RPS15, RPS4X, RPS14, RPL7A, RPS15A, RPL36, RPL35, RPL39, EIF4E, RPS10, EIF2B3, RPS7, RPS5, RPL35A, RPL13A, RPL23A, EIF1, EIF3M, EIF6, RPS29, EIF3H, RPL28, UBA52, RPS21, RPS24	1934	137	16792	1.83791	0.999619	0.218502	0.217254
GO:0009168~purine ribonucleoside monophosphate biosynthetic process	GOTERM_BP_DIRECT	7	0.305144	0.00193063	ADSL, IMPDH1, PPAT, GMPS, GART, PFAS, ADA	1934	13	16792	4.6752	0.999849	0.237624	0.236267
GO:0006614~SRP-dependent cotranslational protein targeting to membrane	GOTERM_BP_DIRECT	22	0.959024	0.00201776	RPL4, RPS7, RPS5, RPL36A, RPL13A, RPL35A, RPL23A, RPL6, RPS15, RPS4X, RPS14, RPL7A, RPS15A, RPS29, RPL36, RPL35, RPL28, UBA52, RPS21, RPL39, RPS10, RPS24	1934	94	16792	2.03208	0.999899	0.239958	0.238588
GO:0051437~positive regulation of ubiquitin-protein ligase activity involved in regulation of mitotic cell cycle transition	GOTERM_BP_DIRECT	19	0.828248	0.00207234	PSMD11, PLK1, ANAPC10, ANAPC11, PSMD8, PSMA3, PSMA1, PSMB2, PSMD5, PSMC1, CDC27, CDC16, PSME4, CDK1, ANAPC4, BUB3, UBA52, MAD2L1, ANAPC2	1934	76	16792	2.17063	0.999921	0.239958	0.238588
GO:0006915~apoptotic process	GOTERM_BP_DIRECT	89	3.87969	0.00210767	RB1, CSRNP1, NCKAP1, STEAP3, PLEKHF1, ARL6IP1, CSE1L, PTEN, ZC3H8, GHITM, DDX41, NOC2L, NR3C1, UBE2Z, BBC3, SHF, SLK, PPP2R1A, RASSF5, CASP3, MAP3K9, IFT57, CTSC, IER3, STPG1, EIF5A, KLF11, CSNK2A1, RIPK2, CSNK2A2, AXIN1, NME3, TMEM173, TGFBR1, NISCH, DUSP22, PLSCR1, TMBIM4, SLTM, ESPL1, NOA1, TRAF5, CHMP3, BIRC6, BIRC3, MCM2, KANK2, MTFP1, XIAP, STK3, SAV1, PPP2CA, BCL2L13, MIEN1, NUAK2, PTK2B, …	1934	567	16792	1.36287	0.999933	0.239958	0.238588
GO:0000722~telomere maintenance via recombination	GOTERM_BP_DIRECT	11	0.479512	0.00236013	RFC5, POLD4, POLA1, RAD51, PCNA, LIG1, TEP1, XRCC3, SMC5, DNA2, POLE	1934	32	16792	2.98462	0.999979	0.262148	0.260651
GO:0043966~histone H3 acetylation	GOTERM_BP_DIRECT	13	0.566696	0.00263449	SPI1, BRPF1, ELP3, POLE4, ING5, PER1, TADA2A, KAT6B, KAT6A, SAP130, TADA3, POLE3, WDR5	1934	43	16792	2.62495	0.999994	0.285653	0.284023
GO:0006302~double-strand break repair	GOTERM_BP_DIRECT	17	0.741064	0.00278671	PARP3, LIG1, PARP1, DDX1, RNF8, LIG3, MND1, INO80, PARP9, BACH1, SETX, MAD2L2, MTA1, MSH2, EME2, TDP1, NBN	1934	66	16792	2.23641	0.999997	0.295132	0.293447
GO:0006396~RNA processing	GOTERM_BP_DIRECT	22	0.959024	0.00302183	RBM39, DHX8, CELF2, CSTF3, DDX20, HNRNPU, TRMT2A, TRNT1, HNRNPL, SETX, SYNCRIP, LSM7, SART3, EXOSC10, DHX33, DHX57, HNRNPF, DHX35, DHX36, XRN2, SUGP2, SUGP1	1934	97	16792	1.96923	0.999999	0.302353	0.300627
GO:0000083~regulation of transcription involved in G1/S transition of mitotic cell cycle	GOTERM_BP_DIRECT	9	0.392328	0.00302779	RB1, DHFR, KLF11, POLA1, PCNA, CCNE1, CDK1, TYMS, BACH1	1934	23	16792	3.39751	0.999999	0.302353	0.300627
GO:0006268~DNA unwinding involved in DNA replication	GOTERM_BP_DIRECT	6	0.261552	0.00307606	TOP2A, TOP2B, RAD51, HMGA1, C10ORF2, MCM2	1934	10	16792	5.20951	0.999999	0.302353	0.300627
GO:0000387~spliceosomal snRNP assembly	GOTERM_BP_DIRECT	10	0.43592	0.00312046	SART3, SNRPD2, CLNS1A, TGS1, DDX20, STRAP, GEMIN5, SNRPF, SNUPN, WDR77	1934	28	16792	3.1009	0.999999	0.302353	0.300627
GO:0070125~mitochondrial translational elongation	GOTERM_BP_DIRECT	20	0.87184	0.00320152	MRPS17, PTCD3, TSFM, MRPS35, MRPS11, MRPS23, MRPS12, MRPL19, MRPL27, MRPS18B, MRPS21, MRPL47, MRPL36, MRPL15, MRPL21, MRPL52, MRPS9, MRPL40, MRPL1, CHCHD1	1934	85	16792	2.04295	1	0.303744	0.30201
GO:1901796~regulation of signal transduction by p53 class mediator	GOTERM_BP_DIRECT	26	1.13339	0.00357948	PRKAG1, PRKAG2, NOC2L, AURKB, ING5, RBBP4, SMYD2, TOPBP1, NBN, BARD1, RFC5, SUPT16H, BRPF1, CSNK2A1, CSNK2A2, HUS1, TPX2, KAT6A, JMY, TAF4B, RAD17, DNA2, TAF4, UBA52, TAF2, TAF1	1934	124	16792	1.82053	1	0.332672	0.330773
GO:0006368~transcription elongation from RNA polymerase II promoter	GOTERM_BP_DIRECT	20	0.87184	0.00367559	CCNK, GTF2A2, ENY2, SUPT16H, CCNT2, ELL, GTF2B, ELP3, RTF1, GTF2F2, CDK7, POLR2A, ERCC3, ERCC2, TCEA1, TAF4B, NELFB, TAF4, TAF2, TAF1	1934	86	16792	2.01919	1	0.334589	0.332679
GO:0006283~transcription-coupled nucleotide-excision repair	GOTERM_BP_DIRECT	18	0.784656	0.00382052	RFC5, AQR, PCNA, LIG1, XPA, LIG3, PRPF19, POLD4, COPS3, COPS6, CDK7, POLR2A, ERCC3, UVSSA, ERCC2, TCEA1, ERCC8, UBA52	1934	74	16792	2.11197	1	0.334589	0.332679
GO:0000724~double-strand break repair via homologous recombination	GOTERM_BP_DIRECT	18	0.784656	0.00382052	GEN1, WDR48, PARP1, MCM9, XRCC3, HUS1, SMC5, NUCKS1, LIG3, INO80, RAD51B, ZFYVE26, RAD51, SLX4, RNF138, MEIOB, RAD54L, NBN	1934	74	16792	2.11197	1	0.334589	0.332679
GO:0075733~intracellular transport of virus	GOTERM_BP_DIRECT	14	0.610288	0.0042415	NUP214, NDC1, NUP205, NUP153, VPS37A, NUP93, NUP85, NUP50, NUP35, KPNA4, NUP43, NUPL2, KPNA2, UBA52	1934	51	16792	2.38344	1	0.364449	0.362368
GO:0000122~negative regulation of transcription from RNA polymerase II promoter	GOTERM_BP_DIRECT	107	4.66434	0.00441742	RB1, TCERG1, SPI1, WWC2, ZBTB20, NOC2L, BACH1, BACH2, RPS14, ZFP36, SOX18, SAP130, ZNF567, TRIM27, JUNB, ZNF564, MED1, HES6, USP2, SAP30, HCFC1, EID2, TBL1XR1, ERF, TIMELESS, ATF7, UBA52, DLX2, DNMT1, CTBP2, TCF7, MEPCE, GATA6, RTF1, GATA2, HIVEP1, SMYD2, SUDS3, ESRRA, WNT10B, EGR1, SMAD4, UBE2I, CBX4, CBX2, PLK1, NFXL1, NR1D1, ESR2, NR4A2, MLXIPL, DLG1, SP3, ID1, SNAI1, PKIG, RCOR3, ZNF136, CC2D…	1934	720	16792	1.29032	1	0.372536	0.370409
GO:0006298~mismatch repair	GOTERM_BP_DIRECT	11	0.479512	0.00487155	MSH6, POLD4, PCNA, MSH2, LIG1, TDG, MSH5, PMS2, PMS1, MLH3, MUTYH	1934	35	16792	2.72879	1	0.403364	0.401061
GO:0033234~negative regulation of protein sumoylation	GOTERM_BP_DIRECT	6	0.261552	0.00510806	GNL3L, HMG20B, CTNNB1, HMG20A, PARK7, RNF4	1934	11	16792	4.73592	1	0.415395	0.413023
GO:0007094~mitotic spindle assembly checkpoint	GOTERM_BP_DIRECT	8	0.348736	0.00528146	MAD2L2, ZW10, PLK1, ZNF207, BUB3, PSMG2, BUB1, MAD2L1	1934	20	16792	3.47301	1	0.421961	0.419552
GO:0042273~ribosomal large subunit biogenesis	GOTERM_BP_DIRECT	9	0.392328	0.00541632	EBNA1BP2, NOP16, NIP7, RRS1, RPL35A, SDAD1, NOC2L, WDR12, ORAOV1	1934	25	16792	3.12571	1	0.425274	0.422846
GO:0007264~small GTPase mediated signal transduction	GOTERM_BP_DIRECT	43	1.87446	0.00573303	DOCK6, ARF3, RGS19, RAB3D, DOCK8, ARHGAP1, ARL1, CHM, AGAP1, HACD3, DNAJC27, RASGRP4, RAB22A, RASGRP3, ARFRP1, RHOT2, RAB40B, YWHAQ, ARL13B, RAB26, RAB24, ARFIP2, RAC3, RAB8B, RALGPS2, RAB2A, RAB2B, SIAH2, RHOG, ARL2-SNX15, RHOA, VAV2, RAP2C, ARHGAP33, DNAJA3, RAB35, KRAS, DOCK2, RAB5A, SOS2, RHOQ, ARF5, RABL6	1934	246	16792	1.51768	1	0.43823	0.435728
GO:0051436~negative regulation of ubiquitin-protein ligase activity involved in mitotic cell cycle	GOTERM_BP_DIRECT	17	0.741064	0.00600416	PSMD11, ANAPC10, ANAPC11, PSMD8, PSMA3, PSMA1, PSMB2, PSMD5, PSMC1, CDC27, CDC16, CDK1, ANAPC4, BUB3, UBA52, MAD2L1, ANAPC2	1934	71	16792	2.07891	1	0.43823	0.435728
GO:0045727~positive regulation of translation	GOTERM_BP_DIRECT	14	0.610288	0.00602681	DDX3X, FAM129A, RPS27L, UPF3A, LARP4B, RPS4X, QARS, EIF6, DDX39B, CDK4, GUF1, PTK2B, MAPK1, MAPK3	1934	53	16792	2.2935	1	0.43823	0.435728
GO:0090307~mitotic spindle assembly	GOTERM_BP_DIRECT	11	0.479512	0.00606247	GOLGA2, TPX2, FAM175B, TUBGCP5, ZNF207, XIAP, NEK2, KIF11, RHOA, MZT1, BIRC3	1934	36	16792	2.65299	1	0.43823	0.435728
GO:0032543~mitochondrial translation	GOTERM_BP_DIRECT	11	0.479512	0.00606247	PTCD3, MRPS17, NOA1, MRPS11, MRPS12, GATC, MRPS18B, MRPS21, MRPL47, HARS, CHCHD1	1934	36	16792	2.65299	1	0.43823	0.435728
GO:0045944~positive regulation of transcription from RNA polymerase II promoter	GOTERM_BP_DIRECT	139	6.05929	0.00667313	RB1, ATF1, CCNK, SPI1, CCNT2, CRTC1, CD81, CCNC, NUCKS1, PARK7, NR3C1, BACH1, FGF2, RPS6KA4, MCIDAS, SOX18, NFATC2IP, CCNL2, ZNF567, JUNB, ZNF564, MED1, SMARCC1, SLC30A9, LMO4, SOX12, HCFC1, TBL1XR1, KAT6B, NCL, SUB1, RBM14-RBM4, TFAM, MAML3, UBA52, ATF4, DLX2, CBFB, CTBP2, GATA6, RTF1, GATA2, HIF1A, ATXN7, DHX36, SOHLH2, CAMTA2, RPRD1B, ZNF304, BCL9L, ESRRA, STAT5B, EGR1, SMAD4, HMGA1, INO80, SE…	1934	981	16792	1.23025	1	0.460446	0.457817
GO:0033617~mitochondrial respiratory chain complex IV assembly	GOTERM_BP_DIRECT	7	0.305144	0.00664455	CHCHD5, COX19, SCO1, COX14, SMIM20, PET117, COX20	1934	16	16792	3.7986	1	0.460446	0.457817
GO:0045892~negative regulation of transcription, DNA-templated	GOTERM_BP_DIRECT	77	3.35658	0.00651249	RB1, CREBZF, KDM5B, KDM5C, SPI1, LDB1, YWHAB, HMGB2, FHL2, ZC3H8, UBP1, FOXM1, C14ORF169, HEY1, YWHAQ, ZIC2, SOX18, ZNF280B, NELFB, ZNF488, KLF11, RBM15, RBFOX2, RING1, ZNF282, ZNF12, ZBTB33, CBFA2T2, SIRT1, RUNX2, EREG, GCFC2, EID2, ZNF91, KAT6B, ZNF639, THAP7, KAT6A, CRY2, ZNF438, TIMELESS, DEPDC1, CRY1, ZP3, TRIM11, SP100, CTBP2, GATA6, FOXK1, ZNF24, STRN3, ARNTL, NACC1, ZNF746, SUDS3, SNX6, T…	1934	499	16792	1.33979	1	0.460446	0.457817
GO:0000086~G2/M transition of mitotic cell cycle	GOTERM_BP_DIRECT	27	1.17698	0.00693415	YWHAE, KDM8, FOXM1, PPP2R1A, CEP72, NEK2, CEP192, CEP290, CDK5RAP2, PLK4, WNT10B, PPP1R12A, BORA, NDE1, TUBB, PLK1, CSNK1D, TUBB4B, CDC25C, HAUS2, TPX2, CDK7, ALMS1, CDK1, UBA52, CALM2, TAF2	1934	137	16792	1.71115	1	0.471315	0.468624
GO:0006357~regulation of transcription from RNA polymerase II promoter	GOTERM_BP_DIRECT	69	3.00785	0.00727501	RB1, ATF1, GMEB2, HMGB2, FHL2, UBP1, NUCKS1, MED16, TTF1, MED17, ZMYM2, NFKBIZ, JUNB, MNX1, GTF2I, ABT1, TEAD4, ZNF18, SMARCC1, TCF12, ACTL6A, WDR75, MED9, SOX12, FOS, RUNX2, MED7, WDR77, RBL2, MED23, SLTM, RFX7, SUB1, DGKQ, ZNF710, BLZF1, ATF4, ENY2, USP16, CBFB, ZNF518B, TCF7, FOXK2, FOXK1, ATXN7, HSF2, SAFB2, SAP18, CAMTA2, ZBED4, TBX1, TCF7L2, ZNF143, STAT5B, FOXJ3, ELP3, DEK, ELP6, MED13L, M…	1934	441	16792	1.35849	1	0.487212	0.48443
GO:0043248~proteasome assembly	GOTERM_BP_DIRECT	6	0.261552	0.00793435	PSMD8, PSMD11, PSMD5, KIAA0368, PSMG4, PSMG2	1934	12	16792	4.34126	1	0.508916	0.50601
GO:0032228~regulation of synaptic transmission, GABAergic	GOTERM_BP_DIRECT	6	0.261552	0.00793435	NISCH, USP46, PLCL1, PTEN, NF1, KRAS	1934	12	16792	4.34126	1	0.508916	0.50601
GO:0032211~negative regulation of telomere maintenance via telomerase	GOTERM_BP_DIRECT	6	0.261552	0.00793435	PIF1, GNL3L, PINX1, HNRNPU, NAT10, HNRNPC	1934	12	16792	4.34126	1	0.508916	0.50601
GO:0007093~mitotic cell cycle checkpoint	GOTERM_BP_DIRECT	10	0.43592	0.00830061	RB1, DLG1, ZW10, HUS1, RAD17, NBN, SMC1A, BUB1, MAD2L1, BCL2L1	1934	32	16792	2.71329	1	0.514268	0.511332
GO:0006409~tRNA export from nucleus	GOTERM_BP_DIRECT	10	0.43592	0.00830061	NUP214, NUP93, NDC1, NUP205, NUP85, NUP50, NUP35, NUP153, NUP43, NUPL2	1934	32	16792	2.71329	1	0.514268	0.511332
GO:0000467~exonucleolytic trimming to generate mature 3'-end of 5.8S rRNA from tricistronic rRNA transcript (SSU-rRNA, 5.8S rRNA, LSU-rRNA)	GOTERM_BP_DIRECT	5	0.21796	0.00835657	EXOSC7, ERI2, ERI3, EXOSC8, EXOSC2	1934	8	16792	5.42658	1	0.514268	0.511332
GO:0010800~positive regulation of peptidyl-threonine phosphorylation	GOTERM_BP_DIRECT	9	0.392328	0.00902347	RIPK2, SPHK1, PLK1, AXIN1, MAPK1, PRKAG2, S1PR2, CALM2, UBE2K	1934	27	16792	2.89417	1	0.533674	0.530627
GO:0035329~hippo signaling	GOTERM_BP_DIRECT	9	0.392328	0.00902347	TJP1, YWHAE, TEAD4, MOB1A, LATS2, YWHAB, CASP3, STK3, SAV1	1934	27	16792	2.89417	1	0.533674	0.530627
GO:0051225~spindle assembly	GOTERM_BP_DIRECT	9	0.392328	0.00902347	GOLGA2, NCOR1, TUBB, NEK6, CEP192, CSNK1D, NEK2, INO80, HAUS2	1934	27	16792	2.89417	1	0.533674	0.530627
GO:0043123~positive regulation of I-kappaB kinase/NF-kappaB signaling	GOTERM_BP_DIRECT	30	1.30776	0.00950798	ANKRD17, RNF31, TRAF3IP2, PELI2, TRIM8, IRAK1, TFG, TRIM62, UBE2I, CHUK, RIPK2, NEK6, CARD9, TNFRSF10B, RHOA, PPM1A, MAVS, VAPA, EEF1D, TRAF5, C18ORF32, TRIM13, CTNNB1, TAB2, LTBR, UBA52, MAP3K14, MYD88, CC2D1A, BIRC3	1934	161	16792	1.61786	1	0.55512	0.551951
GO:0019827~stem cell population maintenance	GOTERM_BP_DIRECT	13	0.566696	0.00977301	ZCCHC11, SETD6, TET1, RTF1, SMC1A, MED17, MED7, TRIM8, EIF4ENIF1, MTF2, CTNNB1, EIF4E, PHF19	1934	50	16792	2.25746	1	0.563371	0.560154
GO:0010827~regulation of glucose transport	GOTERM_BP_DIRECT	10	0.43592	0.0102726	NUP214, NUP93, NDC1, NUP205, NUP85, NUP50, NUP35, NUP153, NUP43, NUPL2	1934	33	16792	2.63107	1	0.577546	0.574249
GO:0009060~aerobic respiration	GOTERM_BP_DIRECT	10	0.43592	0.0102726	OXA1L, CHCHD5, COX19, ADSL, UQCRB, COX11, UQCRC2, FXN, COX10, COX20	1934	33	16792	2.63107	1	0.577546	0.574249
GO:0008283~cell proliferation	GOTERM_BP_DIRECT	58	2.52833	0.0108121	DAZAP1, ZAK, CD81, CSE1L, PAK1IP1, PTEN, DDX41, DNPH1, CYR61, UBE2L3, FRAT2, CDC27, ANXA7, NBN, TRIM27, DLGAP5, IL15RA, IGFBP4, ENTPD5, MATK, CDC25C, GNL3, DUSP22, BLZF1, DTYMK, RRN3, PCNA, TYMS, RASGRP4, AURKB, PURB, HLCS, PPP1R8, EPS15, BUB1, CD276, TBX1, TCF7L2, SMAD4, H3F3B, PLK1, RPL23A, PA2G4, WDR12, POLA1, TPX2, BOP1, GOLPH3, CDK7, NASP, ERCC2, CDC16, CDK1, PEMT, POLR3G, CKLF, BCAR1, BCL2L1	1934	366	16792	1.37592	1	0.600469	0.597041
GO:0045931~positive regulation of mitotic cell cycle	GOTERM_BP_DIRECT	9	0.392328	0.0113847	STAT5B, POLDIP2, SPHK1, USP22, USP2, CDK1, EIF4EBP1, PTPN11, EIF4E	1934	28	16792	2.79081	1	0.624648	0.621082
GO:0000082~G1/S transition of mitotic cell cycle	GOTERM_BP_DIRECT	21	0.915432	0.0116441	RB1, PCNA, TYMS, GSPT1, DHFR, POLA1, CDK7, ORC6, LATS2, CCNE2, CCNE1, CDK4, PPAT, CDK1, EIF4EBP1, CRLF3, CAMK2G, POLE, EIF4E, CACUL1, MCM2	1934	102	16792	1.78758	1	0.626131	0.622556
GO:0097284~hepatocyte apoptotic process	GOTERM_BP_DIRECT	6	0.261552	0.0116867	RB1, MTCH2, KRT18, KRT8, STK3, BCL2L1	1934	13	16792	4.00732	1	0.626131	0.622556
GO:0042127~regulation of cell proliferation	GOTERM_BP_DIRECT	33	1.43854	0.0120692	DNMT1, TCF7, HP1BP3, XIAP, FOXM1, SAT1, SAV1, PLAU, PTK2B, EPS15, JUNB, JAG2, ESRRA, IL4R, RBFOX2, FANCL, FANCA, TNFRSF10B, TNFRSF10A, BRAF, TNFRSF1B, SIRT1, PTK2, GNL3, DUSP22, EID2, TRNP1, TIMELESS, BIRC6, SGK3, LTBR, ARHGEF2, PLCD3	1934	185	16792	1.54877	1	0.639108	0.63546
GO:0051439~regulation of ubiquitin-protein ligase activity involved in mitotic cell cycle	GOTERM_BP_DIRECT	8	0.348736	0.0122718	CDC16, PLK1, CDC27, CDK1, ANAPC4, ANAPC10, ANAPC11, ANAPC2	1934	23	16792	3.02001	1	0.642364	0.638696
GO:0006310~DNA recombination	GOTERM_BP_DIRECT	18	0.784656	0.0125534	RPAIN, PIF1, PAXIP1, ENDOG, LIG1, ACTL6A, XRCC3, HMGB3, LIG3, BACH1, UCHL5, RAD51B, SETX, RAD51, NSMCE4A, THAP9, RBM14-RBM4, RAD54L	1934	83	16792	1.88296	1	0.64964	0.645931
GO:0070940~dephosphorylation of RNA polymerase II C-terminal domain	GOTERM_BP_DIRECT	4	0.174368	0.0127272	SSU72, RPRD1B, RPRD1A, RPAP2	1934	5	16792	6.94602	1	0.651233	0.647515
GO:0007062~sister chromatid cohesion	GOTERM_BP_DIRECT	21	0.915432	0.0129312	NDE1, RCC2, DDX11, PLK1, SMC5, PDS5A, SMC1A, AURKB, PPP1CC, DSN1, CENPH, INCENP, NUP85, TAOK1, ZW10, CENPK, NUP43, BUB3, CENPO, BUB1, MAD2L1	1934	103	16792	1.77022	1	0.654319	0.650583
GO:0050684~regulation of mRNA processing	GOTERM_BP_DIRECT	5	0.21796	0.0136829	PTCD2, SLTM, SAFB2, IWS1, SRPK1	1934	9	16792	4.82362	1	0.677306	0.673439
GO:0035308~negative regulation of protein dephosphorylation	GOTERM_BP_DIRECT	5	0.21796	0.0136829	PPP1R16B, IGBP1, YWHAE, YWHAB, PPP1R8	1934	9	16792	4.82362	1	0.677306	0.673439
GO:0006457~protein folding	GOTERM_BP_DIRECT	32	1.39494	0.0141396	CWC27, HSPBP1, LMAN1, GANAB, GRPEL2, SACS, CDC37L1, QSOX2, SIL1, PDIA3, PDIA2, TRAP1, PPIL2, CSNK2A1, VBP1, SPHK1, CSNK2A2, TBCC, PDIA5, PDCL3, DNAJC1, TMX4, TMX1, DNAJA3, DNAJC4, GNB4, FKBP7, PFDN1, PPIH, PPIL4, PPIA, FKBP5	1934	180	16792	1.54356	1	0.68656	0.682641
GO:0006754~ATP biosynthetic process	GOTERM_BP_DIRECT	9	0.392328	0.0141714	PRKAG2, ATP5H, ALDOA, ATP5F1, ATP5G2, GBAS, ATP5O, SLC25A13, ATP5L	1934	29	16792	2.69458	1	0.68656	0.682641
GO:0006367~transcription initiation from RNA polymerase II promoter	GOTERM_BP_DIRECT	28	1.22058	0.0143455	GTF2A2, GTF2B, CCNC, NR3C1, MED16, NR2C1, MED17, POLR2A, E2F2, GTF2I, TEAD4, ESRRA, MED1, NR1D1, GTF2F2, ESR2, MED7, NR4A2, MED23, NR4A1, CDK7, ERCC3, ERCC2, TAF4B, MAML3, TAF4, TAF2, TAF1	1934	152	16792	1.59941	1	0.687676	0.68375
GO:0000731~DNA synthesis involved in DNA repair	GOTERM_BP_DIRECT	10	0.43592	0.0152439	RAD51B, BARD1, POLD4, POLA1, RAD51, XRCC3, DNA2, NBN, POLE, SIRT1	1934	35	16792	2.48072	1	0.723131	0.719003
GO:0007088~regulation of mitotic nuclear division	GOTERM_BP_DIRECT	8	0.348736	0.0156409	BORA, CAV2, CCDC8, CDC16, PDXP, NEK2, KIF20B, CDC25C	1934	24	16792	2.89417	1	0.734318	0.730125
GO:0006998~nuclear envelope organization	GOTERM_BP_DIRECT	7	0.305144	0.0166462	NUP93, SUN2, TOR1A, REEP4, SPAG4, LEMD2, ZMPSTE24	1934	19	16792	3.19882	1	0.77354	0.769124
GO:0006611~protein export from nucleus	GOTERM_BP_DIRECT	9	0.392328	0.017423	EIF5A, NUP214, NXT1, SMURF1, STRADA, CSE1L, STRADB, XPO5, NUPL2	1934	30	16792	2.60476	1	0.801459	0.796884
GO:0098609~cell-cell adhesion	GOTERM_BP_DIRECT	44	1.91805	0.0181267	YWHAE, DDX3X, YWHAB, ARHGAP1, OLA1, CAPG, PARK7, BZW2, CLINT1, RPL6, PDLIM1, GOLGA2, SEPT9, RPL7A, SLK, TNKS1BP1, STX5, ARFIP2, PAK2, EPS15, WASF2, ZC3H15, NOP56, VASP, STAT1, RPL23A, CSNK1D, YWHAZ, SEPT2, HCFC1, EPN2, TJP1, RSL1D1, KRT18, EHD4, VAPA, STK24, EEF1D, SERBP1, EXOC3, PLIN3, ALDOA, CC2D1A, PFKP	1934	271	16792	1.40971	1	0.821701	0.81701
GO:0042254~ribosome biogenesis	GOTERM_BP_DIRECT	10	0.43592	0.0183043	RPL7A, BOP1, GNL3L, RRN3, NOA1, NVL, MRPL36, AATF, C14ORF169, GNL3	1934	36	16792	2.41181	1	0.821701	0.81701
GO:0010467~gene expression	GOTERM_BP_DIRECT	12	0.523104	0.0184044	HNRNPL, GOLPH3, HNRNPA3, POLR2A, ZBTB25, HNRNPF, HNRNPU, HNRNPR, IGF2BP2, HNRNPC, GTF2F2, RBMX	1934	48	16792	2.17063	1	0.821701	0.81701
GO:0000209~protein polyubiquitination	GOTERM_BP_DIRECT	32	1.39494	0.0189472	RNF31, PSMD11, CBFB, PRPF19, UBE2L3, PSMD8, ZNRF1, HECTD2, PSMB2, PSMD5, RNF138, RNF19A, ARIH1, TRIM21, PPIL2, SMURF1, SIAH2, LNPEP, RNF41, DDB2, FBXO31, RNF145, PSMA3, PSMA1, PSMC1, PSME4, RLIM, ERCC8, RNF181, BLMH, UBA52, TAF1	1934	184	16792	1.51	1	0.837724	0.832941
GO:0051090~regulation of sequence-specific DNA binding transcription factor activity	GOTERM_BP_DIRECT	8	0.348736	0.0196172	CREBZF, MAPK9, FANCD2, FANCA, MAPK1, SGK3, FOS, MAPK3	1934	25	16792	2.77841	1	0.857888	0.85299
GO:0032092~positive regulation of protein binding	GOTERM_BP_DIRECT	14	0.610288	0.01978	TCF7L2, ACE, PLXND1, HFE, USP33, HIP1R, TMEM173, SPPL3, STK3, ADD2, BAMBI, FLOT1, CTHRC1, TAF1	1934	61	16792	1.99271	1	0.857888	0.85299
GO:0051103~DNA ligation involved in DNA repair	GOTERM_BP_DIRECT	5	0.21796	0.0207542	PARP3, LIG1, PARP1, HMGB2, LIG3	1934	10	16792	4.34126	1	0.867107	0.862156
GO:0046621~negative regulation of organ growth	GOTERM_BP_DIRECT	5	0.21796	0.0207542	WWC2, PTEN, FXN, PTK2, STK3	1934	10	16792	4.34126	1	0.867107	0.862156
GO:0031023~microtubule organizing center organization	GOTERM_BP_DIRECT	5	0.21796	0.0207542	GCC2, ARPC5, HAUS2, WDR43, CDK5RAP2	1934	10	16792	4.34126	1	0.867107	0.862156
GO:0090502~RNA phosphodiester bond hydrolysis, endonucleolytic	GOTERM_BP_DIRECT	13	0.566696	0.0206408	CPSF4, RNASEH2C, RNASEH2B, RNASEL, POP7, CPSF3, RNASET2, PLD6, KIAA0391, ERN1, NOB1, LACTB2, RPP21	1934	55	16792	2.05223	1	0.867107	0.862156
GO:2000323~negative regulation of glucocorticoid receptor signaling pathway	GOTERM_BP_DIRECT	4	0.174368	0.0232875	PER1, CRY2, CRY1, ARNTL	1934	6	16792	5.78835	1	0.869273	0.86431
GO:0042796~snRNA transcription from RNA polymerase III promoter	GOTERM_BP_DIRECT	4	0.174368	0.0232875	ELL, ICE1, ICE2, ZC3H8	1934	6	16792	5.78835	1	0.869273	0.86431
GO:0046134~pyrimidine nucleoside biosynthetic process	GOTERM_BP_DIRECT	4	0.174368	0.0232875	CAD, TYMS, UMPS, DHODH	1934	6	16792	5.78835	1	0.869273	0.86431
GO:0071035~nuclear polyadenylation-dependent rRNA catabolic process	GOTERM_BP_DIRECT	4	0.174368	0.0232875	EXOSC7, EXOSC10, EXOSC8, EXOSC2	1934	6	16792	5.78835	1	0.869273	0.86431
GO:0006189~'de novo' IMP biosynthetic process	GOTERM_BP_DIRECT	4	0.174368	0.0232875	ADSL, PPAT, GART, PFAS	1934	6	16792	5.78835	1	0.869273	0.86431
GO:0006650~glycerophospholipid metabolic process	GOTERM_BP_DIRECT	4	0.174368	0.0232875	GNPAT, PGP, PEMT, PIP5K1A	1934	6	16792	5.78835	1	0.869273	0.86431
GO:0045842~positive regulation of mitotic metaphase/anaphase transition	GOTERM_BP_DIRECT	4	0.174368	0.0232875	RB1, ESPL1, DLGAP5, ANAPC11	1934	6	16792	5.78835	1	0.869273	0.86431
GO:0032873~negative regulation of stress-activated MAPK cascade	GOTERM_BP_DIRECT	4	0.174368	0.0232875	IGBP1, GSTP1, PBK, FOXM1	1934	6	16792	5.78835	1	0.869273	0.86431
GO:1900034~regulation of cellular response to heat	GOTERM_BP_DIRECT	16	0.697472	0.0224749	YWHAE, NUP214, NDC1, NUP205, NUP153, SIRT1, NUP93, DNAJC2, NUP85, NUP50, NUP35, MAPK1, NUP43, NUPL2, CAMK2G, MAPK3	1934	75	16792	1.85227	1	0.869273	0.86431
GO:0048026~positive regulation of mRNA splicing, via spliceosome	GOTERM_BP_DIRECT	6	0.261552	0.0224283	DAZAP1, SNRNP70, TRA2B, LMNTD2, PRPF19, RBMX	1934	15	16792	3.47301	1	0.869273	0.86431
GO:0006296~nucleotide-excision repair, DNA incision, 5'-to lesion	GOTERM_BP_DIRECT	10	0.43592	0.0217874	RFC5, POLD4, PCNA, ERCC3, PARP1, ERCC2, XPA, CHD1L, UBA52, DDB2	1934	37	16792	2.34663	1	0.869273	0.86431
GO:0036297~interstrand cross-link repair	GOTERM_BP_DIRECT	12	0.523104	0.021337	RAD51, SLX4, DCLRE1C, FANCL, FANCD2, XRCC3, RNF8, USP1, FANCA, NUCKS1, FANCE, UBA52	1934	49	16792	2.12633	1	0.869273	0.86431
GO:0006273~lagging strand elongation	GOTERM_BP_DIRECT	4	0.174368	0.0232875	POLA1, PARP3, PARP1, LIG3	1934	6	16792	5.78835	1	0.869273	0.86431
GO:0016192~vesicle-mediated transport	GOTERM_BP_DIRECT	27	1.17698	0.0250025	CLTB, CLINT1, AP3M2, GGA2, GGA3, AP1G1, AP1S2, TRAPPC12, TRAPPC11, STX5, CPNE3, AP3S1, VPS39, TVP23C-CDRT4, RAB2B, JAGN1, VPS33A, ARFGAP3, TRIP10, SPIRE1, PLIN3, COPG1, TSNARE1, VAMP4, SFT2D2, BLZF1, MON1B	1934	152	16792	1.54229	1	0.906152	0.900979
GO:0043488~regulation of mRNA stability	GOTERM_BP_DIRECT	20	0.87184	0.0251149	NUP214, RNASEL, PSMD11, YWHAB, DIS3, SAMD4B, YWHAZ, EXOSC7, PSMD8, ZFP36, PSMA3, PSMA1, PSMB2, PSMD5, PSMC1, EXOSC8, SERBP1, PSME4, EXOSC2, UBA52	1934	103	16792	1.68593	1	0.906152	0.900979
GO:0032508~DNA duplex unwinding	GOTERM_BP_DIRECT	11	0.479512	0.0253545	SETX, PIF1, HELB, DDX3X, DDX1, DDX11, DDX12P, GINS4, DNA2, INO80, NBN	1934	44	16792	2.17063	1	0.906152	0.900979
GO:0010501~RNA secondary structure unwinding	GOTERM_BP_DIRECT	11	0.479512	0.0253545	DDX3X, DDX24, DDX39B, AGO4, DDX1, AGO1, DHX36, DDX20, DDX42, DDX10, DDX41	1934	44	16792	2.17063	1	0.906152	0.900979
GO:0009306~protein secretion	GOTERM_BP_DIRECT	9	0.392328	0.0254694	GOLPH3, STEAP3, TMEM167B, GNAS, PREB, ARFGAP3, RAB8B, LMF1, TVP23C-CDRT4	1934	32	16792	2.44196	1	0.906152	0.900979
GO:0070911~global genome nucleotide-excision repair	GOTERM_BP_DIRECT	9	0.392328	0.0254694	UBE2I, ERCC3, PARP1, ERCC2, USP45, XPA, CHD1L, UBA52, DDB2	1934	32	16792	2.44196	1	0.906152	0.900979
GO:0033683~nucleotide-excision repair, DNA incision	GOTERM_BP_DIRECT	10	0.43592	0.025721	RFC5, POLD4, PCNA, ERCC3, PARP1, ERCC2, XPA, CHD1L, UBA52, DDB2	1934	38	16792	2.28487	1	0.908011	0.902827
GO:0032091~negative regulation of protein binding	GOTERM_BP_DIRECT	13	0.566696	0.0268696	ACE, USP33, DDX11, CTNNBIP1, PARK7, PEX14, AURKB, PPP1CA, GOLGA2, GNL3L, TDG, ADNP, CAMK1	1934	57	16792	1.98022	1	0.934077	0.928744
GO:0032922~circadian regulation of gene expression	GOTERM_BP_DIRECT	13	0.566696	0.0268696	USP2, HNRNPU, CSNK1D, NR1D1, SIRT1, ARNTL, PPP1CA, PER1, PPP1CC, MTA1, CRY2, CRY1, ATF4	1934	57	16792	1.98022	1	0.934077	0.928744
GO:0030512~negative regulation of transforming growth factor beta receptor signaling pathway	GOTERM_BP_DIRECT	14	0.610288	0.0286611	FAM89B, SMURF1, CAV2, SIRT1, TGFBR1, PBLD, TGFBR3, PPM1A, EID2, BAMBI, STRAP, UBA52, SNX6, BCL9L	1934	64	16792	1.8993	1	0.972401	0.96685
GO:0070979~protein K11-linked ubiquitination	GOTERM_BP_DIRECT	8	0.348736	0.0295767	CDC16, CDC27, ANAPC4, RNF4, ANAPC10, UBE2L3, ANAPC11, ANAPC2	1934	27	16792	2.5726	1	0.972401	0.96685
GO:0032728~positive regulation of interferon-beta production	GOTERM_BP_DIRECT	8	0.348736	0.0295767	MAVS, DDX3X, RIPK2, POLR3D, FLOT1, HMGB2, ZBTB20, POLR3G	1934	27	16792	2.5726	1	0.972401	0.96685
GO:0043001~Golgi to plasma membrane protein transport	GOTERM_BP_DIRECT	8	0.348736	0.0295767	ARFRP1, GOLPH3, SYS1, RAB26, GCC2, ANK3, VAMP4, BLZF1	1934	27	16792	2.5726	1	0.972401	0.96685
GO:0042274~ribosomal small subunit biogenesis	GOTERM_BP_DIRECT	6	0.261552	0.0296027	RPS15, LTV1, EMG1, RPS7, NAT10, RPS24	1934	16	16792	3.25595	1	0.972401	0.96685
GO:1902187~negative regulation of viral release from host cell	GOTERM_BP_DIRECT	6	0.261552	0.0296027	TRIM8, TRIM13, CHMP3, TRIM27, TRIM21, TRIM11	1934	16	16792	3.25595	1	0.972401	0.96685
GO:0006275~regulation of DNA replication	GOTERM_BP_DIRECT	6	0.261552	0.0296027	ANKRD17, PPP2CA, PCNA, MCIDAS, PPP2R1A, NUCKS1	1934	16	16792	3.25595	1	0.972401	0.96685
GO:0033120~positive regulation of RNA splicing	GOTERM_BP_DIRECT	5	0.21796	0.0296949	ERN1, SETX, POLR2A, SRSF1, RBM20	1934	11	16792	3.9466	1	0.972401	0.96685
GO:0006470~protein dephosphorylation	GOTERM_BP_DIRECT	23	1.00262	0.0301052	PTPN18, MTMR2, PPP1R12A, STYX, PTEN, PDXP, PTPN21, PPP2R3A, PTPN12, CPPED1, CDC14B, PPP1CA, PPP2CA, DUSP22, PPM1A, PPP1CC, DLG1, PPP3CB, PPP4R1, PPP2R1A, CAMK2G, DLGAP5, ILKAP	1934	126	16792	1.58491	1	0.972401	0.96685
GO:0051091~positive regulation of sequence-specific DNA binding transcription factor activity	GOTERM_BP_DIRECT	20	0.87184	0.0301073	WNT10B, GTF2A2, SP100, TRIM62, PTEN, PARK7, PPRC1, ESR2, STK3, SAV1, RNF41, TRIM8, MAVS, ZIC2, JMY, TRAF5, CTNNB1, TRIM27, TRIM21, MBTPS2	1934	105	16792	1.65381	1	0.972401	0.96685
GO:0015031~protein transport	GOTERM_BP_DIRECT	59	2.57193	0.0306582	ARF3, DENND1B, RAB3D, SNX12, MIA3, RAB22A, EIF4ENIF1, CHMP1B, TMED3, CCDC53, CEP290, BBS5, NDC1, RAB2A, RAB2B, JAGN1, VPS33A, COG2, ATG10, VPS37A, COMMD1, SCAMP1, ARFGAP1, RUFY1, RINT1, ZW10, RAB35, UNC50, EXOC4, CHMP3, EXOC3, AAGAB, KDELR3, SFT2D2, ARF5, ENY2, COX18, EIF5A2, TIMM13, AGAP1, ABCB9, SDAD1, LMAN1, SCFD1, VPS51, RAB24, VPS54, NUP43, EPS15, SEC31A, ANKRD27, SEC16A, ARCN1, TIMM10B, ARH…	1934	395	16792	1.29688	1	0.983222	0.977608
GO:0033314~mitotic DNA replication checkpoint	GOTERM_BP_DIRECT	4	0.174368	0.0751736	HUS1, RAD17, TOPBP1, NAE1	1934	9	16792	3.8589	1	1	0.994509
GO:0008608~attachment of spindle microtubules to kinetochore	GOTERM_BP_DIRECT	4	0.174368	0.0751736	FAM175B, ZNF207, BUB3, AURKB	1934	9	16792	3.8589	1	1	0.994509
GO:0006353~DNA-templated transcription, termination	GOTERM_BP_DIRECT	4	0.174368	0.0751736	SETX, POLR2A, XRN2, TTF1	1934	9	16792	3.8589	1	1	0.994509
GO:0006265~DNA topological change	GOTERM_BP_DIRECT	4	0.174368	0.0751736	TOP2A, TOP2B, ERCC3, HMGB2	1934	9	16792	3.8589	1	1	0.994509
GO:0000463~maturation of LSU-rRNA from tricistronic rRNA transcript (SSU-rRNA, 5.8S rRNA, LSU-rRNA)	GOTERM_BP_DIRECT	4	0.174368	0.0751736	BOP1, RPL35, RPF2, WDR12	1934	9	16792	3.8589	1	1	0.994509
GO:0016575~histone deacetylation	GOTERM_BP_DIRECT	10	0.43592	0.0760538	MTA1, MSL3P1, RBBP4, TBL1XR1, RBM14-RBM4, HMG20B, SAP18, SUDS3, SIRT1, SAP30	1934	46	16792	1.88751	1	1	0.994509
GO:0030071~regulation of mitotic metaphase/anaphase transition	GOTERM_BP_DIRECT	4	0.174368	0.0751736	NEK6, PLK1, ANAPC4, ANAPC10	1934	9	16792	3.8589	1	1	0.994509
GO:2000008~regulation of protein localization to cell surface	GOTERM_BP_DIRECT	4	0.174368	0.0751736	TOR1A, HFE, CTNNB1, RAB11FIP5	1934	9	16792	3.8589	1	1	0.994509
GO:0043065~positive regulation of apoptotic process	GOTERM_BP_DIRECT	44	1.91805	0.0760518	TOP2A, MTCH2, DDX3X, ZAK, DDX20, STK3, SAV1, APH1A, ING5, APH1B, PNMA1, SAP18, MAP3K9, SUDS3, ZNF346, IP6K2, BARD1, KLF11, WNT10B, PLEKHG2, RIPK2, HIP1R, OSGIN1, SIRT1, VAV2, DHODH, NR4A1, REST, GAL, LATS2, ERCC3, CDK4, DNAJA3, JMY, EEF1A2, NF1, CTNNB1, PDCD2, ARHGEF2, EEF1E1, UBA52, SOS2, ATF4, BCL2L1	1934	300	16792	1.27344	1	1	0.994509
GO:0006123~mitochondrial electron transport, cytochrome c to oxygen	GOTERM_BP_DIRECT	6	0.261552	0.0715198	COX7B, COX7A2L, COX6C, COX5A, COX7C, COX10	1934	20	16792	2.60476	1	1	0.994509
GO:0006596~polyamine biosynthetic process	GOTERM_BP_DIRECT	4	0.174368	0.0751736	ODC1, SAT1, PAOX, OAZ3	1934	9	16792	3.8589	1	1	0.994509
GO:0000245~spliceosomal complex assembly	GOTERM_BP_DIRECT	7	0.305144	0.0706101	GCFC2, SART3, SNRPD2, DDX39B, DDX1, PRPF19, SF3B1	1934	26	16792	2.3376	1	1	0.994509
GO:0045901~positive regulation of translational elongation	GOTERM_BP_DIRECT	3	0.130776	0.0678102	EIF5A, USP16, EIF5A2	1934	4	16792	6.51189	1	1	0.994509
GO:0016578~histone deubiquitination	GOTERM_BP_DIRECT	5	0.21796	0.0681866	ENY2, USP16, TRRAP, ATXN7, USP22	1934	14	16792	3.1009	1	1	0.994509
GO:0008611~ether lipid biosynthetic process	GOTERM_BP_DIRECT	3	0.130776	0.0678102	GNPAT, AGPS, FAR1	1934	4	16792	6.51189	1	1	0.994509
GO:0071034~CUT catabolic process	GOTERM_BP_DIRECT	3	0.130776	0.0678102	EXOSC10, DIS3, EXOSC2	1934	4	16792	6.51189	1	1	0.994509
GO:0043504~mitochondrial DNA repair	GOTERM_BP_DIRECT	3	0.130776	0.0678102	PARP1, LIG3, DNA2	1934	4	16792	6.51189	1	1	0.994509
GO:0071364~cellular response to epidermal growth factor stimulus	GOTERM_BP_DIRECT	8	0.348736	0.0778708	STAT5B, MED1, ZFP36, GSTP1, ID1, CAD, PTPN12, PDE8A	1934	33	16792	2.10485	1	1	0.994509
GO:0031936~negative regulation of chromatin silencing	GOTERM_BP_DIRECT	3	0.130776	0.0678102	ATAD2, HMGA1, ASF1A	1934	4	16792	6.51189	1	1	0.994509
GO:0046940~nucleoside monophosphate phosphorylation	GOTERM_BP_DIRECT	3	0.130776	0.0678102	DTYMK, AK4, AK6	1934	4	16792	6.51189	1	1	0.994509
GO:0033299~secretion of lysosomal enzymes	GOTERM_BP_DIRECT	3	0.130776	0.0678102	BLOC1S6, GNPTAB, NAGPA	1934	4	16792	6.51189	1	1	0.994509
GO:0090168~Golgi reassembly	GOTERM_BP_DIRECT	3	0.130776	0.0678102	PDCD10, STK25, YWHAZ	1934	4	16792	6.51189	1	1	0.994509
GO:0046602~regulation of mitotic centrosome separation	GOTERM_BP_DIRECT	3	0.130776	0.0678102	NEK2, KIF11, CEP85	1934	4	16792	6.51189	1	1	0.994509
GO:0090170~regulation of Golgi inheritance	GOTERM_BP_DIRECT	3	0.130776	0.0678102	MAP2K2, MAPK1, MAPK3	1934	4	16792	6.51189	1	1	0.994509
GO:0006235~dTTP biosynthetic process	GOTERM_BP_DIRECT	3	0.130776	0.0678102	DTYMK, TBPL1, TYMS	1934	4	16792	6.51189	1	1	0.994509
GO:0071897~DNA biosynthetic process	GOTERM_BP_DIRECT	7	0.305144	0.0706101	POLE4, LIG1, POLE3, TK2, LIG3, LIN9, TYMS	1934	26	16792	2.3376	1	1	0.994509
GO:0051297~centrosome organization	GOTERM_BP_DIRECT	8	0.348736	0.0778708	GOLGA2, CEP68, UVRAG, PPP1R12A, PLK1, BNIP2, HAUS2, CDK5RAP2	1934	33	16792	2.10485	1	1	0.994509
GO:0051123~RNA polymerase II transcriptional preinitiation complex assembly	GOTERM_BP_DIRECT	5	0.21796	0.084826	GTF2A2, TAF4B, TAF4, TAF2, TAF1	1934	15	16792	2.89417	1	1	0.994509
GO:0001889~liver development	GOTERM_BP_DIRECT	14	0.610288	0.0786584	MED1, PTCD2, RHBDD3, CAD, GATA6, AK4, TGFBR3, DDX39B, RB1CC1, SP3, NF1, KRAS, ACADM, ADA	1934	74	16792	1.64264	1	1	0.994509
GO:0033160~positive regulation of protein import into nucleus, translocation	GOTERM_BP_DIRECT	4	0.174368	0.0984962	MED1, MAVS, CDK1, TMEM173	1934	10	16792	3.47301	1	1	0.994509
GO:0001510~RNA methylation	GOTERM_BP_DIRECT	4	0.174368	0.0984962	MEPCE, BCDIN3D, TRMT2A, FTSJ1	1934	10	16792	3.47301	1	1	0.994509
GO:0045475~locomotor rhythm	GOTERM_BP_DIRECT	4	0.174368	0.0984962	MTA1, NAGLU, USP2, PTEN	1934	10	16792	3.47301	1	1	0.994509
GO:0051146~striated muscle cell differentiation	GOTERM_BP_DIRECT	4	0.174368	0.0984962	RB1, CHUK, BNIP2, KRAS	1934	10	16792	3.47301	1	1	0.994509
GO:0008535~respiratory chain complex IV assembly	GOTERM_BP_DIRECT	4	0.174368	0.0984962	SCO1, COX18, COX11, COX10	1934	10	16792	3.47301	1	1	0.994509
GO:2000145~regulation of cell motility	GOTERM_BP_DIRECT	7	0.305144	0.0950685	DIAPH1, NRG4, CD81, MEMO1, PKN1, RHOA, EREG	1934	28	16792	2.17063	1	1	0.994509
GO:0006626~protein targeting to mitochondrion	GOTERM_BP_DIRECT	8	0.348736	0.0887792	TIMM10B, TIMM13, TIMM17B, MFN2, TRNT1, TIMM10, GDAP1, TOMM5	1934	34	16792	2.04295	1	1	0.994509
GO:0035307~positive regulation of protein dephosphorylation	GOTERM_BP_DIRECT	6	0.261552	0.0853495	PPP1R16B, DLC1, SYMPK, NSMF, SPPL3, CALM2	1934	21	16792	2.48072	1	1	0.994509
GO:0006293~nucleotide-excision repair, preincision complex stabilization	GOTERM_BP_DIRECT	6	0.261552	0.0853495	ERCC3, PARP1, ERCC2, XPA, CHD1L, DDB2	1934	21	16792	2.48072	1	1	0.994509
GO:0006401~RNA catabolic process	GOTERM_BP_DIRECT	6	0.261552	0.0853495	EXOSC7, RNASEH2C, RNASEH2B, RNASET2, XRN2, PPP1R8	1934	21	16792	2.48072	1	1	0.994509
GO:0048025~negative regulation of mRNA splicing, via spliceosome	GOTERM_BP_DIRECT	6	0.261552	0.0853495	TRA2B, SAP18, SRSF6, SRSF7, SRSF10, RBMX	1934	21	16792	2.48072	1	1	0.994509
GO:0000132~establishment of mitotic spindle orientation	GOTERM_BP_DIRECT	6	0.261552	0.0853495	NUMA1, NDE1, ZW10, ARHGEF2, WDR43, CDK5RAP2	1934	21	16792	2.48072	1	1	0.994509
GO:0006091~generation of precursor metabolites and energy	GOTERM_BP_DIRECT	11	0.479512	0.0778974	PPP1R2, SLC25A3, GNPDA1, SCO1, ATPIF1, FDXR, COX6C, COX7C, PHKA2, XYLB, DHTKD1	1934	53	16792	1.80203	1	1	0.994509
GO:0007050~cell cycle arrest	GOTERM_BP_DIRECT	23	1.00262	0.08529	BARD1, RB1, TCF7L2, WNT10B, CXCL8, ZAK, STRADA, CAB39L, STRADB, PRKAG1, PRKAG2, PA2G4, TGFBR1, ERN1, PPM1A, RASSF1, CDK7, MSH2, RRAGB, JMY, MFN2, NBN, KIF20B	1934	141	16792	1.4163	1	1	0.994509
GO:0045860~positive regulation of protein kinase activity	GOTERM_BP_DIRECT	10	0.43592	0.0849198	SDC4, PRKAG1, PTK2B, PRKAG2, TAB2, ZP3, CACUL1, PTK2, CYR61, EREG	1934	47	16792	1.84735	1	1	0.994509
GO:0034389~lipid particle organization	GOTERM_BP_DIRECT	5	0.21796	0.084826	DDHD2, PTGFRN, PPIA, RAB3GAP1, PLIN5	1934	15	16792	2.89417	1	1	0.994509
GO:0007095~mitotic G2 DNA damage checkpoint	GOTERM_BP_DIRECT	5	0.21796	0.084826	CCNA2, TAOK3, CDK1, TOPBP1, NBN	1934	15	16792	2.89417	1	1	0.994509
GO:0016254~preassembly of GPI anchor in ER membrane	GOTERM_BP_DIRECT	5	0.21796	0.084826	PIGN, PIGA, PIGL, PIGW, PIGX	1934	15	16792	2.89417	1	1	0.994509
GO:0006488~dolichol-linked oligosaccharide biosynthetic process	GOTERM_BP_DIRECT	5	0.21796	0.084826	ALG8, ALG9, ALG2, ALG3, ALG13	1934	15	16792	2.89417	1	1	0.994509
GO:0032874~positive regulation of stress-activated MAPK cascade	GOTERM_BP_DIRECT	5	0.21796	0.084826	TAOK3, PDCD10, STK25, TAOK1, CARD9	1934	15	16792	2.89417	1	1	0.994509
GO:0000470~maturation of LSU-rRNA	GOTERM_BP_DIRECT	5	0.21796	0.084826	RPL7A, RSL1D1, MRPL1, EIF6, TEX10	1934	15	16792	2.89417	1	1	0.994509
GO:2000060~positive regulation of protein ubiquitination involved in ubiquitin-dependent protein catabolic process	GOTERM_BP_DIRECT	5	0.21796	0.084826	SMURF1, PTEN, AXIN1, PTK2B, PTK2	1934	15	16792	2.89417	1	1	0.994509
GO:0061024~membrane organization	GOTERM_BP_DIRECT	8	0.348736	0.0677869	YWHAE, GNPAT, RALA, YWHAQ, YWHAB, LPCAT2, LNPEP, YWHAZ	1934	32	16792	2.17063	1	1	0.994509
GO:0033209~tumor necrosis factor-mediated signaling pathway	GOTERM_BP_DIRECT	20	0.87184	0.0818012	PLVAP, PSMD11, STAT1, KRT8, TNFRSF10B, TNFRSF10A, TNFRSF1B, PSMD8, PSMA3, KRT18, PSMA1, PSMB2, PSMD5, PSMC1, PSME4, PTK2B, LTBR, UBA52, MAP3K14, BIRC3	1934	118	16792	1.47161	1	1	0.994509
GO:0030433~ER-associated ubiquitin-dependent protein catabolic process	GOTERM_BP_DIRECT	12	0.523104	0.078785	FOXRED2, PSMC1, KIAA0368, TMUB1, UBXN8, TRIM13, AUP1, STT3B, ERLIN2, UBE2G2, UBXN4, UBQLN2	1934	60	16792	1.7365	1	1	0.994509
GO:0043433~negative regulation of sequence-specific DNA binding transcription factor activity	GOTERM_BP_DIRECT	12	0.523104	0.078785	RB1, MAD2L2, TCF7L2, SP100, ID1, CTNNBIP1, RLIM, KEAP1, TRIB1, SIRT1, PEX14, RNF2	1934	60	16792	1.7365	1	1	0.994509
GO:0043647~inositol phosphate metabolic process	GOTERM_BP_DIRECT	10	0.43592	0.0849198	INPP4A, IMPA2, PTEN, PLCG2, OCRL, PLCD3, IP6K1, CALM2, NUDT3, IP6K2	1934	47	16792	1.84735	1	1	0.994509
GO:0006270~DNA replication initiation	GOTERM_BP_DIRECT	8	0.348736	0.0677869	POLA1, ORC6, CCNE2, CCNE1, GINS4, TOPBP1, POLE, MCM2	1934	32	16792	2.17063	1	1	0.994509
GO:0006913~nucleocytoplasmic transport	GOTERM_BP_DIRECT	7	0.305144	0.0599112	EIF5A, NUP205, RSRC1, ANP32E, UPF3A, CAMK1, NSRP1	1934	25	16792	2.43111	1	1	0.994509
GO:0006606~protein import into nucleus	GOTERM_BP_DIRECT	12	0.523104	0.0645122	NUP214, NUP93, PDIA3, RPAIN, PPP1R10, NUP85, CSE1L, NUP50, CRY2, NUP153, KPNA2, SNUPN	1934	58	16792	1.79638	1	1	0.994509
GO:0048208~COPII vesicle coating	GOTERM_BP_DIRECT	13	0.566696	0.0432334	ANKRD28, SEC16A, CSNK1D, GOLGA2, LMAN1, SCFD1, TFG, PPP6R3, TMED2, STX5, PREB, CTSC, SEC31A	1934	61	16792	1.85037	1	1	0.994509
GO:0043928~exonucleolytic nuclear-transcribed mRNA catabolic process involved in deadenylation-dependent decay	GOTERM_BP_DIRECT	8	0.348736	0.0424719	EXOSC7, LSM7, LSM6, DIS3, EXOSC8, LSM5, EXOSC2, PATL1	1934	29	16792	2.39518	1	1	0.994509
GO:0006294~nucleotide-excision repair, preincision complex assembly	GOTERM_BP_DIRECT	8	0.348736	0.0424719	CDK7, ERCC3, PARP1, ERCC2, XPA, CHD1L, UBA52, DDB2	1934	29	16792	2.39518	1	1	0.994509
GO:0043542~endothelial cell migration	GOTERM_BP_DIRECT	8	0.348736	0.0424719	PAXIP1, PLXND1, STAT1, PTEN, PRKX, RHOA, PTK2, TGFBR1	1934	29	16792	2.39518	1	1	0.994509
GO:0006461~protein complex assembly	GOTERM_BP_DIRECT	21	0.915432	0.0419385	HFE, HMGA1, FANCA, CAPG, PEX14, ADD2, OXA1L, AFG3L2, CHAF1B, PPP2R1A, PARD3, DLG5, ZW10, CDK1, GEMIN5, PTK2B, PPIH, NCKAP1L, SSBP3, ATPAF1, MAPK3	1934	116	16792	1.57184	1	1	0.994509
GO:0071902~positive regulation of protein serine/threonine kinase activity	GOTERM_BP_DIRECT	9	0.392328	0.041885	PPP2CA, MAP2K2, PDCD10, STRADA, CAMK1, CALM2, RHOA, TELO2, STK3	1934	35	16792	2.23265	1	1	0.994509
GO:0006295~nucleotide-excision repair, DNA incision, 3'-to lesion	GOTERM_BP_DIRECT	7	0.305144	0.0415907	BIVM, ERCC3, PARP1, ERCC2, XPA, CHD1L, DDB2	1934	23	16792	2.64251	1	1	0.994509
GO:0030036~actin cytoskeleton organization	GOTERM_BP_DIRECT	23	1.00262	0.040992	GAS2L3, LIMK1, RHOG, ARPC5, SDAD1, RHOA, ADD2, BCR, NISCH, DIAPH1, CYTH2, NUAK2, DLC1, TRIP10, NF1, SPIRE1, RAC3, ARFIP2, KRAS, DOCK2, WASF2, PDLIM7, PHACTR4	1934	130	16792	1.53614	1	1	0.994509
GO:0044319~wound healing, spreading of cells	GOTERM_BP_DIRECT	5	0.21796	0.0405751	TOR1A, PDCD10, LCP1, RHOA, CYR61	1934	12	16792	3.61772	1	1	0.994509
GO:0000244~spliceosomal tri-snRNP complex assembly	GOTERM_BP_DIRECT	5	0.21796	0.0405751	SART3, USP4, DDX20, PRPF19, SRSF10	1934	12	16792	3.61772	1	1	0.994509
GO:0007041~lysosomal transport	GOTERM_BP_DIRECT	5	0.21796	0.0405751	HGSNAT, VPS51, NEDD4, VPS54, TMEM106B	1934	12	16792	3.61772	1	1	0.994509
GO:0035278~miRNA mediated inhibition of translation	GOTERM_BP_DIRECT	5	0.21796	0.0405751	ZFP36, EIF6, AGO4, AGO1, TNRC6A	1934	12	16792	3.61772	1	1	0.994509
GO:0006511~ubiquitin-dependent protein catabolic process	GOTERM_BP_DIRECT	30	1.30776	0.0435222	PSMD11, USP16, USP31, USP10, USP33, RNF8, UBR3, FBXO21, UBE2L3, ZNRF3, USP1, ARIH1, USP46, USP48, UBE2I, USP4, USP44, SIAH2, USP22, USP2, USP45, UBE2G2, TRPC4AP, UCHL5, COPS3, ITCH, PSMA3, PSMA1, RLIM, UBE2K	1934	182	16792	1.43119	1	1	0.994509
GO:0097502~mannosylation	GOTERM_BP_DIRECT	5	0.21796	0.0405751	ALG8, ALG9, ALG2, ALG3, PIGZ	1934	12	16792	3.61772	1	1	0.994509
GO:0031100~organ regeneration	GOTERM_BP_DIRECT	11	0.479512	0.0386198	PRPS2, TGFBR3, CCNA2, MED1, PRPS1, CDK4, GSTP1, PPAT, CAD, CDK1, LCP1	1934	47	16792	2.03208	1	1	0.994509
GO:0010586~miRNA metabolic process	GOTERM_BP_DIRECT	4	0.174368	0.0373067	ZCCHC11, AGO4, AGO1, BCDIN3D	1934	7	16792	4.96144	1	1	0.994509
GO:0051683~establishment of Golgi localization	GOTERM_BP_DIRECT	4	0.174368	0.0373067	PDCD10, STK25, COPG1, YWHAZ	1934	7	16792	4.96144	1	1	0.994509
GO:0010909~positive regulation of heparan sulfate proteoglycan biosynthetic process	GOTERM_BP_DIRECT	3	0.130776	0.0366891	TCF7L2, PXYLP1, CTNNB1	1934	3	16792	8.68252	1	1	0.994509
GO:0090234~regulation of kinetochore assembly	GOTERM_BP_DIRECT	3	0.130776	0.0366891	SENP6, TRAPPC12, RNF4	1934	3	16792	8.68252	1	1	0.994509
GO:0055070~copper ion homeostasis	GOTERM_BP_DIRECT	3	0.130776	0.0366891	XIAP, COMMD1, CUTC	1934	3	16792	8.68252	1	1	0.994509
GO:1904667~negative regulation of ubiquitin protein ligase activity	GOTERM_BP_DIRECT	3	0.130776	0.0366891	MAD2L2, USP44, MAD2L1	1934	3	16792	8.68252	1	1	0.994509
GO:0044205~'de novo' UMP biosynthetic process	GOTERM_BP_DIRECT	3	0.130776	0.0366891	CAD, UMPS, DHODH	1934	3	16792	8.68252	1	1	0.994509
GO:0006272~leading strand elongation	GOTERM_BP_DIRECT	3	0.130776	0.0366891	POLA1, PCNA, POLE	1934	3	16792	8.68252	1	1	0.994509
GO:0016573~histone acetylation	GOTERM_BP_DIRECT	9	0.392328	0.0357956	ING5, TADA2A, KAT6B, TRRAP, NCOA3, KAT6A, WDR75, CDYL, TAF1	1934	34	16792	2.29831	1	1	0.994509
GO:0043124~negative regulation of I-kappaB kinase/NF-kappaB signaling	GOTERM_BP_DIRECT	10	0.43592	0.0350427	PER1, PPM1A, NLRX1, TNIP1, STAT1, USP10, DNAJA3, GSTP1, TRIM59, SIRT1	1934	40	16792	2.17063	1	1	0.994509
GO:0000717~nucleotide-excision repair, DNA duplex unwinding	GOTERM_BP_DIRECT	7	0.305144	0.0339423	ERCC3, PARP1, ERCC2, XPA, CHD1L, UBA52, DDB2	1934	22	16792	2.76262	1	1	0.994509
GO:0030521~androgen receptor signaling pathway	GOTERM_BP_DIRECT	10	0.43592	0.0404768	RB1, MED1, CDK7, CCNE1, NCOA3, FHL2, CTNNB1, MED16, RNF4, MED17	1934	41	16792	2.11769	1	1	0.994509
GO:0032147~activation of protein kinase activity	GOTERM_BP_DIRECT	10	0.43592	0.0677791	TPX2, DLG1, STRADA, STRADB, AXIN1, KIF14, PRKAG2, NCKAP1L, ADNP, DBF4B	1934	45	16792	1.92945	1	1	0.994509
GO:0034976~response to endoplasmic reticulum stress	GOTERM_BP_DIRECT	15	0.65388	0.0455133	PDIA3, PDIA2, CXCL8, UBA5, FAM129A, TNFRSF10B, PDIA5, BBC3, ERN1, TMX4, TMX1, FLOT1, TARDBP, MBTPS2, ATF4	1934	75	16792	1.7365	1	1	0.994509
GO:0045089~positive regulation of innate immune response	GOTERM_BP_DIRECT	6	0.261552	0.0478683	PLSCR1, POLR3D, CARD9, HMGB2, POLR3G, EREG	1934	18	16792	2.89417	1	1	0.994509
GO:0000381~regulation of alternative mRNA splicing, via spliceosome	GOTERM_BP_DIRECT	9	0.392328	0.0641062	HNRNPL, RBM25, RBFOX2, TRA2B, SAP18, NSRP1, RBM7, SRSF6, RBMX	1934	38	16792	2.05639	1	1	0.994509
GO:0006521~regulation of cellular amino acid metabolic process	GOTERM_BP_DIRECT	11	0.479512	0.0628028	PSMD8, NQO1, PSMA3, PSMD11, PSMA1, PSMB2, PSMD5, PSMC1, ODC1, PSME4, OAZ3	1934	51	16792	1.8727	1	1	0.994509
GO:0070423~nucleotide-binding oligomerization domain containing signaling pathway	GOTERM_BP_DIRECT	7	0.305144	0.0599112	ITCH, IRAK1, CHUK, RIPK2, TAB3, TAB2, UBA52	1934	25	16792	2.43111	1	1	0.994509
GO:0033151~V(D)J recombination	GOTERM_BP_DIRECT	4	0.174368	0.0984962	DCLRE1C, LIG1, HMGB2, LIG3	1934	10	16792	3.47301	1	1	0.994509
GO:0031398~positive regulation of protein ubiquitination	GOTERM_BP_DIRECT	13	0.566696	0.0593276	PAXIP1, RIPK2, SPHK1, AXIN1, XIAP, COMMD1, HSPBP1, UBE2L3, RASSF1, DNAJA3, RASSF5, SPRTN, BIRC3	1934	64	16792	1.76364	1	1	0.994509
GO:0016601~Rac protein signal transduction	GOTERM_BP_DIRECT	6	0.261552	0.0590191	NISCH, NCKAP1, HACE1, RHOG, HACD3, WASF2	1934	19	16792	2.74185	1	1	0.994509
GO:0060716~labyrinthine layer blood vessel development	GOTERM_BP_DIRECT	6	0.261552	0.0590191	HEY1, MAPK1, TMED2, PLCD3, JUNB, CYR61	1934	19	16792	2.74185	1	1	0.994509
GO:0000028~ribosomal small subunit assembly	GOTERM_BP_DIRECT	6	0.261552	0.0590191	RPS15, RPS14, RPS5, MRPS11, RPS27L, RPS10	1934	19	16792	2.74185	1	1	0.994509
GO:0009116~nucleoside metabolic process	GOTERM_BP_DIRECT	6	0.261552	0.0590191	PRPS2, PRPS1, PPAT, UPP1, UMPS, DNPH1	1934	19	16792	2.74185	1	1	0.994509
GO:0051865~protein autoubiquitination	GOTERM_BP_DIRECT	11	0.479512	0.0560194	CNOT4, RNF13, RNF8, TRIM13, RNF181, ERCC8, RNF4, TRIM21, RNF141, RNF41, DDB2	1934	50	16792	1.91016	1	1	0.994509
GO:2000641~regulation of early endosome to late endosome transport	GOTERM_BP_DIRECT	4	0.174368	0.0546767	MAP2K2, CHMP3, MAPK1, MAPK3	1934	8	16792	4.34126	1	1	0.994509
GO:0070544~histone H3-K36 demethylation	GOTERM_BP_DIRECT	4	0.174368	0.0546767	KDM4A, KDM2A, KDM8, C14ORF169	1934	8	16792	4.34126	1	1	0.994509
GO:0006890~retrograde vesicle-mediated transport, Golgi to ER	GOTERM_BP_DIRECT	16	0.697472	0.0460556	ARF3, UVRAG, KIF11, ARFGAP3, ARFGAP1, ARCN1, RINT1, GOLPH3, SCFD1, RER1, ZW10, TMED3, TMED2, COPG1, KDELR3, ARF5	1934	82	16792	1.69415	1	1	0.994509
GO:0017183~peptidyl-diphthamide biosynthetic process from peptidyl-histidine	GOTERM_BP_DIRECT	4	0.174368	0.0546767	DPH2, DPH5, DPH6, DPH7	1934	8	16792	4.34126	1	1	0.994509
GO:0032872~regulation of stress-activated MAPK cascade	GOTERM_BP_DIRECT	4	0.174368	0.0546767	MAP2K2, GSTP1, MAPK1, MAPK3	1934	8	16792	4.34126	1	1	0.994509
GO:0051056~regulation of small GTPase mediated signal transduction	GOTERM_BP_DIRECT	23	1.00262	0.0545198	ARHGAP11A, PLEKHG2, FAM13B, STARD8, RHOG, ARHGAP1, OCRL, ARAP1, ARHGAP15, GMIP, MYO9A, ARHGAP6, RHOA, VAV2, BCR, ARHGAP33, RHOT2, DLC1, TRIP10, RAC3, ARHGEF2, SOS2, RHOQ	1934	134	16792	1.49028	1	1	0.994509
GO:0006119~oxidative phosphorylation	GOTERM_BP_DIRECT	5	0.21796	0.0534144	MSH2, UQCRB, UQCRC2, GBAS, FXN	1934	13	16792	3.33943	1	1	0.994509
GO:0016180~snRNA processing	GOTERM_BP_DIRECT	5	0.21796	0.0534144	INTS1, INTS10, INTS5, INTS4, INTS7	1934	13	16792	3.33943	1	1	0.994509
GO:0030099~myeloid cell differentiation	GOTERM_BP_DIRECT	7	0.305144	0.0502406	SNRK, CBFB, KAT6A, TET2, PRKX, HOXB7, RASGRP4	1934	24	16792	2.5324	1	1	0.994509
GO:0045648~positive regulation of erythrocyte differentiation	GOTERM_BP_DIRECT	7	0.305144	0.0502406	STAT5B, MED1, HMGB2, NCKAP1L, GATA2, HIF1A, ZNF16	1934	24	16792	2.5324	1	1	0.994509
GO:0006297~nucleotide-excision repair, DNA gap filling	GOTERM_BP_DIRECT	7	0.305144	0.0502406	RFC5, POLD4, PCNA, LIG1, LIG3, POLE, UBA52	1934	24	16792	2.5324	1	1	0.994509
GO:0007131~reciprocal meiotic recombination	GOTERM_BP_DIRECT	8	0.348736	0.0500954	RAD51B, MSH6, KLHDC3, RAD51, MSH2, XRCC3, MND1, MLH3	1934	30	16792	2.31534	1	1	0.994509
GO:0042769~DNA damage response, detection of DNA damage	GOTERM_BP_DIRECT	9	0.392328	0.0486224	RFC5, POLD4, MRPS9, PCNA, MRPS35, PARP1, MRPS11, USP1, UBA52	1934	36	16792	2.17063	1	1	0.994509
GO:0007017~microtubule-based process	GOTERM_BP_DIRECT	9	0.392328	0.0486224	EML4, TUBA1C, NEK9, TUBA1B, VBP1, EHHADH, TUBB, TUBB4B, GTSE1	1934	36	16792	2.17063	1	1	0.994509
GO:0018105~peptidyl-serine phosphorylation	GOTERM_BP_DIRECT	22	0.959024	0.0481927	SMG1, MORC3, PRKCH, PKN3, NEK6, PLK1, MAST1, CSNK1D, PRKX, TGFBR1, LATS2, MAPKAPK3, TLK2, CDK1, MAPK1, RICTOR, PRKCQ, SGK3, PKN1, PAK2, TAF1, MAPK3	1934	125	16792	1.52812	1	1	0.994509
GO:0030705~cytoskeleton-dependent intracellular transport	GOTERM_BP_DIRECT	6	0.261552	0.0478683	TUBA1C, TUBA1B, KIF16B, TUBB, KIF13B, KIF14	1934	18	16792	2.89417	1	1	0.994509
GO:2000774~positive regulation of cellular senescence	GOTERM_BP_DIRECT	4	0.174368	0.0546767	HMGA1, KRAS, EEF1E1, SIRT1	1934	8	16792	4.34126	1	1	0.994509
GO:0050821~protein stabilization	GOTERM_BP_DIRECT	22	0.959024	0.0989383	WNT10B, MORC3, USP33, USP2, PTEN, HIP1R, WIZ, CREBL2, PARK7, STK3, SAV1, HCFC1, RASSF1, PDCD10, DNAJA3, ZNF207, CDC37L1, VHL, IFT46, GTSE1, TELO2, TAF1	1934	136	16792	1.40453	1	1	0.994509
