# Supplementary material for: Cell cycle arrest explains the observed bulk 3D genomic alterations in response to long-term heat shock in K562 cells
Source: HighWire-hosted journal article supplement (doi:10.1101/gr.276554.122), 2022-07-01
Supplement: Supplemental_Table_S5.xlsx [file Supplemental_Table_S5.xlsx]

## Sheet: Sheet1
Proportion of M cells in G2/M cells by microscopy
Replicate	NHS	SHS	LHS
Rep1	41/130 (31.5%)	44/123 (35.8%)	110/230 (47.8%)
Rep2	41/110 (37.2%)	32/82 (39.0%)	47/98 (47.9%)
Rep3	37/103 (35.9%)	29/80 (36.3%)	38/81 (46.9%)
total	119/343 (34.7%)	105/285 (36.8%)	195/409 (47.7%)
